# Supplementary material for: Chiral Brønsted acid-catalyzed asymmetric dearomative spirocyclization of alkynyl thioethers
Source: Royal Society of Chemistry journal article supplement (doi:10.1039/d3gc03222a), 2023-01-01

Supporting Information

**Chiral Brønsted acid-catalyzed asymmetric dearomative  
spirocyclization of alkynyl thioethers**

Xin-Yang Fan,<sup>a</sup> Jia-Cheng Li,<sup>a</sup> Ji-Jia Zhou,<sup>\*,a</sup> Bo Zhou<sup>a</sup> and Long-Wu Ye<sup>\*,a,b,c</sup>

<sup>a</sup>Key Laboratory for Chemical Biology of Fujian Province and State Key Laboratory of Physical Chemistry of Solid Surfaces, College of Chemistry and Chemical Engineering, Xiamen University, Xiamen 361005, China.

<sup>b</sup>State Key Laboratory of Elemento-Organic Chemistry, Nankai University, Tianjin 300071, China.

<sup>c</sup>State Key Laboratory of Organometallic Chemistry, Shanghai Institute of Organic Chemistry, Chinese Academy of Sciences, Shanghai 200032, China.

| <b>Content</b>                                                        | <b>Page Number</b> |
|-----------------------------------------------------------------------|--------------------|
| <b>1. General Information</b>                                         | 2                  |
| <b>2. Preparation of Starting Materials</b>                           | 3                  |
| <b>3. General Procedure for the Synthesis of Spirocyclic Enones 2</b> | 19                 |
| <b>4. Synthetic Utility Study</b>                                     | 39                 |
| <b>5. References</b>                                                  | 44                 |
| <b>6. Crystal Data</b>                                                | 45                 |
| <b>7. HPLC Chromatograms</b>                                          | 46                 |
| <b>8. NMR Spectra</b>                                                 | 81                 |

## 1. General Information

Ethyl acetate (ACS grade), hexanes (ACS grade), anhydrous 1,2-dichloroethane (ACS grade) and toluene (ACS grade) were obtained commercially and used without further purification. Methylene chloride and tetrahydrofuran were purified according to standard methods unless otherwise noted. Commercially available reagents were used without further purification. Reactions were monitored by thin layer chromatography (TLC) using silicycle pre-coated silica gel plates. Flash column chromatography was performed over silica gel (300-400 mesh). Infrared spectra were recorded on a Nicolet AVATER FTIR330 spectrometer as thin film and are reported in reciprocal centimeter ( $\text{cm}^{-1}$ ). Mass spectra were recorded with Micromass QTOF2 Quadrupole/Time-of-Flight Tandem mass spectrometer using electron spray ionization. HPLC analyses were carried out in a chromatograph equipped with a UV diode-array detector using chiral stationary columns from Daicel.

$^1\text{H}$  NMR spectra were recorded on a Bruker AV-400 spectrometer and a Bruker AV-500 spectrometer in chloroform- $\text{d}_3$ . Chemical shifts are reported in ppm with the internal TMS signal at 0.0 ppm as a standard. The data is being reported as (s = singlet, d = doublet, t = triplet, m = multiplet or unresolved, brs = broad singlet, coupling constant(s) in Hz, integration).

$^{13}\text{C}$  NMR spectra were recorded on a Bruker AV-400 spectrometer and a Bruker AV-500 spectrometer in chloroform- $\text{d}_3$ . Chemical shifts are reported in ppm with the internal chloroform signal at 77.0 ppm as a standard.

## 2. Preparation of Starting Materials

Alkynyl thioethers **1a-1ac** were prepared according to the following procedure.<sup>1,2</sup>

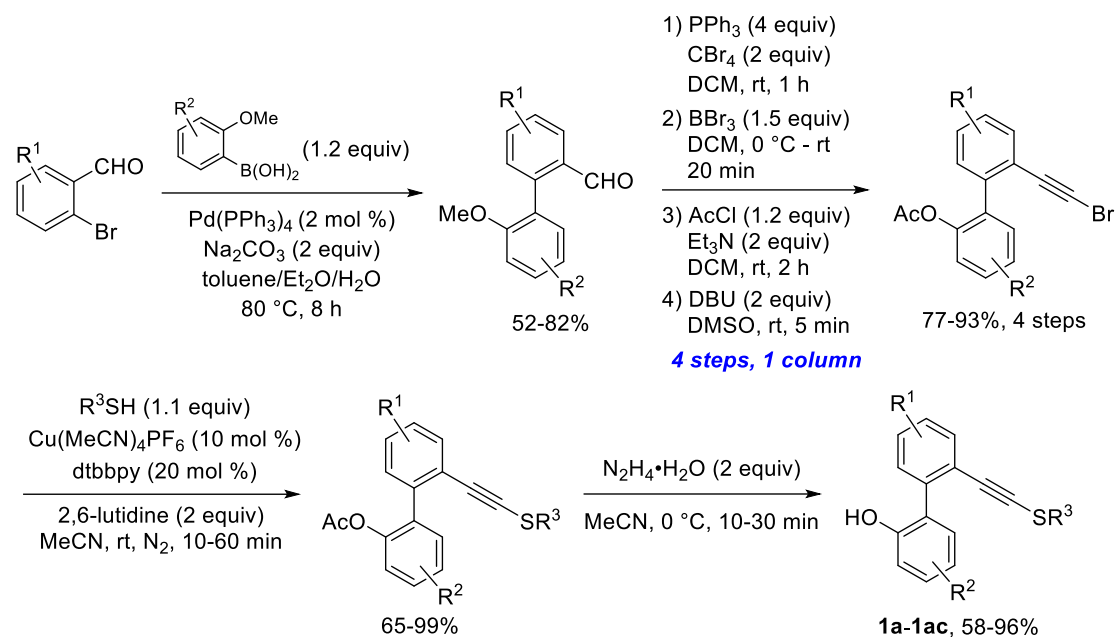

To a suspension of *o*-bromobenzaldehyde derivative (2 mmol), phenylboronic acid (2.4 mmol) and sodium carbonate (4 mmol, 424.0 mg) in the mixed solvent (toluene/EtOH/H<sub>2</sub>O = 2/1/1, 20 mL) was added Pd(PPh<sub>3</sub>)<sub>4</sub> (0.04 mmol, 46.0 mg) at room temperature under N<sub>2</sub> atmosphere. The resulting mixture was stirred at 80 °C for 8 h, and the progress of the reaction was monitored by TLC. Upon completion, the solution was filtered through a pad of silica gel and concentrated under reduced pressure. The residue was purified by chromatography on silica gel (eluent: hexanes/ethyl acetate) to give the biaryl benzaldehyde in 52–82% yield.

To the solution of PPh<sub>3</sub> (8 mmol, 2.1 g) in DCM (6 mL) was added CBr<sub>4</sub> (4 mmol, 1.4 g) slowly at 0 °C, and the reaction was stirred at this temperature for additional 30 min. The solution of the above biaryl benzaldehyde (2 mmol) in DCM (2 mL) was then added to the reaction mixture at 0 °C. The reaction was warmed to room temperature and stirred for 1 h. Upon completion, the reaction was diluted with a mixed solvent (hexanes/ethyl acetate = 30/1, 100 mL), filtered through a pad of silica gel and concentrated under reduced pressure. The obtained dibromide was directly used in the next step without further purification.

To a solution of the above dibromide (1.5 mmol) in DCM (6 mL) was added BBr<sub>3</sub> (2.2

mmol, 2 M in DCM, 2.2 mL) carefully at 0 °C. The reaction mixture was then warmed to room temperature and stirred for 20 min. Upon completion (monitored by TLC), the reaction was quenched with NaHCO<sub>3</sub> (aq), extracted with DCM for three times, dried over MgSO<sub>4</sub> and filtered. The filtrate was concentrated under reduced pressure to give crude free phenol without further purification.

To the solution of above free phenol (1.5 mmol) and Et<sub>3</sub>N (4 mmol, 0.5 mL) in DCM (8 mL) was slowly added acetylchloride (1.8 mmol, 0.13 mL) at 0 °C. Then the resulting mixture was stirred at room temperature for 2 h and the progress of the reaction was monitored by TLC. Upon completion, the reaction was quenched with NaHCO<sub>3</sub> (aq), extracted with DCM for 3 times, dried over MgSO<sub>4</sub> and filtered. The filtrate was concentrated under reduced pressure to afford the corresponding Ac-protected phenol without further purification.

To a solution of the above Ac-protected phenol bearing alkenyl dibromide moiety (1.4 mmol) in DMSO (5 mL) was added DBU (2.8 mmol, 0.4 mL) slowly at room temperature and stirred for 5 min. Upon completion, the reaction was diluted with water, extracted with EtOAc, washed with brine, dried over MgSO<sub>4</sub> and filtered. The filtrate was concentrated under reduced pressure. Then the residue was purified by chromatography on silica gel (eluent: hexanes/ethyl acetate = 30/1) to obtain alkynyl bromide in 77–93% yield (4 steps).

To a dry sealed tube equipped with a stir bar were added alkynyl bromide (1.2 mmol), thiol (1.3 mmol), dtbbpy (0.24 mmol, 64.3 mg) and 2,6-lutidine (2.4 mmol, 0.3 mL) under N<sub>2</sub> atmosphere. Afterwards, dry MeCN (5 mL) was added to the mixture under N<sub>2</sub> atmosphere. While stirring, the solution of Cu(MeCN)<sub>4</sub>PF<sub>6</sub> (0.12 mmol, 44.6 mg in 1 mL dry MeCN) was added in one portion and the progress of the reaction was monitored by TLC. Upon completion, the reaction was concentrated under reduced pressure and the residue was purified by column chromatography on silica gel (eluent: hexanes/ethyl acetate = 15/1) to afford the desired Ac-protected alkynyl thioether.<sup>1</sup>

To a solution of above Ac-protected alkynyl thioether (1 mmol) in MeCN (10 mL) was added N<sub>2</sub>H<sub>4</sub>·H<sub>2</sub>O (2 mmol) dropwise at 0 °C and stirred for additional 10–30 min. The progress of the reaction was monitored by TLC. Upon completion, the reaction was

quenched with saturated aqueous  $\text{NH}_4\text{Cl}$  and extracted with ethyl acetate for 3 times. The organic layer was dried over  $\text{MgSO}_4$ , concentrated and purified by chromatography on silica gel (eluent: hexanes/ethyl acetate) to afford the desired phenol-tethered alkynyl thioether **1a–1ac** in 58–96% yield.

**2'-((((3s,5s,7s)-adamantan-1-yl)thio)ethynyl)-[1,1'-biphenyl]-2-ol (1a)**

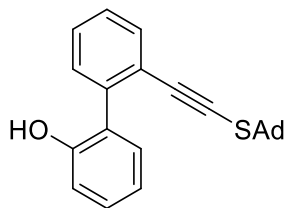

**1a**

Compound **1a** was prepared in 67% overall yield (483.0 mg) as a pale yellow oil.  $^1\text{H}$  NMR (400 MHz,  $\text{CDCl}_3$ )  $\delta$  7.54 – 7.52 (m, 1H), 7.36 – 7.25 (m, 3H), 7.24 – 7.21 (m, 2H), 6.98 – 6.94 (m, 2H), 5.07 (s, 1H), 1.98 – 1.93 (m, 3H), 1.72 – 1.68 (m, 6H), 1.63 – 1.54 (m, 6H);  $^{13}\text{C}$  NMR (100 MHz,  $\text{CDCl}_3$ )  $\delta$  152.7, 138.2, 132.1, 130.7, 130.5, 129.2, 128.0, 128.0, 127.7, 123.9, 120.5, 116.0, 94.6, 82.0, 50.5, 42.7, 35.7, 30.0; IR (neat): 3502(bs), 2906, 2851, 2158(s), 2029, 1959, 1472, 1037, 752, 520; HRESIMS Calcd for  $[\text{C}_{24}\text{H}_{24}\text{NaOS}]^+$  ( $\text{M} + \text{Na}^+$ ) 383.1440, found 383.1437.

**2'-((((3s,5s,7s)-adamantan-1-yl)thio)ethynyl)-4'-fluoro-[1,1'-biphenyl]-2-ol (1b)**

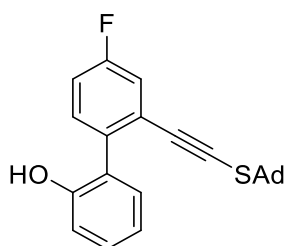

**1b**

Compound **1b** was prepared in 71% overall yield (537.9 mg) as a yellow oil.  $^1\text{H}$  NMR (400 MHz,  $\text{CDCl}_3$ )  $\delta$  7.25 – 7.18 (m, 4H), 7.07 – 7.02 (m, 1H), 6.97 – 6.94 (m, 2H), 5.05 (s, 1H), 2.00 – 1.90 (m, 3H), 1.72 – 1.65 (m, 6H), 1.63 – 1.53 (m, 6H);  $^{13}\text{C}$  NMR (100 MHz,  $\text{CDCl}_3$ )  $\delta$  161.9 (d,  $J = 247.0$  Hz), 152.7, 134.2 (d,  $J = 3.0$  Hz), 132.2 (d,  $J$

= 9.0 Hz), 130.9, 129.3, 126.7, 125.7 (d,  $J = 9.0$  Hz), 120.5, 118.3 (d,  $J = 23.0$  Hz), 115.0, 115.3 (d,  $J = 22.0$  Hz), 93.8 (d,  $J = 3.0$  Hz), 83.5, 50.7, 42.7, 35.6, 30.0;  $^{19}\text{F}$  NMR (376 MHz,  $\text{CDCl}_3$ )  $\delta$  -114.7; IR (neat): 3045(bs), 2906, 2152(s), 1959, 1601, 1307, 881, 726; HRESIMS Calcd for  $[\text{C}_{24}\text{H}_{23}\text{FNaOS}]^+$  ( $\text{M} + \text{Na}^+$ ) 401.1346, found 401.1338.

**2'-((((3s,5s,7s)-adamantan-1-yl)thio)ethynyl)-4'-chloro-[1,1'-biphenyl]-2-ol (1c)**

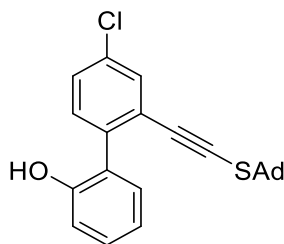

**1c**

Compound **1c** was prepared in 76% overall yield (600.7 mg) as a brown oil.  $^1\text{H}$  NMR (400 MHz,  $\text{CDCl}_3$ )  $\delta$  7.50 (d,  $J = 2.0$  Hz, 1H), 7.31 (dd,  $J = 8.4, 2.4$  Hz, 1H), 7.26 – 7.19 (m, 3H), 6.98 – 6.94 (m, 2H), 5.02 (s, 1H), 1.98 – 1.92 (m, 3H), 1.71 – 1.67 (m, 6H), 1.64 – 1.54 (m, 6H);  $^{13}\text{C}$  NMR (100 MHz,  $\text{CDCl}_3$ )  $\delta$  152.6, 136.6, 133.8, 131.9, 131.6, 130.9, 129.5, 128.1, 126.6, 125.5, 120.6, 116.1, 93.7, 83.8, 50.8, 42.7, 35.7, 30.0; IR (neat): 3613(bs), 3102, 2985, 2157(s), 1957, 1412, 1056, 745; HRESIMS Calcd for  $[\text{C}_{24}\text{H}_{23}\text{ClNaOS}]^+$  ( $\text{M} + \text{Na}^+$ ) 417.1050, found 417.1048.

**2'-((((3s,5s,7s)-adamantan-1-yl)thio)ethynyl)-4'-(trifluoromethyl)-[1,1'-biphenyl]-2-ol (1d)**

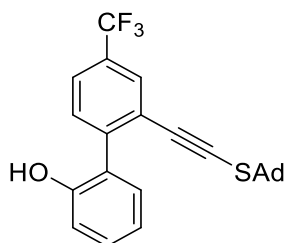

**1d**

Compound **1d** was prepared in 43% overall yield (368.6 mg) as a yellow oil.  $^1\text{H}$  NMR (400 MHz,  $\text{CDCl}_3$ )  $\delta$  7.77 (s, 1H), 7.56 (d,  $J = 8.0$  Hz, 1H), 7.43 (d,  $J = 8.0$  Hz, 1H), 7.28 – 7.21 (m, 2H), 7.00 – 6.95 (m, 2H), 5.11 (s, 1H), 1.98 – 1.93 (m, 3H), 1.71 – 1.67 (m, 6H), 1.64 – 1.53 (m, 6H);  $^{13}\text{C}$  NMR (100 MHz,  $\text{CDCl}_3$ )  $\delta$  152.5, 141.9, 131.1, 130.7,

130.2 (q,  $J = 32.0$  Hz), 129.7, 128.7 (q,  $J = 4.0$  Hz), 126.6, 124.7, 124.2 (q,  $J = 3.0$  Hz), 123.6 (q,  $J = 271.0$  Hz), 120.8, 116.3, 93.8, 84.2, 50.9, 42.7, 35.7, 30.0;  $^{19}\text{F}$  NMR (376 MHz,  $\text{CDCl}_3$ )  $\delta$  -62.4; IR (neat): 3498(bs), 3048, 2928, 2160(s), 1958, 1558, 729, 588,523; HRESIMS Calcd for  $[\text{C}_{25}\text{H}_{23}\text{F}_3\text{NaOS}]^+$  ( $\text{M} + \text{Na}^+$ ) 451.1314, found 451.1303.

**2'-((((3s,5s,7s)-adamantan-1-yl)thio)ethynyl)-4'-methyl-[1,1'-biphenyl]-2-ol (1e)**

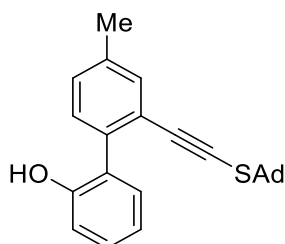

**1e**

Compound **1e** was prepared in 65% overall yield (486.1 mg) as a pale yellow oil.  $^1\text{H}$  NMR (400 MHz,  $\text{CDCl}_3$ )  $\delta$  7.37 (s, 1H), 7.25 – 7.18 (m, 4H), 6.97 – 6.93 (m, 2H), 5.05 (s, 1H), 2.36 (s, 3H), 1.98 – 1.93 (m, 3H), 1.72 – 1.67 (m, 6H), 1.63 – 1.54 (m, 6H);  $^{13}\text{C}$  NMR (100 MHz,  $\text{CDCl}_3$ )  $\delta$  152.8, 137.9, 135.2, 132.6, 130.8, 130.4, 129.1, 129.0, 127.5, 123.7, 120.4, 115.8, 94.7, 81.5, 50.5, 42.7, 35.7, 30.0, 20.9; IR (neat): 3494(bs), 3029, 2905, 2849, 2152(s), 1763, 1451, 1367, 1178, 1037, 758; HRESIMS Calcd for  $[\text{C}_{25}\text{H}_{26}\text{NaOS}]^+$  ( $\text{M} + \text{Na}^+$ ) 397.1597, found 397.1604.

**2'-((((3s,5s,7s)-adamantan-1-yl)thio)ethynyl)-4'-methoxy-[1,1'-biphenyl]-2-ol (1f)**

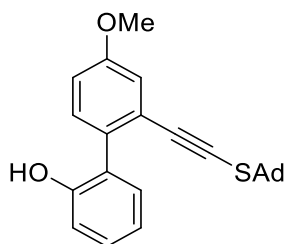

**1f**

Compound **1f** was prepared in 53% overall yield (413.5 mg) as an orange oil.  $^1\text{H}$  NMR (400 MHz,  $\text{CDCl}_3$ )  $\delta$  7.24 – 7.19 (m, 3H), 7.05 (d,  $J = 2.8$  Hz, 1H), 6.97 – 6.90 (m, 3H), 5.24 (s, 1H), 3.82 (s, 3H), 1.99 – 1.92 (m, 3H), 1.72 – 1.67 (m, 6H), 1.63 – 1.54 (m, 6H);  $^{13}\text{C}$  NMR (100 MHz,  $\text{CDCl}_3$ )  $\delta$  159.1, 153.0, 131.7, 131.0, 130.5, 129.0, 127.3,

124.9, 120.3, 116.3, 115.7, 115.0, 94.7, 81.8, 55.4, 50.6, 42.7, 35.7, 30.0; IR (neat): 3444(bs), 2904, 2850, 2155(s), 1958, 1607, 1473, 1282, 1037, 774, 552; HRESIMS Calcd for  $[C_{25}H_{26}NaO_2S]^+$  ( $M + Na^+$ ) 413.1546, found 413.1555.

**2'-((((3s,5s,7s)-adamantan-1-yl)thio)ethynyl)-[1,1'-biphenyl]-2,4'-diol (**1g**)**

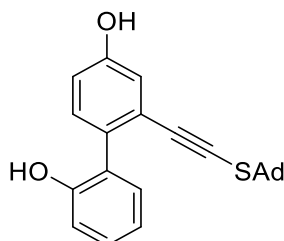

**1g**

Compound **1g** was prepared in 37% overall yield (274.1 mg) as a yellow oil.  $^1H$  NMR (400 MHz,  $CDCl_3$ )  $\delta$  7.16 – 7.11 (m, 2H), 7.06 (d,  $J = 8.4$  Hz, 1H), 6.89 – 6.85 (m, 3H), 6.75 (dd,  $J = 8.4, 2.4$  Hz, 1H), 6.17 (s, 1H), 5.20 (s, 1H), 1.88 – 1.84 (m, 3H), 1.61 – 1.58 (m, 6H), 1.55 – 1.45 (m, 6H);  $^{13}C$  NMR (100 MHz,  $CDCl_3$ )  $\delta$  155.5, 152.8, 131.8, 131.0, 130.2, 128.9, 127.4, 124.9, 120.4, 118.4, 115.8, 115.7, 94.6, 81.7, 50.6, 42.7, 35.7, 30.0; IR (neat): 3620(bs), 3104, 2948, 2160(s), 1958, 1417, 1039, 843, 745, 530; HRESIMS Calcd for  $[C_{24}H_{24}NaO_2S]^+$  ( $M + Na^+$ ) 399.1389, found 399.1401.

**2'-((((3s,5s,7s)-adamantan-1-yl)thio)ethynyl)-5'-fluoro-[1,1'-biphenyl]-2-ol (**1h**)**

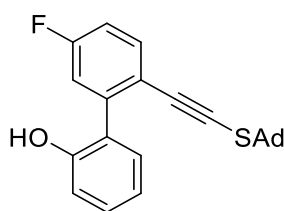

**1h**

Compound **1h** was prepared in 80% overall yield (566.8 mg) as a pale yellow oil.  $^1H$  NMR (400 MHz,  $CDCl_3$ )  $\delta$  7.45 – 7.41 (m, 1H), 7.20– 7.13 (m, 2H), 6.99 – 6.95 (m, 2H), 6.92 – 6.88 (m, 2H), 5.01 (s, 1H), 1.90 – 1.84 (m, 3H), 1.63 – 1.60 (m, 6H), 1.56 – 1.46 (m, 6H);  $^{13}C$  NMR (100 MHz,  $CDCl_3$ )  $\delta$  161.9 (d,  $J = 249.0$  Hz), 152.5, 140.9 (d,  $J = 8.0$  Hz), 134.0 (d,  $J = 9.0$  Hz), 130.6, 129.6, 126.8 (d,  $J = 1.0$  Hz), 120.7, 119.9 (d,  $J = 4.0$  Hz), 117.7 (d,  $J = 22.0$  Hz), 116.3, 115.3 (d,  $J = 22.0$  Hz), 93.5, 81.5, 50.6,



42.7, 35.7, 30.0;  $^{19}\text{F}$  NMR (376 MHz,  $\text{CDCl}_3$ )  $\delta$  -116.1; IR (neat): 3459(bs), 2906, 2850, 2159(s), 1448, 1298, 1263, 1040, 752, 588; HRESIMS Calcd for  $[\text{C}_{24}\text{H}_{23}\text{FNaOS}]^+$  ( $\text{M} + \text{Na}^+$ ) 401.1346, found 401.1351.

**2'-((((3s,5s,7s)-adamantan-1-yl)thio)ethynyl)-5'-chloro-[1,1'-biphenyl]-2-ol (1i)**

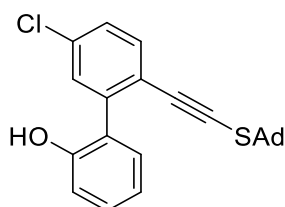

**1i**

Compound **1i** was prepared in 72% overall yield (413.5 mg) as a yellow solid (mp 201-203 °C).  $^1\text{H}$  NMR (400 MHz,  $\text{CDCl}_3$ )  $\delta$  7.44 (dd,  $J = 7.6, 1.6$  Hz, 1H), 7.24 – 7.19 (m, 4H), 6.99 – 6.95 (m, 2H), 5.06 (s, 1H), 1.98 – 1.92 (m, 3H), 1.71 – 1.67 (m, 6H), 1.63 – 1.53 (m, 6H);  $^{13}\text{C}$  NMR (100 MHz,  $\text{CDCl}_3$ )  $\delta$  152.6, 140.0, 133.6, 133.1, 130.6, 130.5, 129.6, 128.1, 126.6, 122.3, 120.7, 116.3, 93.8, 83.1, 50.7, 42.7, 35.7, 30.0; IR (neat): 3440(bs), 3079, 2904, 2158(s), 2028, 1737, 1298, 1041, 726, 684, 540; HRESIMS Calcd for  $[\text{C}_{24}\text{H}_{23}\text{ClNaOS}]^+$  ( $\text{M} + \text{Na}^+$ ) 417.1050, found 417.1074.

**2'-((((3s,5s,7s)-adamantan-1-yl)thio)ethynyl)-5'-methyl-[1,1'-biphenyl]-2-ol (1j)**

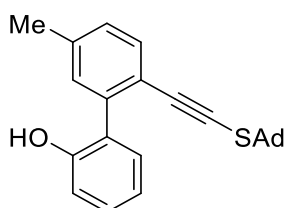

**1j**

Compound **1j** was prepared in 55% overall yield (409.8 mg) as a pale yellow oil.  $^1\text{H}$  NMR (400 MHz,  $\text{CDCl}_3$ )  $\delta$  7.37 (d,  $J = 8.0$  Hz, 1H), 7.18 – 7.14 (m, 2H), 7.10 – 7.05 (m, 2H), 6.91 – 6.87 (m, 2H), 5.00 (s, 1H), 2.30 (s, 3H), 1.91 – 1.86 (m, 3H), 1.64 – 1.51 (m, 6H), 1.56 – 1.47 (m, 6H);  $^{13}\text{C}$  NMR (100 MHz,  $\text{CDCl}_3$ )  $\delta$  152.7, 138.4, 138.2, 132.2, 131.2, 130.7, 129.1, 128.9, 127.8, 120.9, 120.4, 115.9, 94.5, 80.9, 50.4, 42.7, 35.8, 30.0, 21.4; IR (neat): 3460(bs), 3057, 2907, 2849, 2153(s), 1709, 1447, 1231, 754,

589, 536; HRESIMS Calcd for  $[C_{25}H_{26}NaOS]^+$  ( $M + Na^+$ ) 397.1597, found 397.1600.

**2'-((((3s,5s,7s)-adamantan-1-yl)thio)ethynyl)-5'-methoxy-[1,1'-biphenyl]-2-ol (1k)**

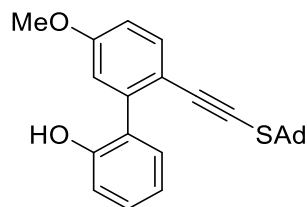

**1k**

Compound **1k** was prepared in 58% overall yield (457.0 mg) as a yellow oil.  $^1H$  NMR (400 MHz,  $CDCl_3$ )  $\delta$  7.48 (d,  $J = 8.8$  Hz, 1H), 7.27 – 7.22 (m, 2H), 6.99 – 6.95 (m, 2H), 6.89 (dd,  $J = 8.4, 2.4$  Hz, 1H), 6.84 (d,  $J = 2.4$  Hz, 1H), 5.12 (s, 1H), 3.82 (s, 3H), 1.99 – 1.93 (m, 3H), 1.72 – 1.68 (m, 6H), 1.64 – 1.55 (m, 6H);  $^{13}C$  NMR (100 MHz,  $CDCl_3$ )  $\delta$  159.5, 152.7, 140.3, 133.9, 130.6, 129.3, 127.7, 120.5, 116.1, 116.0, 115.6, 114.3, 94.1, 79.7, 55.4, 50.3, 42.7, 35.8, 30.1; IR (neat): 3440(bs), 3000, 2906, 2850, 2162(s), 1958, 1604, 1242, 1211, 1018, 751, 589; HRESIMS Calcd for  $[C_{25}H_{26}NaO_2S]^+$  ( $M + Na^+$ ) 413.1546, found 413.1558.

**2'-((((3s,5s,7s)-adamantan-1-yl)thio)ethynyl)-3'-chloro-[1,1'-biphenyl]-2-ol (1l)**

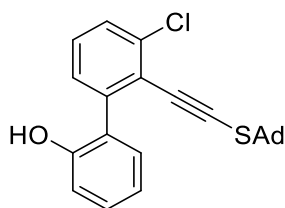

**1l**

Compound **1l** was prepared in 33% overall yield (262.6 mg) as a pale yellow oil.  $^1H$  NMR (400 MHz,  $CDCl_3$ )  $\delta$  7.44 (dd,  $J = 7.6, 0.8$  Hz, 1H), 7.28 – 7.24 (m, 2H), 7.21 – 7.20 (m, 2H), 6.99 – 6.96 (m, 2H), 5.00 (s, 1H), 2.00 – 1.96 (m, 3H), 1.78 – 1.76 (m, 6H), 1.65 – 1.56 (m, 6H);  $^{13}C$  NMR (100 MHz,  $CDCl_3$ )  $\delta$  152.6, 140.2, 136.1, 130.7, 129.6, 128.8, 128.7, 128.1, 127.1, 123.8, 120.6, 116.2, 91.8, 88.5, 51.0, 42.8, 35.8, 30.1; IR (neat): 3429(bs), 3063, 2906, 2850, 2158(s), 1958, 1297, 1102, 1040, 754, 635; HRESIMS Calcd for  $[C_{24}H_{23}ClNaOS]^+$  ( $M + Na^+$ ) 417.1050, found 417.1059.

**2'-((((3s,5s,7s)-adamantan-1-yl)thio)ethynyl)-5-fluoro-[1,1'-biphenyl]-2-ol (1m)**

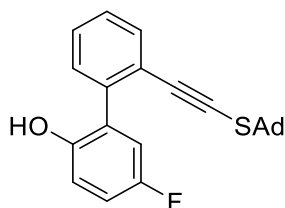

**1m**

Compound **1m** was prepared in 45% overall yield (338.7 mg) as a brown oil.  $^1\text{H}$  NMR (400 MHz,  $\text{CDCl}_3$ )  $\delta$  7.53 – 7.51 (m, 1H), 7.36 – 7.31 (m, 2H), 7.28 – 7.24 (m, 1H), 6.97 – 6.88 (m, 3H), 5.00 (s, 1H), 2.01 – 1.93 (s, 3H), 1.76 – 1.69 (m, 6H), 1.65 – 1.55 (m, 6H);  $^{13}\text{C}$  NMR (100 MHz,  $\text{CDCl}_3$ )  $\delta$  156.7 (d,  $J = 237$  Hz), 148.8 (d,  $J = 2.0$  Hz), 137.2, 132.2, 130.2, 128.6 (d,  $J = 8.0$  Hz), 128.3, 128.1, 123.7, 117.0, 116.9 (d,  $J = 14.0$  Hz), 115.5 (d,  $J = 23.0$  Hz), 94.3, 82.6, 50.6, 42.8, 35.7, 30.0;  $^{19}\text{F}$  NMR (376 MHz,  $\text{CDCl}_3$ )  $\delta$  -115.3; IR (neat): 3428(bs), 3012, 2907, 2850, 2160(s), 1958, 1737, 1578, 1109, 1072, 834, 730, 590; HRESIMS Calcd for  $[\text{C}_{24}\text{H}_{23}\text{FNaOS}]^+$  ( $\text{M} + \text{Na}^+$ ) 401.1346, found 401.1342.

**2'-((((3s,5s,7s)-adamantan-1-yl)thio)ethynyl)-5-chloro-[1,1'-biphenyl]-2-ol (1n)**

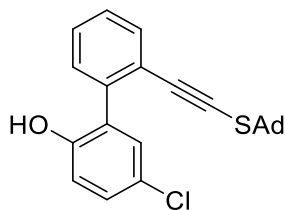

**1n**

Compound **1n** was prepared in 57% overall yield (451.5 mg) as a pale yellow oil.  $^1\text{H}$  NMR (400 MHz,  $\text{CDCl}_3$ )  $\delta$  7.55 – 7.53 (m, 1H), 7.38 – 7.35 (m, 2H), 7.29 – 7.27 (m, 1H), 7.23 – 7.19 (m, 2H), 6.92 (d,  $J = 8.8$  Hz, 1H), 5.05 (s, 1H), 2.02 – 1.96 (m, 3H), 1.75 – 1.70 (m, 6H), 1.66 – 1.55 (m, 6H);  $^{13}\text{C}$  NMR (100 MHz,  $\text{CDCl}_3$ )  $\delta$  151.5, 136.8, 132.3, 130.3, 130.3, 129.1, 129.0, 128.5, 128.2, 125.2, 123.9, 117.4, 94.2, 82.8, 50.6, 42.8, 35.8, 30.1; IR (neat): 3441(bs), 3063, 2906, 2850, 2158(s), 1958, 1462, 1388, 1298, 1240, 1039, 834, 751, 601; HRESIMS Calcd for  $[\text{C}_{24}\text{H}_{23}\text{ClNaOS}]^+$  ( $\text{M} + \text{Na}^+$ )

417.1050, found 417.1066.

**2'-((((3s,5s,7s)-adamantan-1-yl)thio)ethynyl)-5-methyl-[1,1'-biphenyl]-2-ol (1o)**

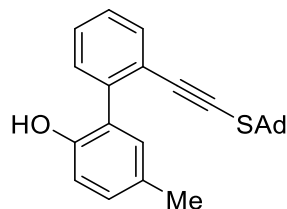

**1o**

Compound **1o** was prepared in 68% overall yield (509.4 mg) as a brown oil. <sup>1</sup>H NMR (400 MHz, CDCl<sub>3</sub>) δ 7.55 – 7.51 (m, 1H), 7.34 – 7.27 (m, 3H), 7.04 – 7.02 (m, 2H), 6.88 – 6.86 (m, 1H), 4.92 (s, 1H), 2.28 (s, 3H), 1.98 – 1.91 (m, 3H), 1.72 – 1.68 (m, 6H), 1.63 – 1.53 (m, 6H); <sup>13</sup>C NMR (100 MHz, CDCl<sub>3</sub>) δ 150.5, 138.5, 132.0, 131.0, 130.5, 129.7, 129.5, 128.0, 127.9, 127.4, 123.8, 115.9, 94.7, 81.8, 50.5, 42.7, 35.7, 30.0, 20.4; IR (neat): 3363 (bs), 3061, 2905, 2849, 2160(s), 1958, 1672, 1450, 1239, 1040, 824, 751, 583; HRESIMS Calcd for [C<sub>25</sub>H<sub>26</sub>NaOS]<sup>+</sup> (M + Na<sup>+</sup>) 397.1597, found 397.1606.

**2'-((((3s,5s,7s)-adamantan-1-yl)thio)ethynyl)-5-ethyl-[1,1'-biphenyl]-2-ol (1p)**

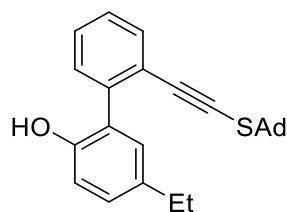

**1p**

Compound **1p** was prepared in 75% overall yield (583.7 mg) as a brown oil. <sup>1</sup>H NMR (400 MHz, CDCl<sub>3</sub>) δ 7.52 (dd, *J* = 6.0, 1.2 Hz, 1H), 7.35 – 7.29 (m, 3H), 7.08 – 7.05 (m, 2H), 6.89 (d, *J* = 7.6 Hz, 1H), 4.97 (s, 1H), 2.59 (q, *J* = 7.6 Hz, 2H), 1.98 – 1.90 (m, 3H), 1.72 – 1.68 (m, 6H), 1.63 – 1.53 (m, 6H), 1.22 (t, *J* = 7.6 Hz, 3H); <sup>13</sup>C NMR (100 MHz, CDCl<sub>3</sub>) δ 150.6, 138.7, 136.0, 132.0, 130.6, 129.9, 128.5, 128.0, 127.8, 127.5, 123.8, 115.9, 94.8, 81.9, 50.4, 42.7, 35.7, 30.0, 27.9, 15.7; IR (neat): 3433(bs), 3068, 2905, 2850, 2157(s), 1958, 1450, 1407, 1297, 1039, 736, 626, 604; HRESIMS Calcd

for  $[\text{C}_{26}\text{H}_{28}\text{NaOS}]^+$  ( $\text{M} + \text{Na}^+$ ) 411.1753, found 411.1752.

**2'-((((3s,5s,7s)-adamantan-1-yl)thio)ethynyl)-4-chloro-[1,1'-biphenyl]-2-ol (1q)**

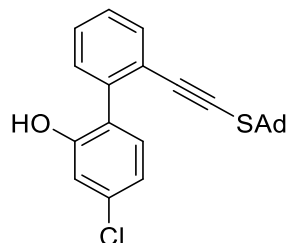

**1q**

Compound **1q** was prepared in 59% overall yield (466.2 mg) as a pale yellow oil.  $^1\text{H}$  NMR (400 MHz,  $\text{CDCl}_3$ )  $\delta$  7.54 – 7.52 (m, 1H), 7.37 – 7.35 (m, 2H), 7.27 (d,  $J = 4.0$  Hz, 1H), 7.16 (d,  $J = 8.0$  Hz, 1H), 7.01 (d,  $J = 1.6$  Hz, 1H), 6.96 (dd,  $J = 8.0, 1.6$  Hz, 1H), 5.19 (s, 1H), 2.05 – 1.96 (m, 3H), 1.76 – 1.69 (m, 6H), 1.67 – 1.55 (m, 6H);  $^{13}\text{C}$  NMR (100 MHz,  $\text{CDCl}_3$ )  $\delta$  153.5, 136.9, 134.5, 132.1, 131.6, 130.4, 128.4, 128.1, 126.3, 124.0, 120.8, 116.4, 94.3, 82.6, 50.6, 42.8, 35.8, 30.0; IR (neat): 3597(bs), 3023, 2908, 2850, 2156(s), 2028, 1958, 1556, 1245, 1028, 747, 688, 583; HRESIMS Calcd for  $[\text{C}_{24}\text{H}_{23}\text{ClNaOS}]^+$  ( $\text{M} + \text{Na}^+$ ) 417.1050, found 417.1055.

**2'-((((3s,5s,7s)-adamantan-1-yl)thio)ethynyl)-4-methyl-[1,1'-biphenyl]-2-ol (1r)**

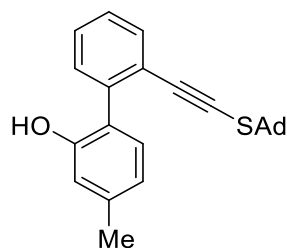

**1r**

Compound **1r** was prepared in 61% overall yield (457.8 mg) as a orange solid (mp 133–135 °C).  $^1\text{H}$  NMR (400 MHz,  $\text{CDCl}_3$ )  $\delta$  7.52 – 7.50 (m, 1H), 7.34 – 7.26 (m, 3H), 7.11 (d,  $J = 7.6$  Hz, 1H), 6.80 – 6.76 (m, 2H), 5.02 (s, 1H), 2.32 (s, 3H), 2.00 – 1.92 (m, 3H), 1.75 – 1.68 (m, 6H), 1.64 – 1.54 (m, 6H);  $^{13}\text{C}$  NMR (100 MHz,  $\text{CDCl}_3$ )  $\delta$  152.5, 139.3, 138.1, 132.0, 130.6, 130.5, 127.9, 127.8, 124.8, 124.0, 121.3, 116.6, 94.8, 81.8, 50.4, 42.7, 35.7, 30.0, 21.2; IR (neat): 3489(bs), 3062, 2908, 2850, 2158(s), 1713, 1473, 1450, 1039, 1016, 824, 749, 622; HRESIMS Calcd for  $[\text{C}_{25}\text{H}_{26}\text{NaOS}]^+$  ( $\text{M} + \text{Na}^+$ ) 397.1597,

found 397.1596.

**2'-((((3s,5s,7s)-adamantan-1-yl)thio)ethynyl)-4-methoxy-[1,1'-biphenyl]-2-ol (1s)**

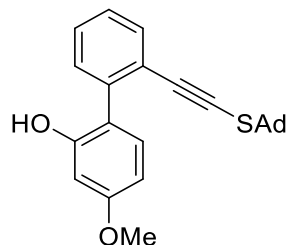

**1s**

Compound **1s** was prepared in 74% overall yield (576.3 mg) as a brown oil.  $^1\text{H}$  NMR (400 MHz,  $\text{CDCl}_3$ )  $\delta$  7.54 – 7.51 (m, 1H), 7.35 – 7.31 (m, 2H), 7.20 – 7.27 (m, 1H), 7.15 – 7.13 (m, 1H), 6.57 – 6.49 (m, 2H), 5.11 (s, 1H), 3.79 (s, 3H), 2.00 – 1.94 (m, 3H), 1.76 – 1.72 (m, 6H), 1.65 – 1.55 (m, 6H);  $^{13}\text{C}$  NMR (100 MHz,  $\text{CDCl}_3$ )  $\delta$  160.6, 153.7, 137.9, 132.1, 131.3, 130.8, 128.1, 127.8, 124.2, 120.3, 106.7, 101.3, 94.8, 81.9, 55.2, 50.5, 42.8, 35.8, 30.1; IR (neat): 3454(bs), 2976, 2903, 2849, 2158(s), 2028, 1568, 1236, 1171, 1039, 617, 566, 539; HRESIMS Calcd for  $[\text{C}_{25}\text{H}_{26}\text{NaO}_2\text{S}]^+$  ( $\text{M} + \text{Na}^+$ ) 413.1546, found 413.1560.

**2'-((((3s,5s,7s)-adamantan-1-yl)thio)ethynyl)-3-chloro-[1,1'-biphenyl]-2-ol (1t)**

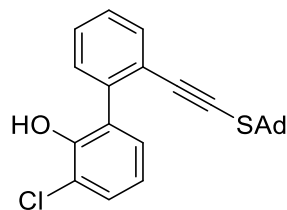

**1t**

Compound **1t** was prepared in 36% overall yield (287.0 mg) as a yellow oil.  $^1\text{H}$  NMR (400 MHz,  $\text{CDCl}_3$ )  $\delta$  7.54 – 7.52 (m, 1H), 7.35 – 7.28 (m, 4H), 7.19 (dd,  $J = 7.6, 1.6$  Hz, 1H), 6.93 – 6.90 (m, 1H), 5.55 (s, 1H), 2.01 – 1.95 (m, 3H), 1.73 – 1.69 (m, 6H), 1.65 – 1.53 (m, 6H);  $^{13}\text{C}$  NMR (100 MHz,  $\text{CDCl}_3$ )  $\delta$  148.8, 138.3, 132.0, 130.1, 130.0, 129.3, 128.6, 127.9, 127.6, 123.8, 120.7, 120.5, 95.0, 81.2, 50.3, 42.8, 35.8, 30.1; IR (neat): 3501(bs), 3011, 2907, 2851, 2157(s), 2028, 1958, 1370, 1209, 968, 912, 750, 611; HRESIMS Calcd for  $[\text{C}_{24}\text{H}_{23}\text{ClNaOS}]^+$  ( $\text{M} + \text{Na}^+$ ) 417.1050, found 417.1068.

**2'-((((3s,5s,7s)-adamantan-1-yl)thio)ethynyl)-3-chloro-[1,1'-biphenyl]-2-ol (1u)**

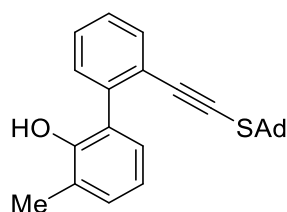

**1u**

Compound **1u** was prepared in 46% overall yield (358.1 mg) as a pale yellow oil.  $^1\text{H}$  NMR (400 MHz,  $\text{CDCl}_3$ )  $\delta$  7.53 – 7.51 (m, 1H), 7.37 – 7.27 (m, 3H), 7.09 (d,  $J = 7.2$  Hz, 1H), 7.05 (dd,  $J = 7.6, 1.6$  Hz, 1H), 6.87 – 6.84 (m, 1H), 5.03 (s, 1H), 2.28 (s, 3H), 1.97 – 1.90 (m, 3H), 1.65 – 1.68 (m, 6H), 1.62 – 1.50 (m, 6H);  $^{13}\text{C}$  NMR (100 MHz,  $\text{CDCl}_3$ )  $\delta$  150.8, 138.5, 132.0, 130.6, 130.5, 128.2, 128.0, 127.9, 127.1, 124.7, 124.0, 119.9, 94.7, 81.9, 50.4, 42.6, 35.7, 30.0, 16.2; IR (neat): 3453(bs), 3061, 2906, 2850, 2160(s), 1736, 1659, 1450, 1251, 1166, 1039, 750; HRESIMS Calcd for  $[\text{C}_{25}\text{H}_{26}\text{NaOS}]^+$  ( $\text{M} + \text{Na}^+$ ) 397.1597, found 397.1590.

**2'-((((1S,3S,5R)-3-methyladamantan-1-yl)thio)ethynyl)-[1,1'-biphenyl]-2-ol (1v)**

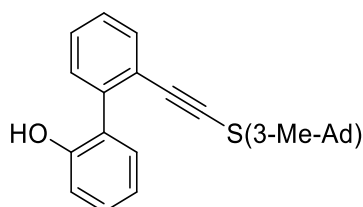

**1v**

Compound **1v** was prepared in 66% overall yield (515.2 mg) as a red oil.  $^1\text{H}$  NMR (400 MHz,  $\text{CDCl}_3$ )  $\delta$  7.52 (d,  $J = 6.0$  Hz, 1H), 7.33 – 7.26 (m, 3H), 7.24 – 7.21 (m, 2H), 6.98 – 6.94 (m, 2H), 5.08 (s, 1H), 2.06 – 1.94 (m, 2H), 1.65 – 1.55 (m, 4H), 1.48 – 1.45 (m, 4H), 1.36 – 1.28 (m, 4H), 0.77 (s, 3H);  $^{13}\text{C}$  NMR (100 MHz,  $\text{CDCl}_3$ )  $\delta$  152.7, 138.2, 132.2, 130.7, 130.5, 129.3, 128.0, 127.9, 127.6, 123.9, 120.5, 116.0, 94.6, 82.0, 50.8, 49.4, 42.8, 41.9, 34.9, 32.4, 30.4, 30.3; IR (neat): 3421(bs), 3062, 2904, 2844, 2162(s), 1738, 1455, 1308, 1239, 988, 776, 749, 687; HRESIMS Calcd for  $[\text{C}_{25}\text{H}_{26}\text{NaOS}]^+$  ( $\text{M} + \text{Na}^+$ ) 397.1597, found 397.1602.

**2'-((((1r,3R,5S)-3,5,7-trimethyladamantan-1-yl)thio)ethynyl)-[1,1'-biphenyl]-2-ol  
(1w)**

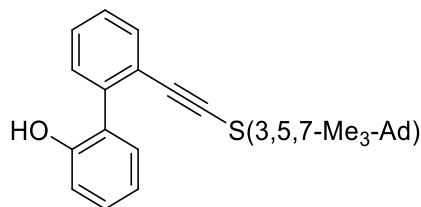

**1w**

Compound **1w** was prepared in 60% overall yield (483.7 mg) as a yellow oil.  $^1\text{H}$  NMR (400 MHz,  $\text{CDCl}_3$ )  $\delta$  7.54 – 7.52 (m, 1H), 7.35 – 7.28 (m, 3H), 7.25 – 7.22 (m, 2H), 7.01 – 6.94 (m, 2H), 5.51 (s, 1H), 1.33 – 1.27 (m, 6H), 1.03 – 0.95 (m, 6H), 0.80 (s, 9H);  $^{13}\text{C}$  NMR (100 MHz,  $\text{CDCl}_3$ )  $\delta$  152.8, 138.3, 132.3, 130.8, 130.6, 129.5, 128.0, 127.9, 127.6, 123.8, 120.5, 116.2, 94.7, 81.8, 51.4, 49.4, 48.1, 33.6, 29.6; IR (neat): 3505(bs), 3010, 2907, 2837, 2160(s), 1557, 1472, 1456, 1181, 756, 583; HRESIMS Calcd for  $[\text{C}_{27}\text{H}_{30}\text{NaOS}]^+$  ( $\text{M} + \text{Na}^+$ ) 425.1910, found 425.1896.

**2'-((((1R,2r,3S,5r)-adamantan-2-yl)thio)ethynyl)-[1,1'-biphenyl]-2-ol (1x)**

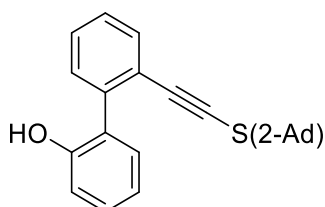

**1x**

Compound **1x** was prepared in 59% overall yield (451.5 mg) as a orange oil.  $^1\text{H}$  NMR (400 MHz,  $\text{CDCl}_3$ )  $\delta$  7.52 – 7.49 (m, 1H), 7.35 – 7.27 (m, 4H), 7.20 (dd,  $J = 7.2, 1.6$  Hz, 1H), 6.98 – 6.94 (m, 2H), 5.04 (s, 1H), 3.36 – 3.31 (m, 1H), 2.01 – 1.98 (m, 2H), 1.85 – 1.79 (m, 6H), 1.70 – 1.64 (m, 4H), 1.49 – 1.46 (m, 2H);  $^{13}\text{C}$  NMR (100 MHz,  $\text{CDCl}_3$ )  $\delta$  152.7, 138.3, 131.7, 130.7, 130.4, 129.3, 128.0, 127.4, 123.8, 120.4, 115.9, 91.7, 84.6, 57.7, 38.5, 37.6, 31.9, 31.4, 27.5, 27.2; IR (neat): 3471(bs), 3061, 2906, 2850, 2156(s), 1958, 1737, 1461, 1449, 1238, 748, 588; HRESIMS Calcd for  $[\text{C}_{24}\text{H}_{24}\text{NaOS}]^+$  ( $\text{M} + \text{Na}^+$ ) 383.1440, found 383.1461.



**2'-((*tert*-butylthio)ethynyl)-[1,1'-biphenyl]-2-ol (1y)**

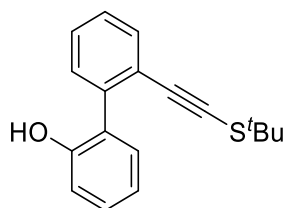

**1y**

Compound **1y** was prepared in 63% overall yield (423.6 mg) as a pale yellow oil. <sup>1</sup>H NMR (400 MHz, CDCl<sub>3</sub>) δ 7.54 – 7.52 (m, 1H), 7.35 – 7.29 (m, 3H), 7.25 – 7.21 (m, 2H), 6.97 – 6.94 (m, 2H), 5.06 (s, 1H), 1.20 (s, 9H); <sup>13</sup>C NMR (100 MHz, CDCl<sub>3</sub>) δ 152.7, 138.1, 131.9, 130.7, 130.5, 129.3, 128.0, 128.0, 127.5, 123.9, 120.5, 116.0, 94.6, 83.5, 48.6, 30.1; IR (neat): 3520(bs), 3056, 2962, 2922, 2863, 2161(s), 1958, 1609, 1581, 1290, 1041, 934, 580; HRESIMS Calcd for [C<sub>18</sub>H<sub>18</sub>NaOS]<sup>+</sup> (M + Na<sup>+</sup>) 305.0971, found 305.0959.

**2'-((isopropylthio)ethynyl)-[1,1'-biphenyl]-2-ol (1z)**

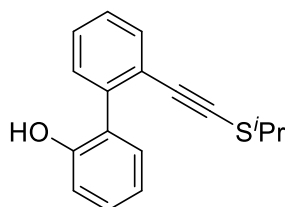

**1z**

Compound **1z** was prepared in 73% overall yield (353.8 mg) as a yellow oil. <sup>1</sup>H NMR (400 MHz, CDCl<sub>3</sub>) δ 7.57 – 7.55 (m, 1H), 7.41 – 7.35 (m, 3H), 7.31 – 7.25 (m, 2H), 7.02 – 6.98 (m, 2H), 5.07 (s, 1H), 3.06 – 2.96 (m, 1H), 1.20 (s, 3H), 1.18 (s, 3H); <sup>13</sup>C NMR (100 MHz, CDCl<sub>3</sub>) δ 152.7, 138.3, 131.9, 130.8, 130.4, 129.4, 128.1, 128.0, 127.4, 123.8, 120.5, 116.0, 93.4, 83.2, 40.0, 22.7; IR (neat): 3449(bs), 3025, 2959, 2922, 2368, 2157(s), 2028, 1958, 1617, 1583, 1034, 729; HRESIMS Calcd for [C<sub>17</sub>H<sub>16</sub>NaOS]<sup>+</sup> (M + Na<sup>+</sup>) 291.0814, found 291.0829.

**2'-((cyclohexylthio)ethynyl)-[1,1'-biphenyl]-2-ol (1aa)**

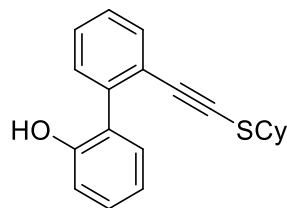

**1aa**

Compound **1aa** was prepared in 78% overall yield (479.9 mg) as a pale yellow oil.  $^1\text{H}$  NMR (400 MHz,  $\text{CDCl}_3$ )  $\delta$  7.52 – 7.50 (m, 1H), 7.37 – 7.29 (m, 3H), 7.28 – 7.20 (m, 2H), 6.99 – 6.94 (m, 2H), 5.06 (s, 1H), 2.73 – 2.65 (m, 1H), 1.80 – 1.75 (m, 2H), 1.68 – 1.65 (m, 2H), 1.56 – 1.52 (m, 1H), 1.26 – 1.11 (m, 5H);  $^{13}\text{C}$  NMR (100 MHz,  $\text{CDCl}_3$ )  $\delta$  152.7, 138.3, 131.8, 130.8, 130.4, 129.3, 128.0, 127.9, 127.5, 123.8, 120.4, 115.9, 92.9, 83.3, 47.7, 32.8, 26.1, 25.1; IR (neat): 3440(bs), 3000, 2906, 2850, 2162(s), 1958, 1604, 1242, 1211, 1018, 751, 589; HRESIMS Calcd for  $[\text{C}_{20}\text{H}_{20}\text{NaOS}]^+$  ( $\text{M} + \text{Na}^+$ ) 331.1127, found 331.1126.

**2'-((benzylthio)ethynyl)-[1,1'-biphenyl]-2-ol (1ab)**

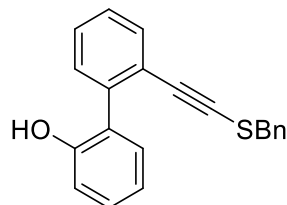

**1ab**

Compound **1ab** was prepared in 57% overall yield (631.2 mg) as a brown oil.  $^1\text{H}$  NMR (400 MHz,  $\text{CDCl}_3$ )  $\delta$  7.41 (d,  $J = 7.2$  Hz, 1H), 7.30 – 7.20 (m, 8H), 7.07 – 7.05 (m, 2H), 6.98 – 6.94 (m, 2H), 5.13 (s, 1H), 3.72 (s, 2H);  $^{13}\text{C}$  NMR (100 MHz,  $\text{CDCl}_3$ )  $\delta$  152.6, 138.4, 136.5, 131.9, 130.9, 130.3, 129.5, 128.8, 128.4, 128.2, 127.8, 127.5, 127.3, 123.3, 120.4, 116.0, 93.1, 83.9, 40.3; IR (neat): 3410(bs), 3060, 3029, 2927, 2163(s), 2028, 1958, 1610, 1580, 1423, 911, 894, 552; HRESIMS Calcd for  $[\text{C}_{21}\text{H}_{16}\text{NaOS}]^+$  ( $\text{M} + \text{Na}^+$ ) 339.0814, found 339.0795.

**2'-((phenylthio)ethynyl)-[1,1'-biphenyl]-2-ol (1ac)**

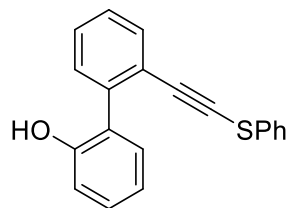

**1ac**

Compound **1ac** was prepared in 43% overall yield (260.6 mg) as a pale yellow oil.  $^1\text{H}$  NMR (400 MHz,  $\text{CDCl}_3$ )  $\delta$  7.59 (d,  $J = 7.5$  Hz, 1H), 7.43 – 7.35 (m, 3H), 7.33 – 7.27 (m, 2H), 7.20 – 7.14 (m, 3H), 7.05 – 6.99 (m, 4H), 5.02 (s, 1H);  $^{13}\text{C}$  NMR (100 MHz,  $\text{CDCl}_3$ )  $\delta$  152.6, 138.4, 132.4, 132.1, 130.8, 130.5, 129.6, 129.2, 128.7, 128.1, 127.2, 126.2, 125.9, 123.3, 120.6, 116.0, 96.8, 79.5; IR (neat): 3523(bs), 3012, 2330, 2161(s), 1958, 1653, 1149, 986, 893, 834, 639; HRESIMS Calcd for  $[\text{C}_{20}\text{H}_{14}\text{NaOS}]^+$  ( $\text{M} + \text{Na}^+$ ) 325.0658, found 325.0659.

### 3. General Procedure for the Synthesis of Spirocyclic Enones **2**

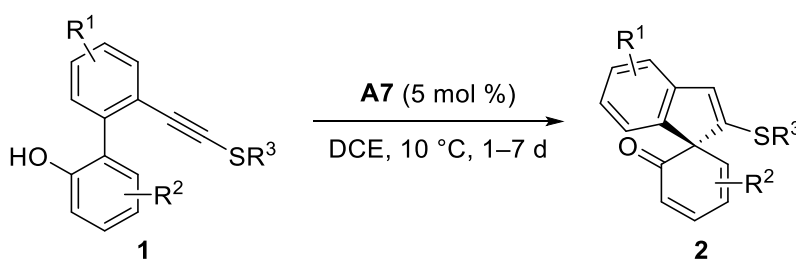

To a mixture of alkyne **1** (0.1 mmol) in DCE (2 mL) was added **A7** (0.005 mmol, 4.6 mg) at 10 °C. Then, the reaction mixture was stirred at 10 °C and the progress of the reaction was monitored by TLC. Upon completion, the mixture was quenched by  $\text{Et}_3\text{N}$  (0.012 mmol, 1.7  $\mu\text{L}$ ) and concentrated under reduced pressure. The residue was purified by chromatography on silica gel (eluent: hexanes/acetone) to afford the desired chiral spirocyclic enone **2**.

**(S)**-2'-(((3R,5R,7R)-adamantan-1-yl)thio)spiro[cyclohexane-1,1'-indene]-2,4-dien-6-one (**2a**)

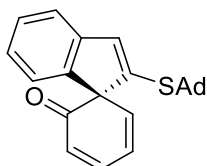

**2a**

Compound **2a** was prepared in 93% yield (33.5 mg) according to the general procedure (Table 2, entry 1). The product was purified by chromatography on silica gel (eluent: hexanes/acetone = 15/1) as a yellow solid (mp 156–158 °C).  $[\alpha]_D^{20} = +241.7^\circ$  ( $c = 1.0$ ,  $\text{CHCl}_3$ ). 96:4 e.r. (determined by HPLC: Chiralpak IA Column, 20/80 *i*-PrOH/hexane, 1.0 mL/min, 254nm; TR = 6.20 min (major), 7.58 min (minor)).  $^1\text{H}$  NMR (400 MHz,  $\text{CDCl}_3$ )  $\delta$  7.28 – 7.18 (m, 3H), 7.08 – 7.04 (m, 1H), 7.02 – 6.99 (m, 2H), 6.48 (ddd,  $J = 9.2, 5.6, 0.4$  Hz, 1H), 6.21 (d,  $J = 10.0$  Hz, 1H), 5.95 – 5.92 (m, 1H), 2.06 – 1.98 (m, 9H), 1.69 – 1.68 (m, 6H);  $^{13}\text{C}$  NMR (100 MHz,  $\text{CDCl}_3$ )  $\delta$  196.9, 145.2, 143.6, 142.7, 142.1, 140.5, 135.4, 128.1, 127.3, 125.3, 122.9, 122.0, 120.6, 72.7, 50.0, 43.5, 36.0, 29.9; IR (neat): 3441, 2905, 2848, 1958, 1666(s), 1630, 1461, 1039, 748, 688; HRESIMS Calcd for  $[\text{C}_{24}\text{H}_{24}\text{NaOS}]^+$  ( $\text{M} + \text{Na}^+$ ) 383.1440, found 383.1443.

**(S)-2'-(((3R,5R,7R)-adamantan-1-yl)thio)-5'-fluorospiro[cyclohexane-1,1'-indene]-2,4-dien-6-one (2b)**

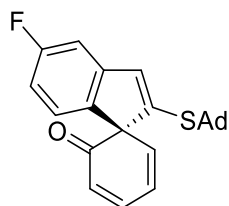

**2b**

Compound **2b** was prepared in 72% yield (27.2 mg) according to the general procedure (Table 2, entry 2). The product was purified by chromatography on silica gel (eluent: hexanes/acetone = 20/1) as an orange oil.  $[\alpha]_D^{20} = +228.2^\circ$  ( $c = 1.0$ ,  $\text{CHCl}_3$ ). 97:3 e.r. (determined by HPLC: Chiralpak IA Column, 20/80 *i*-PrOH/hexane, 1.0 mL/min, 254nm; TR = 6.22 min (major), 7.17 min (minor)).  $^1\text{H}$  NMR (400 MHz,  $\text{CDCl}_3$ )  $\delta$  7.24 – 7.20 (m, 1H), 6.97 – 6.91 (m, 3H), 6.77 – 6.72 (m, 1H), 6.50 (dd,  $J = 9.2, 6.0$  Hz, 1H),

6.22 (d,  $J = 9.6$  Hz, 1H), 5.93 (d,  $J = 8.8$  Hz, 1H), 2.11 – 2.06 (m, 3H), 2.03 – 2.01 (m, 6H), 1.73 – 1.67 (m, 6H);  $^{13}\text{C}$  NMR (100 MHz,  $\text{CDCl}_3$ )  $\delta$  196.7, 163.1 (d,  $J = 244.0$  Hz), 147.4 (d,  $J = 10.0$  Hz), 145.1, 142.7, 140.3, 138.9 (d,  $J = 3.0$  Hz), 133.4 (d,  $J = 2.0$  Hz), 127.4, 123.1, 123.0, 111.8 (d,  $J = 23.0$  Hz), 107.8 (d,  $J = 24.0$  Hz), 71.9, 50.5, 43.5, 36.1, 30.0;  $^{19}\text{F}$  NMR (376 MHz,  $\text{CDCl}_3$ )  $\delta$  -114.0; IR (neat): 3058, 2907, 2850, 1958, 1712, 1591(s), 1559, 1540, 1488, 1193, 965, 754, 689; HRESIMS Calcd for  $[\text{C}_{24}\text{H}_{23}\text{FNaOS}]^+$  ( $\text{M} + \text{Na}^+$ ) 401.1346, found 401.1350.

**(*S*)-2'-(((3*R*,5*R*,7*R*)-adamantan-1-yl)thio)-5'-chlorospiro[cyclohexane-1,1'-indene]-2,4-dien-6-one (2c)**

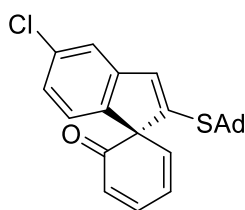

**2c**

Compound **2c** was prepared in 86% yield (33.9 mg) according to the general procedure (Table 2, entry 3). The product was purified by chromatography on silica gel (eluent: hexanes/acetone = 15/1) as a yellow oil.  $[\alpha]_{\text{D}}^{20} = +283.4^\circ$  ( $c = 1.0$ ,  $\text{CHCl}_3$ ). 96:4 e.r. (determined by HPLC: Chiralpak IC Column, 20/80 *i*-PrOH/hexane, 1.0 mL/min, 254nm; TR = 7.99 min (major), 8.86 min (minor)).  $^1\text{H}$  NMR (400 MHz,  $\text{CDCl}_3$ )  $\delta$  7.24 – 7.20 (m, 2H), 7.03 (dd,  $J = 8.0, 1.6$  Hz, 1H), 6.93 – 6.90 (m, 2H), 6.51 (dd,  $J = 9.2, 6.0$  Hz, 1H), 6.22 (d,  $J = 10.0$  Hz, 1H), 5.92 (d,  $J = 9.2$  Hz, 1H), 2.08 – 1.98 (m, 9H), 1.74 – 1.66 (m, 6H);  $^{13}\text{C}$  NMR (100 MHz,  $\text{CDCl}_3$ )  $\delta$  196.4, 147.0, 144.9, 142.8, 141.7, 139.9, 134.2, 133.0, 127.4, 125.1, 123.3, 123.0, 120.6, 72.1, 50.5, 43.4, 36.0, 30.0; IR (neat): 2906, 2850, 2028, 1958, 1668(s), 1635, 1445, 1297, 1037, 751, 551; HRESIMS Calcd for  $[\text{C}_{24}\text{H}_{23}\text{ClNaOS}]^+$  ( $\text{M} + \text{Na}^+$ ) 417.1050, found 417.1057.

**(*S*)-2'-(((3*R*,5*R*,7*R*)-adamantan-1-yl)thio)-5'-(trifluoromethyl)spiro[cyclohexane-1,1'-indene]-2,4-dien-6-one (2d)**

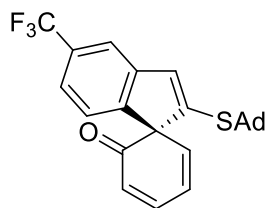

**2d**

Compound **2d** was prepared in 71% yield (30.4 mg) according to the general procedure (Table 2, entry 4). The product was purified by chromatography on silica gel (eluent: hexanes/acetone = 15/1) as a brown oil.  $[\alpha]_D^{20} = +3.8^\circ$  ( $c = 1.0$ ,  $\text{CHCl}_3$ ). 90:10 e.r. (determined by HPLC: Chiralpak IA Column, 20/80 *i*-PrOH/hexane, 1.0 mL/min, 254nm; TR = 5.07 min (minor), 5.98 min (major)).  $^1\text{H NMR}$  (400 MHz,  $\text{CDCl}_3$ )  $\delta$  7.51 (s, 1H), 7.33 (d,  $J = 7.6$  Hz, 1H), 7.27 – 7.23 (m, 1H), 7.09 (d,  $J = 7.6$  Hz, 1H), 7.01 (s, 1H), 6.57 – 6.53 (m, 1H), 6.24 (d,  $J = 9.6$  Hz, 1H), 5.92 (d,  $J = 9.2$  Hz, 1H), 2.09 – 2.00 (m, 9H), 1.73 – 1.69 (m, 6H);  $^{13}\text{C NMR}$  (100 MHz,  $\text{CDCl}_3$ )  $\delta$  196.1, 147.0, 146.1, 145.4, 142.9, 139.4, 132.7, 130.7 (q,  $J = 32.0$  Hz), 127.6, 124.2 (q,  $J = 270.0$  Hz), 123.7, 122.3, 122.2 (q,  $J = 4.0$  Hz), 117.2 (q,  $J = 4.0$  Hz), 72.5, 50.6, 43.4, 36.1, 30.0;  $^{19}\text{F NMR}$  (376 MHz,  $\text{CDCl}_3$ )  $\delta$  -62.3; IR (neat): 2923, 2908, 2849, 2029, 1959, 1668(s), 1333, 1233, 619, 525; HRESIMS Calcd for  $[\text{C}_{25}\text{H}_{23}\text{F}_3\text{NaOS}]^+$  ( $\text{M} + \text{Na}^+$ ) 451.1314, found 451.1328.

**(S)-2'-(((3R,5R,7R)-adamantan-1-yl)thio)-5'-methylspiro[cyclohexane-1,1'-indene]-2,4-dien-6-one (2e)**

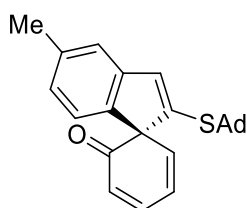

**2e**

Compound **2e** was prepared in 88% yield (32.9 mg) according to the general procedure (Table 2, entry 5). The product was purified by chromatography on silica gel (eluent: hexanes/acetone = 15/1) as a yellow oil.  $[\alpha]_D^{20} = +128.7^\circ$  ( $c = 1.0$ ,  $\text{CHCl}_3$ ). 97:3 e.r. (determined by HPLC: Chiralpak IA Column, 20/80 *i*-PrOH/hexane, 1.0 mL/min, 254nm; TR = 8.27 min (major), 10.02 min (minor)).  $^1\text{H NMR}$  (400 MHz,  $\text{CDCl}_3$ )  $\delta$

7.22 – 7.18 (m, 1H), 7.10 (s, 1H), 6.99 (s, 1H), 6.93 – 6.86 (m, 2H), 6.48 (dd,  $J = 8.8$ , 6.4 Hz, 1H), 6.20 (d,  $J = 10.0$  Hz, 1H), 5.94 (d,  $J = 9.2$  Hz, 1H), 2.33 (s, 3H), 2.06 – 1.96 (m, 9H), 1.70 – 1.66 (m, 6H);  $^{13}\text{C}$  NMR (100 MHz,  $\text{CDCl}_3$ )  $\delta$  197.3, 145.4, 142.7, 142.0, 141.0, 140.9, 138.0, 135.9, 127.4, 126.3, 122.8, 121.9, 121.5, 72.5, 50.2, 43.6, 36.1, 30.0, 21.5; IR (neat): 2912, 2851, 2029, 1959, 1669(s), 1540, 1539, 1039, 739, 729, 560; HRESIMS Calcd for  $[\text{C}_{25}\text{H}_{26}\text{NaOS}]^+$  ( $\text{M} + \text{Na}^+$ ) 397.1597, found 397.1597.

**(S)-2'-(((3R,5R,7R)-adamantan-1-yl)thio)-5'-methoxyspiro[cyclohexane-1,1'-indene]-2,4-dien-6-one (2f)**

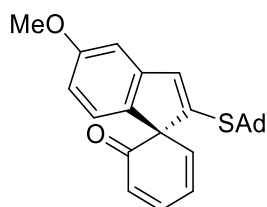

**2f**

Compound **2f** was prepared in 69% yield (26.9 mg) according to the general procedure (Table 2, entry 6). The product was purified by chromatography on silica gel (eluent: hexanes/acetone = 12/1) as a yellow oil.  $[\alpha]_{\text{D}}^{20} = +56.7^\circ$  ( $c = 1.0$ ,  $\text{CHCl}_3$ ). 92:8 e.r. (determined by HPLC: Chiralpak IA Column, 20/80 *i*-PrOH/hexane, 1.0 mL/min, 254nm; TR = 9.81 min (major), 11.63 min (minor)).  $^1\text{H}$  NMR (400 MHz,  $\text{CDCl}_3$ )  $\delta$  7.23 – 7.19 (m, 1H), 6.98 (s, 1H), 6.90 (d,  $J = 8.4$  Hz, 1H), 6.85 (s, 1H), 6.62 (d,  $J = 8.0$  Hz, 1H), 6.48 (dd,  $J = 9.2$ , 6.8 Hz, 1H), 6.21 (d,  $J = 10.0$  Hz, 1H), 5.95 (d,  $J = 9.2$  Hz, 1H), 3.80 (s, 3H), 2.07 – 1.98 (m, 9H), 1.71 – 1.68 (m, 6H);  $^{13}\text{C}$  NMR (100 MHz,  $\text{CDCl}_3$ )  $\delta$  197.4, 160.1, 146.8, 143.4, 142.7, 141.0, 135.7, 135.2, 127.4, 122.7(4), 122.7(1), 111.2, 106.5, 72.1, 55.5, 50.3, 43.4, 36.1, 30.1; IR (neat): 2905, 2849, 2029, 1959, 1666(s), 1464, 1226, 1039, 800, 586; HRESIMS Calcd for  $[\text{C}_{25}\text{H}_{26}\text{NaO}_2\text{S}]^+$  ( $\text{M} + \text{Na}^+$ ) 413.1546, found 413.1563.

**(S)-2'-(((3R,5R,7R)-adamantan-1-yl)thio)-5'-hydroxyspiro[cyclohexane-1,1'-indene]-2,4-dien-6-one (2g)**

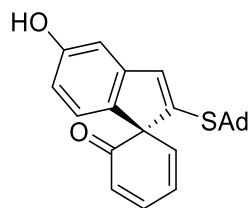

**2g**

Compound **2g** was prepared in 72% yield (27.1 mg) according to the general procedure (Table 2, entry 7). The product was purified by chromatography on silica gel (eluent: hexanes/acetone = 20/1) as a yellow oil.  $[\alpha]_D^{20} = +85.4^\circ$  ( $c = 1.0$ ,  $\text{CHCl}_3$ ). 64:36 e.r. (determined by HPLC: Chiralpak IC Column, 10/90 *i*-PrOH/hexane, 1.0 mL/min, 254nm; TR = 27.65 min (minor), 30.66 min (major)).  $^1\text{H NMR}$  (400 MHz,  $\text{CDCl}_3$ )  $\delta$  7.21 – 7.17 (m, 1H), 6.82 (s, 1H), 6.68 (d,  $J = 8.4$  Hz, 1H), 6.47 (d,  $J = 2.0$  Hz, 1H), 6.41 (dd,  $J = 9.2, 6.0$  Hz, 1H), 6.36 – 6.34 (m, 2H), 6.16 (d,  $J = 9.6$  Hz, 1H), 5.89 (d,  $J = 8.8$  Hz, 1H), 2.00 – 1.90 (m, 9H), 1.64 – 1.58 (m, 6H);  $^{13}\text{C NMR}$  (100 MHz,  $\text{CDCl}_3$ )  $\delta$  199.1, 156.6, 146.8, 143.9, 142.4, 141.8, 135.6, 134.5, 127.1, 122.6, 122.5, 112.6, 108.4, 72.1, 50.3, 43.5, 36.1, 30.0; IR (neat): 3240(bs), 2906, 2850, 2028, 1958, 1665(s), 1502, 1403, 1270, 883, 799, 693; HRESIMS Calcd for  $[\text{C}_{24}\text{H}_{24}\text{NaO}_2\text{S}]^+$  ( $\text{M} + \text{Na}^+$ ) 399.1389, found 399.1388.

**(S)-2'-(((3R,5R,7R)-adamantan-1-yl)thio)-6'-fluorospiro[cyclohexane-1,1'-indene]-2,4-dien-6-one (2h)**

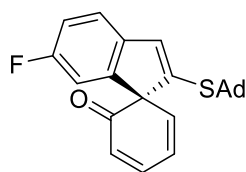

**2h**

Compound **2h** was prepared in 92% yield (34.8 mg) according to the general procedure (Table 2, entry 8). The product was purified by chromatography on silica gel (eluent: hexanes/acetone = 20/1) as a yellow solid (mp 185–186 °C).  $[\alpha]_D^{20} = -70.6^\circ$  ( $c = 1.0$ ,  $\text{CHCl}_3$ ). 90:10 e.r. (determined by HPLC: Chiralpak IA Column, 20/80 *i*-PrOH/hexane, 1.0 mL/min, 254nm; TR = 5.00 min (major), 7.94 min (minor)).  $^1\text{H NMR}$  (400 MHz,



CDCl<sub>3</sub>)  $\delta$  7.17 – 7.13 (m, 2H), 6.91 – 6.87 (m, 2H), 6.68 (dd,  $J$  = 8.4, 2.0 Hz, 1H), 6.45 (dd,  $J$  = 9.2, 6.0 Hz, 1H), 6.16 (d,  $J$  = 10.0 Hz, 1H), 5.86 (d,  $J$  = 9.2 Hz, 1H), 2.03 – 1.99 (m, 3H), 1.95 – 1.88 (m, 6H), 1.64 – 1.60 (m, 6H); <sup>13</sup>C NMR (100 MHz, CDCl<sub>3</sub>)  $\delta$  196.5, 161.3 (d,  $J$  = 245.0 Hz), 145.7 (d,  $J$  = 8.0 Hz), 142.8, 141.6 (d,  $J$  = 4.0 Hz), 141.2 (d,  $J$  = 3.0 Hz), 139.9, 135.2, 127.5, 123.4, 121.4 (d,  $J$  = 8.0 Hz), 115.0 (d,  $J$  = 22.0 Hz), 110.4 (d,  $J$  = 25.0 Hz), 72.7, 50.3, 43.6, 36.1, 30.1; <sup>19</sup>F NMR (376 MHz, CDCl<sub>3</sub>)  $\delta$  - 116.0; IR (neat): 2956, 2907, 2850, 2029, 1959, 1667(s), 1476, 1264, 1039, 784, 575; HRESIMS Calcd for [C<sub>24</sub>H<sub>23</sub>FNaOS]<sup>+</sup> (M + Na<sup>+</sup>) 401.1346, found 401.1356.

**(S)-2'-(((3R,5R,7R)-adamantan-1-yl)thio)-6'-chlorospiro[cyclohexane-1,1'-indene]-2,4-dien-6-one (2i)**

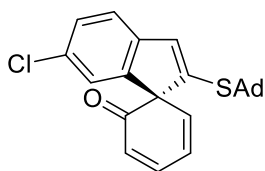

**2i**

Compound **2i** was prepared in 87% yield (34.6 mg) according to the general procedure (Table 2, entry 9). The product was purified by chromatography on silica gel (eluent: hexanes/acetone = 15/1) as a yellow oil.  $[\alpha]_D^{20} = +283.8^\circ$  (c = 1.0, CHCl<sub>3</sub>). 95.5:4.5 e.r. (determined by HPLC: Chiralpak IA Column, 20/80 *i*-PrOH/hexane, 1.0 mL/min, 254nm; TR = 5.08 min (major), 8.28 min (minor)). <sup>1</sup>H NMR (400 MHz, CDCl<sub>3</sub>)  $\delta$  7.24 – 7.17 (m, 3H), 6.98 (s, 1H), 6.96 (s, 1H), 6.52 (dd,  $J$  = 9.2, 6.4 Hz, 1H), 6.23 (d,  $J$  = 9.6 Hz, 1H), 5.93 (d,  $J$  = 9.2 Hz, 1H), 2.08 – 1.97 (m, 9H), 1.72 – 1.67 (m, 6H); <sup>13</sup>C NMR (100 MHz, CDCl<sub>3</sub>)  $\delta$  196.3, 145.1, 143.8, 143.1, 142.8, 139.7, 134.0, 131.1, 128.3, 127.5, 123.4, 122.8, 121.3, 72.5, 50.4, 43.5, 36.0, 30.0; IR (neat): 2918, 2852, 2028, 1959, 1668(s), 1452, 1262, 1037, 720, 627; HRESIMS Calcd for [C<sub>24</sub>H<sub>23</sub>ClNaOS]<sup>+</sup> (M + Na<sup>+</sup>) 417.1050, found 417.1071.

**(S)-2'-(((3R,5R,7R)-adamantan-1-yl)thio)-6'-methylspiro[cyclohexane-1,1'-indene]-2,4-dien-6-one (2j)**

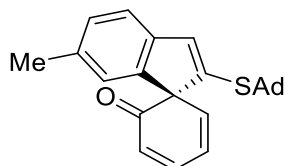

**2j**

Compound **2j** was prepared in 91% yield (34.0 mg) according to the general procedure (Table 2, entry 10). The product was purified by chromatography on silica gel (eluent: hexanes/acetone = 15/1) as a brown oil.  $[\alpha]_D^{20} = +268.9^\circ$  ( $c = 1.0$ ,  $\text{CHCl}_3$ ). 95.5:4.5 e.r. (determined by HPLC: Chiralpak IA Column, 20/80 *i*-PrOH/hexane, 1.0 mL/min, 254nm; TR = 4.93 min (major), 6.94 min (minor)).  $^1\text{H NMR}$  (400 MHz,  $\text{CDCl}_3$ )  $\delta$  7.25 – 7.20 (m, 1H), 7.17 (d,  $J = 7.6$  Hz, 1H), 7.06 (d,  $J = 7.6$  Hz, 1H), 7.01 (s, 1H), 6.83 (s, 1H), 6.49 (dd,  $J = 9.2, 6.0$  Hz, 1H), 6.22 (d,  $J = 10.0$  Hz, 1H), 5.95 (d,  $J = 9.2$  Hz, 1H), 2.28 (s, 3H), 2.09 – 2.04 (m, 3H), 2.02 – 1.96 (m, 6H), 1.70 – 1.67 (m, 6H);  $^{13}\text{C NMR}$  (100 MHz,  $\text{CDCl}_3$ )  $\delta$  197.4, 144.2, 142.8, 142.6, 141.0, 140.5, 136.5, 135.6, 128.9, 127.5, 123.1, 122.9, 120.5, 72.8, 50.1, 43.7, 36.1, 30.1, 21.4; IR (neat): 2904, 2847, 2361, 2029, 1959, 1667(s), 1456, 1297, 1039, 772, 595; HRESIMS Calcd for  $[\text{C}_{25}\text{H}_{26}\text{NaOS}]^+$  ( $\text{M} + \text{Na}^+$ ) 397.1597, found 397.1604.

**(S)-2'-(((3R,5R,7R)-adamantan-1-yl)thio)-6'-methoxyspiro[cyclohexane-1,1'-indene]-2,4-dien-6-one (2k)**

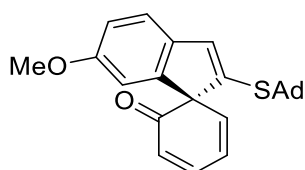

**2k**

Compound **2k** was prepared in 93% yield (36.3 mg) according to the general procedure (Table 2, entry 11). The product was purified by chromatography on silica gel (eluent: hexanes/acetone = 12/1) as a yellow oil.  $[\alpha]_D^{20} = +149.7^\circ$  ( $c = 1.0$ ,  $\text{CHCl}_3$ ). 90:10 e.r. (determined by HPLC: Chiralpak IA Column, 20/80 *i*-PrOH/hexane, 1.0 mL/min, 254nm; TR = 6.17 min (major), 10.66 min (minor)).  $^1\text{H NMR}$  (400 MHz,  $\text{CDCl}_3$ )  $\delta$  7.24 – 7.19 (m, 2H), 7.00 (s, 1H), 6.81 (dd,  $J = 8.4, 2.4$  Hz, 1H), 6.59 (d,  $J = 2.0$  Hz,

1H), 6.50 (dd,  $J = 9.2, 6.0$  Hz, 1H), 6.22 (d,  $J = 9.6$  Hz, 1H), 5.95 (d,  $J = 9.2$  Hz, 1H), 3.74 (s, 3H), 2.08 – 2.03 (m, 3H), 1.99 – 1.93 (m, 6H), 1.69 – 1.66 (m, 6H);  $^{13}\text{C}$  NMR (100 MHz,  $\text{CDCl}_3$ )  $\delta$  197.3, 158.4, 146.0, 142.8, 140.8, 138.5, 138.1, 137.4, 127.5, 123.0, 121.4, 113.6, 109.1, 72.9, 55.6, 50.1, 43.8, 36.1, 30.1; IR (neat): 2904, 2849, 1958, 1667(s), 1475, 1282, 1229, 1038, 772, 731, 543; HRESIMS Calcd for  $[\text{C}_{25}\text{H}_{26}\text{NaO}_2\text{S}]^+$  ( $\text{M} + \text{Na}^+$ ) 413.1546, found 413.1539.

**(S)-2'-(((3R,5R,7R)-adamantan-1-yl)thio)-4'-chlorospiro[cyclohexane-1,1'-indene]-2,4-dien-6-one (2l)**

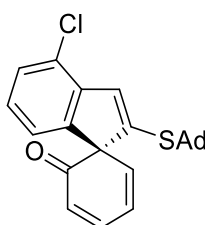

**2l**

Compound **2l** was prepared in 89% yield (35.2 mg) according to the general procedure (Table 2, entry 12). The product was purified by chromatography on silica gel (eluent: hexanes/acetone = 15/1) as a brown oil.  $[\alpha]_{\text{D}}^{20} = +181.8^\circ$  ( $c = 1.0, \text{CHCl}_3$ ). 80:20 e.r. (determined by HPLC: Chiralpak IC Column, 20/80 *i*-PrOH/hexane, 1.0 mL/min, 254nm; TR = 5.79 min (major), 6.70 min (minor)).  $^1\text{H}$  NMR (400 MHz,  $\text{CDCl}_3$ )  $\delta$  7.25 – 7.20 (m, 2H), 7.07 (s, 1H), 7.01 – 6.98 (m, 1H), 6.89 (d,  $J = 7.2$  Hz, 1H), 6.51 (dd,  $J = 9.2, 5.6$  Hz, 1H), 6.23 (d,  $J = 9.6$  Hz, 1H), 5.92 (d,  $J = 9.2$  Hz, 1H), 2.09 – 2.01 (m, 9H), 1.73 – 1.69 (m, 6H);  $^{13}\text{C}$  NMR (100 MHz,  $\text{CDCl}_3$ )  $\delta$  196.2, 144.9, 144.1, 143.7, 142.8, 139.7, 131.5, 128.5, 127.5, 126.5, 125.2, 123.3, 120.5, 73.3, 50.5, 43.4, 36.0, 30.0; IR (neat): 2907, 2850, 1959, 1668(s), 1450, 1298, 1039, 763, 730, 607; HRESIMS Calcd for  $[\text{C}_{24}\text{H}_{23}\text{ClNaOS}]^+$  ( $\text{M} + \text{Na}^+$ ) 417.1050, found 417.1060.

**(S)-2'-(((3R,5R,7R)-adamantan-1-yl)thio)-3-fluorospiro[cyclohexane-1,1'-indene]-2,4-dien-6-one (2m)**

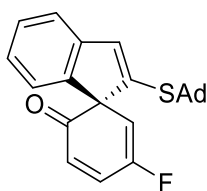

**2m**

Compound **2m** was prepared in 79% yield (29.9 mg) according to the general procedure (Table 2, entry 13). The product was purified by chromatography on silica gel (eluent: hexanes/acetone = 15/1) as a brown solid (mp 141–143 °C).  $[\alpha]_D^{20} = +87.3^\circ$  (c = 1.0, CHCl<sub>3</sub>). 95:5 e.r. (determined by HPLC: Chiralpak IA Column, 20/80 *i*-PrOH/hexane, 1.0 mL/min, 254nm; TR = 5.29 min (major), 6.74 min (minor)). <sup>1</sup>H NMR (400 MHz, CDCl<sub>3</sub>) δ 7.30 – 7.27 (m, 2H), 7.14 – 7.08 (m, 2H), 7.05 (d, *J* = 7.6 Hz, 1H), 7.00 (s, 1H), 6.23 (dd, *J* = 10.4, 4.4 Hz, 1H), 5.46 (dd, *J* = 9.6, 3.2 Hz, 1H), 2.10 – 2.06 (m, 3H), 2.01 – 1.96 (m, 6H), 1.71 – 1.68 (m, 6H); <sup>13</sup>C NMR (100 MHz, CDCl<sub>3</sub>) δ 195.6 (d, *J* = 1.0 Hz), 155.9 (d, *J* = 250.0 Hz), 144.9, 144.2 (d, *J* = 3.0 Hz), 142.5 (d, *J* = 3.0 Hz), 138.4 (d, *J* = 37.0 Hz), 135.6, 129.5 (d, *J* = 8.0 Hz), 128.5, 125.7, 122.3, 120.9, 114.2 (d, *J* = 19.0 Hz), 70.4 (d, *J* = 8.0 Hz), 50.4, 43.6, 36.1, 30.1; <sup>19</sup>F NMR (376 MHz, CDCl<sub>3</sub>) δ -115.3; IR (neat): 2909, 2850, 1958, 1649(s), 1462, 1403, 1298, 1219, 1039, 881, 740; HRESIMS Calcd for [C<sub>24</sub>H<sub>23</sub>FN<sub>1</sub>OS]<sup>+</sup> (M + Na<sup>+</sup>) 401.1346, found 401.1359.

**(*S*)-2'-(((3*R*,5*R*,7*R*)-adamantan-1-yl)thio)-3-chlorospiro[cyclohexane-1,1'-indene]-2,4-dien-6-one (2n)**

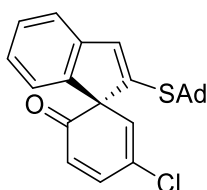

**2n**

Compound **2n** was prepared in 88% yield (31.5 mg) according to the general procedure (Table 2, entry 14). The product was purified by chromatography on silica gel (eluent: hexanes/acetone = 15/1) as a brown oil.  $[\alpha]_D^{20} = -7.8^\circ$  (c = 1.0, CHCl<sub>3</sub>). 91.5:8.5 e.r. (determined by HPLC: Chiralpak IA Column, 20/80 *i*-PrOH/hexane, 1.0 mL/min, 254nm; TR = 5.25 min (major), 6.49 min (minor)). <sup>1</sup>H NMR (400 MHz, CDCl<sub>3</sub>) δ 7.28

– 7.26 (m, 2H), 7.11 – 7.08 (m, 2H), 7.05 (d,  $J = 7.2$  Hz, 1H), 7.01 (s, 1H), 6.22 (d,  $J = 10.0$  Hz, 1H), 5.94 (d,  $J = 2.4$  Hz, 1H), 2.09 – 2.04 (m, 3H), 2.03 – 1.96 (m, 6H), 1.70 – 1.67 (m, 6H);  $^{13}\text{C}$  NMR (100 MHz,  $\text{CDCl}_3$ )  $\delta$  195.1, 144.9, 144.5, 143.4, 141.7, 136.2, 134.7, 128.7, 128.5, 127.7, 125.8, 122.4, 120.9, 72.8, 50.4, 43.6, 36.0, 30.0; IR (neat): 3062, 2930, 2852, 2029, 1958, 1668(s), 1452, 1298, 1219, 1039, 833, 749, 638; HRESIMS Calcd for  $[\text{C}_{24}\text{H}_{23}\text{ClNaOS}]^+$  ( $\text{M} + \text{Na}^+$ ) 417.1050, found 417.1052.

**(S)-2'-(((3R,5R,7R)-adamantan-1-yl)thio)-3-methylspiro[cyclohexane-1,1'-indene]-2,4-dien-6-one (2o)**

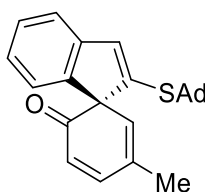

**2o**

Compound **2o** was prepared in 89% yield (33.3 mg) according to the general procedure (Table 2, entry 15). The product was purified by chromatography on silica gel (eluent: hexanes/acetone = 15/1) as a yellow oil.  $[\alpha]_{\text{D}}^{20} = +140.7^\circ$  ( $c = 1.0$ ,  $\text{CHCl}_3$ ). 92.5:7.5 e.r. (determined by HPLC: Chiralpak IA Column, 20/80 *i*-PrOH/hexane, 1.0 mL/min, 254nm; TR = 5.67 min (major), 6.69 min (minor)).  $^1\text{H}$  NMR (400 MHz,  $\text{CDCl}_3$ )  $\delta$  7.27 – 7.21 (m, 2H), 7.09 – 7.04 (m, 2H), 7.00 – 6.99 (m, 2H), 6.19 (d,  $J = 10.0$  Hz, 1H), 5.61 (s, 1H), 2.07 – 1.97 (m, 12H), 1.70 – 1.67 (m, 6H);  $^{13}\text{C}$  NMR (100 MHz,  $\text{CDCl}_3$ )  $\delta$  197.2, 147.1, 145.1, 144.4, 142.8, 134.9, 134.1, 130.7, 128.0, 127.1, 125.3, 122.1, 120.6, 72.1, 50.0, 43.5, 36.1, 30.0, 21.2; IR (neat): 3061, 2904, 2850, 2029, 1959, 1671(s), 1645, 1450, 1298, 1123, 1039, 824, 751, 738; HRESIMS Calcd for  $[\text{C}_{25}\text{H}_{26}\text{NaOS}]^+$  ( $\text{M} + \text{Na}^+$ ) 397.1597, found 397.1585.

**(1S)-2'-(((3S)-adamantan-1-yl)thio)-3-methoxyspiro[cyclohexane-1,1'-indene]-2,4-dien-6-one (2p)**

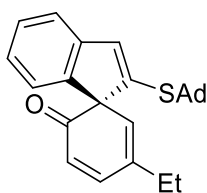

**2p**

Compound **2p** was prepared in 88% yield (34.2 mg) according to the general procedure (Table 2, entry 16). The product was purified by chromatography on silica gel (eluent: hexanes/acetone = 15/1) as a yellow oil.  $[\alpha]_D^{20} = +174.9^\circ$  ( $c = 1.0$ ,  $\text{CHCl}_3$ ). 97.5:2.5 e.r. (determined by HPLC: Chiralpak IA Column, 20/80 *i*-PrOH/hexane, 1.0 mL/min, 254nm; TR = 5.16 min (major), 6.27 min (minor)).  $^1\text{H}$  NMR (400 MHz,  $\text{CDCl}_3$ )  $\delta$  7.27 (d,  $J = 7.2$  Hz, 1H), 7.23 (d,  $J = 6.8$  Hz, 1H), 7.12 (dd,  $J = 10.0, 2.4$  Hz, 1H), 7.08 – 7.04 (m, 1H), 7.00 – 6.97 (m, 2H), 6.21 (d,  $J = 10.0$  Hz, 1H), 5.58 (s, 1H), 2.35 – 2.40 (m, 2H), 2.09 – 2.05 (m, 3H), 2.01 – 1.97 (m, 6H), 1.70 – 1.68 (m, 6H), 1.14 (t,  $J = 7.6$  Hz, 3H);  $^{13}\text{C}$  NMR (100 MHz,  $\text{CDCl}_3$ )  $\delta$  197.5, 146.5, 145.2, 144.6, 142.9, 136.6, 135.3, 132.8, 128.0, 127.3, 125.4, 122.2, 120.6, 72.1, 50.0, 43.7, 36.1, 30.1, 28.2, 12.9; IR (neat): 2964, 2903, 2849, 2029, 1959, 1761, 1668(s), 1452, 1298, 1204, 1193, 1038, 750, 737; HRESIMS Calcd for  $[\text{C}_{26}\text{H}_{28}\text{NaOS}]^+$  ( $\text{M} + \text{Na}^+$ ) 411.1753, found 411.1761.

**(1S)-2'-(((3S)-adamantan-1-ylthio)-4-chlorospiro[cyclohexane-1,1'-indene]-2,4-dien-6-one (2q)**

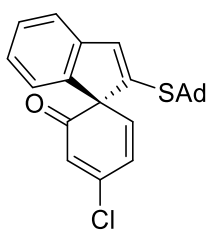

**2q**

Compound **2q** was prepared in 94% yield (37.1 mg) according to the general procedure (Table 2, entry 17). The product was purified by chromatography on silica gel (eluent: hexanes/acetone = 15/1) as a yellow solid (mp 189–191 °C).  $[\alpha]_D^{20} = +33.2^\circ$  ( $c = 1.0$ ,  $\text{CHCl}_3$ ). 90:10 e.r. (determined by HPLC: Chiralpak IA Column, 10/90 *i*-PrOH/hexane, 1.0 mL/min, 254nm; TR = 6.57 min (major), 7.78 min (minor)).  $^1\text{H}$  NMR (400 MHz,

CDCl<sub>3</sub>)  $\delta$  7.29 – 7.16 (m, 2H), 7.11 – 7.08 (m, 1H), 7.05 – 7.00 (m, 2H), 6.53 (d,  $J$  = 9.6 Hz, 1H), 6.42 (s, 1H), 5.98 (d,  $J$  = 9.6 Hz, 1H), 2.10 – 2.05 (m, 3H), 2.04 – 2.00 (m, 6H), 1.71 – 1.67 (m, 6H); <sup>13</sup>C NMR (100 MHz, CDCl<sub>3</sub>)  $\delta$  194.1, 152.4, 145.3, 143.4, 141.8, 141.3, 136.2, 128.5, 126.5, 125.7, 125.6, 122.4, 120.9, 71.6, 50.5, 43.6, 36.1, 30.1. IR (neat): 2905, 2850, 2029, 1959, 1662(s), 1558, 1456, 1284, 1039, 821, 673, 594; HRESIMS Calcd for [C<sub>24</sub>H<sub>23</sub>ClNaOS]<sup>+</sup> (M + Na<sup>+</sup>) 417.1050, found 417.1063.

**(1S)-2'-(((3S)-adamantan-1-yl)thio)-4-methylspiro[cyclohexane-1,1'-indene]-2,4-dien-6-one (2r)**

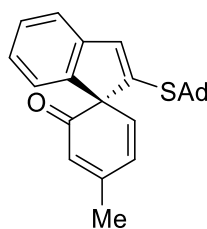

**2r**

Compound **2r** was prepared in 93% yield (34.8 mg) according to the general procedure (Table 2, entry 18). The product was purified by chromatography on silica gel (eluent: hexanes/acetone = 15/1) as a brown oil.  $[\alpha]_D^{20} = +111.2^\circ$  (c = 1.0, CHCl<sub>3</sub>). 91:9 e.r. (determined by HPLC: Chiralpak IA Column, 20/80 *i*-PrOH/hexane, 1.0 mL/min, 254nm; TR = 6.25 min (major), 7.45 min (minor)). <sup>1</sup>H NMR (400 MHz, CDCl<sub>3</sub>)  $\delta$  7.28 – 7.25 (m, 1H), 7.25 – 7.21 (m, 1H), 7.06 – 6.97 (m, 3H), 6.38 (d,  $J$  = 9.6 Hz, 1H), 6.09 (s, 1H), 5.91 (d,  $J$  = 9.2 Hz, 1H), 2.20 (s, 3H), 2.07 – 1.99 (m, 9H), 1.71 – 1.68 (m, 6H); <sup>13</sup>C NMR (100 MHz, CDCl<sub>3</sub>)  $\delta$  196.4, 155.1, 145.3, 144.1, 142.5, 139.7, 135.3, 128.1, 126.9, 125.3, 125.1, 122.1, 120.6, 71.5, 50.1, 43.6, 36.1, 30.1, 23.2; IR (neat): 2908, 2850, 2029, 1959, 1661(s), 1461, 1185, 1039, 773, 746, 613; HRESIMS Calcd for [C<sub>25</sub>H<sub>26</sub>NaOS]<sup>+</sup> (M + Na<sup>+</sup>) 397.1597, found 397.1607.

**(1S)-2'-(((3S)-adamantan-1-yl)thio)-4-methoxyspiro[cyclohexane-1,1'-indene]-2,4-dien-6-one (2s)**

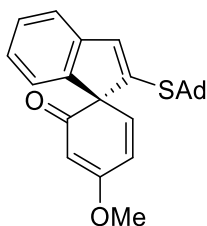

**2s**

Compound **2s** was prepared in 90% yield (35.1 mg) according to the general procedure (Table 2, entry 19). The product was purified by chromatography on silica gel (eluent: hexanes/acetone = 12/1) as a red oil.  $[\alpha]_D^{20} = +157.6^\circ$  ( $c = 1.0$ ,  $\text{CHCl}_3$ ). 90:10 e.r. (determined by HPLC: Chiralpak IA Column, 20/80 *i*-PrOH/hexane, 1.0 mL/min, 254nm; TR = 7.31 min (major), 10.76 min (minor)).  $^1\text{H}$  NMR (400 MHz,  $\text{CDCl}_3$ )  $\delta$  7.28 (d,  $J = 7.2$  Hz, 1H), 7.24 – 7.22 (m, 1H), 7.09 – 7.05 (m, 1H), 7.04 (s, 1H), 7.01 (d,  $J = 7.6$  Hz, 1H), 6.38 (dd,  $J = 10.0, 2.0$  Hz, 1H), 5.95 (d,  $J = 10.0$  Hz, 1H), 5.66 (d,  $J = 1.6$  Hz, 1H), 3.84 (s, 3H), 2.07 – 2.00 (m, 9H), 1.72 – 1.68 (m, 6H);  $^{13}\text{C}$  NMR (100 MHz,  $\text{CDCl}_3$ )  $\delta$  195.2, 172.5, 145.3, 144.3, 142.4, 141.4, 135.5, 128.1, 125.4, 123.2, 122.2, 120.6, 101.6, 71.1, 55.9, 50.1, 43.6, 36.1, 30.0; IR (neat): 3060, 2920, 2852, 1959, 1648(s), 1568, 1506, 1265, 1196, 1034, 929, 921, 895, 564; HRESIMS Calcd for  $[\text{C}_{25}\text{H}_{26}\text{NaO}_2\text{S}]^+$  ( $\text{M} + \text{Na}^+$ ) 413.1546, found 413.1550.

**(1S)-2'-(((3S)-adamantan-1-yl)thio)-5-chlorospiro[cyclohexane-1,1'-indene]-2,4-dien-6-one (2t)**

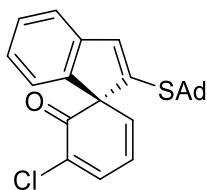

**2t**

Compound **2t** was prepared in 71% yield (28.0 mg) according to the general procedure (Table 2, entry 20). The product was purified by chromatography on silica gel (eluent: hexanes/acetone = 15/1) as a yellow solid (mp 166–170 °C).  $[\alpha]_D^{20} = +217.7^\circ$  ( $c = 1.0$ ,  $\text{CHCl}_3$ ). 97:3 e.r. (determined by HPLC: Chiralpak IA Column, 20/80 *i*-PrOH/hexane, 1.0 mL/min, 254nm; TR = 10.29 min (major), 11.53 min (minor)).  $^1\text{H}$  NMR (400 MHz,



CDCl<sub>3</sub>)  $\delta$  7.37 (d,  $J$  = 6.8 Hz, 1H), 7.29 – 7.24 (m, 2H), 7.10 – 7.06 (m, 1H), 7.02 (s, 1H), 7.00 (d,  $J$  = 7.6 Hz, 1H), 6.41 (dd,  $J$  = 9.2, 6.8 Hz, 1H), 5.88 (d,  $J$  = 9.2 Hz, 1H), 2.10 – 2.04 (m, 3H), 2.02 – 1.95 (m, 6H), 1.72 – 1.66 (m, 6H); <sup>13</sup>C NMR (100 MHz, CDCl<sub>3</sub>)  $\delta$  189.7, 145.1, 143.0, 141.3, 140.1, 139.5, 136.3, 132.0, 128.4, 125.7, 122.7, 122.2, 120.8, 73.9, 50.5, 43.6, 35.9, 30.0; IR (neat): 2905, 2848, 2029, 1959, 1679(s), 1632, 1461, 1450, 1328, 1038, 781, 635; HRESIMS Calcd for [C<sub>24</sub>H<sub>23</sub>ClNaOS]<sup>+</sup> (M + Na<sup>+</sup>) 417.1050, found 417.1055.

**(1S)-2'-(((3S)-adamantan-1-yl)thio)-5-methylspiro[cyclohexane-1,1'-indene]-2,4-dien-6-one (2u)**

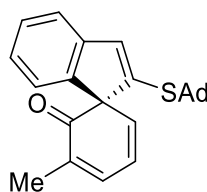

**2u**

Compound **2u** was prepared in 93% yield (34.7 mg) according to the general procedure (Table 2, entry 21). The product was purified by chromatography on silica gel (eluent: hexanes/acetone = 15/1) as a yellow oil.  $[\alpha]_D^{20} = +220.1^\circ$  ( $c = 1.0$ , CHCl<sub>3</sub>). 96:4 e.r. (determined by HPLC: Chiralpak IA Column, 10/90 *i*-PrOH/hexane, 1.0 mL/min, 254nm; TR = 6.66 min (major), 7.58 min (minor)). <sup>1</sup>H NMR (400 MHz, CDCl<sub>3</sub>)  $\delta$  7.28 – 7.21 (m, 2H), 7.07 – 7.04 (m, 1H), 7.01 – 6.98 (m, 3H), 6.42 (dd,  $J$  = 9.2, 6.0 Hz, 1H), 5.84 (d,  $J$  = 9.2, 1H), 2.10 – 2.05 (m, 3H), 2.04 – 1.97 (m, 6H), 1.92 (s, 3H), 1.71 – 1.68 (m, 6H); <sup>13</sup>C NMR (100 MHz, CDCl<sub>3</sub>)  $\delta$  197.1, 145.3, 144.2, 142.4, 139.0, 138.0, 135.3, 135.1, 128.0, 125.4, 123.3, 122.0, 120.6, 72.6, 50.1, 43.6, 36.1, 30.1, 16.0; IR (neat): 2916, 2851, 2029, 1959, 1661(s), 1644, 1455, 1298, 776, 738, 577; HRESIMS Calcd for [C<sub>25</sub>H<sub>26</sub>NaOS]<sup>+</sup> (M + Na<sup>+</sup>) 397.1597, found 397.1598.

**(S)-2'-(((1s,3R,5R,7S)-3-methyladamantan-1-yl)thio)spiro[cyclohexane-1,1'-indene]-2,4-dien-6-one (2v)**

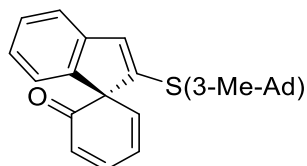

**2v**

Compound **2v** was prepared in 83% yield (31.0 mg) according to the general procedure (Table 3, entry 1). The product was purified by chromatography on silica gel (eluent: hexanes/acetone = 15/1) as a yellow oil.  $[\alpha]_D^{20} = +91.2^\circ$  ( $c = 1.0$ ,  $\text{CHCl}_3$ ). 95.5:3.5 e.r. (determined by HPLC: Chiralpak IA Column, 5/95 *i*-PrOH/hexane, 1.0 mL/min, 254nm; TR = 10.12 min (major), 12.49 min (minor)).  $^1\text{H NMR}$  (400 MHz,  $\text{CDCl}_3$ )  $\delta$  7.30 – 7.27 (m, 1H), 7.25 – 7.20 (m, 2H), 7.09 – 7.05 (m, 1H), 7.02 – 7.01 (m, 2H), 6.49 (dd,  $J = 9.2, 6.0$  Hz, 1H), 6.22 (d,  $J = 9.6$  Hz, 1H), 5.95 (d,  $J = 9.2$  Hz, 1H), 2.13 – 2.08 (m, 2H), 1.98 – 1.85 (m, 4H), 1.75 – 1.69 (m, 2H), 1.65 – 1.54 (m, 2H), 1.45 – 1.40 (m, 4H), 0.84 (s, 3H);  $^{13}\text{C NMR}$  (100 MHz,  $\text{CDCl}_3$ )  $\delta$  197.0, 145.3, 143.7, 142.7, 142.2, 140.7, 135.3, 128.2, 127.5, 125.4, 123.0, 122.1, 120.7, 72.8, 50.6, 50.2, 43.1, 42.8, 42.7, 35.3, 32.4, 30.6, 30.3(9), 30.3(8); IR (neat): 2904, 2845, 2333, 2029, 1959, 1668(s), 1631, 1455, 1308, 989, 744, 689; HRESIMS Calcd for  $[\text{C}_{25}\text{H}_{26}\text{NaOS}]^+$  ( $\text{M} + \text{Na}^+$ ) 397.1597, found 397.1610.

**(S)-2'-(((3R,5R,7R)-3,5,7-trimethyladamantan-1-yl)thio)spiro[cyclohexane-1,1'-indene]-2,4-dien-6-one (2w)**

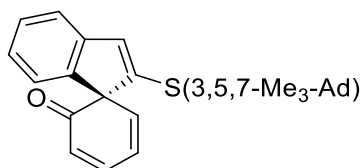

**2w**

Compound **2w** was prepared in 88% yield (35.3 mg) according to the general procedure (Table 3, entry 2). The product was purified by chromatography on silica gel (eluent: hexanes/acetone = 15/1) as a brown oil.  $[\alpha]_D^{20} = +81.4^\circ$  ( $c = 1.0$ ,  $\text{CHCl}_3$ ). 95.5:4.5 e.r. (determined by HPLC: Chiralpak IC Column, 5/95 *i*-PrOH/hexane, 1.0 mL/min, 254nm; TR = 16.89 min (major), 18.08 min (minor)).  $^1\text{H NMR}$  (400 MHz,  $\text{CDCl}_3$ )  $\delta$  7.30 – 7.19

(m, 3H), 7.08 – 7.04 (m, 1H), 7.00 (d,  $J = 7.6$  Hz, 1H), 6.97 (s, 1H), 6.48 (dd,  $J = 9.2$ , 6.4 Hz, 1H), 6.21 (d,  $J = 9.6$  Hz, 1H), 5.94 (d,  $J = 8.8$  Hz, 1H), 1.61 – 1.54 (m, 6H), 1.14 – 1.04 (m, 6H), 0.86 (s, 9H);  $^{13}\text{C}$  NMR (100 MHz,  $\text{CDCl}_3$ )  $\delta$  197.0, 145.3, 143.6, 142.7, 142.4, 140.8, 134.7, 128.2, 127.4, 125.4, 122.9, 122.1, 120.6, 72.7, 51.2, 49.7, 48.8, 33.5, 29.8; IR (neat): 2945, 2920, 2836, 2029, 1959, 1668(s), 1456, 1334, 1249, 748, 599; HRESIMS Calcd for  $[\text{C}_{27}\text{H}_{30}\text{NaOS}]^+$  ( $\text{M} + \text{Na}^+$ ) 425.1910, found 425.1883.

**(S)-2'-(((1R,3S,5S,7S)-adamantan-2-yl)thio)spiro[cyclohexane-1,1'-indene]-2,4-dien-6-one (2x)**

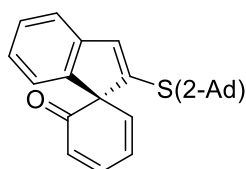

**2x**

Compound **2x** was prepared in 89% yield (32.0 mg) according to the general procedure (Table 3, entry 3). The product was purified by chromatography on silica gel (eluent: hexanes/acetone = 15/1) as a yellow oil.  $[\alpha]_{\text{D}}^{20} = +127.5^\circ$  ( $c = 1.0$ ,  $\text{CHCl}_3$ ). 90:10 e.r. (determined by HPLC: Chiralpak IA Column, 20/80 *i*-PrOH/hexane, 1.0 mL/min, 254nm; TR = 7.71 min (major), 8.65 min (minor)).  $^1\text{H}$  NMR (400 MHz,  $\text{CDCl}_3$ )  $\delta$  7.26 – 7.23 (m, 1H), 7.22 – 7.20 (m, 2H), 7.01 – 7.00 (m, 2H), 6.64 (s, 1H), 6.50 (dd,  $J = 9.2$ , 6.0 Hz, 1H), 6.23 (d,  $J = 9.6$  Hz, 1H), 6.01 (dd,  $J = 9.6$ , 1.2 Hz, 1H), 3.68 – 3.63 (m, 1H), 2.15 – 2.02 (m, 4H), 1.96 – 1.82 (m, 6H), 1.76 – 1.72 (m, 2H), 1.60 – 1.57 (m, 2H);  $^{13}\text{C}$  NMR (100 MHz,  $\text{CDCl}_3$ )  $\delta$  196.7, 147.2, 145.2, 143.1, 142.6, 141.3, 128.2, 127.3, 127.2, 124.5, 122.6, 121.8, 119.9, 71.5, 54.1, 38.6, 38.5, 37.5, 32.8, 32.6, 32.3, 32.2, 27.5, 27.3; IR (neat): 3065, 2908, 2851, 2029, 1959, 1667(s), 1593, 1203, 933, 774, 753, 690, 531; HRESIMS Calcd for  $[\text{C}_{24}\text{H}_{24}\text{NaOS}]^+$  ( $\text{M} + \text{Na}^+$ ) 383.1440, found 383.1443.

**(S)-2'-(tert-butylthio)spiro[cyclohexane-1,1'-indene]-2,4-dien-6-one (2y)**

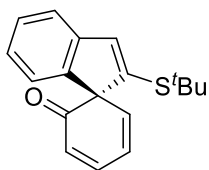

**2y**

Compound **2y** was prepared in 77% yield (21.7 mg) according to the general procedure (Table 3, entry 4). The product was purified by chromatography on silica gel (eluent: hexanes/acetone = 12/1) as a yellow oil.  $[\alpha]_{\text{D}}^{20} = +153.7^{\circ}$  ( $c = 1.0$ ,  $\text{CHCl}_3$ ). 86:14 e.r. (determined by HPLC: Chiralpak IC Column, 20/80 *i*-PrOH/hexane, 1.0 mL/min, 254nm; TR = 7.66 min (major), 10.76 min (minor)).  $^1\text{H}$  NMR (400 MHz,  $\text{CDCl}_3$ )  $\delta$  7.21 – 7.13 (m, 3H), 7.00 – 6.93 (m, 2H), 6.89 (s, 1H), 6.42 (dd,  $J = 9.2, 6.0$  Hz, 1H), 6.15 (d,  $J = 10.0$  Hz, 1H), 5.90 (d,  $J = 9.2$  Hz, 1H), 1.40 (s, 9H);  $^{13}\text{C}$  NMR (100 MHz,  $\text{CDCl}_3$ )  $\delta$  197.0, 145.4, 144.3, 143.4, 142.7, 140.9, 133.2, 128.2, 127.4, 125.3, 122.8, 122.1, 120.5, 72.6, 47.4, 31.1; IR (neat): 2961, 2924, 2029, 1959, 1667(s), 1489, 1456, 1196, 952, 751, 526; HRESIMS Calcd for  $[\text{C}_{18}\text{H}_{18}\text{NaOS}]^+$  ( $\text{M} + \text{Na}^+$ ) 305.0971, found 305.0981.

**(S)-2'-(isopropylthio)spiro[cyclohexane-1,1'-indene]-2,4-dien-6-one (2z)**

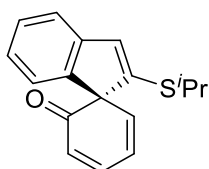

**2z**

Compound **2z** was prepared in 92% yield (24.7 mg) according to the general procedure (Table 3, entry 5). The product was purified by chromatography on silica gel (eluent: hexanes/acetone = 15/1) as a yellow oil.  $[\alpha]_{\text{D}}^{20} = +114.4^{\circ}$  ( $c = 1.0$ ,  $\text{CHCl}_3$ ). 85:15 e.r. (determined by HPLC: Chiralpak IA Column, 20/80 *i*-PrOH/hexane, 1.0 mL/min, 254nm; TR = 5.40 min (minor), 10.45 min (major)).  $^1\text{H}$  NMR (400 MHz,  $\text{CDCl}_3$ )  $\delta$  7.25 – 7.19 (m, 3H), 7.04 – 7.00 (m, 2H), 6.69 (s, 1H), 6.48 (dd,  $J = 9.2, 6.0$  Hz, 1H), 6.21 (d,  $J = 10.0$  Hz, 1H), 5.99 (dd,  $J = 9.2, 0.8$  Hz, 1H), 3.49 – 3.39 (m, 1H), 1.38 (d,  $J = 2.8$  Hz, 3H), 1.36 (d,  $J = 2.8$  Hz, 3H);  $^{13}\text{C}$  NMR (100 MHz,  $\text{CDCl}_3$ )  $\delta$  196.7, 146.3,

145.1, 143.2, 142.7, 141.0, 128.3, 128.2, 127.2, 124.7, 122.6, 121.8, 120.0, 71.3, 36.9, 22.8, 22.6; IR (neat): 2962, 2823, 2029, 1959, 1667(s), 1629, 1462, 1243, 748, 735, 689; HRESIMS Calcd for  $[C_{17}H_{16}NaOS]^+$  ( $M + Na^+$ ) 291.0814, found 291.0802.

**(S)-2'-(cyclohexylthio)spiro[cyclohexane-1,1'-indene]-2,4-dien-6-one (2aa)**

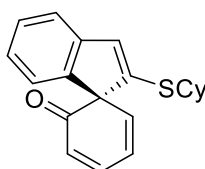

**2aa**

Compound **2aa** was prepared in 90% yield (27.7 mg) according to the general procedure (Table 3, entry 6). The product was purified by chromatography on silica gel (eluent: hexanes/acetone = 20/1) as a brown oil.  $[\alpha]_D^{20} = +179.8^\circ$  ( $c = 1.0$ ,  $CHCl_3$ ). 90:10 e.r. (determined by HPLC: Chiralpak IA Column, 20/80 *i*-PrOH/hexane, 1.0 mL/min, 254nm; TR = 9.00 min (major), 10.50 min (minor)).  $^1H$  NMR (400 MHz,  $CDCl_3$ )  $\delta$  7.23 – 7.20 (m, 3H), 7.02 – 6.99 (m, 2H), 6.69 (s, 1H), 6.49 (dd,  $J = 9.2, 6.0$  Hz, 1H), 6.22 (d,  $J = 9.6$  Hz, 1H), 5.99 (d,  $J = 9.2$  Hz, 1H), 3.25 – 3.20 (m, 1H), 2.11 – 2.08 (m, 2H), 1.78 – 1.76 (m, 2H), 1.66 – 1.58 (m, 2H), 1.51 – 1.30 (m, 4H);  $^{13}C$  NMR (100 MHz,  $CDCl_3$ )  $\delta$  196.7, 146.1, 145.2, 143.3, 142.7, 141.1, 128.2, 128.1, 127.2, 124.7, 122.7, 121.9, 120.0, 71.5, 45.3, 33.0, 32.7, 25.8, 25.7; IR (neat): 2930, 2851, 2029, 1959, 1668(s), 1632, 1461, 1450, 1243, 748, 687; HRESIMS Calcd for  $[C_{20}H_{20}NaOS]^+$  ( $M + Na^+$ ) 331.1127, found 331.1134.

**(S)-2'-(benzylthio)spiro[cyclohexane-1,1'-indene]-2,4-dien-6-one (2ab)**

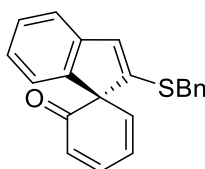

**2ab**

Compound **2ab** was prepared in 87% yield (27.5 mg) according to the general procedure (Table 3, entry 7). The product was purified by chromatography on silica gel

(eluent: hexanes/acetone = 10/1) as a yellow oil.  $[\alpha]_D^{20} = +151.5^\circ$  ( $c = 1.0$ ,  $\text{CHCl}_3$ ). 91.5:8.5 e.r. (determined by HPLC: Chiralpak IA Column, 30/70 *i*-PrOH/hexane, 1.0 mL/min, 254nm; TR = 7.14 min (minor), 19.58 min (major)).  $^1\text{H}$  NMR (400 MHz,  $\text{CDCl}_3$ )  $\delta$  7.31 – 7.29 (m, 2H), 7.25 – 7.22 (m, 2H), 7.20 – 7.12 (m, 4H), 6.98 – 6.93 (m, 2H), 6.60 (s, 1H), 6.41 (dd,  $J = 9.2, 6.0$  Hz, 1H), 6.16 (d,  $J = 9.6$  Hz, 1H), 5.92 (d,  $J = 9.2$  Hz, 1H), 4.06 (dd,  $J = 16.8, 12.8$  Hz, 2H);  $^{13}\text{C}$  NMR (100 MHz,  $\text{CDCl}_3$ )  $\delta$  196.7, 146.6, 144.9, 143.2, 142.8, 141.0, 135.9, 128.9, 128.6, 128.3, 128.0, 127.5, 127.2, 124.9, 122.8, 121.9, 120.2, 71.3, 37.5; IR (neat): 2932, 2029, 1959, 1667(s), 1489, 1196, 1023, 950, 751, 688; HRESIMS Calcd for  $[\text{C}_{21}\text{H}_{16}\text{NaOS}]^+$  ( $\text{M} + \text{Na}^+$ ) 339.0814, found 339.0821.

**(*S*)-2'-(phenylthio)spiro[cyclohexane-1,1'-indene]-2,4-dien-6-one (2ac)**

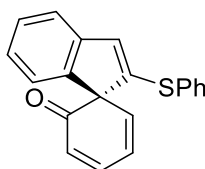

**2ac**

Compound **2ac** was prepared in 85% yield (25.7 mg) according to the general procedure (Table 3, entry 8). The product was purified by chromatography on silica gel (eluent: hexanes/acetone = 15/1) as a yellow oil.  $[\alpha]_D^{20} = +136.2^\circ$  ( $c = 1.0$ ,  $\text{CHCl}_3$ ). 82:18 e.r. (determined by HPLC: Chiralpak IC Column, 20/80 *i*-PrOH/hexane, 1.0 mL/min, 254nm; TR = 9.76 min (major), 12.18 min (minor)).  $^1\text{H}$  NMR (400 MHz,  $\text{CDCl}_3$ )  $\delta$  7.56 – 7.54 (m, 2H), 7.34 – 7.33 (m, 3H), 7.23 – 7.15 (m, 3H), 7.06 – 7.00 (m, 2H), 6.57 (s, 1H), 6.42 (dd,  $J = 9.2, 6.0$  Hz, 1H), 6.20 (d,  $J = 10.0$  Hz, 1H), 6.00 (d,  $J = 9.2$  Hz, 1H);  $^{13}\text{C}$  NMR (100 MHz,  $\text{CDCl}_3$ )  $\delta$  196.4, 146.9, 144.5, 143.9, 142.6, 140.5, 134.1, 131.7, 131.5, 129.2, 128.7, 128.3, 127.4, 125.2, 122.7, 122.0, 120.7, 71.2; IR (neat): 2029, 1959, 1662(s), 1629, 1433, 746, 688, 626, 587; HRESIMS Calcd for  $[\text{C}_{20}\text{H}_{14}\text{NaOS}]^+$  ( $\text{M} + \text{Na}^+$ ) 325.0658, found 325.0658.

#### 4. Synthetic Utility Study

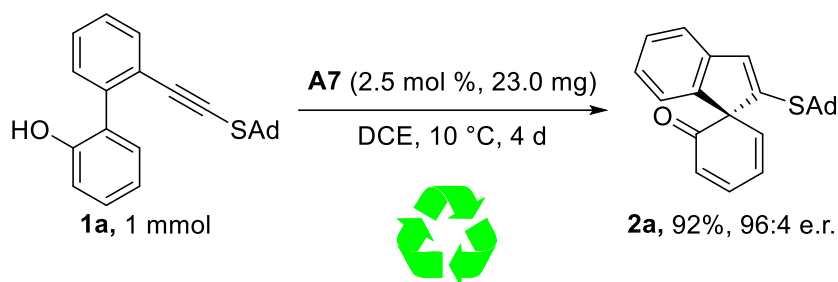

20.7 mg of **A7** was recycled

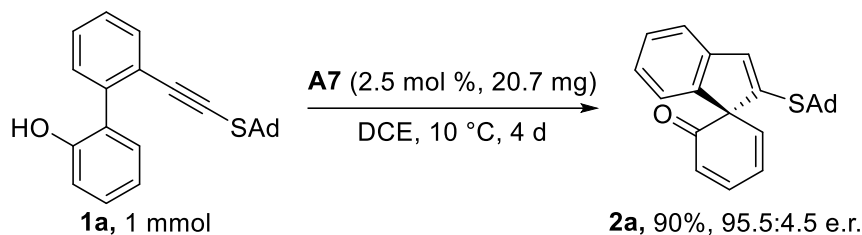

#### Catalyst recycling experiment:

To a mixture of alkynyl thioether **1a** (1 mmol, 360.5 mg) in DCE (10 mL) was added **A7** (0.025 mmol, 23.0 mg) at 10 °C. Then, the reaction mixture was stirred at 10 °C and the progress of the reaction was monitored by TLC. Upon completion, the mixture was quenched by Et<sub>3</sub>N (0.06 mmol, 8.4 μL), concentrated under reduced pressure. The residue was purified by chromatography on silica gel (eluent: hexanes/ ethyl acetate) to give **2a** in 92% yield (331.6 mg) with 96:4 e.r. value, as well as recycled **A7**. The above-obtained **A7** was washed with 6 M HCl and brine, dried over MgSO<sub>4</sub> and filtered. The filtrate was concentrated under reduced pressure to deliver **A7** (20.7 mg) which could be used in next 1 mmol reaction and delivered **2a** in similar yield and enantioselectivity. This experiment shows that the CPA catalyst could be recycled well.

#### (1*S*,6*S*)-2'-(((3*S*)-adamantan-1-yl)thio)spiro[cyclohexane-1,1'-indene]-2,4-dien-6-ol (**3**)

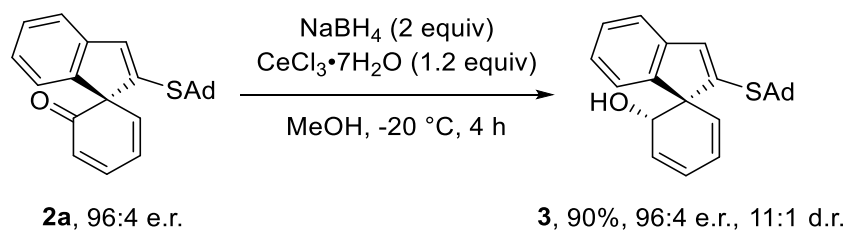

To a solution of **2a** (0.1 mmol, 36.0 mg) in MeOH (1.5 mL) was added CeCl<sub>3</sub>·7H<sub>2</sub>O

(0.12 mmol, 44.6 mg). The resulting mixture was stirred at -20 °C for 5 min before NaBH<sub>4</sub> (0.2 mmol, 7.6 mg) was added. Then the reaction was stirred at -20 °C for additional 4 h and the progress of the reaction was monitored by TLC. Upon completion, the mixture was diluted with water, extracted EtOAc, washed with aqueous NaHCO<sub>3</sub> and brine, dried over anhydrous MgSO<sub>4</sub>, filtered and concentrated. The residue was purified by chromatography on silica gel (eluent: hexanes/ethyl acetate) to give the desired product **3** in 90% yield (32.6 mg) with the d.r. of 11:1. Pale yellow oil. [ $\alpha$ ]<sub>D</sub><sup>20</sup> = -5.0° (c = 1.0, CHCl<sub>3</sub>). 96:4 e.r. (determined by HPLC: Chiralpak IA Column, 20/80 *i*-PrOH/hexane, 1.0 mL/min, 254nm; TR = 8.67 min (minor), 13.24 min (major)). <sup>1</sup>H NMR (400 MHz, CDCl<sub>3</sub>)  $\delta$  7.34 (d, *J* = 7.6 Hz, 1H), 7.22 – 7.19 (m, 2H), 7.12 – 7.08 (m, 1H), 6.77 (s, 1H), 6.20 (dd, *J* = 9.2, 5.2 Hz, 1H), 6.07 – 6.03 (m, 1H), 5.99 – 5.95 (m, 1H), 5.34 (d, *J* = 9.6 Hz, 1H), 4.71 (s, 1H), 2.12 (s, 1H), 2.10 – 2.05 (m, 9H), 1.73 – 1.70 (m, 6H); <sup>13</sup>C NMR (100 MHz, CDCl<sub>3</sub>)  $\delta$  149.2, 143.8, 143.7, 131.0, 129.8, 129.3, 127.6, 125.0, 124.8, 124.1, 122.5, 119.6, 72.3, 63.0, 49.6, 43.3, 36.2, 30.0; IR (neat): 3431(bs), 2904, 2850, 2029, 1959, 1463, 1298, 1040, 745; HRESIMS Calcd for [C<sub>24</sub>H<sub>26</sub>NaOS]<sup>+</sup> (M + Na<sup>+</sup>) 385.1597, found 385.1598.

**(1*S*,6*R*)-2'-(((3*S*)-adamantan-1-yl)thio)spiro[cyclohexane-1,1'-inden]-2-en-6-ol (4)**

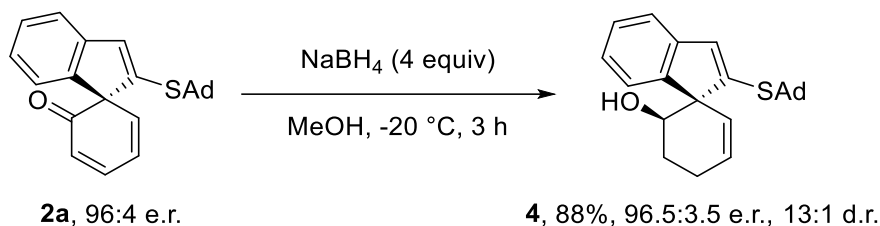

To a solution of **2a** (0.1 mmol, 36.0 mg) in MeOH (1.0 mL) was added NaBH<sub>4</sub> (0.4 mmol, 15.2 mg) at -20 °C and stirred at this temperature for 3 h. The progress of the reaction was monitored by TLC. Upon completion, the reaction was quenched with water (0.5 mL), extracted with EtOAc, washed with aqueous NaHCO<sub>3</sub> and brine, dried over anhydrous MgSO<sub>4</sub>, filtered and concentrated. The residue was purified by chromatography on silica gel (eluent: hexanes/ethyl acetate) to give the desired product **4** in 88% yield (32.1 mg) with the d.r. of 13:1. Colourless oil. [ $\alpha$ ]<sub>D</sub><sup>20</sup> = -127.4° (c = 1.0, CHCl<sub>3</sub>). 96.5:3.5 e.r. (determined by HPLC: Chiralpak IA Column, 20/80 *i*-



PrOH/hexane, 1.0 mL/min, 254nm; TR = 6.01 min (major), 11.48 min (minor)). <sup>1</sup>H NMR (400 MHz, CDCl<sub>3</sub>) δ 7.21 – 7.19 (m, 3H), 7.13 – 7.08 (m, 1H), 6.86 (s, 1H), 6.04 – 6.00 (m, 1H), 5.04 (d, *J* = 10.0 Hz, 1H), 4.10 (d, *J* = 10.4 Hz, 1H), 2.55 – 2.25 (m, 3H), 2.10 – 2.07 (m, 9H), 1.99 – 1.93 (m, 1H), 1.75 – 1.72 (m, 6H); <sup>13</sup>C NMR (100 MHz, CDCl<sub>3</sub>) δ 149.8, 144.4, 143.5, 131.7, 129.5, 127.3, 127.2, 124.7, 122.2, 119.6, 73.5, 63.7, 50.2, 43.5, 36.2, 30.0, 27.2, 24.2; IR (neat): 3465(bs), 2906, 2850, 2029, 1959, 1452, 1341, 1297, 1056, 1039, 749, 733, 711; HRESIMS Calcd for [C<sub>24</sub>H<sub>28</sub>NaOS]<sup>+</sup> (M + Na<sup>+</sup>) 387.1753, found 387.1751.

**(1*R*,6*R*)-2'-(*p*-tolyl)spiro[cyclohexane-1,1'-inden]-2-en-6-ol (5)**

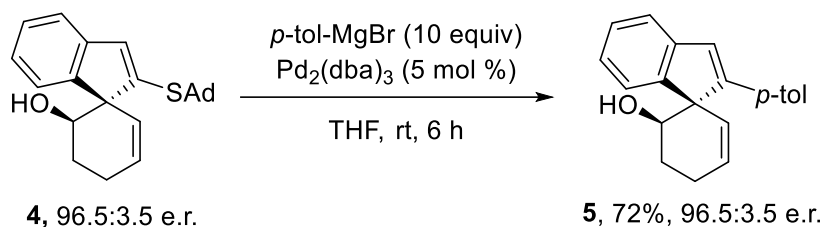

To a dry sealed tube equipped with a stir bar were added **4** (0.1 mmol, 36.4 mg), Pd<sub>2</sub>(dba)<sub>3</sub> (0.005 mmol, 4.6 mg) and THF (1.5 mL). Then *p*-tol-MgBr (1 mmol, 1.0 mol/L in THF, 1.0 mL) was added dropwise at room temperature and the resulting mixture was stirred under N<sub>2</sub> atmosphere for 6 h. The progress of the reaction was monitored by TLC. Upon completion, the reaction was quenched with water (0.5 mL) and concentrated under reduced pressure. The residue was purified by chromatography on silica gel (eluent: hexanes/ethyl acetate) to give the desired product **5** in 72% yield (20.7 mg). Colourless oil. [α]<sub>D</sub><sup>20</sup> = -100.5° (c = 1.0, CHCl<sub>3</sub>). 96.5:3.5 e.r. (determined by HPLC: Chiralpak IA Column, 20/80 *i*-PrOH/hexane, 1.0 mL/min, 254nm; TR = 5.66 min (minor), 6.93 min (major)). <sup>1</sup>H NMR (400 MHz, CDCl<sub>3</sub>) δ 7.49 (d, *J* = 8.0 Hz, 2H), 7.33 – 7.26 (m, 3H), 7.20 (dd, *J* = 7.2, 1.2 Hz, 1H), 7.15 – 7.13 (m, 2H), 6.85 (s, 1H), 6.12 – 6.08 (m, 1H), 5.44 – 5.41 (m, 1H), 4.19 (dd, *J* = 11.2, 4.0 Hz, 1H), 2.36 (s, 3H), 1.80 – 1.72 (m, 2H), 1.64 – 1.54 (m, 2H), 1.41 (s, 1H); <sup>13</sup>C NMR (100 MHz, CDCl<sub>3</sub>) δ 151.3, 150.7, 143.6, 137.3, 136.1, 131.2, 129.5, 128.9, 128.1, 127.5, 127.5, 125.5, 122.6, 120.9, 73.9, 62.5, 26.5, 24.4, 21.2; IR (neat): 3440(bs), 3012, 1633, 1514, 1464, 1265, 819, 750, 510; HRESIMS Calcd for [C<sub>21</sub>H<sub>20</sub>NaO]<sup>+</sup> (M + Na<sup>+</sup>) 311.1406, found

311.1413.

**(S)-2'-(((3R,5R,7R)-adamantan-1-yl)thio)spiro[cyclohexane-1,1'-inden]-2-one (6)**

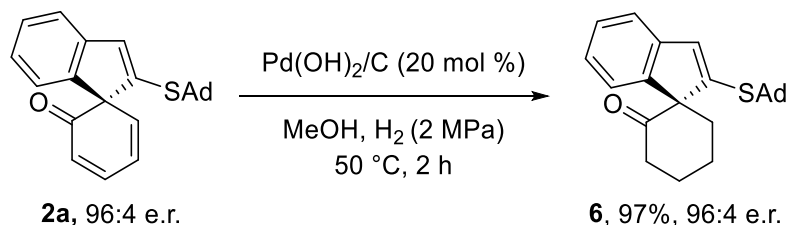

To a solution of **2a** (0.1 mmol, 36.0 mg) in MeOH (1 mL) was added Pd(OH)<sub>2</sub>/C (10% on carbon, 0.02 mmol, 3 mg) and stirred at 50 °C under H<sub>2</sub> atmosphere (2 MPa) for 2 h. The progress of the reaction was monitored by TLC. Upon completion, the mixture was concentrated under vacuum and the residue was purified by chromatography on silica gel (eluent: hexanes/ethyl acetate = 10/1) to afford the desired product **6** (35.3 mg, 97% yield). Colourless oil.  $[\alpha]_D^{20} = -96.7^\circ$  (c = 1.0, CHCl<sub>3</sub>). 96:4 e.r. (determined by HPLC: Chiralpak IA Column, 20/80 *i*-PrOH/hexane, 1.0 mL/min, 254nm; TR = 6.33 min (major), 9.26 min (minor)). <sup>1</sup>H NMR (400 MHz, CDCl<sub>3</sub>) δ 7.60 (d, *J* = 7.6 Hz, 1H), 7.27 – 7.20 (m, 2H), 7.15 – 7.10 (m, 1H), 6.90 (s, 1H), 2.85 – 2.76 (m, 1H), 2.70 – 2.65 (m, 1H), 2.58 – 2.51 (m, 1H), 2.25 – 2.15 (m, 2H), 2.07 – 1.95 (m, 12H), 1.72 – 1.69 (m, 6H); <sup>13</sup>C NMR (100 MHz, CDCl<sub>3</sub>) δ 207.4, 146.4, 146.1, 143.3, 133.5, 127.6, 124.3, 123.0, 120.9, 71.8, 50.0, 43.9, 40.7, 36.2, 35.9, 30.1, 25.9, 21.6; IR (neat): 2916, 2850, 2029, 1959, 1667(s), 1539, 1260, 1034, 807, 588, 542; HRESIMS Calcd for [C<sub>24</sub>H<sub>28</sub>NaOS]<sup>+</sup> (M + Na<sup>+</sup>) 387.1753, found 387.1759.

**(S)-2'-(((3R,5R,7R)-adamantan-1-yl)sulfonyl)spiro[cyclohexane-1,1'-indene]-2,4-dien-6-one (7)**

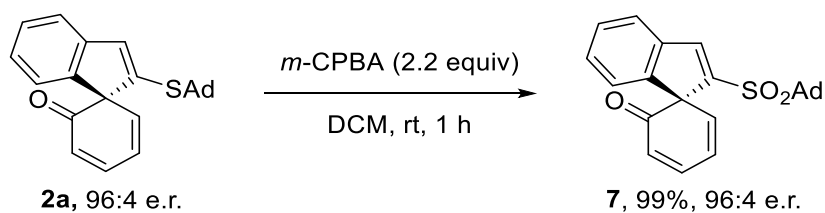

To a solution of **2a** (0.1 mmol, 36.1 mg) in DCM (2 mL) was added *m*-CPBA (0.22 mmol, 38.0 mg) and the resulting mixture was stirred at room temperature for 1 h. The

progress of the reaction was monitored by TLC. Upon completion, the reaction was quenched with saturated aqueous NaHCO<sub>3</sub> (0.1 mL), and directly concentrated under vacuum. The residue was purified by chromatography on silica gel (eluent: hexanes/ethyl acetate = 5/1) to afford the desired product **7** (39.0 mg, 99% yield). Colourless oil.  $[\alpha]_D^{20} = +41.3^\circ$  (c = 1.0, CHCl<sub>3</sub>). 96:4 e.r. (determined by HPLC: Chiralpak IA Column, 30/70 *i*-PrOH/hexane, 1.0 mL/min, 254nm; TR = 13.14 min (major), 24.42 min (minor)). <sup>1</sup>H NMR (400 MHz, CDCl<sub>3</sub>) δ 7.78 (s, 1H), 7.54 (d, *J* = 7.2, 1H), 7.39 – 7.35 (m, 1H), 7.32 – 7.26 (m, 2H), 7.13 (d, *J* = 7.6 Hz, 1H), 6.56 – 6.52 (m, 1H), 6.30 (d, *J* = 10.0 Hz, 1H), 6.13 (d, *J* = 9.2 Hz, 1H), 2.20 – 2.14 (m, 3H), 2.08 – 2.00 (m, 6H), 1.73 – 1.66 (m, 6H); <sup>13</sup>C NMR (100 MHz, CDCl<sub>3</sub>) δ 193.7, 148.0, 145.4, 145.3, 142.9, 141.1, 138.9, 129.4, 128.7, 127.4, 124.8, 122.4, 122.2, 69.7, 62.7, 35.7, 34.7, 28.3; IR (neat): 2917, 2855, 2029, 1959, 1669(s), 1453, 1299, 1135, 756, 627, 546; HRESIMS Calcd for [C<sub>24</sub>H<sub>24</sub>NaO<sub>3</sub>S]<sup>+</sup> (M + Na<sup>+</sup>) 415.1338, found 415.1326.

**(*S*)-2'-(((3*R*,5*R*,7*R*)-adamantan-1-yl)sulfonyl)spiro[cyclohexane-1,1'-indene]-2,4-dien-6-one (**8**)**

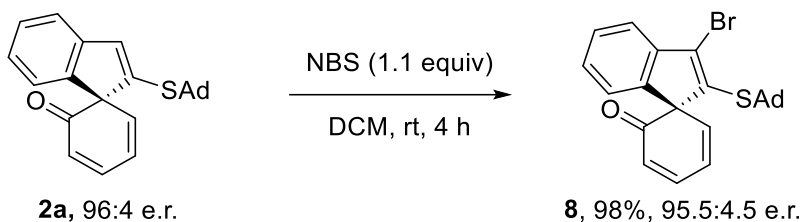

To a solution of **2a** (0.1 mmol, 36.1 mg) in DCM (2 mL) was added NBS (0.11 mmol, 19.0 mg) and the resulting mixture was stirred at room temperature for 4 h. The progress of the reaction was monitored by TLC. Upon completion, the reaction concentrated under vacuum, and the residue was purified by chromatography on silica gel (eluent: hexanes/ethyl acetate = 10/1) to afford the desired product **8** (43.0 mg, 98% yield). Yellow solid (mp 128–130 °C).  $[\alpha]_D^{20} = +142.8^\circ$  (c = 1.0, CHCl<sub>3</sub>). 95.5:4.5 e.r. (determined by HPLC: Chiralpak IA Column, 20/80 *i*-PrOH/hexane, 1.0 mL/min, 254nm; TR = 4.58 min (major), 4.96 min (minor)). <sup>1</sup>H NMR (400 MHz, CDCl<sub>3</sub>) δ 7.46 (d, *J* = 7.6 Hz, 1H), 7.40 – 7.37 (m, 1H), 7.30 – 7.20 (m, 2H), 7.04 (d, *J* = 7.6 Hz, 1H), 6.55 (dd, *J* = 9.2, 6.0 Hz, 1H), 6.25 (d, *J* = 9.6 Hz, 1H), 5.92 (d, *J* = 9.2 Hz, 1H), 2.02

–1.95 (m, 9H), 1.66 – 1.61 (m, 6H);  $^{13}\text{C}$  NMR (100 MHz,  $\text{CDCl}_3$ )  $\delta$  196.6, 144.1, 143.3, 142.8, 139.9, 139.1, 137.5, 128.6, 128.3, 127.7, 123.5, 122.3, 122.2, 72.7, 54.3, 45.0, 35.9, 30.5; IR (neat): 2906, 2849, 2029, 1959, 1704(s), 1648, 1463, 1221, 1038, 722, 570; HRESIMS Calcd for  $[\text{C}_{24}\text{H}_{23}\text{BrNaOS}]^+$  ( $\text{M} + \text{Na}^+$ ) 461.0545, found 461.0545.

## 5. References

1. É. Godin, J. Santandrea, A. Caron and S. K. Collins, *Org. Lett.*, 2020, **22**, 5905.
2. Y.-Q. Zhang, Y.-B. Chen, J.-R. Liu, S.-Q. Wu, X.-Y. Fan, Z.-X. Zhang, X. Hong and L.-W. Ye, *Nat. Chem.*, 2021, **13**, 1093.

## 6. Crystal data of compound 8 (CCDC Number = 2289404)

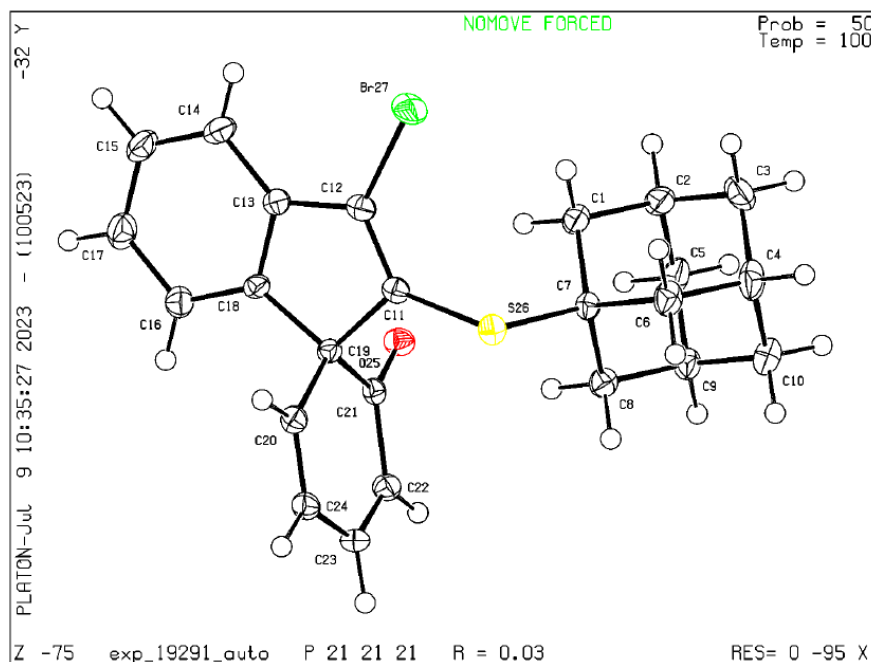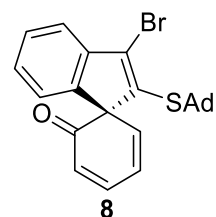

Bond precision: C-C = 0.0044 Å

Wavelength=1.54184

Cell: a=6.8294 (1) b=14.2435 (2) c=20.7154 (2)  
alpha=90 beta=90 gamma=90

Temperature: 100 K

|                        | Calculated                             | Reported                               |
|------------------------|----------------------------------------|----------------------------------------|
| Volume                 | 2015.08 (5)                            | 2015.08 (5)                            |
| Space group            | P 21 21 21                             | P 21 21 21                             |
| Hall group             | P 2ac 2ab                              | P 2ac 2ab                              |
| Moiety formula         | C <sub>24</sub> H <sub>23</sub> Br O S | C <sub>24</sub> H <sub>23</sub> Br O S |
| Sum formula            | C <sub>24</sub> H <sub>23</sub> Br O S | C <sub>24</sub> H <sub>23</sub> Br O S |
| Mr                     | 439.38                                 | 439.39                                 |
| Dx, g cm <sup>-3</sup> | 1.448                                  | 1.448                                  |
| Z                      | 4                                      | 4                                      |
| Mu (mm <sup>-1</sup> ) | 3.821                                  | 3.821                                  |
| F000                   | 904.0                                  | 904.0                                  |
| F000'                  | 904.49                                 |                                        |
| h, k, lmax             | 8, 17, 25                              | 8, 17, 25                              |
| Nref                   | 4125 [ 2376]                           | 4078                                   |
| Tmin, Tmax             | 0.963, 0.963                           | 0.456, 1.000                           |
| Tmin'                  | 0.963                                  |                                        |

Correction method= # Reported T Limits: Tmin=0.456 Tmax=1.000  
AbsCorr = MULTI-SCAN

Data completeness= 1.72/0.99

Theta(max)= 74.402

R(reflections)= 0.0258 ( 3892)

wR2(reflections)=  
0.0655 ( 4078)

S = 1.038

Npar= 244

## 7. HPLC Chromatograms

Compound **2a**: HPLC (IA, *n*-hexane/2-propanol = 80/20,  $v = 1.0$  mL/min,  $\lambda = 254$  nm)

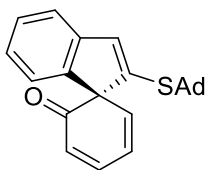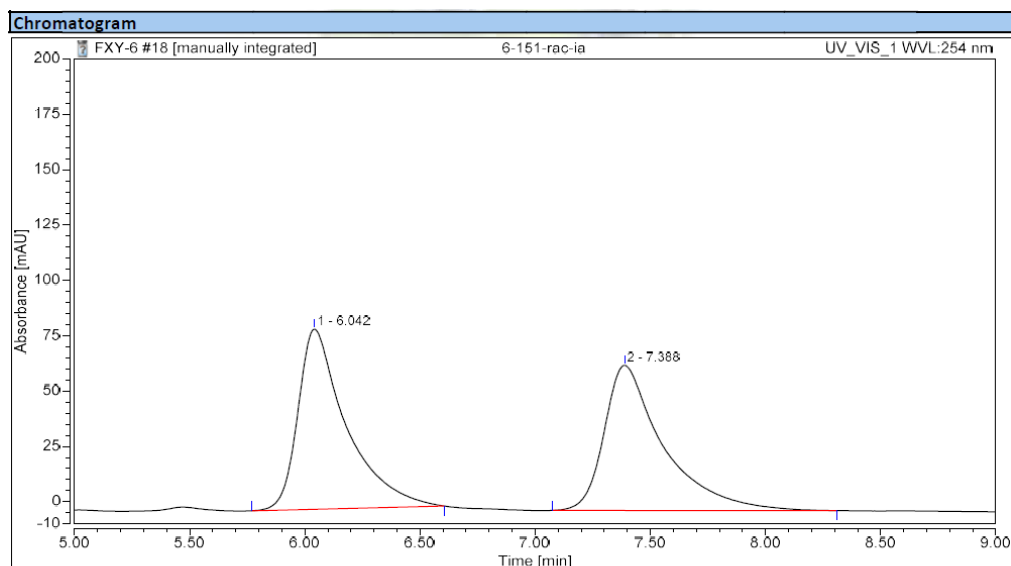

**Integration Results**

| No.           | Peak Name | Retention Time min | Area mAU*min  | Height mAU     | Relative Area % | Relative Height % | Amount |
|---------------|-----------|--------------------|---------------|----------------|-----------------|-------------------|--------|
| 1             |           | 6.042              | 19.761        | 81.361         | 50.41           | 55.39             | n.a.   |
| 2             |           | 7.388              | 19.439        | 65.537         | 49.59           | 44.61             | n.a.   |
| <b>Total:</b> |           |                    | <b>39.200</b> | <b>146.898</b> | <b>100.00</b>   | <b>100.00</b>     |        |

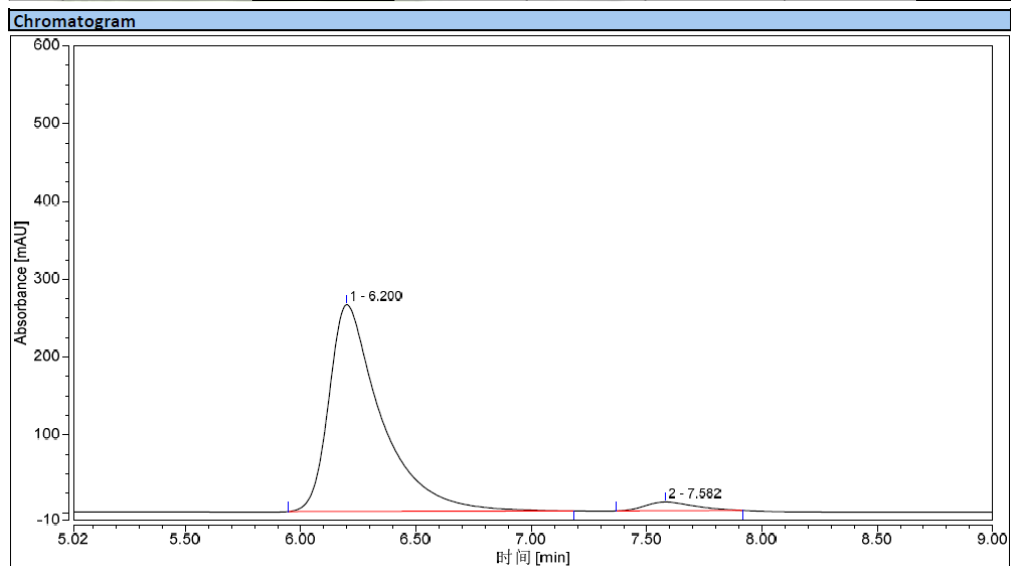

**Integration Results**

| No.           | Peak Name | Retention Time min | Area mAU*min  | Height mAU     | Relative Area % | Relative Height % | Amount |
|---------------|-----------|--------------------|---------------|----------------|-----------------|-------------------|--------|
| 1             |           | 6.200              | 69.830        | 265.738        | 96.16           | 95.91             | n.a.   |
| 2             |           | 7.582              | 2.785         | 11.325         | 3.84            | 4.09              | n.a.   |
| <b>Total:</b> |           |                    | <b>72.615</b> | <b>277.064</b> | <b>100.00</b>   | <b>100.00</b>     |        |

Compound **2b**: HPLC (IA, *n*-hexane/2-propanol = 80/20,  $v = 1.0$  mL/min,  $\lambda = 254$  nm)

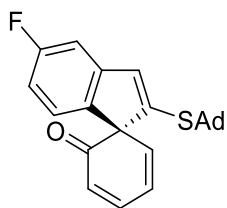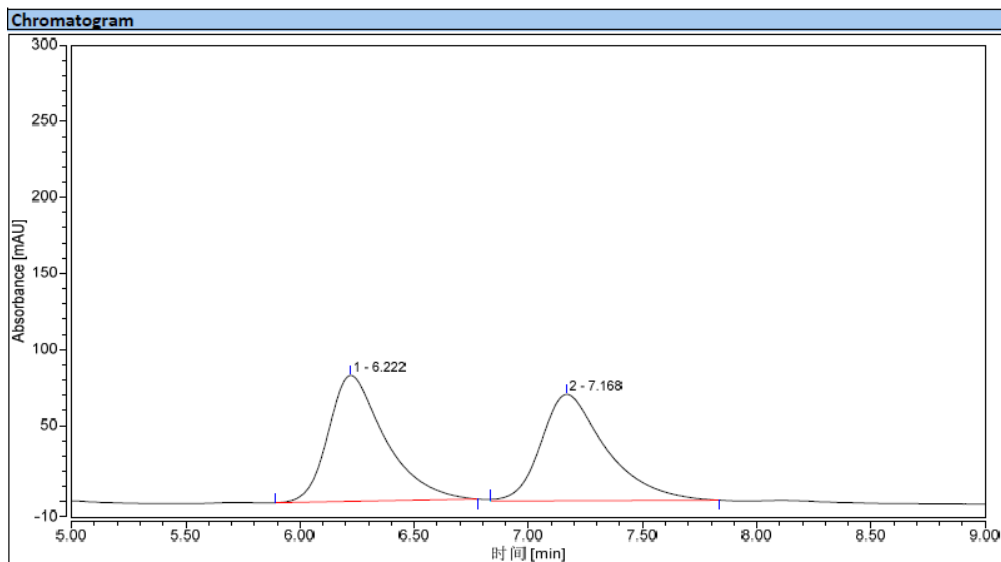

**Integration Results**

| No.           | Peak Name | Retention Time min | Area mAU*min  | Height mAU     | Relative Area % | Relative Height % | Amount |
|---------------|-----------|--------------------|---------------|----------------|-----------------|-------------------|--------|
| 1             |           | 6.222              | 23.868        | 82.760         | 50.81           | 54.21             | n.a.   |
| 2             |           | 7.168              | 23.104        | 69.918         | 49.19           | 45.79             | n.a.   |
| <b>Total:</b> |           |                    | <b>46.972</b> | <b>152.678</b> | <b>100.00</b>   | <b>100.00</b>     |        |

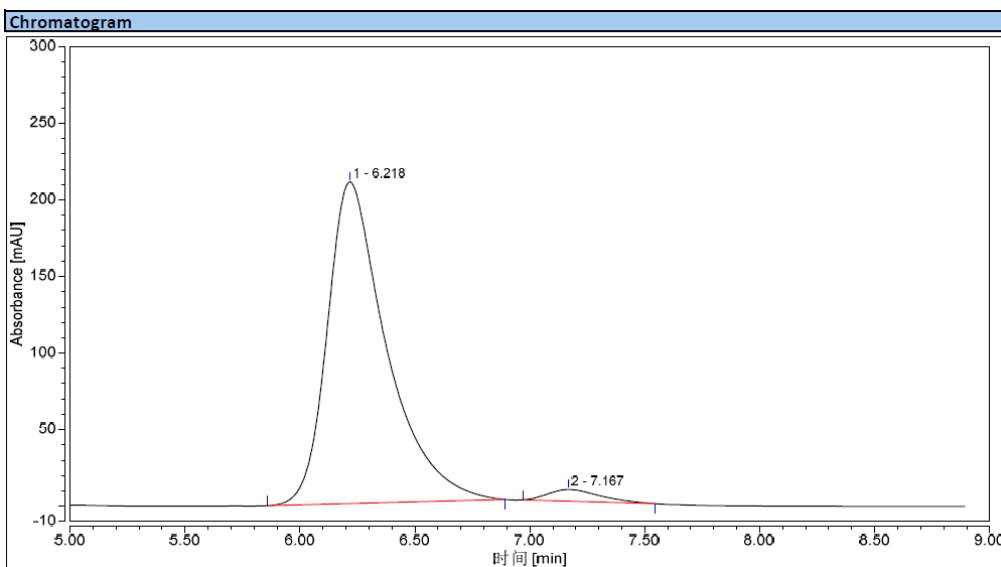

**Integration Results**

| No.           | Peak Name | Retention Time min | Area mAU*min  | Height mAU     | Relative Area % | Relative Height % | Amount |
|---------------|-----------|--------------------|---------------|----------------|-----------------|-------------------|--------|
| 1             |           | 6.218              | 62.689        | 210.065        | 96.92           | 96.52             | n.a.   |
| 2             |           | 7.167              | 1.990         | 7.572          | 3.08            | 3.48              | n.a.   |
| <b>Total:</b> |           |                    | <b>64.678</b> | <b>217.637</b> | <b>100.00</b>   | <b>100.00</b>     |        |

Compound **2c**: HPLC (IC, *n*-hexane/2-propanol = 80/20,  $v = 1.0$  mL/min,  $\lambda = 254$  nm)

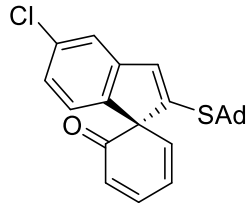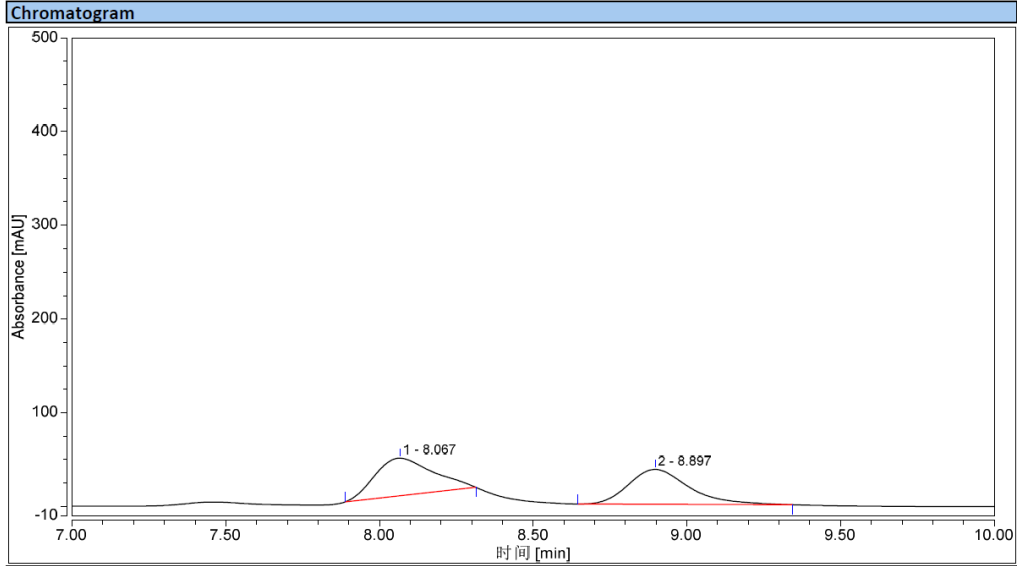

**Integration Results**

| No.           | Peak Name | Retention Time<br>min | Area<br>mAU*min | Height<br>mAU | Relative Area<br>% | Relative Height<br>% | Amount<br>n.a. |
|---------------|-----------|-----------------------|-----------------|---------------|--------------------|----------------------|----------------|
| 1             |           | 8.067                 | 8.759           | 40.084        | 50.73              | 51.89                | n.a.           |
| 2             |           | 8.897                 | 8.506           | 37.171        | 49.27              | 48.11                | n.a.           |
| <b>Total:</b> |           |                       | <b>17.264</b>   | <b>77.255</b> | <b>100.00</b>      | <b>100.00</b>        |                |

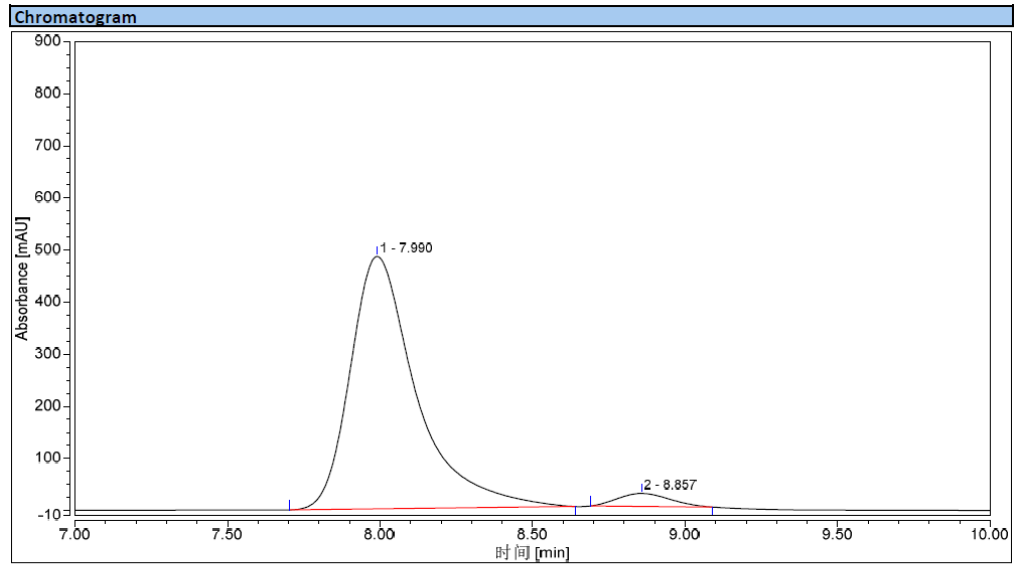

**Integration Results**

| No.           | Peak Name | Retention Time<br>min | Area<br>mAU*min | Height<br>mAU  | Relative Area<br>% | Relative Height<br>% | Amount<br>n.a. |
|---------------|-----------|-----------------------|-----------------|----------------|--------------------|----------------------|----------------|
| 1             |           | 7.990                 | 121.552         | 484.711        | 96.10              | 95.12                | n.a.           |
| 2             |           | 8.857                 | 4.936           | 24.854         | 3.90               | 4.88                 | n.a.           |
| <b>Total:</b> |           |                       | <b>126.488</b>  | <b>509.565</b> | <b>100.00</b>      | <b>100.00</b>        |                |



Compound **2d**: HPLC (IA, *n*-hexane/2-propanol = 80/20,  $v = 1.0$  mL/min,  $\lambda = 254$  nm)

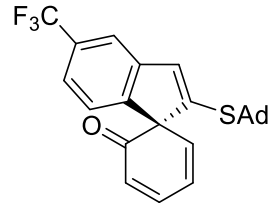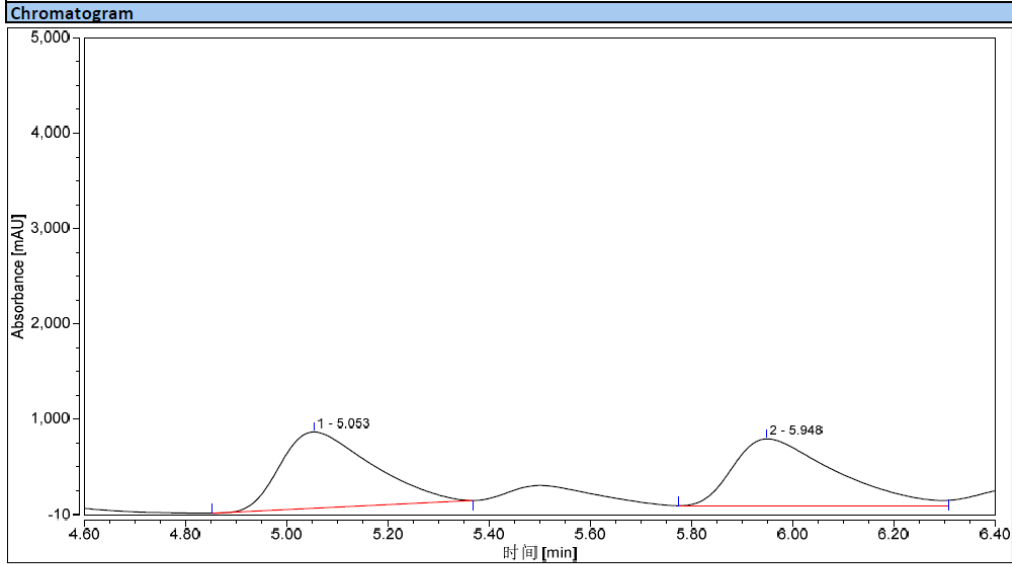

**Integration Results**

| No.           | Peak Name | Retention Time<br>min | Area<br>mAU*min | Height<br>mAU   | Relative Area<br>% | Relative Height<br>% | Amount<br>n.a. |
|---------------|-----------|-----------------------|-----------------|-----------------|--------------------|----------------------|----------------|
| 1             |           | 5.053                 | 166.860         | 800.166         | 50.30              | 53.29                | n.a.           |
| 2             |           | 5.948                 | 164.898         | 701.315         | 49.70              | 46.71                | n.a.           |
| <b>Total:</b> |           |                       | <b>331.757</b>  | <b>1501.481</b> | <b>100.00</b>      | <b>100.00</b>        |                |

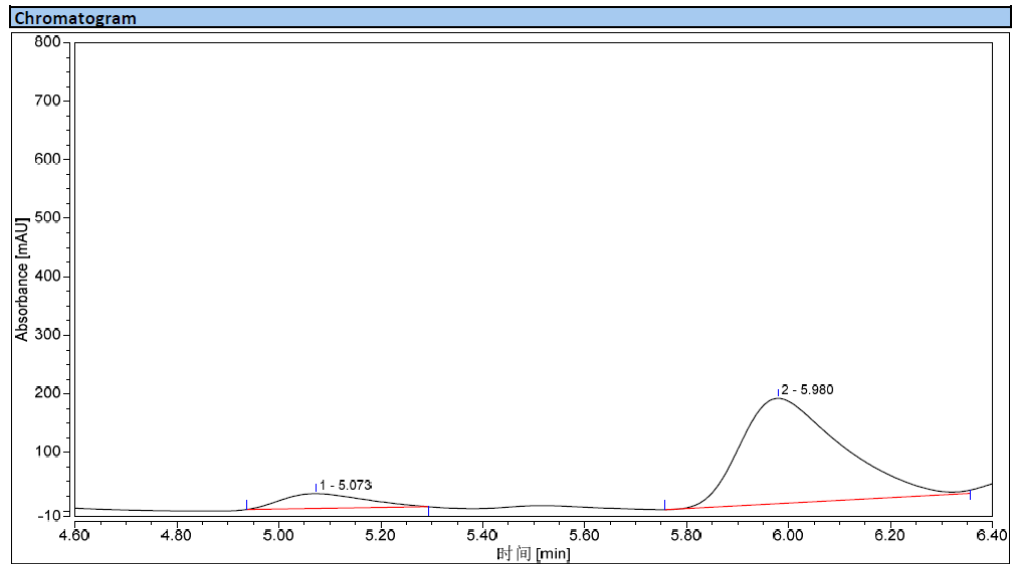

**Integration Results**

| No.           | Peak Name | Retention Time<br>min | Area<br>mAU*min | Height<br>mAU  | Relative Area<br>% | Relative Height<br>% | Amount<br>n.a. |
|---------------|-----------|-----------------------|-----------------|----------------|--------------------|----------------------|----------------|
| 1             |           | 5.073                 | 4.701           | 25.247         | 10.24              | 12.31                | n.a.           |
| 2             |           | 5.980                 | 41.194          | 179.761        | 89.76              | 87.69                | n.a.           |
| <b>Total:</b> |           |                       | <b>45.895</b>   | <b>205.007</b> | <b>100.00</b>      | <b>100.00</b>        |                |

Compound **2e**: HPLC (IA, *n*-hexane/2-propanol = 80/20,  $v = 1.0$  mL/min,  $\lambda = 254$  nm)

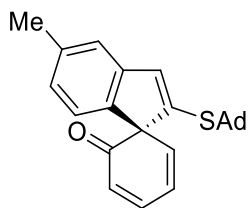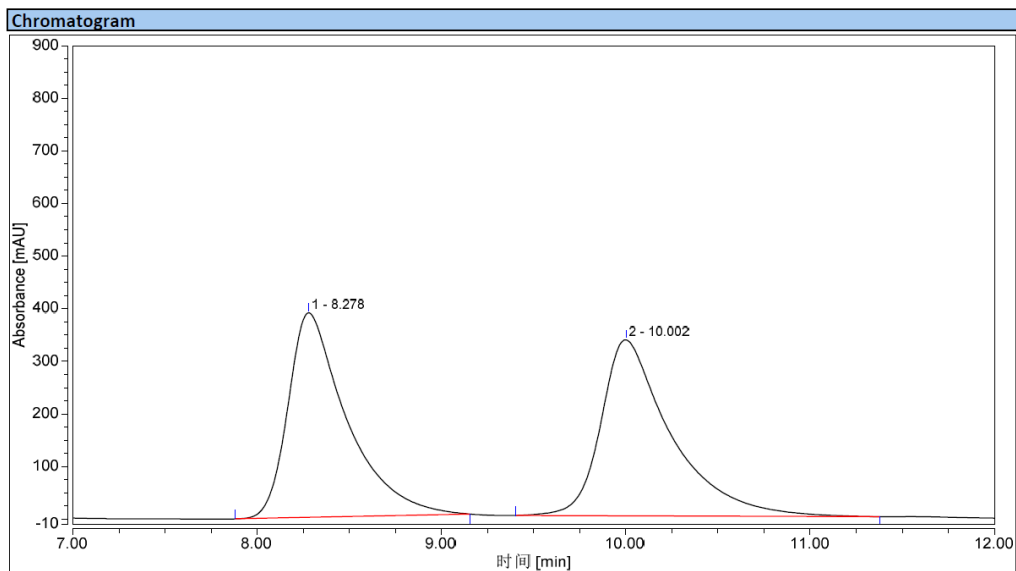

**Integration Results**

| No.           | Peak Name | Retention Time<br>min | Area<br>mAU*min | Height<br>mAU  | Relative Area<br>% | Relative Height<br>% | Amount<br>n.a. |
|---------------|-----------|-----------------------|-----------------|----------------|--------------------|----------------------|----------------|
| 1             |           | 8.278                 | 143.419         | 388.531        | 49.32              | 53.74                | n.a.           |
| 2             |           | 10.002                | 147.371         | 334.394        | 50.68              | 46.26                | n.a.           |
| <b>Total:</b> |           |                       | <b>290.790</b>  | <b>722.925</b> | <b>100.00</b>      | <b>100.00</b>        |                |

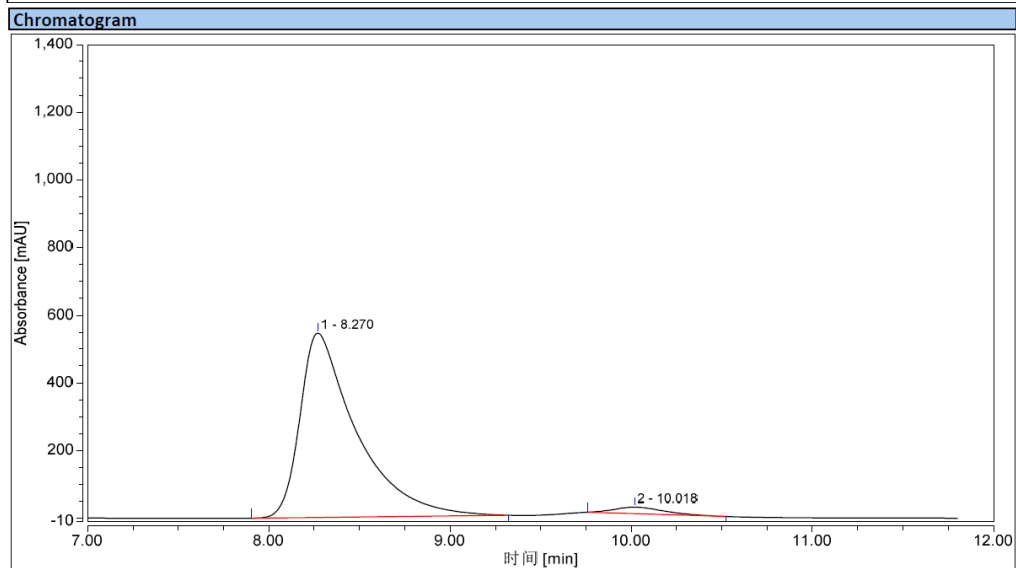

**Integration Results**

| No.           | Peak Name | Retention Time<br>min | Area<br>mAU*min | Height<br>mAU  | Relative Area<br>% | Relative Height<br>% | Amount<br>n.a. |
|---------------|-----------|-----------------------|-----------------|----------------|--------------------|----------------------|----------------|
| 1             |           | 8.270                 | 196.794         | 545.114        | 96.94              | 96.57                | n.a.           |
| 2             |           | 10.018                | 6.214           | 19.378         | 3.06               | 3.43                 | n.a.           |
| <b>Total:</b> |           |                       | <b>203.008</b>  | <b>564.493</b> | <b>100.00</b>      | <b>100.00</b>        |                |

Compound **2f**: HPLC (IA, *n*-hexane/2-propanol = 80/20,  $v = 1.0$  mL/min,  $\lambda = 254$  nm)

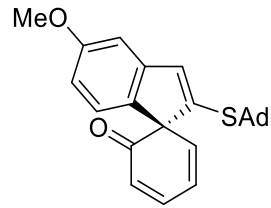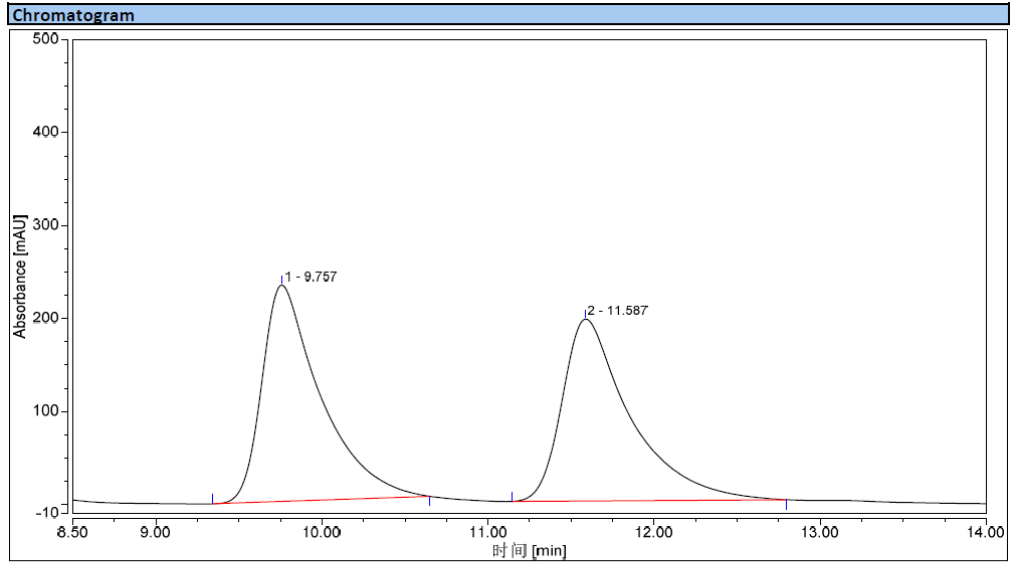

**Integration Results**

| No.           | Peak Name | Retention Time<br>min | Area<br>mAU*min | Height<br>mAU  | Relative Area<br>% | Relative Height<br>% | Amount<br>n.a. |
|---------------|-----------|-----------------------|-----------------|----------------|--------------------|----------------------|----------------|
| 1             |           | 9.757                 | 95.311          | 232.798        | 50.65              | 54.33                | n.a.           |
| 2             |           | 11.587                | 92.850          | 195.702        | 49.35              | 45.67                | n.a.           |
| <b>Total:</b> |           |                       | <b>188.161</b>  | <b>428.500</b> | <b>100.00</b>      | <b>100.00</b>        |                |

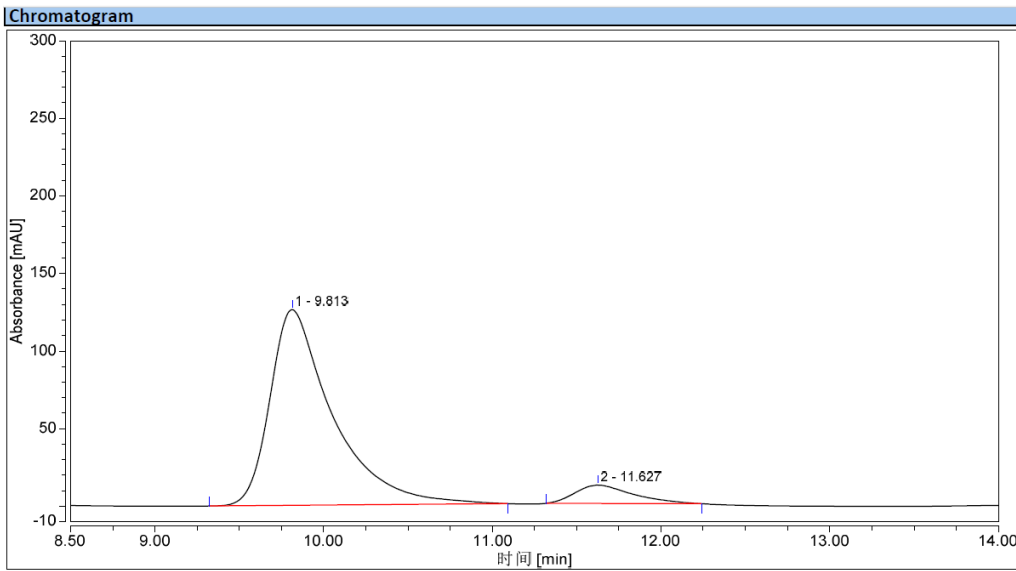

**Integration Results**

| No.           | Peak Name | Retention Time<br>min | Area<br>mAU*min | Height<br>mAU  | Relative Area<br>% | Relative Height<br>% | Amount<br>n.a. |
|---------------|-----------|-----------------------|-----------------|----------------|--------------------|----------------------|----------------|
| 1             |           | 9.813                 | 54.387          | 126.146        | 92.08              | 91.47                | n.a.           |
| 2             |           | 11.627                | 4.678           | 11.758         | 7.92               | 8.53                 | n.a.           |
| <b>Total:</b> |           |                       | <b>59.065</b>   | <b>137.904</b> | <b>100.00</b>      | <b>100.00</b>        |                |

Compound **2g**: HPLC (IC, *n*-hexane/2-propanol = 90/10,  $v = 1.0$  mL/min,  $\lambda = 254$  nm)

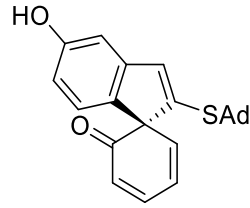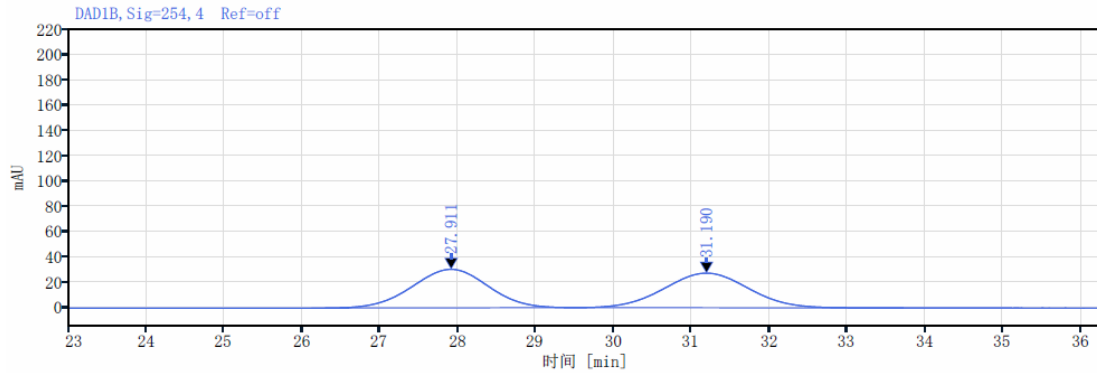

信号: DAD1B, Sig=254, 4 Ref=off

| 保留时间 [min] | 类型 | 峰宽 [min] | 峰面积     | 峰高    | 峰面积%  | 名称 |
|------------|----|----------|---------|-------|-------|----|
| 27.911     | BB | 3.37     | 2075.74 | 30.54 | 50.01 |    |
| 31.190     | BB | 4.23     | 2075.16 | 27.42 | 49.99 |    |
| 总和         |    |          | 4150.90 |       |       |    |

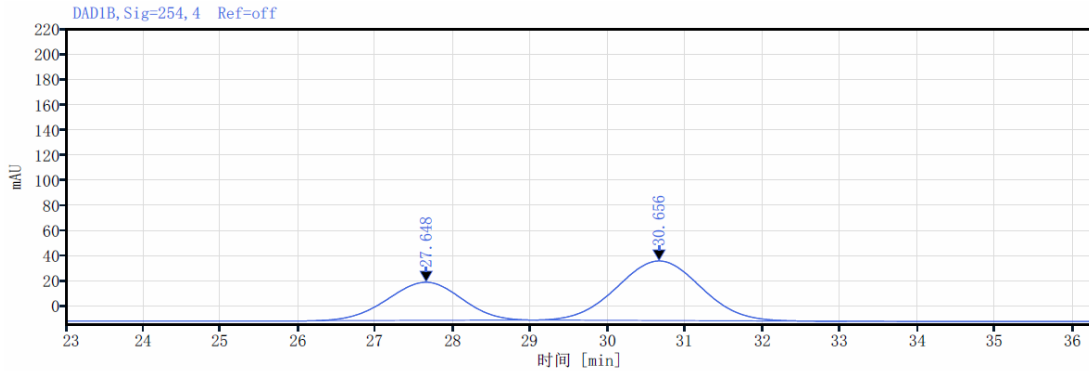

信号: DAD1B, Sig=254, 4 Ref=off

| 保留时间 [min] | 类型   | 峰宽 [min] | 峰面积     | 峰高    | 峰面积%  | 名称 |
|------------|------|----------|---------|-------|-------|----|
| 27.648     | MM m | 2.77     | 2010.56 | 30.27 | 36.02 |    |
| 30.656     | MM m | 4.02     | 3571.44 | 47.36 | 63.98 |    |
| 总和         |      |          | 5581.99 |       |       |    |

Compound **2h**: HPLC (IA, *n*-hexane/2-propanol = 80/20,  $v = 1.0$  mL/min,  $\lambda = 254$  nm)

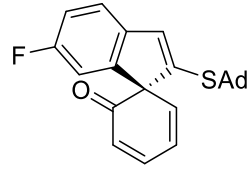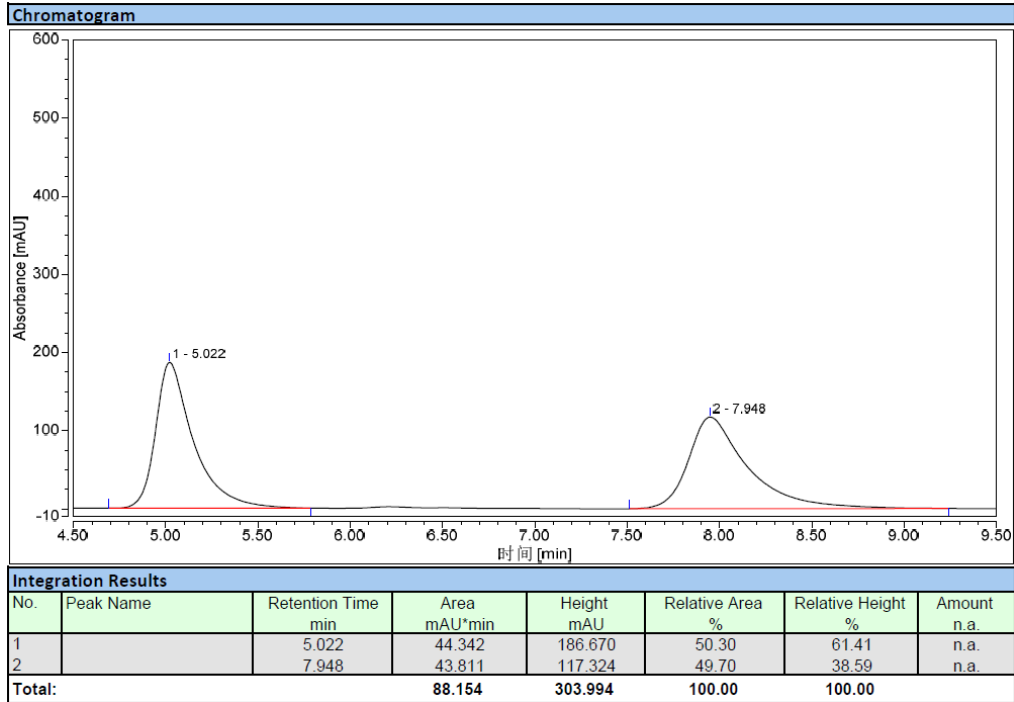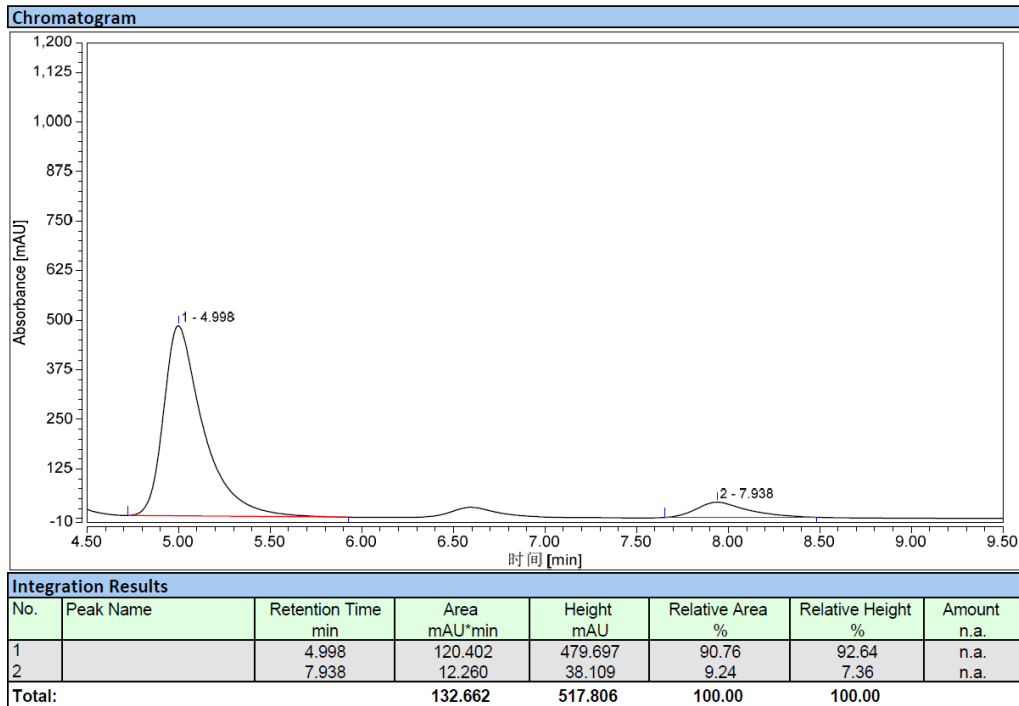

Compound **2i**: HPLC (IA, *n*-hexane/2-propanol = 80/20,  $v = 1.0$  mL/min,  $\lambda = 254$  nm)

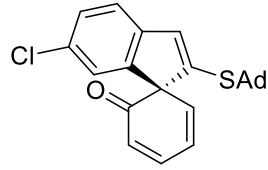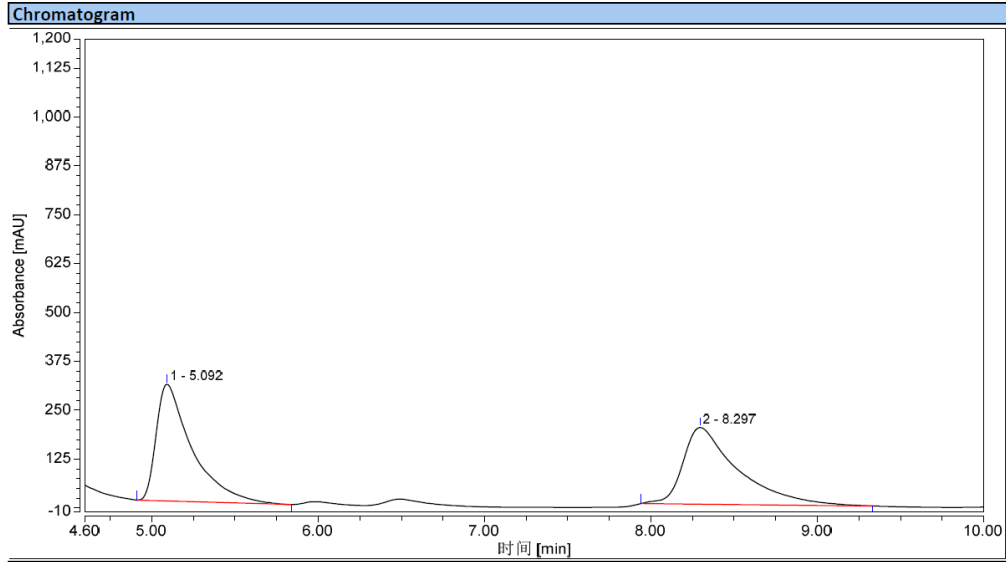

**Integration Results**

| No.           | Peak Name | Retention Time<br>min | Area<br>mAU*min | Height<br>mAU  | Relative Area<br>% | Relative Height<br>% | Amount |
|---------------|-----------|-----------------------|-----------------|----------------|--------------------|----------------------|--------|
| 1             |           | 5.092                 | 74.188          | 298.603        | 49.84              | 60.36                | n.a.   |
| 2             |           | 8.297                 | 74.658          | 196.135        | 50.16              | 39.64                | n.a.   |
| <b>Total:</b> |           |                       | <b>148.846</b>  | <b>494.738</b> | <b>100.00</b>      | <b>100.00</b>        |        |

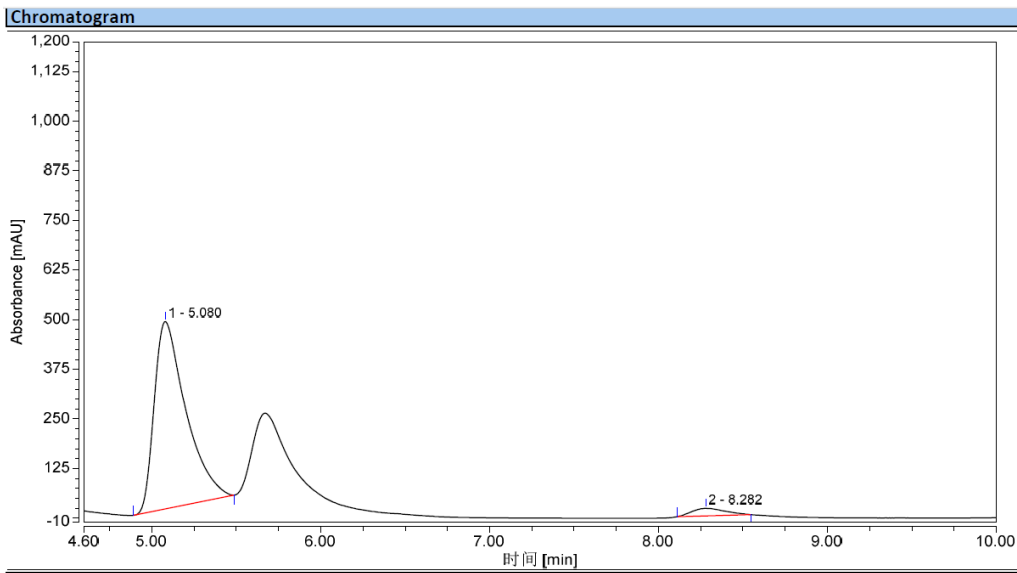

**Integration Results**

| No.           | Peak Name | Retention Time<br>min | Area<br>mAU*min | Height<br>mAU  | Relative Area<br>% | Relative Height<br>% | Amount |
|---------------|-----------|-----------------------|-----------------|----------------|--------------------|----------------------|--------|
| 1             |           | 5.080                 | 102.625         | 471.988        | 96.01              | 96.19                | n.a.   |
| 2             |           | 8.282                 | 4.261           | 18.720         | 3.99               | 3.81                 | n.a.   |
| <b>Total:</b> |           |                       | <b>106.885</b>  | <b>490.708</b> | <b>100.00</b>      | <b>100.00</b>        |        |

Compound **2j**: HPLC (IA, *n*-hexane/2-propanol = 80/20,  $v = 1.0$  mL/min,  $\lambda = 254$  nm)

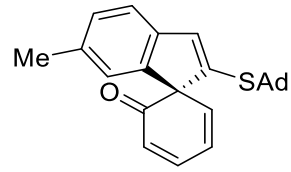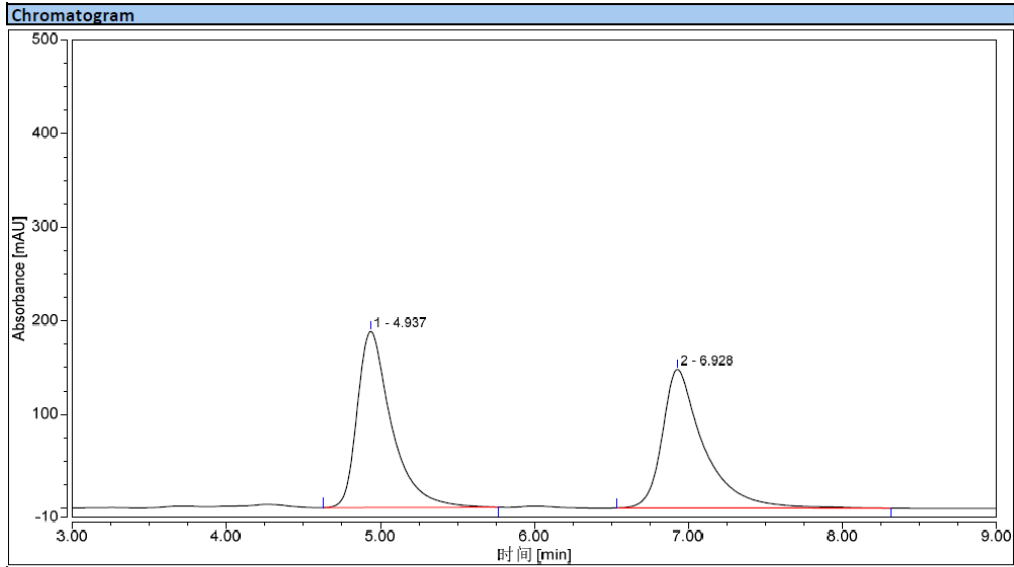

**Integration Results**

| No.           | Peak Name | Retention Time min | Area mAU*min  | Height mAU     | Relative Area % | Relative Height % | Amount |
|---------------|-----------|--------------------|---------------|----------------|-----------------|-------------------|--------|
| 1             |           | 4.937              | 48.488        | 188.239        | 51.23           | 56.00             | n.a.   |
| 2             |           | 6.928              | 46.167        | 147.919        | 48.77           | 44.00             | n.a.   |
| <b>Total:</b> |           |                    | <b>94.655</b> | <b>336.157</b> | <b>100.00</b>   | <b>100.00</b>     |        |

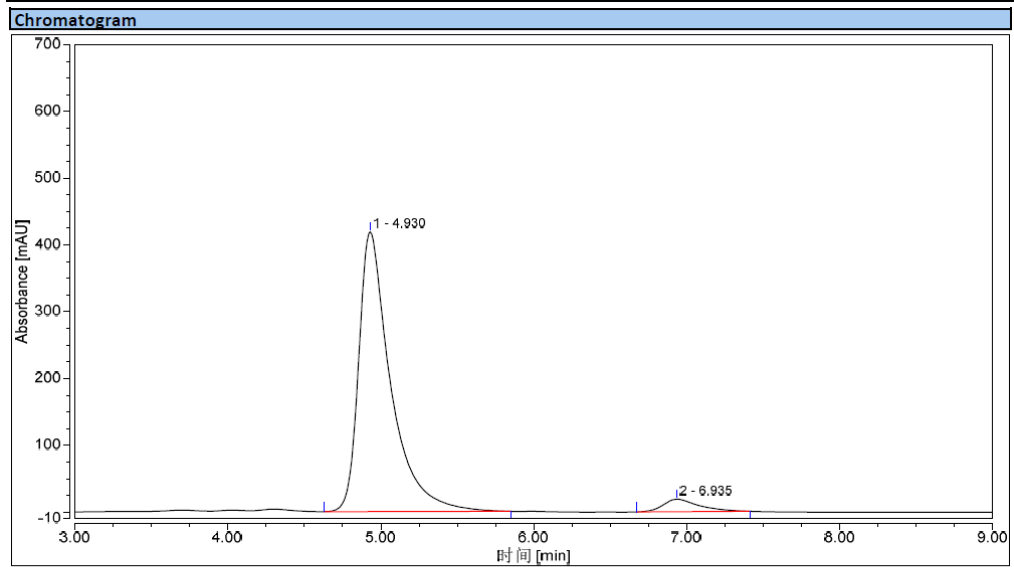

**Integration Results**

| No.           | Peak Name | Retention Time min | Area mAU*min   | Height mAU     | Relative Area % | Relative Height % | Amount |
|---------------|-----------|--------------------|----------------|----------------|-----------------|-------------------|--------|
| 1             |           | 4.930              | 101.194        | 419.213        | 95.23           | 95.73             | n.a.   |
| 2             |           | 6.935              | 5.069          | 18.700         | 4.77            | 4.27              | n.a.   |
| <b>Total:</b> |           |                    | <b>106.263</b> | <b>437.912</b> | <b>100.00</b>   | <b>100.00</b>     |        |

Compound **2k**: HPLC (IA, *n*-hexane/2-propanol = 80/20,  $v = 1.0$  mL/min,  $\lambda = 254$  nm)

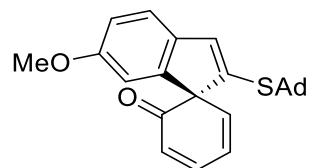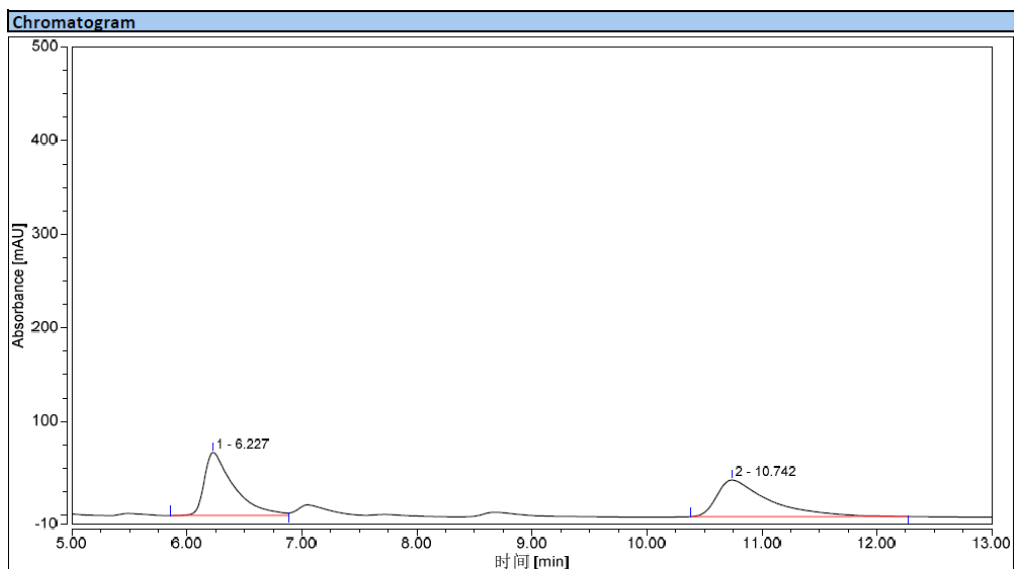

**Integration Results**

| No.           | Peak Name | Retention Time min | Area mAU*min  | Height mAU     | Relative Area % | Relative Height % | Amount |
|---------------|-----------|--------------------|---------------|----------------|-----------------|-------------------|--------|
| 1             |           | 6.227              | 19.936        | 67.240         | 49.24           | 63.20             | n.a.   |
| 2             |           | 10.742             | 20.550        | 39.152         | 50.76           | 36.80             | n.a.   |
| <b>Total:</b> |           |                    | <b>40.486</b> | <b>106.391</b> | <b>100.00</b>   | <b>100.00</b>     |        |

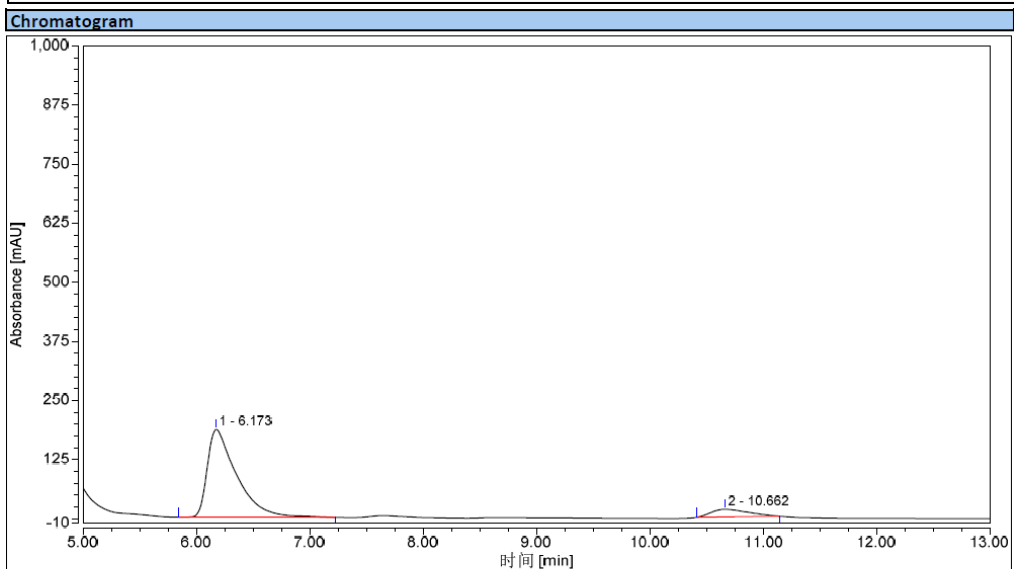

**Integration Results**

| No.           | Peak Name | Retention Time min | Area mAU*min  | Height mAU     | Relative Area % | Relative Height % | Amount |
|---------------|-----------|--------------------|---------------|----------------|-----------------|-------------------|--------|
| 1             |           | 6.173              | 55.332        | 185.468        | 90.11           | 92.07             | n.a.   |
| 2             |           | 10.662             | 6.070         | 15.978         | 9.89            | 7.93              | n.a.   |
| <b>Total:</b> |           |                    | <b>61.402</b> | <b>201.446</b> | <b>100.00</b>   | <b>100.00</b>     |        |



Compound **21**: HPLC (IC, *n*-hexane/2-propanol = 80/20,  $v = 1.0$  mL/min,  $\lambda = 254$  nm)

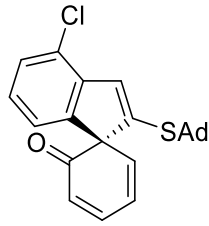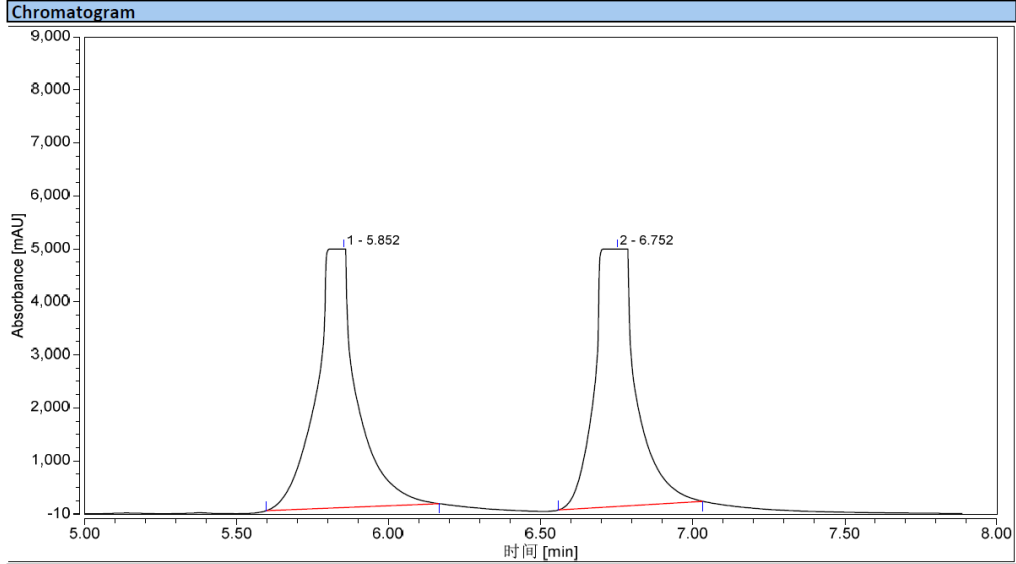

**Integration Results**

| No.           | Peak Name | Retention Time<br>min | Area<br>mAU*min | Height<br>mAU   | Relative Area<br>% | Relative Height<br>% | Amount<br>n.a. |
|---------------|-----------|-----------------------|-----------------|-----------------|--------------------|----------------------|----------------|
| 1             |           | 5.852                 | 763.856         | 4879.609        | 49.53              | 50.10                | n.a.           |
| 2             |           | 6.752                 | 778.307         | 4859.288        | 50.47              | 49.90                | n.a.           |
| <b>Total:</b> |           |                       | <b>1542.163</b> | <b>9738.897</b> | <b>100.00</b>      | <b>100.00</b>        |                |

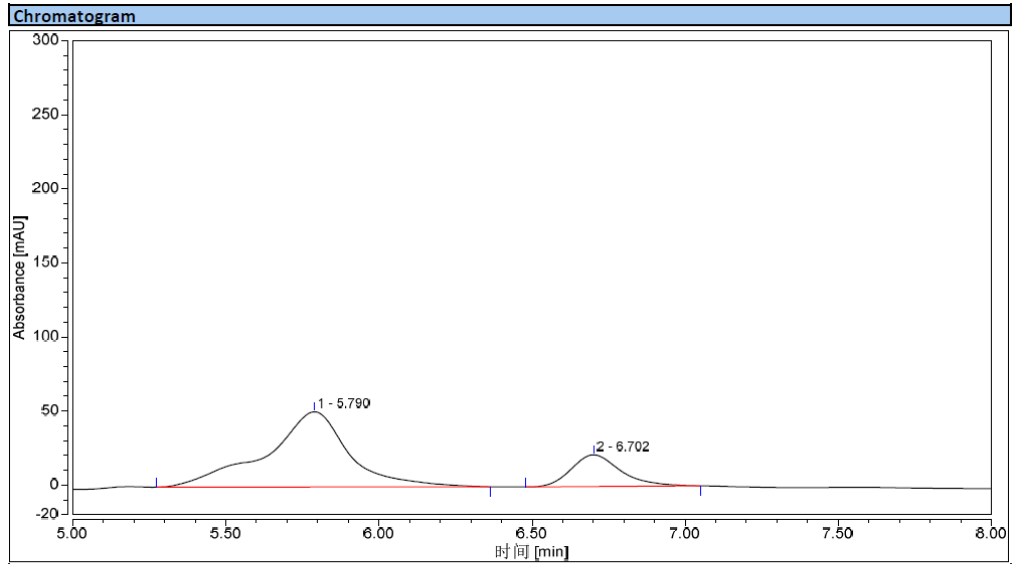

**Integration Results**

| No.           | Peak Name | Retention Time<br>min | Area<br>mAU*min | Height<br>mAU | Relative Area<br>% | Relative Height<br>% | Amount<br>n.a. |
|---------------|-----------|-----------------------|-----------------|---------------|--------------------|----------------------|----------------|
| 1             |           | 5.790                 | 15.927          | 50.807        | 79.96              | 70.37                | n.a.           |
| 2             |           | 6.702                 | 3.991           | 21.397        | 20.04              | 29.63                | n.a.           |
| <b>Total:</b> |           |                       | <b>19.918</b>   | <b>72.203</b> | <b>100.00</b>      | <b>100.00</b>        |                |

Compound **2m**: HPLC (IA, *n*-hexane/2-propanol = 80/20,  $v = 1.0$  mL/min,  $\lambda = 254$  nm)

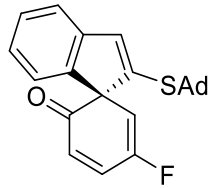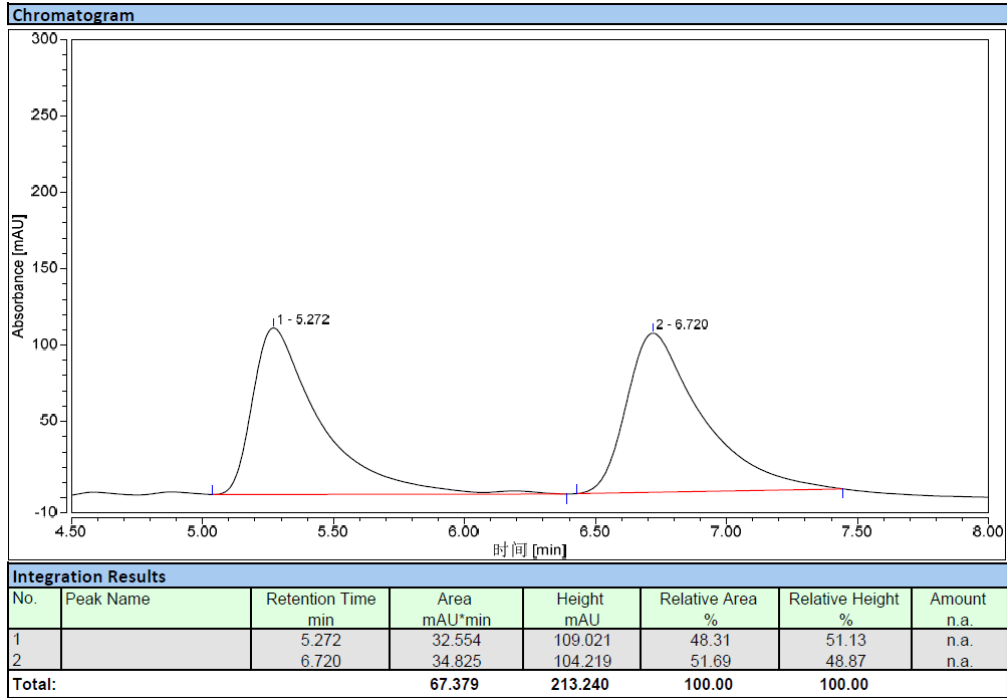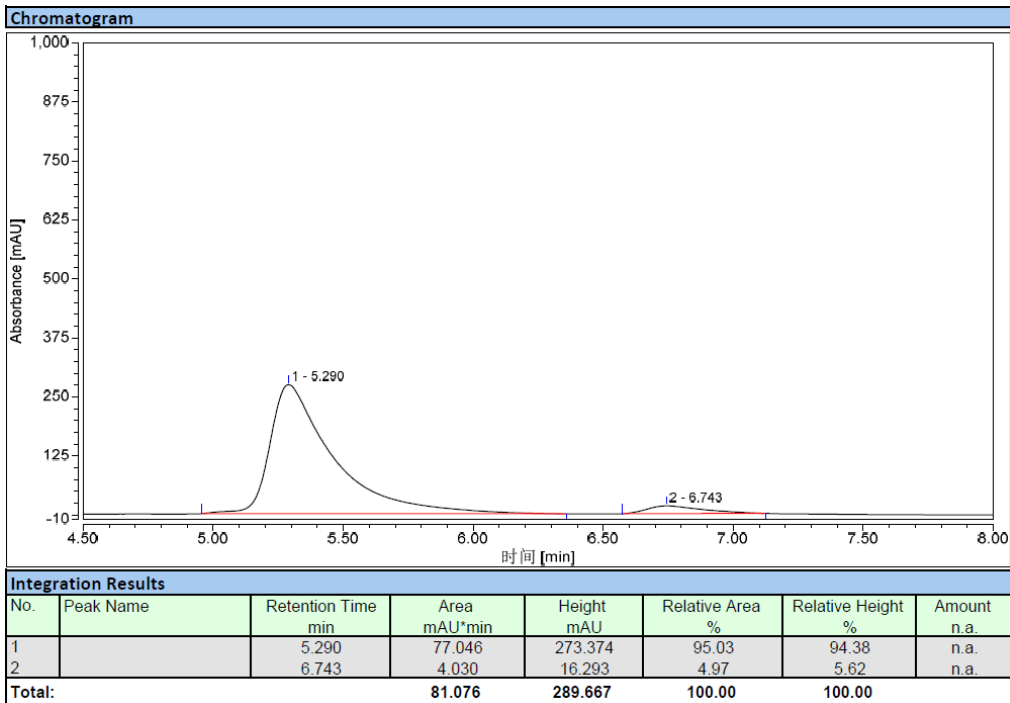

Compound **2n**: HPLC (IA, *n*-hexane/2-propanol = 80/20,  $v = 1.0$  mL/min,  $\lambda = 254$  nm)

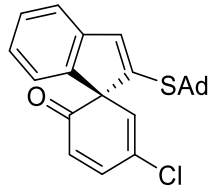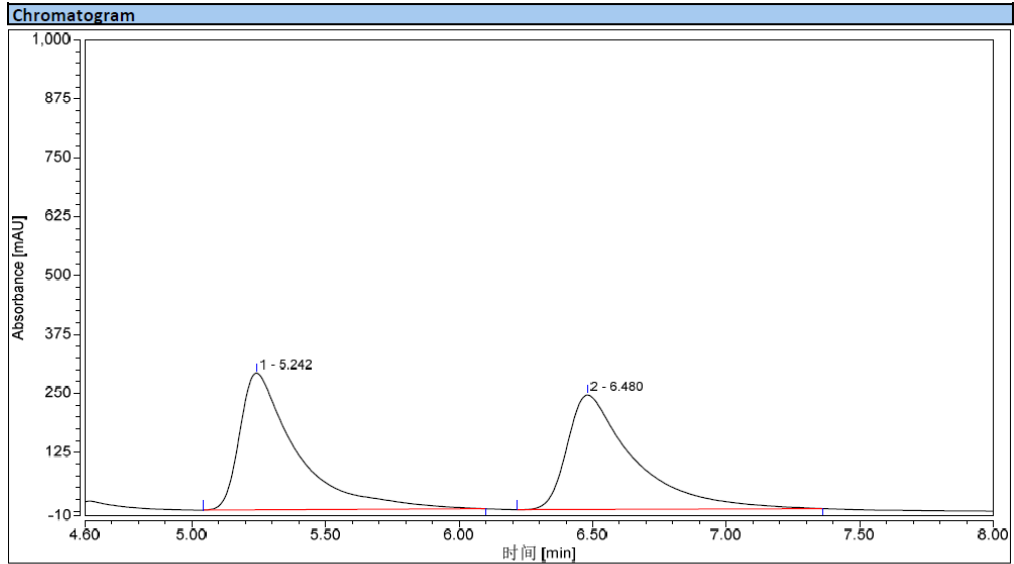

**Integration Results**

| No.           | Peak Name | Retention Time min | Area mAU*min   | Height mAU     | Relative Area % | Relative Height % | Amount |
|---------------|-----------|--------------------|----------------|----------------|-----------------|-------------------|--------|
| 1             |           | 5.242              | 71.369         | 289.844        | 50.54           | 54.46             | n.a.   |
| 2             |           | 6.480              | 69.834         | 242.411        | 49.46           | 45.54             | n.a.   |
| <b>Total:</b> |           |                    | <b>141.203</b> | <b>532.255</b> | <b>100.00</b>   | <b>100.00</b>     |        |

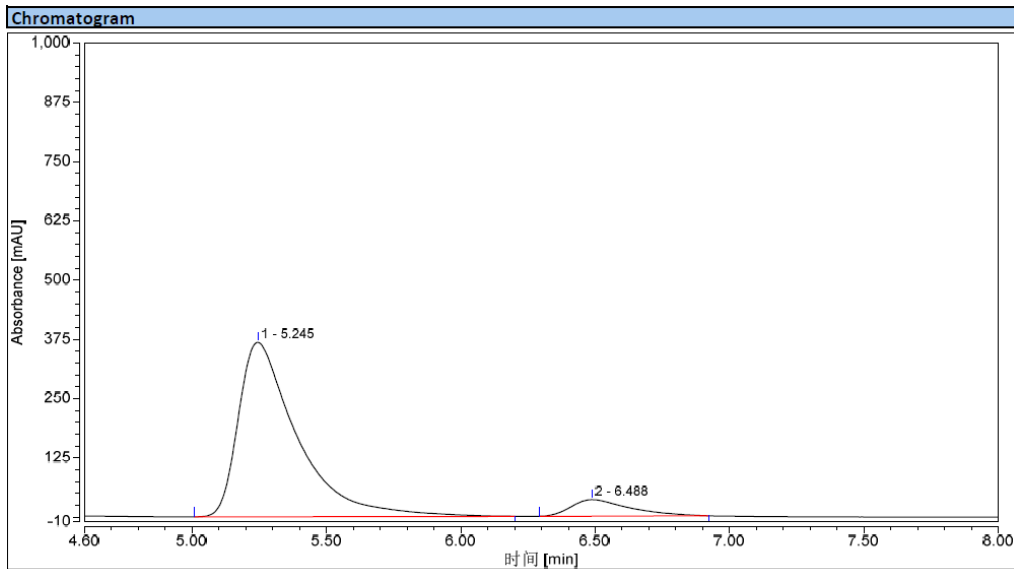

**Integration Results**

| No.           | Peak Name | Retention Time min | Area mAU*min   | Height mAU     | Relative Area % | Relative Height % | Amount |
|---------------|-----------|--------------------|----------------|----------------|-----------------|-------------------|--------|
| 1             |           | 5.245              | 93.367         | 367.973        | 91.51           | 91.41             | n.a.   |
| 2             |           | 6.488              | 8.666          | 34.558         | 8.49            | 8.59              | n.a.   |
| <b>Total:</b> |           |                    | <b>102.033</b> | <b>402.530</b> | <b>100.00</b>   | <b>100.00</b>     |        |

Compound **2o**: HPLC (IA, *n*-hexane/2-propanol = 80/20,  $v = 1.0$  mL/min,  $\lambda = 254$  nm)

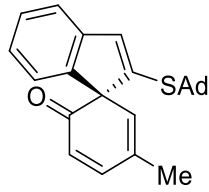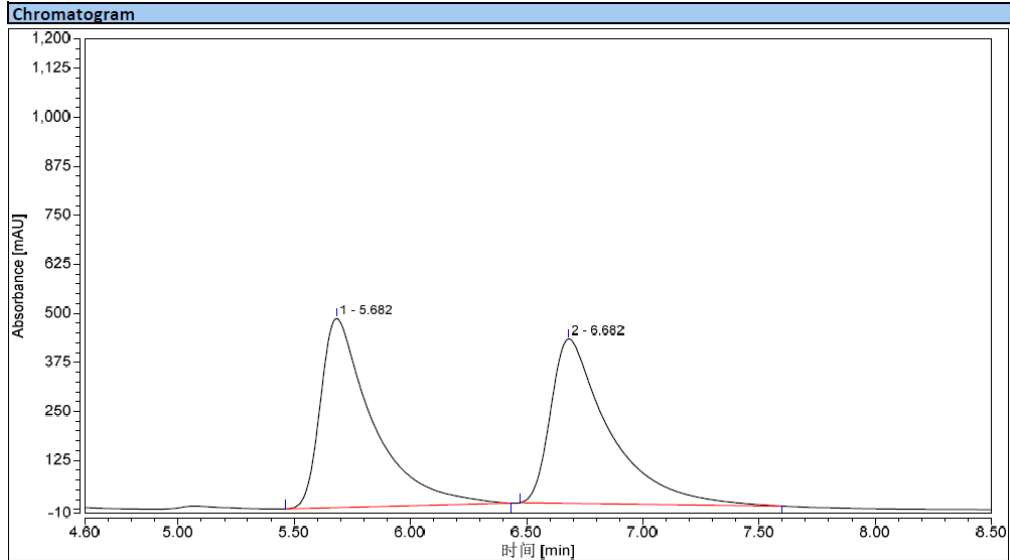

**Integration Results**

| No.           | Peak Name | Retention Time<br>min | Area<br>mAU*min | Height<br>mAU  | Relative Area<br>% | Relative Height<br>% | Amount |
|---------------|-----------|-----------------------|-----------------|----------------|--------------------|----------------------|--------|
| 1             |           | 5.682                 | 125.433         | 482.448        | 50.69              | 53.51                | n.a.   |
| 2             |           | 6.682                 | 122.014         | 419.155        | 49.31              | 46.49                | n.a.   |
| <b>Total:</b> |           |                       | <b>247.448</b>  | <b>901.603</b> | <b>100.00</b>      | <b>100.00</b>        |        |

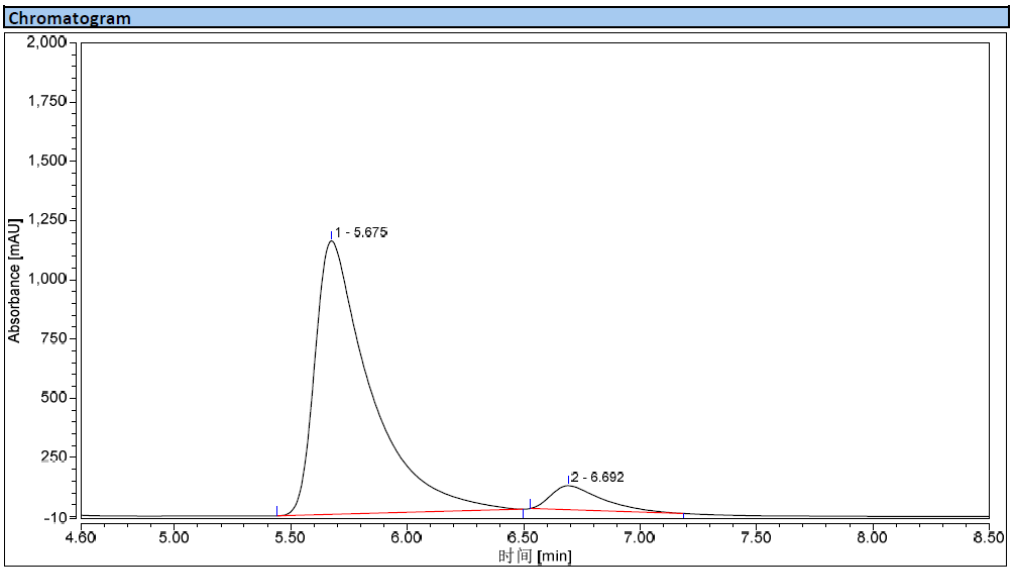

**Integration Results**

| No.           | Peak Name | Retention Time<br>min | Area<br>mAU*min | Height<br>mAU   | Relative Area<br>% | Relative Height<br>% | Amount |
|---------------|-----------|-----------------------|-----------------|-----------------|--------------------|----------------------|--------|
| 1             |           | 5.675                 | 318.353         | 1154.973        | 92.57              | 91.95                | n.a.   |
| 2             |           | 6.692                 | 25.538          | 101.070         | 7.43               | 8.05                 | n.a.   |
| <b>Total:</b> |           |                       | <b>343.892</b>  | <b>1256.043</b> | <b>100.00</b>      | <b>100.00</b>        |        |

Compound **2p**: HPLC (IA, *n*-hexane/2-propanol = 80/20,  $v = 1.0$  mL/min,  $\lambda = 254$  nm)

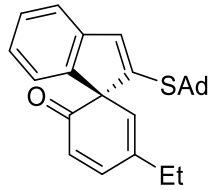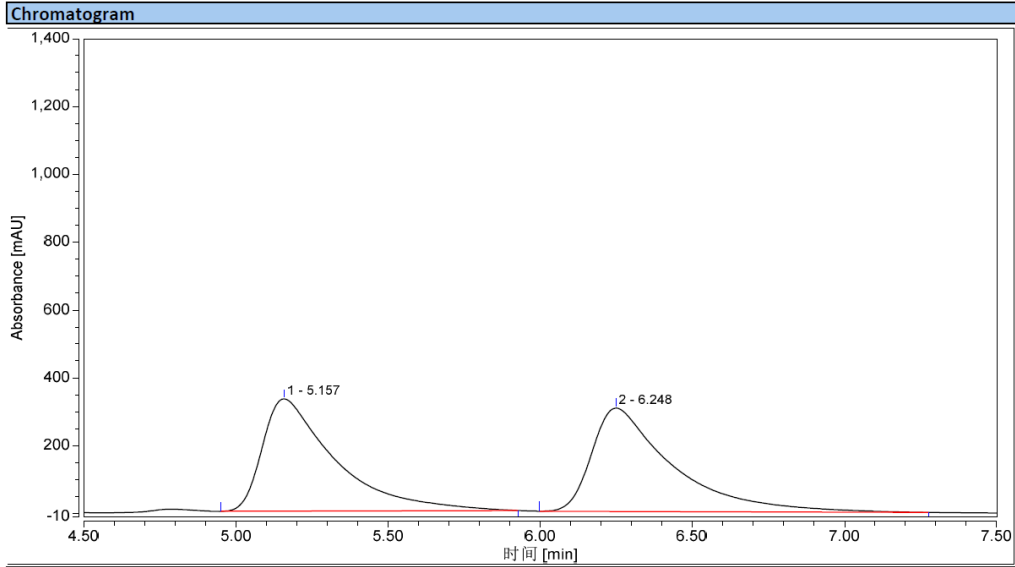

**Integration Results**

| No.           | Peak Name | Retention Time min | Area mAU*min   | Height mAU     | Relative Area % | Relative Height % | Amount |
|---------------|-----------|--------------------|----------------|----------------|-----------------|-------------------|--------|
| 1             |           | 5.157              | 91.644         | 331.114        | 49.61           | 52.08             | n.a.   |
| 2             |           | 6.248              | 93.077         | 304.614        | 50.39           | 47.92             | n.a.   |
| <b>Total:</b> |           |                    | <b>184.722</b> | <b>635.728</b> | <b>100.00</b>   | <b>100.00</b>     |        |

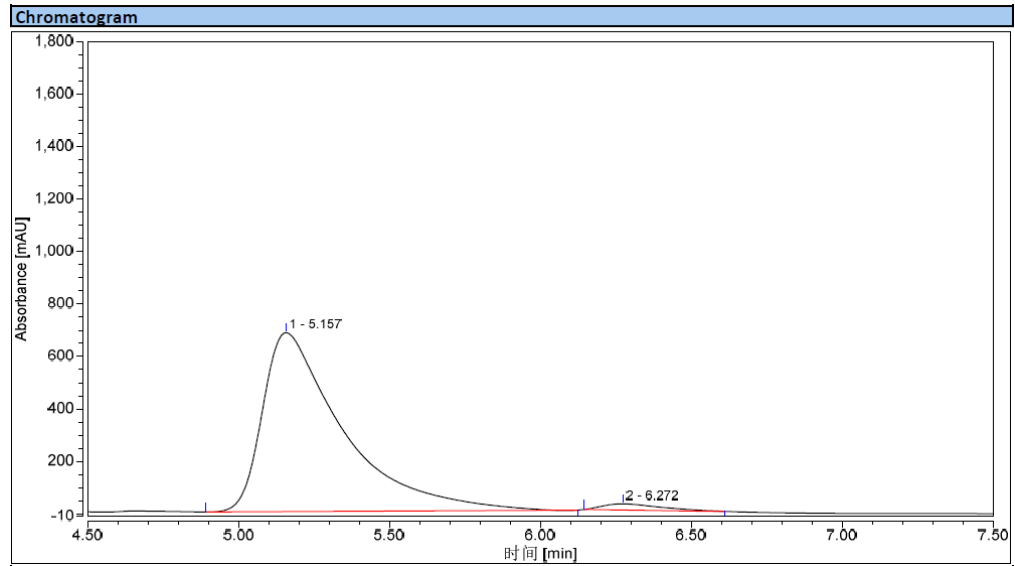

**Integration Results**

| No.           | Peak Name | Retention Time min | Area mAU*min   | Height mAU     | Relative Area % | Relative Height % | Amount |
|---------------|-----------|--------------------|----------------|----------------|-----------------|-------------------|--------|
| 1             |           | 5.157              | 209.694        | 682.194        | 97.52           | 96.62             | n.a.   |
| 2             |           | 6.272              | 5.334          | 23.845         | 2.48            | 3.38              | n.a.   |
| <b>Total:</b> |           |                    | <b>215.028</b> | <b>706.039</b> | <b>100.00</b>   | <b>100.00</b>     |        |

Compound **2q**: HPLC (IA, *n*-hexane/2-propanol = 90/10,  $v = 1.0$  mL/min,  $\lambda = 254$  nm)

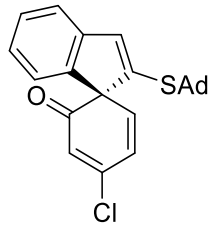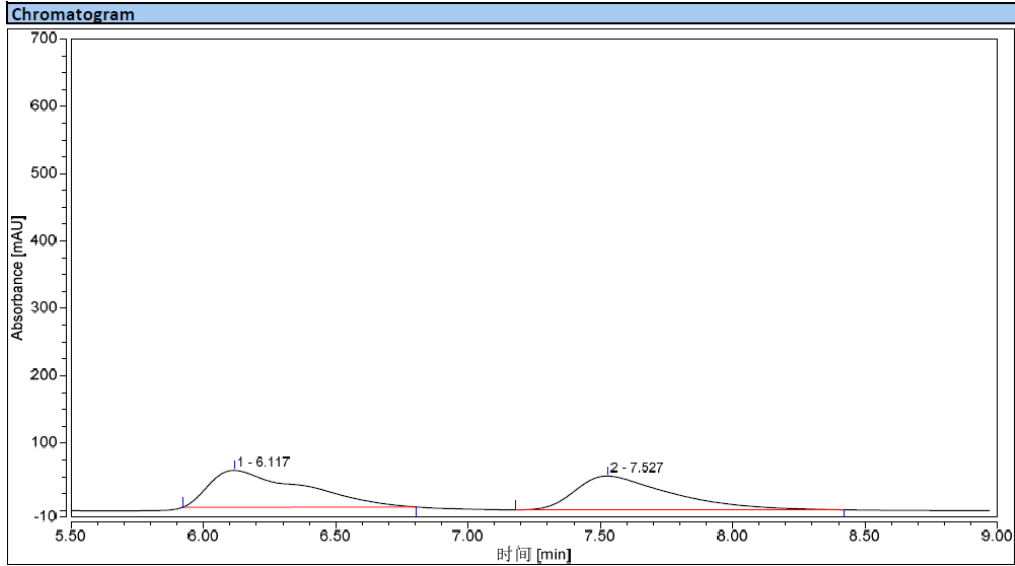

**Integration Results**

| No.           | Peak Name | Retention Time<br>min | Area<br>mAU*min | Height<br>mAU  | Relative Area<br>% | Relative Height<br>% | Amount<br>n.a. |
|---------------|-----------|-----------------------|-----------------|----------------|--------------------|----------------------|----------------|
| 1             |           | 6.117                 | 22.278          | 54.528         | 51.61              | 52.10                | n.a.           |
| 2             |           | 7.527                 | 20.887          | 50.137         | 48.39              | 47.90                | n.a.           |
| <b>Total:</b> |           |                       | <b>43.165</b>   | <b>104.665</b> | <b>100.00</b>      | <b>100.00</b>        |                |

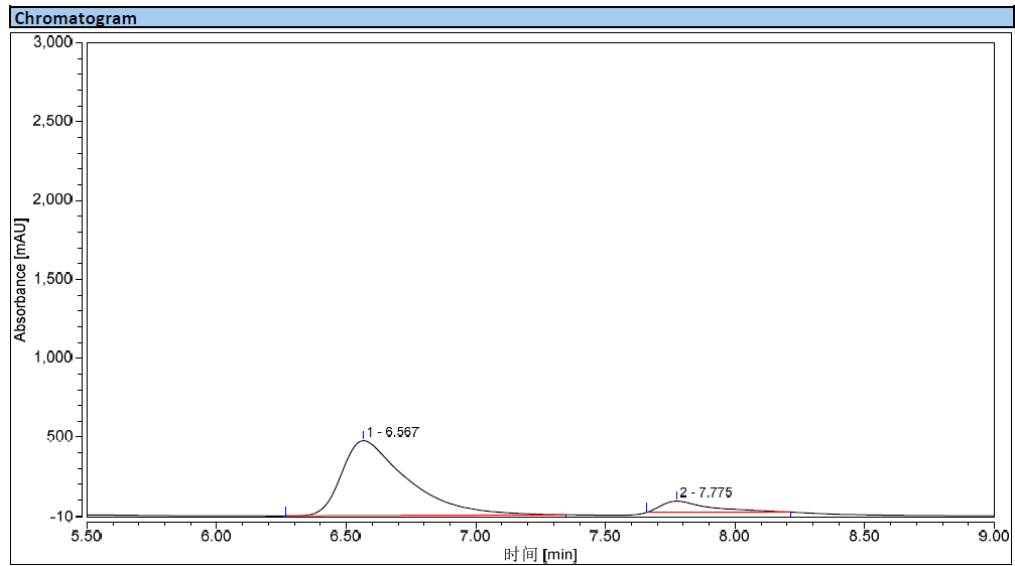

**Integration Results**

| No.           | Peak Name | Retention Time<br>min | Area<br>mAU*min | Height<br>mAU  | Relative Area<br>% | Relative Height<br>% | Amount<br>n.a. |
|---------------|-----------|-----------------------|-----------------|----------------|--------------------|----------------------|----------------|
| 1             |           | 6.567                 | 139.423         | 474.498        | 90.05              | 87.15                | n.a.           |
| 2             |           | 7.775                 | 15.402          | 69.982         | 9.95               | 12.85                | n.a.           |
| <b>Total:</b> |           |                       | <b>154.826</b>  | <b>544.480</b> | <b>100.00</b>      | <b>100.00</b>        |                |

Compound **2r**: HPLC (IA, *n*-hexane/2-propanol = 80/20,  $v = 1.0$  mL/min,  $\lambda = 254$  nm)

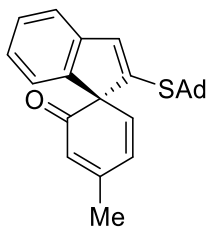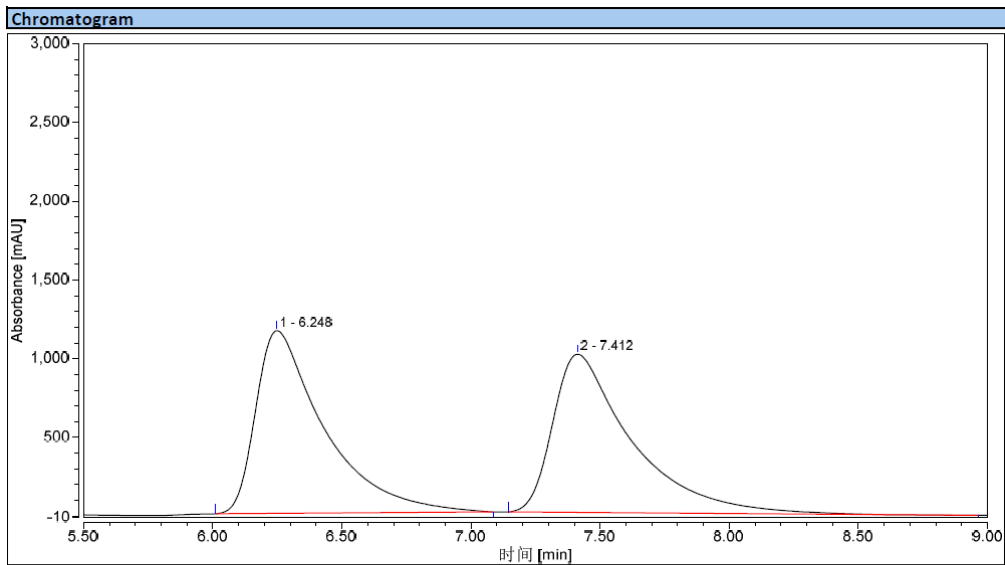

**Integration Results**

| No.           | Peak Name | Retention Time<br>min | Area<br>mAU*min | Height<br>mAU   | Relative Area<br>% | Relative Height<br>% | Amount<br>n.a. |
|---------------|-----------|-----------------------|-----------------|-----------------|--------------------|----------------------|----------------|
| 1             |           | 6.248                 | 355.908         | 1159.694        | 50.16              | 53.61                | n.a.           |
| 2             |           | 7.412                 | 353.626         | 1003.611        | 49.84              | 46.39                | n.a.           |
| <b>Total:</b> |           |                       | <b>709.534</b>  | <b>2163.305</b> | <b>100.00</b>      | <b>100.00</b>        |                |

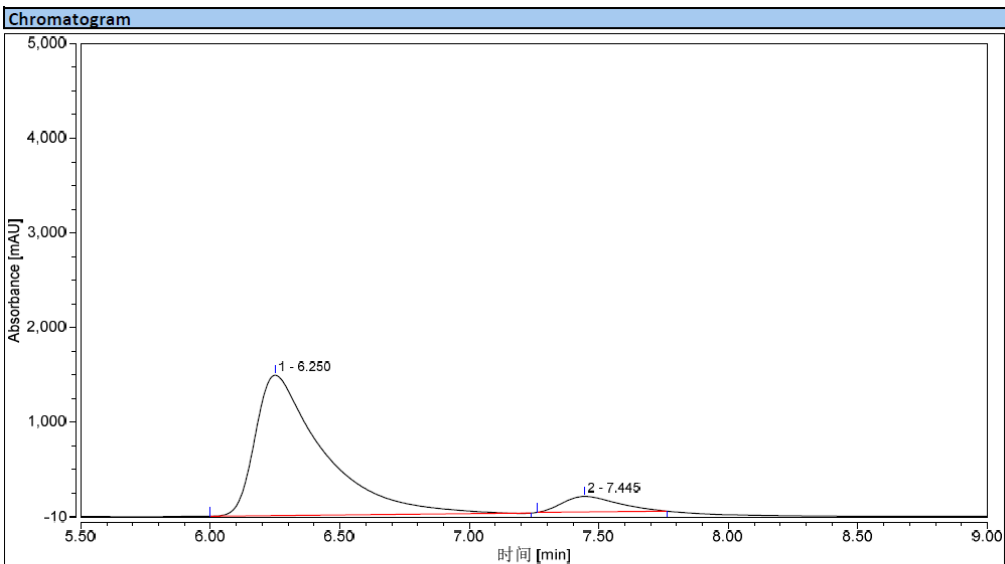

**Integration Results**

| No.           | Peak Name | Retention Time<br>min | Area<br>mAU*min | Height<br>mAU   | Relative Area<br>% | Relative Height<br>% | Amount<br>n.a. |
|---------------|-----------|-----------------------|-----------------|-----------------|--------------------|----------------------|----------------|
| 1             |           | 6.250                 | 452.407         | 1483.592        | 91.90              | 90.10                | n.a.           |
| 2             |           | 7.445                 | 39.864          | 163.074         | 8.10               | 9.90                 | n.a.           |
| <b>Total:</b> |           |                       | <b>492.270</b>  | <b>1646.667</b> | <b>100.00</b>      | <b>100.00</b>        |                |

Compound **2s**: HPLC (IA, *n*-hexane/2-propanol = 80/20,  $v = 1.0$  mL/min,  $\lambda = 254$  nm)

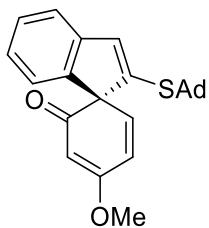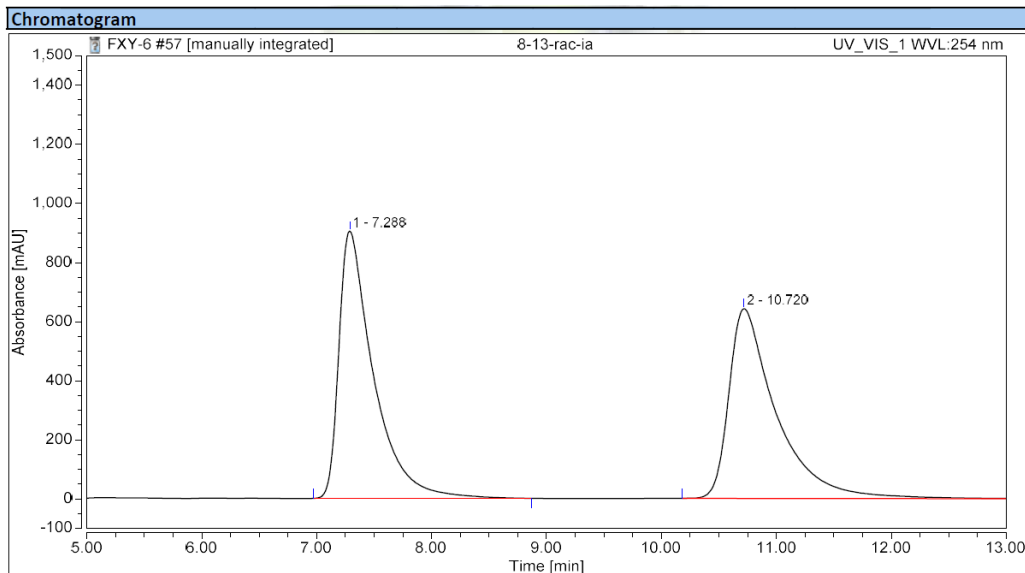

**Integration Results**

| No.           | Peak Name | Retention Time<br>min | Area<br>mAU*min | Height<br>mAU   | Relative Area<br>% | Relative Height<br>% | Amount<br>n.a. |
|---------------|-----------|-----------------------|-----------------|-----------------|--------------------|----------------------|----------------|
| 1             |           | 7.288                 | 314.743         | 905.023         | 50.64              | 58.49                | n.a.           |
| 2             |           | 10.720                | 306.766         | 642.171         | 49.36              | 41.51                | n.a.           |
| <b>Total:</b> |           |                       | <b>621.509</b>  | <b>1547.193</b> | <b>100.00</b>      | <b>100.00</b>        |                |

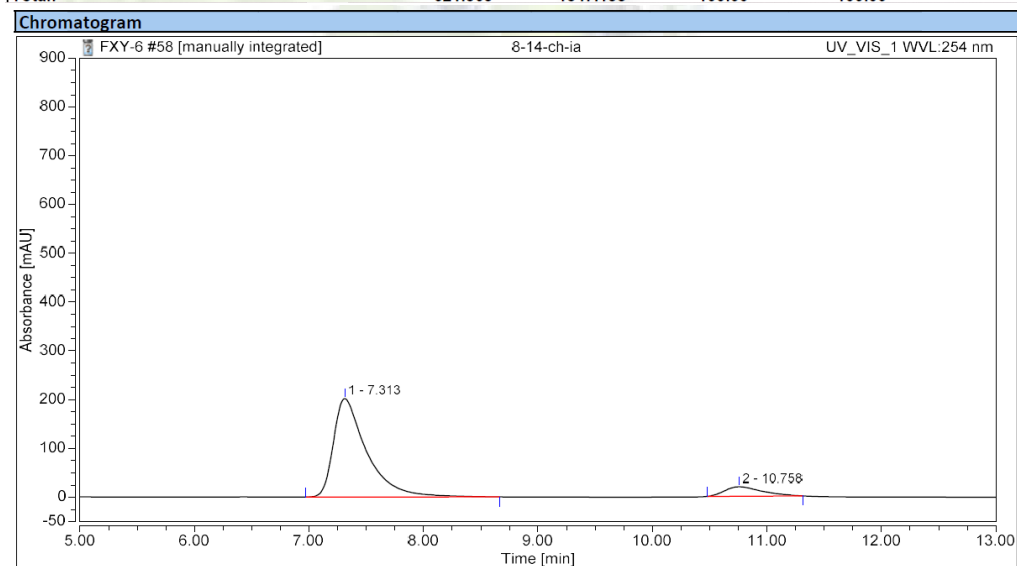

**Integration Results**

| No.           | Peak Name | Retention Time<br>min | Area<br>mAU*min | Height<br>mAU  | Relative Area<br>% | Relative Height<br>% | Amount<br>n.a. |
|---------------|-----------|-----------------------|-----------------|----------------|--------------------|----------------------|----------------|
| 1             |           | 7.313                 | 68.007          | 201.758        | 90.30              | 91.21                | n.a.           |
| 2             |           | 10.758                | 7.306           | 19.435         | 9.70               | 8.79                 | n.a.           |
| <b>Total:</b> |           |                       | <b>75.312</b>   | <b>221.193</b> | <b>100.00</b>      | <b>100.00</b>        |                |



Compound **2t**: HPLC (IA, *n*-hexane/2-propanol = 95/5,  $v = 1.0$  mL/min,  $\lambda = 254$  nm)

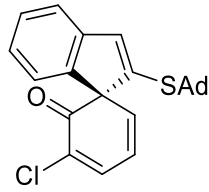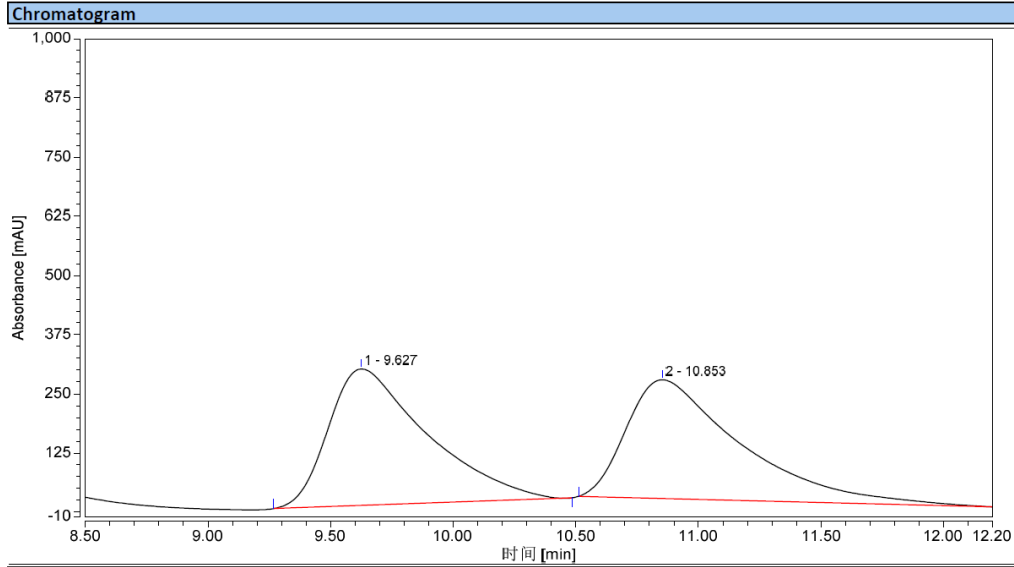

**Integration Results**

| No.           | Peak Name | Retention Time min | Area mAU*min   | Height mAU     | Relative Area % | Relative Height % | Amount |
|---------------|-----------|--------------------|----------------|----------------|-----------------|-------------------|--------|
| 1             |           | 9.627              | 133.639        | 288.080        | 49.82           | 53.49             | n.a.   |
| 2             |           | 10.853             | 134.594        | 250.466        | 50.18           | 46.51             | n.a.   |
| <b>Total:</b> |           |                    | <b>268.233</b> | <b>538.546</b> | <b>100.00</b>   | <b>100.00</b>     |        |

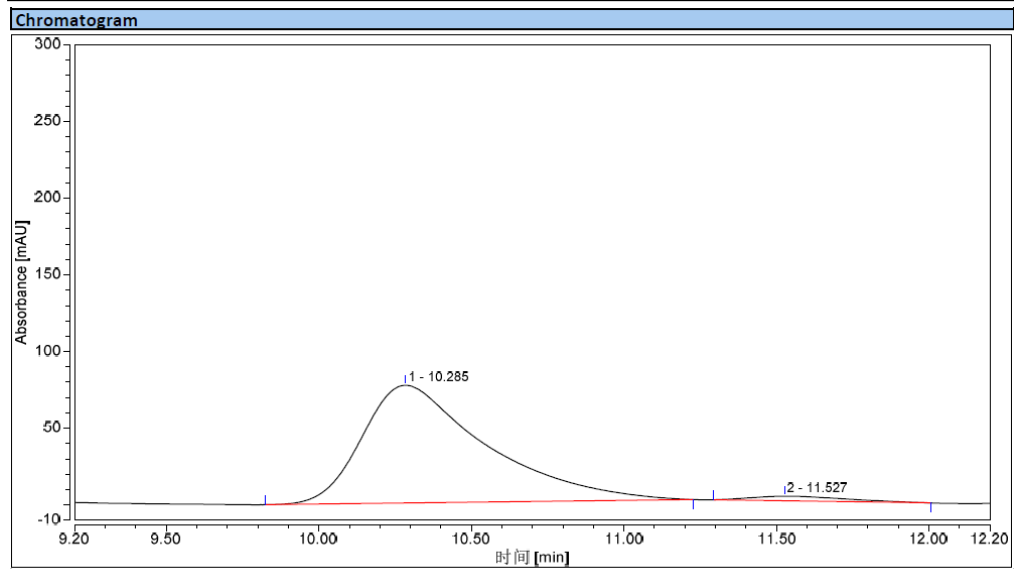

**Integration Results**

| No.           | Peak Name | Retention Time min | Area mAU*min  | Height mAU    | Relative Area % | Relative Height % | Amount |
|---------------|-----------|--------------------|---------------|---------------|-----------------|-------------------|--------|
| 1             |           | 10.285             | 36.113        | 76.785        | 97.15           | 96.30             | n.a.   |
| 2             |           | 11.527             | 1.060         | 2.951         | 2.85            | 3.70              | n.a.   |
| <b>Total:</b> |           |                    | <b>37.173</b> | <b>79.736</b> | <b>100.00</b>   | <b>100.00</b>     |        |

Compound **2u**: HPLC (IA, *n*-hexane/2-propanol = 90/10,  $v = 1.0$  mL/min,  $\lambda = 254$  nm)

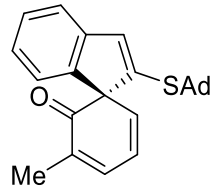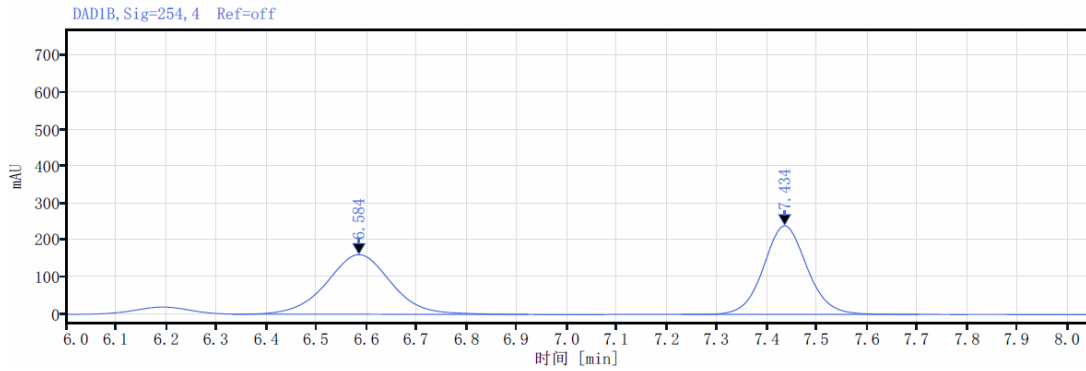

信号: DAD1B, Sig=254, 4 Ref=off

| 保留时间 [min] | 类型   | 峰宽 [min] | 峰面积     | 峰高     | 峰面积%  | 名称 |
|------------|------|----------|---------|--------|-------|----|
| 6.584      | MM m | 0.59     | 1454.36 | 161.72 | 50.02 |    |
| 7.434      | MM m | 0.47     | 1453.43 | 240.70 | 49.98 |    |
| 总和         |      |          | 2907.79 |        |       |    |

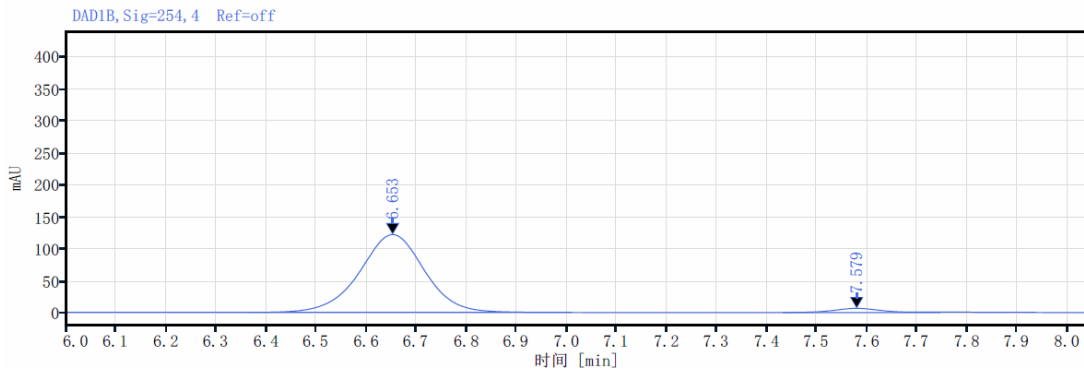

信号: DAD1B, Sig=254, 4 Ref=off

| 保留时间 [min] | 类型   | 峰宽 [min] | 峰面积     | 峰高     | 峰面积%  | 名称 |
|------------|------|----------|---------|--------|-------|----|
| 6.653      | MM m | 0.65     | 1096.52 | 121.76 | 96.21 |    |
| 7.579      | MM m | 0.31     | 43.20   | 6.49   | 3.79  |    |
| 总和         |      |          | 1139.72 |        |       |    |

Compound **2v**: HPLC (IA, *n*-hexane/2-propanol = 95/5,  $v = 1.0$  mL/min,  $\lambda = 254$  nm)

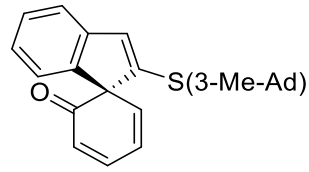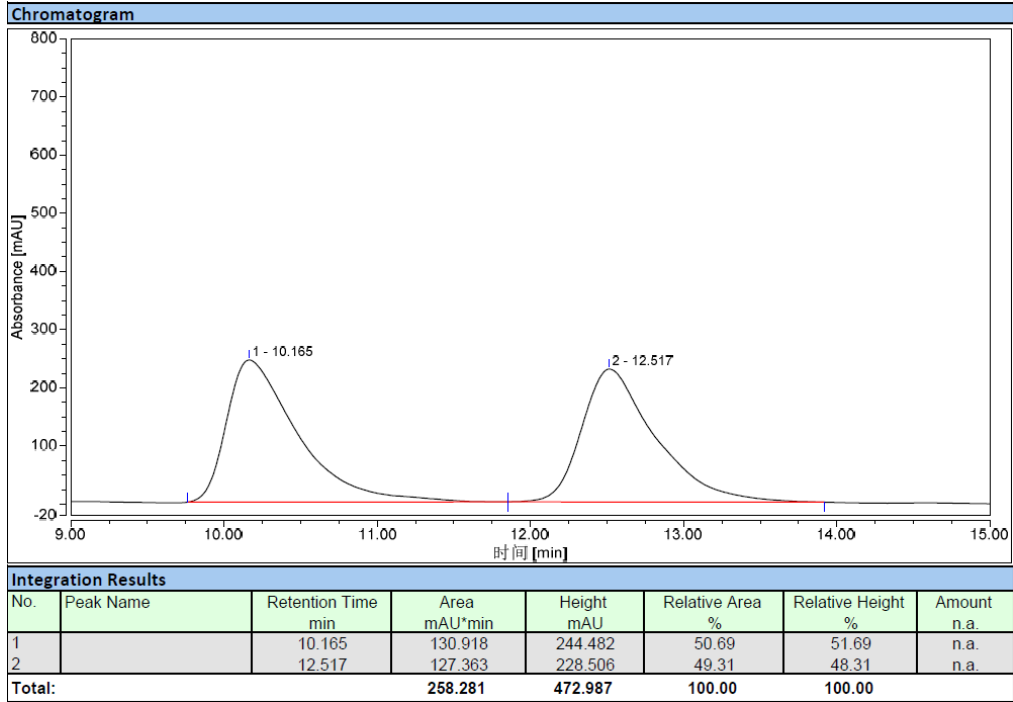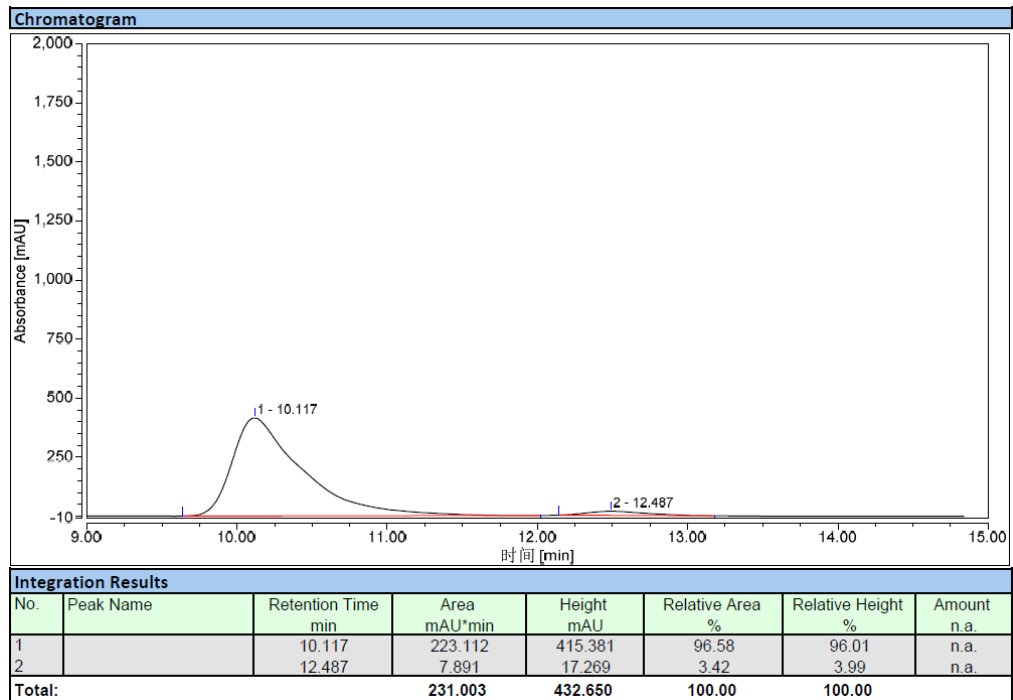

Compound **2w**: HPLC (IC, *n*-hexane/2-propanol = 95/5,  $v = 1.0$  mL/min,  $\lambda = 254$  nm)

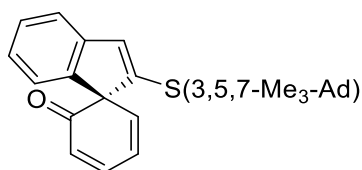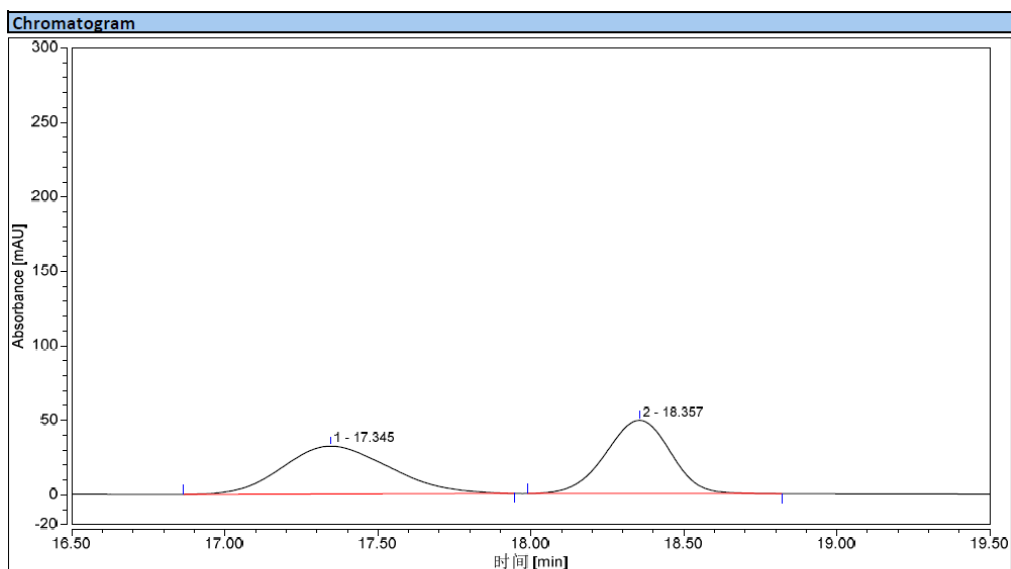

**Integration Results**

| No.           | Peak Name | Retention Time min | Area mAU*min  | Height mAU    | Relative Area % | Relative Height % | Amount |
|---------------|-----------|--------------------|---------------|---------------|-----------------|-------------------|--------|
| 1             |           | 17.345             | 12.969        | 32.069        | 51.83           | 39.53             | n.a.   |
| 2             |           | 18.357             | 12.054        | 49.053        | 48.17           | 60.47             | n.a.   |
| <b>Total:</b> |           |                    | <b>25.023</b> | <b>81.122</b> | <b>100.00</b>   | <b>100.00</b>     |        |

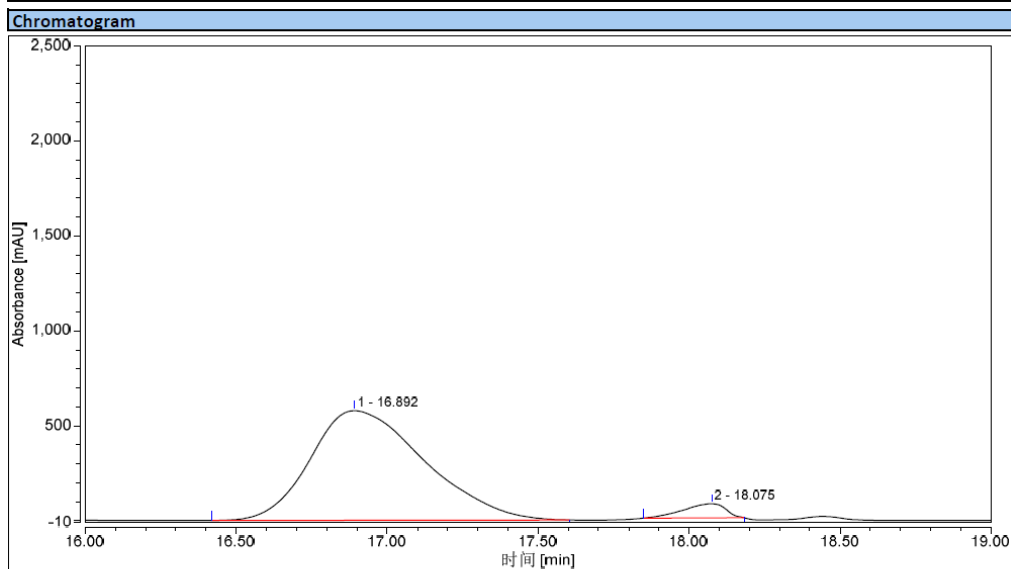

**Integration Results**

| No.           | Peak Name | Retention Time min | Area mAU*min   | Height mAU     | Relative Area % | Relative Height % | Amount |
|---------------|-----------|--------------------|----------------|----------------|-----------------|-------------------|--------|
| 1             |           | 16.892             | 252.921        | 577.213        | 95.42           | 88.58             | n.a.   |
| 2             |           | 18.075             | 12.141         | 74.387         | 4.58            | 11.42             | n.a.   |
| <b>Total:</b> |           |                    | <b>265.062</b> | <b>651.600</b> | <b>100.00</b>   | <b>100.00</b>     |        |

Compound **2x**: HPLC (IA, *n*-hexane/2-propanol = 80/20,  $v = 1.0$  mL/min,  $\lambda = 254$  nm)

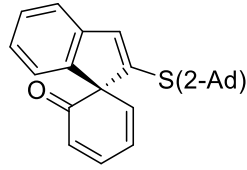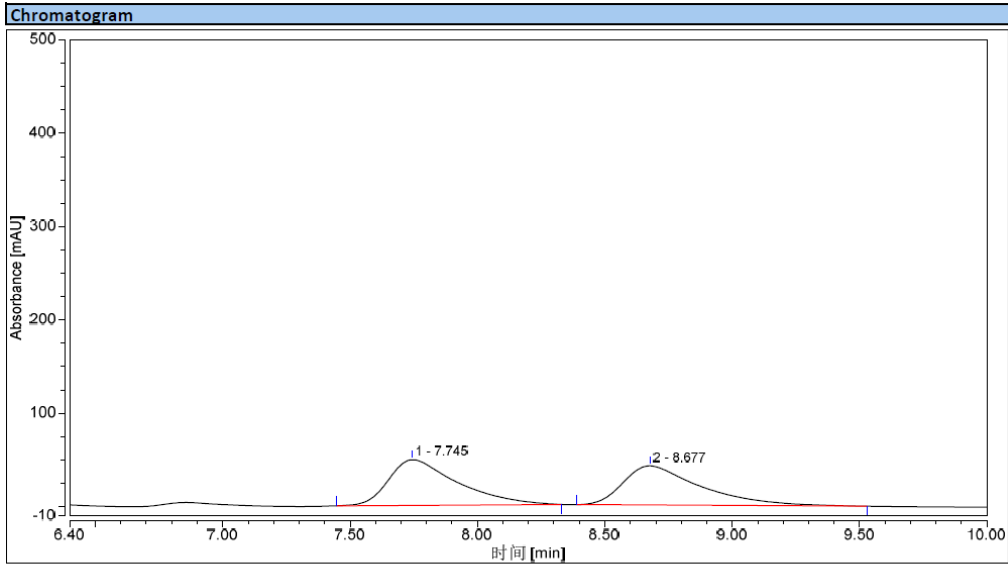

**Integration Results**

| No.           | Peak Name | Retention Time min | Area mAU*min  | Height mAU    | Relative Area % | Relative Height % | Amount |
|---------------|-----------|--------------------|---------------|---------------|-----------------|-------------------|--------|
| 1             |           | 7.745              | 15.240        | 48.806        | 50.87           | 53.82             | n.a.   |
| 2             |           | 8.677              | 14.719        | 41.873        | 49.13           | 46.18             | n.a.   |
| <b>Total:</b> |           |                    | <b>29.959</b> | <b>90.680</b> | <b>100.00</b>   | <b>100.00</b>     |        |

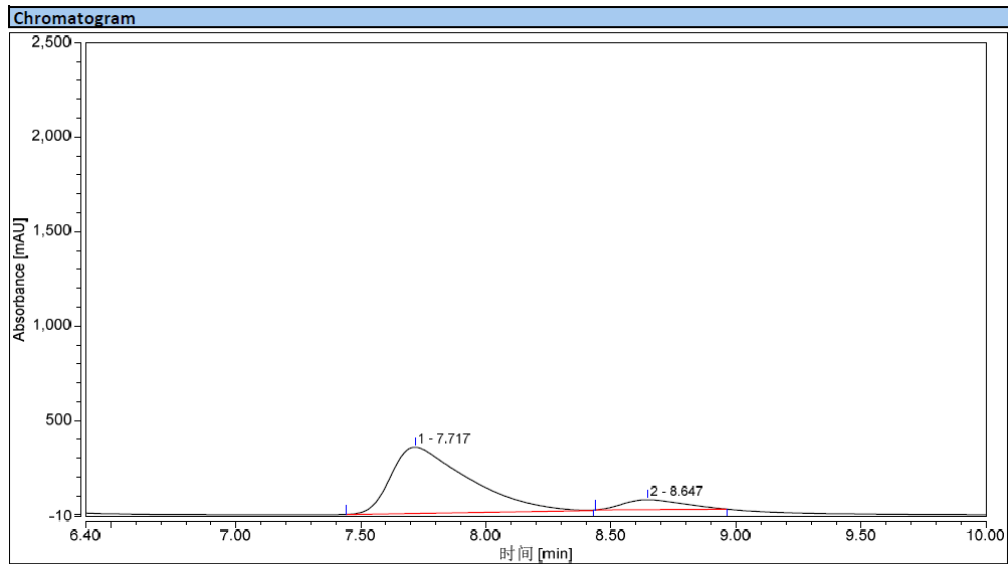

**Integration Results**

| No.           | Peak Name | Retention Time min | Area mAU*min   | Height mAU     | Relative Area % | Relative Height % | Amount |
|---------------|-----------|--------------------|----------------|----------------|-----------------|-------------------|--------|
| 1             |           | 7.717              | 125.891        | 350.574        | 89.86           | 87.14             | n.a.   |
| 2             |           | 8.647              | 14.211         | 51.717         | 10.14           | 12.86             | n.a.   |
| <b>Total:</b> |           |                    | <b>140.102</b> | <b>402.291</b> | <b>100.00</b>   | <b>100.00</b>     |        |

Compound **2y**: HPLC (IC, *n*-hexane/2-propanol = 80/20,  $v = 1.0$  mL/min,  $\lambda = 254$  nm)

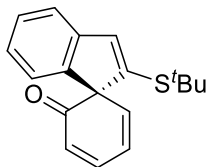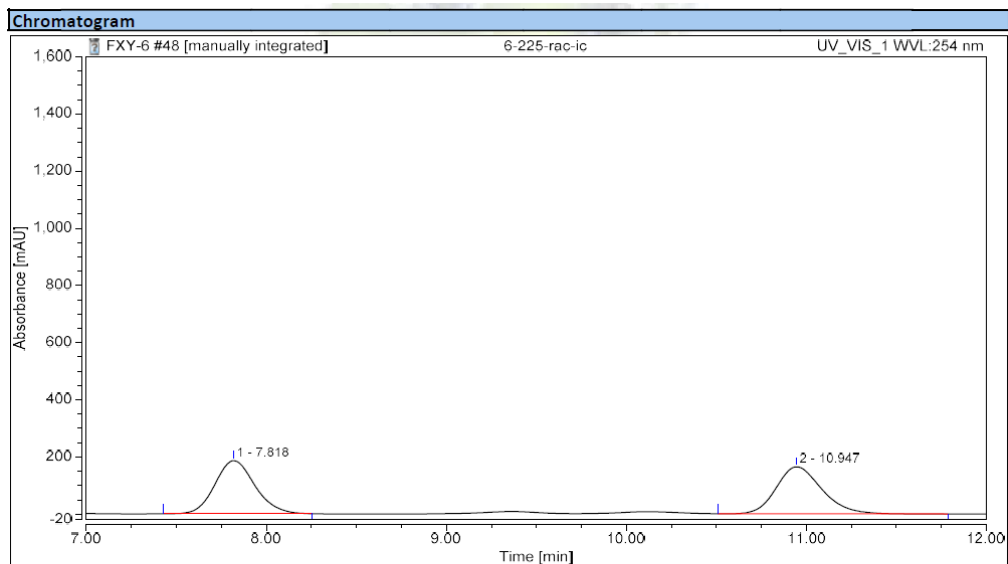

**Integration Results**

| No.           | Peak Name | Retention Time min | Area mAU*min  | Height mAU     | Relative Area % | Relative Height % | Amount |
|---------------|-----------|--------------------|---------------|----------------|-----------------|-------------------|--------|
| 1             |           | 7.818              | 47.640        | 185.405        | 49.73           | 53.00             | n.a.   |
| 2             |           | 10.947             | 48.160        | 164.383        | 50.27           | 47.00             | n.a.   |
| <b>Total:</b> |           |                    | <b>95.800</b> | <b>349.787</b> | <b>100.00</b>   | <b>100.00</b>     |        |

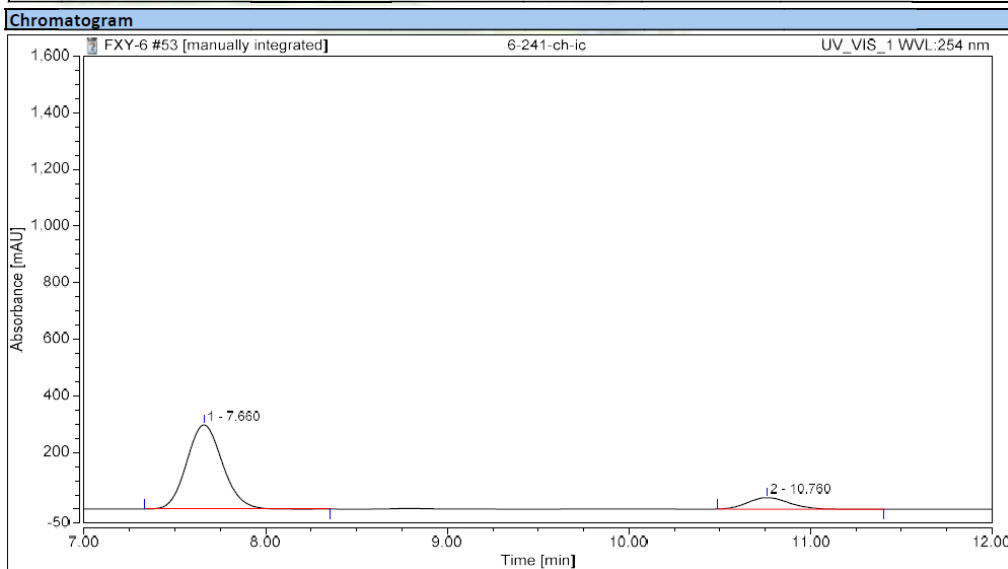

**Integration Results**

| No.           | Peak Name | Retention Time min | Area mAU*min  | Height mAU     | Relative Area % | Relative Height % | Amount |
|---------------|-----------|--------------------|---------------|----------------|-----------------|-------------------|--------|
| 1             |           | 7.660              | 67.955        | 297.563        | 86.17           | 87.93             | n.a.   |
| 2             |           | 10.760             | 10.906        | 40.840         | 13.83           | 12.07             | n.a.   |
| <b>Total:</b> |           |                    | <b>78.861</b> | <b>338.403</b> | <b>100.00</b>   | <b>100.00</b>     |        |

Compound **2z**: HPLC (IA, *n*-hexane/2-propanol = 80/20,  $v = 1.0$  mL/min,  $\lambda = 254$  nm)

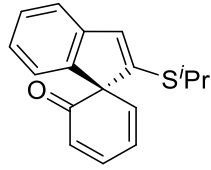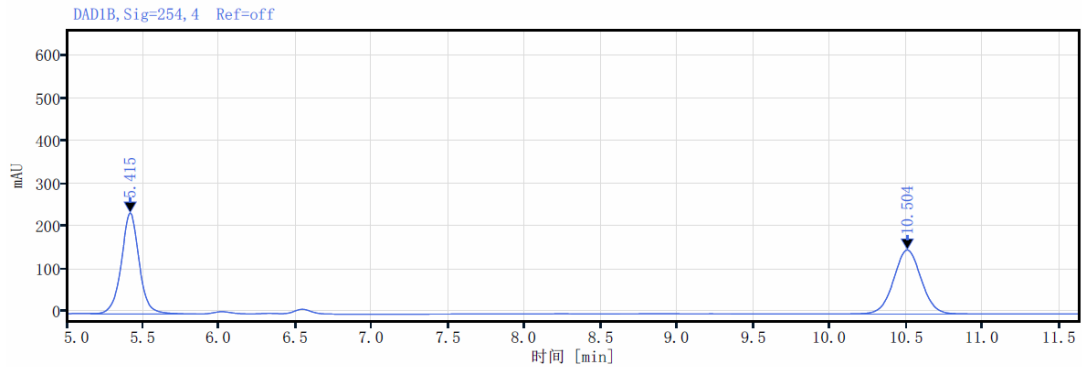

信号: DAD1B, Sig=254, 4 Ref=off

| 保留时间 [min] | 类型 | 峰宽 [min] | 峰面积     | 峰高     | 峰面积%  | 名称 |
|------------|----|----------|---------|--------|-------|----|
| 5.415      | VB | 0.69     | 1932.12 | 236.74 | 50.73 |    |
| 10.504     | BB | 1.49     | 1876.75 | 149.94 | 49.27 |    |
| 总和         |    |          | 3808.86 |        |       |    |

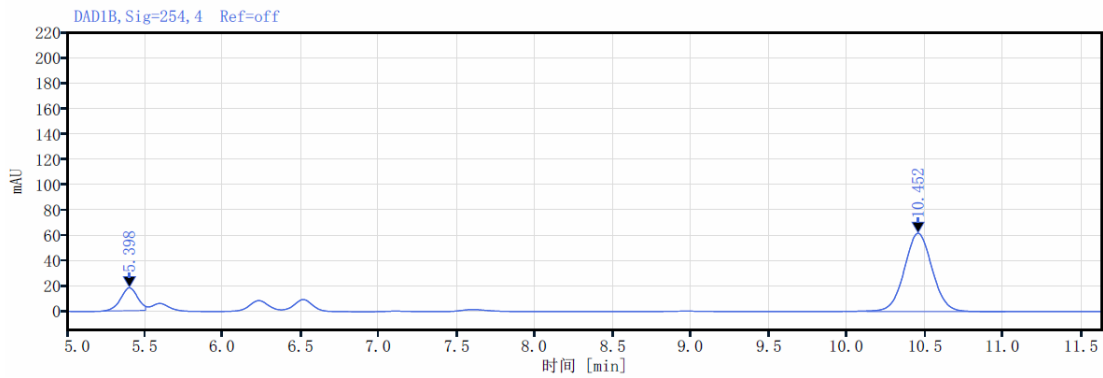

信号: DAD1B, Sig=254, 4 Ref=off

| 保留时间 [min] | 类型   | 峰宽 [min] | 峰面积    | 峰高    | 峰面积%  | 名称 |
|------------|------|----------|--------|-------|-------|----|
| 5.398      | MM m | 0.27     | 135.93 | 18.06 | 15.04 |    |
| 10.452     | MM m | 1.03     | 767.95 | 61.82 | 84.96 |    |
| 总和         |      |          | 903.88 |       |       |    |

Compound **2aa**: HPLC (IC, *n*-hexane/2-propanol = 80/20,  $v = 1.0$  mL/min,  $\lambda = 254$  nm)

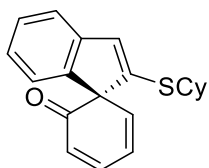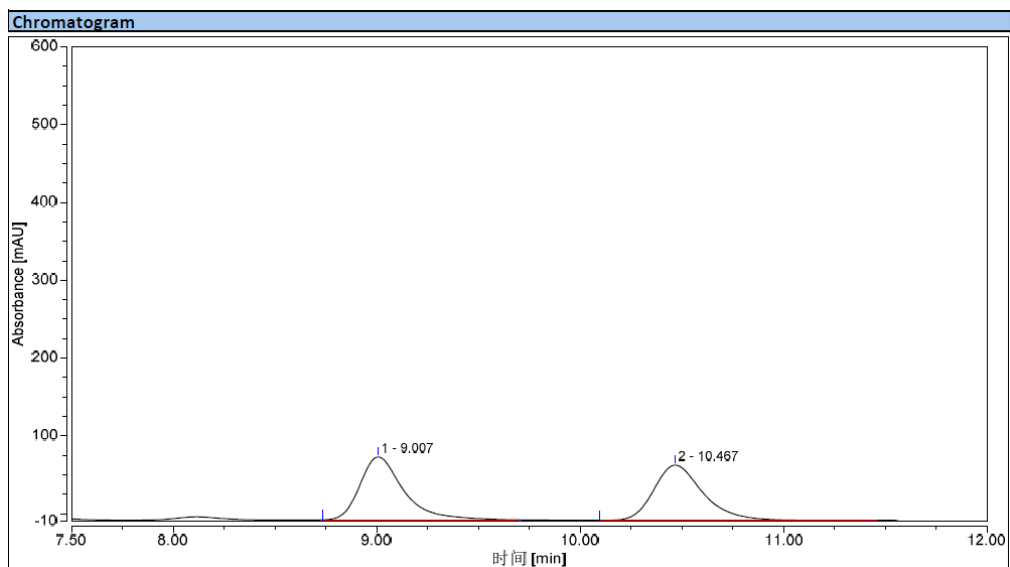

**Integration Results**

| No.           | Peak Name | Retention Time<br>min | Area<br>mAU*min | Height<br>mAU  | Relative Area<br>% | Relative Height<br>% | Amount |
|---------------|-----------|-----------------------|-----------------|----------------|--------------------|----------------------|--------|
| 1             |           | 9.007                 | 20.035          | 80.814         | 50.31              | 53.24                | n.a.   |
| 2             |           | 10.467                | 19.790          | 70.992         | 49.69              | 46.76                | n.a.   |
| <b>Total:</b> |           |                       | <b>39.825</b>   | <b>151.807</b> | <b>100.00</b>      | <b>100.00</b>        |        |

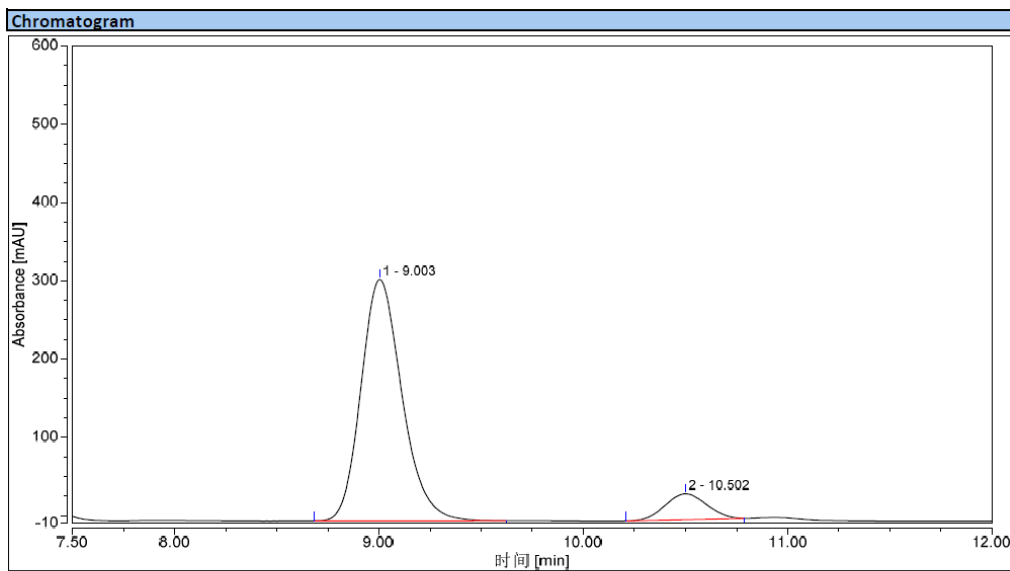

**Integration Results**

| No.           | Peak Name | Retention Time<br>min | Area<br>mAU*min | Height<br>mAU  | Relative Area<br>% | Relative Height<br>% | Amount |
|---------------|-----------|-----------------------|-----------------|----------------|--------------------|----------------------|--------|
| 1             |           | 9.003                 | 71.669          | 308.563        | 90.21              | 90.34                | n.a.   |
| 2             |           | 10.502                | 7.780           | 33.001         | 9.79               | 9.66                 | n.a.   |
| <b>Total:</b> |           |                       | <b>79.449</b>   | <b>341.563</b> | <b>100.00</b>      | <b>100.00</b>        |        |



Compound **2ab**: HPLC (IA, *n*-hexane/2-propanol = 70/30,  $v = 1.0$  mL/min,  $\lambda = 254$  nm)

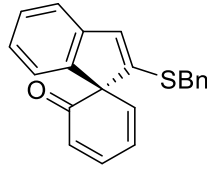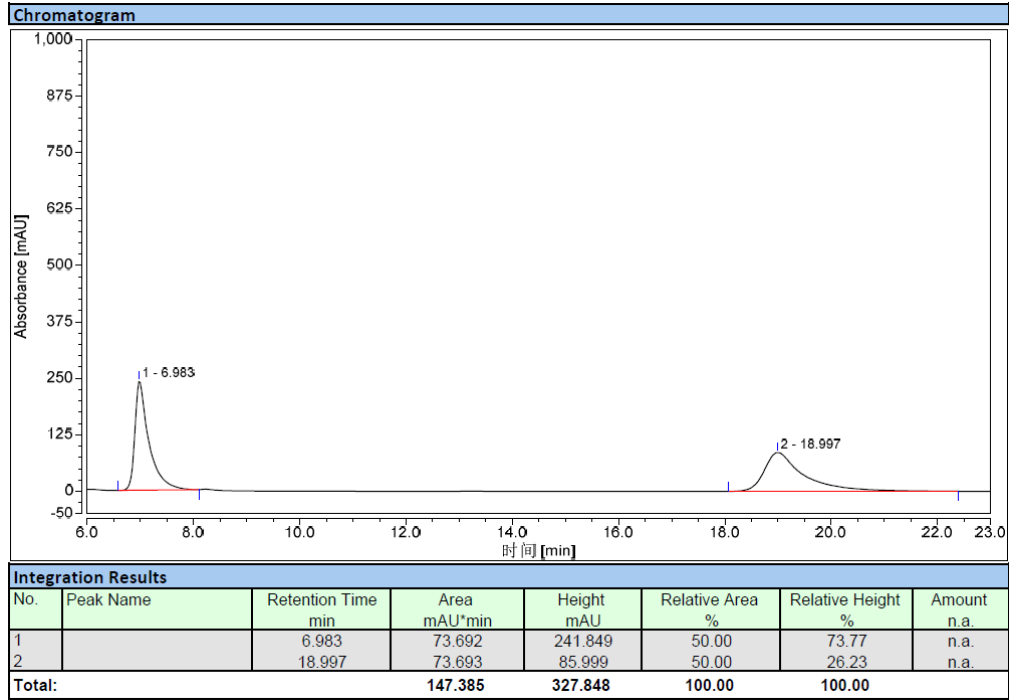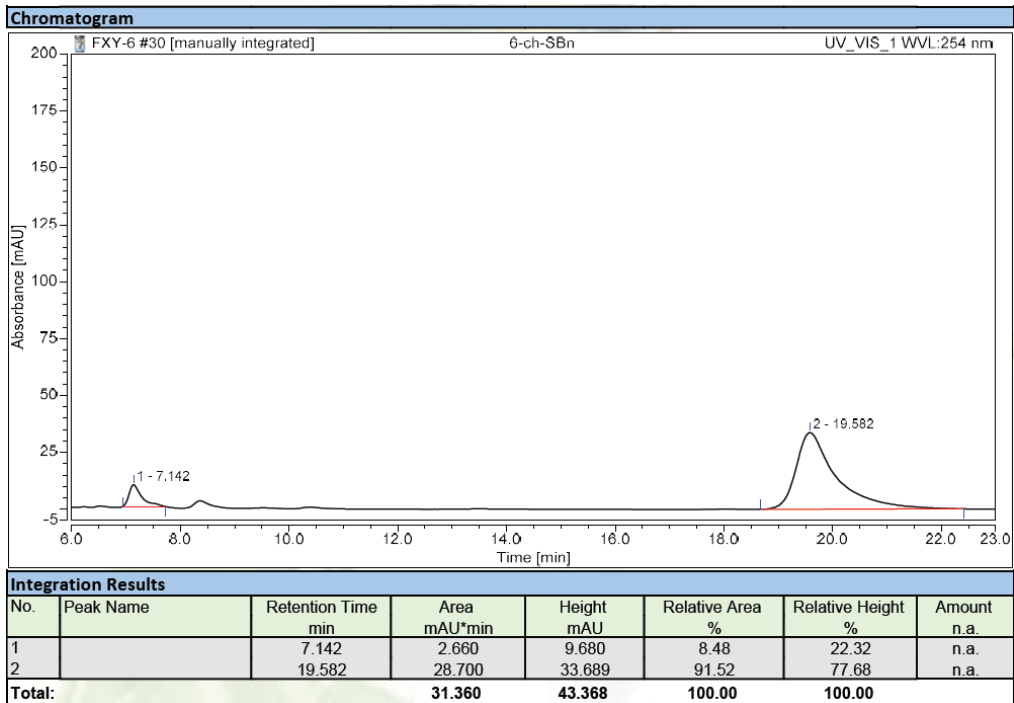

Compound **2ac**: HPLC (IC, *n*-hexane/2-propanol = 80/20,  $v = 1.0$  mL/min,  $\lambda = 254$  nm)

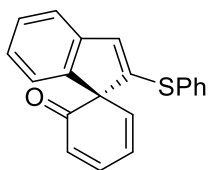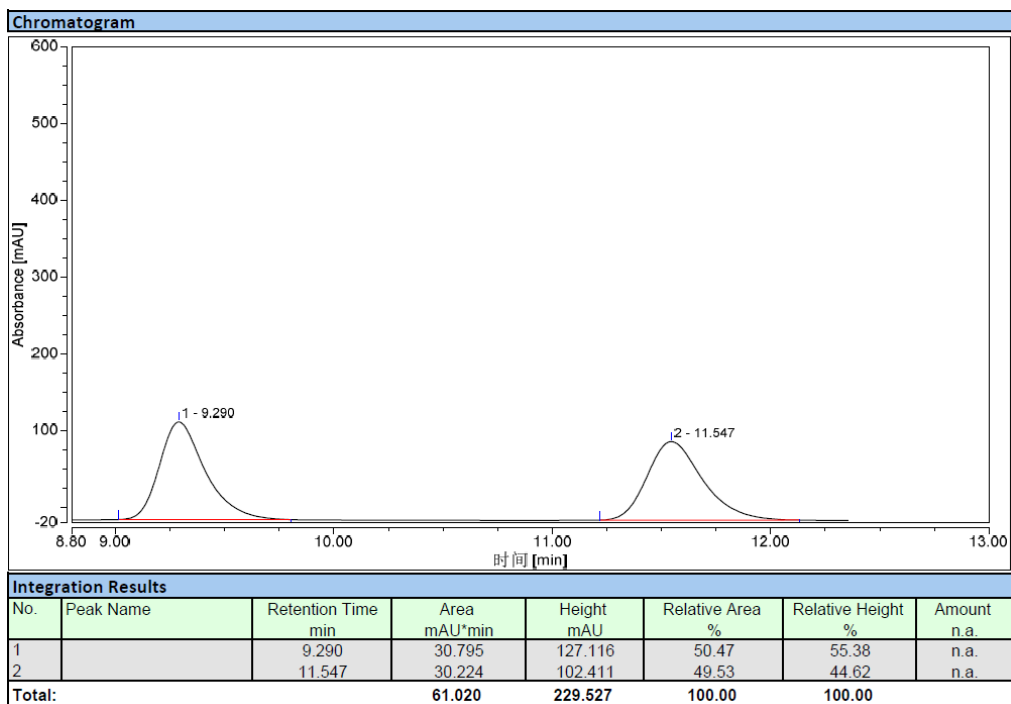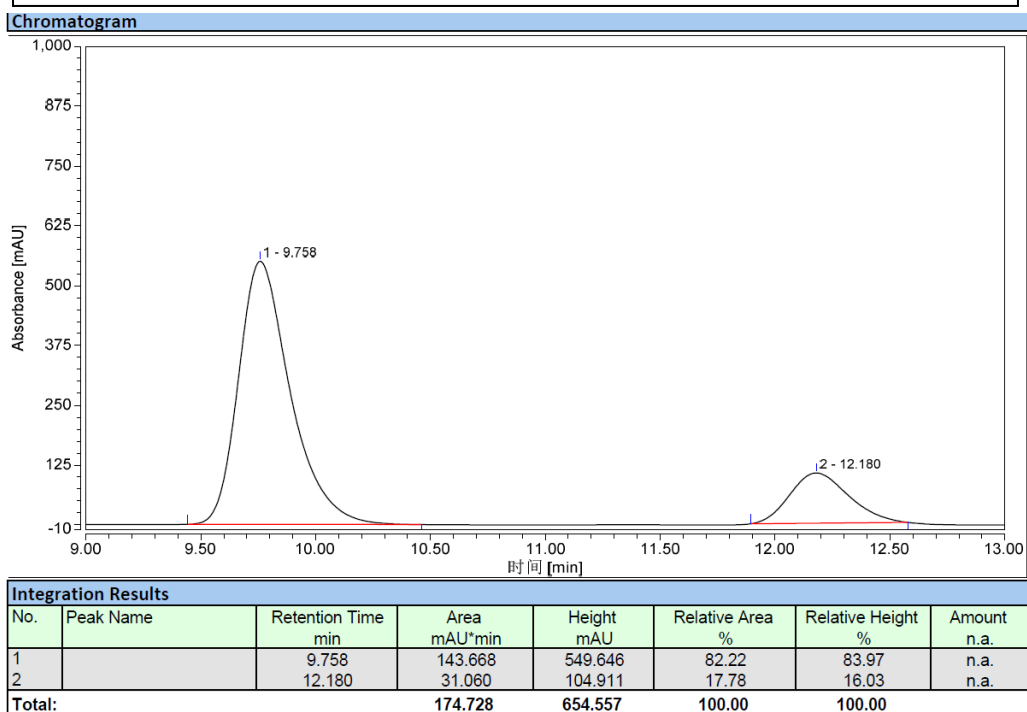

Compound 3: HPLC (IA, *n*-hexane/2-propanol = 80/20,  $v = 1.0$  mL/min,  $\lambda = 254$  nm)

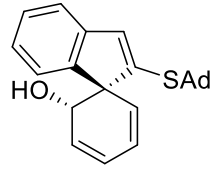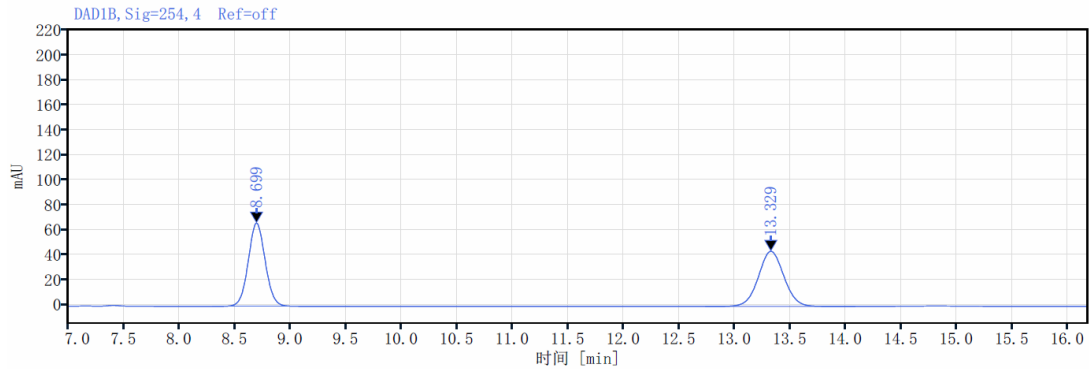

信号: DAD1B, Sig=254, 4 Ref=off

| 保留时间 [min] | 类型 | 峰宽 [min] | 峰面积     | 峰高    | 峰面积%  | 名称 |
|------------|----|----------|---------|-------|-------|----|
| 8.699      | BB | 1.23     | 711.66  | 66.76 | 50.21 |    |
| 13.329     | BB | 1.35     | 705.77  | 44.20 | 49.79 |    |
| 总和         |    |          | 1417.42 |       |       |    |

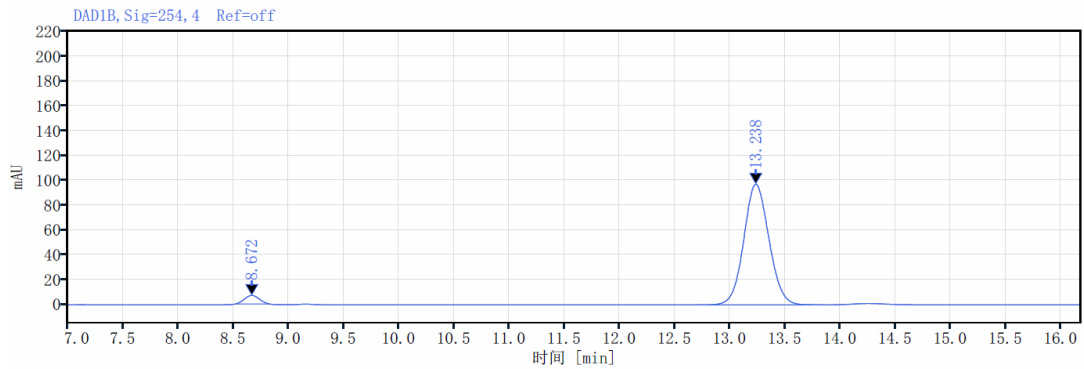

信号: DAD1B, Sig=254, 4 Ref=off

| 保留时间 [min] | 类型   | 峰宽 [min] | 峰面积     | 峰高    | 峰面积%  | 名称 |
|------------|------|----------|---------|-------|-------|----|
| 8.672      | MM m | 0.32     | 64.45   | 6.92  | 4.00  |    |
| 13.238     | BB   | 1.16     | 1546.24 | 97.39 | 96.00 |    |
| 总和         |      |          | 1610.69 |       |       |    |

Compound 4: HPLC (IA, *n*-hexane/2-propanol = 80/20,  $v = 1.0 \text{ mL/min}$ ,  $\lambda = 254 \text{ nm}$ )

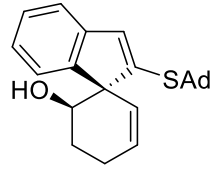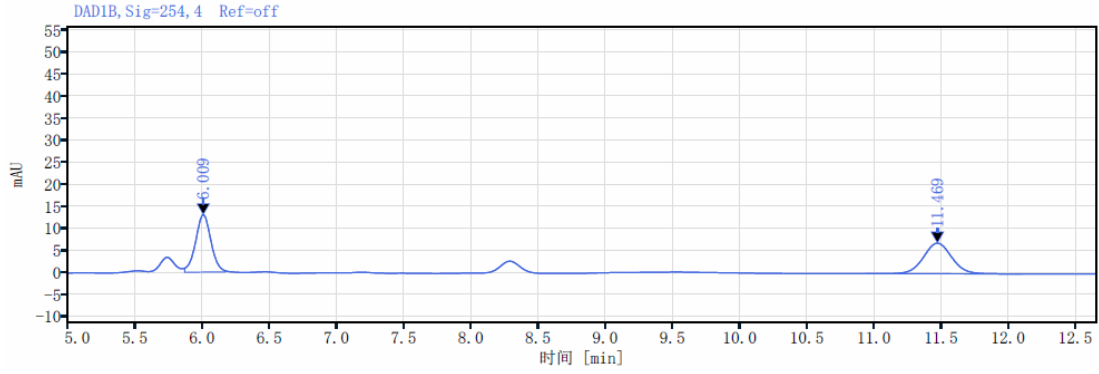

信号: DAD1B, Sig=254, 4 Ref=off

| 保留时间 [min] | 类型   | 峰宽 [min] | 峰面积    | 峰高    | 峰面积%  | 名称 |
|------------|------|----------|--------|-------|-------|----|
| 6.009      | MM m | 0.30     | 103.04 | 13.02 | 50.39 |    |
| 11.469     | MM m | 1.17     | 101.44 | 6.96  | 49.61 |    |
| 总和         |      |          | 204.48 |       |       |    |

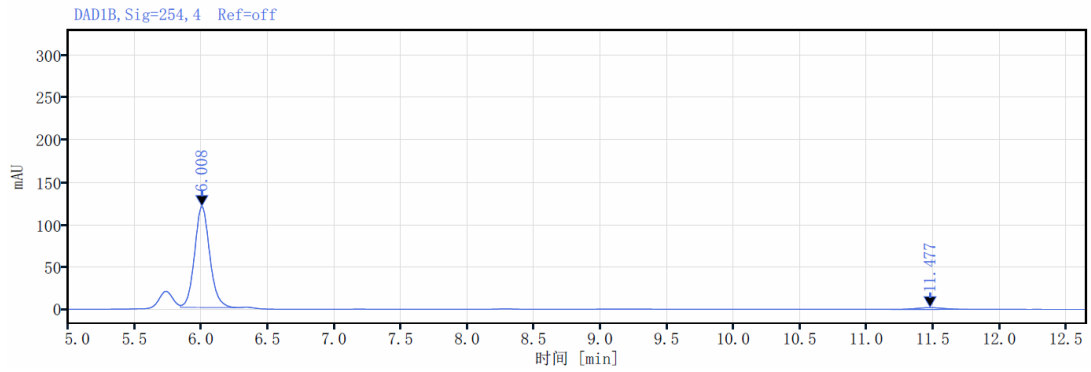

信号: DAD1B, Sig=254, 4 Ref=off

| 保留时间 [min] | 类型   | 峰宽 [min] | 峰面积    | 峰高     | 峰面积%  | 名称 |
|------------|------|----------|--------|--------|-------|----|
| 6.008      | MM m | 0.42     | 946.21 | 119.66 | 96.79 |    |
| 11.477     | MM m | 0.58     | 31.40  | 2.09   | 3.21  |    |
| 总和         |      |          | 977.61 |        |       |    |

Compound 5: HPLC (IA, *n*-hexane/2-propanol = 80/20,  $v = 1.0$  mL/min,  $\lambda = 254$  nm)

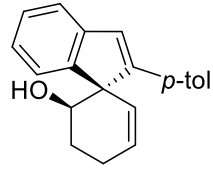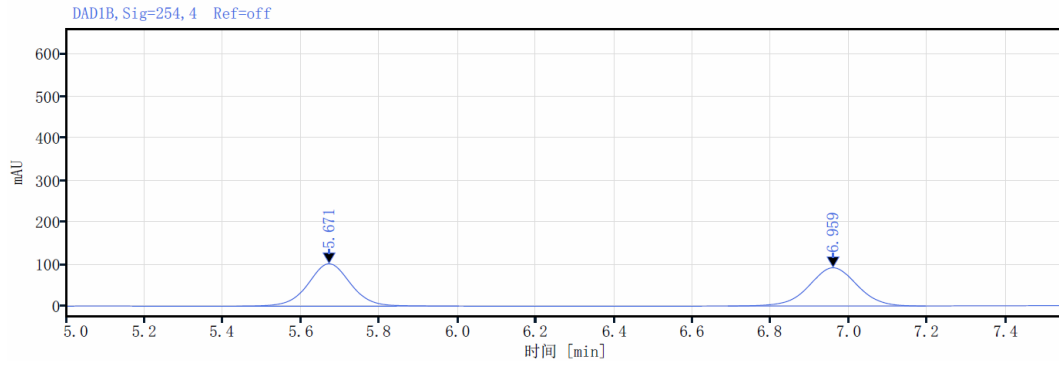

信号: DAD1B, Sig=254, 4 Ref=off

| 保留时间 [min] | 类型   | 峰宽 [min] | 峰面积     | 峰高     | 峰面积%  | 名称 |
|------------|------|----------|---------|--------|-------|----|
| 5.671      | MM m | 0.57     | 761.16  | 100.89 | 49.41 |    |
| 6.959      | MM m | 0.51     | 779.49  | 91.12  | 50.59 |    |
| 总和         |      |          | 1540.64 |        |       |    |

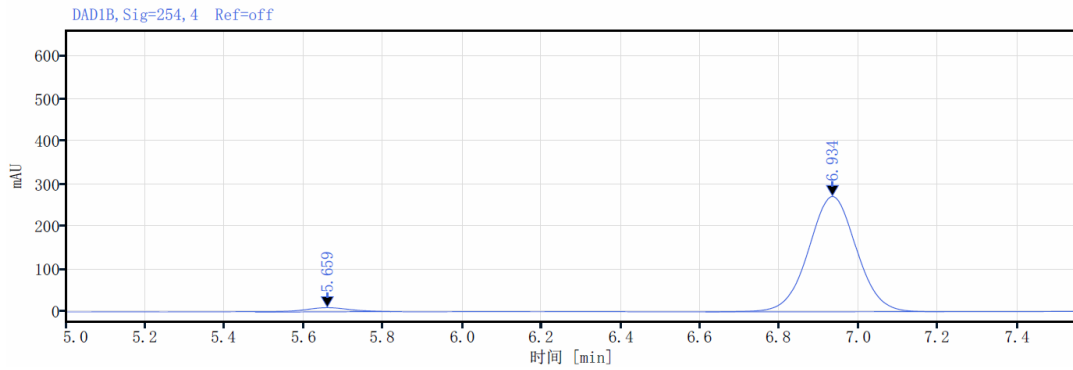

信号: DAD1B, Sig=254, 4 Ref=off

| 保留时间 [min] | 类型   | 峰宽 [min] | 峰面积     | 峰高     | 峰面积%  | 名称 |
|------------|------|----------|---------|--------|-------|----|
| 5.659      | MM m | 0.34     | 81.70   | 9.88   | 3.46  |    |
| 6.934      | MM m | 0.60     | 2276.64 | 270.77 | 96.54 |    |
| 总和         |      |          | 2358.34 |        |       |    |

Compound 6: HPLC (IA, *n*-hexane/2-propanol = 80/20,  $v = 1.0$  mL/min,  $\lambda = 254$  nm)

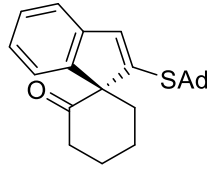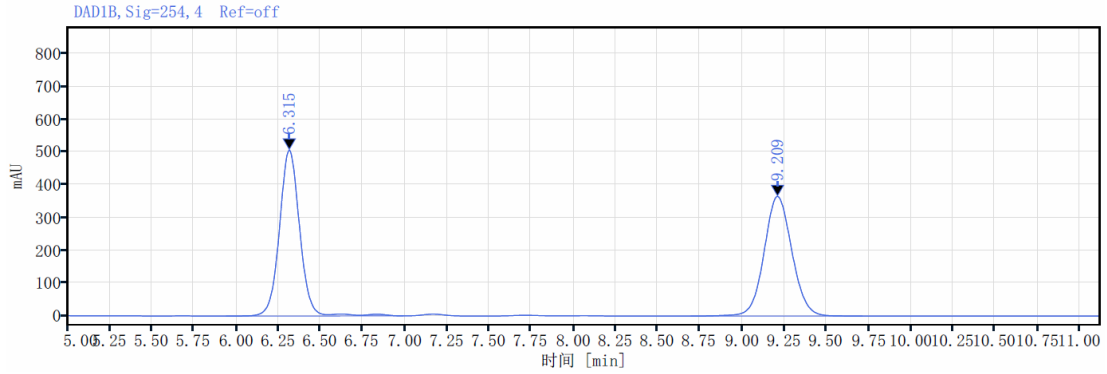

信号: DAD1B, Sig=254, 4 Ref=off

| 保留时间 [min] | 类型   | 峰宽 [min] | 峰面积     | 峰高     | 峰面积%  | 名称 |
|------------|------|----------|---------|--------|-------|----|
| 6.315      | MM m | 1.05     | 4246.79 | 506.97 | 50.35 |    |
| 9.209      | MM m | 1.02     | 4187.18 | 365.37 | 49.65 |    |
| 总和         |      |          | 8433.97 |        |       |    |

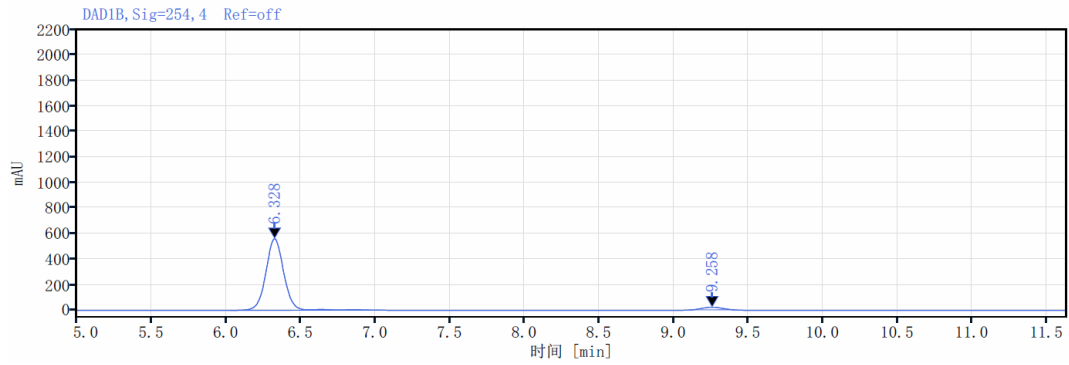

信号: DAD1B, Sig=254, 4 Ref=off

| 保留时间 [min] | 类型   | 峰宽 [min] | 峰面积     | 峰高     | 峰面积%  | 名称 |
|------------|------|----------|---------|--------|-------|----|
| 6.328      | MM m | 1.00     | 4691.63 | 560.95 | 96.02 |    |
| 9.258      | MM m | 0.29     | 194.64  | 20.90  | 3.98  |    |
| 总和         |      |          | 4886.27 |        |       |    |

Compound 7: HPLC (IA, *n*-hexane/2-propanol = 70/30,  $v = 1.0 \text{ mL/min}$ ,  $\lambda = 254 \text{ nm}$ )

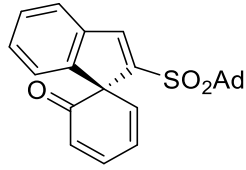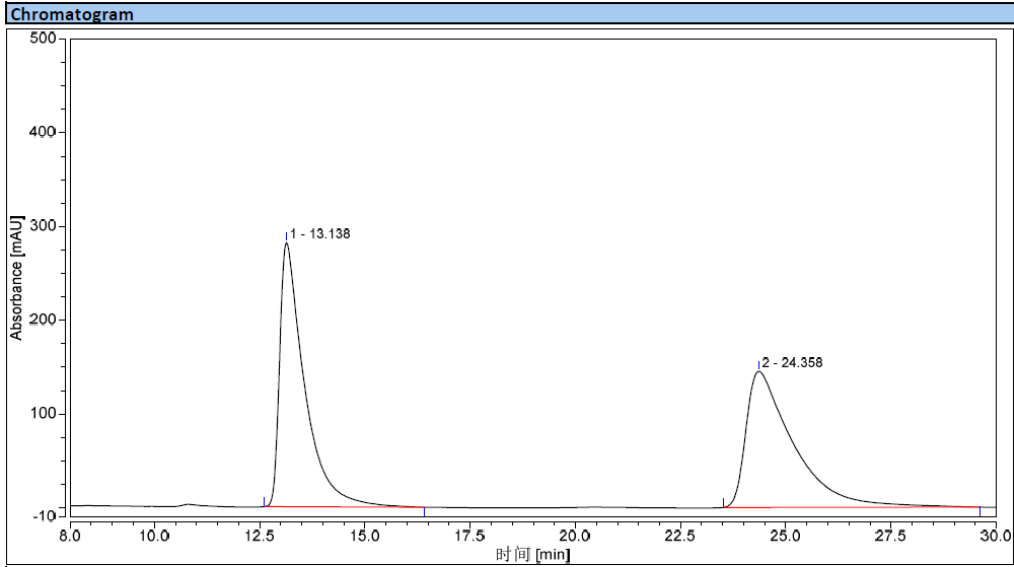

**Integration Results**

| No.           | Peak Name | Retention Time min | Area mAU*min   | Height mAU     | Relative Area % | Relative Height % | Amount |
|---------------|-----------|--------------------|----------------|----------------|-----------------|-------------------|--------|
| 1             |           | 13.138             | 192.760        | 281.895        | 50.49           | 66.01             | n.a.   |
| 2             |           | 24.358             | 189.026        | 145.173        | 49.51           | 33.99             | n.a.   |
| <b>Total:</b> |           |                    | <b>381.786</b> | <b>427.068</b> | <b>100.00</b>   | <b>100.00</b>     |        |

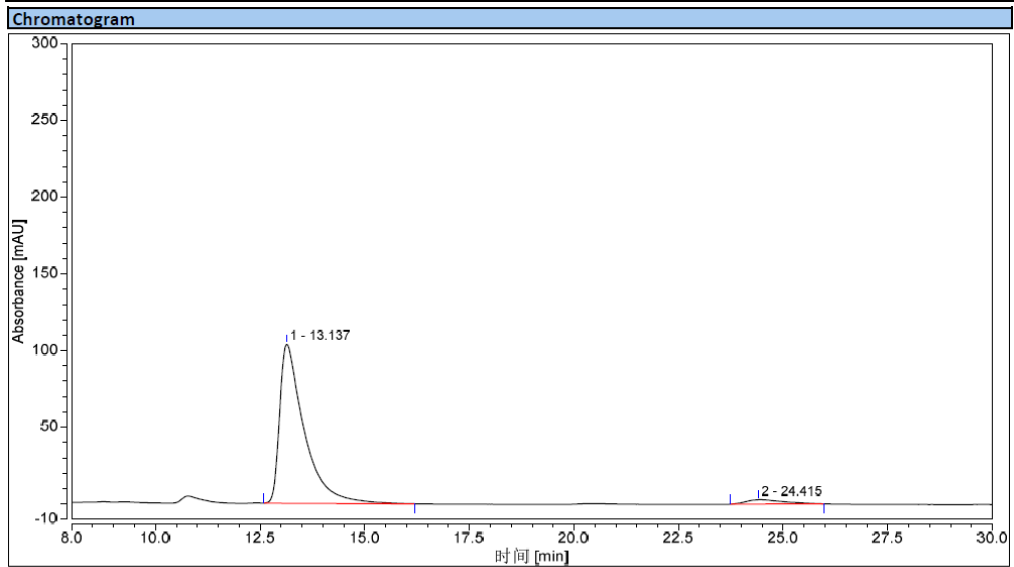

**Integration Results**

| No.           | Peak Name | Retention Time min | Area mAU*min  | Height mAU     | Relative Area % | Relative Height % | Amount |
|---------------|-----------|--------------------|---------------|----------------|-----------------|-------------------|--------|
| 1             |           | 13.137             | 70.278        | 103.688        | 96.00           | 97.34             | n.a.   |
| 2             |           | 24.415             | 2.930         | 2.835          | 4.00            | 2.66              | n.a.   |
| <b>Total:</b> |           |                    | <b>73.208</b> | <b>106.523</b> | <b>100.00</b>   | <b>100.00</b>     |        |

Compound 8: HPLC (IA, *n*-hexane/2-propanol = 80/20,  $v = 1.0$  mL/min,  $\lambda = 254$  nm)

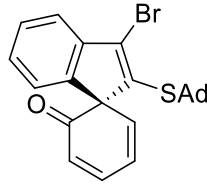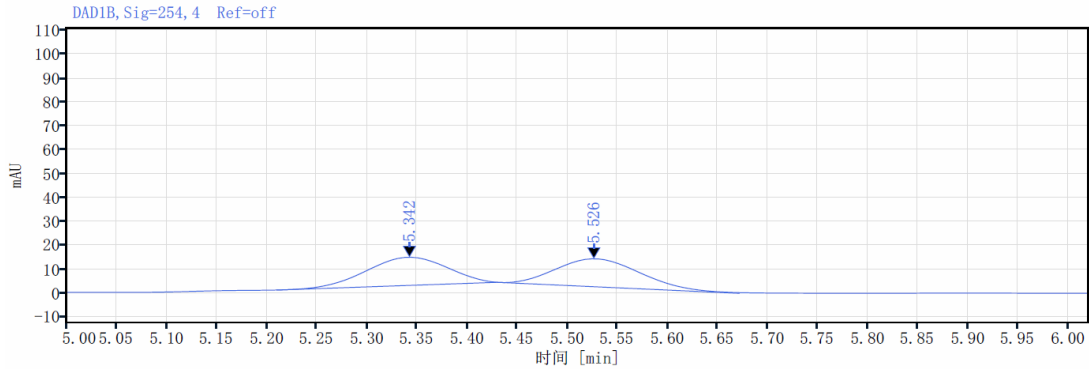

信号: DAD1B, Sig=254, 4 Ref=off

| 保留时间 [min] | 类型   | 峰宽 [min] | 峰面积    | 峰高    | 峰面积%  | 名称 |
|------------|------|----------|--------|-------|-------|----|
| 5.342      | MM m | 0.22     | 66.01  | 11.80 | 49.02 |    |
| 5.526      | MM m | 0.24     | 68.64  | 11.71 | 50.98 |    |
| 总和         |      |          | 134.65 |       |       |    |

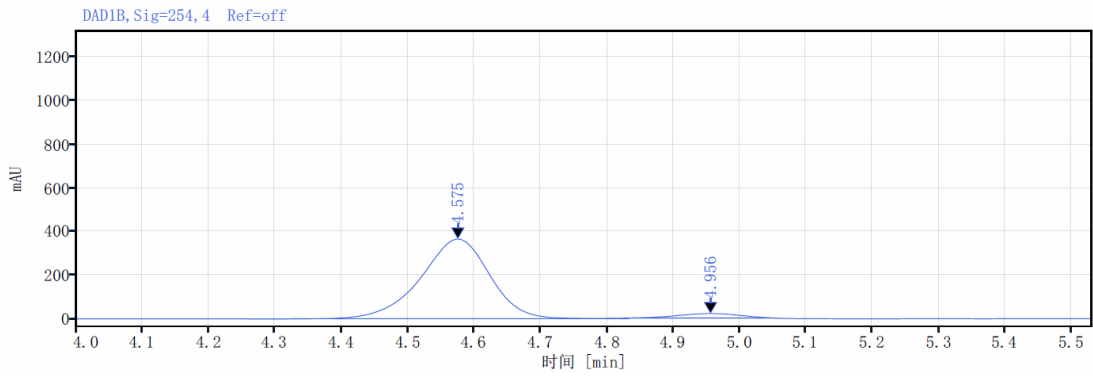

信号: DAD1B, Sig=254, 4 Ref=off

| 保留时间 [min] | 类型   | 峰宽 [min] | 峰面积     | 峰高     | 峰面积%  | 名称 |
|------------|------|----------|---------|--------|-------|----|
| 4.575      | MM m | 0.58     | 2651.60 | 366.15 | 95.50 |    |
| 4.956      | MM m | 0.21     | 124.86  | 20.03  | 4.50  |    |
| 总和         |      |          | 2776.46 |        |       |    |



7.544  
7.541  
7.536  
7.528  
7.522  
7.355  
7.339  
7.307  
7.254  
7.241  
7.234  
7.216  
7.214  
6.979  
6.961  
6.942  
6.940

5.068

1.955  
1.703  
1.697  
1.633  
1.602  
1.571  
1.540

0.000

| Parameter                | Value               |
|--------------------------|---------------------|
| 1 Title                  | FXY-13-194-1        |
| 2 Origin                 | Bruker BioSpin GmbH |
| 3 Solvent                | CDC13               |
| 4 Temperature            | 298.0               |
| 5 Number of Scans        | 11                  |
| 6 Acquisition Time       | 4.0894              |
| 7 Acquisition Date       | 2023-08-20T15:45:06 |
| 8 Spectrometer Frequency | 400.13              |
| 9 Spectral Width         | 8012.8              |

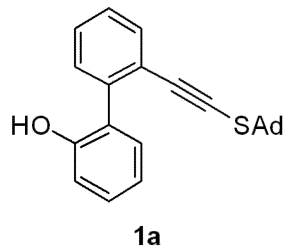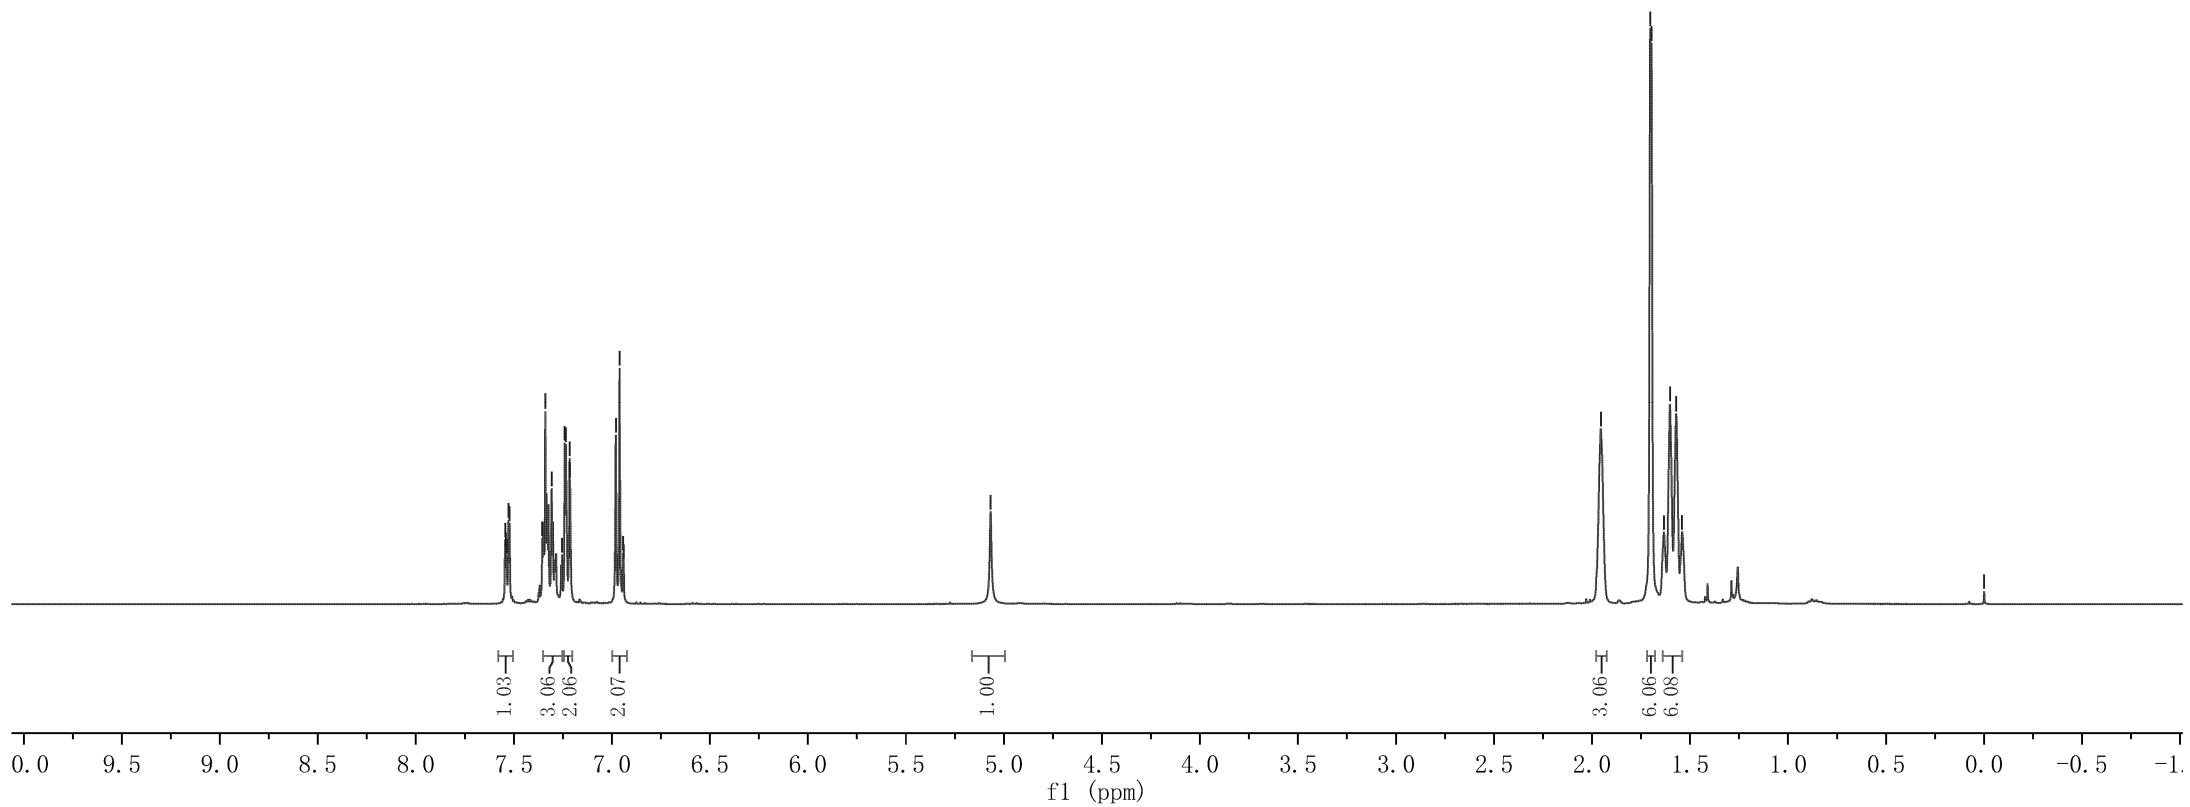

| Parameter                | Value               |
|--------------------------|---------------------|
| 1 Title                  | FXY-13-194-3        |
| 2 Origin                 | Bruker BioSpin GmbH |
| 3 Solvent                | CDC13               |
| 4 Temperature            | 300.0               |
| 5 Number of Scans        | 48                  |
| 6 Acquisition Time       | 1.3631              |
| 7 Acquisition Date       | 2023-08-20T15:51:39 |
| 8 Spectrometer Frequency | 100.61              |
| 9 Spectral Width         | 24038.5             |

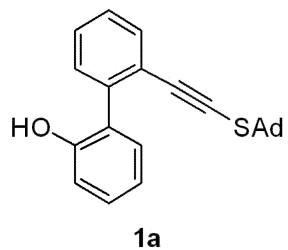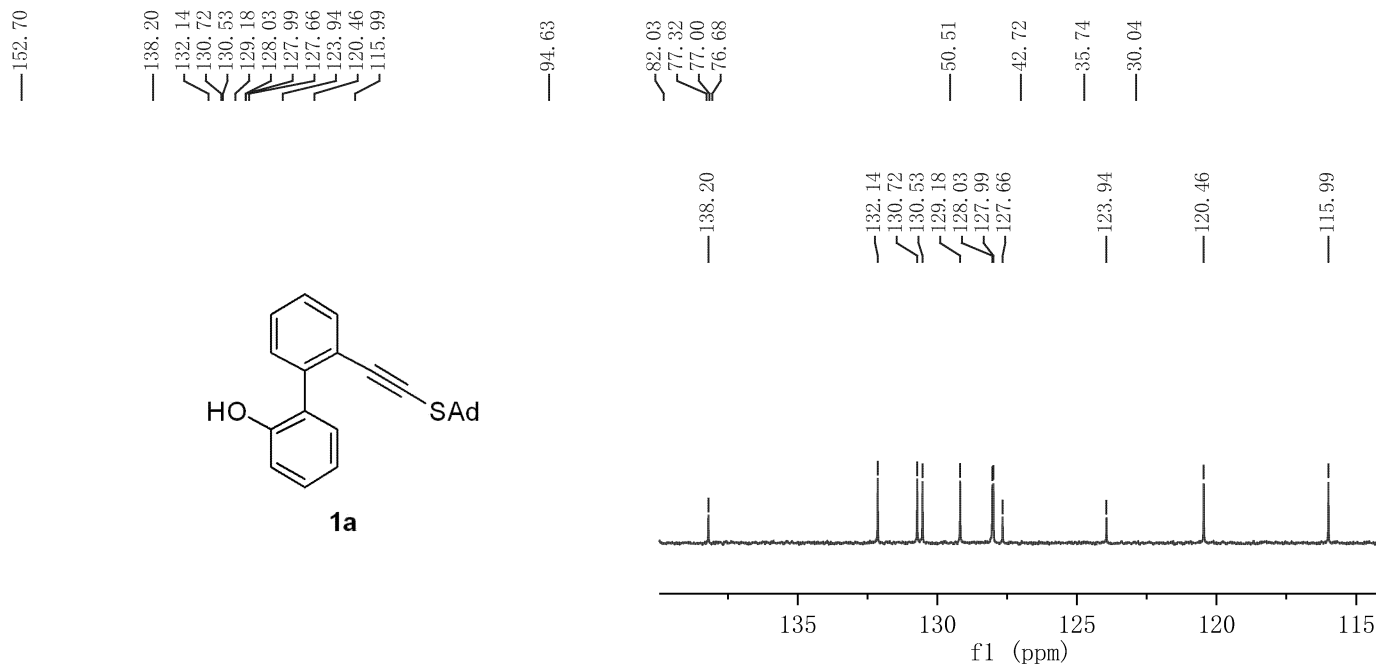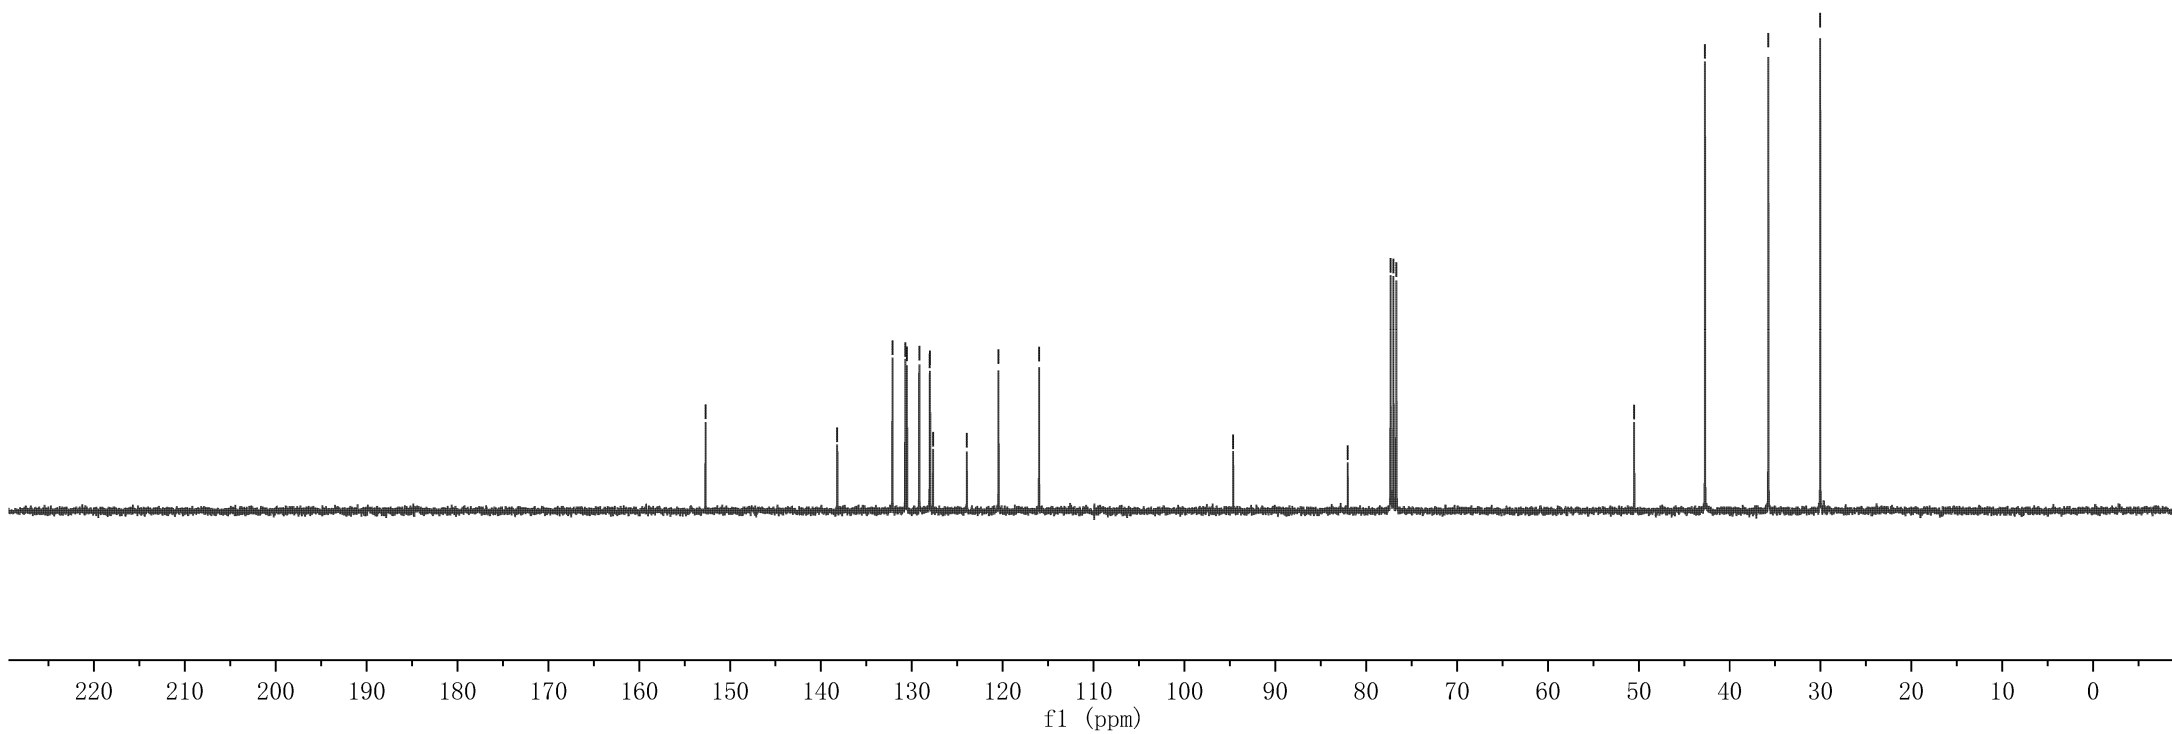

132.14  
130.73  
130.54  
129.19  
128.04  
128.00  
120.46  
116.00

| Parameter                | Value               |
|--------------------------|---------------------|
| 1 Title                  | FXY-13-194-4        |
| 2 Origin                 | Bruker BioSpin GmbH |
| 3 Solvent                | CDC13               |
| 4 Temperature            | 300.0               |
| 5 Number of Scans        | 11                  |
| 6 Acquisition Time       | 2.0316              |
| 7 Acquisition Date       | 2023-08-20T15:57:02 |
| 8 Spectrometer Frequency | 100.61              |
| 9 Spectral Width         | 16129.0             |

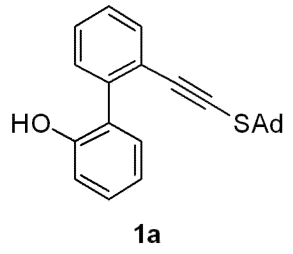

42.72  
35.75  
30.04

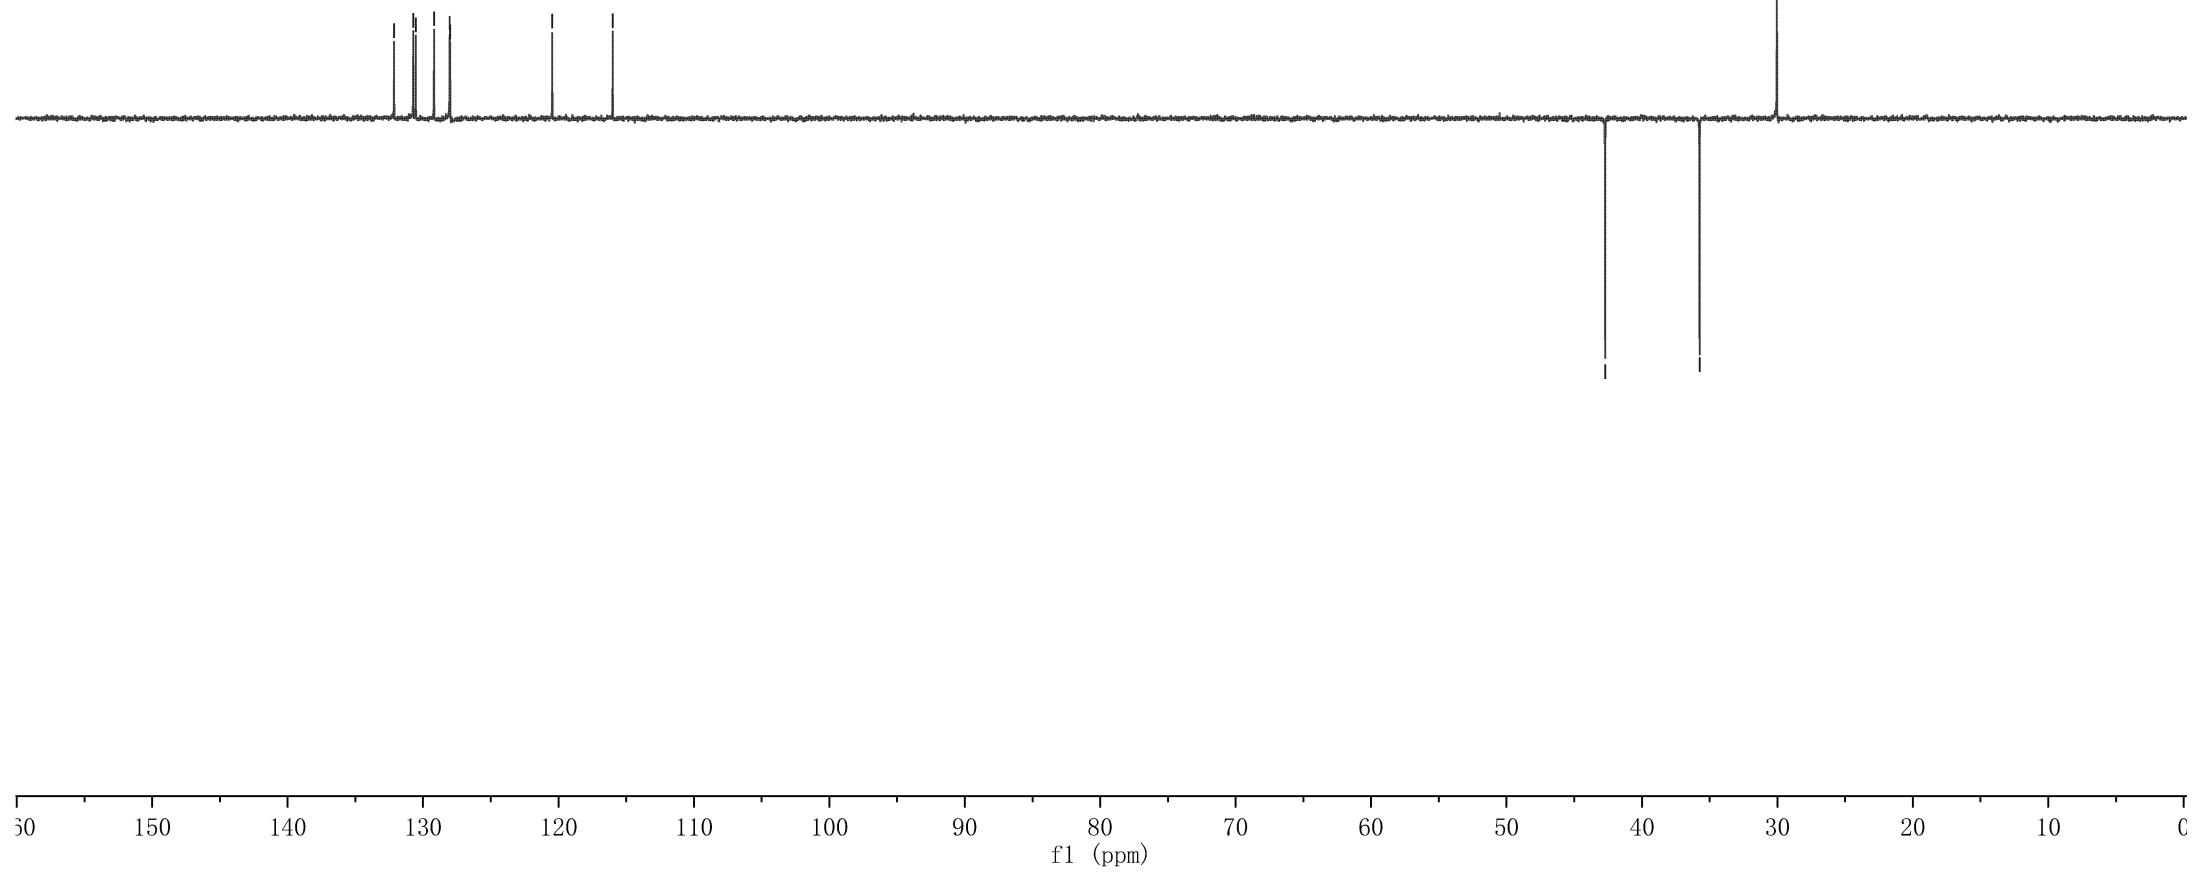

| Parameter                | Value               |
|--------------------------|---------------------|
| 1 Title                  | 1d                  |
| 2 Origin                 |                     |
| 3 Solvent                | CDC13               |
| 4 Temperature            | 295.8               |
| 5 Number of Scans        | 16                  |
| 6 Acquisition Time       | 4.0002              |
| 7 Acquisition Date       | 2022-01-13T15:45:57 |
| 8 Spectrometer Frequency | 399.93              |
| 9 Spectral Width         | 8012.0              |

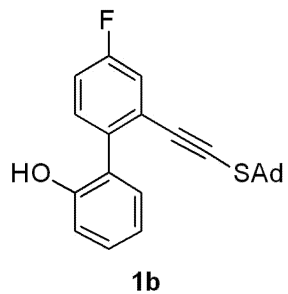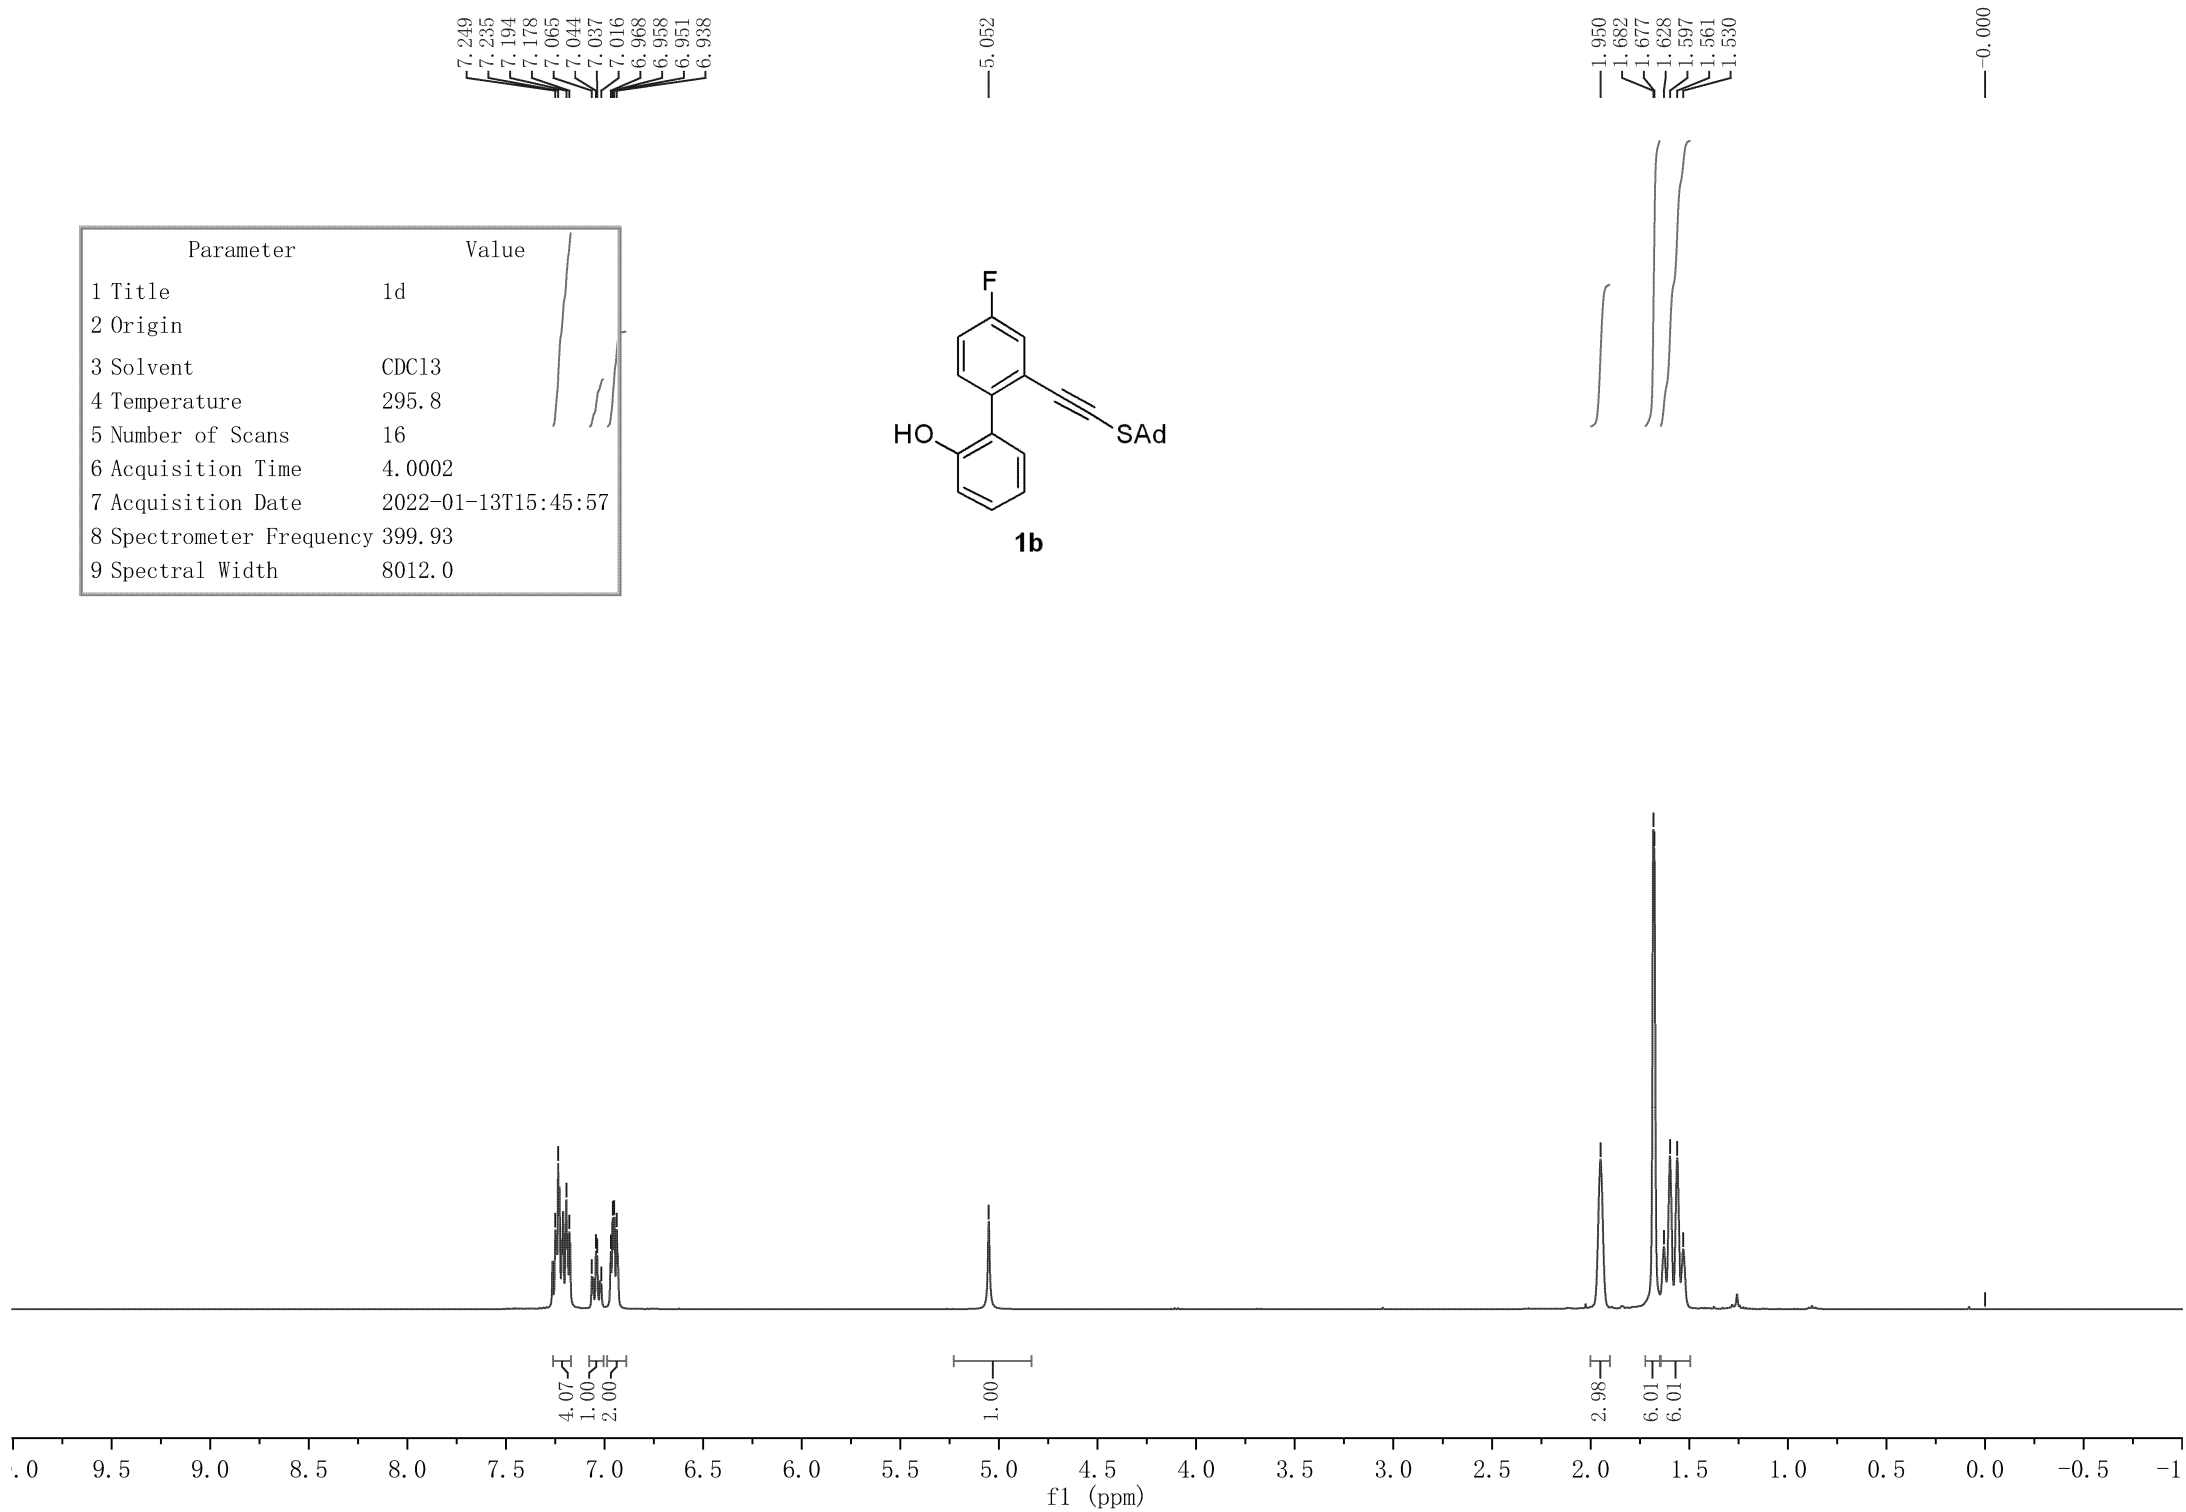

| Parameter                | Value               |
|--------------------------|---------------------|
| 1 Title                  | 1d                  |
| 2 Origin                 |                     |
| 3 Solvent                | CDC13               |
| 4 Temperature            | 296.2               |
| 5 Number of Scans        | 200                 |
| 6 Acquisition Time       | 1.0000              |
| 7 Acquisition Date       | 2022-01-13T15:54:53 |
| 8 Spectrometer Frequency | 100.56              |
| 9 Spectral Width         | 26041.0             |

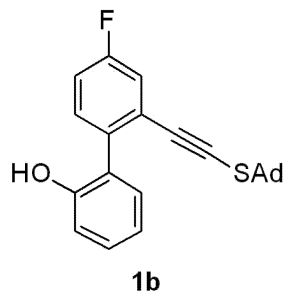

163.17  
160.70  
152.71  
134.18  
134.15  
132.25  
132.16  
130.87  
129.29  
126.67  
125.73  
125.64  
120.50  
118.43  
118.20  
115.97  
115.40  
115.18  
93.84  
93.81  
83.50  
77.32  
77.00  
76.68  
50.74  
42.67  
35.64  
29.98

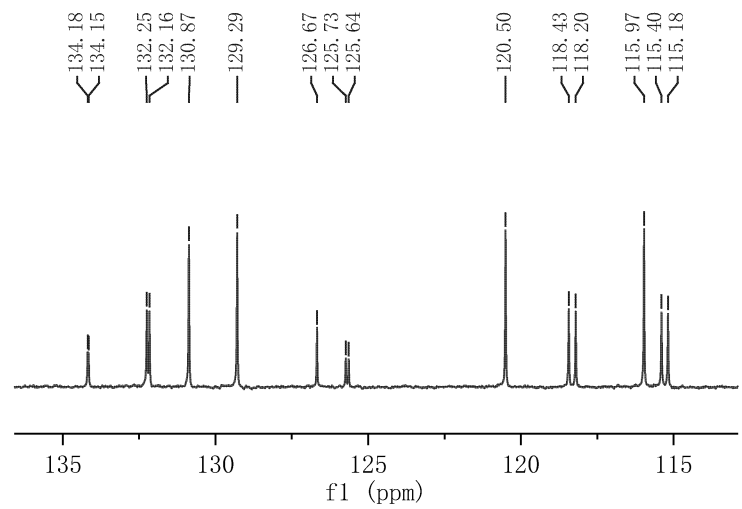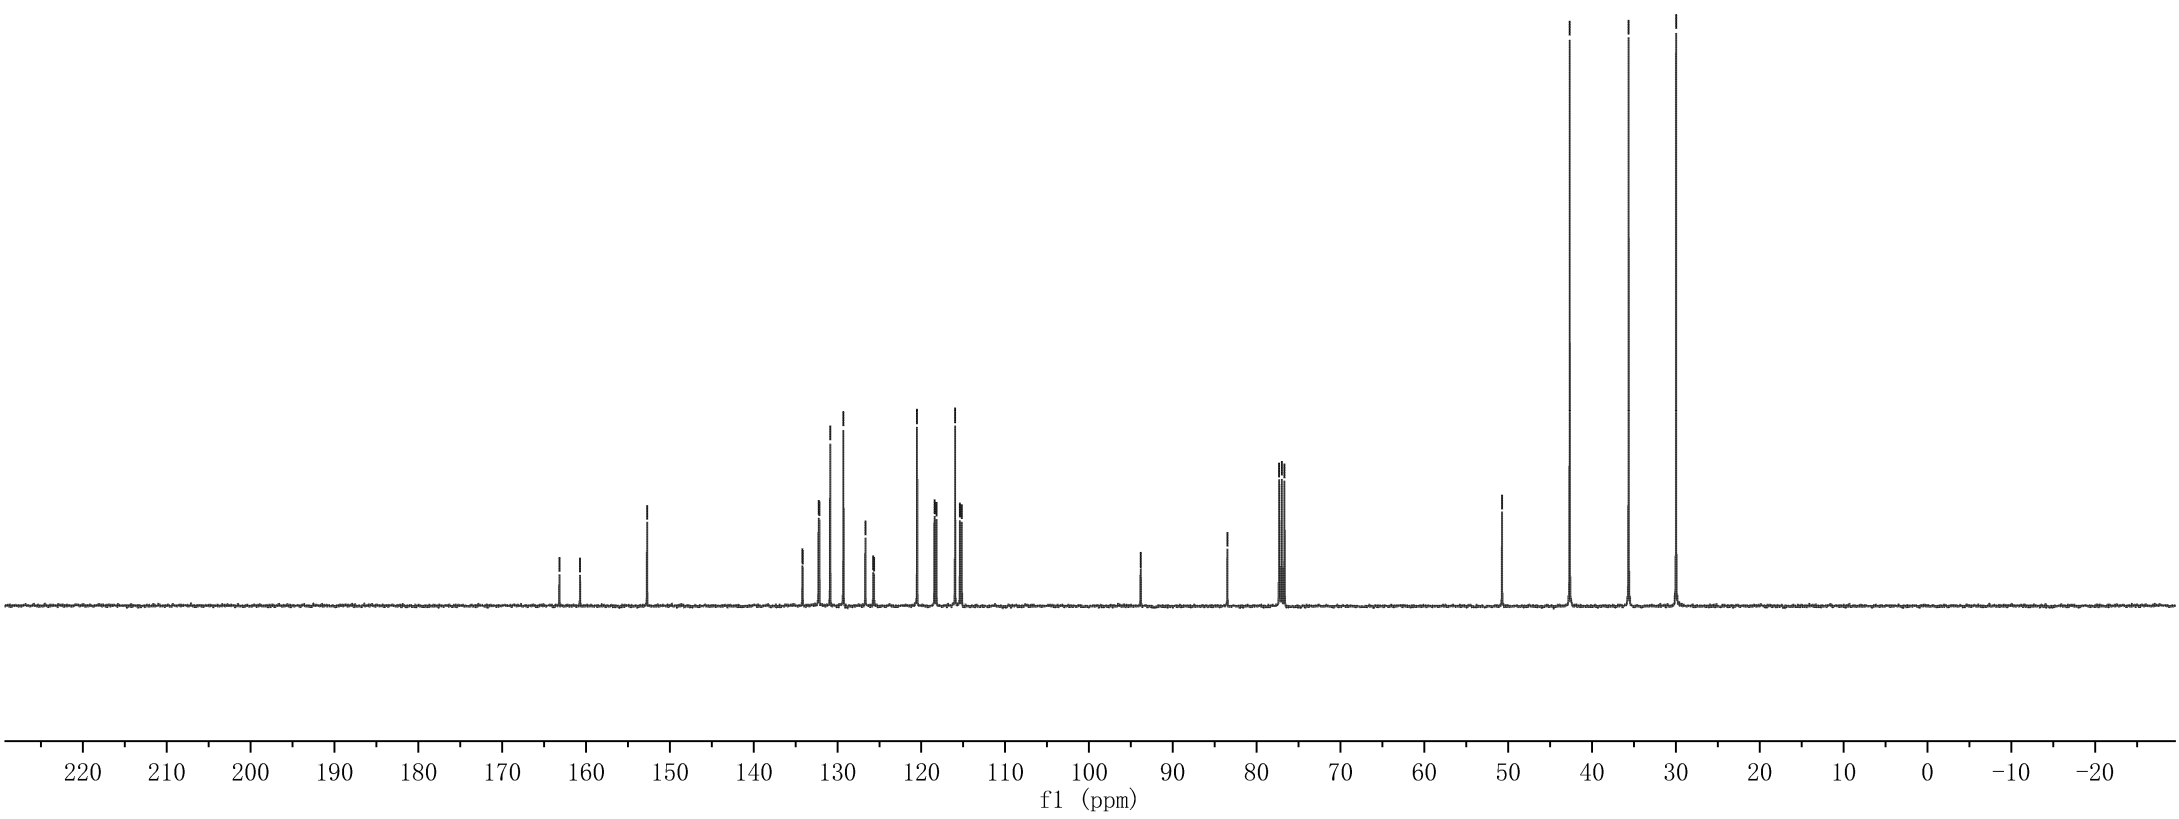

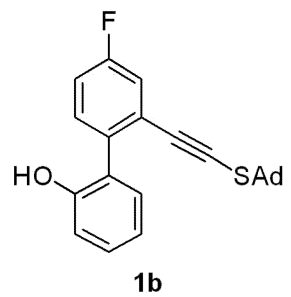

-114.74

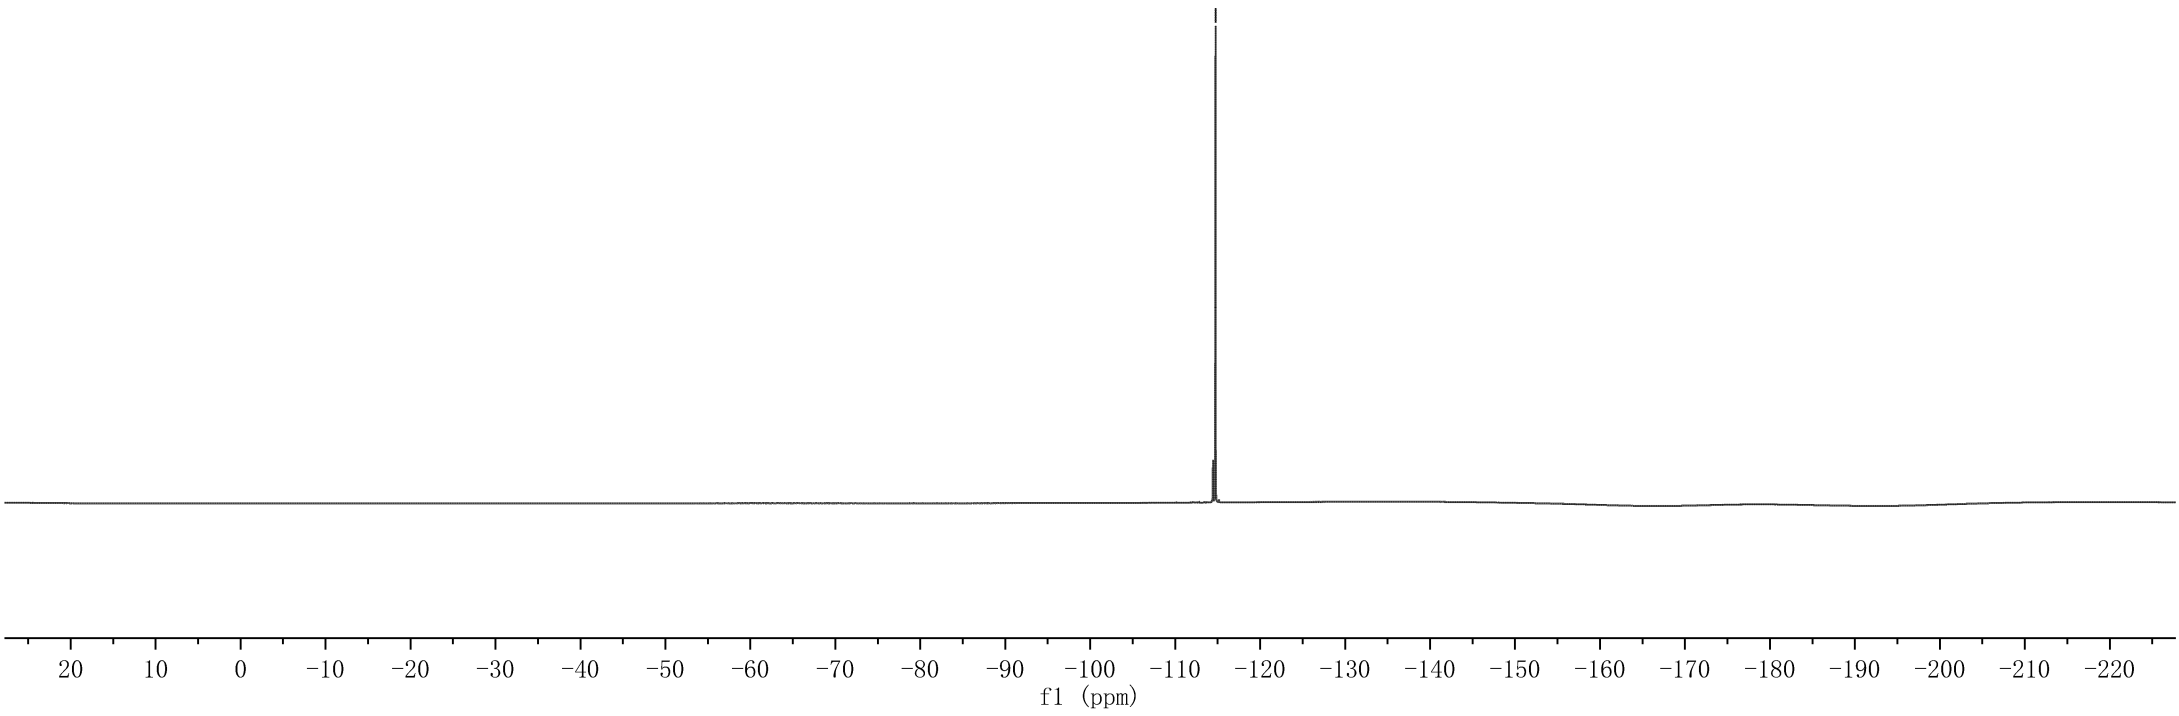

7.506  
7.501  
7.325  
7.319  
7.304  
7.299  
7.263  
7.239  
7.218  
7.185  
6.978  
6.962  
6.943

5.024

1.958  
1.695  
1.689  
1.635  
1.604  
1.566  
1.535

0.000

| Parameter                | Value               |
|--------------------------|---------------------|
| 1 Title                  | fxv-7-120           |
| 2 Origin                 | Bruker BioSpin GmbH |
| 3 Solvent                | CDC13               |
| 4 Temperature            | 298.0               |
| 5 Number of Scans        | 11                  |
| 6 Acquisition Time       | 4.0894              |
| 7 Acquisition Date       | 2022-02-17T10:28:57 |
| 8 Spectrometer Frequency | 400.13              |
| 9 Spectral Width         | 8012.8              |

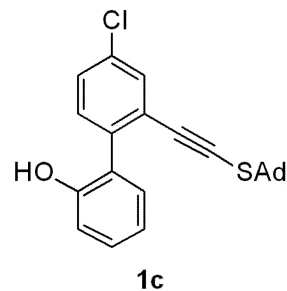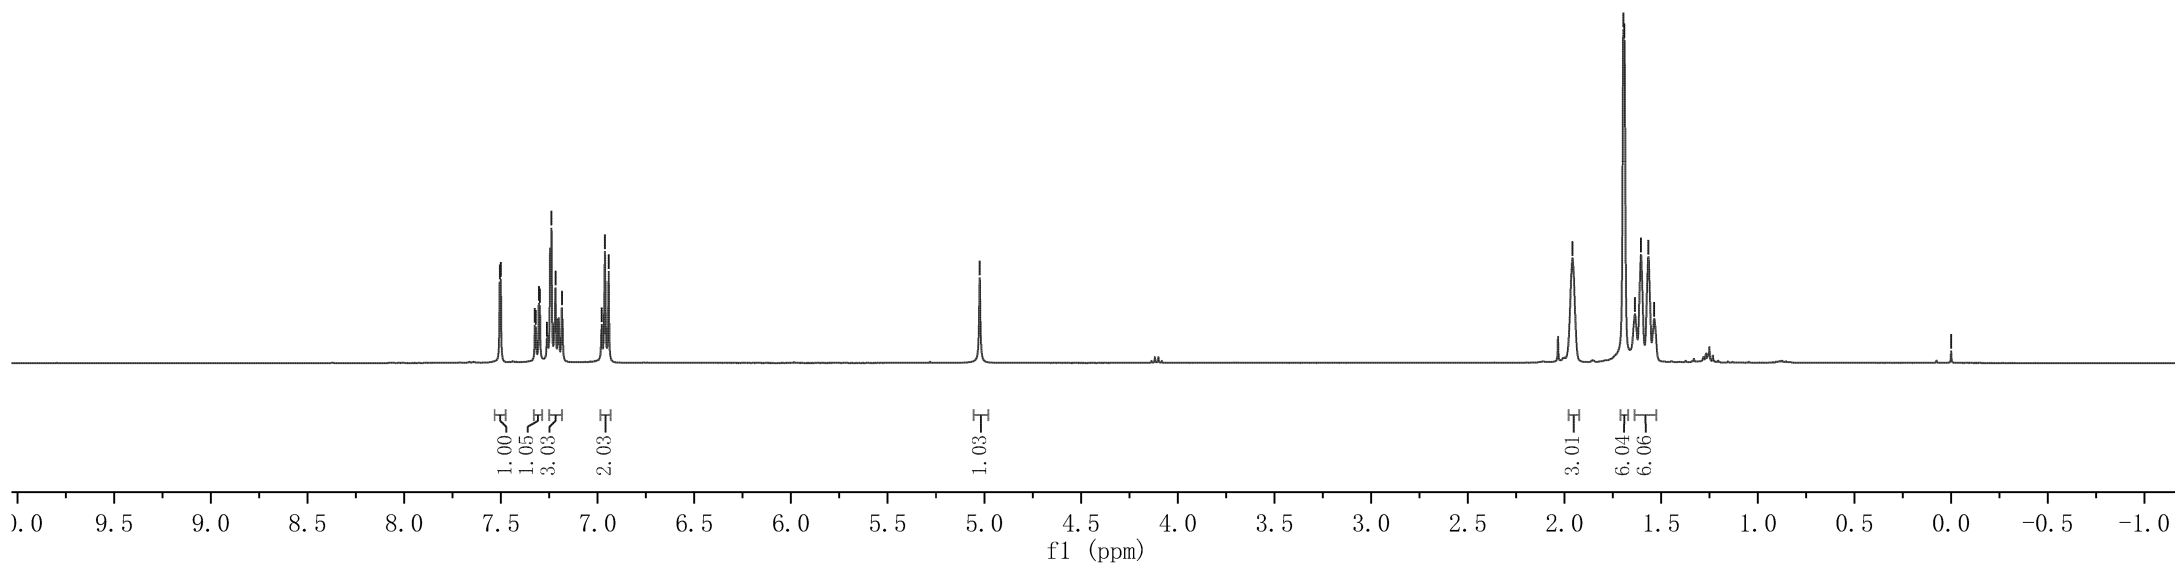

| Parameter                | Value               |
|--------------------------|---------------------|
| 1 Title                  | fxv-7-120-C         |
| 2 Origin                 | Bruker BioSpin GmbH |
| 3 Solvent                | CDC13               |
| 4 Temperature            | 300.0               |
| 5 Number of Scans        | 21                  |
| 6 Acquisition Time       | 1.3631              |
| 7 Acquisition Date       | 2022-02-17T10:30:17 |
| 8 Spectrometer Frequency | 100.61              |
| 9 Spectral Width         | 24038.5             |

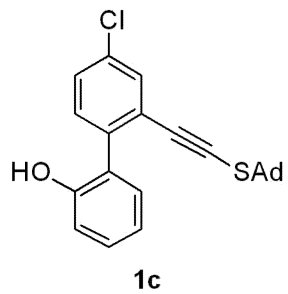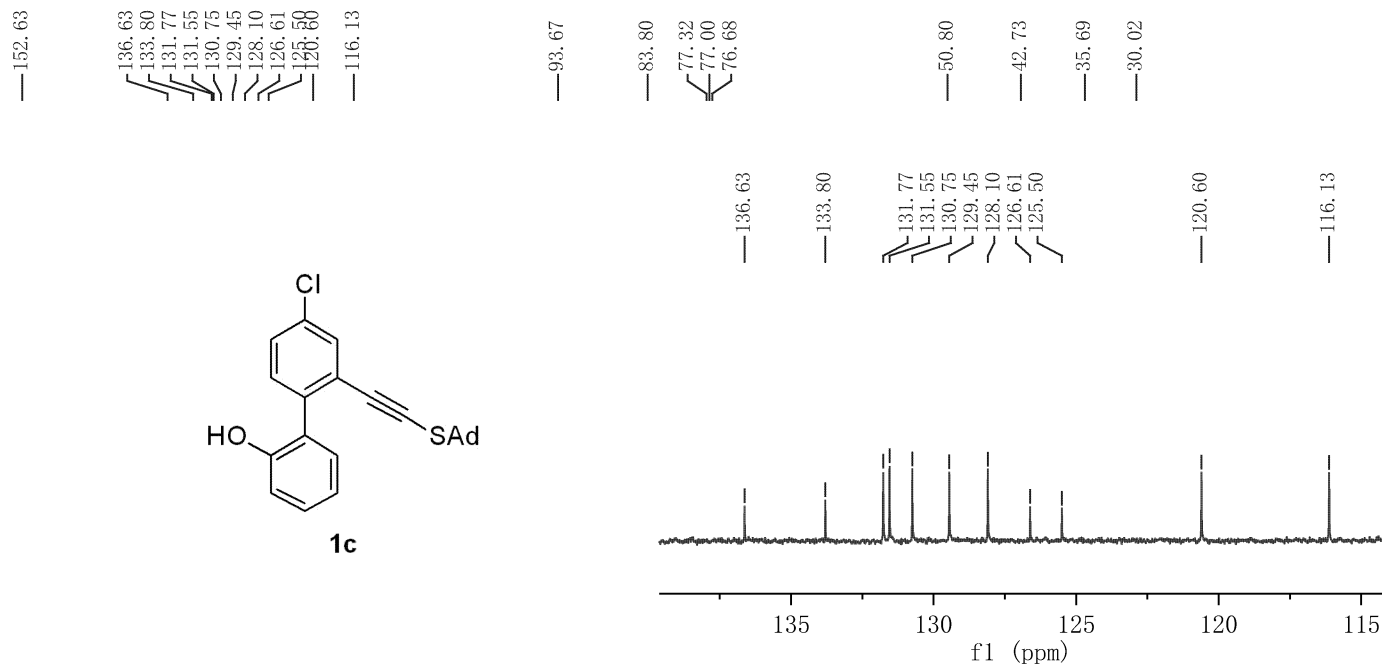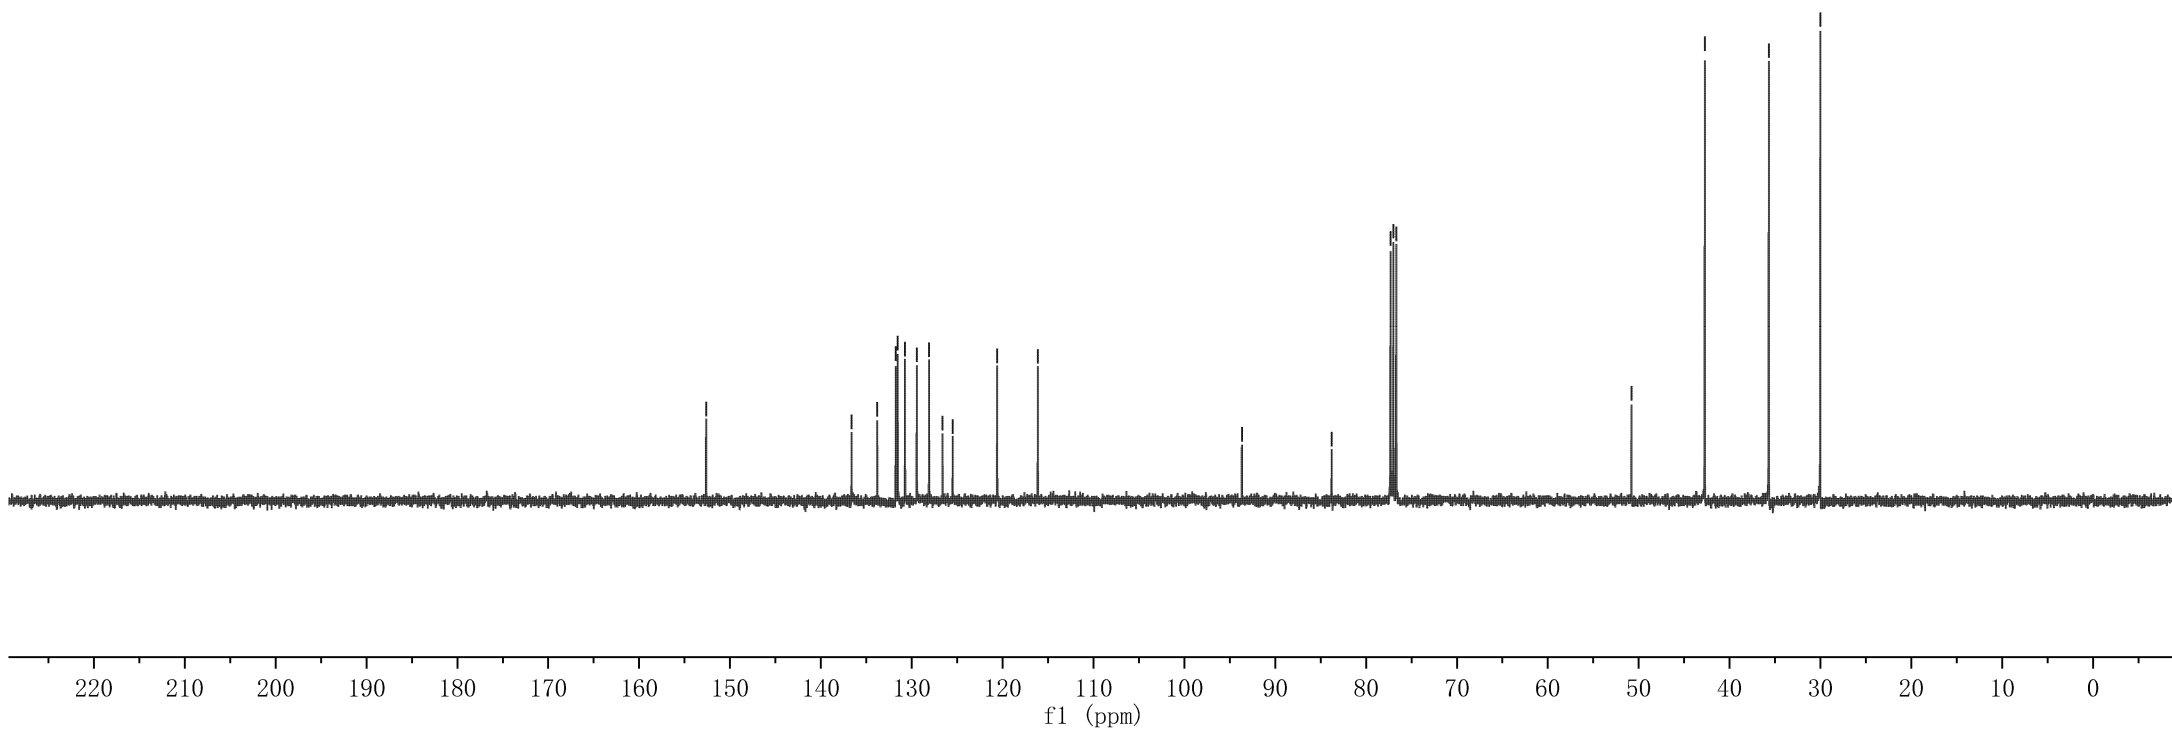



| Parameter                | Value               |
|--------------------------|---------------------|
| 1 Title                  | 1f                  |
| 2 Origin                 |                     |
| 3 Solvent                | CDC13               |
| 4 Temperature            | 296.1               |
| 5 Number of Scans        | 16                  |
| 6 Acquisition Time       | 4.0002              |
| 7 Acquisition Date       | 2022-02-24T13:51:20 |
| 8 Spectrometer Frequency | 399.93              |
| 9 Spectral Width         | 8012.0              |

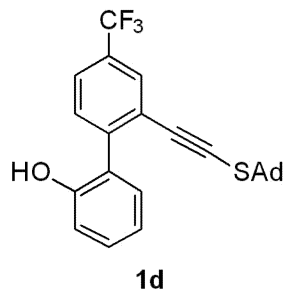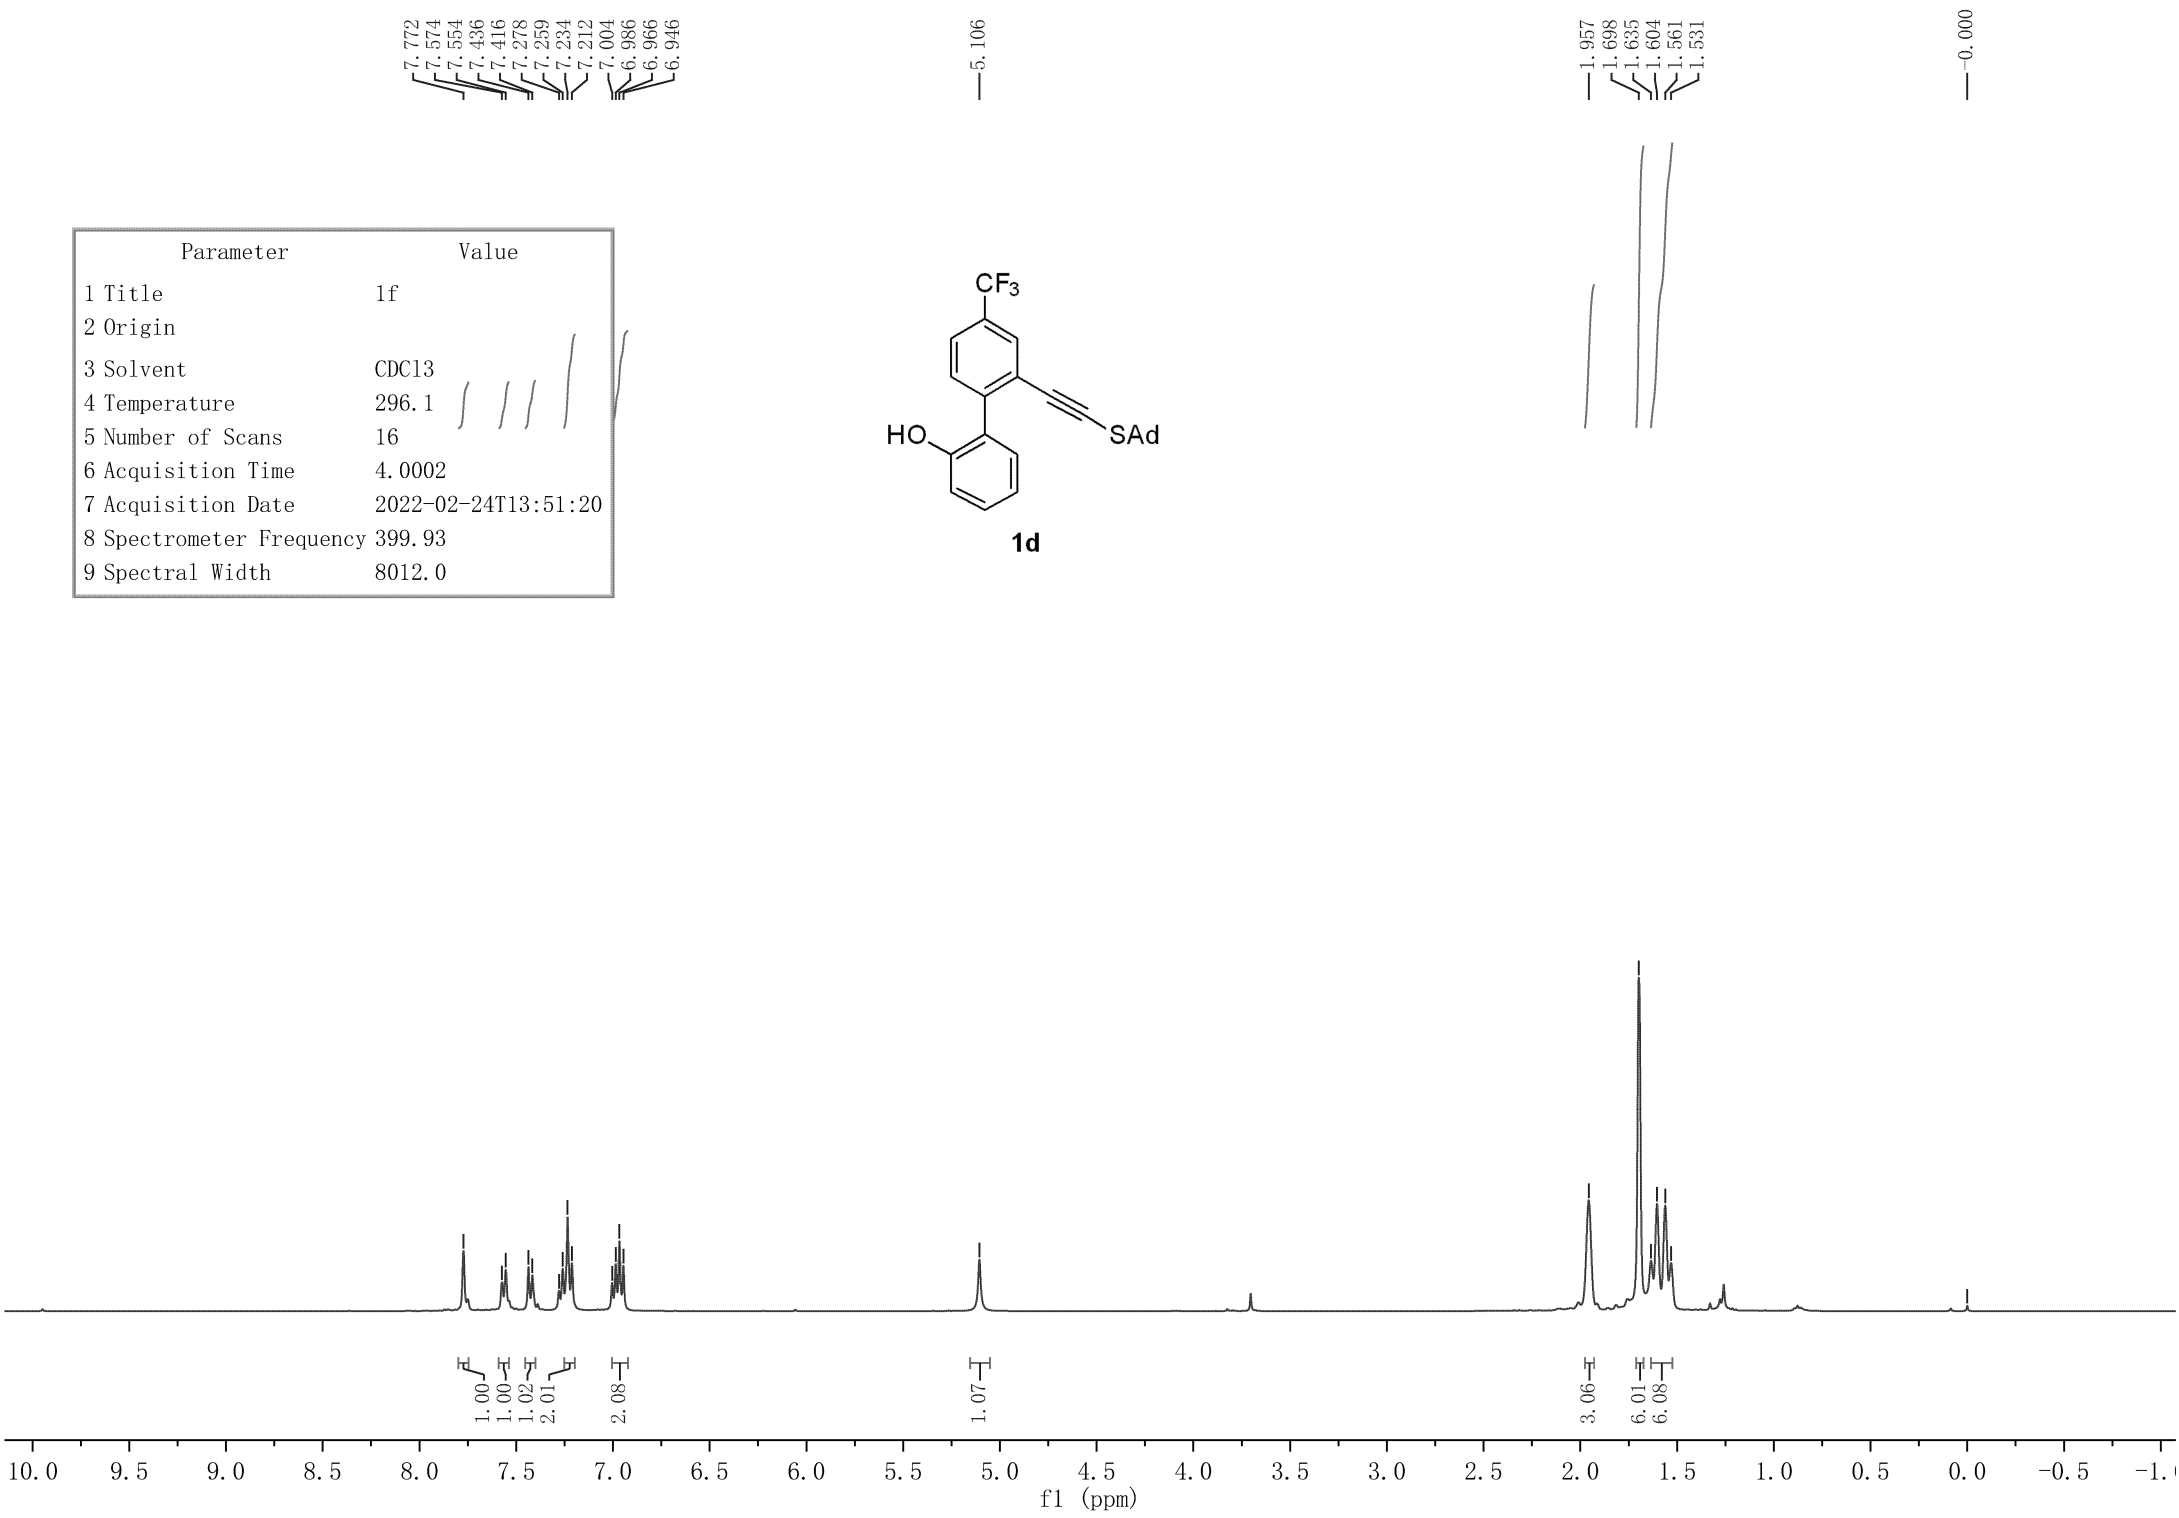

| Parameter                | Value               |
|--------------------------|---------------------|
| 1 Title                  | 1f                  |
| 2 Origin                 |                     |
| 3 Solvent                | CDC13               |
| 4 Temperature            | 296.1               |
| 5 Number of Scans        | 200                 |
| 6 Acquisition Time       | 1.0000              |
| 7 Acquisition Date       | 2022-02-24T14:00:03 |
| 8 Spectrometer Frequency | 100.56              |
| 9 Spectral Width         | 26041.0             |

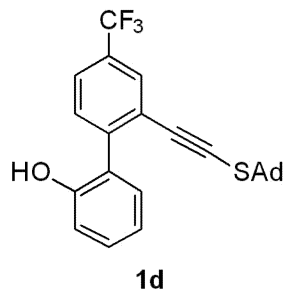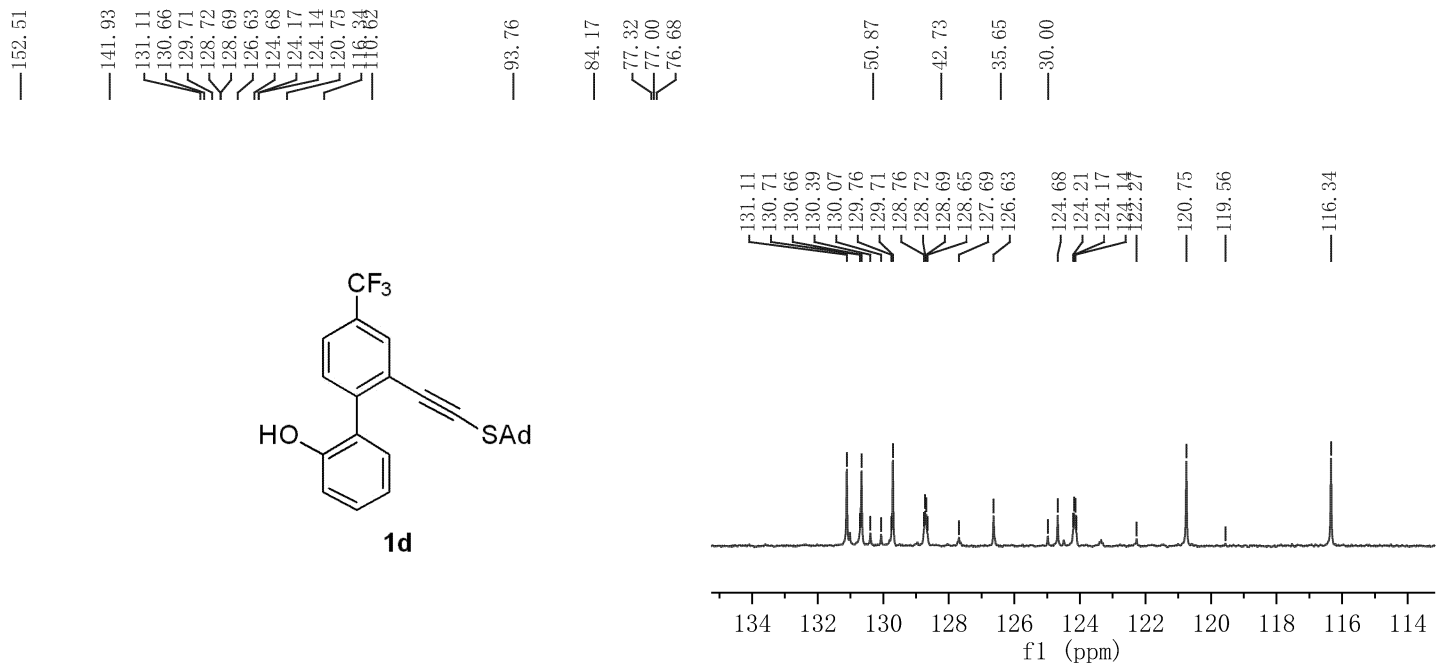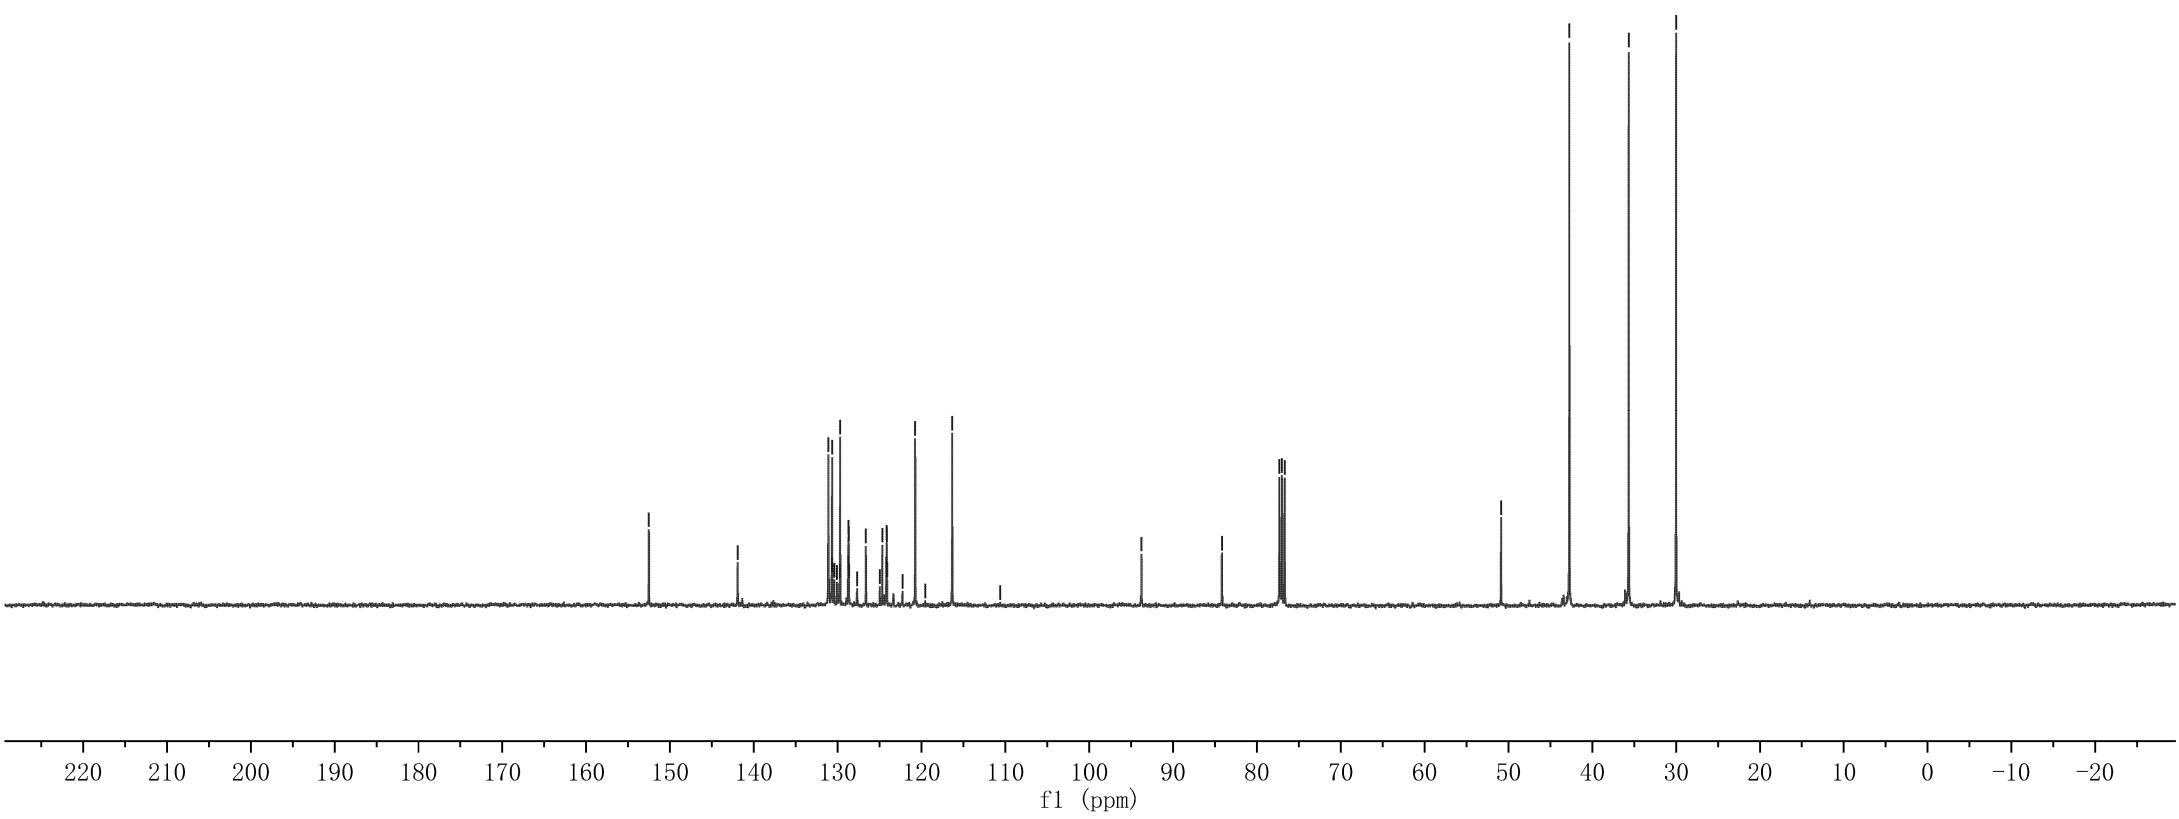

62.36

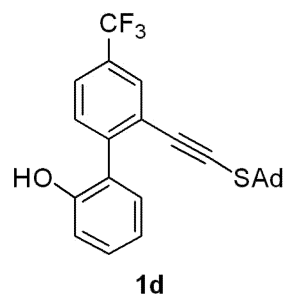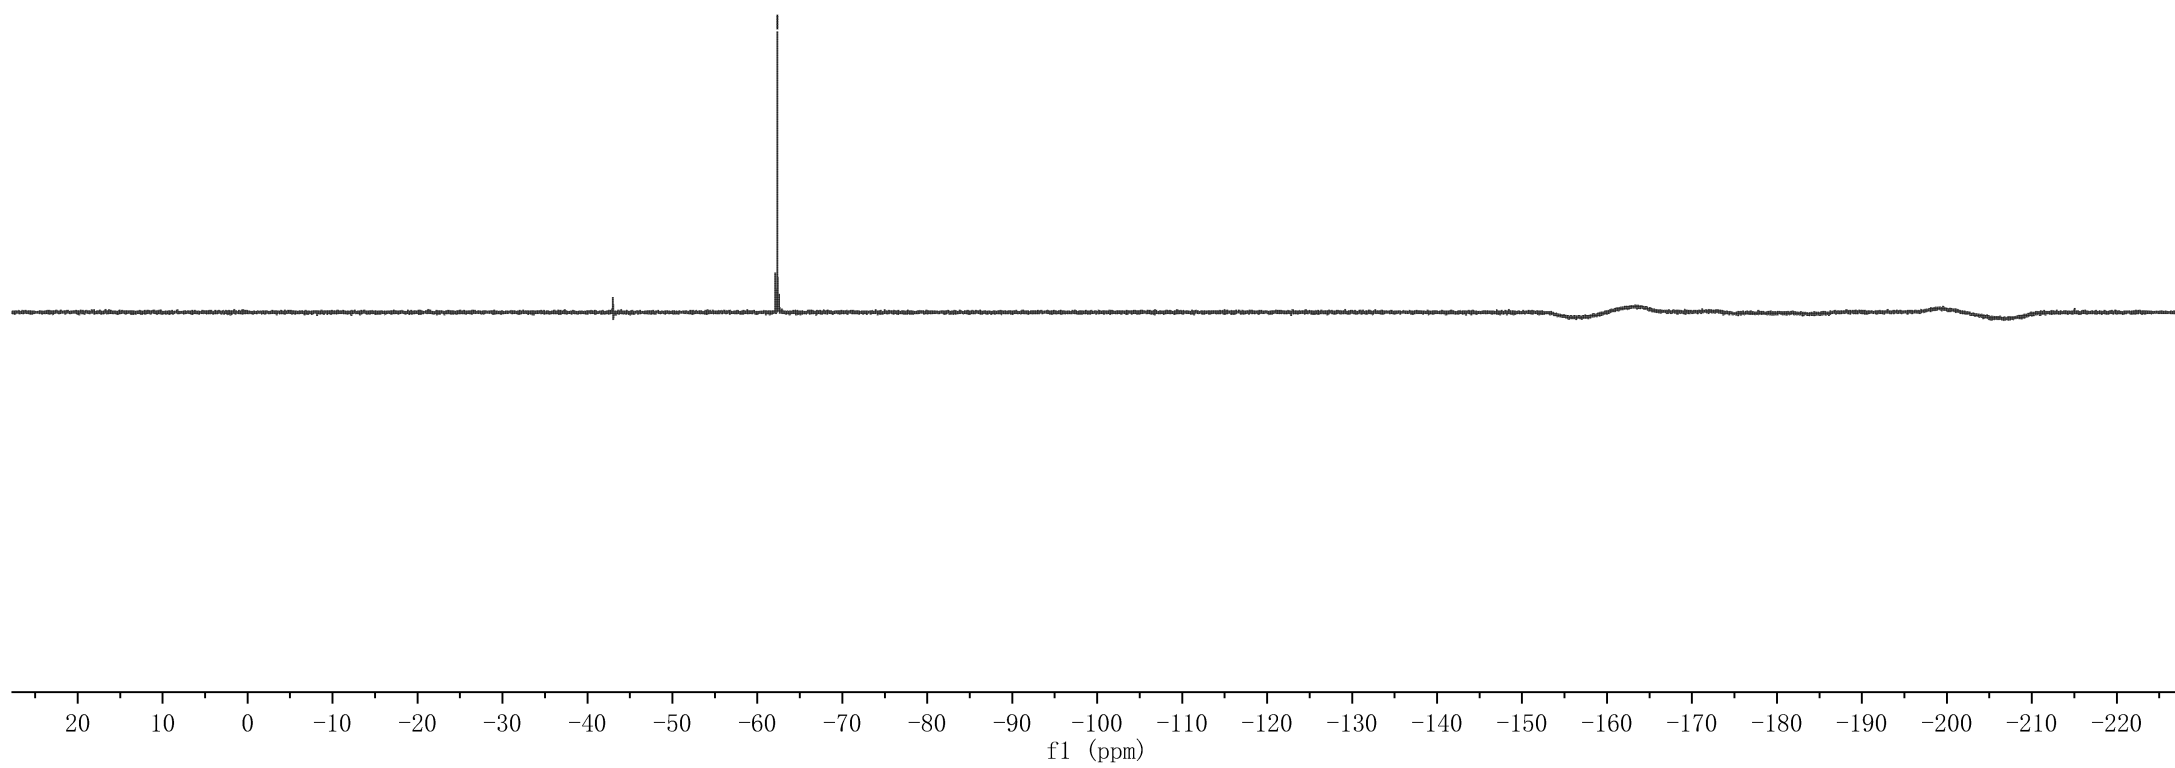

| Parameter                | Value               |
|--------------------------|---------------------|
| 1 Title                  | 1b                  |
| 2 Origin                 |                     |
| 3 Solvent                | CDC13               |
| 4 Temperature            | 297.5               |
| 5 Number of Scans        | 16                  |
| 6 Acquisition Time       | 4.0002              |
| 7 Acquisition Date       | 2022-02-16T15:45:09 |
| 8 Spectrometer Frequency | 399.93              |
| 9 Spectral Width         | 8012.0              |

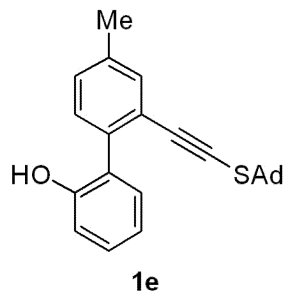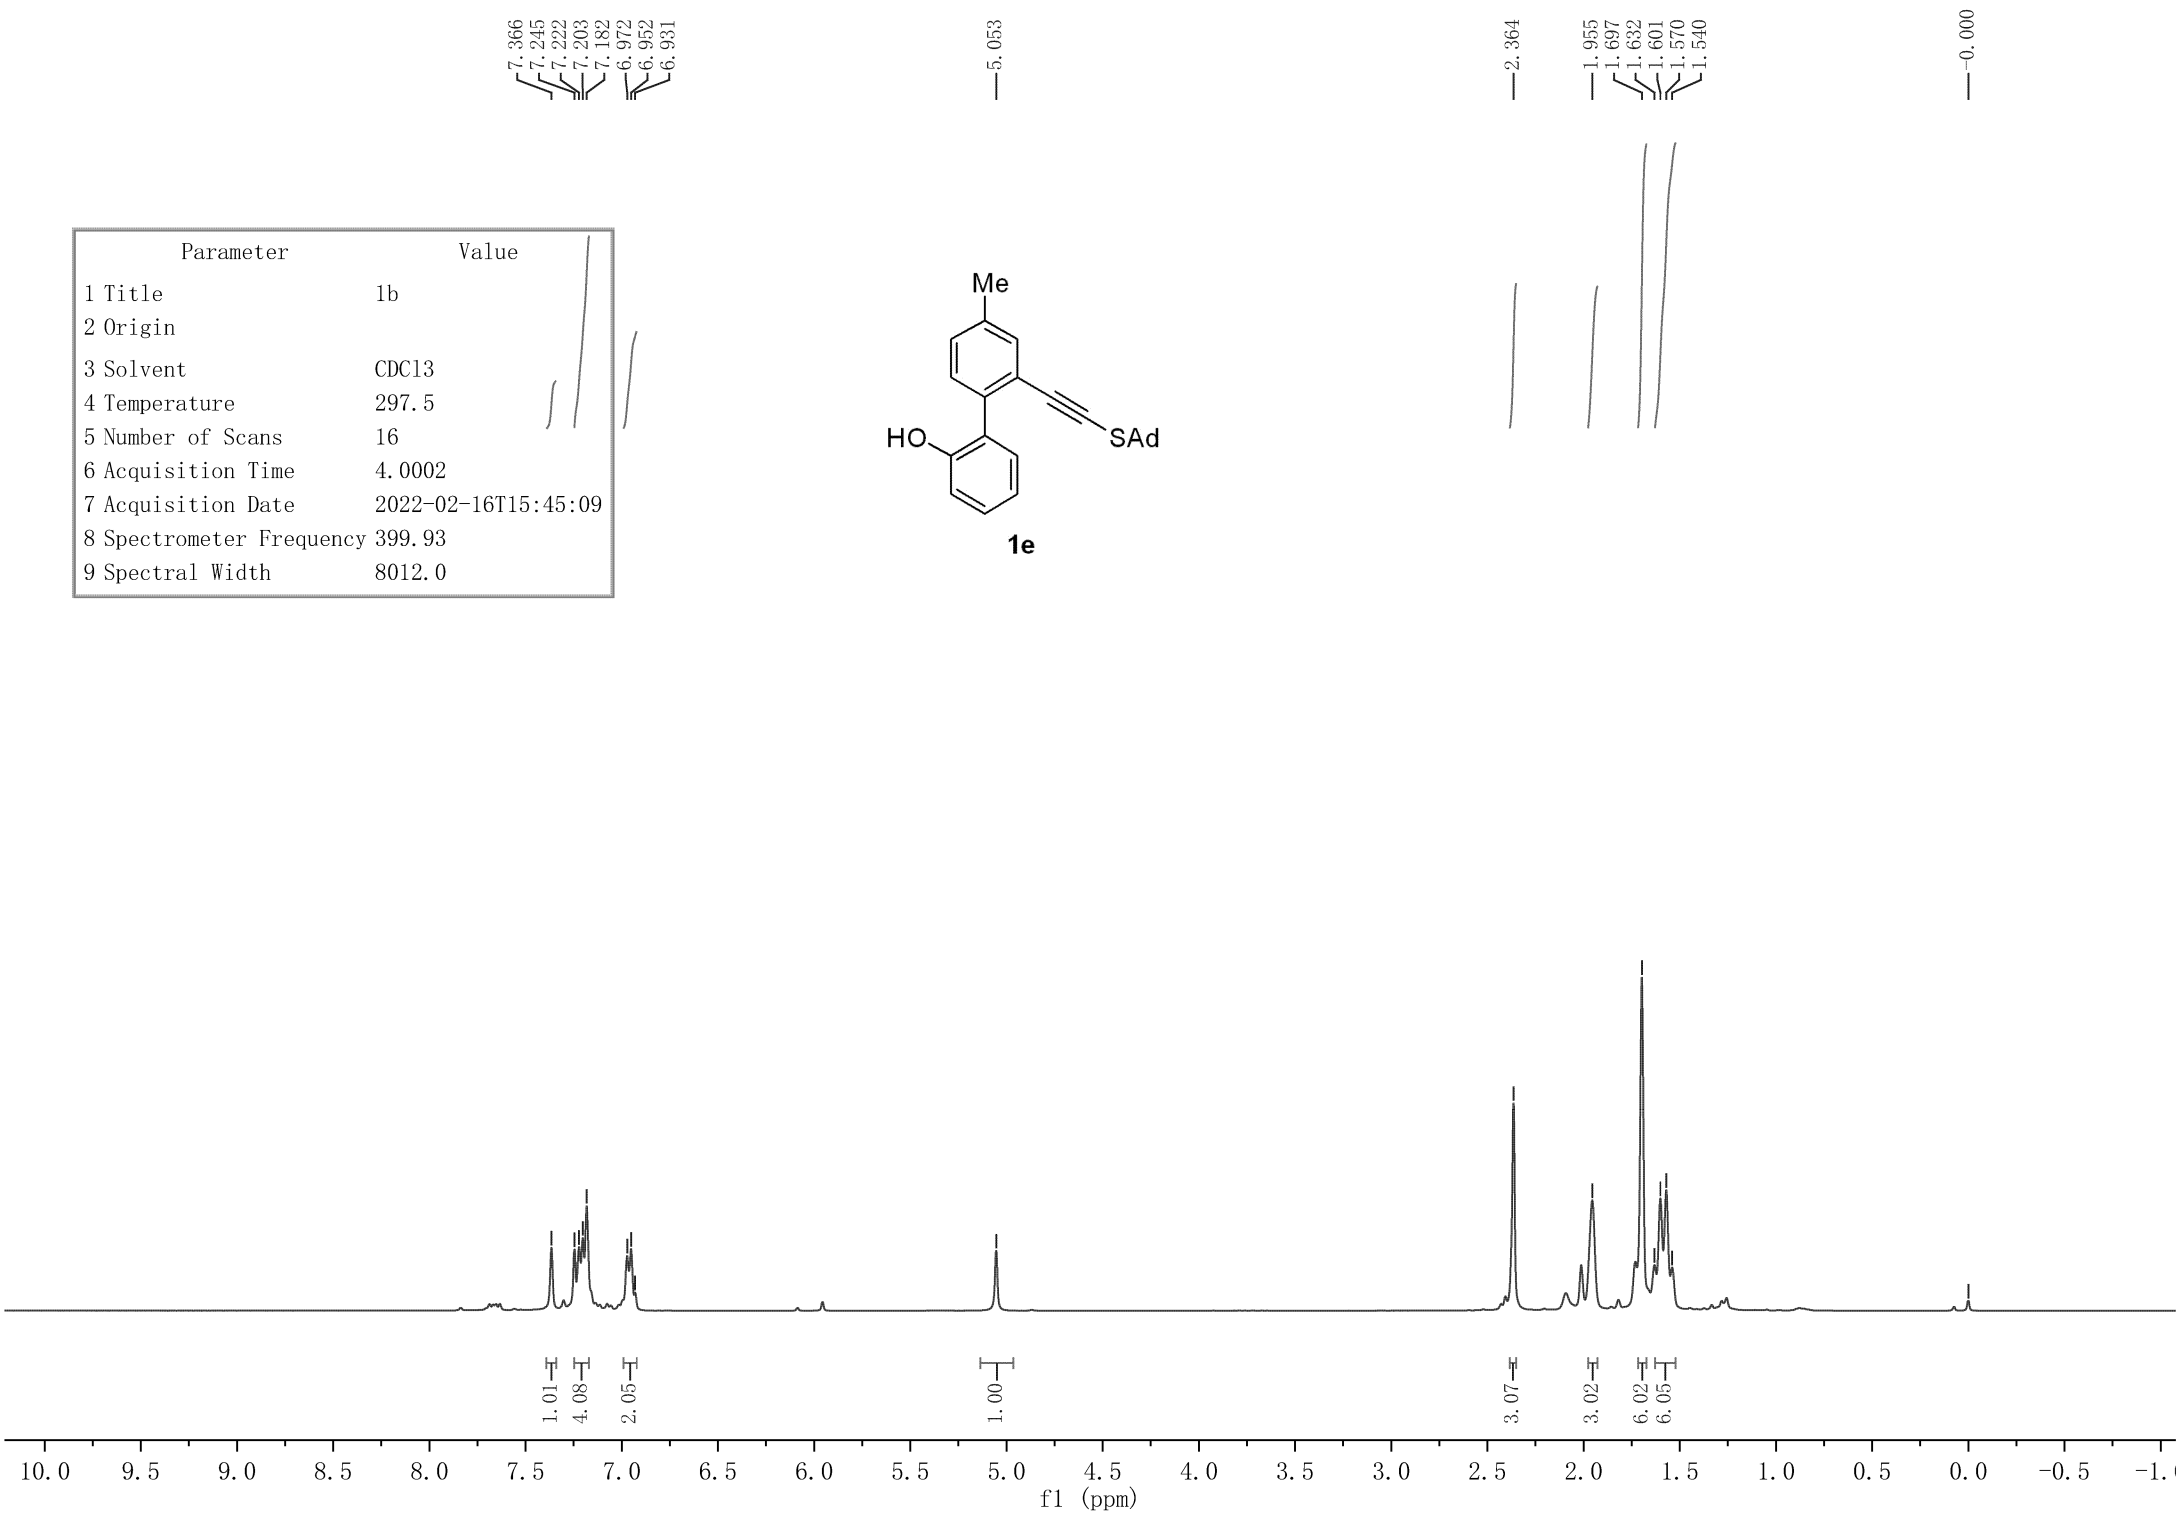

| Parameter                | Value               |
|--------------------------|---------------------|
| 1 Title                  | 1b                  |
| 2 Origin                 |                     |
| 3 Solvent                | CDC13               |
| 4 Temperature            | 297.6               |
| 5 Number of Scans        | 200                 |
| 6 Acquisition Time       | 1.0000              |
| 7 Acquisition Date       | 2022-02-16T15:53:58 |
| 8 Spectrometer Frequency | 100.56              |
| 9 Spectral Width         | 26041.0             |

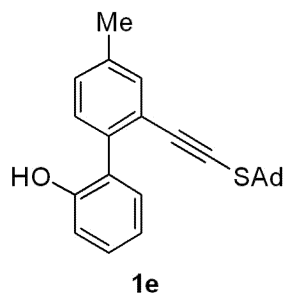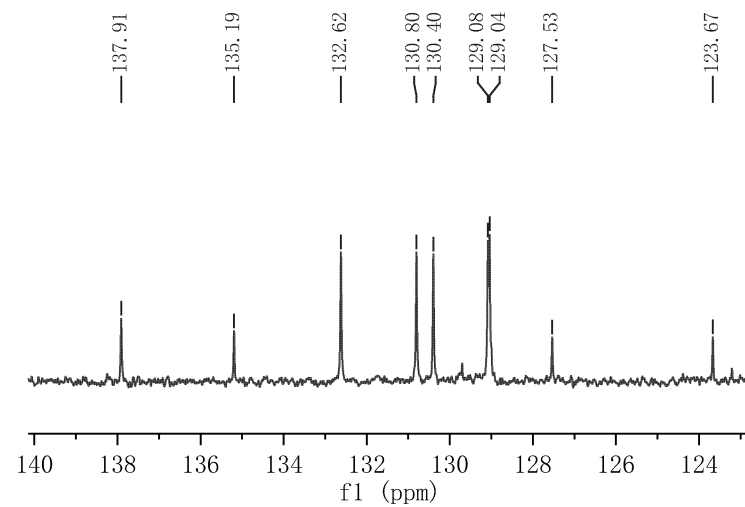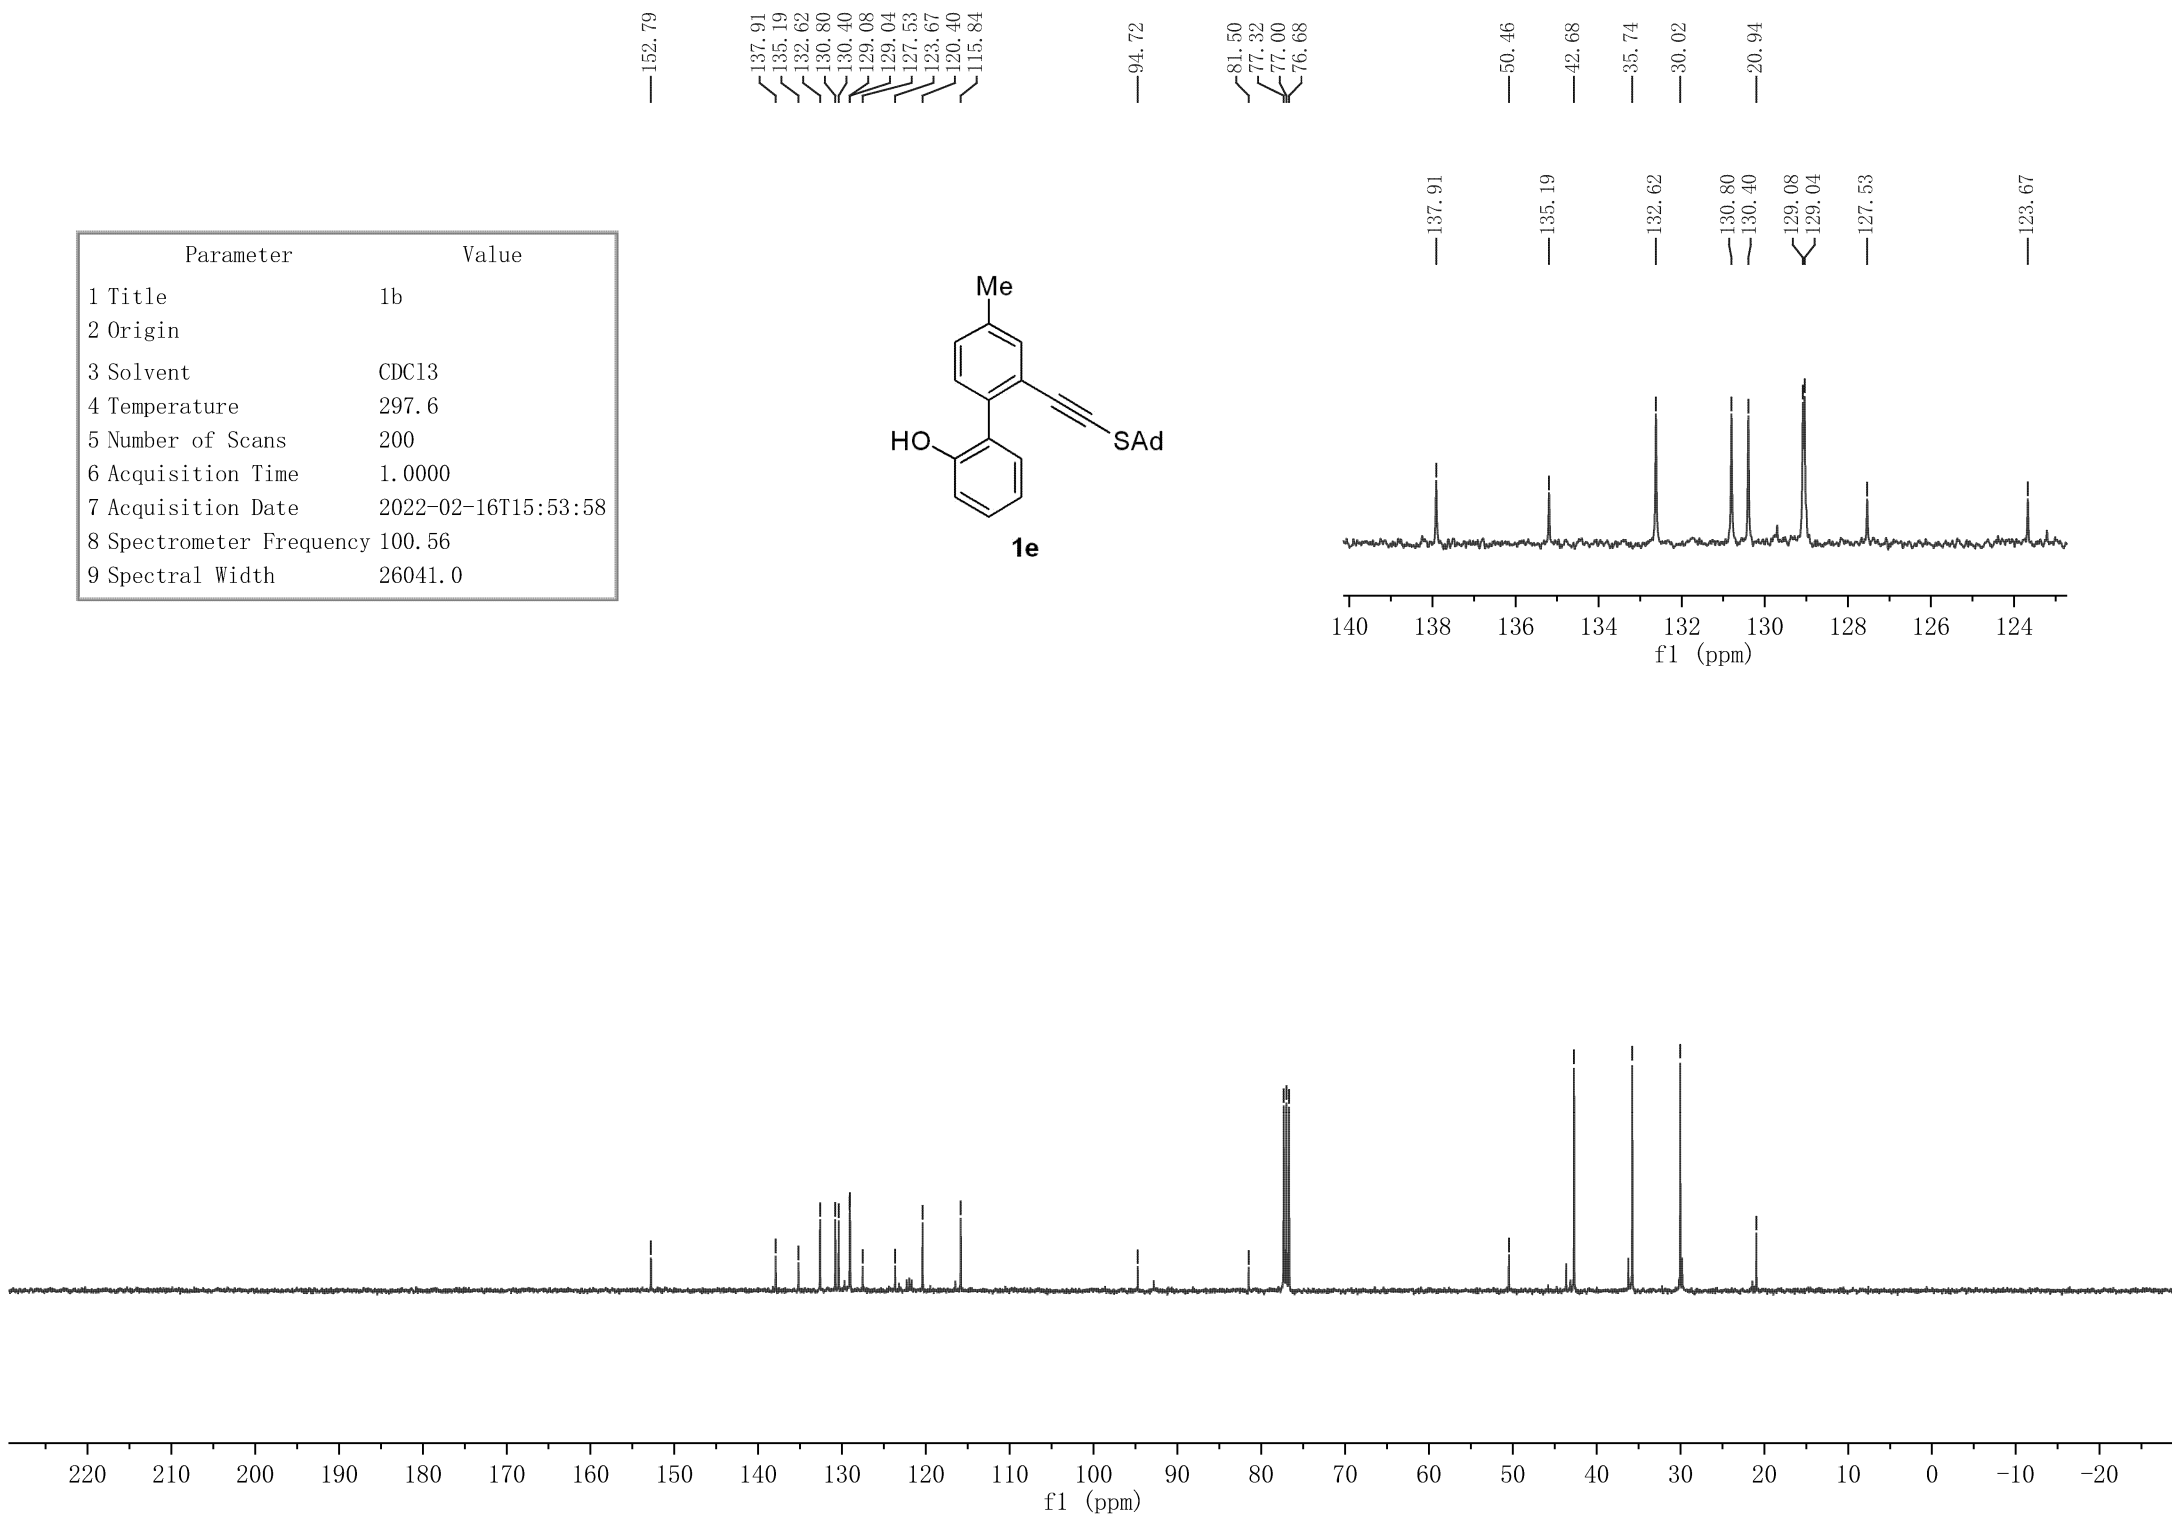

| Parameter                | Value               |
|--------------------------|---------------------|
| 1 Title                  | fxv-7-93            |
| 2 Origin                 | Bruker BioSpin GmbH |
| 3 Solvent                | CDC13               |
| 4 Temperature            | 298.0               |
| 5 Number of Scans        | 11                  |
| 6 Acquisition Time       | 4.0894              |
| 7 Acquisition Date       | 2022-02-11T16:25:28 |
| 8 Spectrometer Frequency | 400.13              |
| 9 Spectral Width         | 8012.8              |

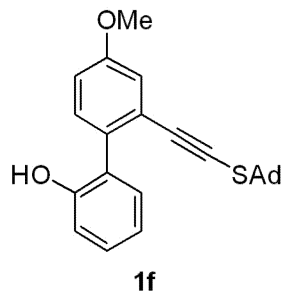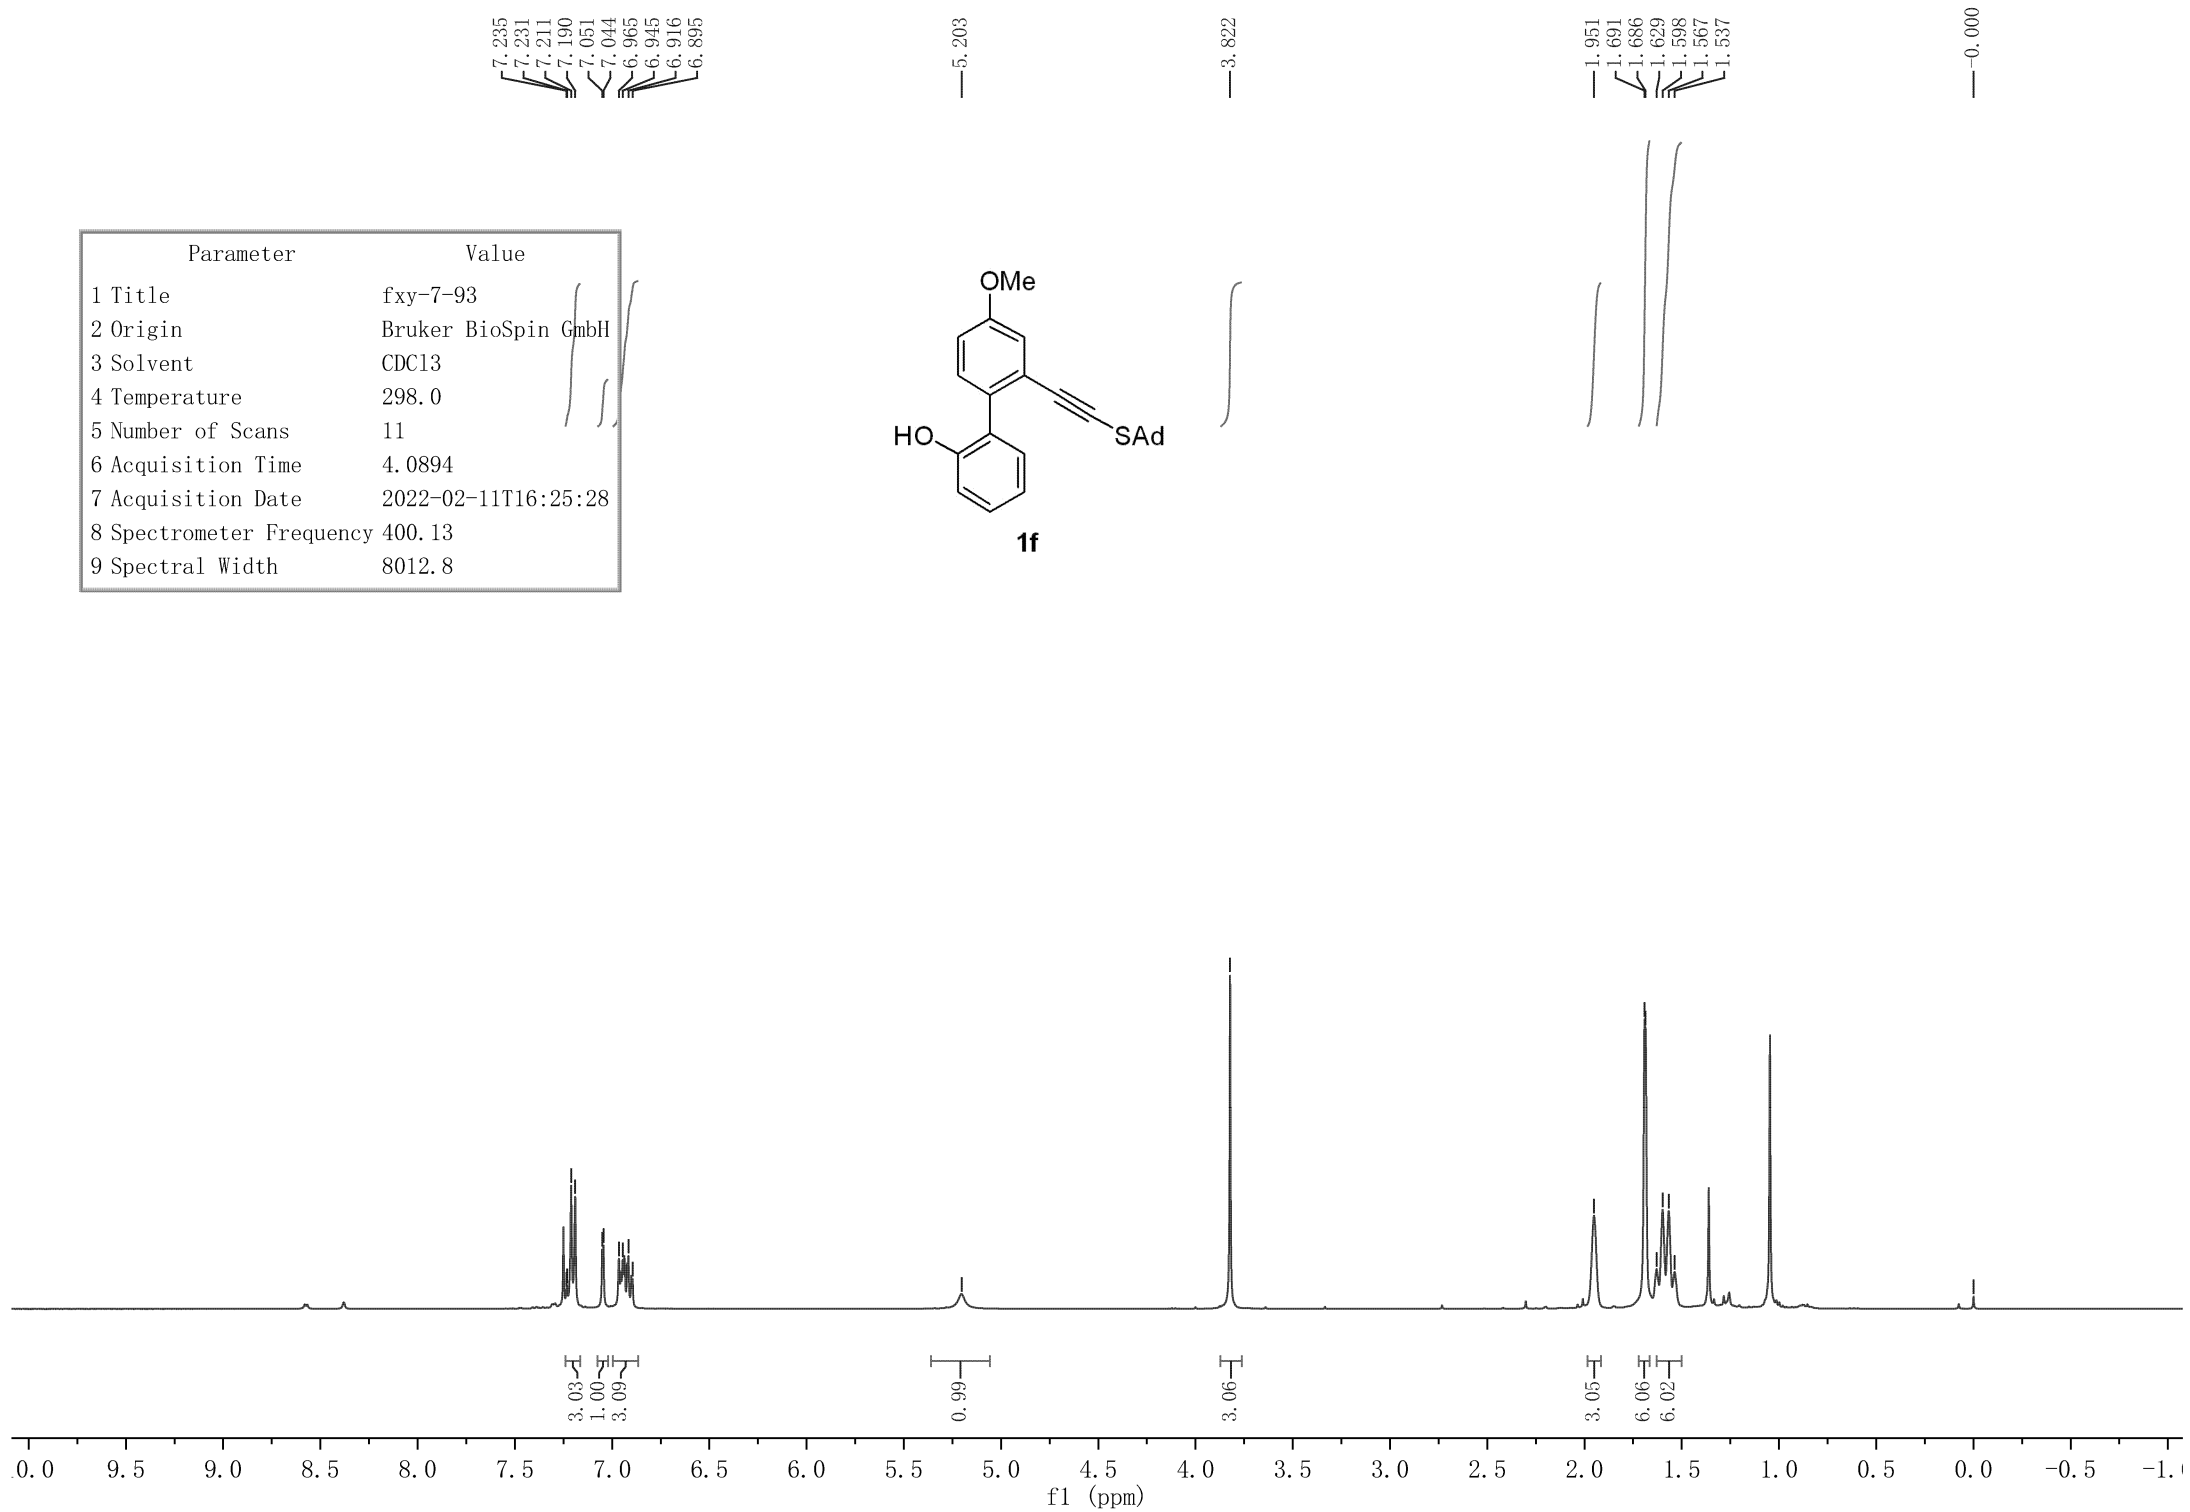

| Parameter                | Value               |
|--------------------------|---------------------|
| 1 Title                  | fxv-7-93-C          |
| 2 Origin                 | Bruker BioSpin GmbH |
| 3 Solvent                | CDC13               |
| 4 Temperature            | 300.0               |
| 5 Number of Scans        | 23                  |
| 6 Acquisition Time       | 1.3631              |
| 7 Acquisition Date       | 2022-02-11T16:26:59 |
| 8 Spectrometer Frequency | 100.61              |
| 9 Spectral Width         | 24038.5             |

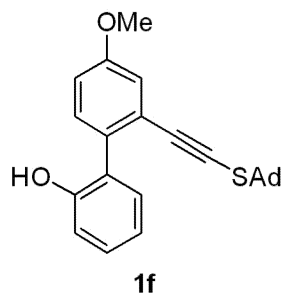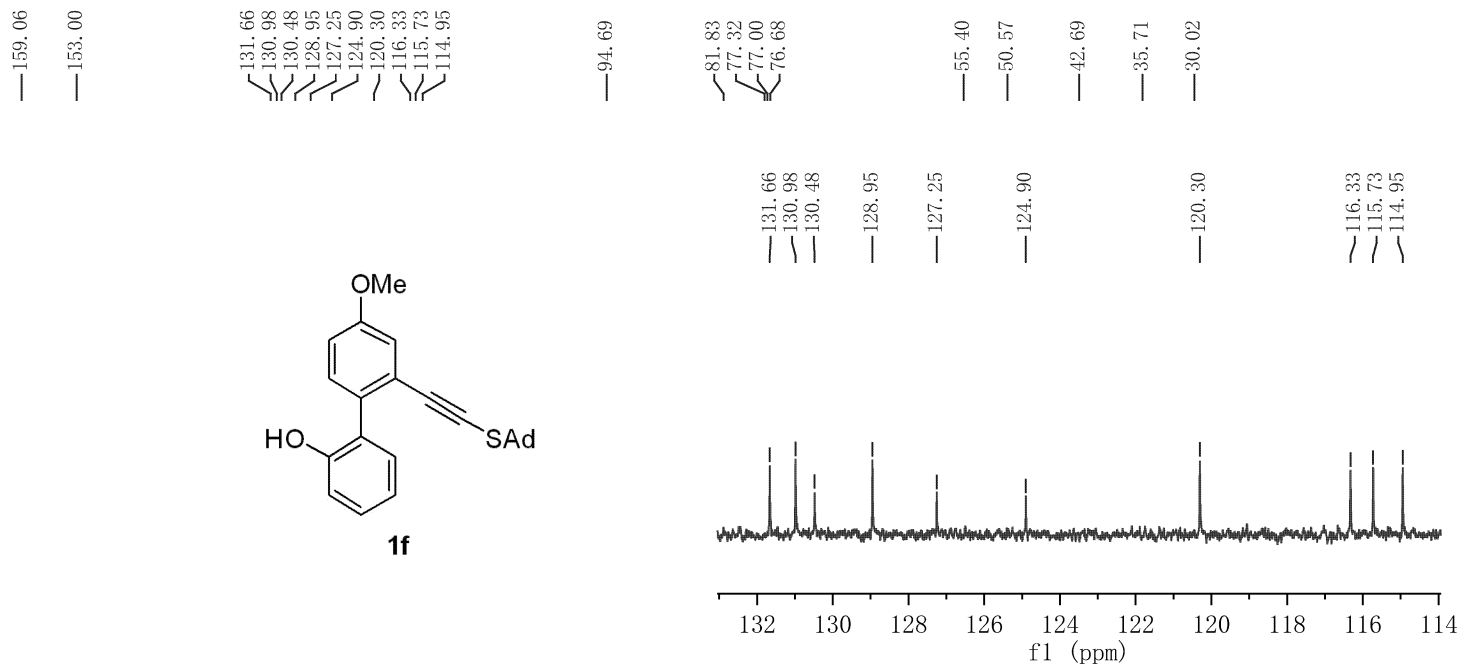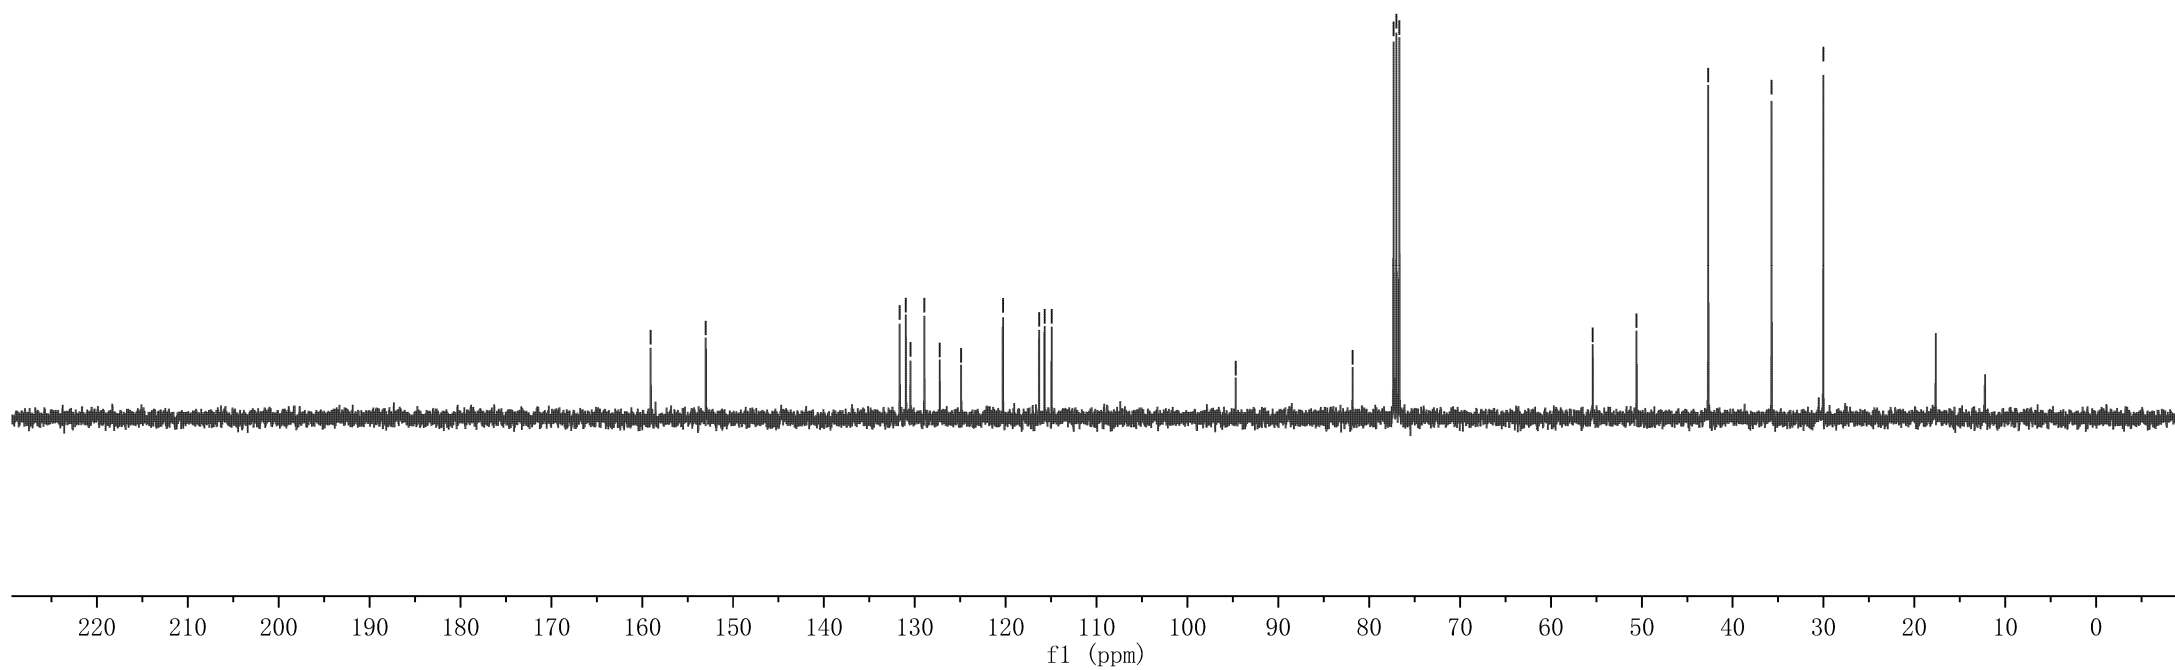

| Parameter                | Value               |
|--------------------------|---------------------|
| 1 Title                  | 1g                  |
| 2 Origin                 |                     |
| 3 Solvent                | CDC13               |
| 4 Temperature            | 297.4               |
| 5 Number of Scans        | 20                  |
| 6 Acquisition Time       | 4.0002              |
| 7 Acquisition Date       | 2022-01-18T16:32:08 |
| 8 Spectrometer Frequency | 399.93              |
| 9 Spectral Width         | 8012.0              |

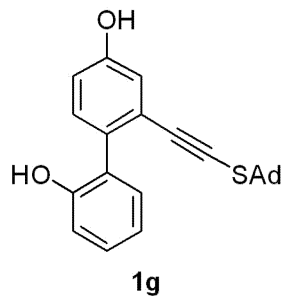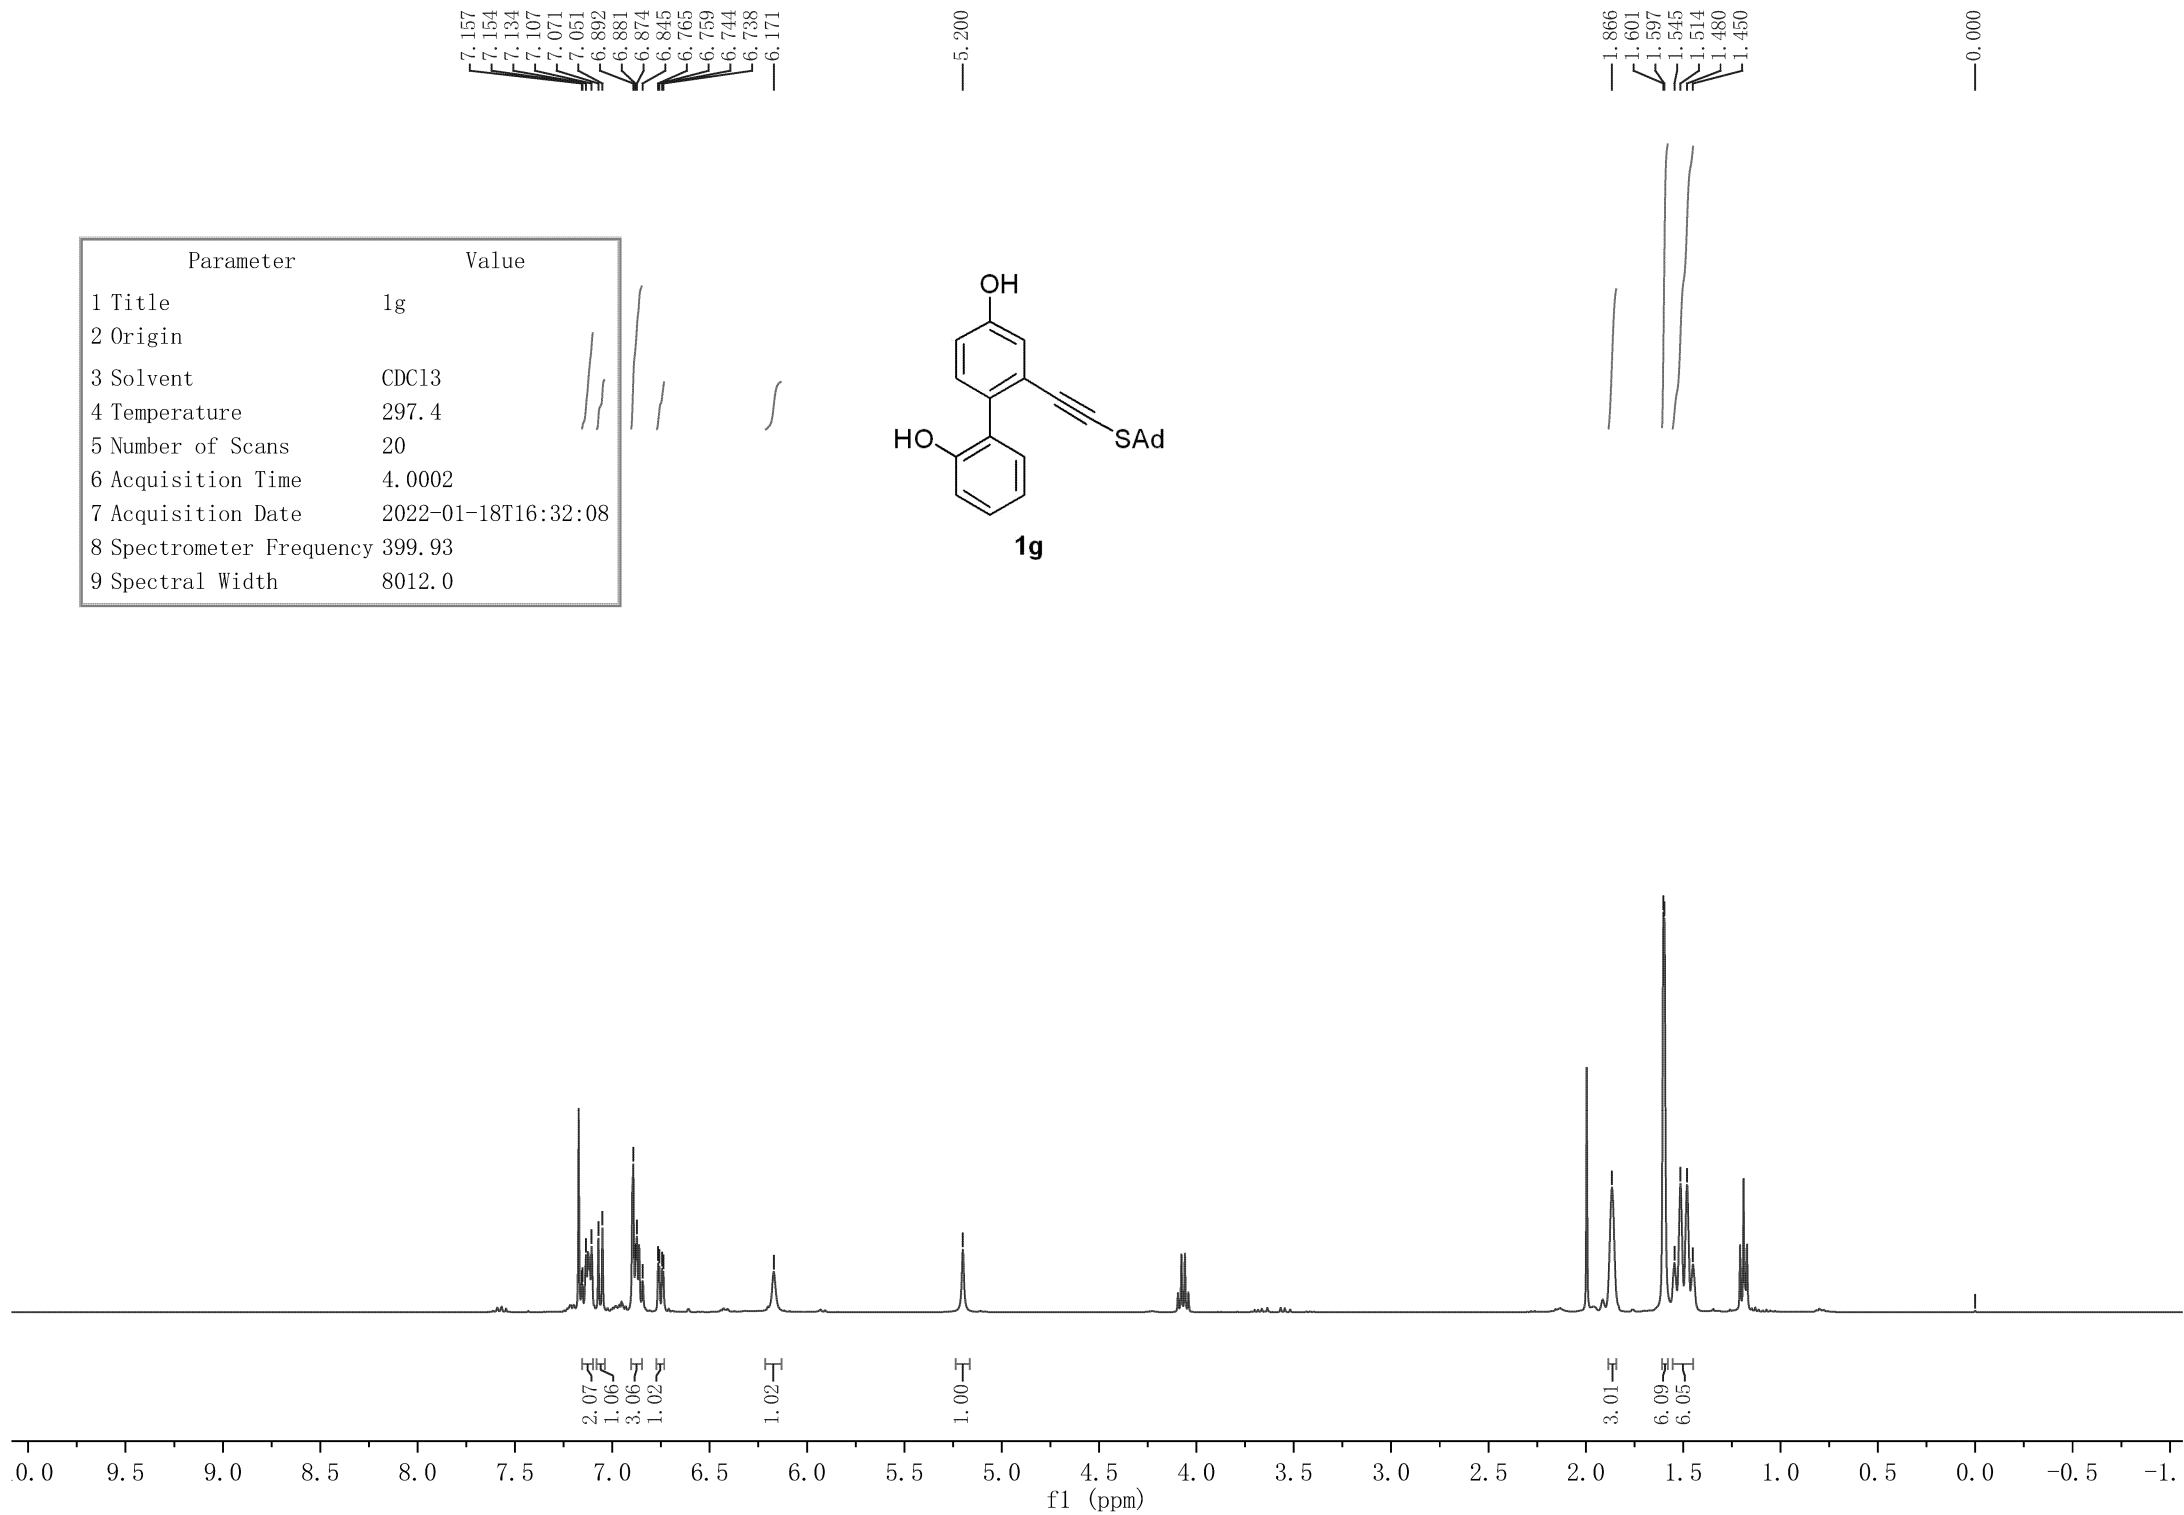



| Parameter                | Value               |
|--------------------------|---------------------|
| 1 Title                  | 1g                  |
| 2 Origin                 |                     |
| 3 Solvent                | CDC13               |
| 4 Temperature            | 297.5               |
| 5 Number of Scans        | 300                 |
| 6 Acquisition Time       | 1.0000              |
| 7 Acquisition Date       | 2022-01-19T01:41:12 |
| 8 Spectrometer Frequency | 100.56              |
| 9 Spectral Width         | 26041.0             |



155.52  
152.80

131.80  
131.04  
130.20  
128.91  
127.35  
124.89  
120.41  
118.36  
115.85  
115.72

94.59

81.74  
77.32  
77.00  
76.68

50.60

42.65

35.67

29.99

131.80  
131.04  
130.20

128.91

127.35

124.89

120.41

118.36

115.85  
115.72

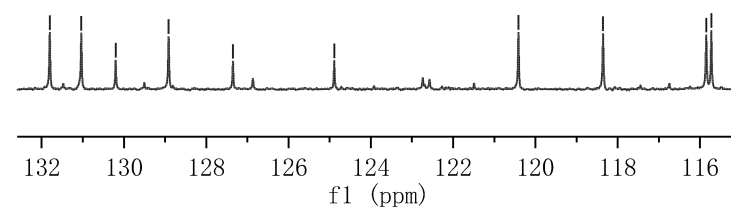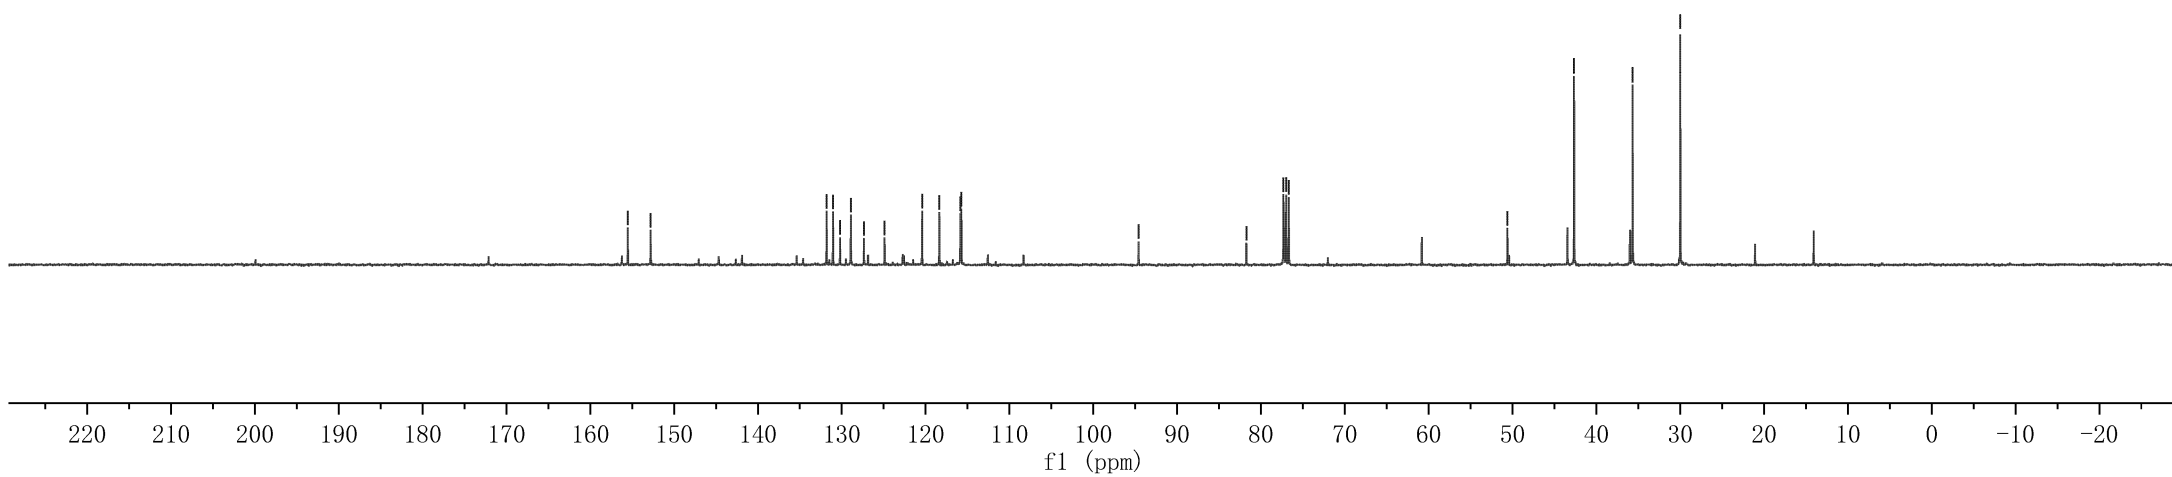

| Parameter                | Value               |
|--------------------------|---------------------|
| 1 Title                  | 1h                  |
| 2 Origin                 |                     |
| 3 Solvent                | CDC13               |
| 4 Temperature            | 297.0               |
| 5 Number of Scans        | 16                  |
| 6 Acquisition Time       | 4.0002              |
| 7 Acquisition Date       | 2022-01-15T22:42:44 |
| 8 Spectrometer Frequency | 399.93              |
| 9 Spectral Width         | 8012.0              |

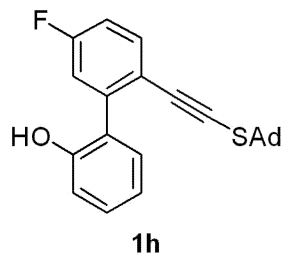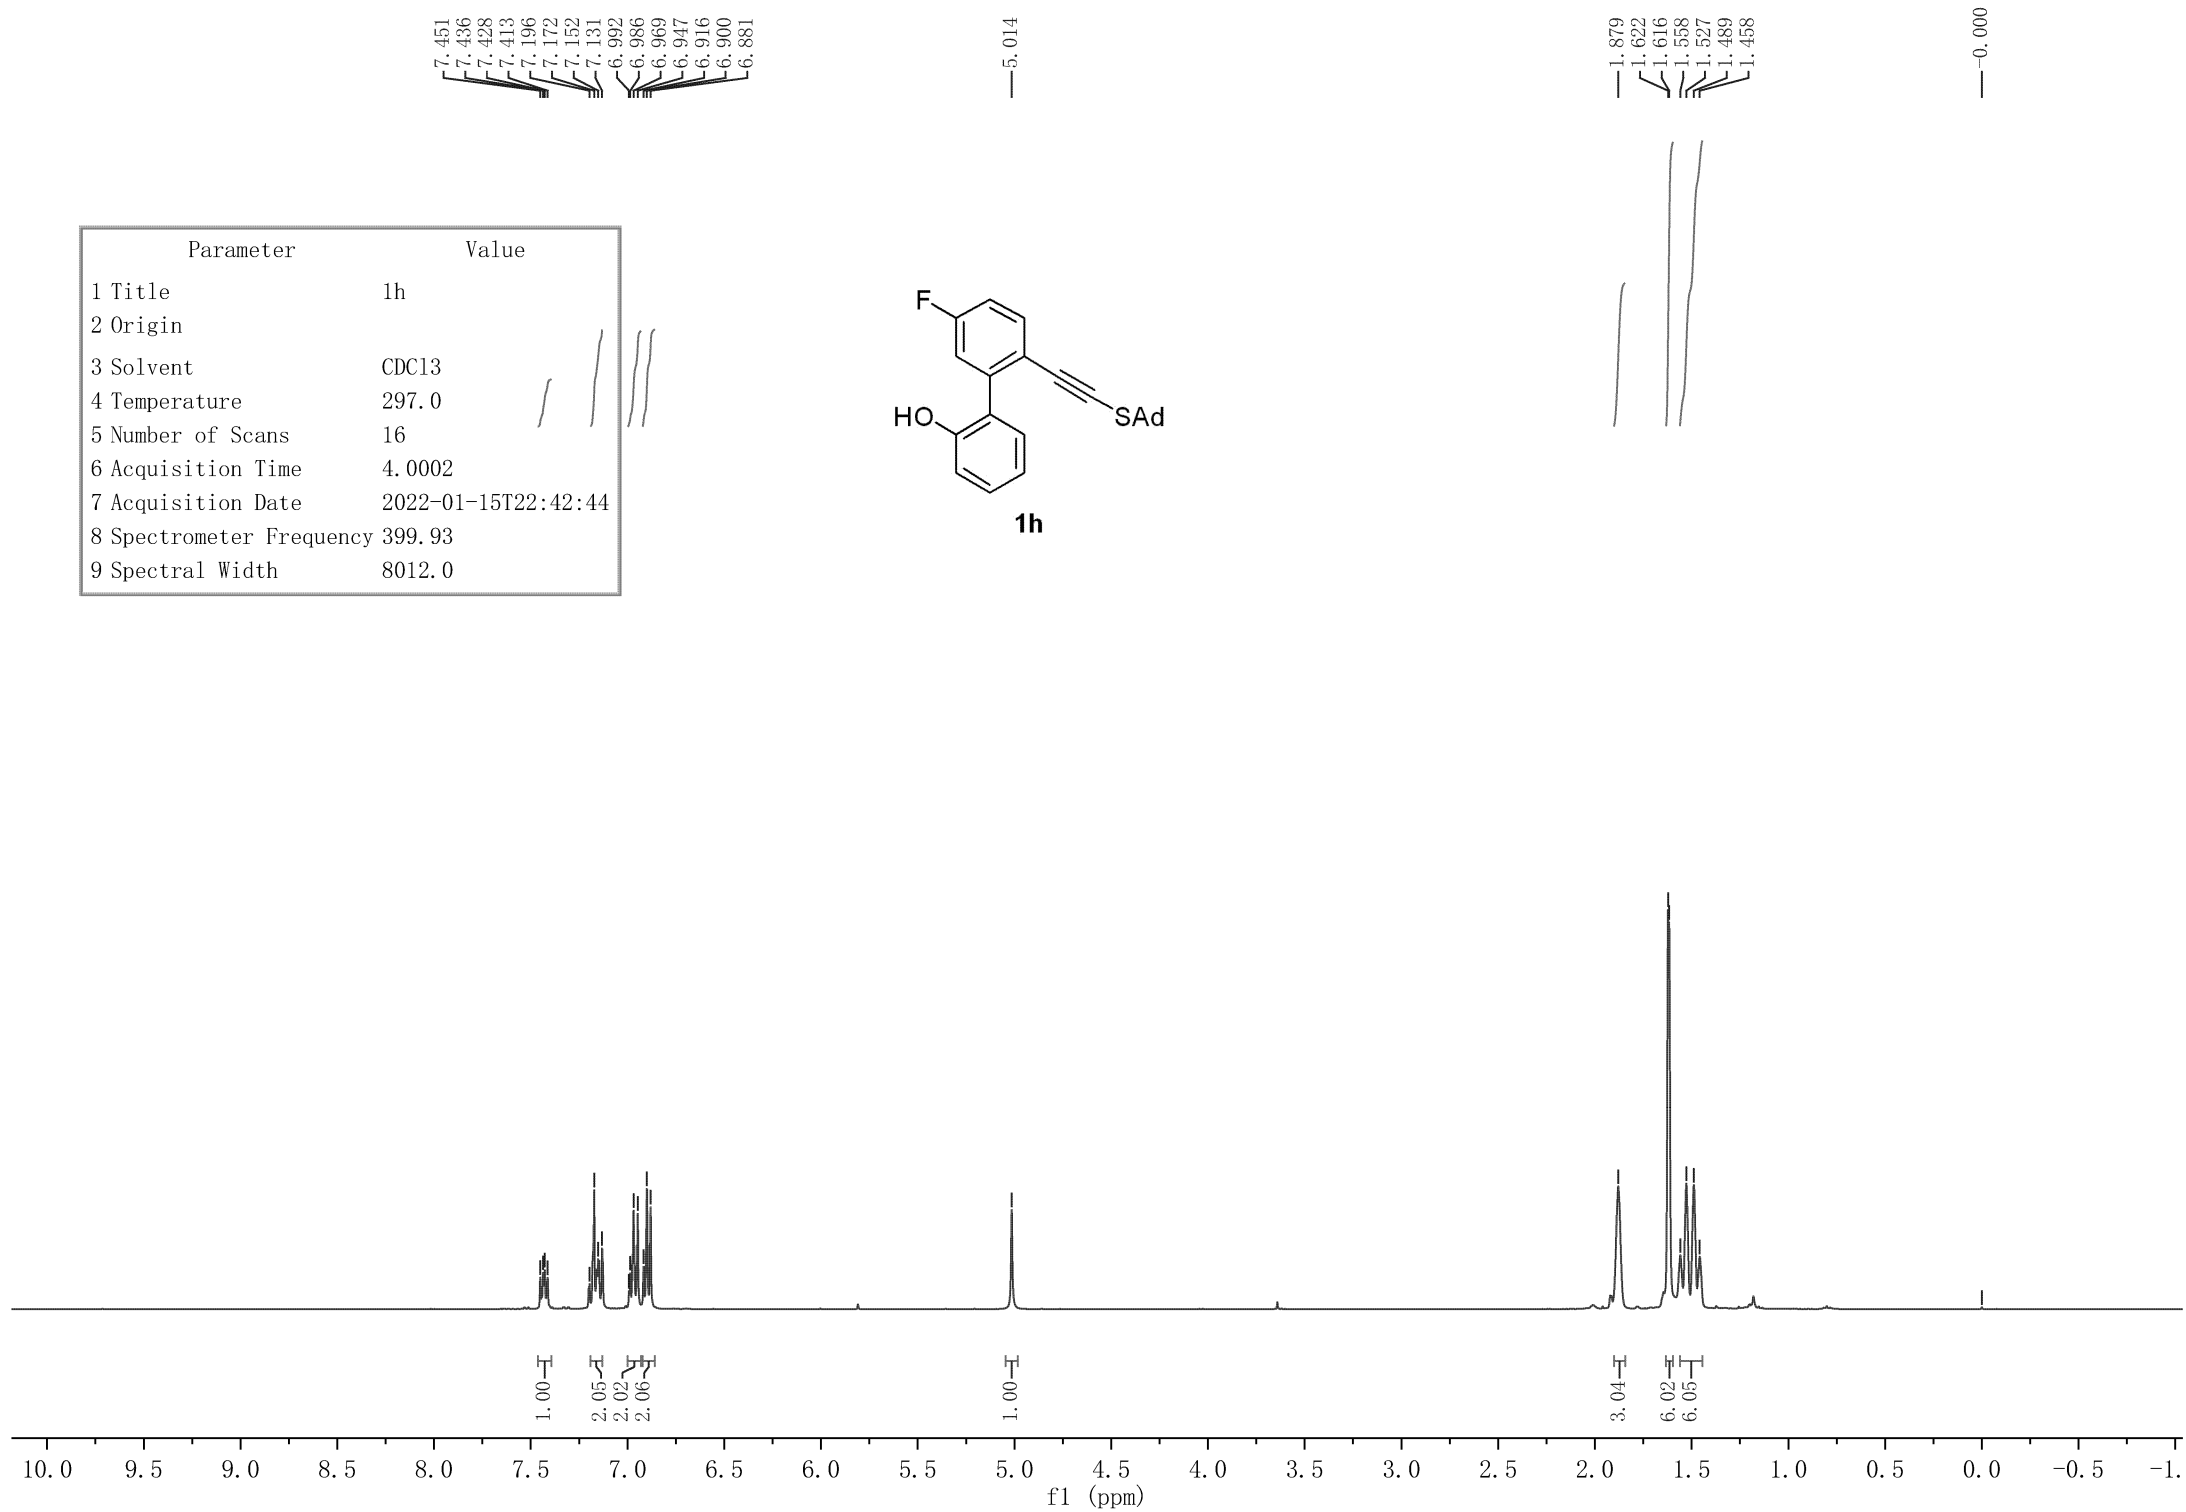

| Parameter                | Value               |
|--------------------------|---------------------|
| 1 Title                  | 1h                  |
| 2 Origin                 |                     |
| 3 Solvent                | CDC13               |
| 4 Temperature            | 297.0               |
| 5 Number of Scans        | 300                 |
| 6 Acquisition Time       | 1.0000              |
| 7 Acquisition Date       | 2022-01-15T22:55:13 |
| 8 Spectrometer Frequency | 100.56              |
| 9 Spectral Width         | 26041.0             |

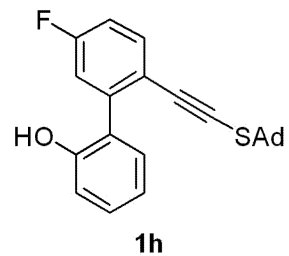

163.12  
160.63  
152.53  
140.95  
140.87  
134.01  
133.92  
130.60  
129.59  
126.78  
126.77  
119.95  
119.91  
117.77  
117.55  
116.34  
115.41  
115.19  
93.54

81.49  
77.32  
77.00  
76.68

50.56  
42.71  
35.72  
30.01

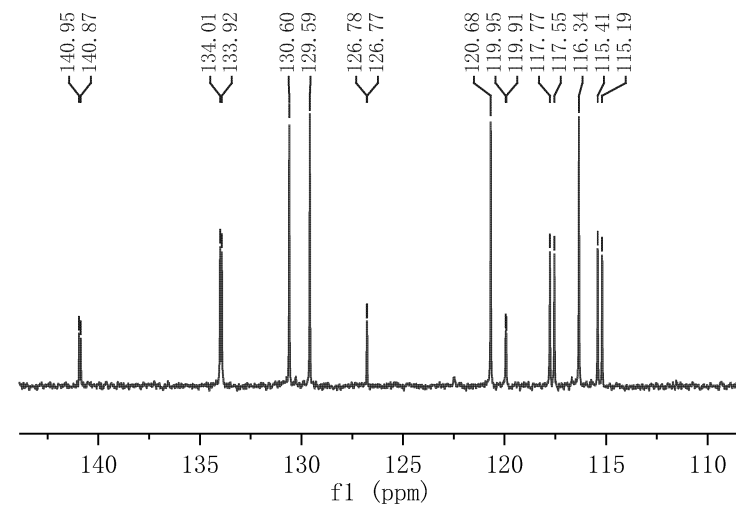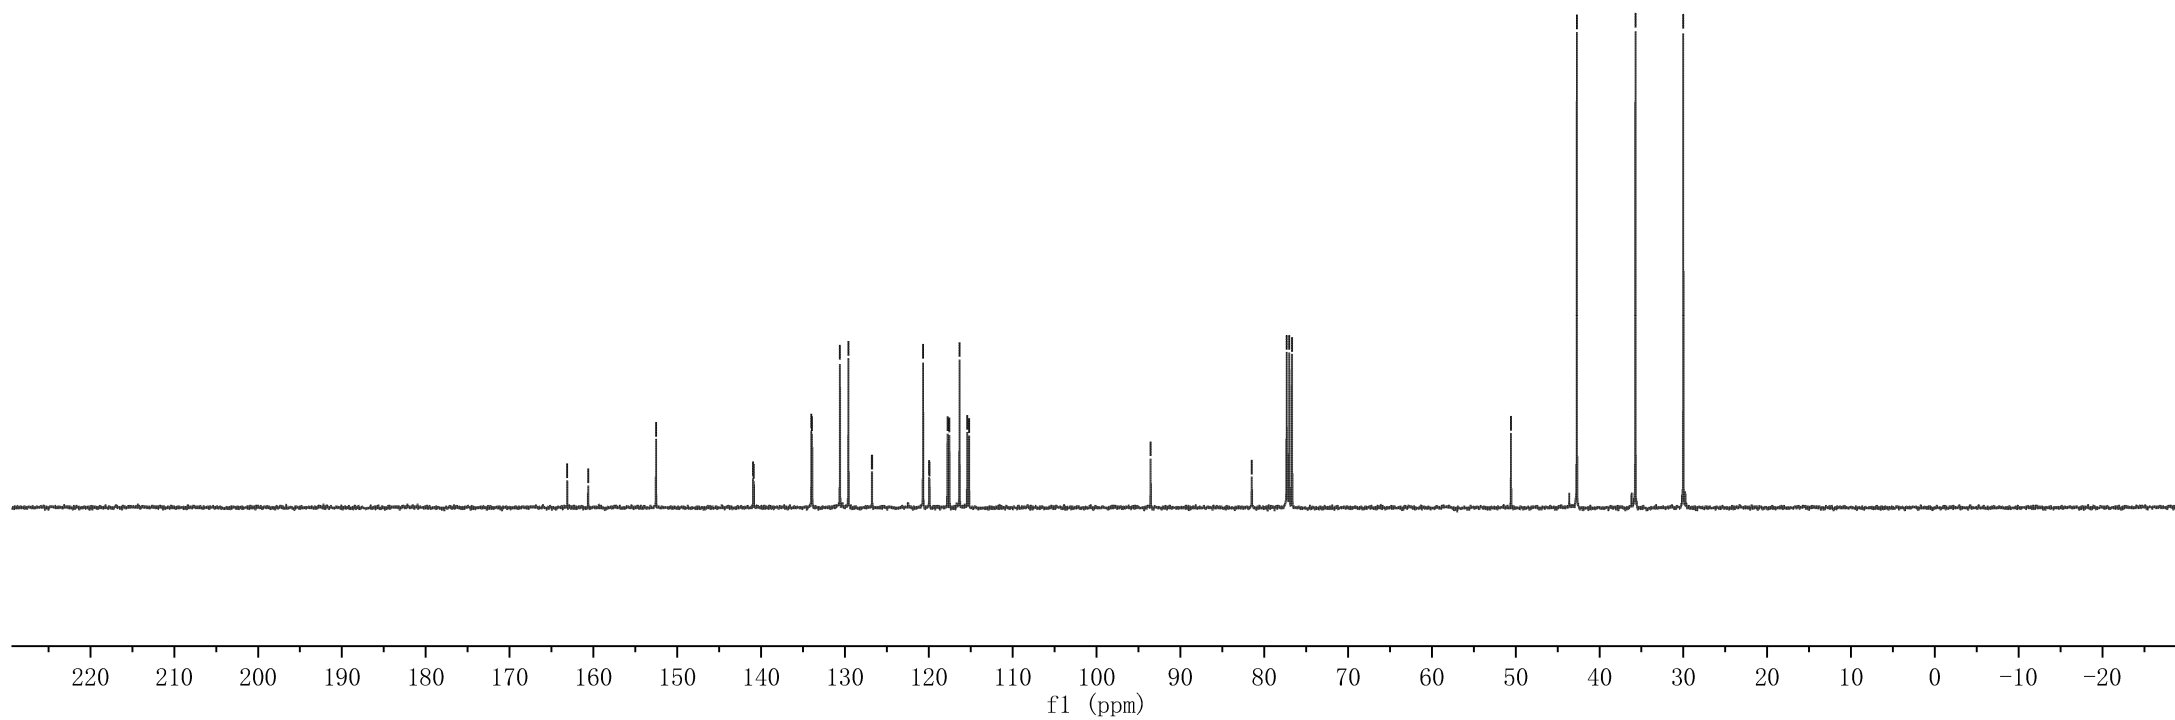

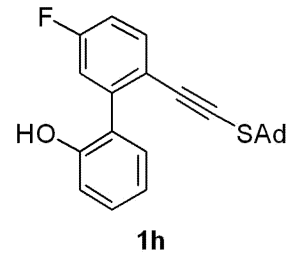

-116.09

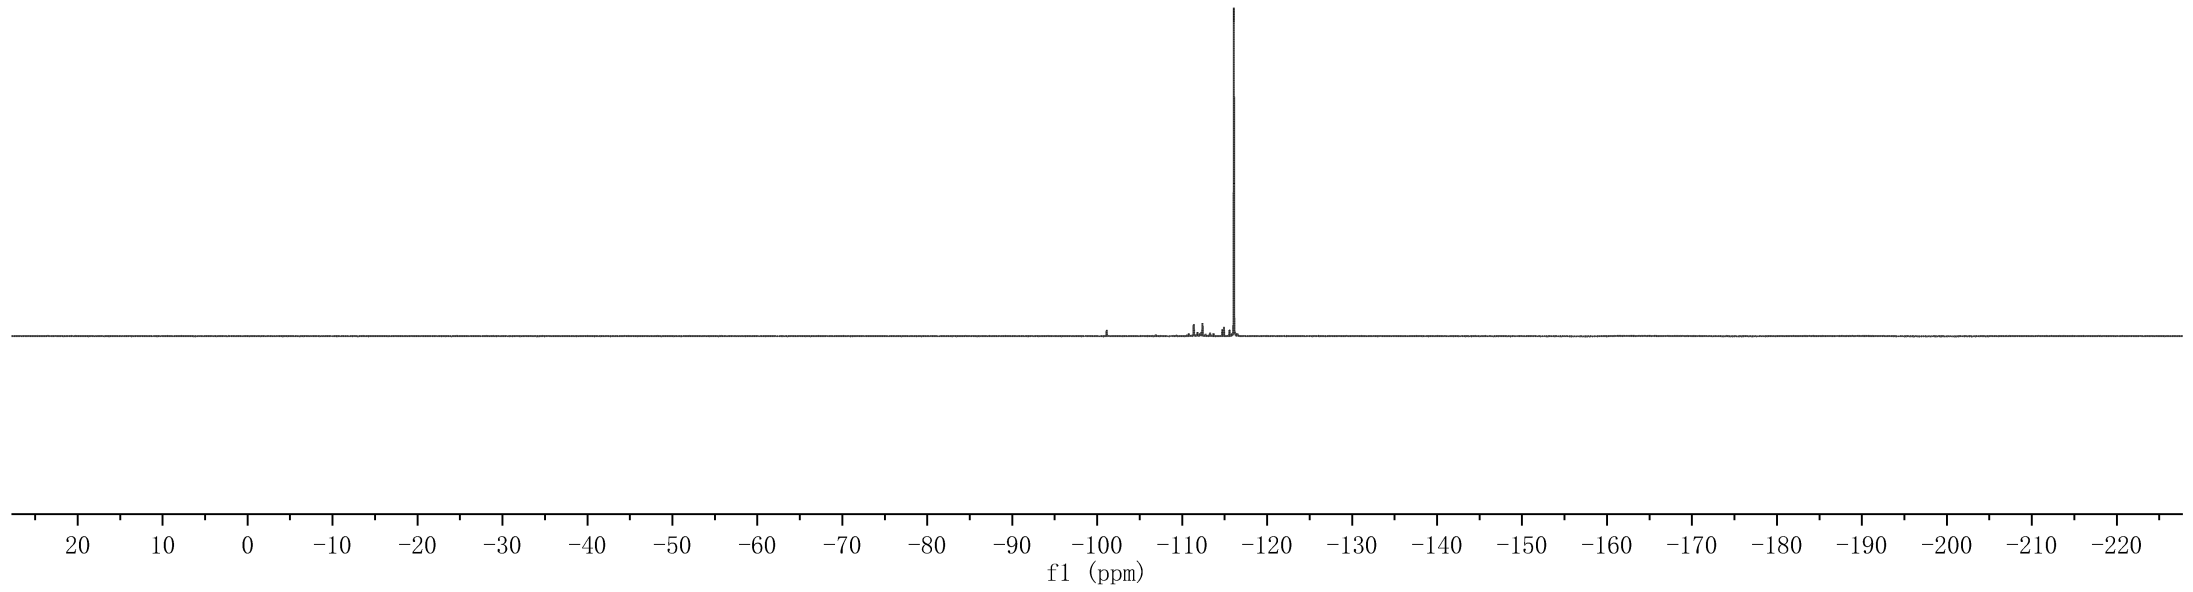

| Parameter                | Value               |
|--------------------------|---------------------|
| 1 Title                  | FXY-7-149           |
| 2 Origin                 | Bruker BioSpin GmbH |
| 3 Solvent                | CDC13               |
| 4 Temperature            | 298.0               |
| 5 Number of Scans        | 3                   |
| 6 Acquisition Time       | 4.0894              |
| 7 Acquisition Date       | 2022-02-25T16:55:05 |
| 8 Spectrometer Frequency | 400.13              |
| 9 Spectral Width         | 8012.8              |

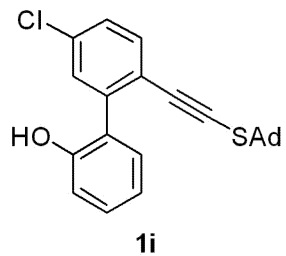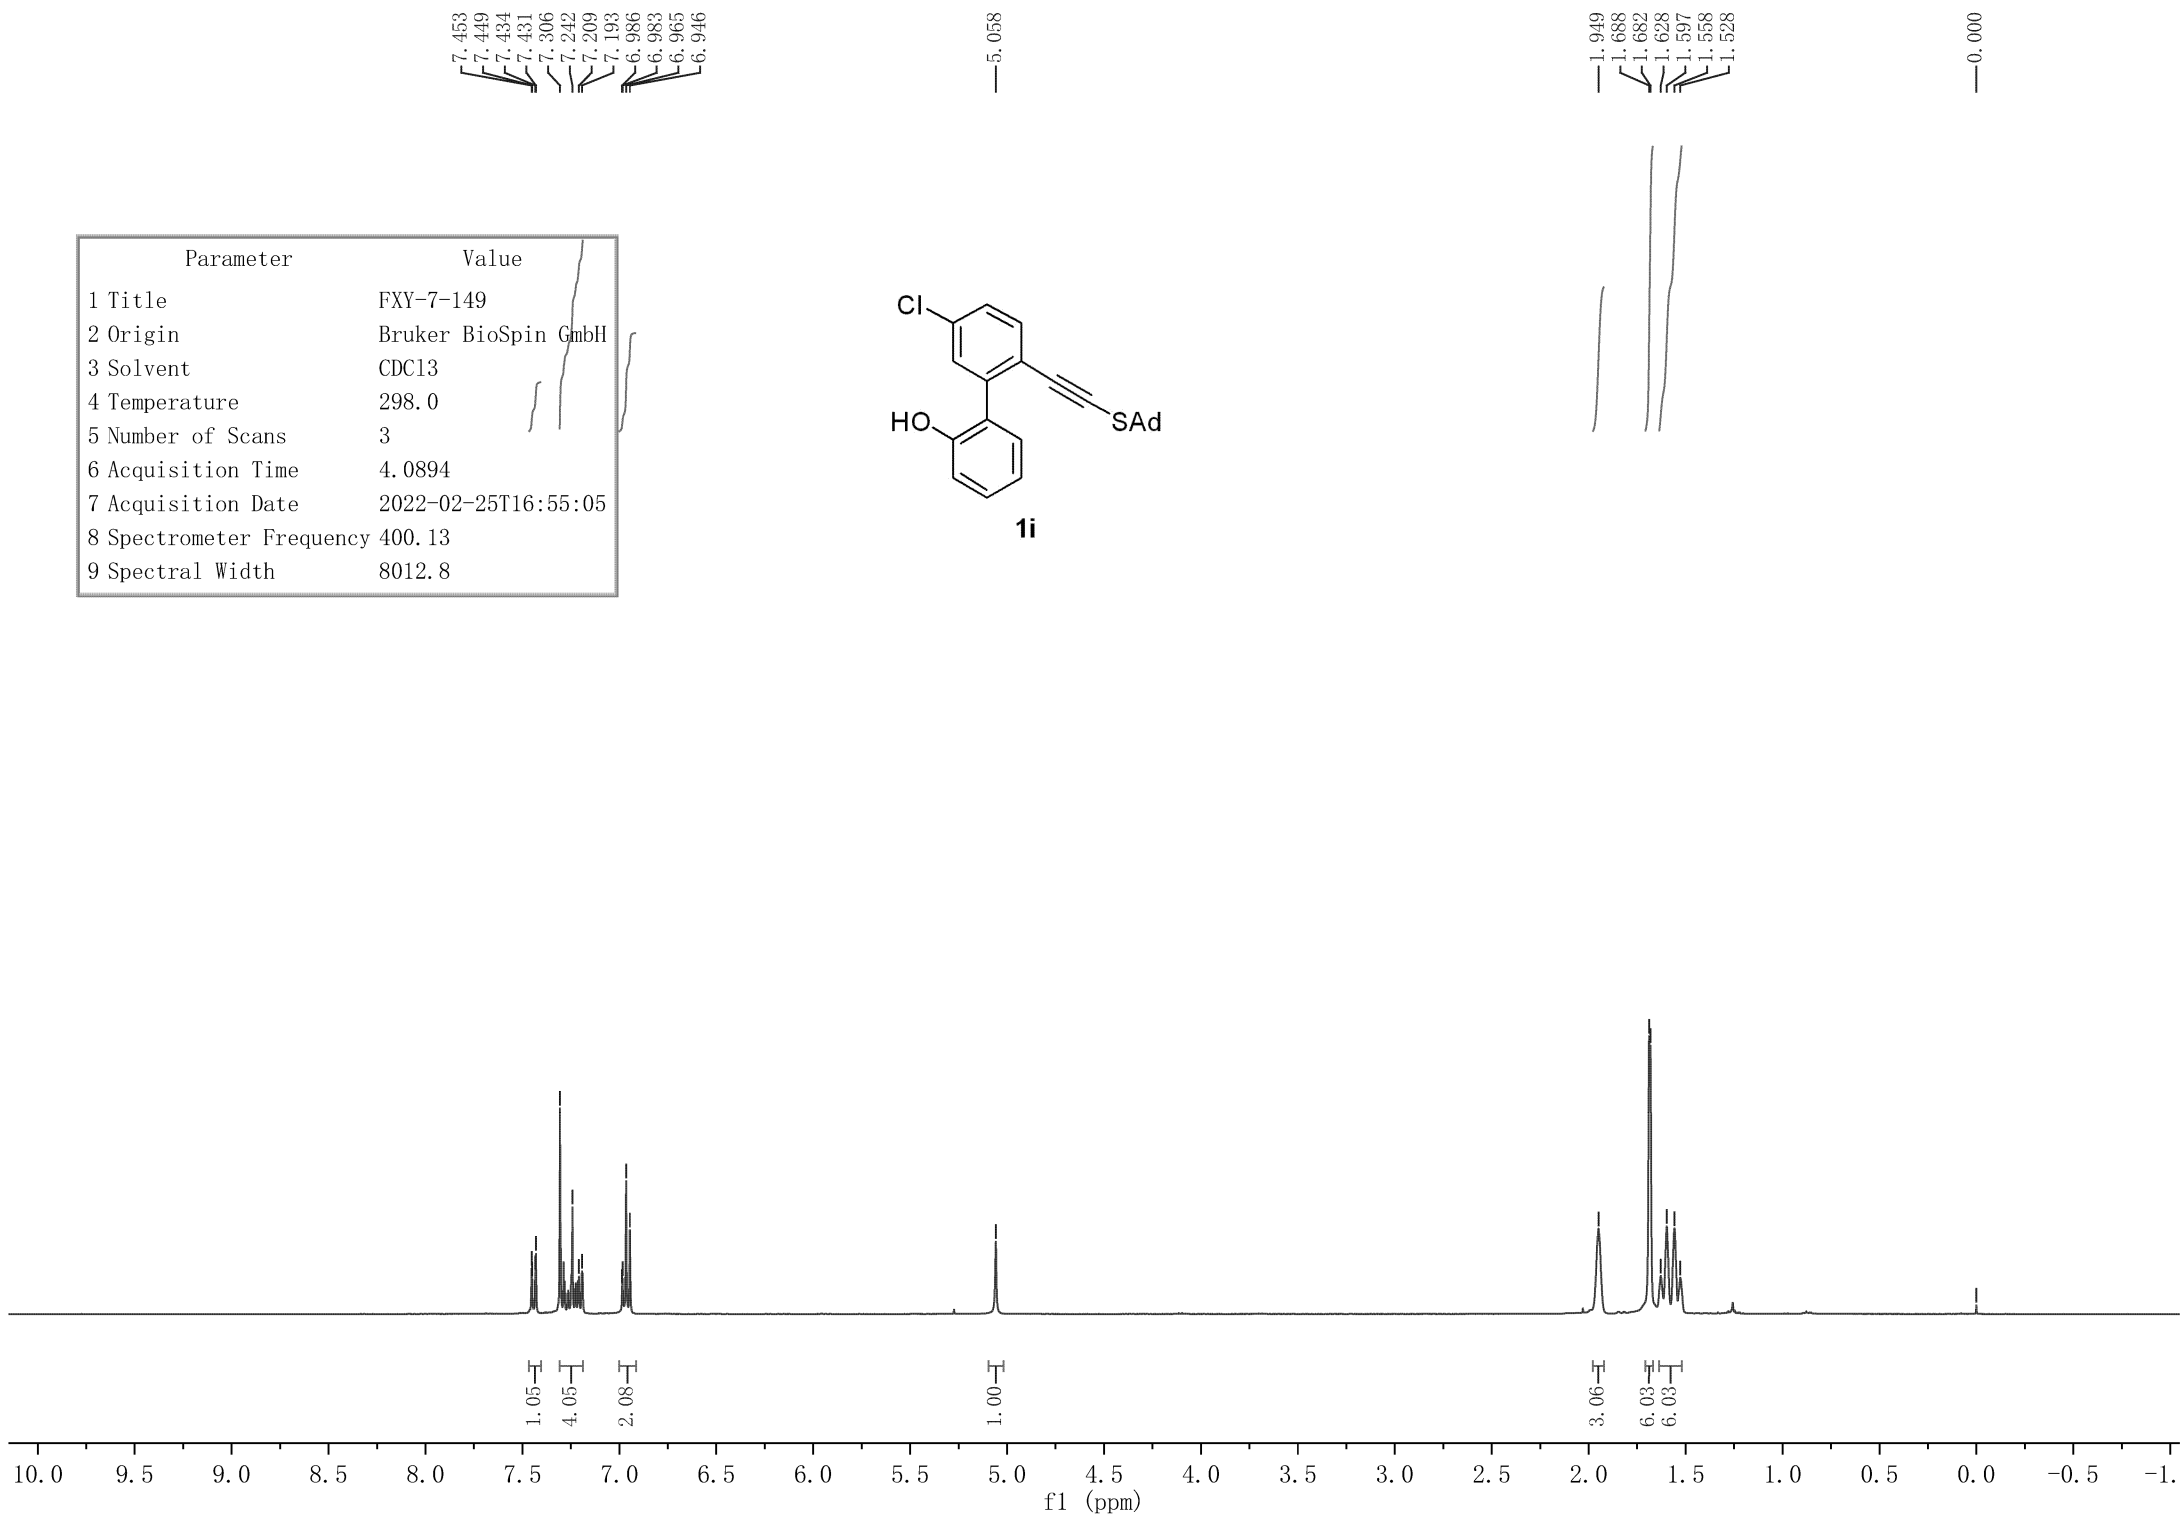

| Parameter                | Value               |
|--------------------------|---------------------|
| 1 Title                  | FXY-7-149C          |
| 2 Origin                 | Bruker BioSpin GmbH |
| 3 Solvent                | CDC13               |
| 4 Temperature            | 300.0               |
| 5 Number of Scans        | 12                  |
| 6 Acquisition Time       | 1.3631              |
| 7 Acquisition Date       | 2022-02-25T16:56:05 |
| 8 Spectrometer Frequency | 100.61              |
| 9 Spectral Width         | 24038.5             |

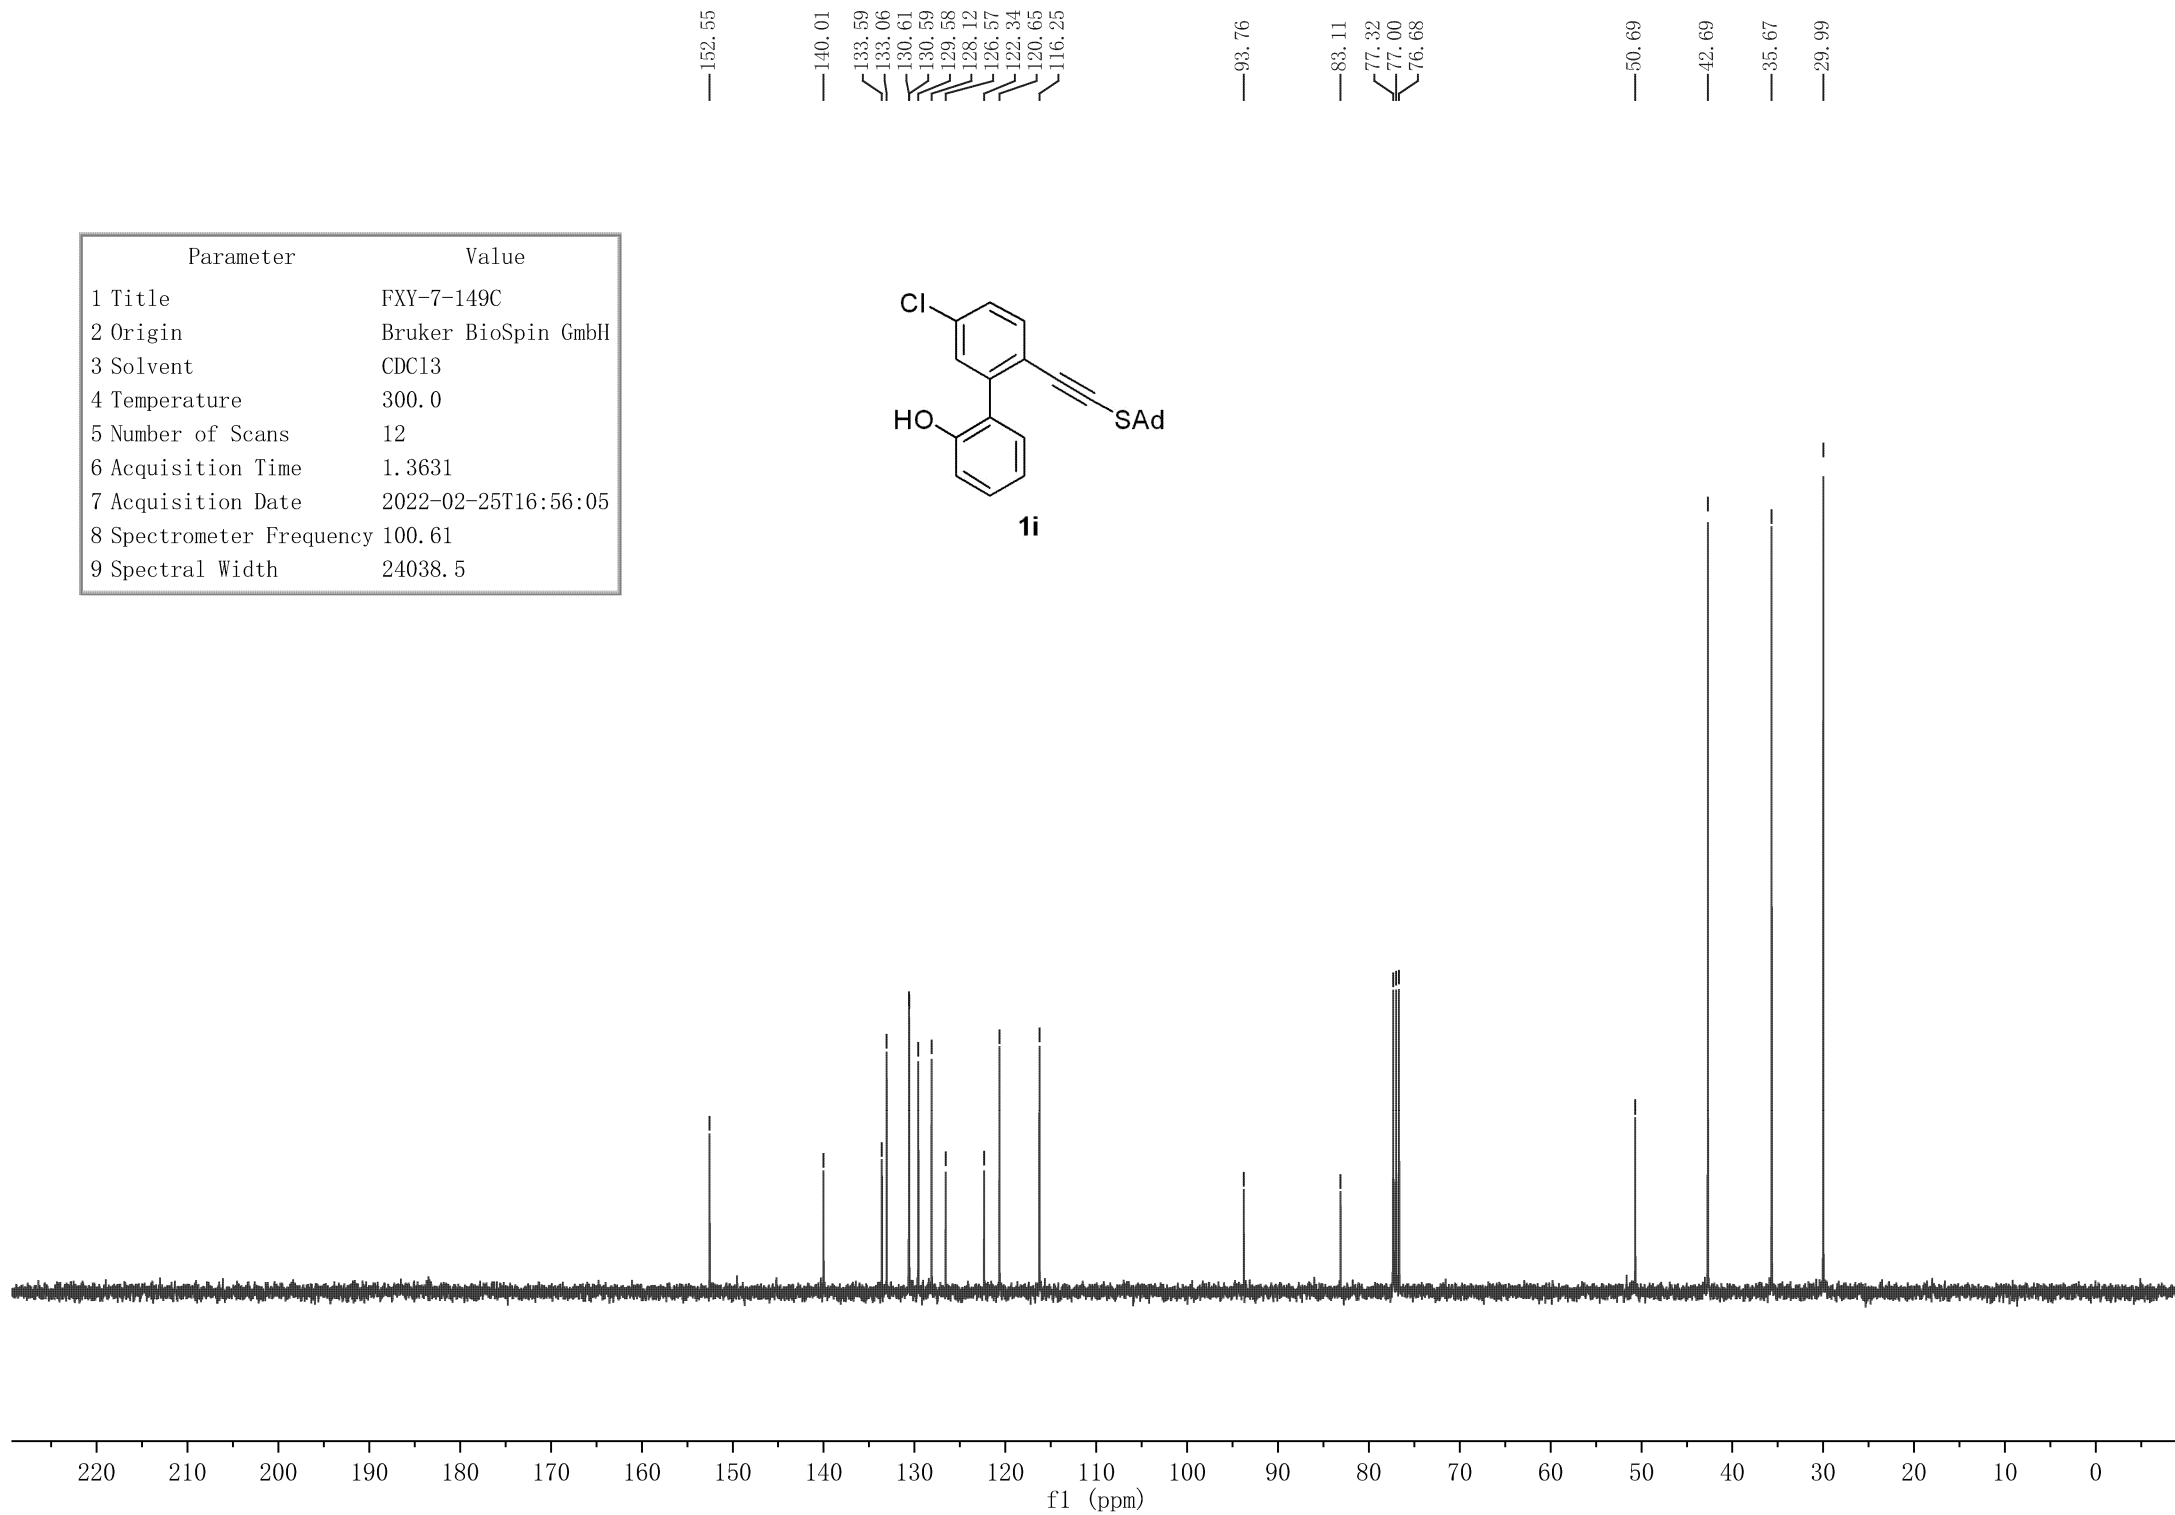

| Parameter                | Value               |
|--------------------------|---------------------|
| 1 Title                  | 1j                  |
| 2 Origin                 |                     |
| 3 Solvent                | CDC13               |
| 4 Temperature            | 297.6               |
| 5 Number of Scans        | 32                  |
| 6 Acquisition Time       | 4.0002              |
| 7 Acquisition Date       | 2022-01-19T01:11:53 |
| 8 Spectrometer Frequency | 399.93              |
| 9 Spectral Width         | 8012.0              |

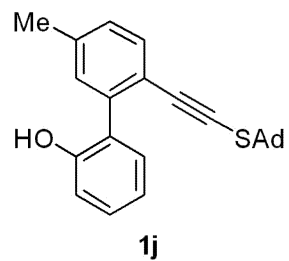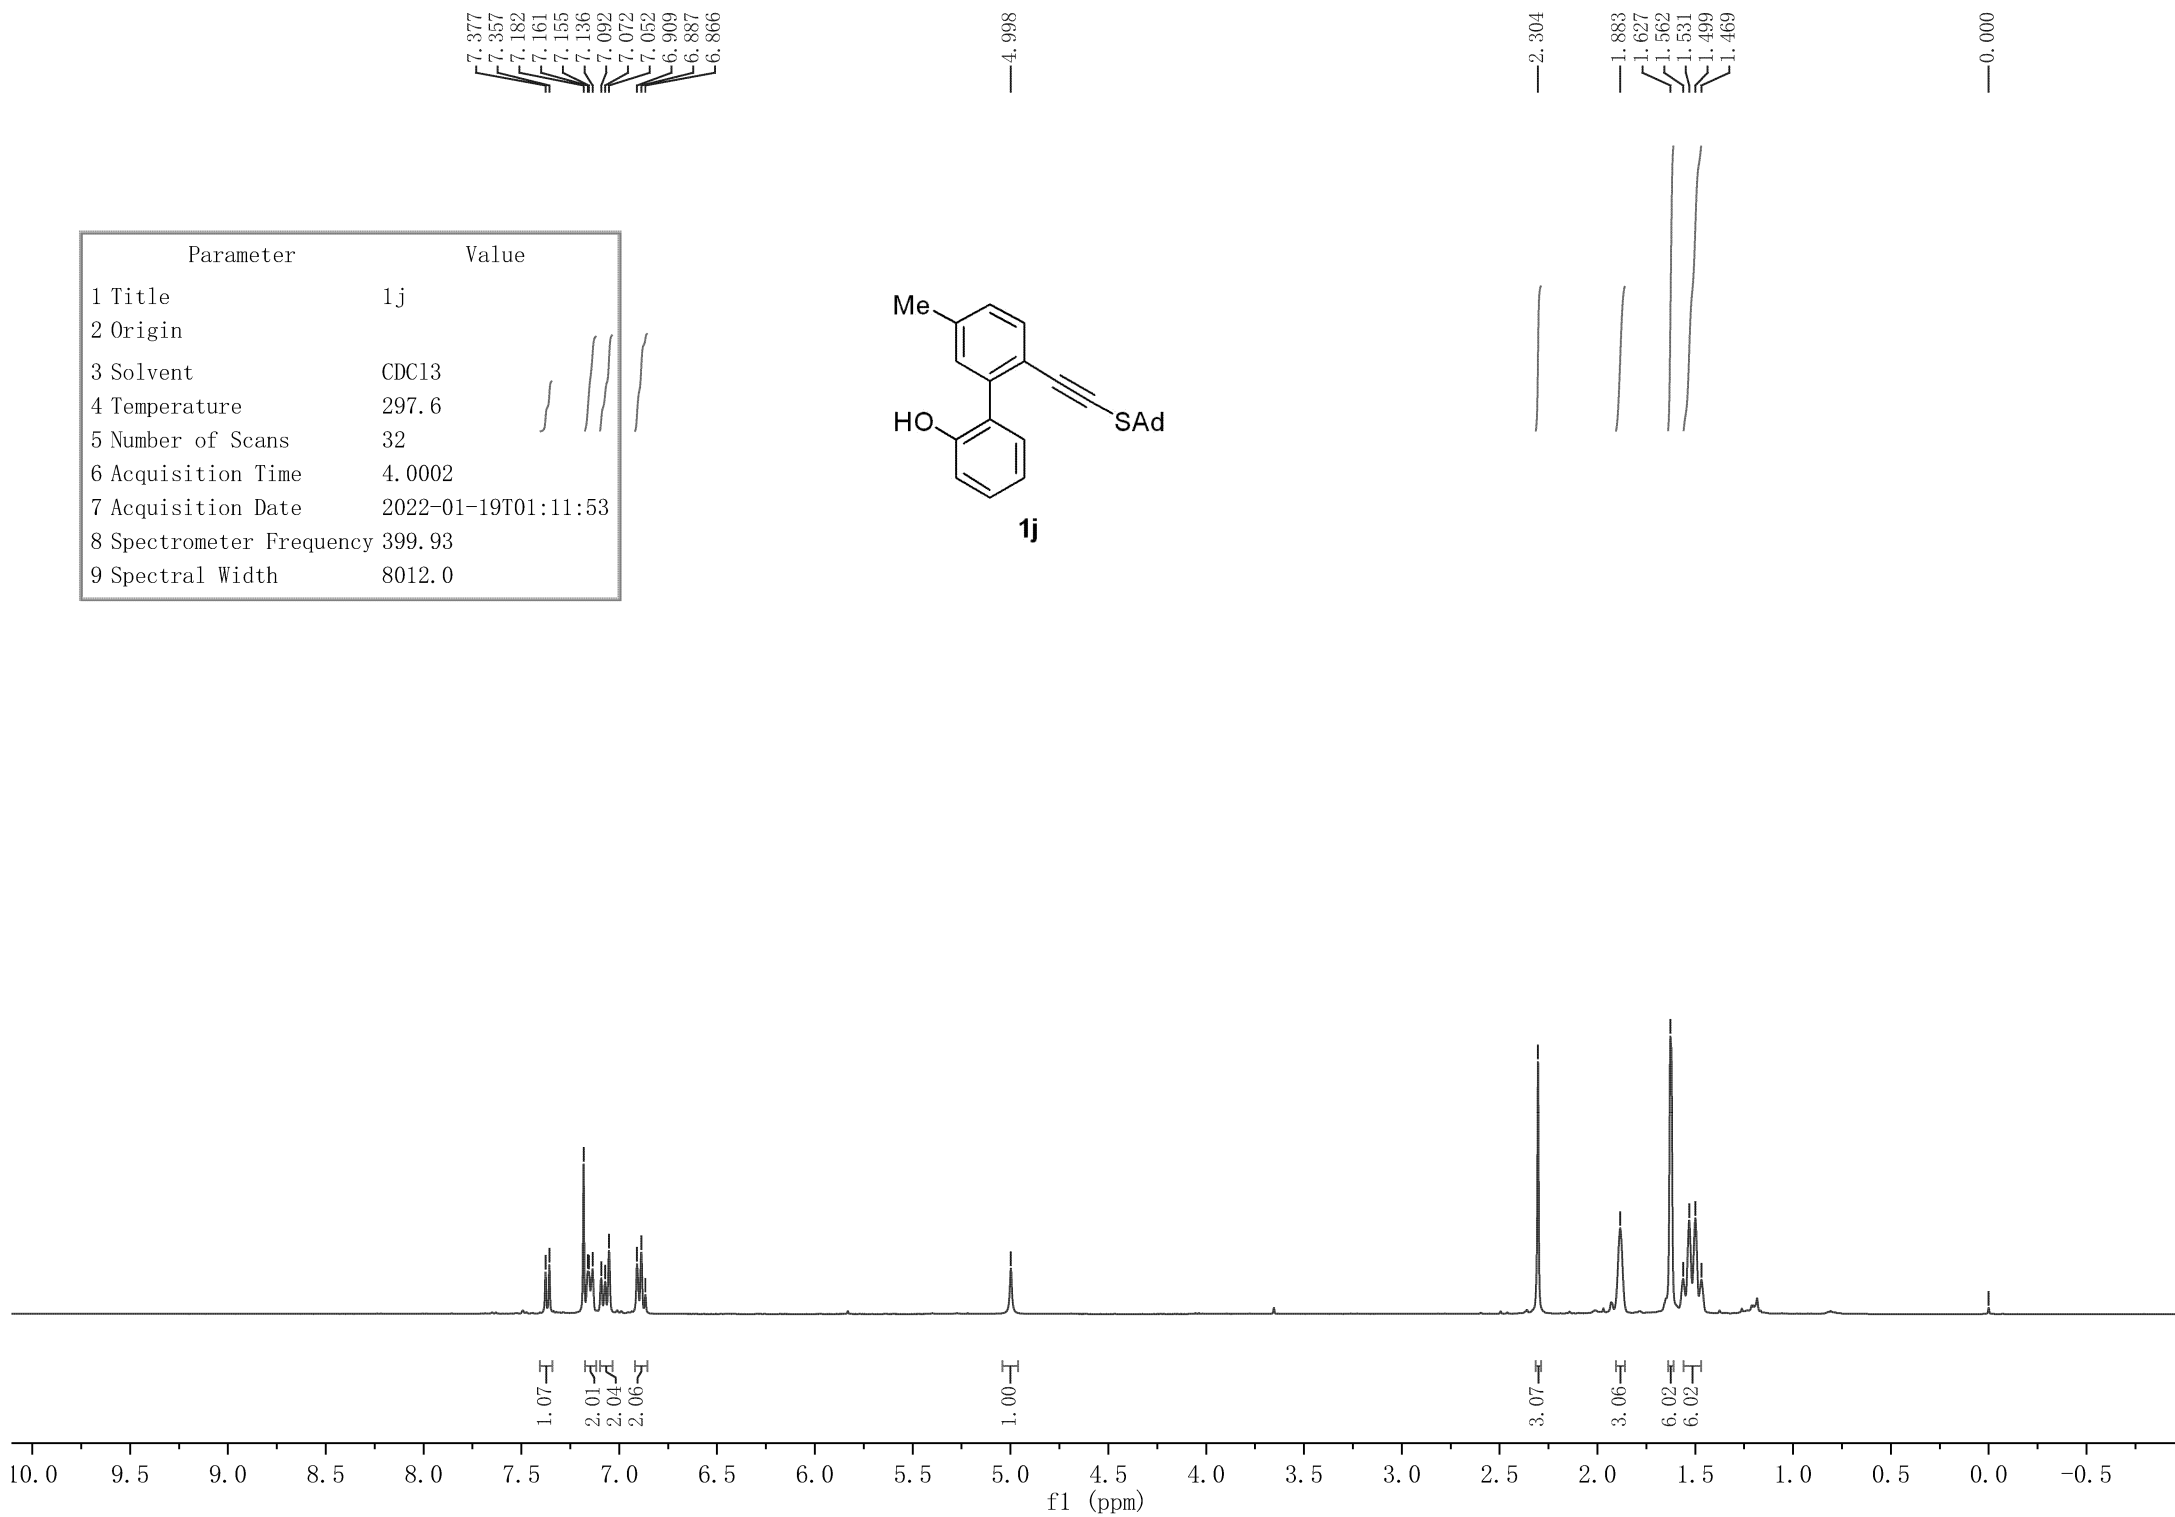

| Parameter                | Value               |
|--------------------------|---------------------|
| 1 Title                  | 1j                  |
| 2 Origin                 |                     |
| 3 Solvent                | CDC13               |
| 4 Temperature            | 297.8               |
| 5 Number of Scans        | 400                 |
| 6 Acquisition Time       | 1.0000              |
| 7 Acquisition Date       | 2022-01-19T01:27:42 |
| 8 Spectrometer Frequency | 100.56              |
| 9 Spectral Width         | 26041.0             |

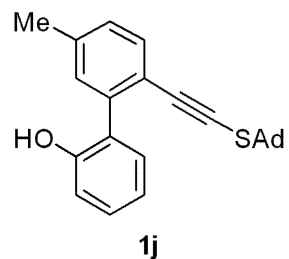

152.70  
 138.40 138.19  
 132.16 131.21 130.65 129.12 128.88 128.88 120.44 115.94  
 94.54  
 80.86 77.32 77.00 76.68  
 50.43 42.70 35.77 30.04 21.38

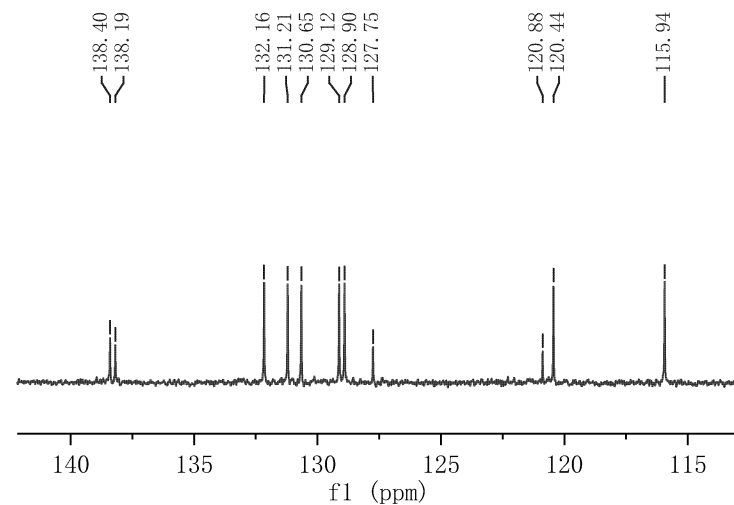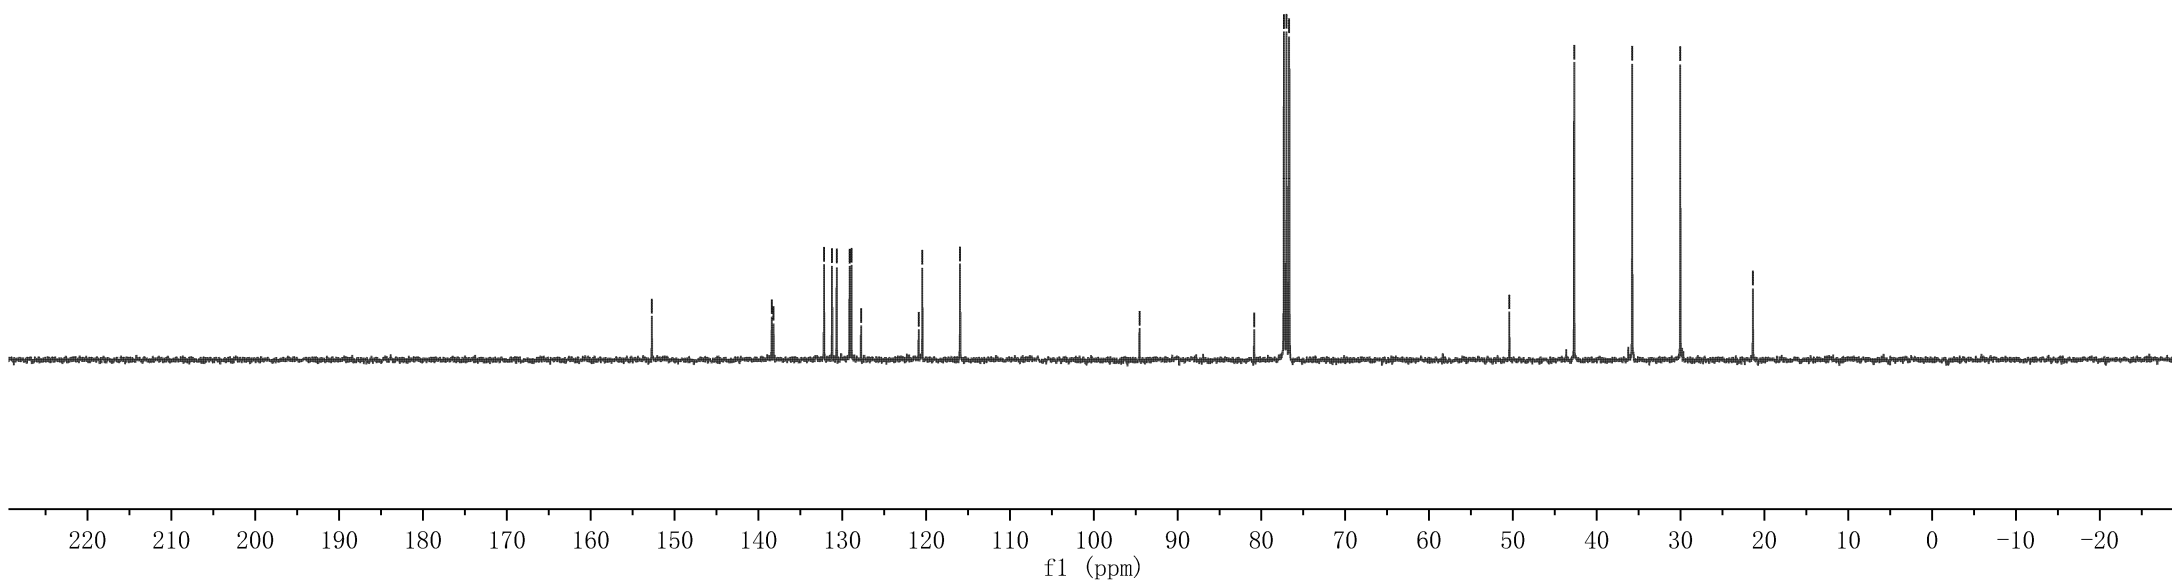



| Parameter                | Value               |
|--------------------------|---------------------|
| 1 Title                  | FXY-8-181-h         |
| 2 Origin                 |                     |
| 3 Solvent                | CDC13               |
| 4 Temperature            | 299.6               |
| 5 Number of Scans        | 16                  |
| 6 Acquisition Time       | 4.0002              |
| 7 Acquisition Date       | 2022-06-15T22:21:52 |
| 8 Spectrometer Frequency | 399.92              |
| 9 Spectral Width         | 8012.0              |

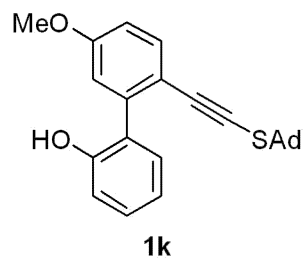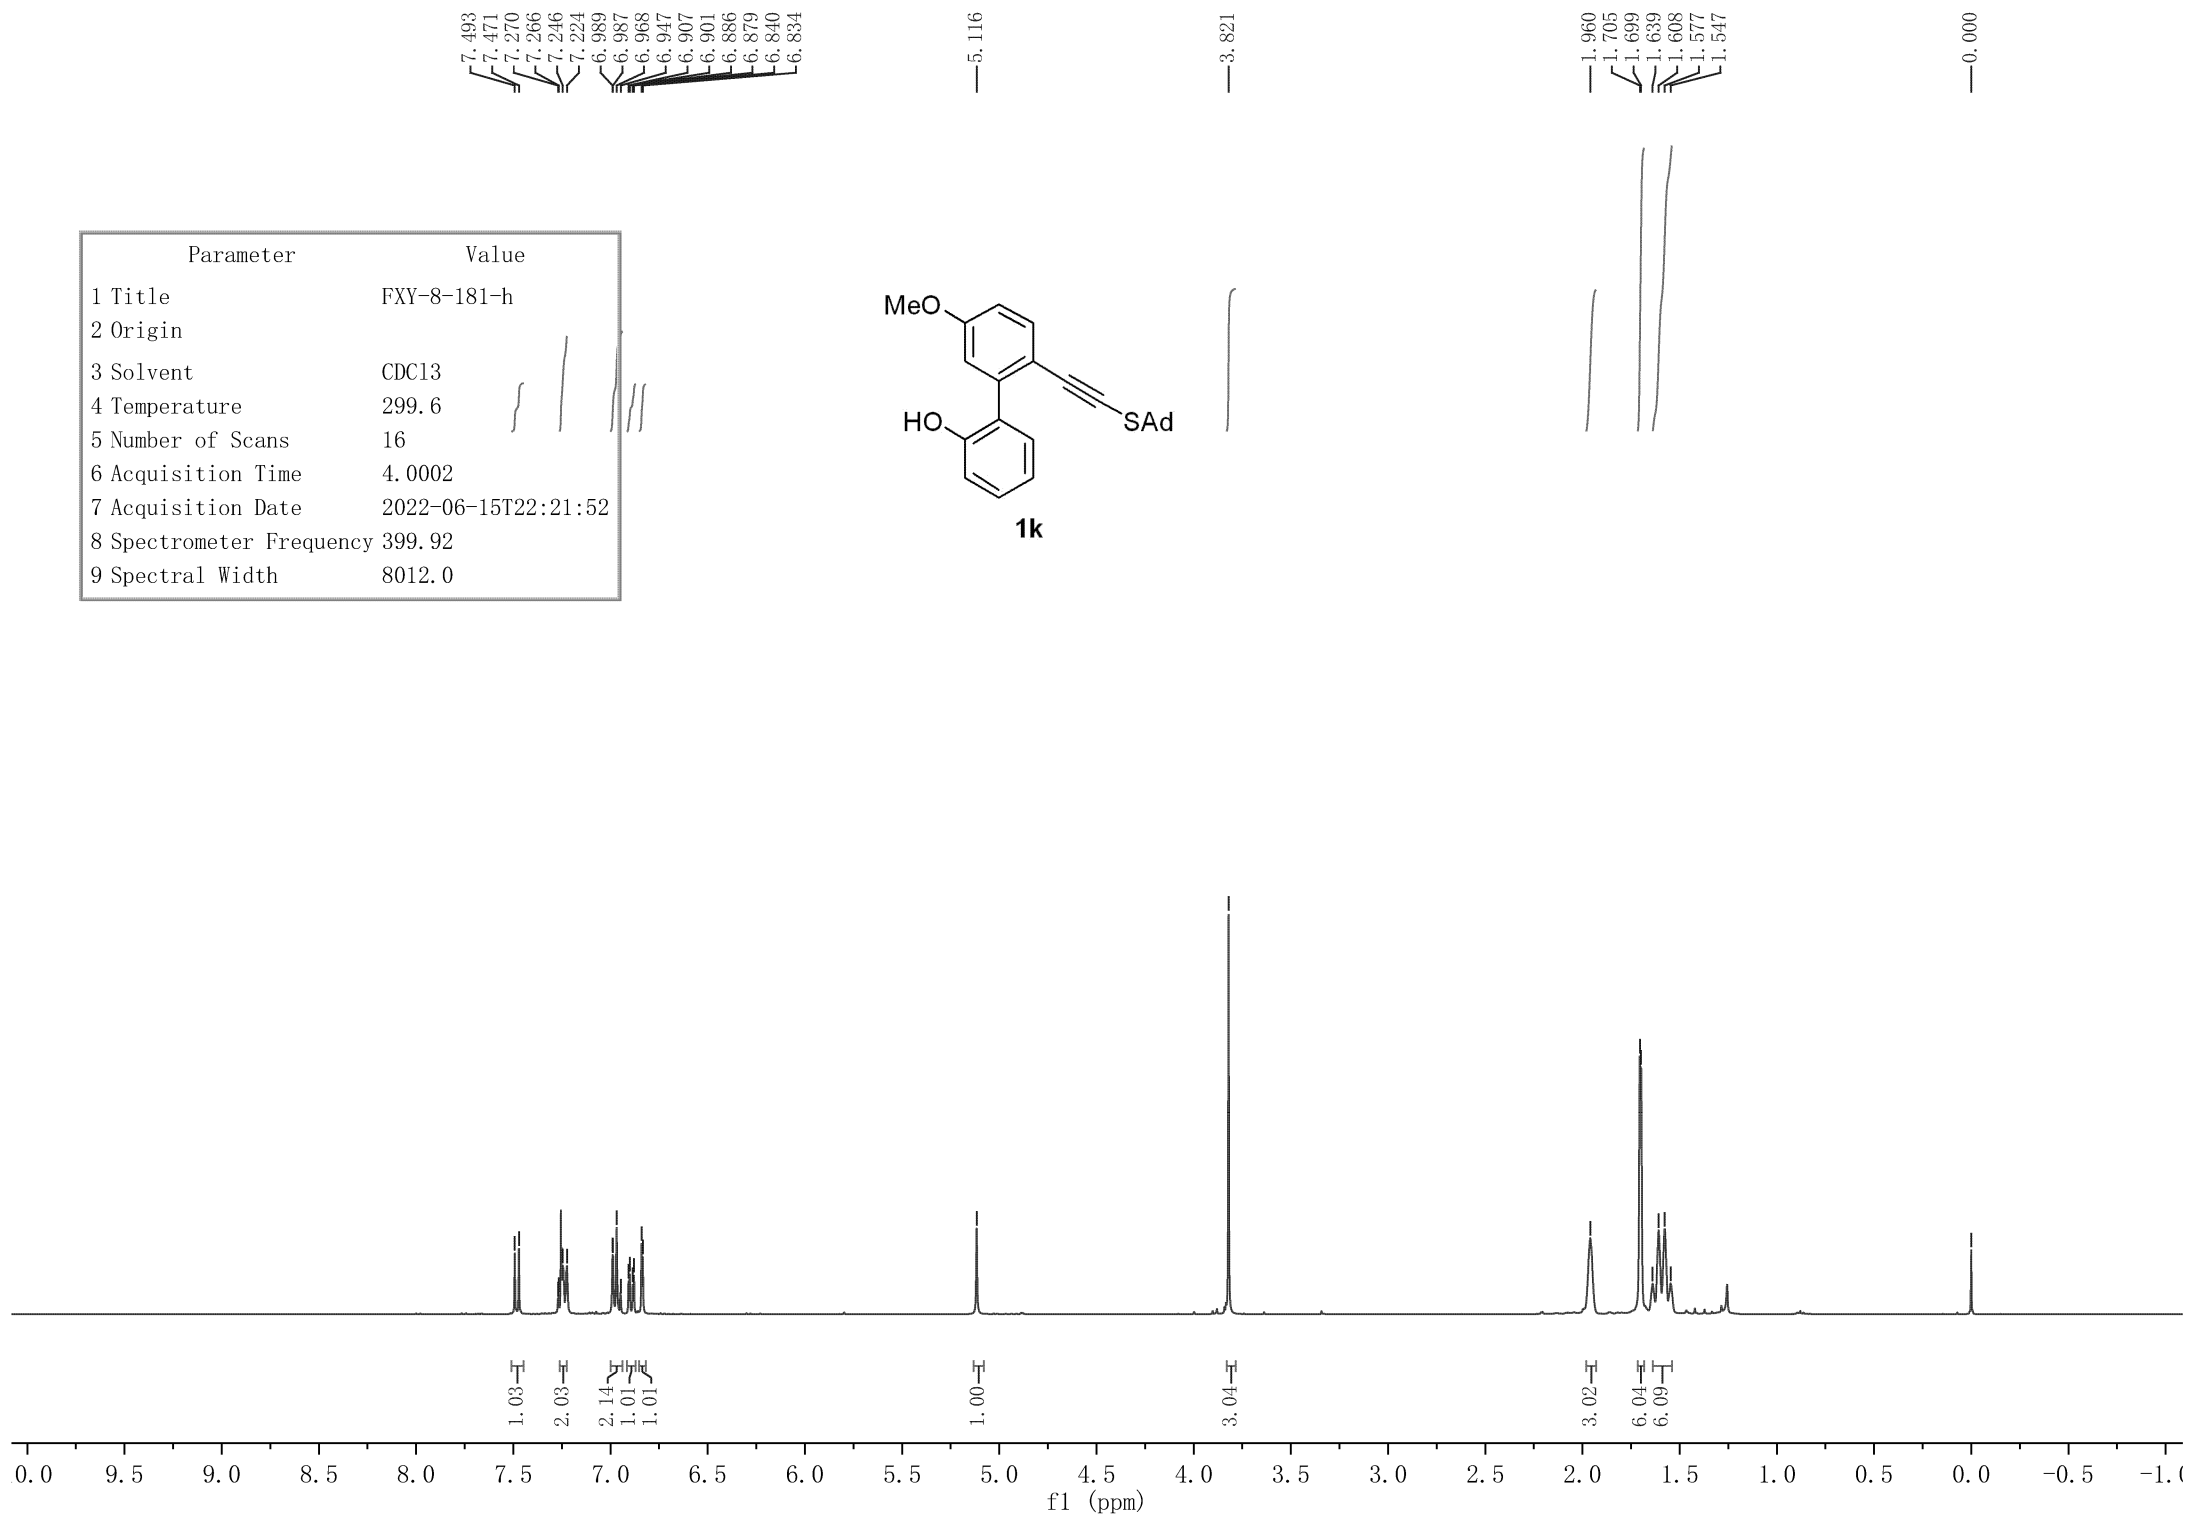

| Parameter                | Value               |
|--------------------------|---------------------|
| 1 Title                  | FXY-8-181-h         |
| 2 Origin                 |                     |
| 3 Solvent                | CDC13               |
| 4 Temperature            | 299.8               |
| 5 Number of Scans        | 500                 |
| 6 Acquisition Time       | 1.0000              |
| 7 Acquisition Date       | 2022-06-15T22:40:45 |
| 8 Spectrometer Frequency | 100.56              |
| 9 Spectral Width         | 26041.0             |

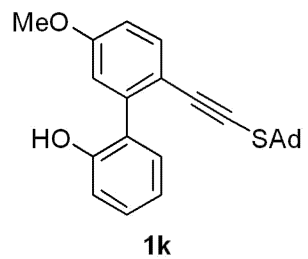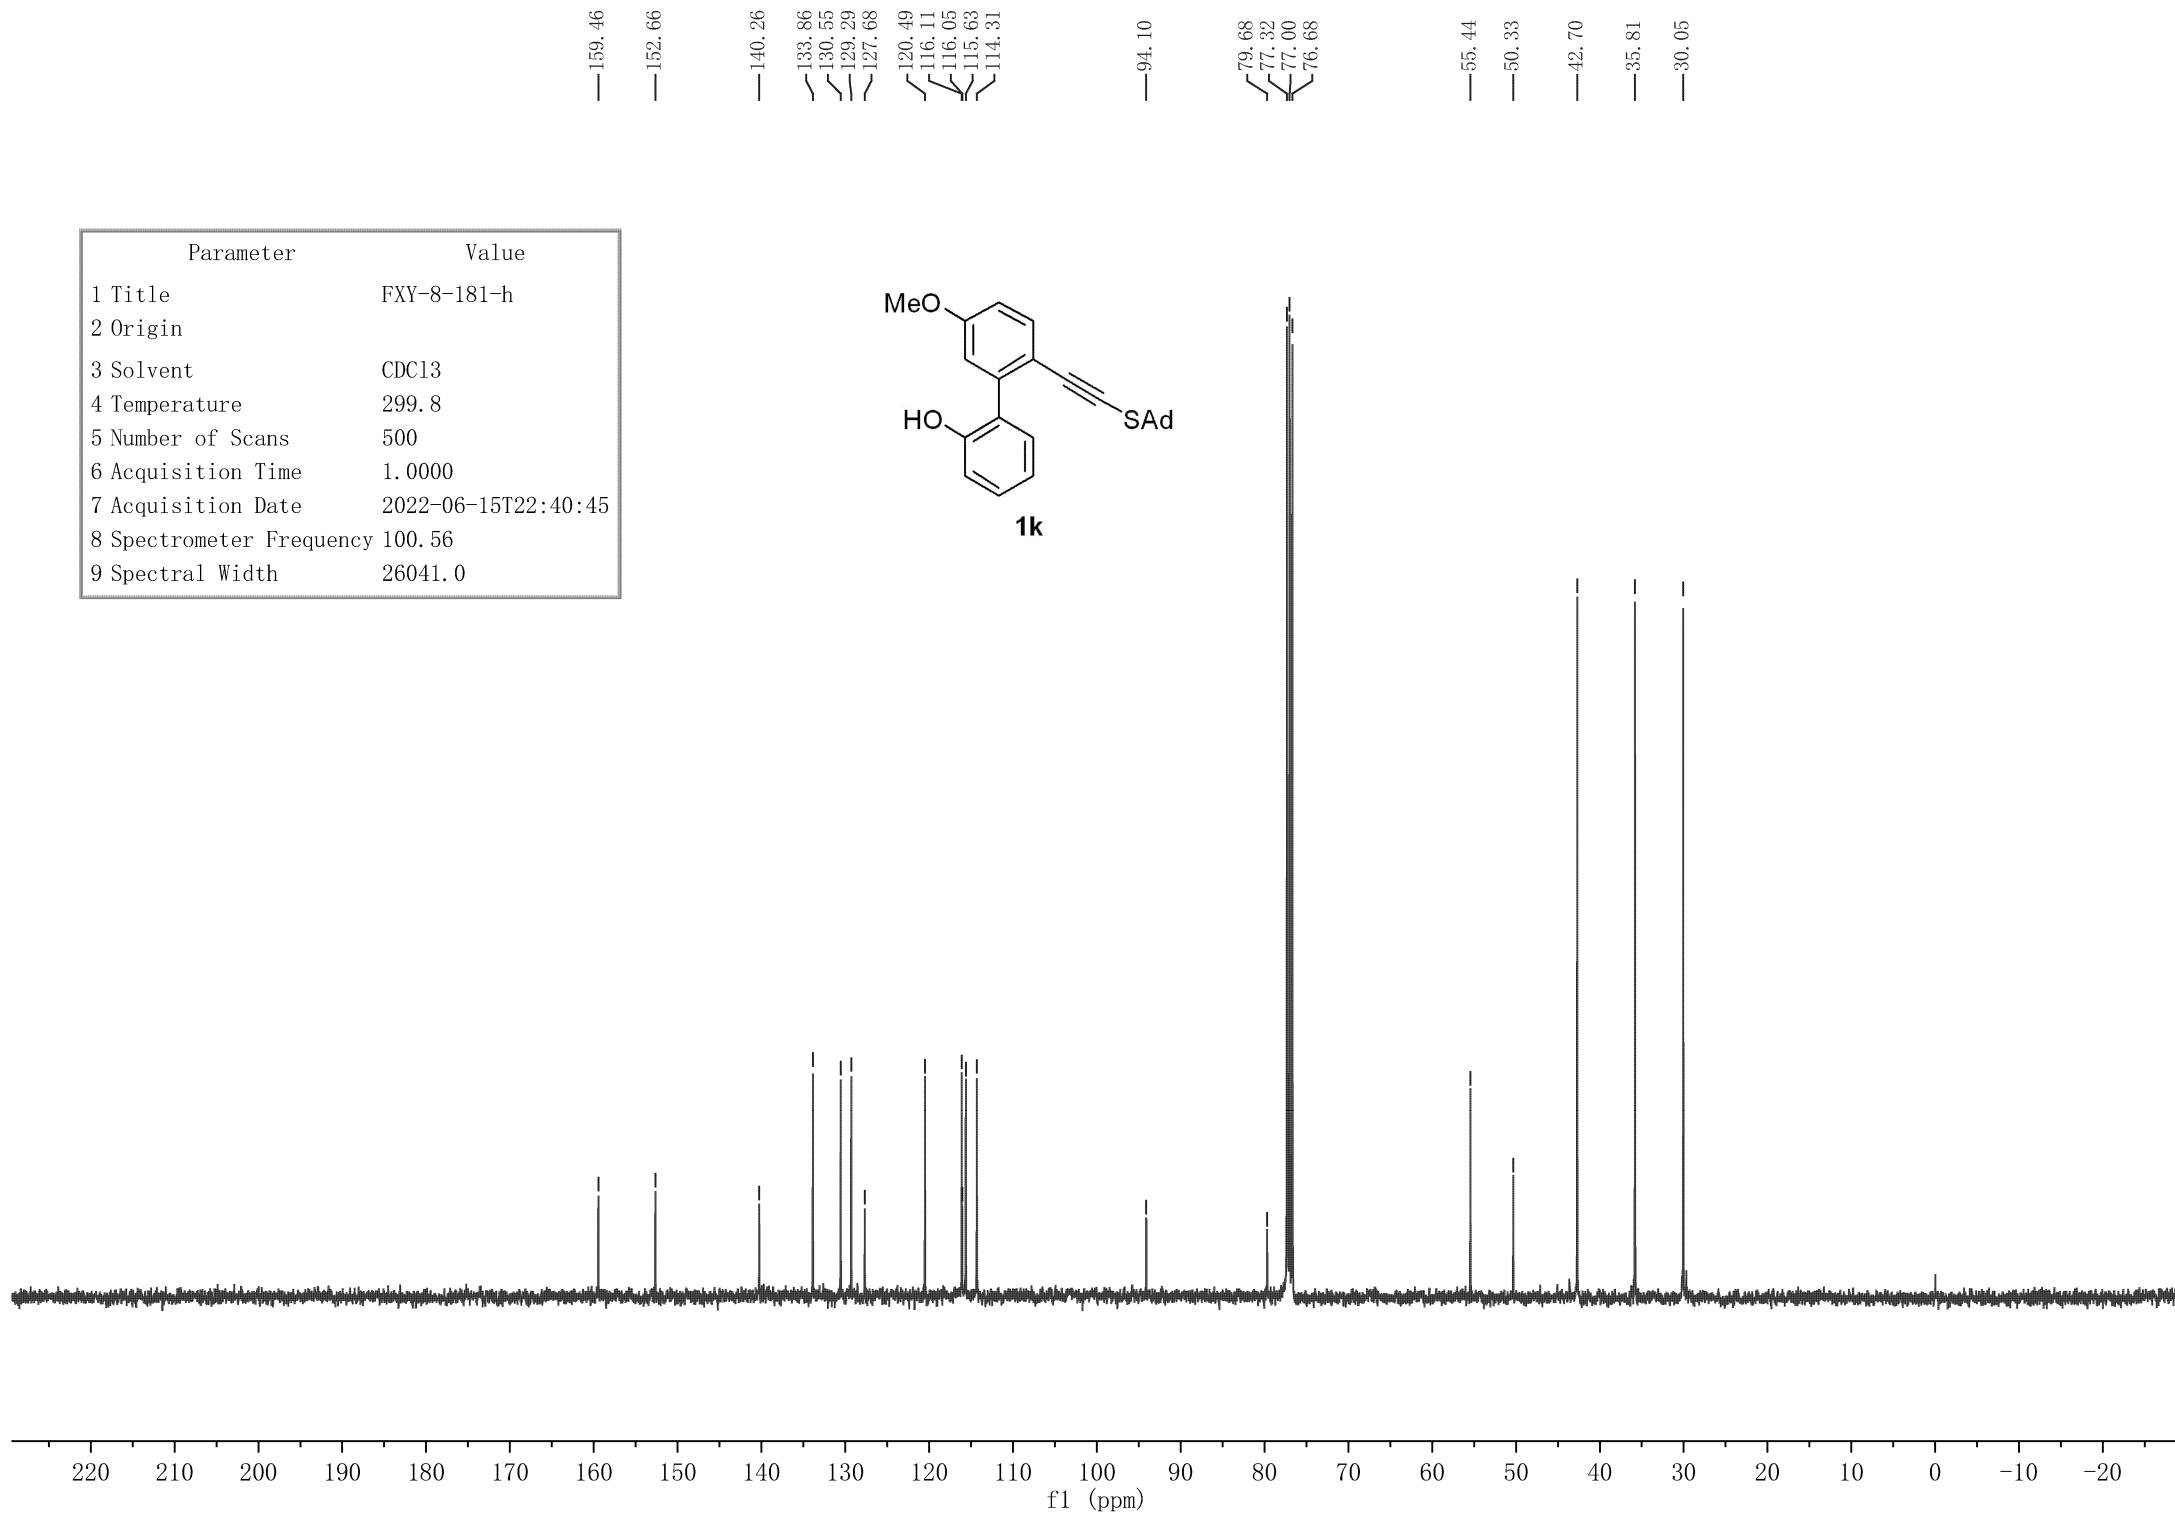

7.454  
7.452  
7.435  
7.432  
7.280  
7.261  
7.255  
7.237  
7.224  
7.213  
7.205  
7.201  
7.198  
6.987  
6.972  
6.967  
6.955

5.001

1.983  
1.771  
1.765  
1.651  
1.620  
1.592  
1.561

0.000

| Parameter                | Value               |
|--------------------------|---------------------|
| 1 Title                  | fxy--7-137-2        |
| 2 Origin                 |                     |
| 3 Solvent                | CDC13               |
| 4 Temperature            | 296.9               |
| 5 Number of Scans        | 16                  |
| 6 Acquisition Time       | 4.0002              |
| 7 Acquisition Date       | 2022-04-07T16:52:57 |
| 8 Spectrometer Frequency | 399.93              |
| 9 Spectral Width         | 8012.0              |

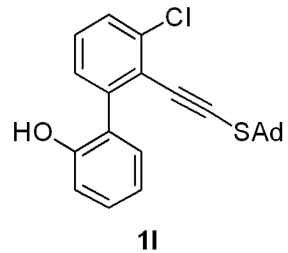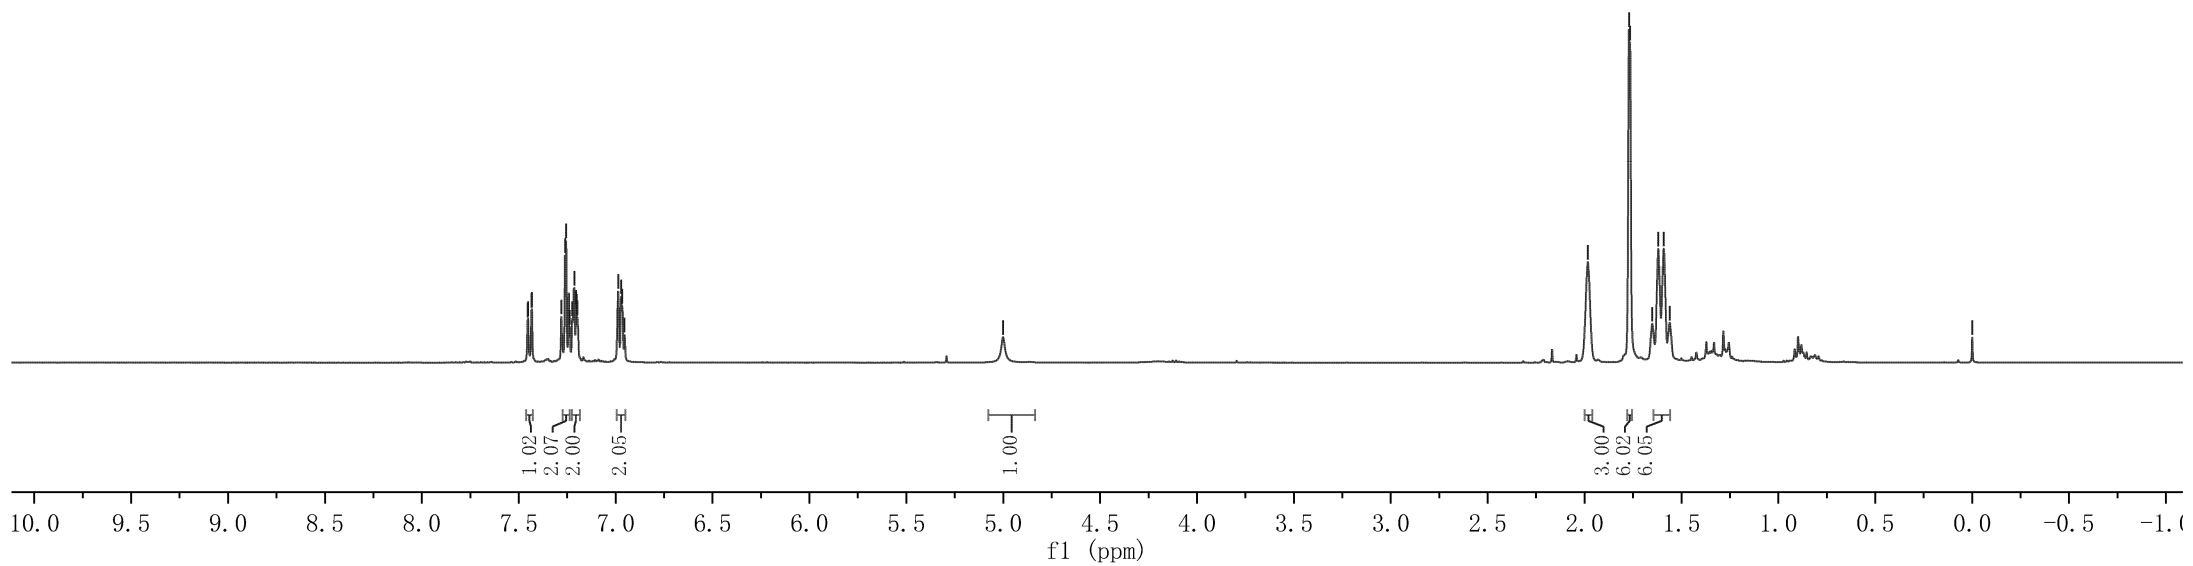

| Parameter                | Value               |
|--------------------------|---------------------|
| 1 Title                  | fxv--7-137-2        |
| 2 Origin                 |                     |
| 3 Solvent                | CDC13               |
| 4 Temperature            | 297.3               |
| 5 Number of Scans        | 500                 |
| 6 Acquisition Time       | 1.0000              |
| 7 Acquisition Date       | 2022-04-07T17:11:46 |
| 8 Spectrometer Frequency | 100.56              |
| 9 Spectral Width         | 26041.0             |

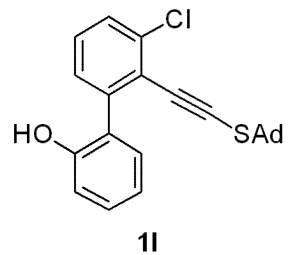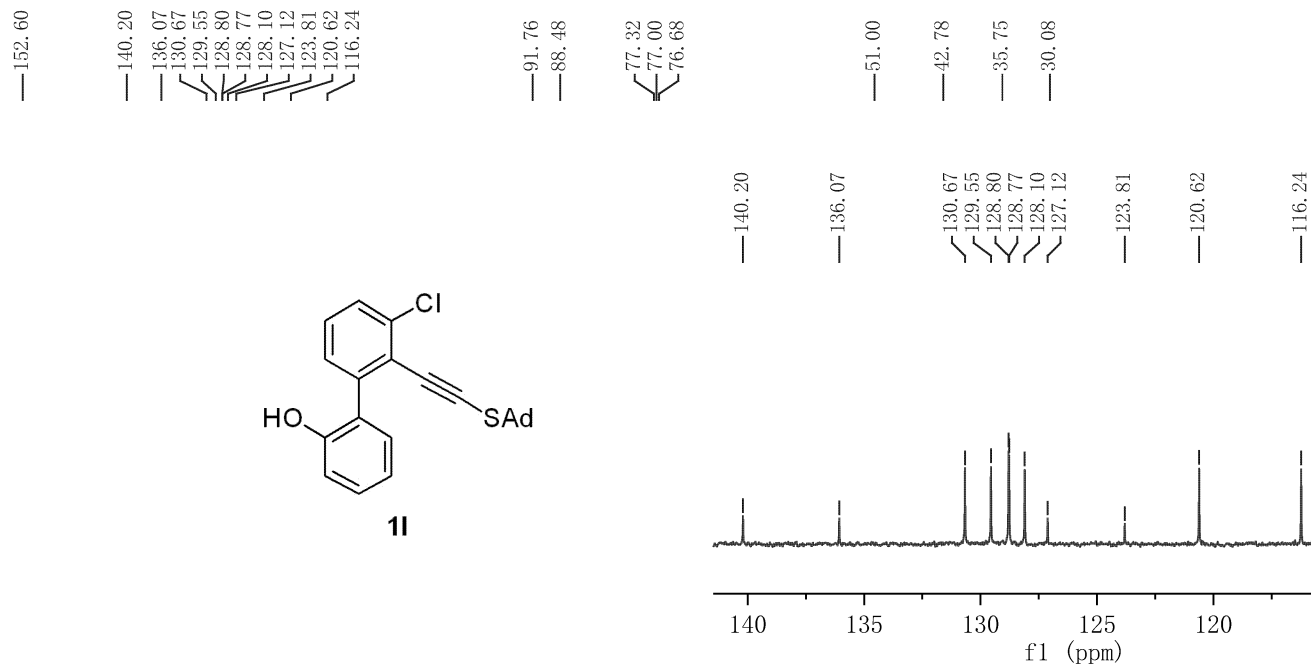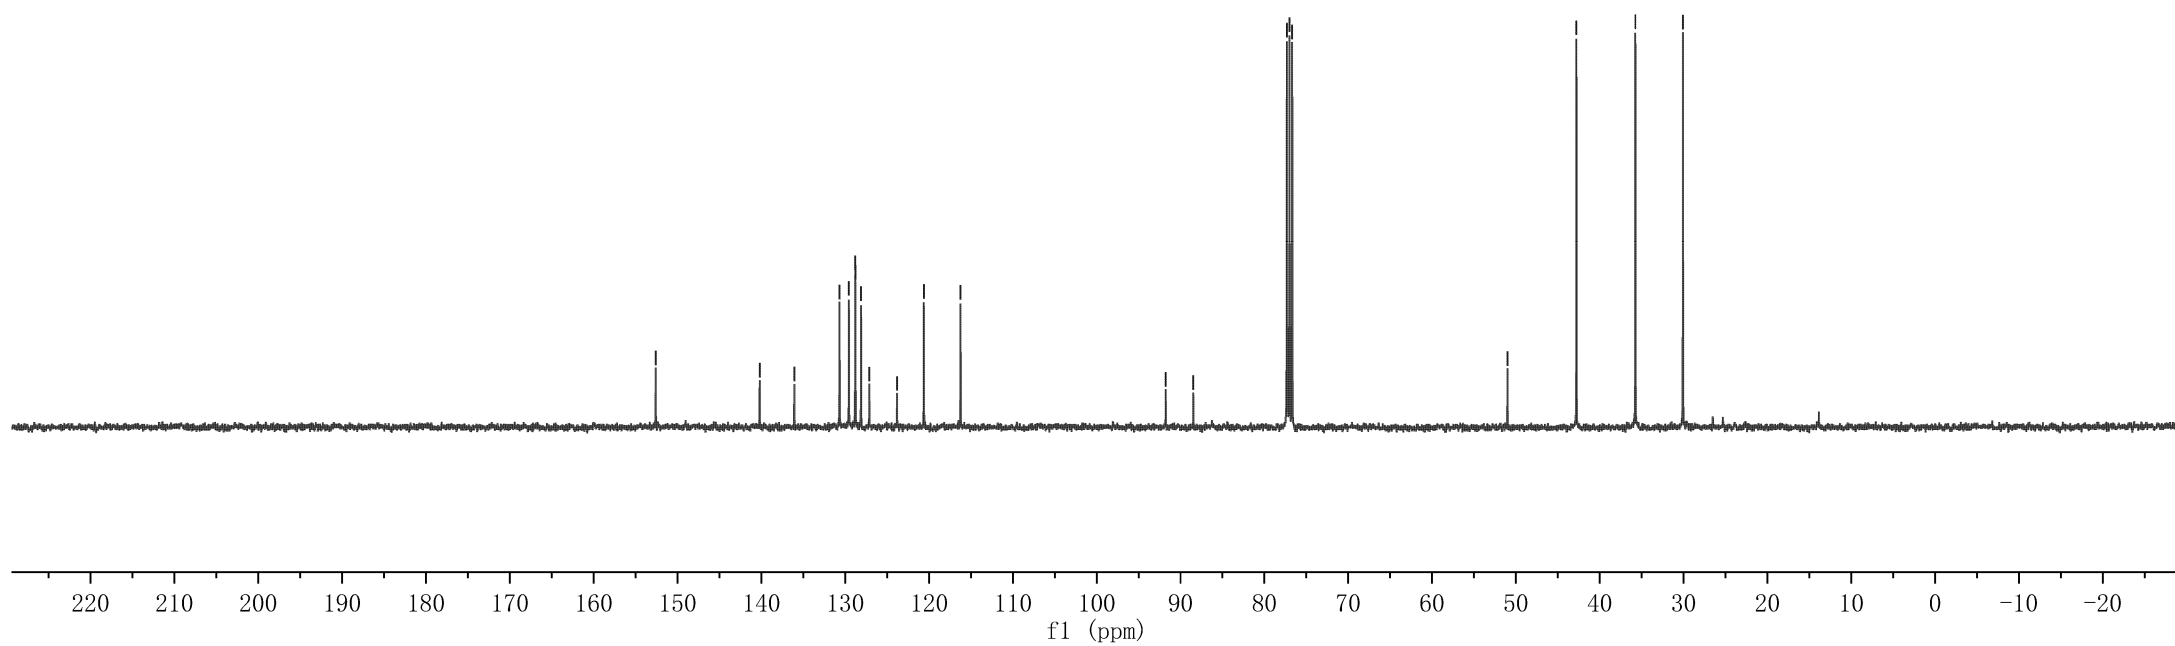

| Parameter                | Value               |
|--------------------------|---------------------|
| 1 Title                  | 1m                  |
| 2 Origin                 |                     |
| 3 Solvent                | CDC13               |
| 4 Temperature            | 298.8               |
| 5 Number of Scans        | 800                 |
| 6 Acquisition Time       | 1.0000              |
| 7 Acquisition Date       | 2022-05-17T18:38:41 |
| 8 Spectrometer Frequency | 100.56              |
| 9 Spectral Width         | 26041.0             |

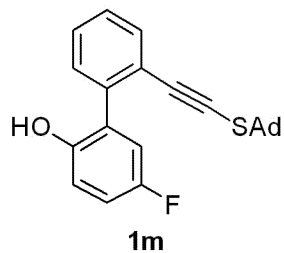

7.534  
7.521  
7.512  
7.363  
7.348  
7.338  
7.313  
7.282  
7.273  
7.260  
7.237  
6.967  
6.918  
6.906  
6.884

5.001

1.973  
1.727  
1.649  
1.618  
1.576  
1.546

0.000

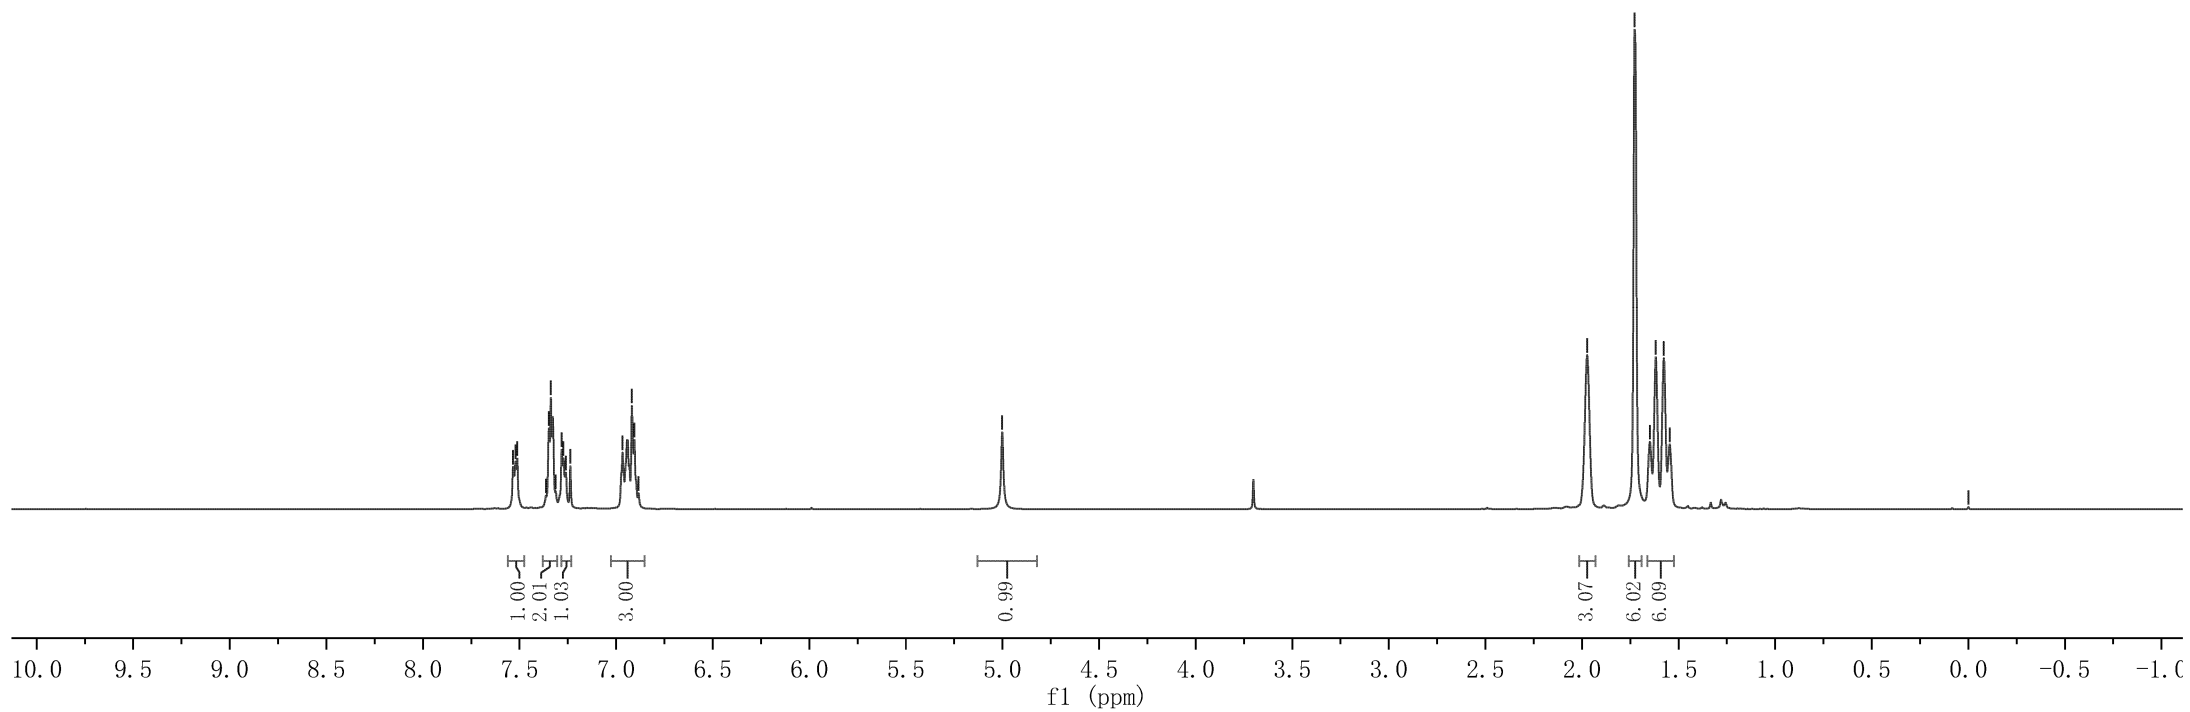

| Parameter                | Value               |
|--------------------------|---------------------|
| 1 Title                  | 1m                  |
| 2 Origin                 |                     |
| 3 Solvent                | CDC13               |
| 4 Temperature            | 298.8               |
| 5 Number of Scans        | 800                 |
| 6 Acquisition Time       | 1.0000              |
| 7 Acquisition Date       | 2022-05-17T18:38:41 |
| 8 Spectrometer Frequency | 100.56              |
| 9 Spectral Width         | 26041.0             |



157.84  
155.47  
148.82  
148.80  
137.16  
132.21  
130.23  
128.64  
128.56  
128.33  
128.08  
123.73  
117.04  
116.95  
116.81  
115.61  
115.38

94.29

82.55  
77.32  
77.00  
76.68

50.56

42.75

35.69

30.01

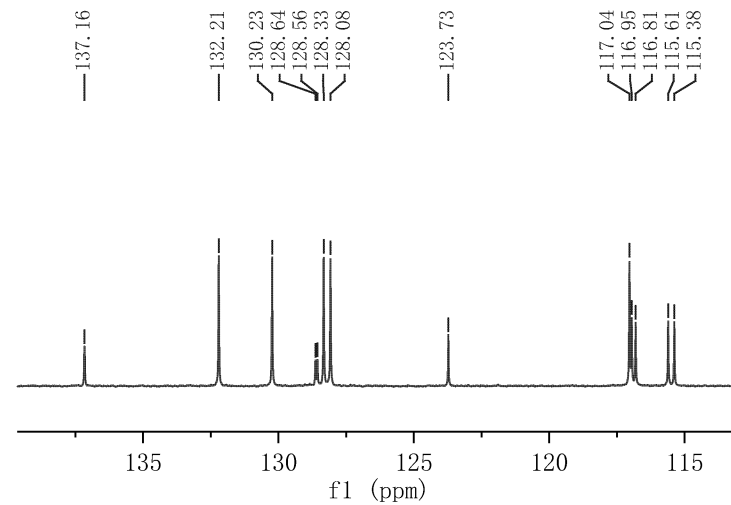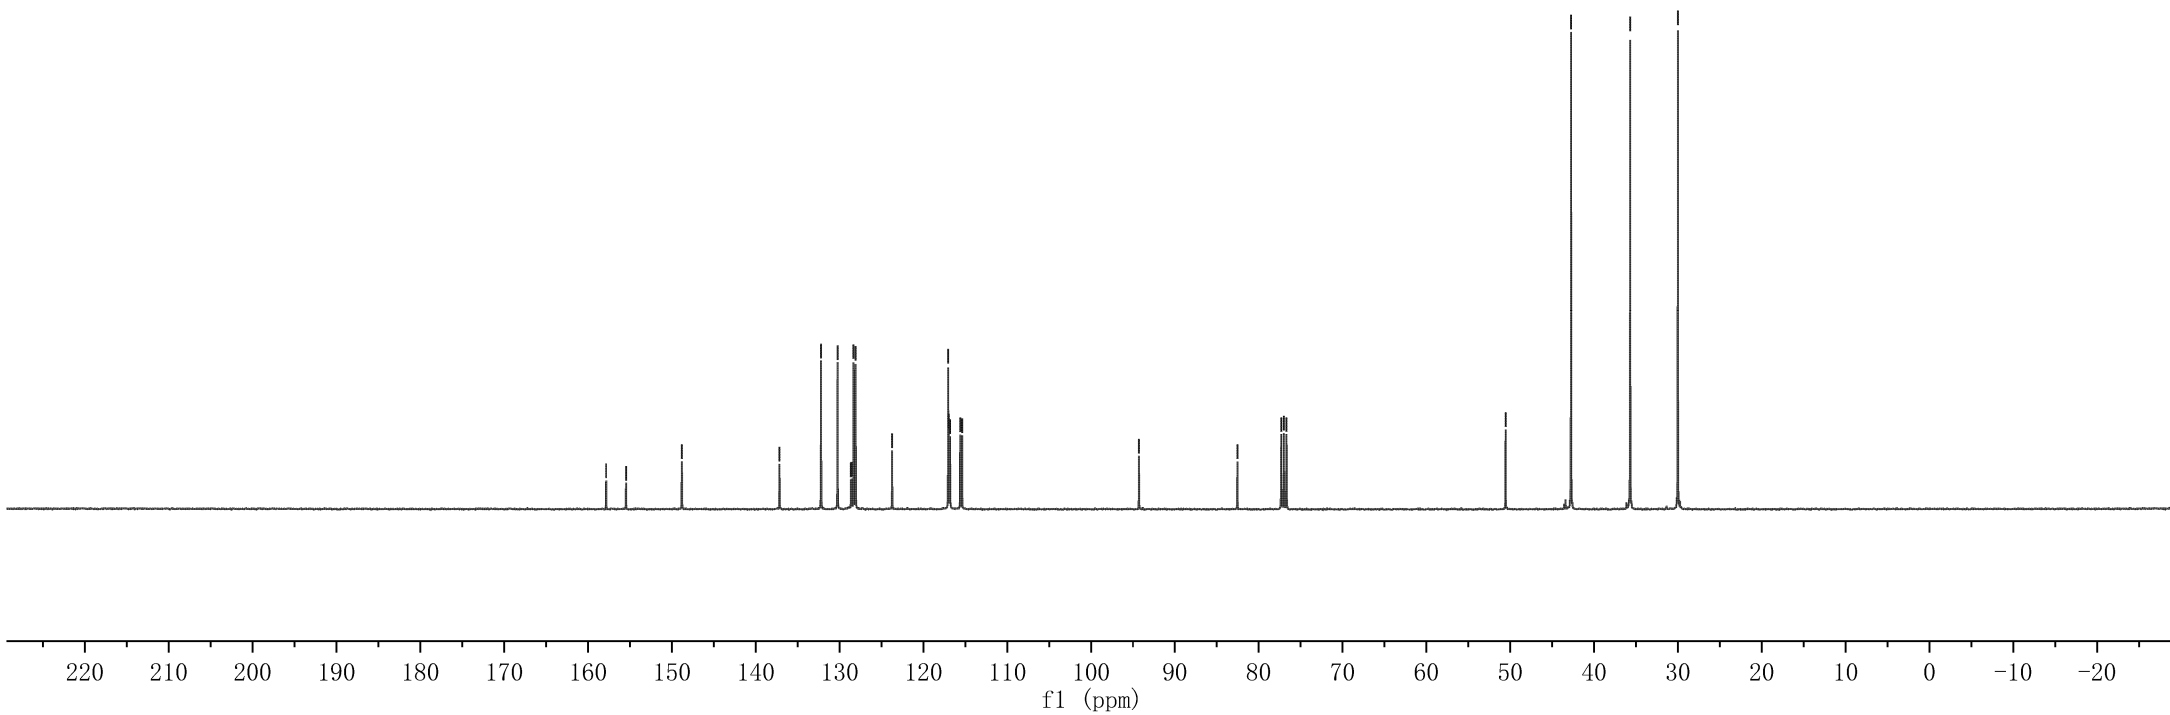

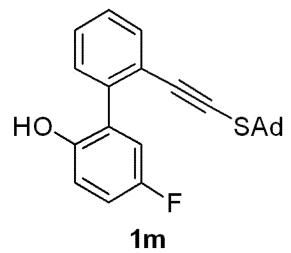

-115.30

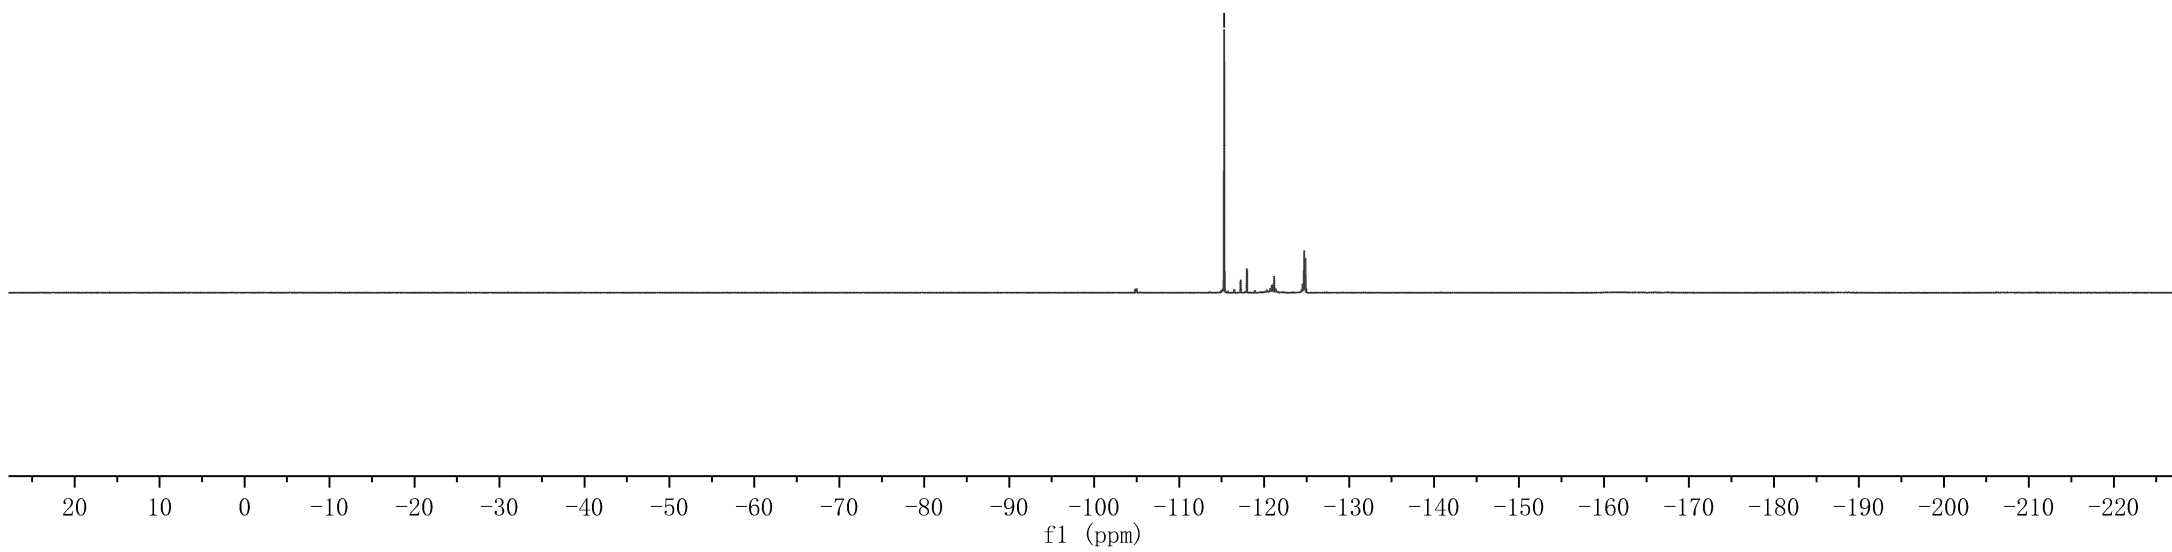

7.554  
7.548  
7.541  
7.531  
7.376  
7.365  
7.354  
7.289  
7.280  
7.273  
7.266  
7.229  
7.224  
7.193  
7.186  
6.932  
6.910

5.050

1.986  
1.725  
1.658  
1.627  
1.583  
1.553

0.000

| Parameter                | Value               |
|--------------------------|---------------------|
| 1 Title                  | fxv-7-165           |
| 2 Origin                 |                     |
| 3 Solvent                | CDC13               |
| 4 Temperature            | 297.5               |
| 5 Number of Scans        | 16                  |
| 6 Acquisition Time       | 4.0002              |
| 7 Acquisition Date       | 2022-03-02T10:49:29 |
| 8 Spectrometer Frequency | 399.93              |
| 9 Spectral Width         | 8012.0              |

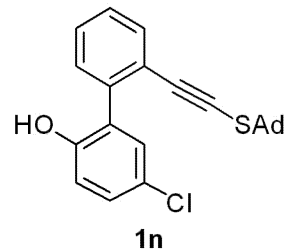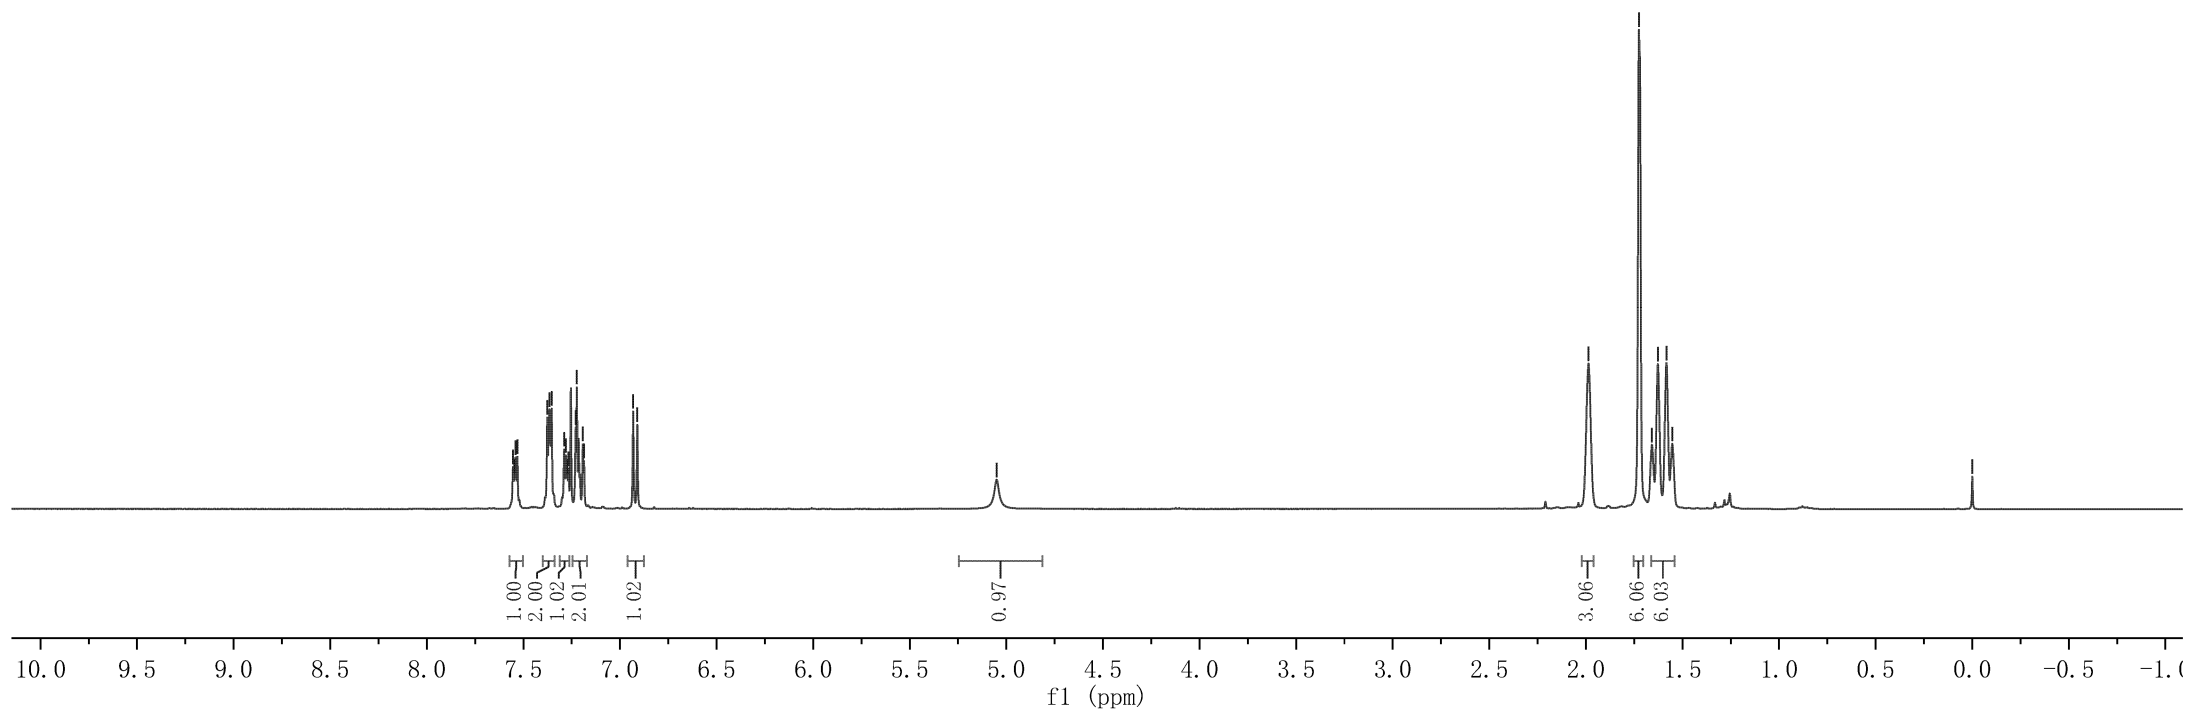



| Parameter                | Value               |
|--------------------------|---------------------|
| 1 Title                  | fxv-7-165           |
| 2 Origin                 |                     |
| 3 Solvent                | CDC13               |
| 4 Temperature            | 297.5               |
| 5 Number of Scans        | 16                  |
| 6 Acquisition Time       | 4.0002              |
| 7 Acquisition Date       | 2022-03-02T10:49:29 |
| 8 Spectrometer Frequency | 399.93              |
| 9 Spectral Width         | 8012.0              |

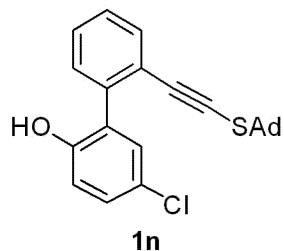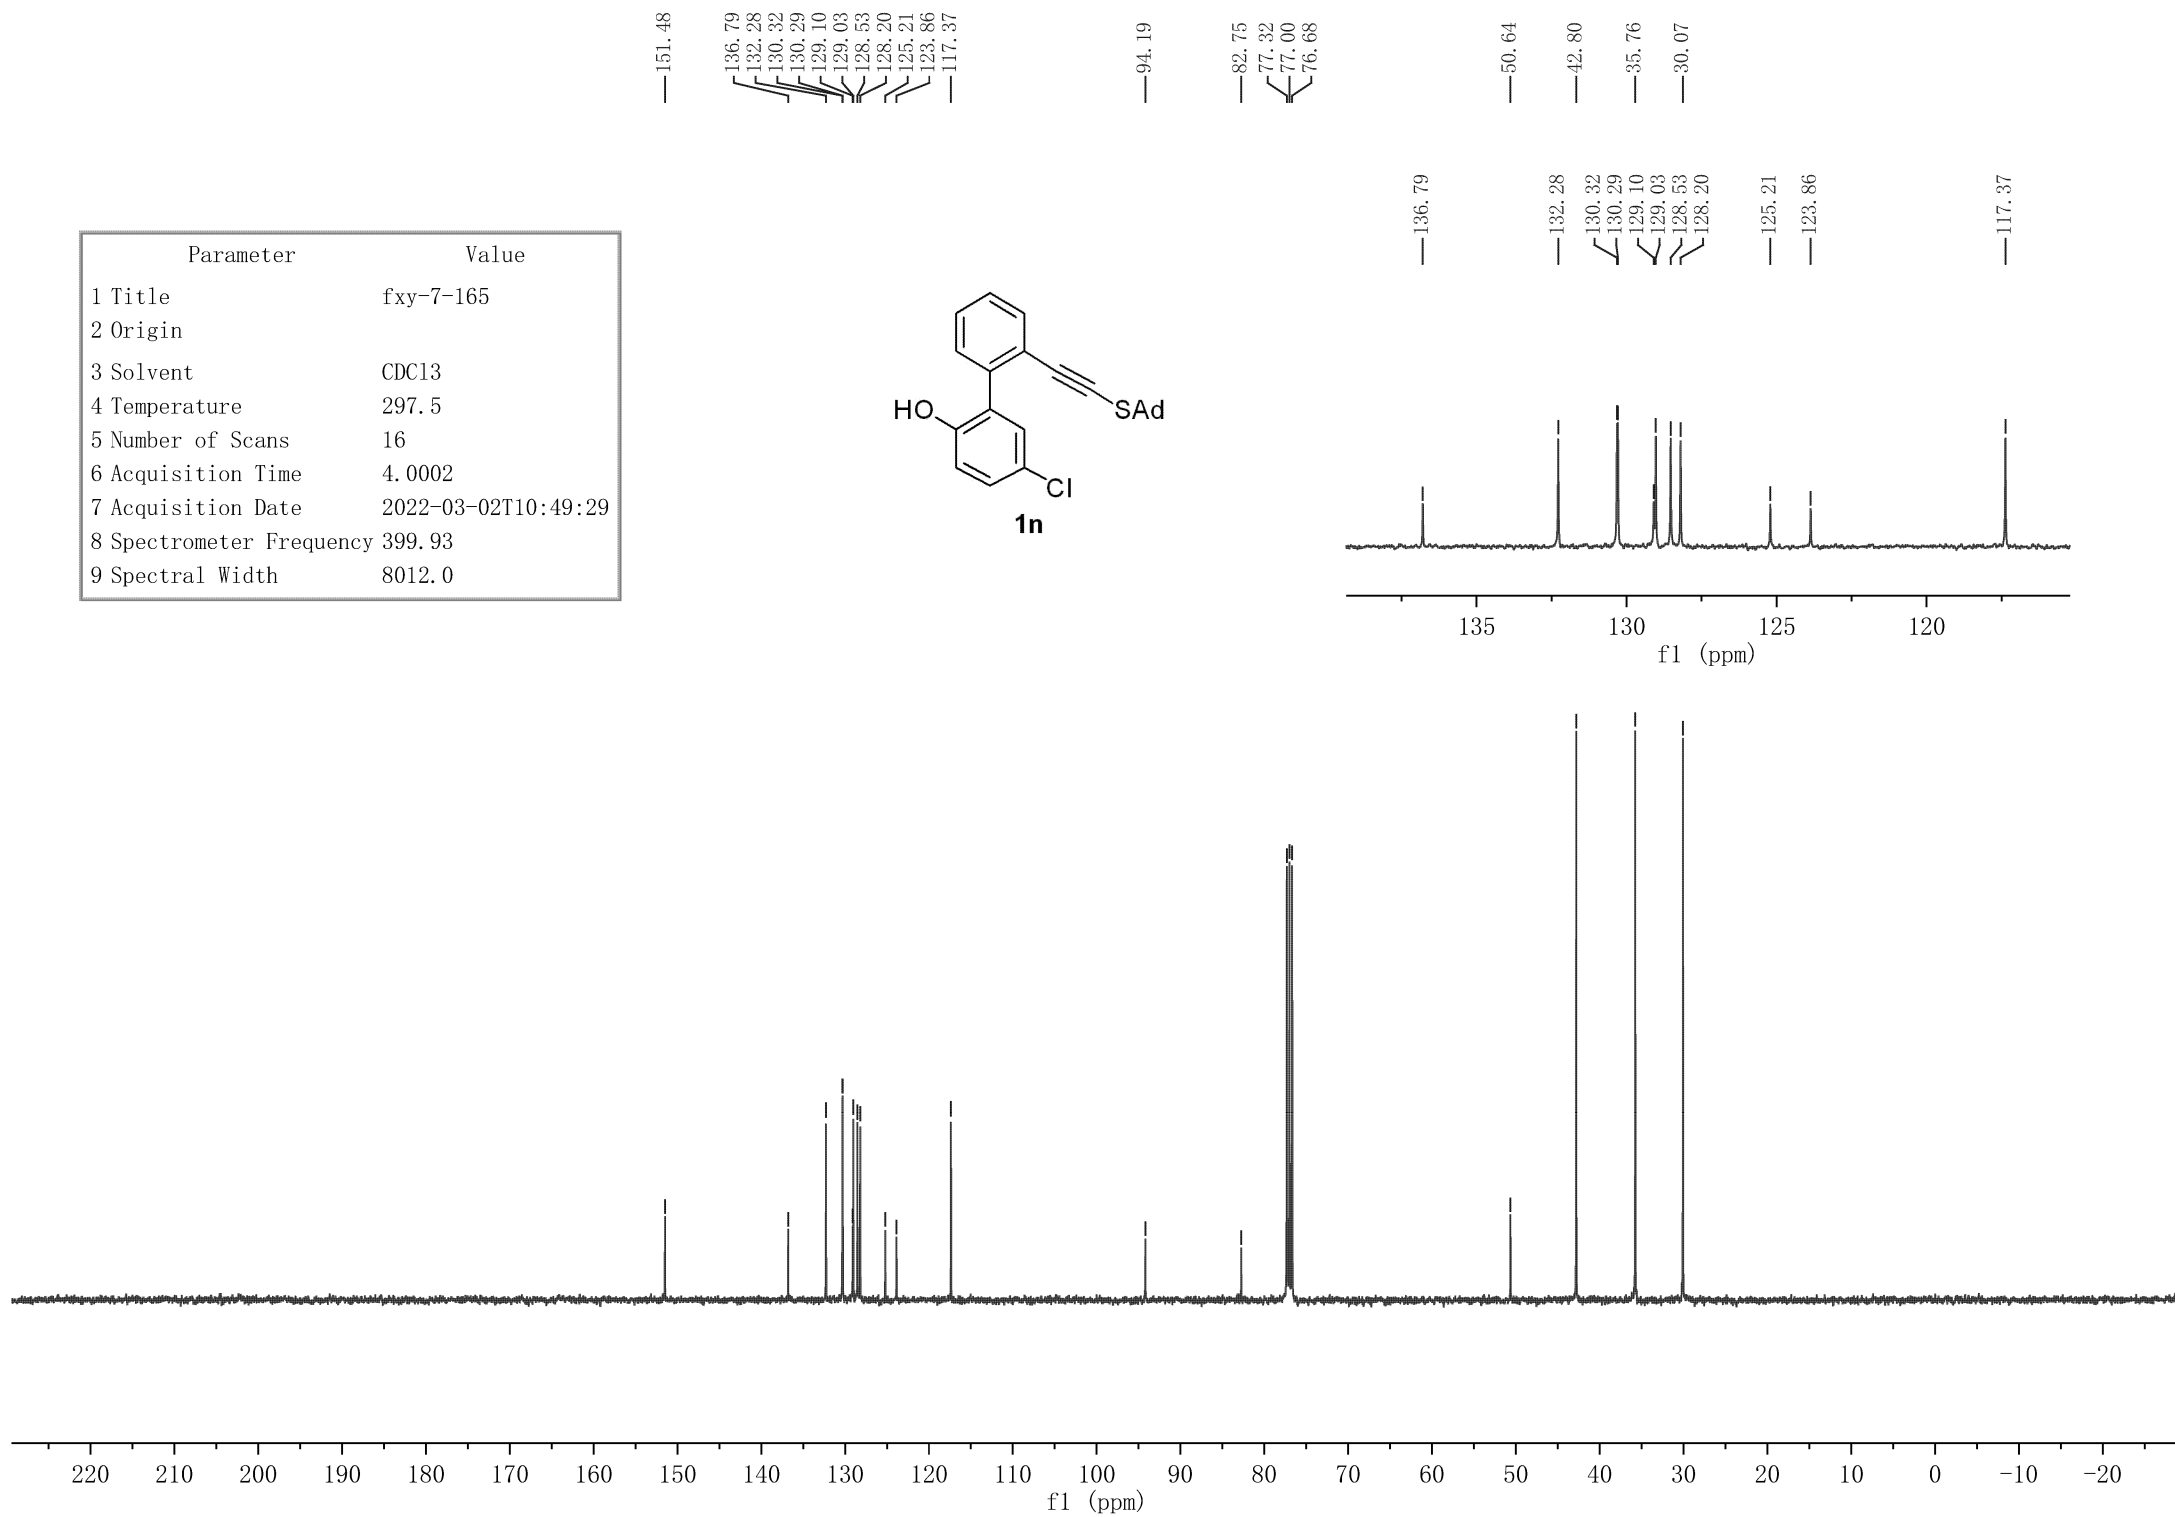

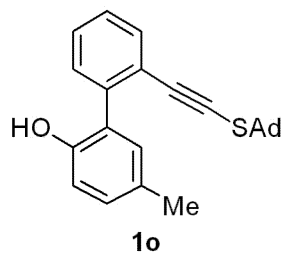

| Parameter                | Value               |
|--------------------------|---------------------|
| 1 Title                  | 1o                  |
| 2 Origin                 |                     |
| 3 Solvent                | CDC13               |
| 4 Temperature            | 297.5               |
| 5 Number of Scans        | 16                  |
| 6 Acquisition Time       | 4.0002              |
| 7 Acquisition Date       | 2022-03-02T11:09:48 |
| 8 Spectrometer Frequency | 399.93              |
| 9 Spectral Width         | 8012.0              |

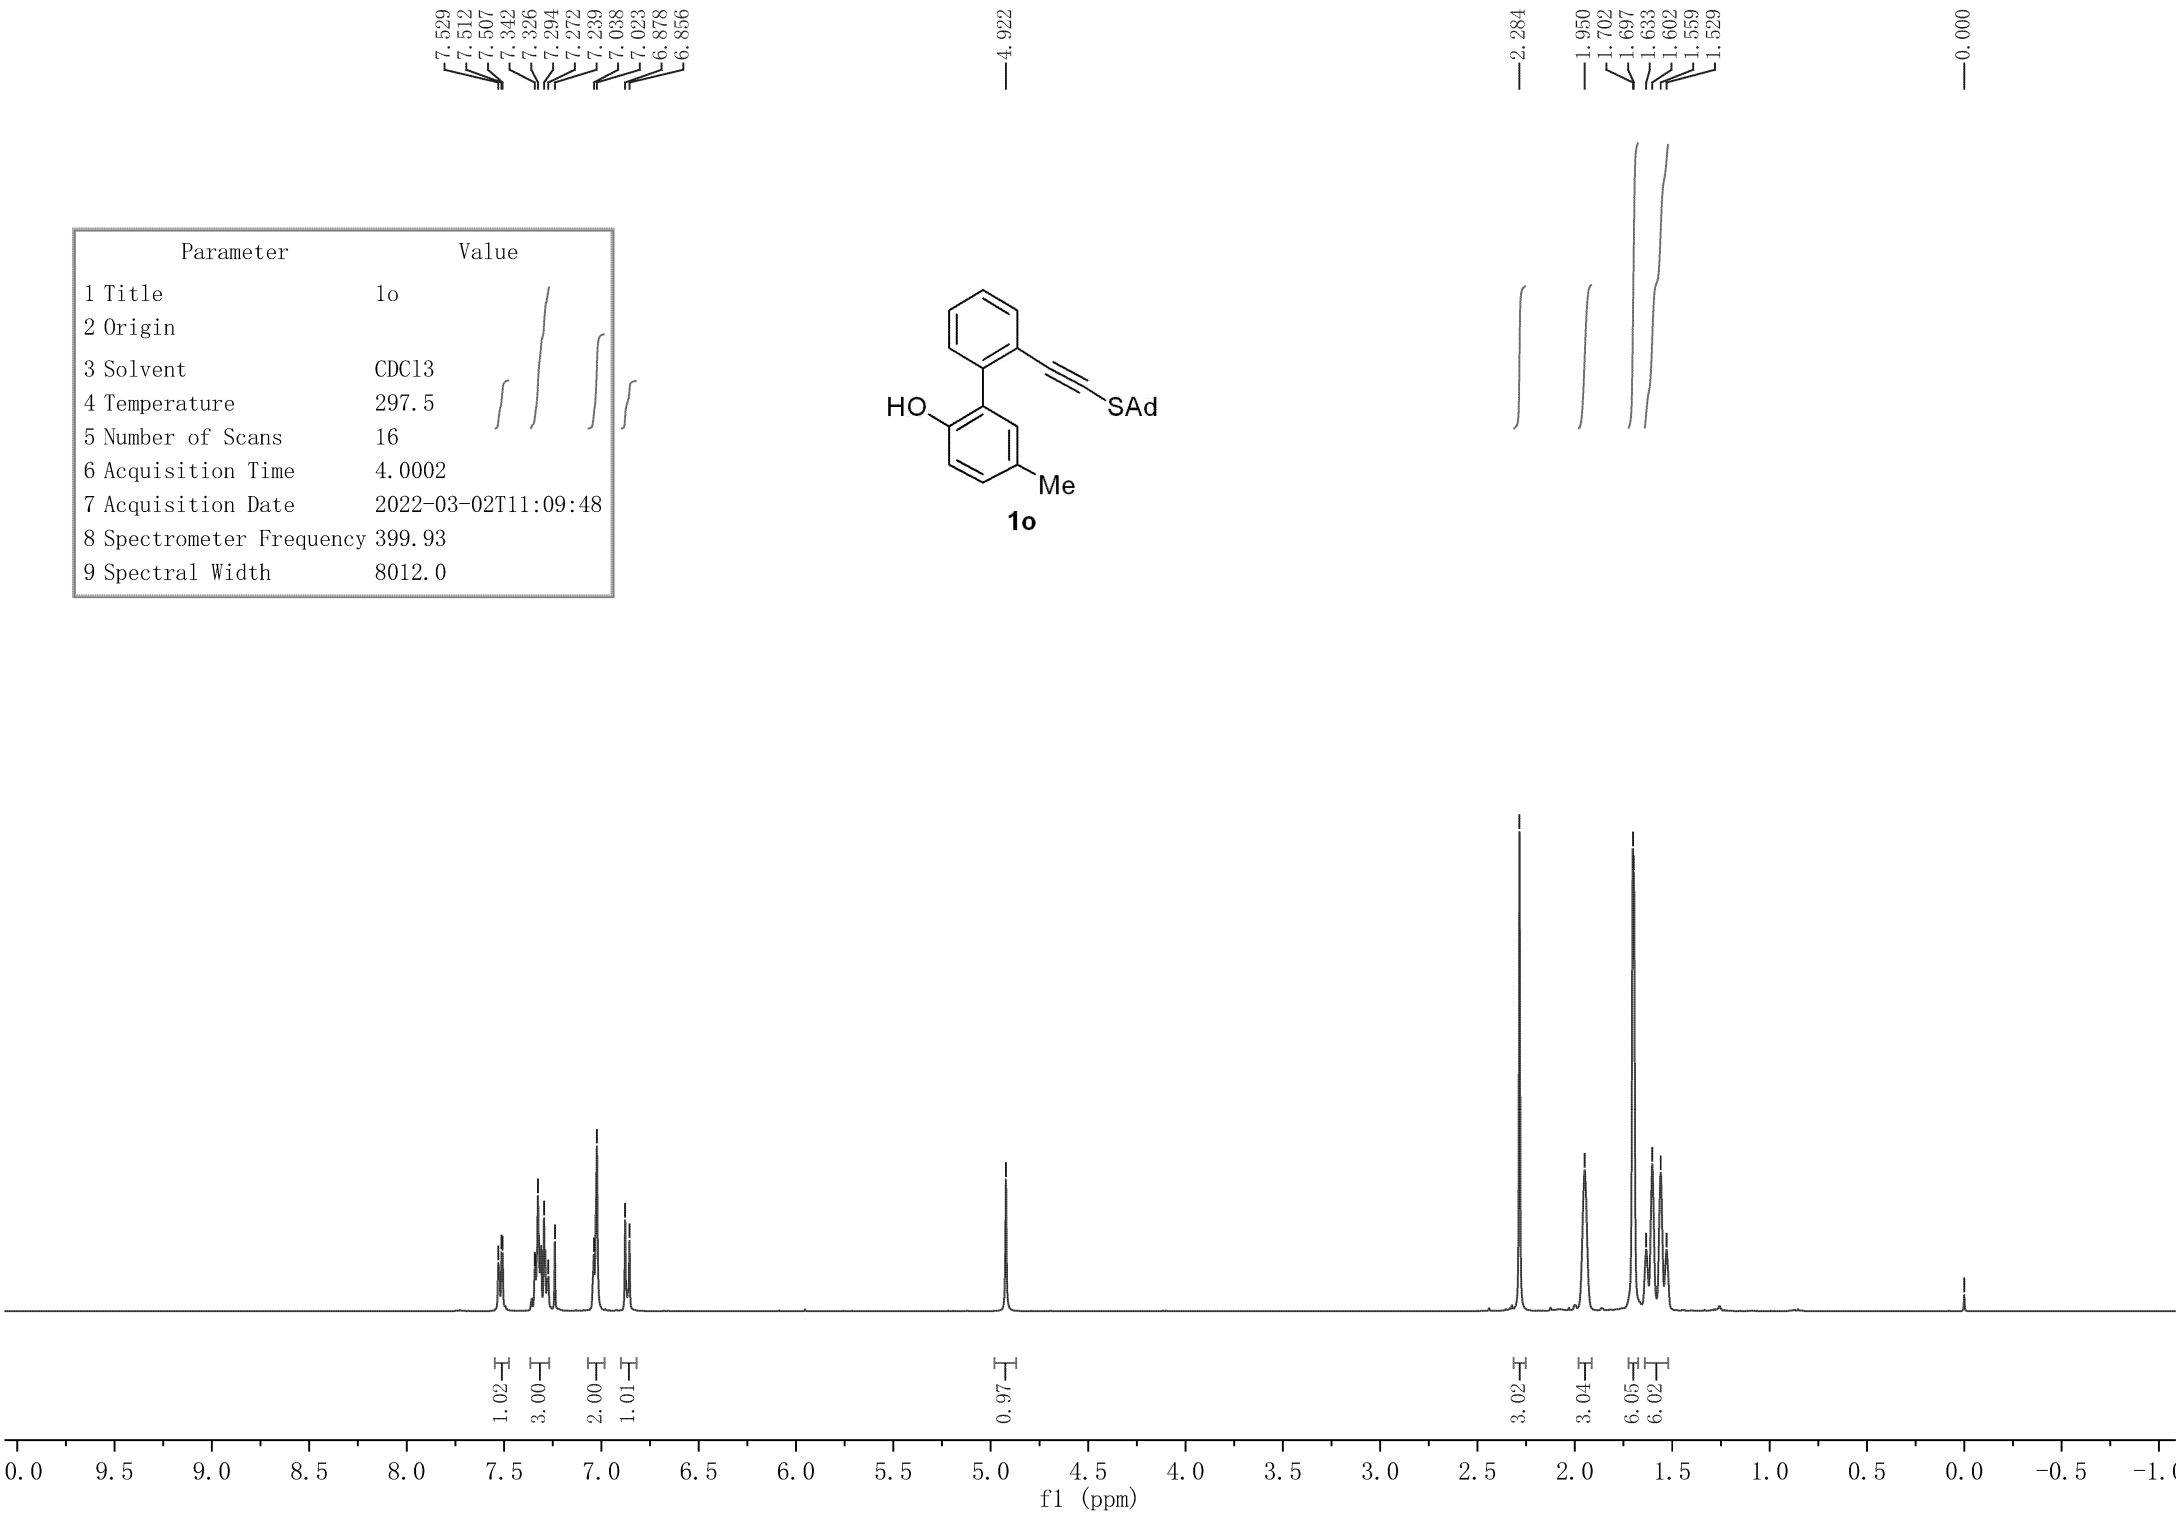

| Parameter                | Value               |
|--------------------------|---------------------|
| 1 Title                  | 1o                  |
| 2 Origin                 |                     |
| 3 Solvent                | CDC13               |
| 4 Temperature            | 297.8               |
| 5 Number of Scans        | 200                 |
| 6 Acquisition Time       | 1.0000              |
| 7 Acquisition Date       | 2022-03-02T11:18:51 |
| 8 Spectrometer Frequency | 100.56              |
| 9 Spectral Width         | 26041.0             |

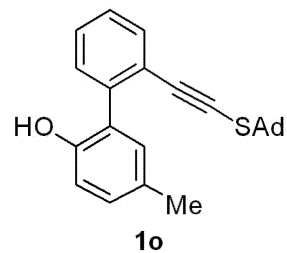

150.46  
 138.46  
 132.00  
 131.03  
 130.49  
 129.69  
 129.47  
 127.99  
 127.85  
 115.85  
 94.70  
 81.83  
 77.32  
 77.00  
 76.68  
 50.45  
 42.66  
 35.70  
 30.03  
 20.44

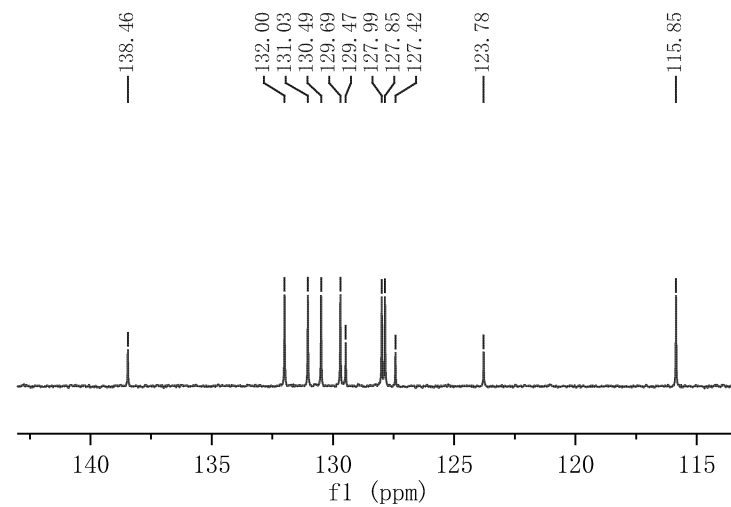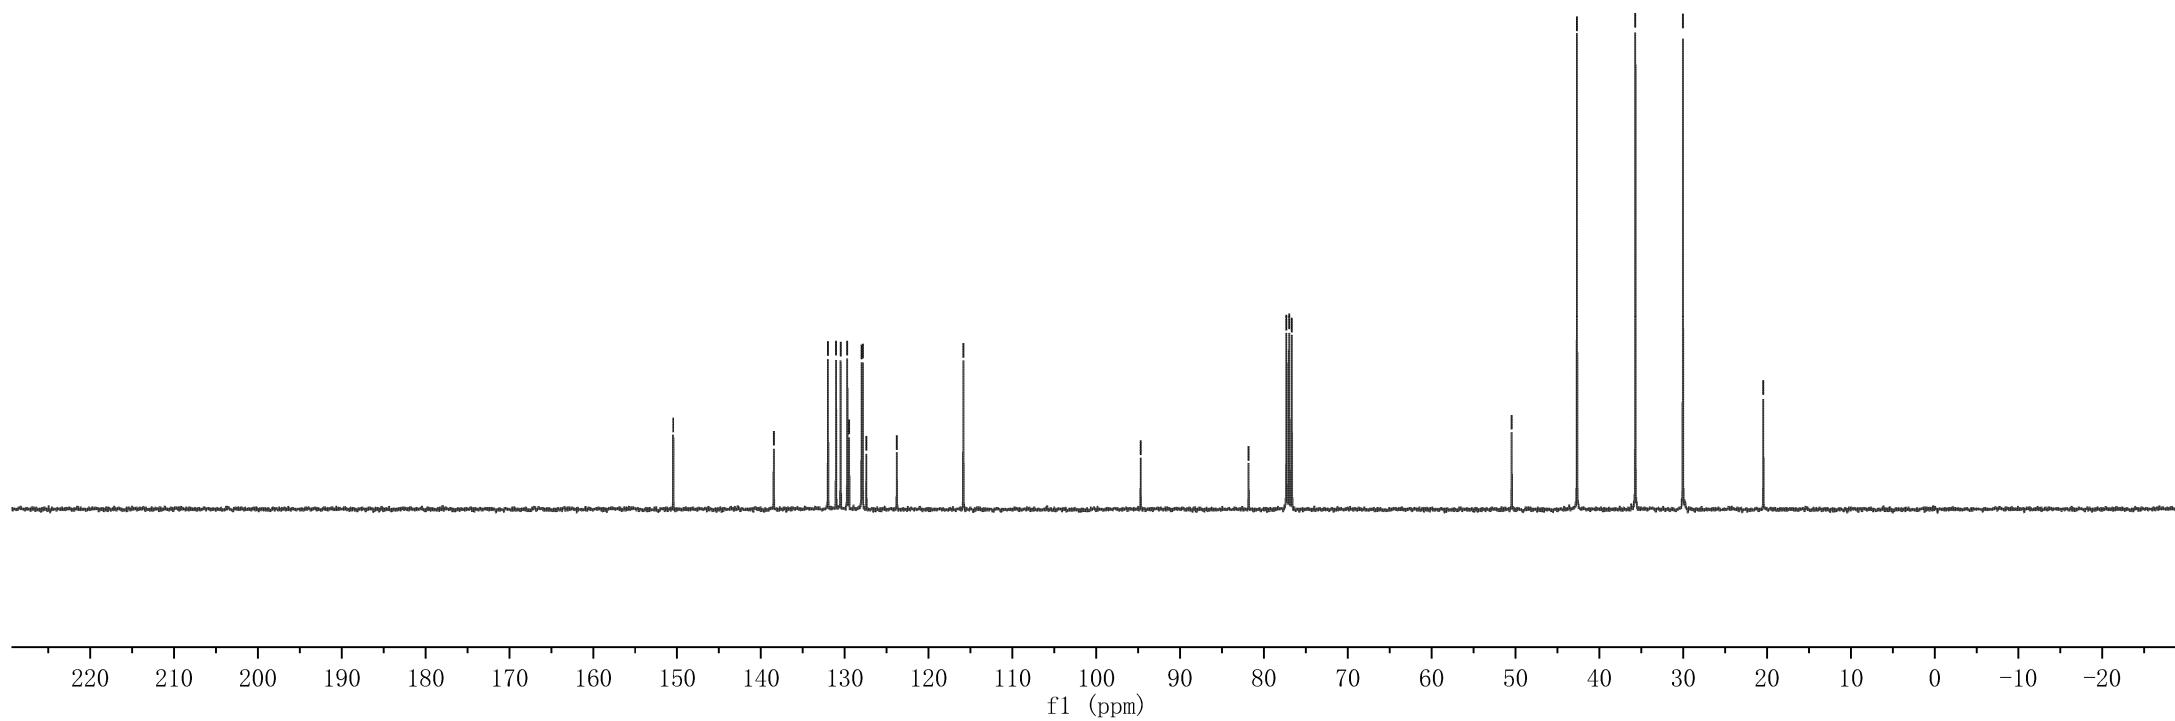

| Parameter                | Value               |
|--------------------------|---------------------|
| 1 Title                  | fxv-8-137-H         |
| 2 Origin                 |                     |
| 3 Solvent                | CDC13               |
| 4 Temperature            | 299.5               |
| 5 Number of Scans        | 16                  |
| 6 Acquisition Time       | 4.0002              |
| 7 Acquisition Date       | 2022-05-26T20:06:19 |
| 8 Spectrometer Frequency | 399.92              |
| 9 Spectral Width         | 8012.0              |

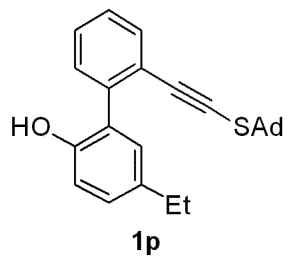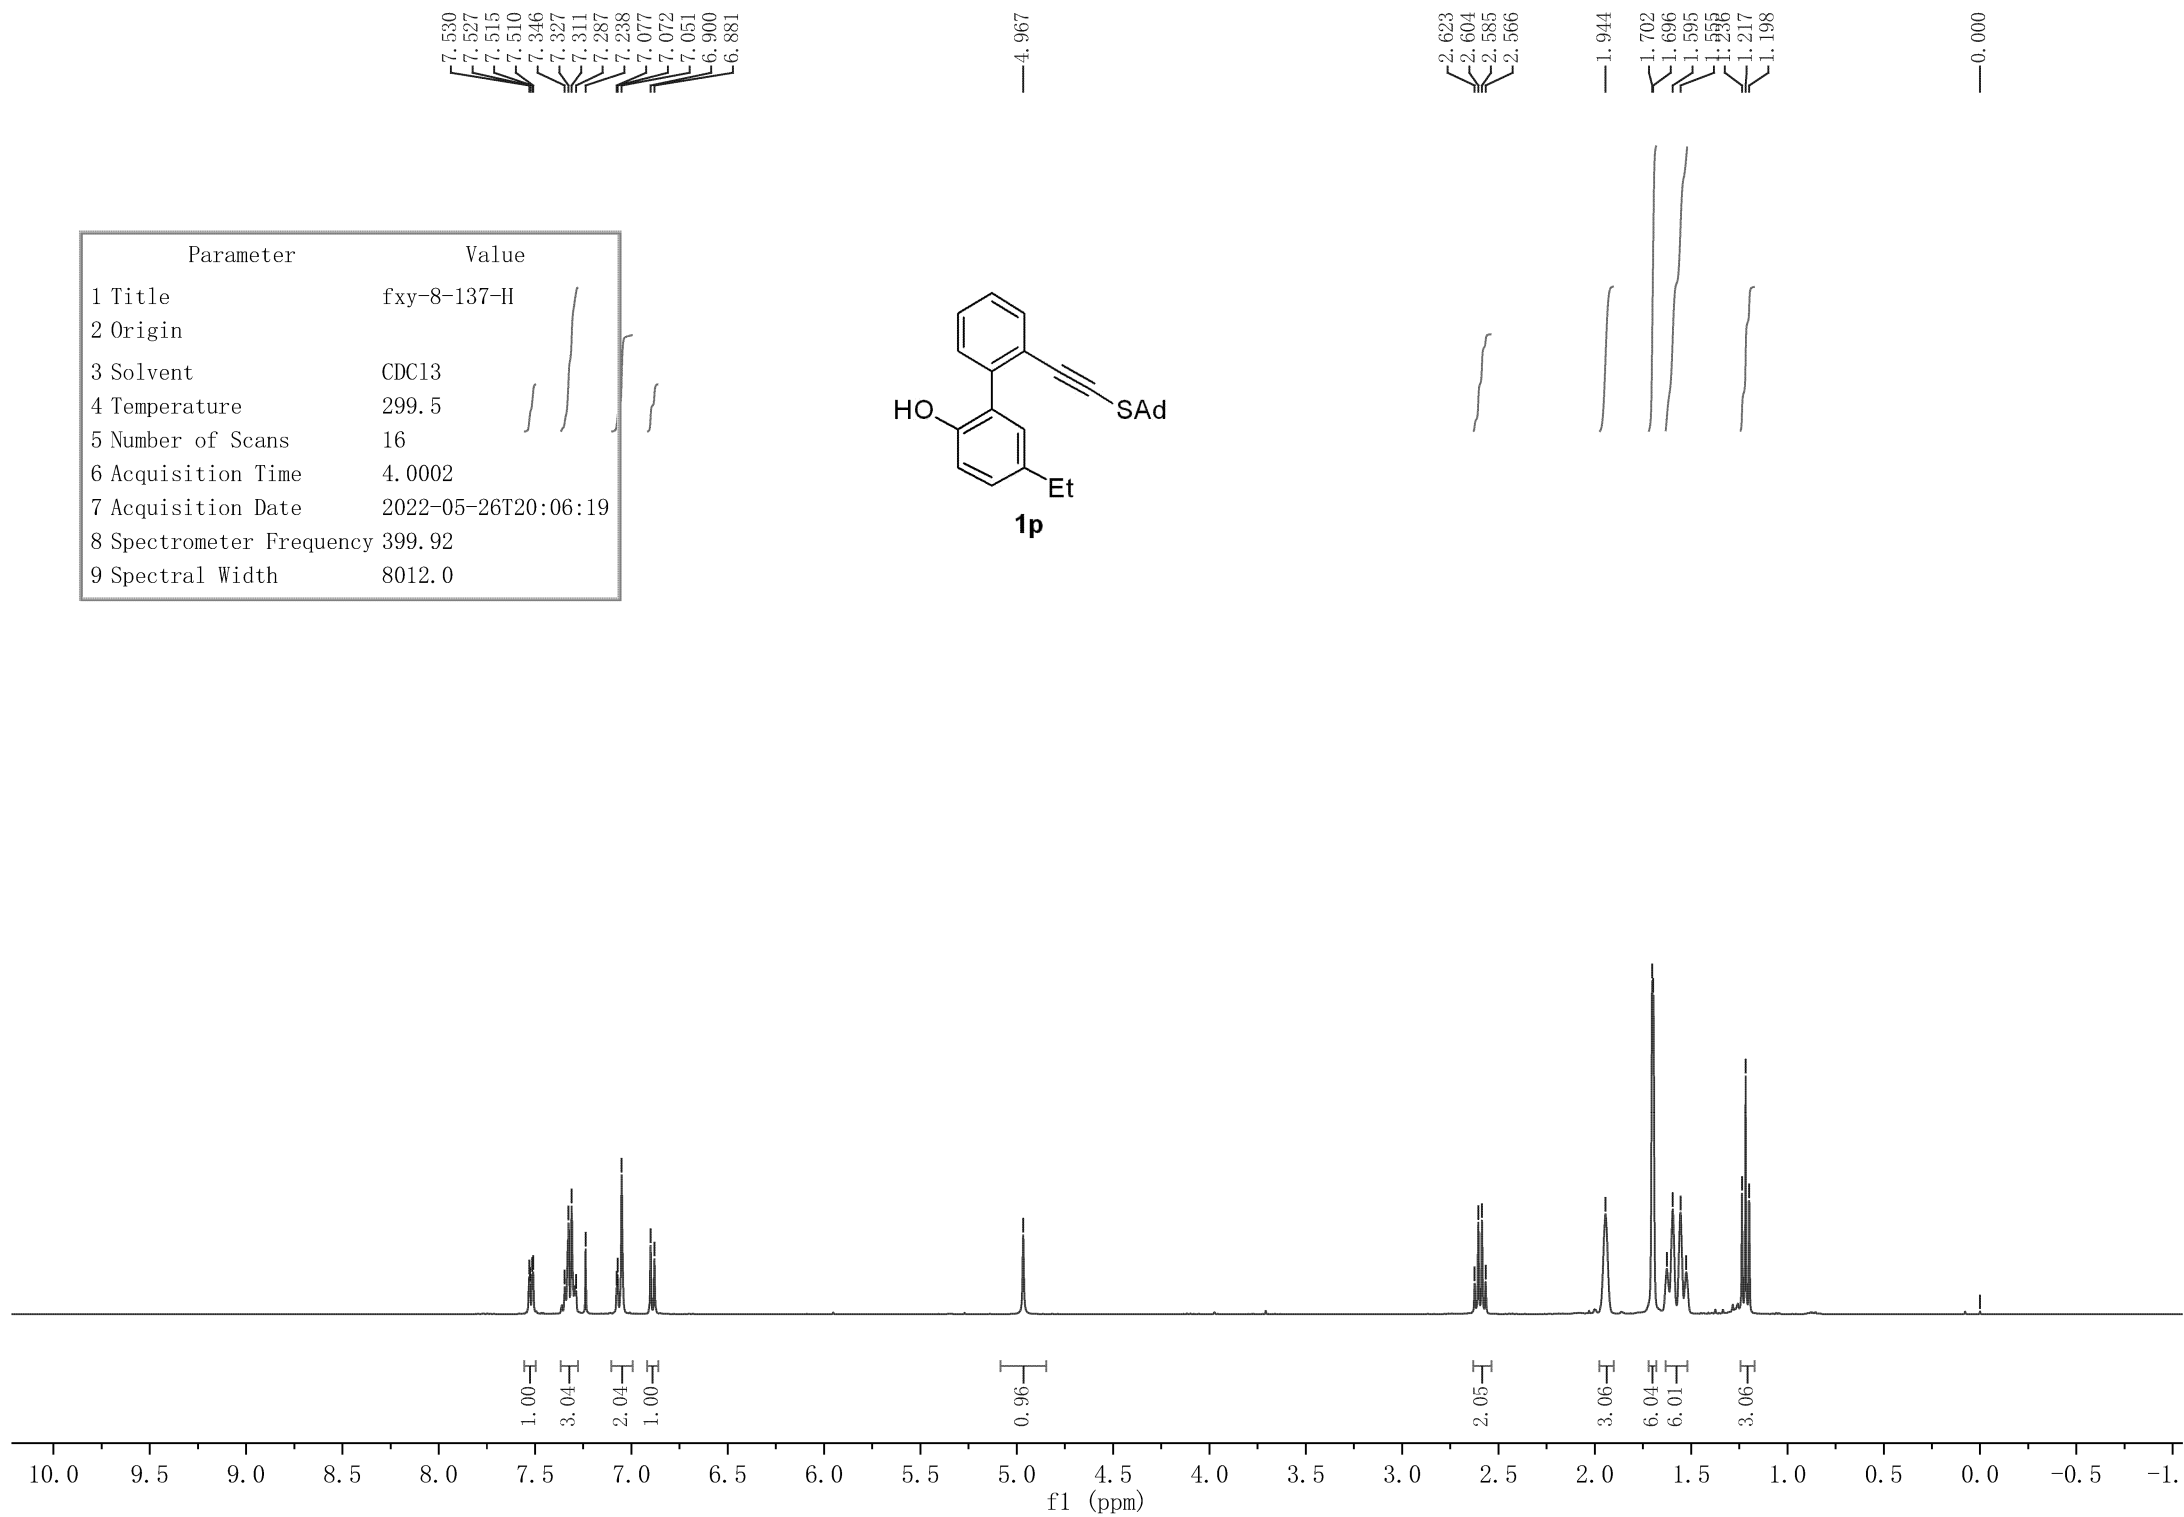

| Parameter                | Value               |
|--------------------------|---------------------|
| 1 Title                  | fxv-8-137-C         |
| 2 Origin                 |                     |
| 3 Solvent                | CDC13               |
| 4 Temperature            | 299.2               |
| 5 Number of Scans        | 400                 |
| 6 Acquisition Time       | 1.0000              |
| 7 Acquisition Date       | 2022-05-26T20:21:58 |
| 8 Spectrometer Frequency | 100.56              |
| 9 Spectral Width         | 26041.0             |

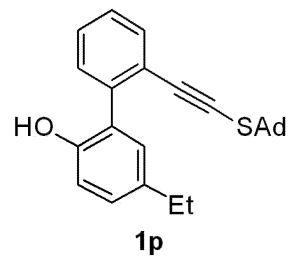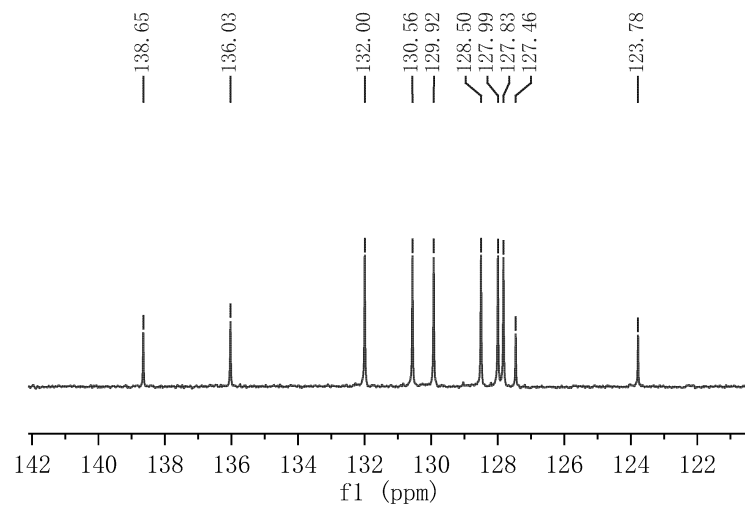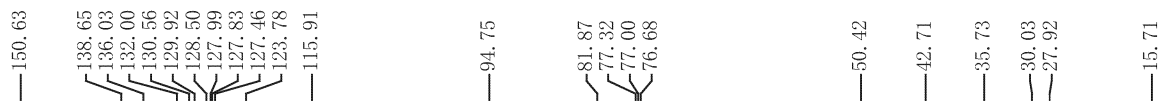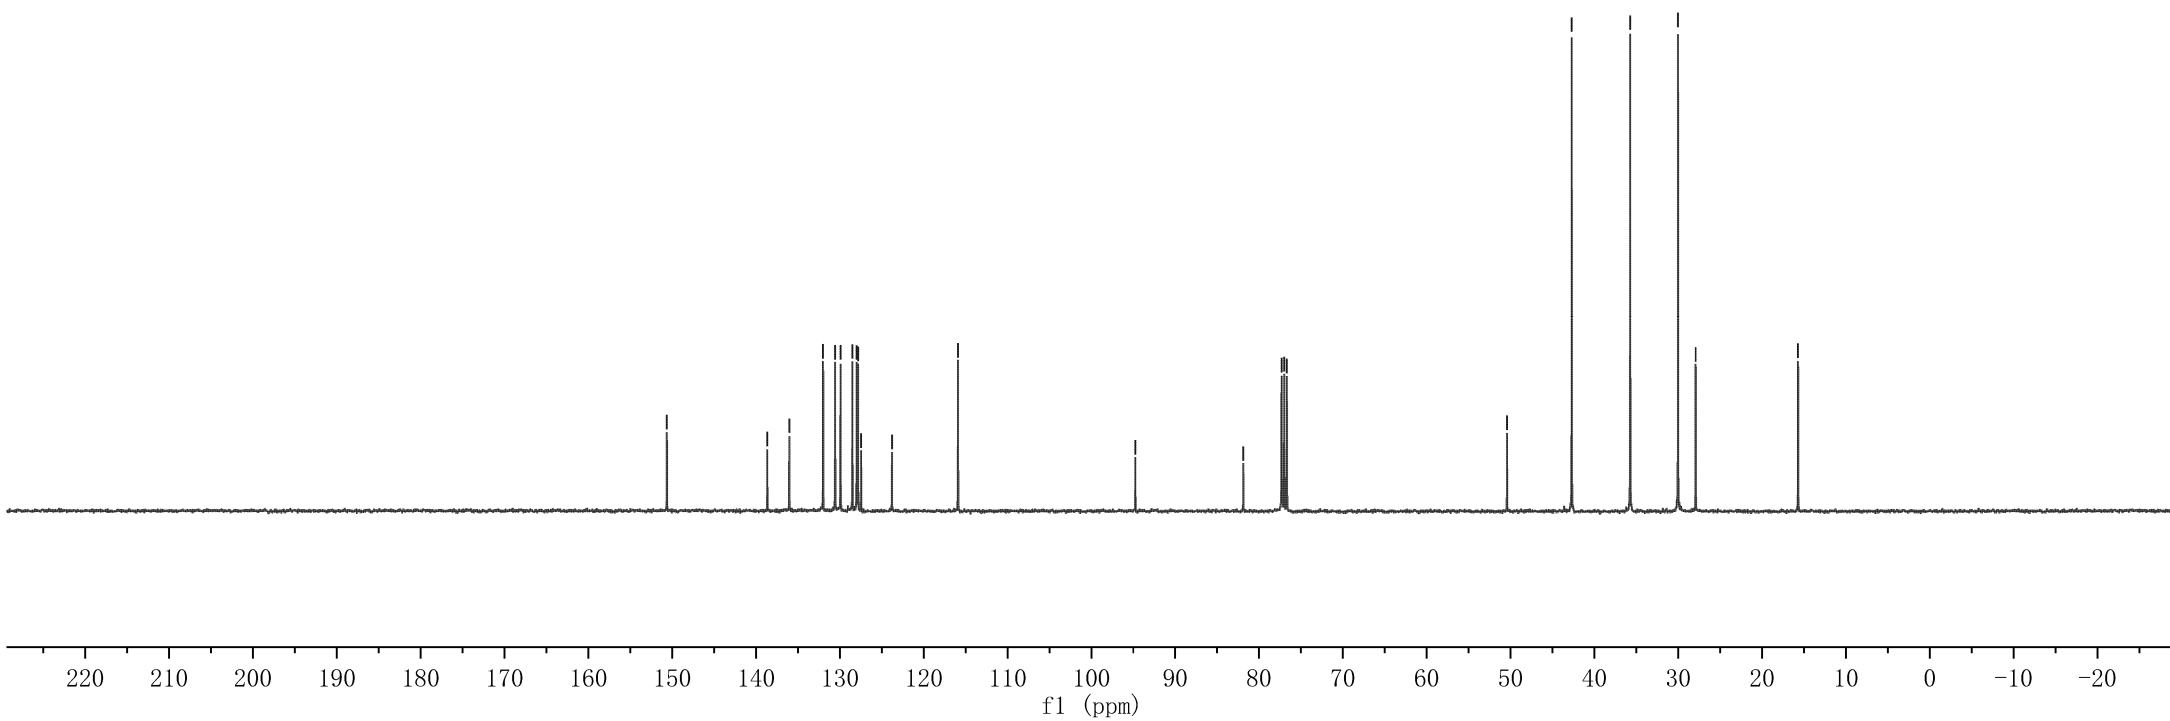

7.544  
7.538  
7.531  
7.521  
7.369  
7.357  
7.346  
7.275  
7.265  
7.167  
7.147  
7.009  
7.005  
6.975  
6.971  
6.955  
6.950

5.187

2.003  
1.717  
1.714  
1.672  
1.641  
1.581  
1.550

0.000

| Parameter                | Value               |
|--------------------------|---------------------|
| 1 Title                  | 1t                  |
| 2 Origin                 |                     |
| 3 Solvent                | CDC13               |
| 4 Temperature            | 295.6               |
| 5 Number of Scans        | 16                  |
| 6 Acquisition Time       | 4.0002              |
| 7 Acquisition Date       | 2022-04-19T19:00:40 |
| 8 Spectrometer Frequency | 399.93              |
| 9 Spectral Width         | 8012.0              |

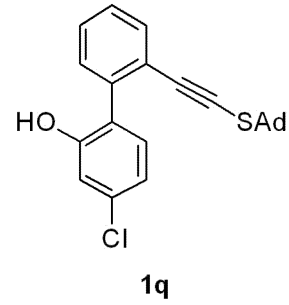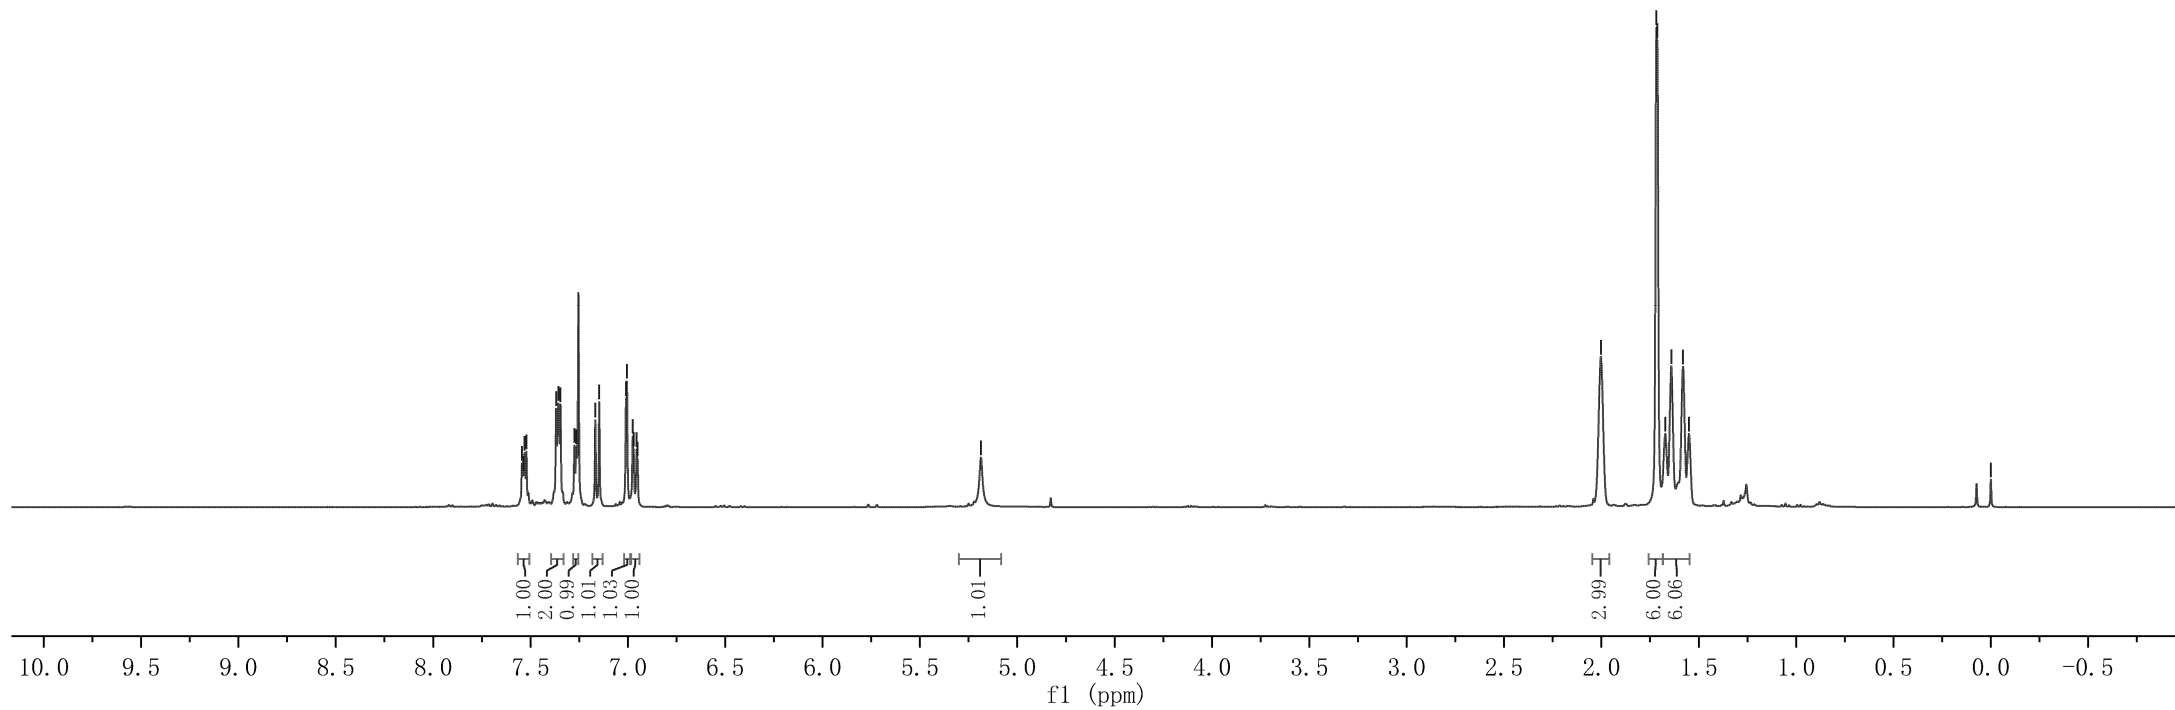

| Parameter                | Value               |
|--------------------------|---------------------|
| 1 Title                  | 1t                  |
| 2 Origin                 |                     |
| 3 Solvent                | CDC13               |
| 4 Temperature            | 295.9               |
| 5 Number of Scans        | 400                 |
| 6 Acquisition Time       | 1.0000              |
| 7 Acquisition Date       | 2022-04-19T19:16:10 |
| 8 Spectrometer Frequency | 100.56              |
| 9 Spectral Width         | 26041.0             |

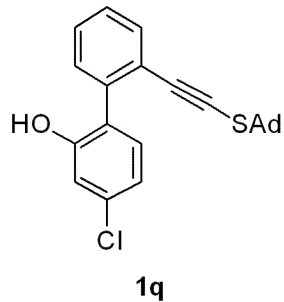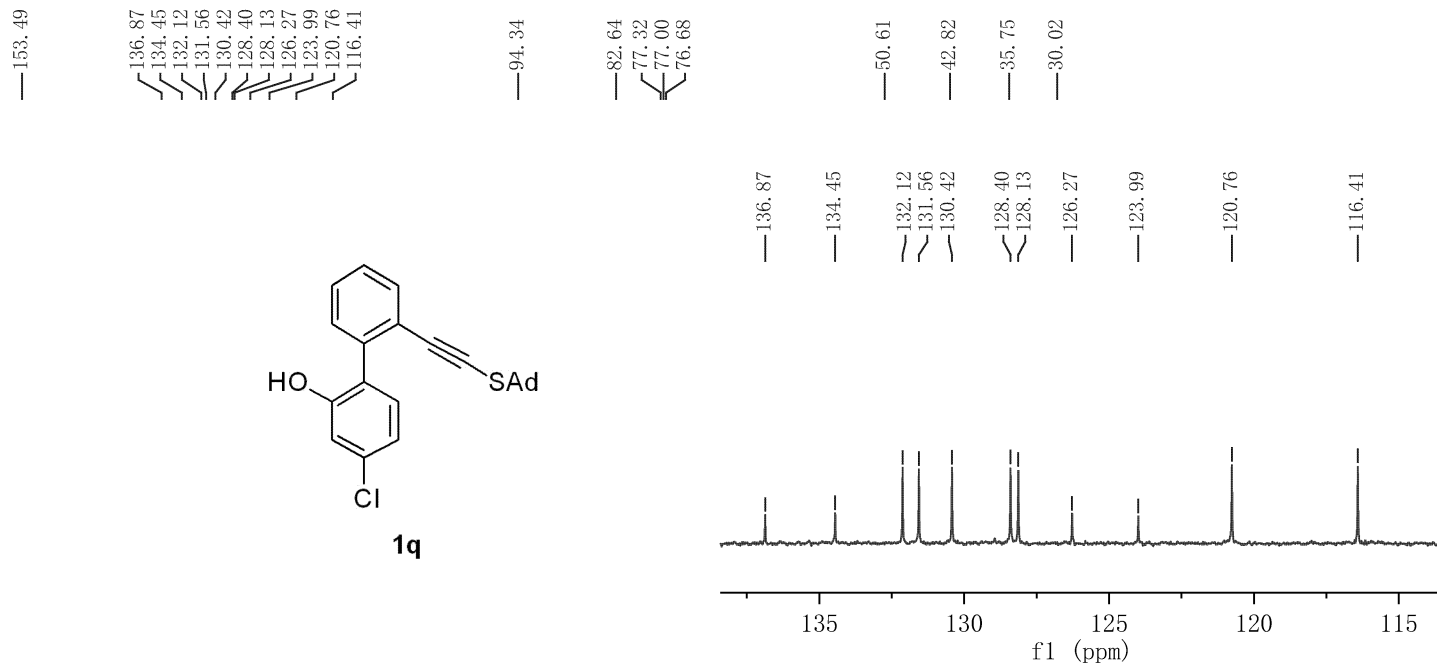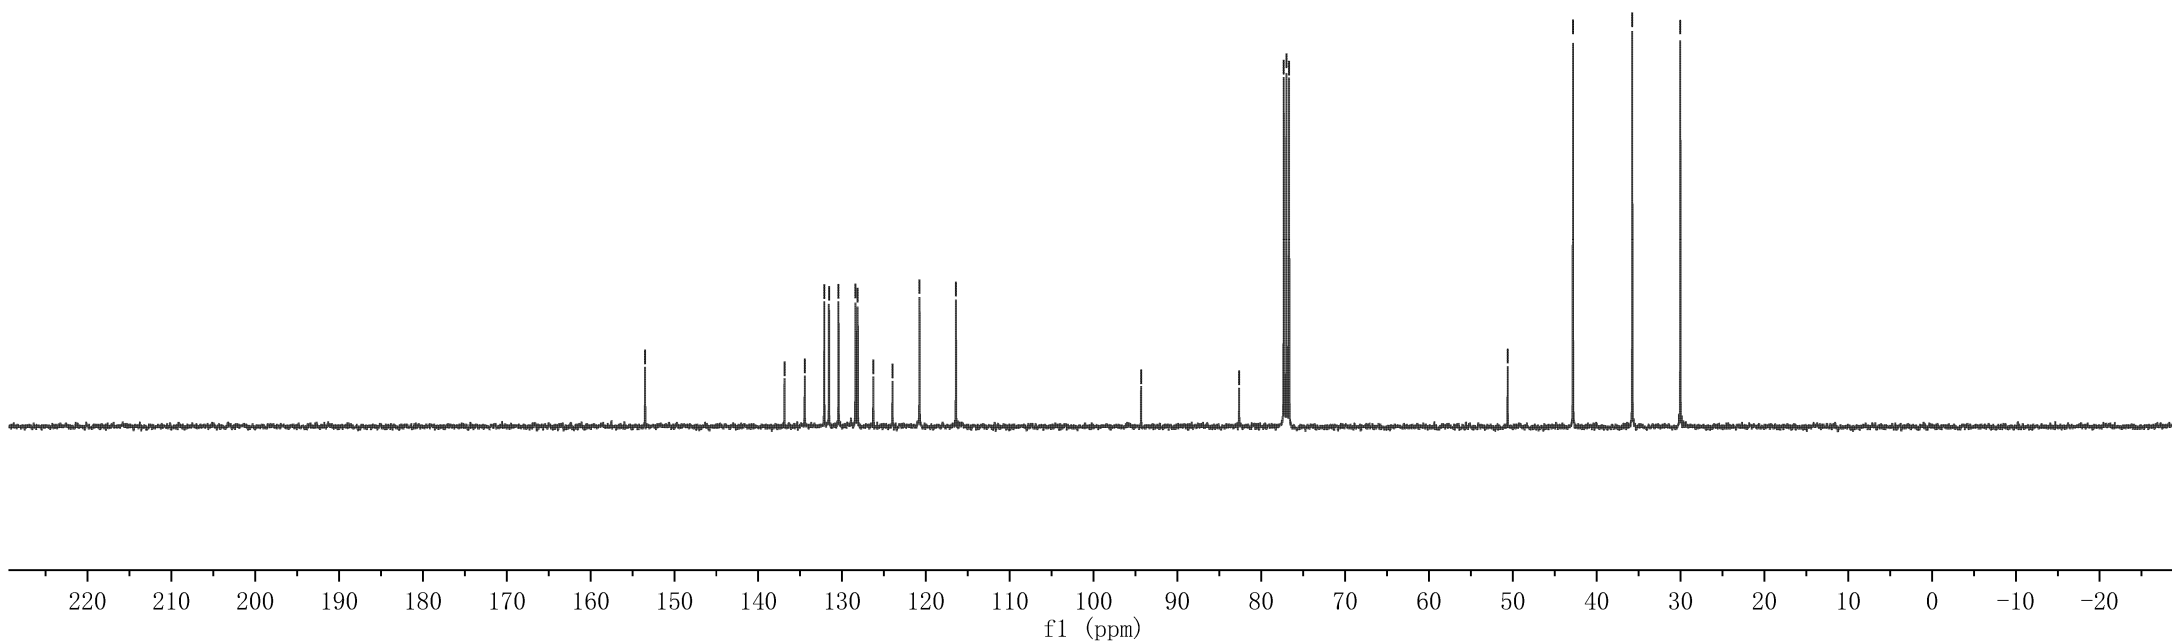

| Parameter                | Value               |
|--------------------------|---------------------|
| 1 Title                  | 1r                  |
| 2 Origin                 |                     |
| 3 Solvent                | CDC13               |
| 4 Temperature            | 297.2               |
| 5 Number of Scans        | 16                  |
| 6 Acquisition Time       | 4.0002              |
| 7 Acquisition Date       | 2022-03-28T18:14:18 |
| 8 Spectrometer Frequency | 399.93              |
| 9 Spectral Width         | 8012.0              |

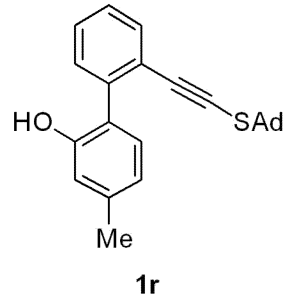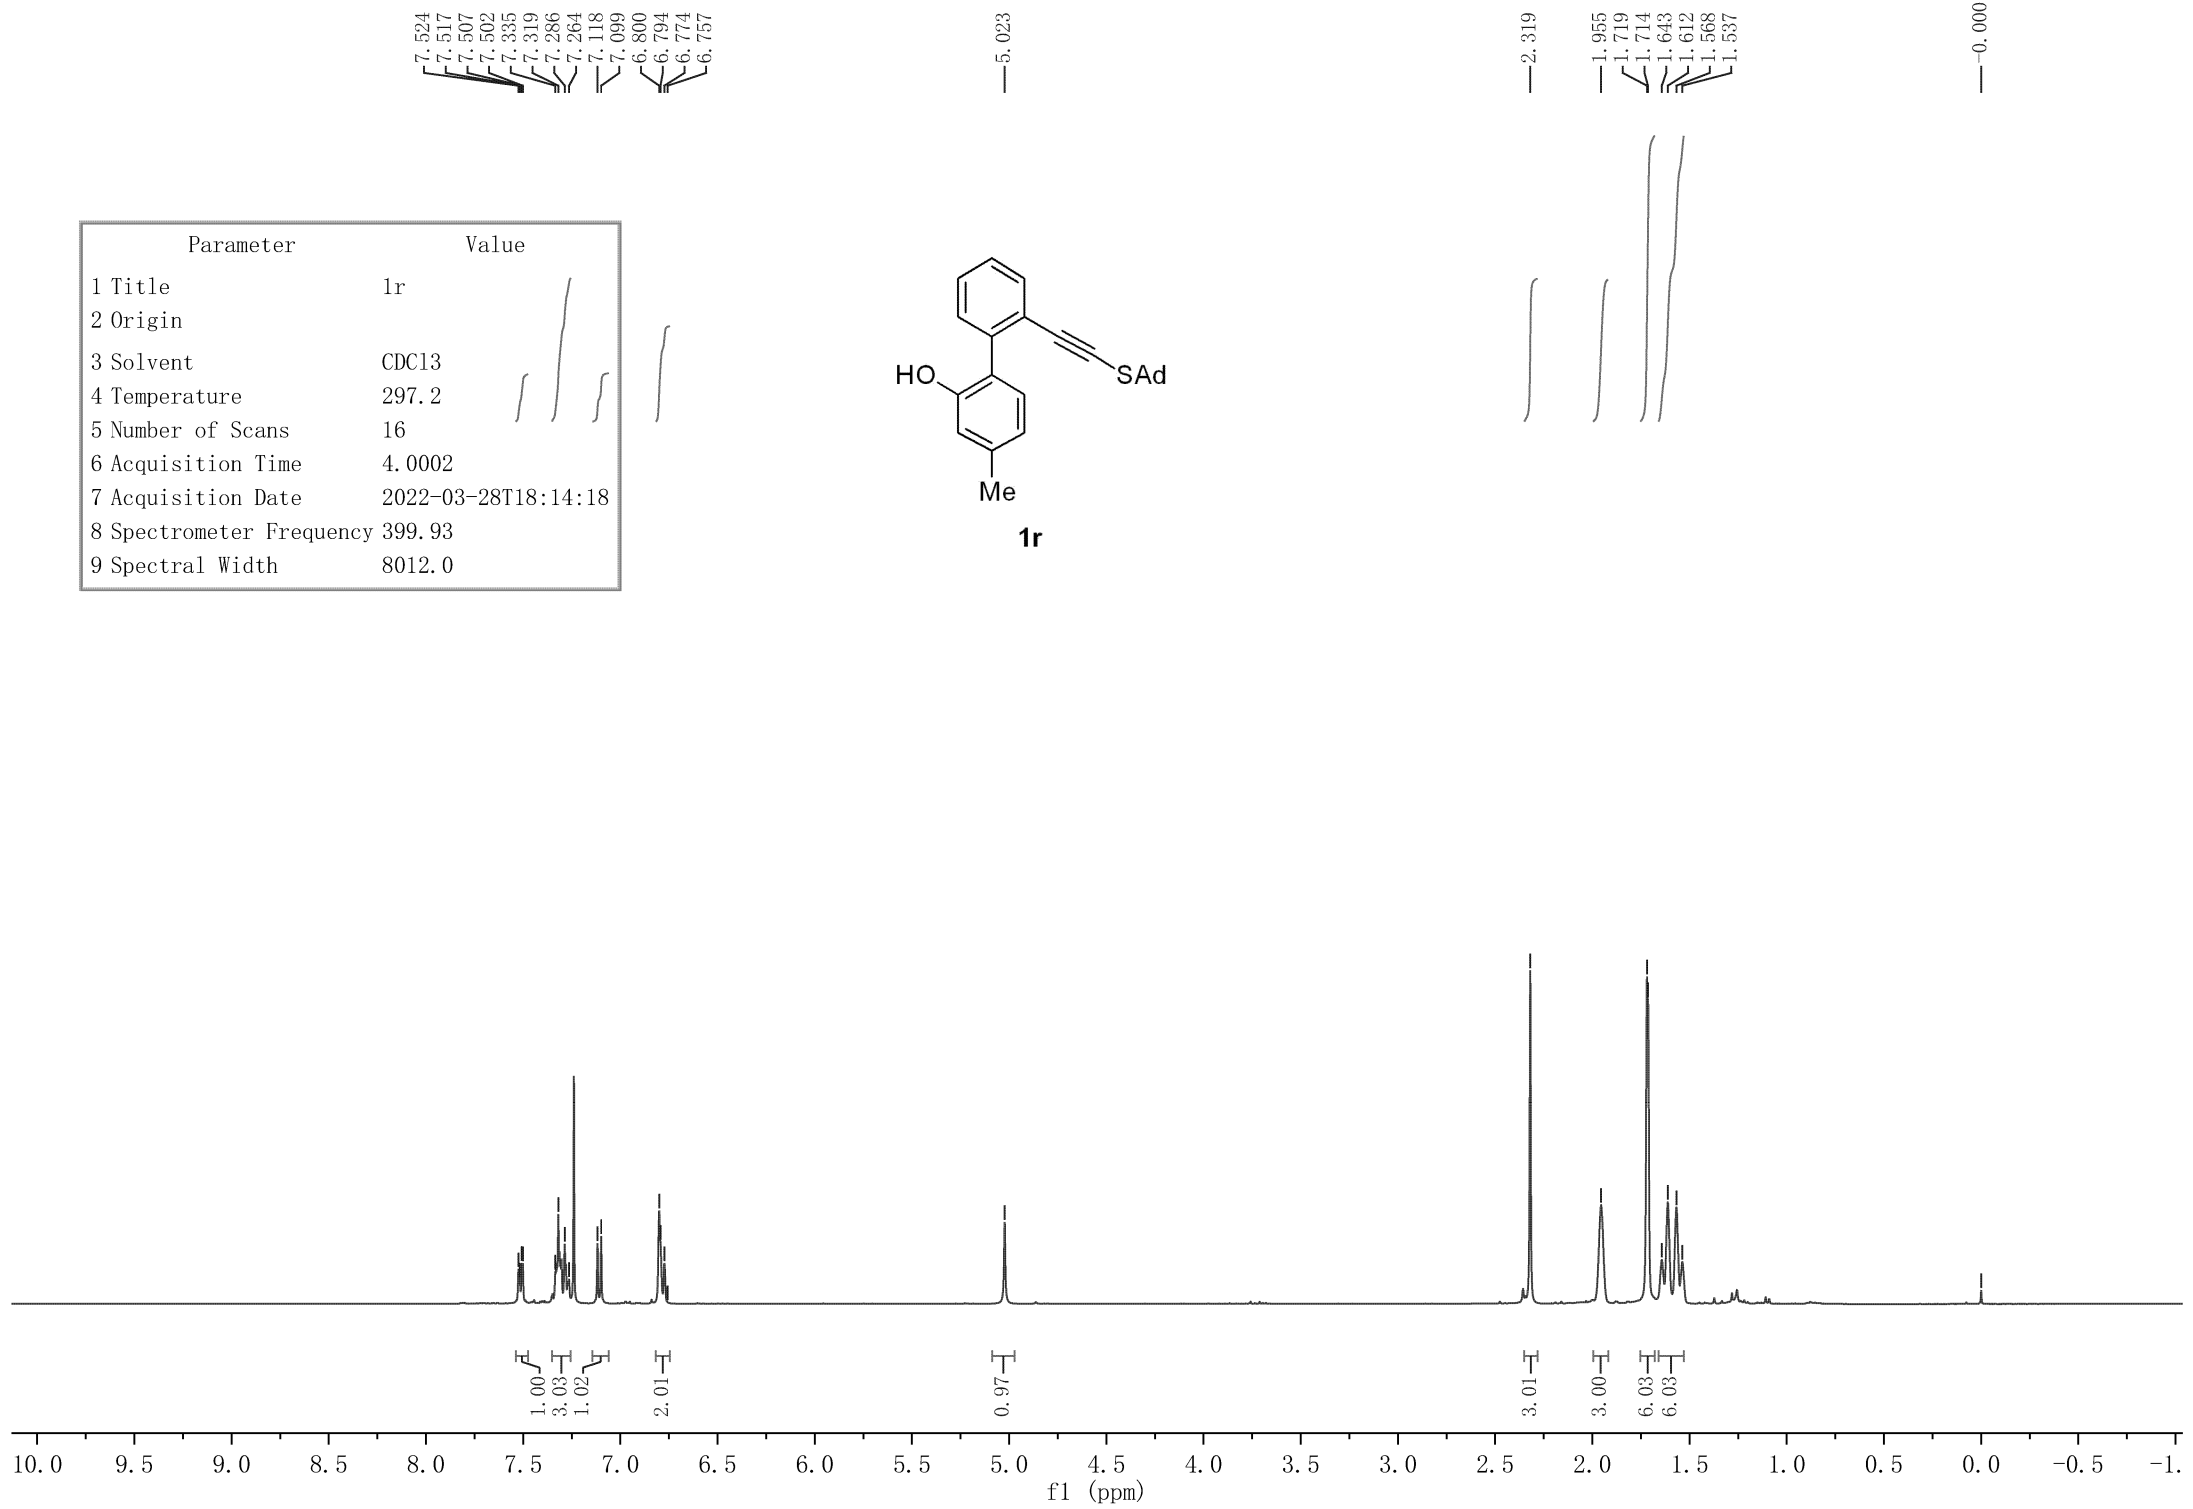



| Parameter                | Value               |
|--------------------------|---------------------|
| 1 Title                  | 1r                  |
| 2 Origin                 |                     |
| 3 Solvent                | CDC13               |
| 4 Temperature            | 297.1               |
| 5 Number of Scans        | 300                 |
| 6 Acquisition Time       | 1.0000              |
| 7 Acquisition Date       | 2022-03-28T18:26:27 |
| 8 Spectrometer Frequency | 100.56              |
| 9 Spectral Width         | 26041.0             |

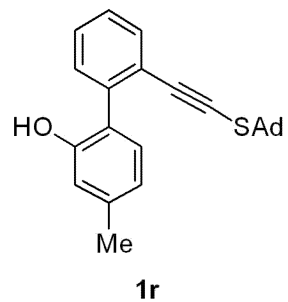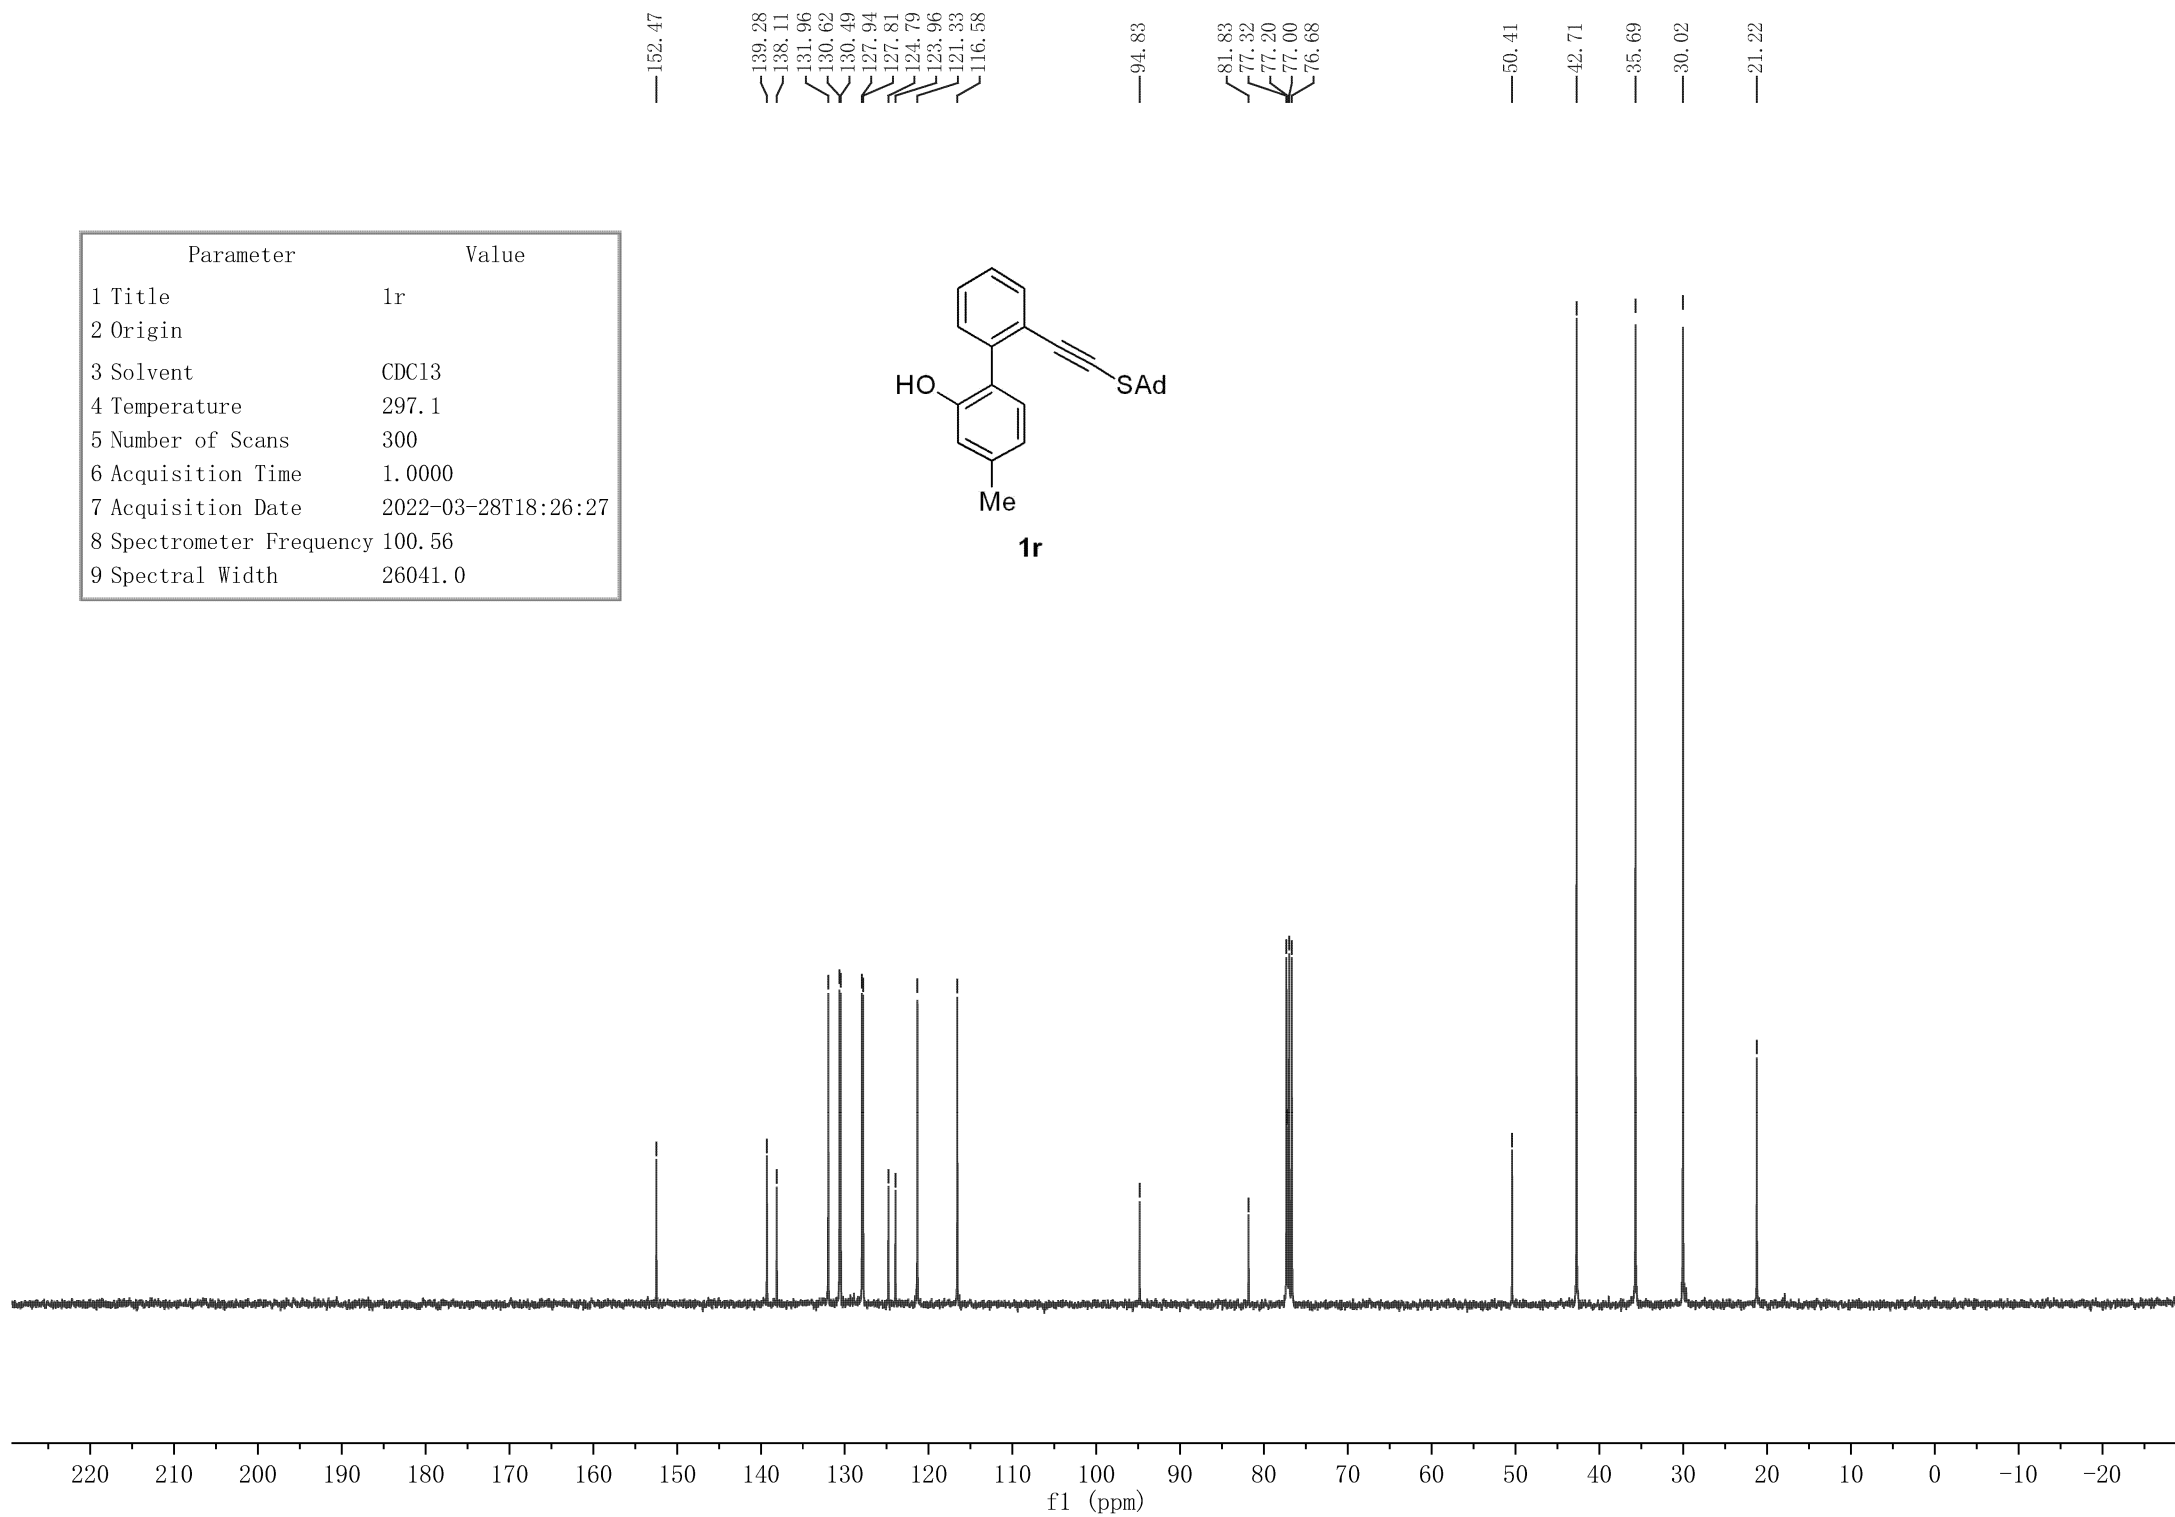

| Parameter                | Value               |
|--------------------------|---------------------|
| 1 Title                  | 1s                  |
| 2 Origin                 |                     |
| 3 Solvent                | CDC13               |
| 4 Temperature            | 297.8               |
| 5 Number of Scans        | 16                  |
| 6 Acquisition Time       | 4.0002              |
| 7 Acquisition Date       | 2022-04-01T18:13:14 |
| 8 Spectrometer Frequency | 399.93              |
| 9 Spectral Width         | 8012.0              |

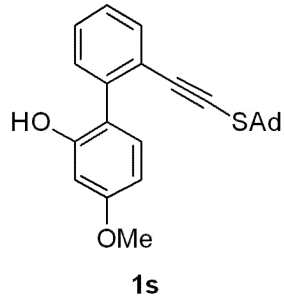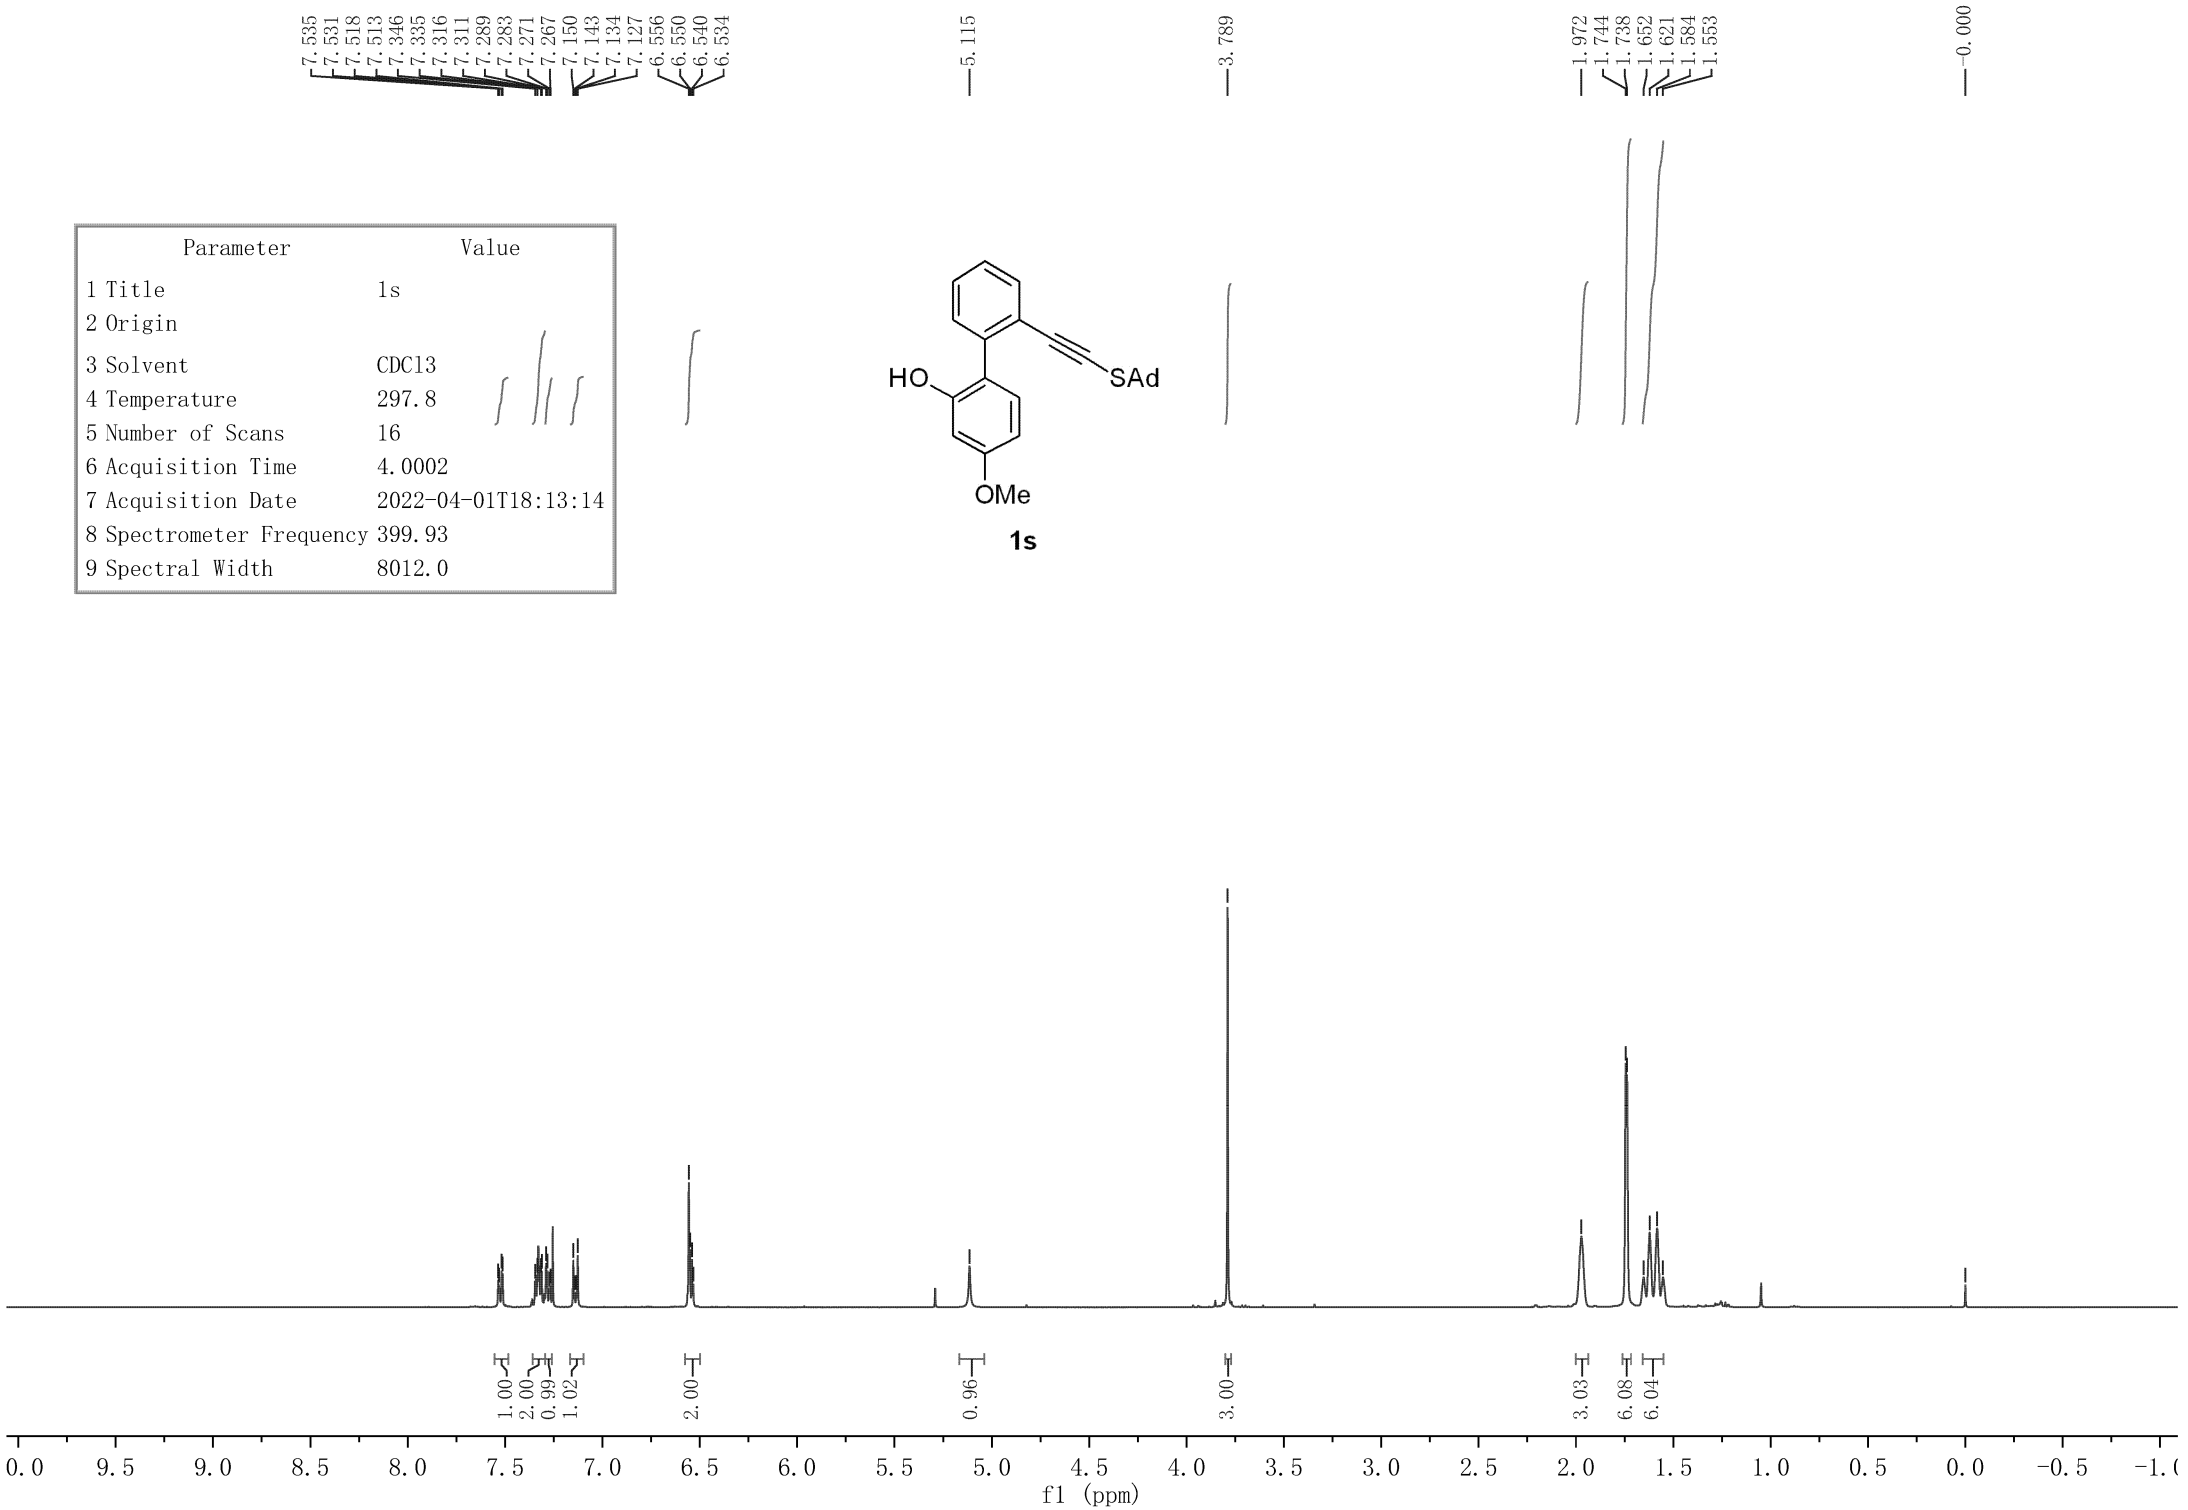

| Parameter                | Value               |
|--------------------------|---------------------|
| 1 Title                  | 1s                  |
| 2 Origin                 |                     |
| 3 Solvent                | CDC13               |
| 4 Temperature            | 297.8               |
| 5 Number of Scans        | 600                 |
| 6 Acquisition Time       | 1.0000              |
| 7 Acquisition Date       | 2022-04-01T18:35:36 |
| 8 Spectrometer Frequency | 100.56              |
| 9 Spectral Width         | 26041.0             |

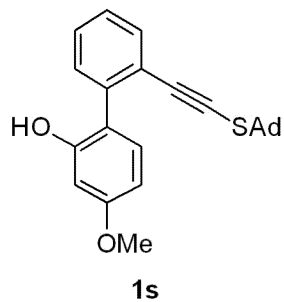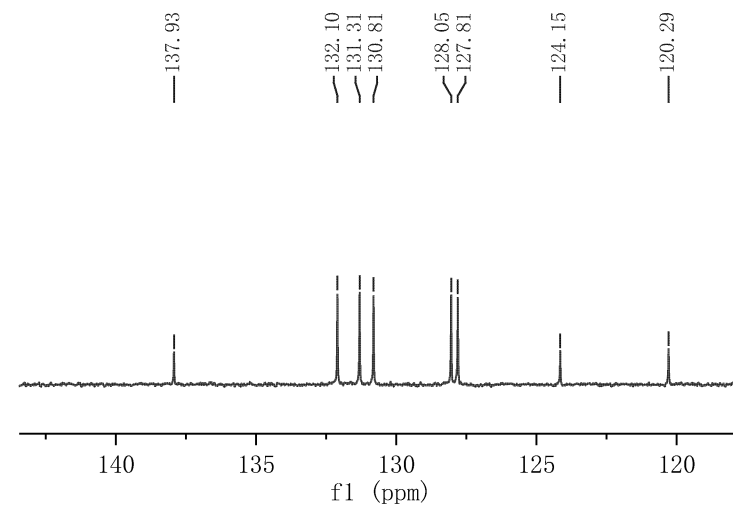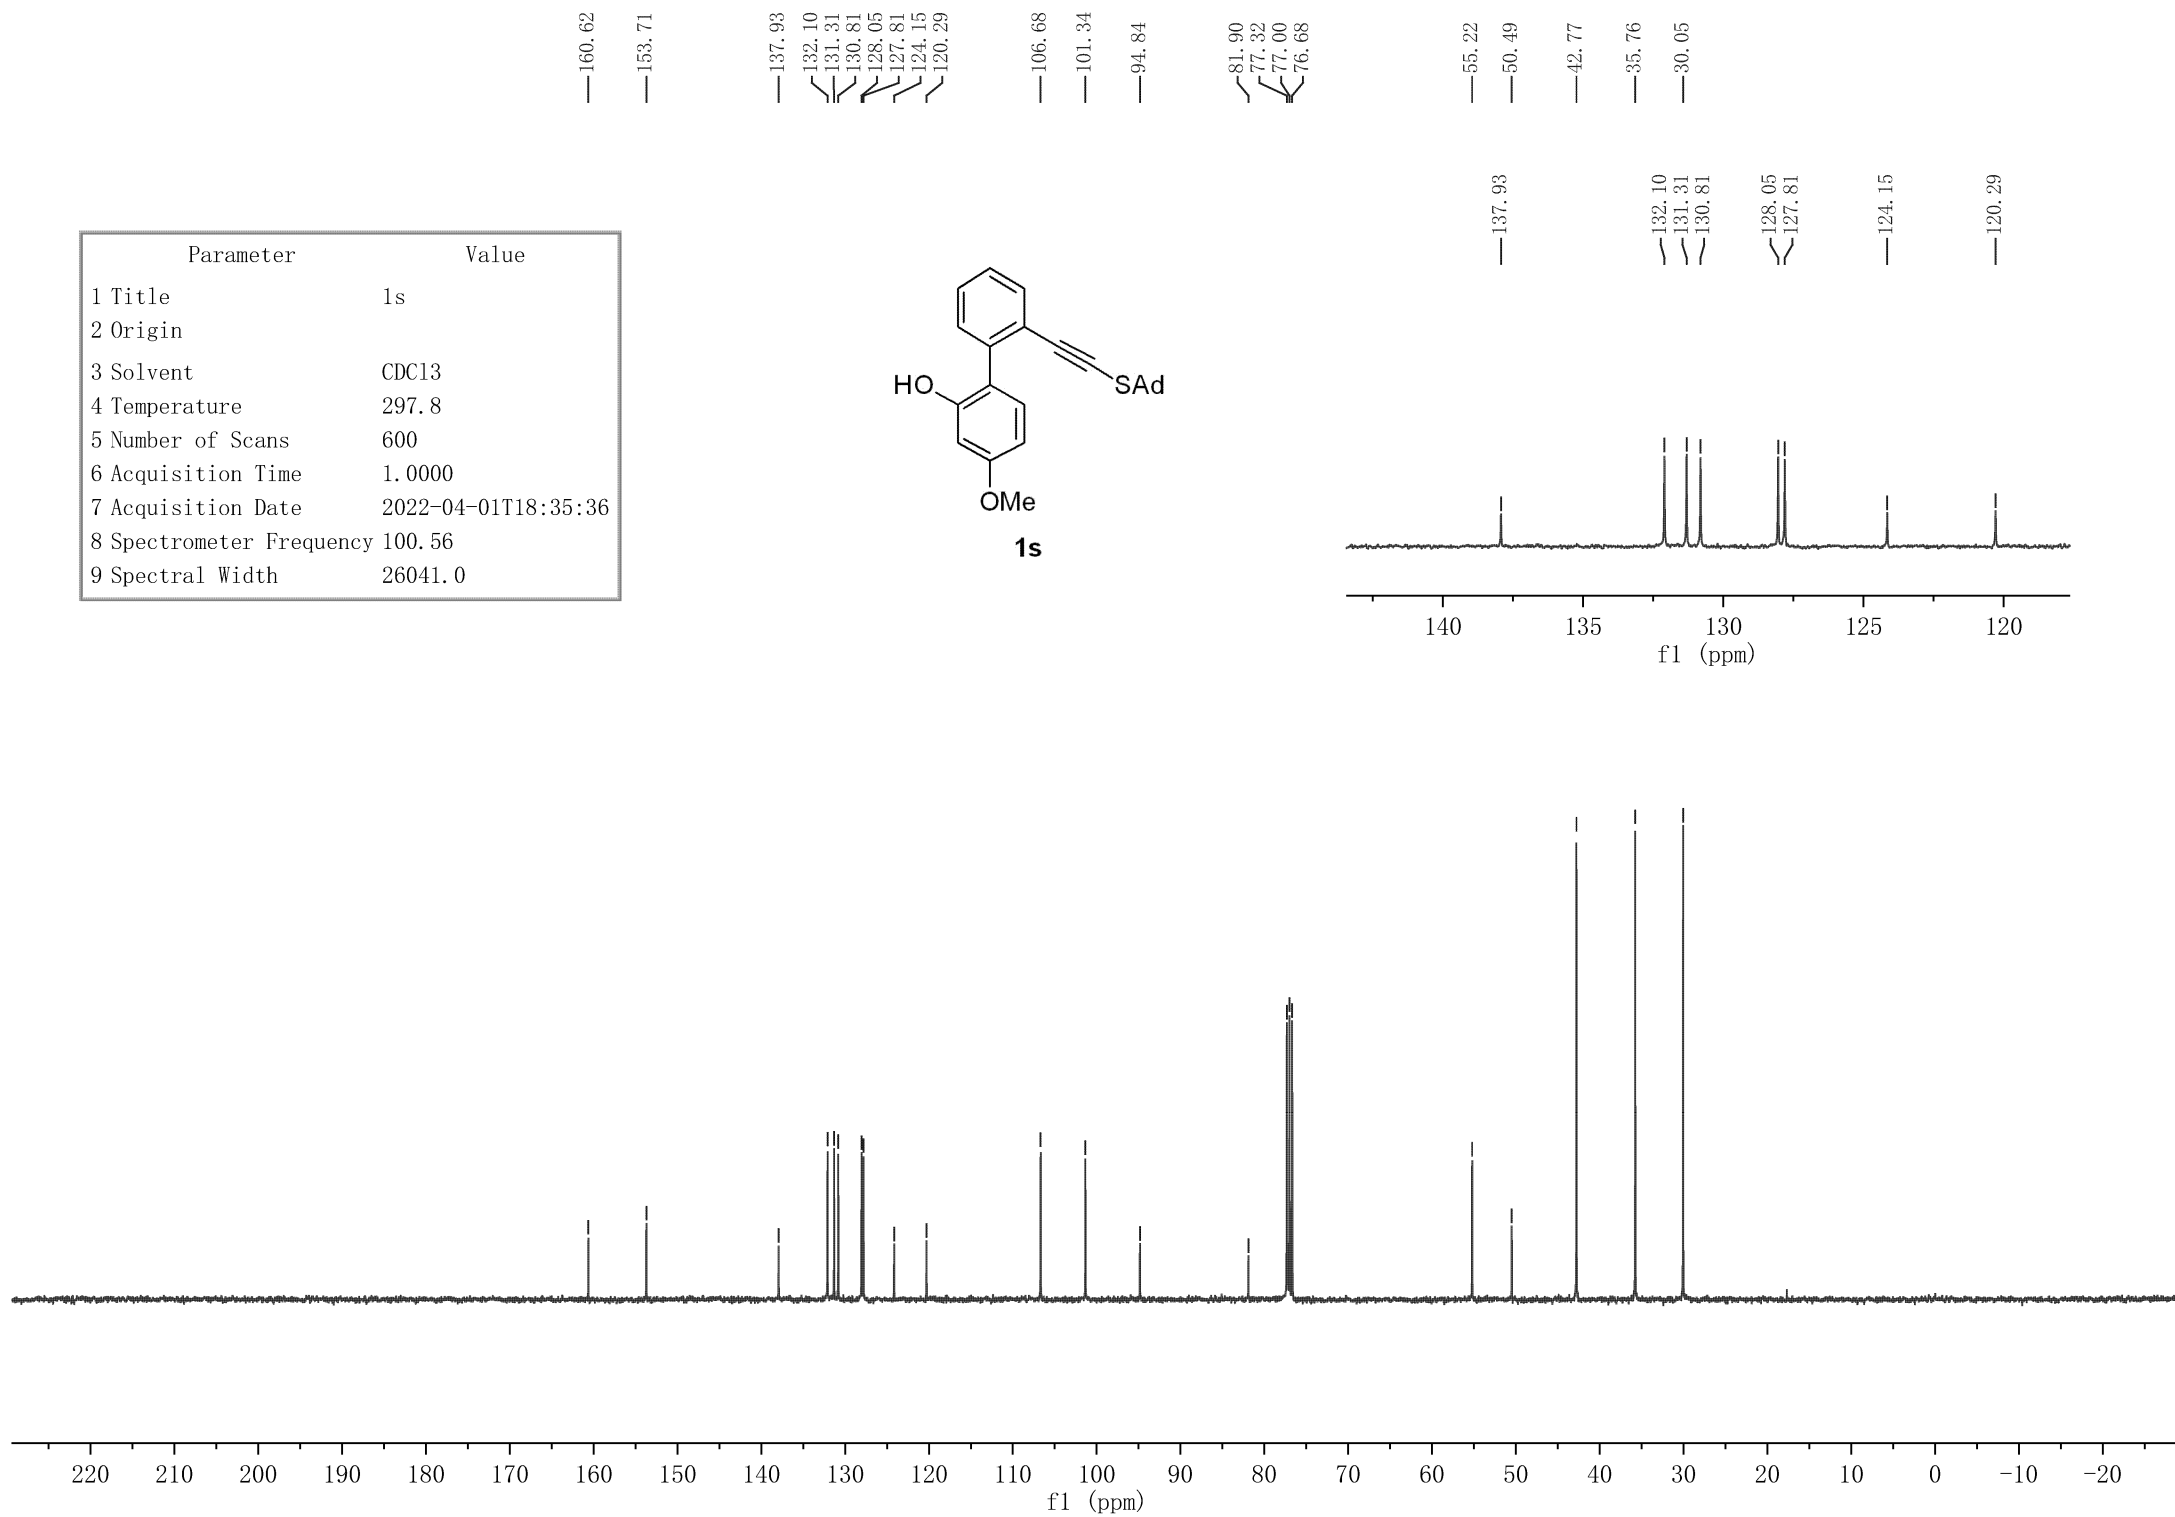

| Parameter                | Value               |
|--------------------------|---------------------|
| 1 Title                  | fxv-8-74-HH         |
| 2 Origin                 | Bruker BioSpin GmbH |
| 3 Solvent                | CDC13               |
| 4 Temperature            | 298.0               |
| 5 Number of Scans        | 3                   |
| 6 Acquisition Time       | 4.0894              |
| 7 Acquisition Date       | 2022-05-05T16:19:25 |
| 8 Spectrometer Frequency | 400.13              |
| 9 Spectral Width         | 8012.8              |

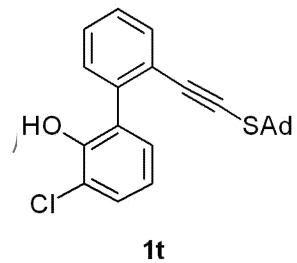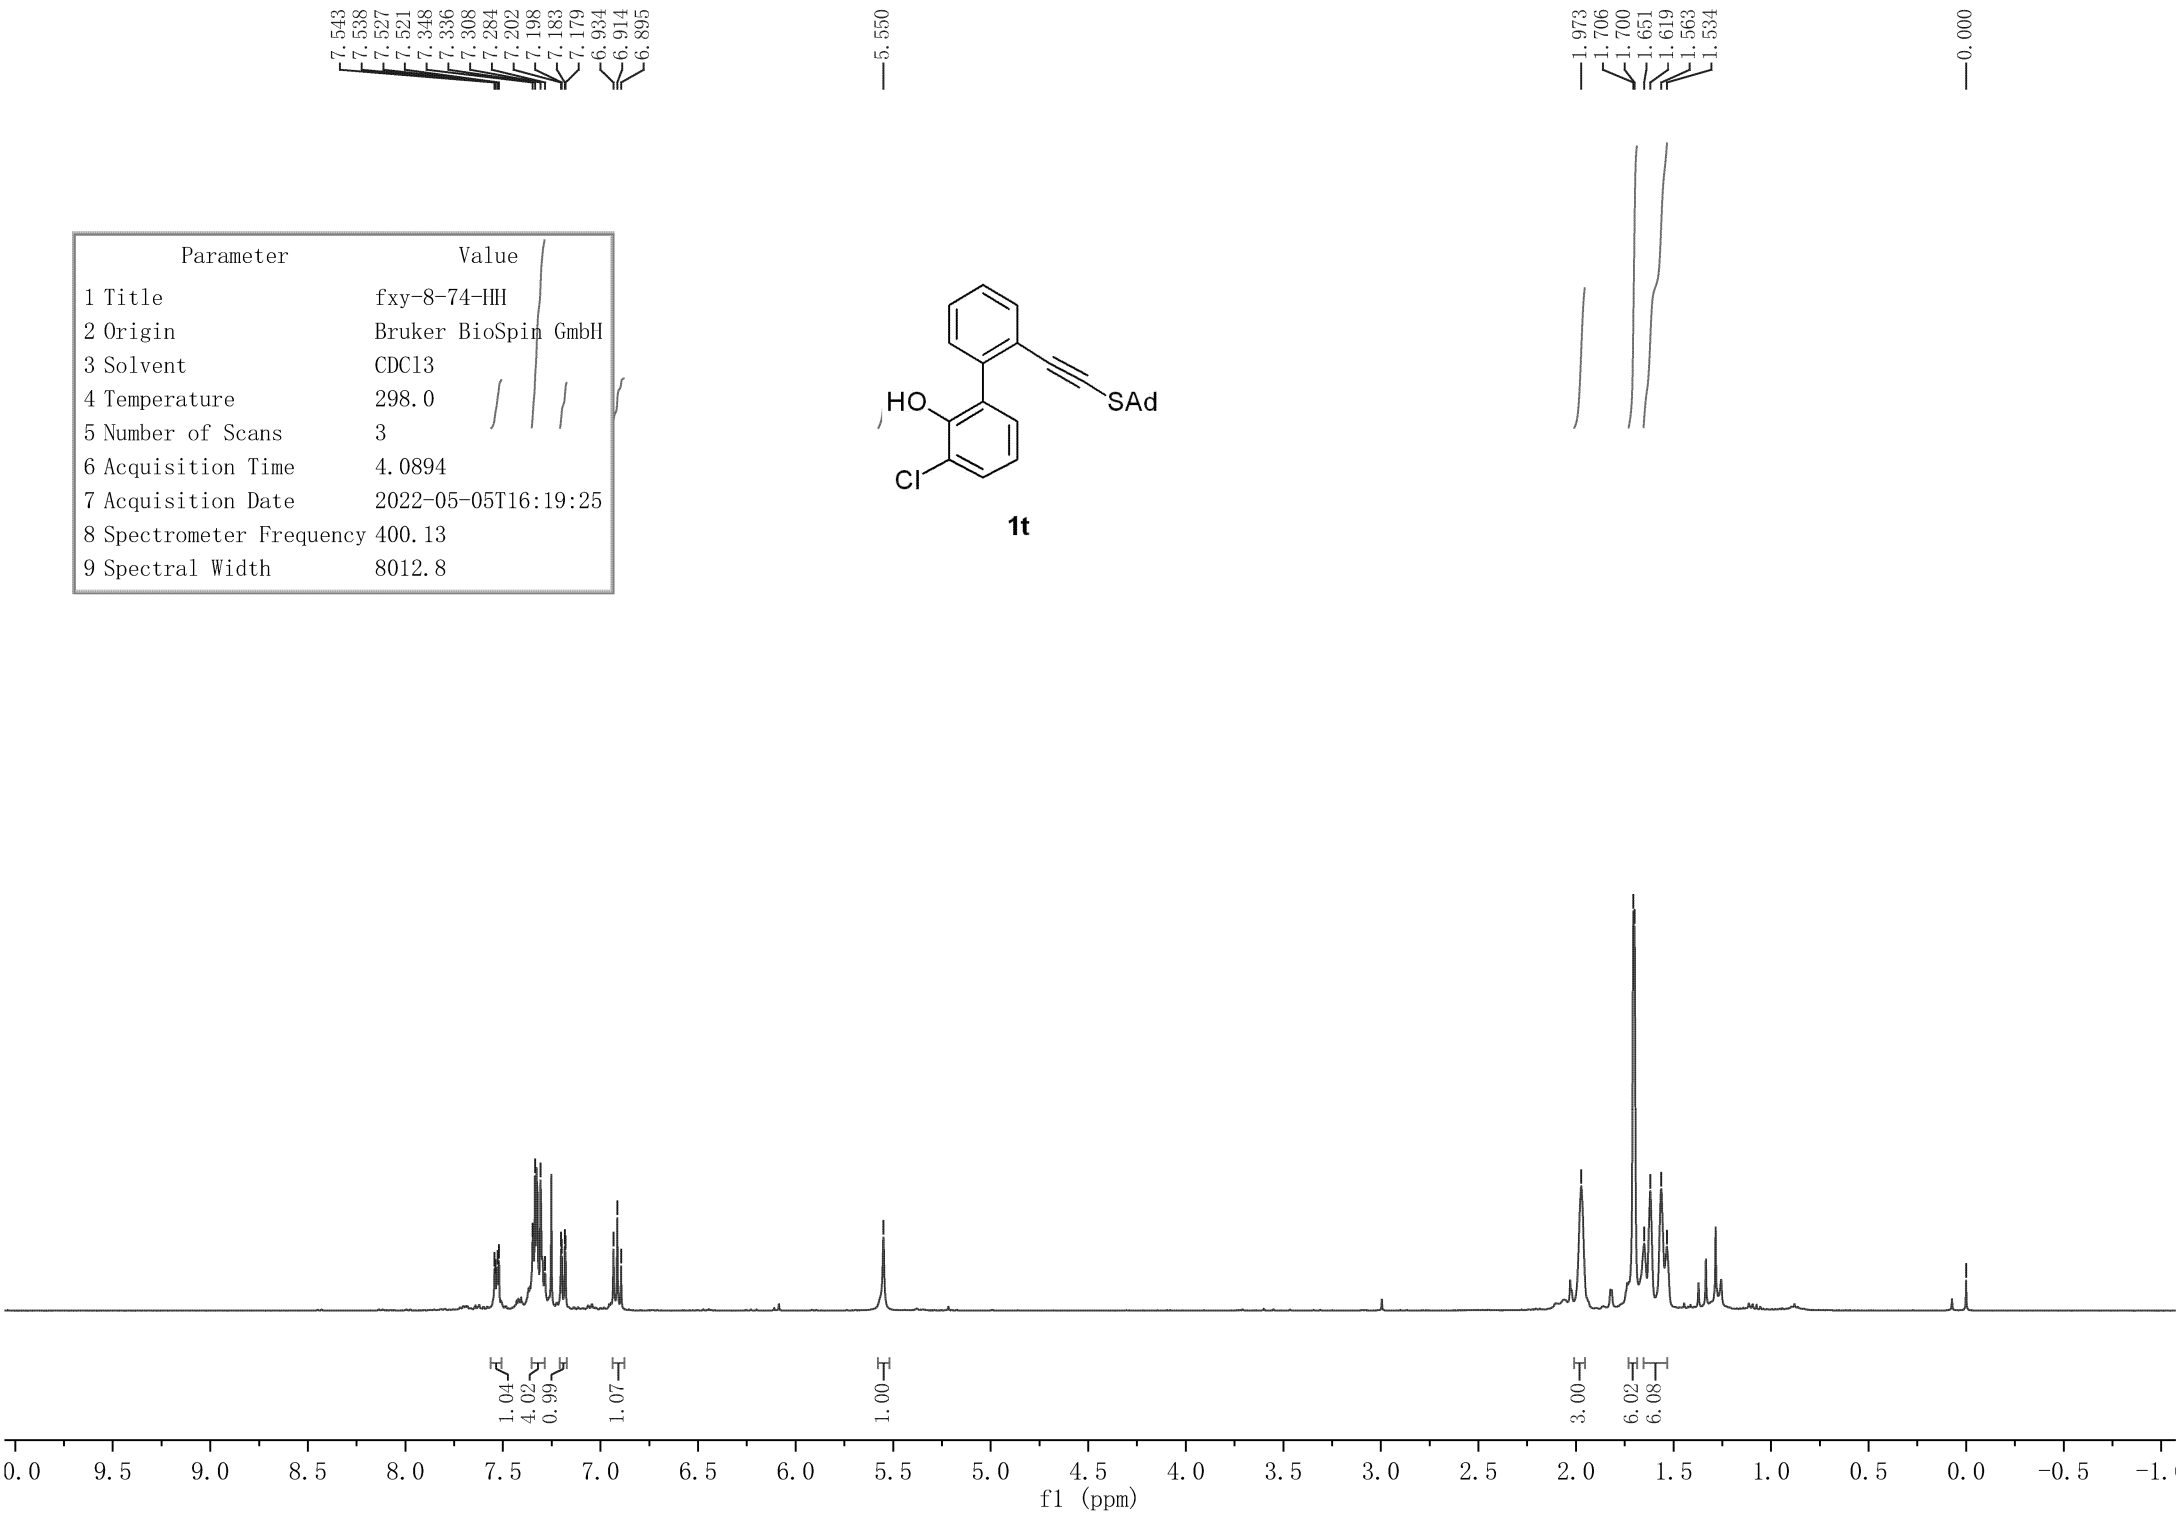

| Parameter                | Value               |
|--------------------------|---------------------|
| 1 Title                  | FXY-8-74-cc         |
| 2 Origin                 |                     |
| 3 Solvent                | CDC13               |
| 4 Temperature            | 299.0               |
| 5 Number of Scans        | 300                 |
| 6 Acquisition Time       | 1.0000              |
| 7 Acquisition Date       | 2022-05-05T17:24:06 |
| 8 Spectrometer Frequency | 100.56              |
| 9 Spectral Width         | 26041.0             |

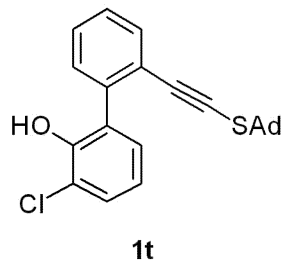

148.78  
 138.32  
 131.95  
 130.06  
 129.99  
 129.28  
 128.63  
 127.91  
 127.61  
 123.80  
 120.67  
 120.51

95.02

81.17  
 77.32  
 77.00  
 76.68

50.28

42.78

35.83

30.05

131.95

130.06

129.99

129.28

128.63

127.91

127.61

123.80

120.67

120.51

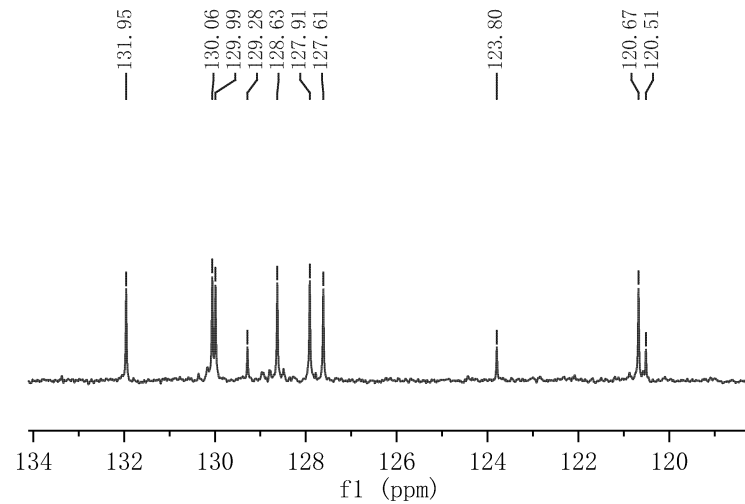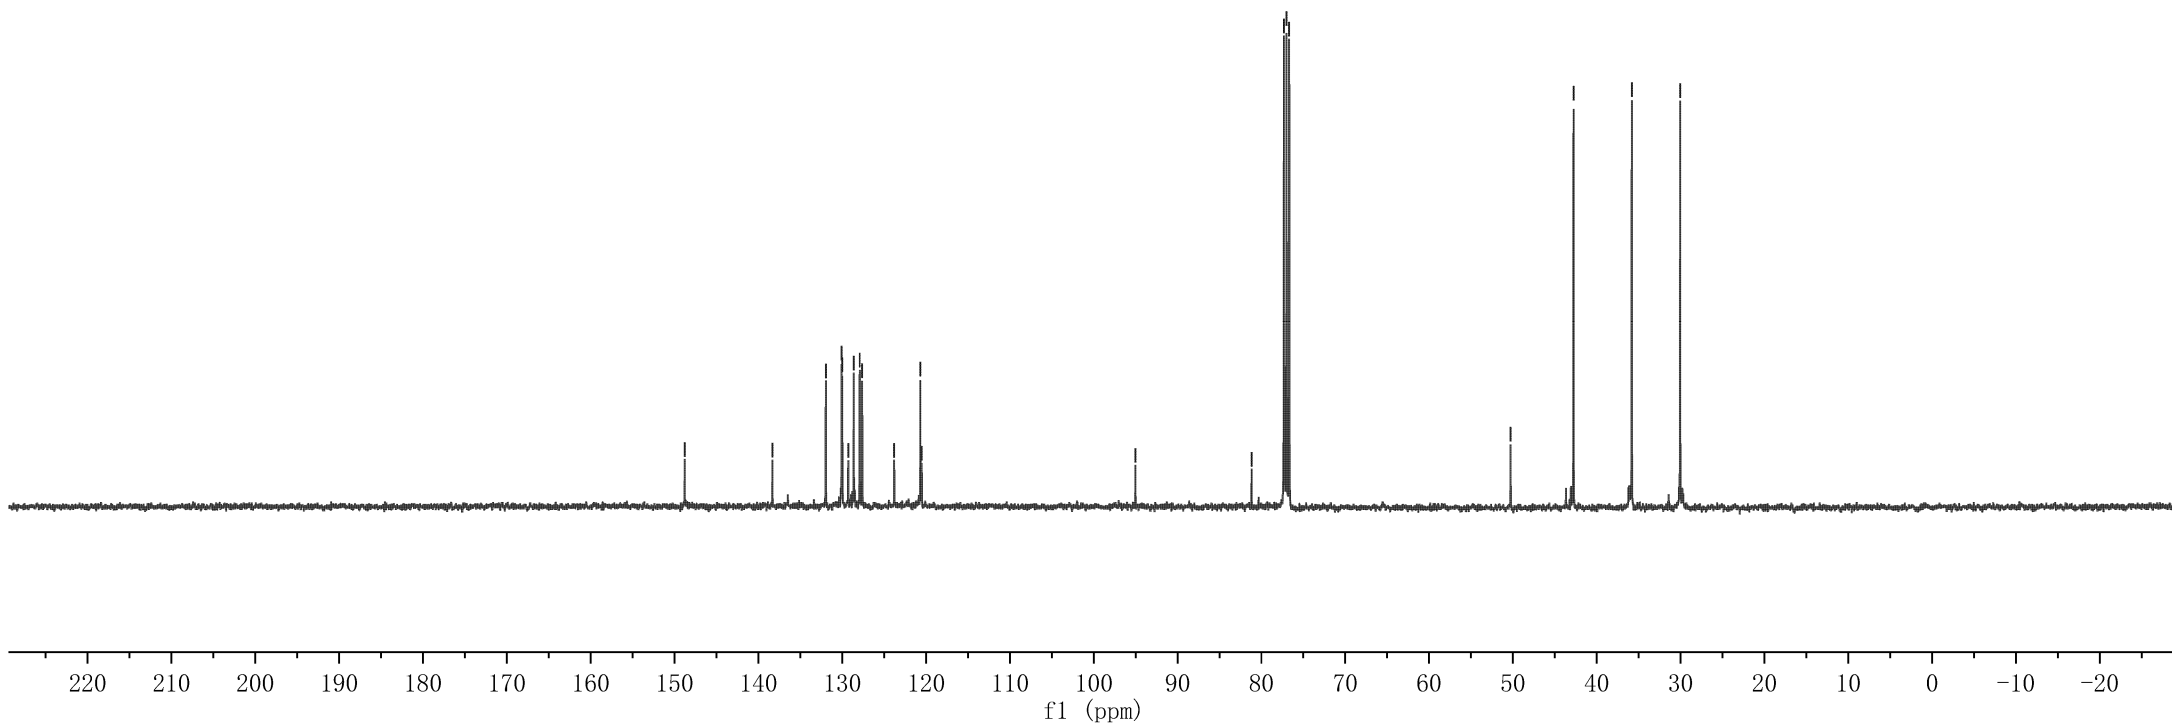

| Parameter                | Value               |
|--------------------------|---------------------|
| 1 Title                  | fxv-8-43            |
| 2 Origin                 | Bruker BioSpin GmbH |
| 3 Solvent                | CDC13               |
| 4 Temperature            | 298.0               |
| 5 Number of Scans        | 5                   |
| 6 Acquisition Time       | 4.0894              |
| 7 Acquisition Date       | 2022-04-14T08:40:26 |
| 8 Spectrometer Frequency | 400.13              |
| 9 Spectral Width         | 8012.8              |

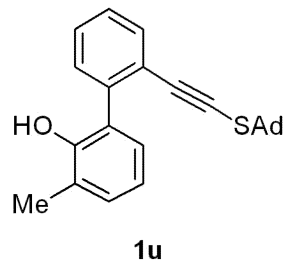

7.534  
7.530  
7.518  
7.511  
7.333  
7.324  
7.316  
7.270  
7.103  
7.085  
7.062  
7.058  
7.043  
7.040  
6.874  
6.855  
6.837

5.031

2.278

1.931  
1.674  
1.667  
1.619  
1.588  
1.535  
1.504

0.000

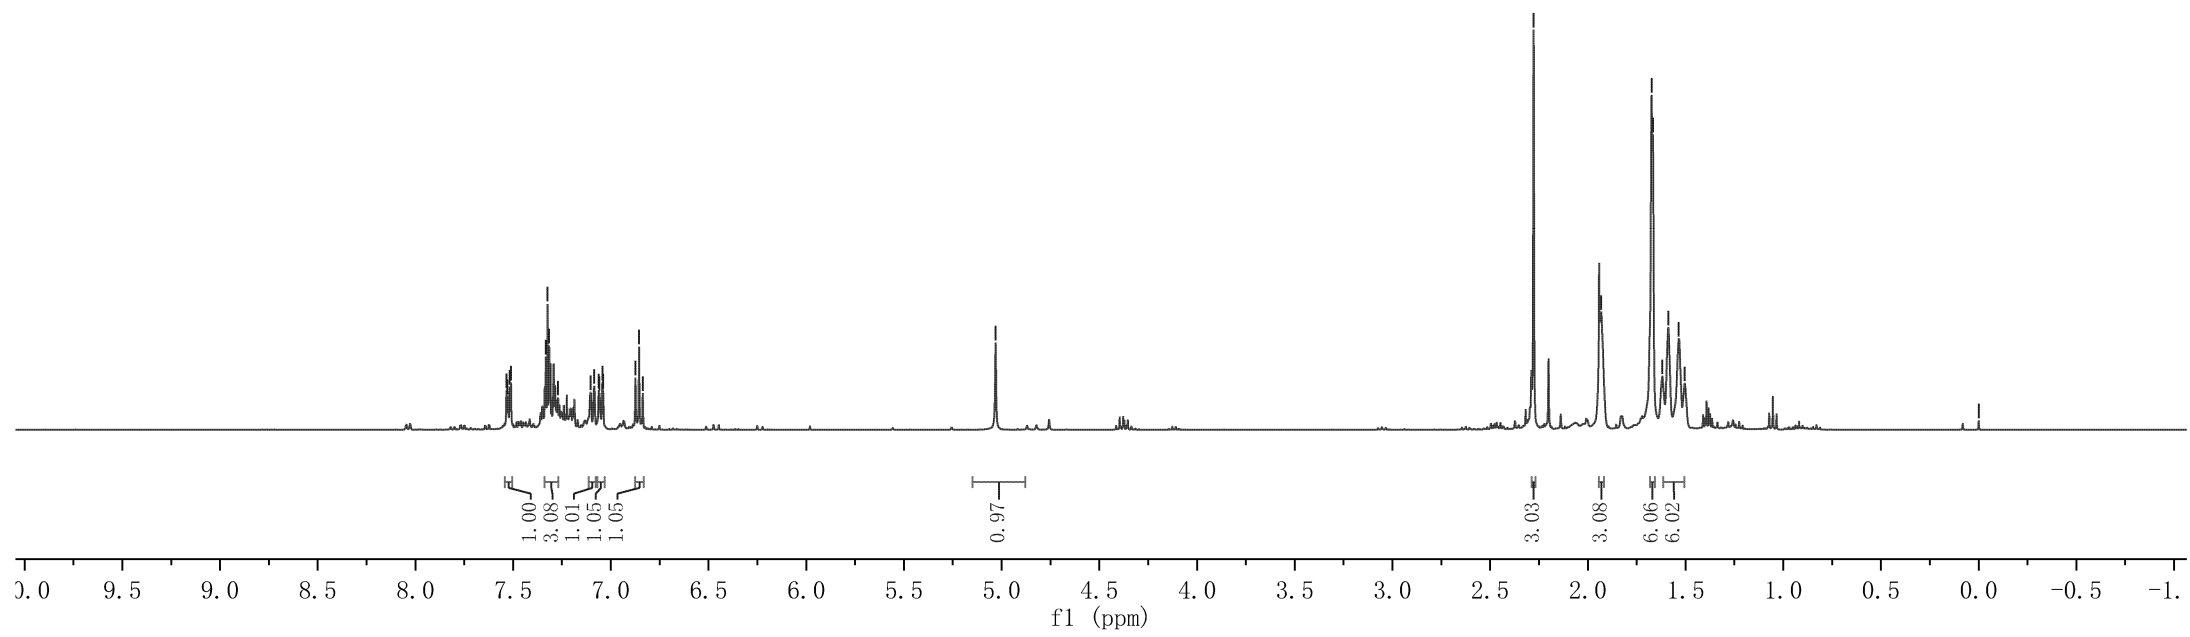

| Parameter                | Value               |
|--------------------------|---------------------|
| 1 Title                  | fxv-8-43C           |
| 2 Origin                 | Bruker BioSpin GmbH |
| 3 Solvent                | CDC13               |
| 4 Temperature            | 300.0               |
| 5 Number of Scans        | 14                  |
| 6 Acquisition Time       | 1.3631              |
| 7 Acquisition Date       | 2022-04-14T08:41:41 |
| 8 Spectrometer Frequency | 100.61              |
| 9 Spectral Width         | 24038.5             |

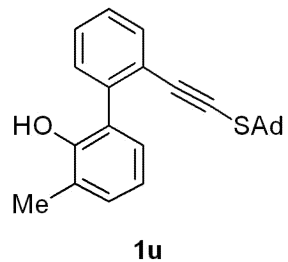

150.80  
 138.45  
 132.01  
 130.56  
 130.47  
 128.22  
 127.99  
 127.91  
 127.12  
 124.68  
 123.96  
 119.91  
 94.69  
 81.92  
 77.32  
 77.00  
 76.68  
 50.36  
 42.63  
 35.70  
 30.01  
 16.18

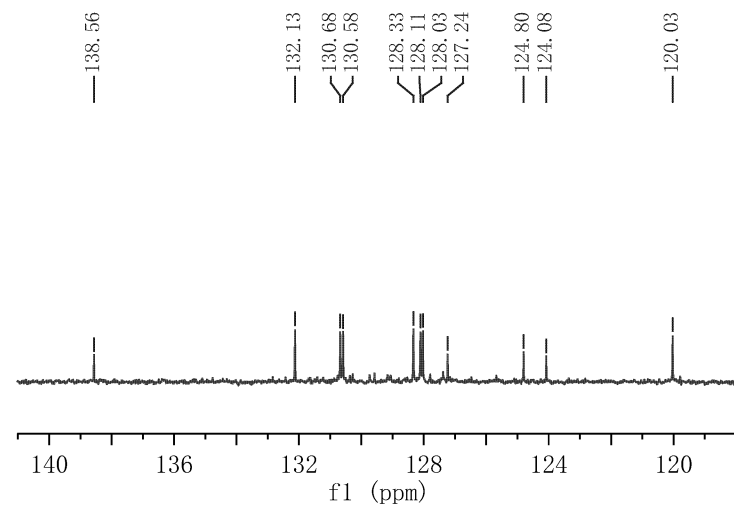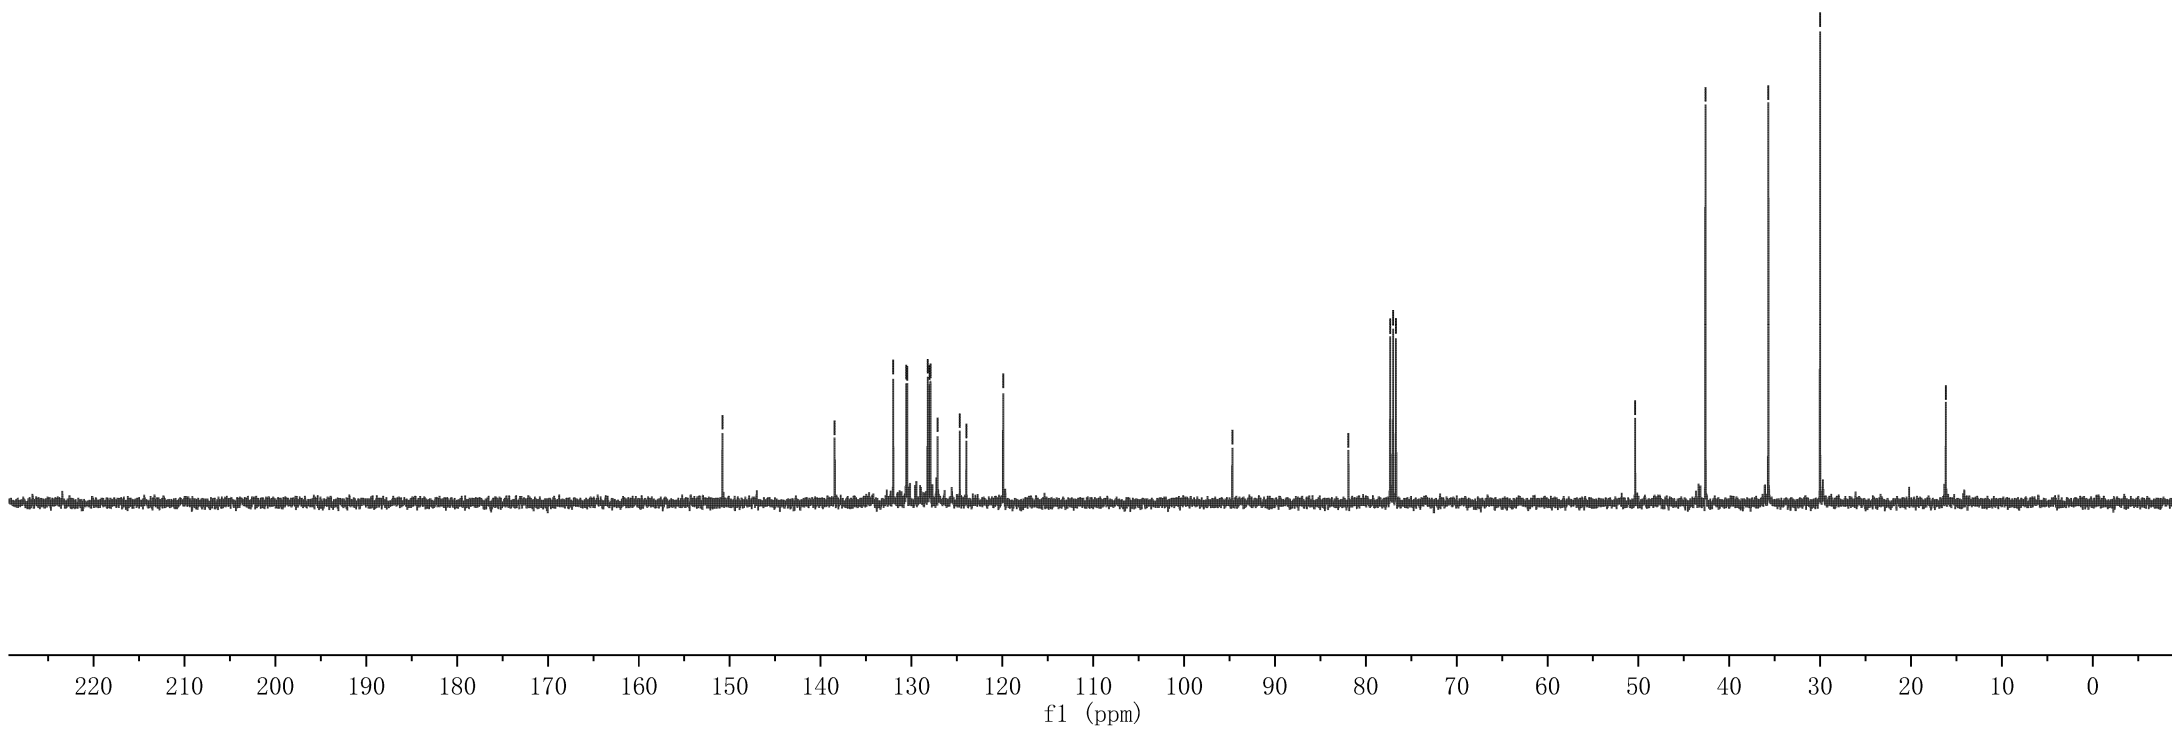

| Parameter                | Value               |
|--------------------------|---------------------|
| 1 Title                  | fxv-8-200           |
| 2 Origin                 | Bruker BioSpin GmbH |
| 3 Solvent                | CDC13               |
| 4 Temperature            | 298.0               |
| 5 Number of Scans        | 4                   |
| 6 Acquisition Time       | 4.0894              |
| 7 Acquisition Date       | 2022-06-22T22:39:52 |
| 8 Spectrometer Frequency | 400.13              |
| 9 Spectral Width         | 8012.8              |

7.531  
7.516  
7.325  
7.295  
7.258  
7.236  
7.225  
7.209  
6.981  
6.961  
6.942

5.083

1.989  
1.654  
1.625  
1.582  
1.553  
1.482  
1.447  
1.356  
1.315  
1.280  
0.773

0.000

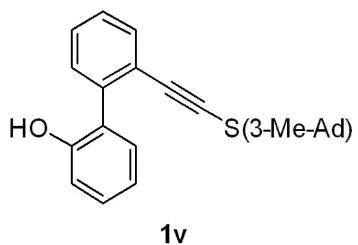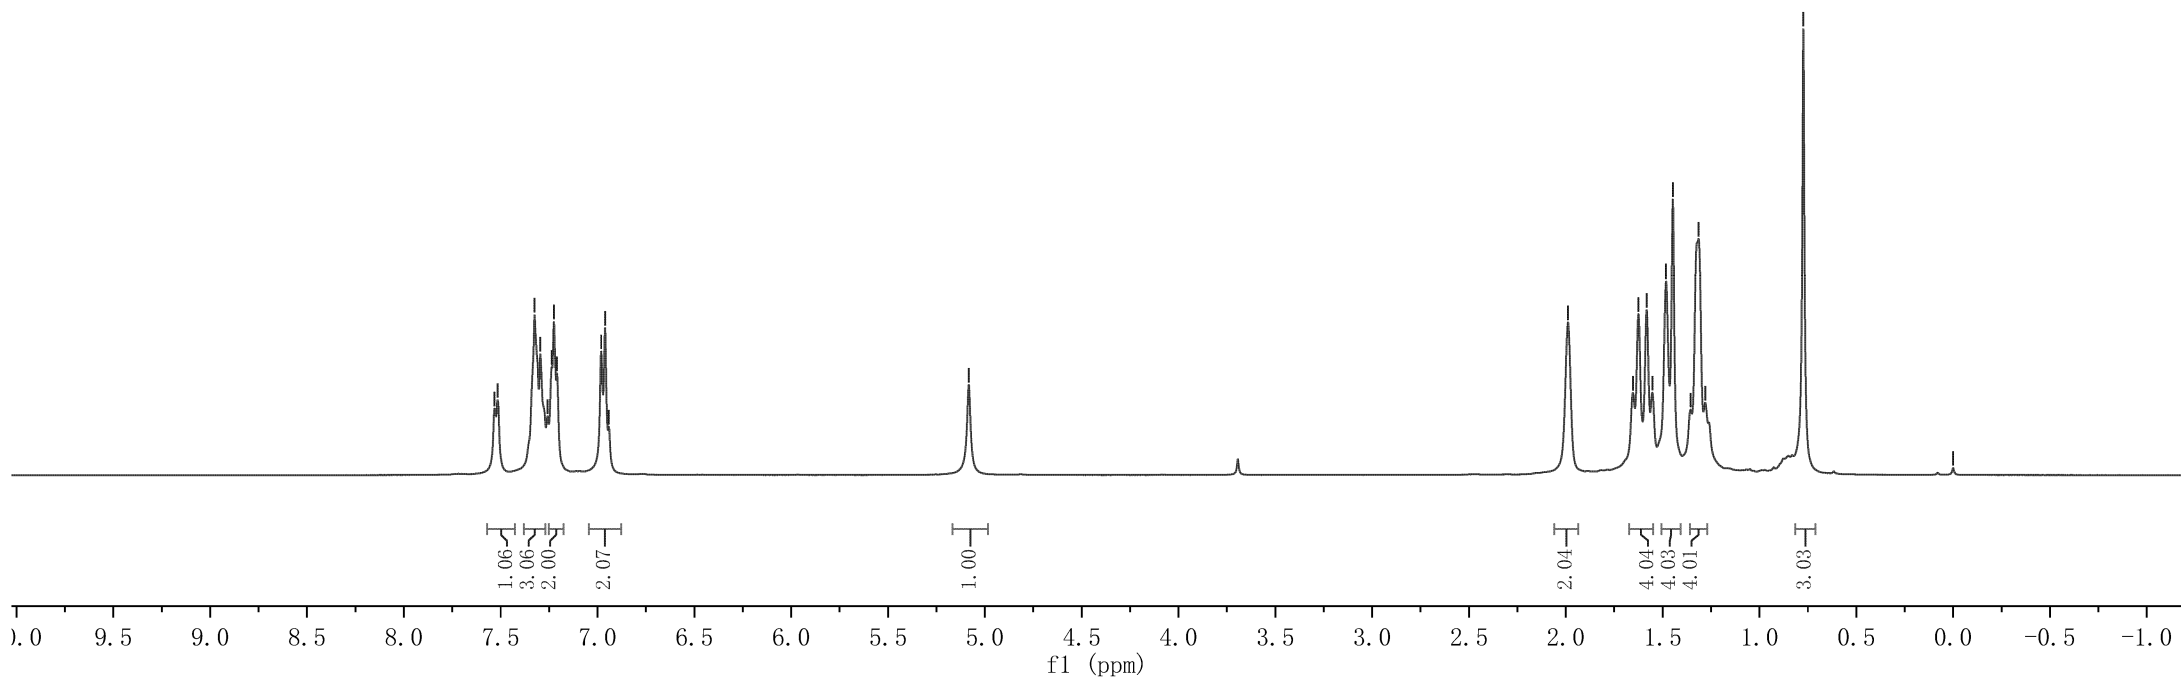



| Parameter                | Value               |
|--------------------------|---------------------|
| 1 Title                  | fxv-8-200-C         |
| 2 Origin                 | Bruker BioSpin GmbH |
| 3 Solvent                | CDC13               |
| 4 Temperature            | 300.0               |
| 5 Number of Scans        | 18                  |
| 6 Acquisition Time       | 1.3631              |
| 7 Acquisition Date       | 2022-06-22T22:40:49 |
| 8 Spectrometer Frequency | 100.61              |
| 9 Spectral Width         | 24038.5             |

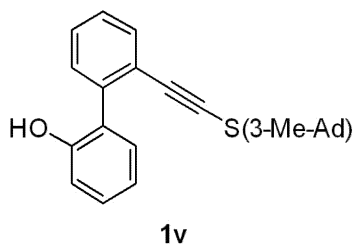

152.66  
 138.16  
 132.15  
 130.71  
 130.52  
 129.27  
 128.01  
 127.95  
 127.60  
 123.87  
 120.45  
 116.04  
 94.62  
 81.99  
 77.32  
 77.00  
 76.68  
 50.80  
 49.43  
 42.76  
 41.93  
 34.92  
 32.41  
 30.37  
 30.33

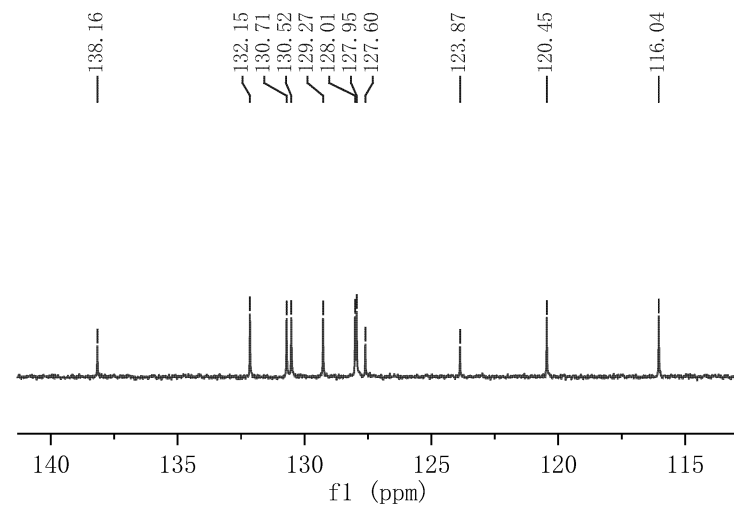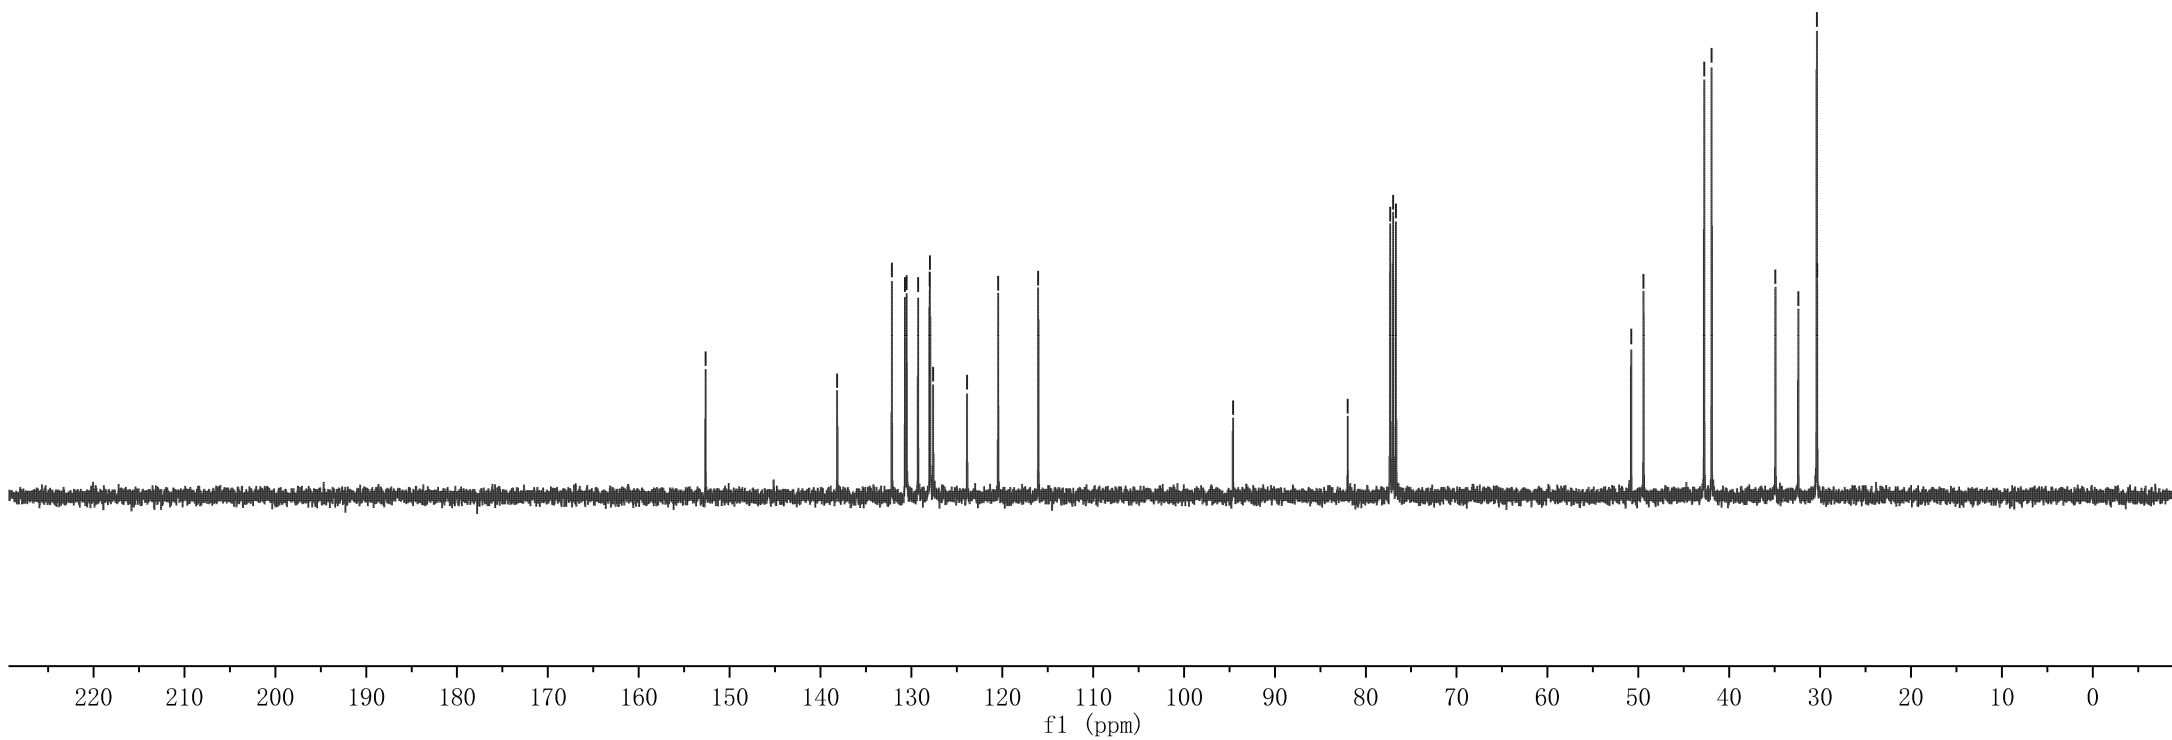

7.539  
7.531  
7.522  
7.516  
7.346  
7.311  
7.298  
7.277  
7.246  
7.240  
7.228  
7.224  
7.006  
6.974  
6.955  
6.935

5.511

1.308  
1.031  
1.001  
0.981  
0.950  
0.803

0.000

| Parameter                | Value               |
|--------------------------|---------------------|
| 1 Title                  | FXY-8-190           |
| 2 Origin                 |                     |
| 3 Solvent                | CDC13               |
| 4 Temperature            | 299.5               |
| 5 Number of Scans        | 16                  |
| 6 Acquisition Time       | 4.0002              |
| 7 Acquisition Date       | 2022-06-16T20:46:15 |
| 8 Spectrometer Frequency | 399.92              |
| 9 Spectral Width         | 8012.0              |

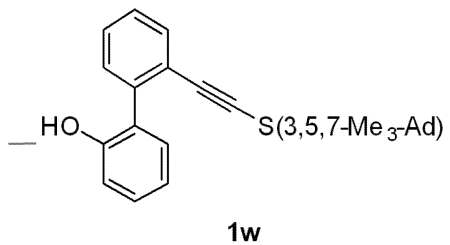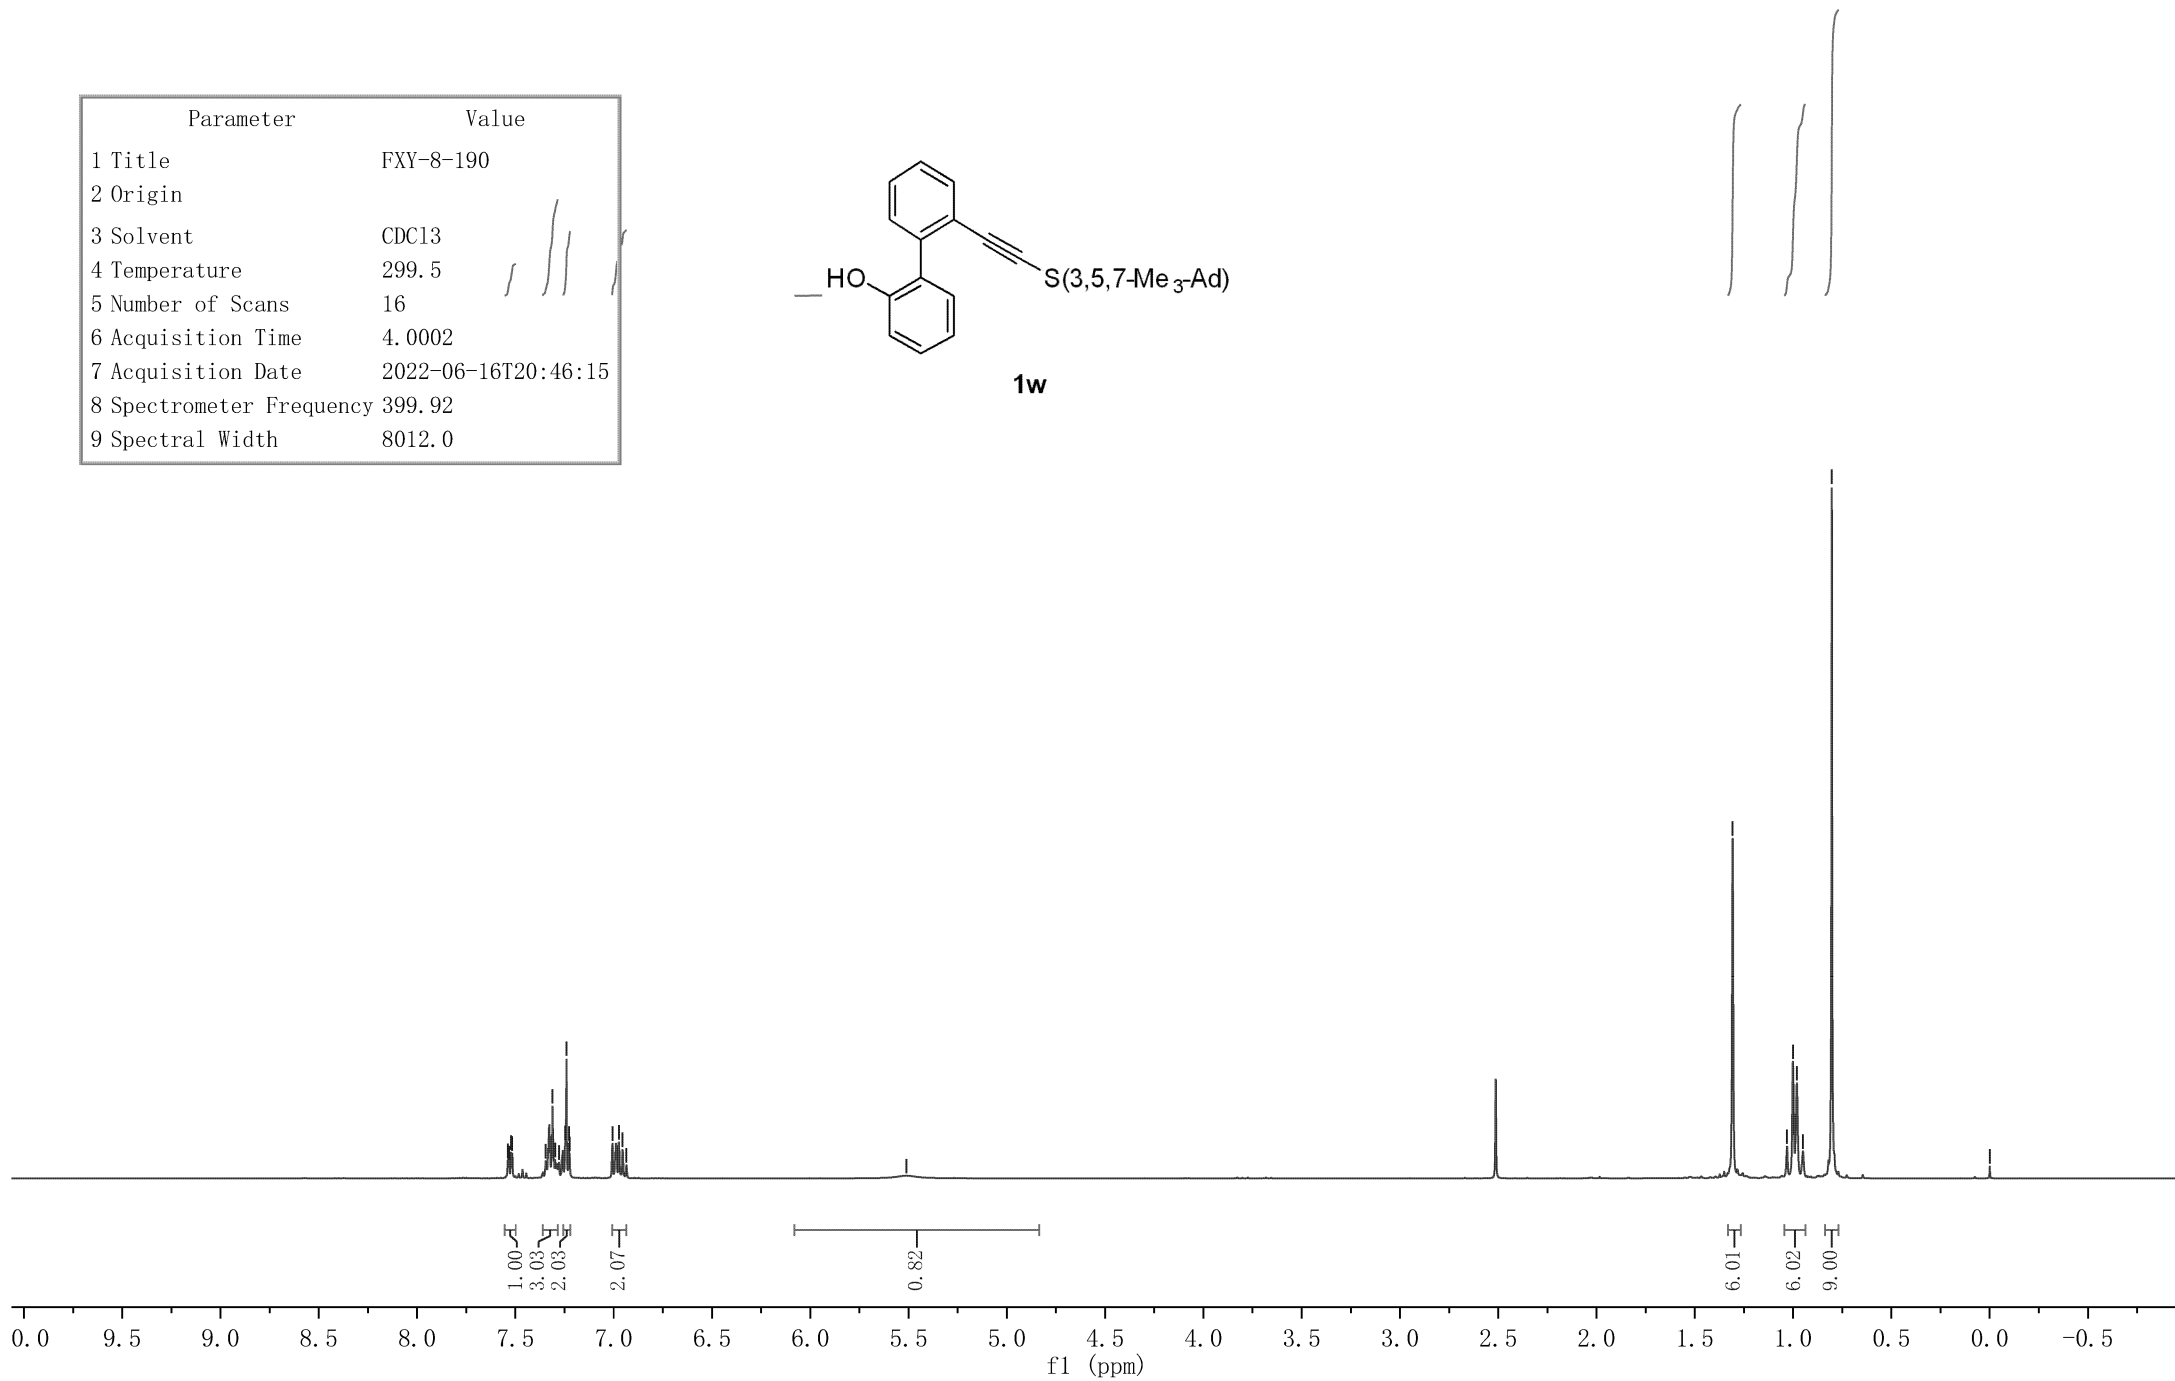

| Parameter                | Value               |
|--------------------------|---------------------|
| 1 Title                  | FXY-8-190           |
| 2 Origin                 |                     |
| 3 Solvent                | CDC13               |
| 4 Temperature            | 299.8               |
| 5 Number of Scans        | 600                 |
| 6 Acquisition Time       | 1.0000              |
| 7 Acquisition Date       | 2022-06-16T21:08:55 |
| 8 Spectrometer Frequency | 100.56              |
| 9 Spectral Width         | 26041.0             |

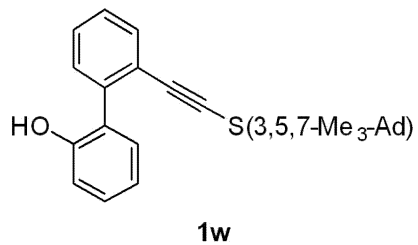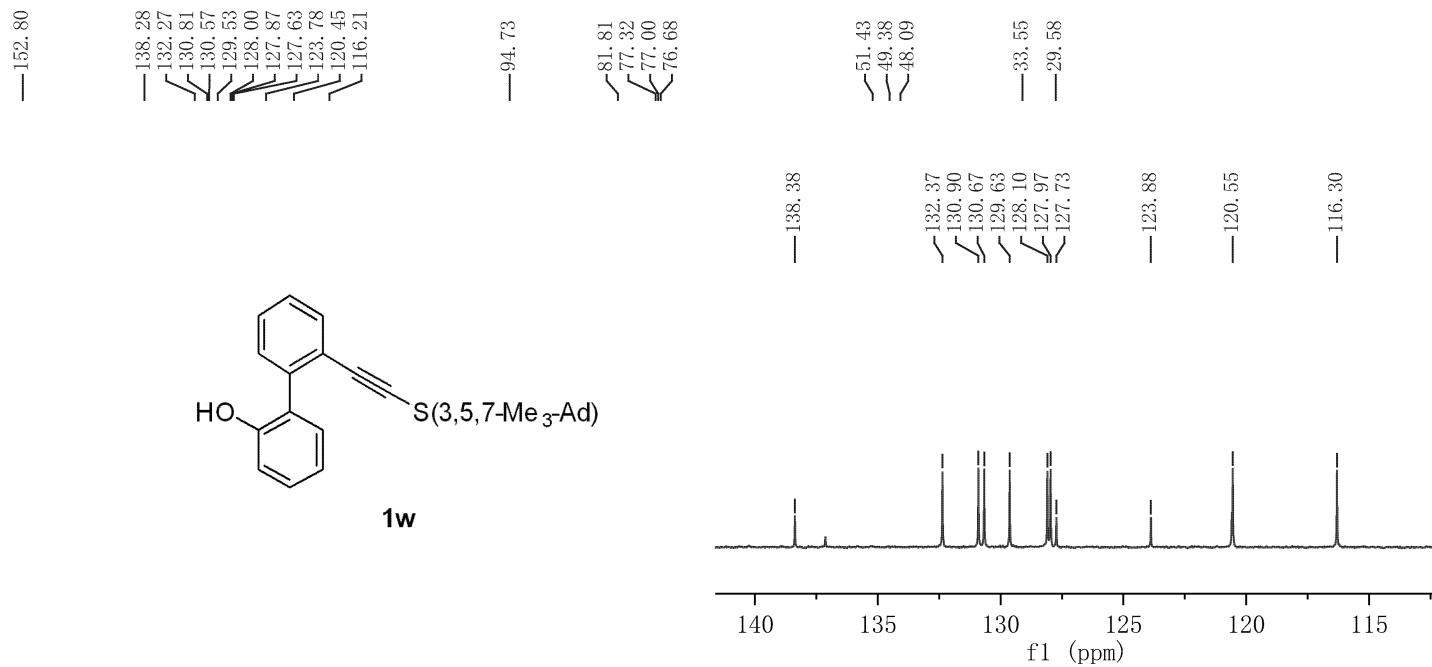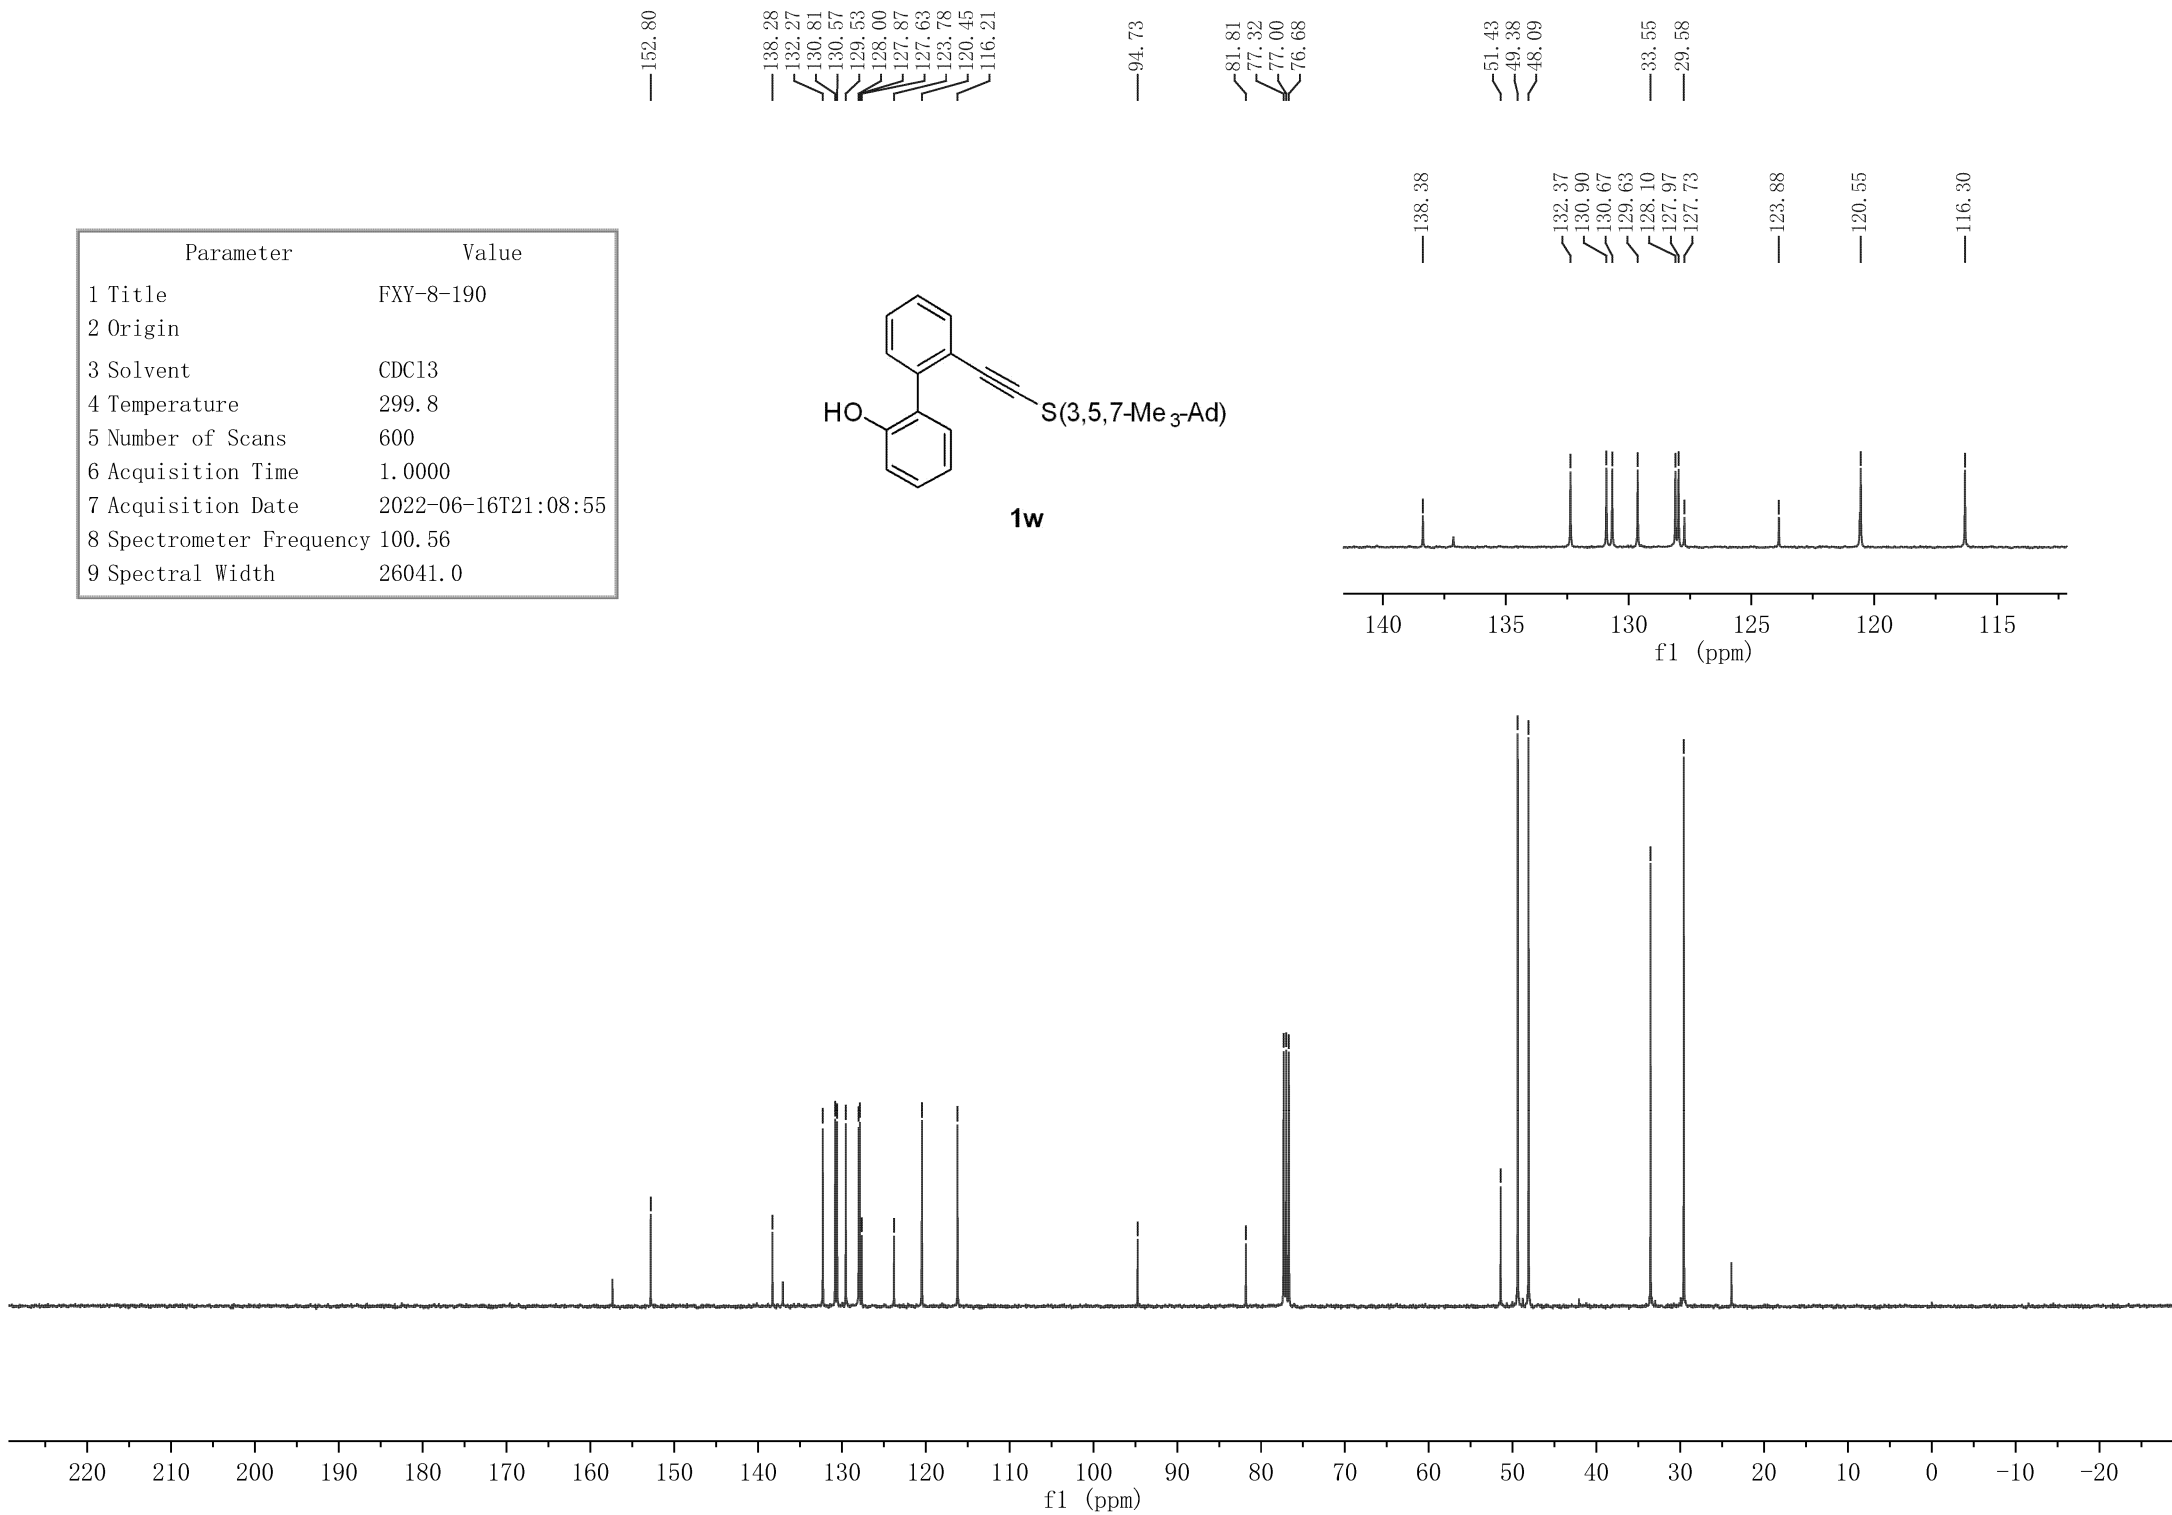

| Parameter                | Value               |
|--------------------------|---------------------|
| 1 Title                  | FXY-8-186           |
| 2 Origin                 |                     |
| 3 Solvent                | CDC13               |
| 4 Temperature            | 299.8               |
| 5 Number of Scans        | 16                  |
| 6 Acquisition Time       | 4.0002              |
| 7 Acquisition Date       | 2022-06-15T22:45:26 |
| 8 Spectrometer Frequency | 399.92              |
| 9 Spectral Width         | 8012.0              |

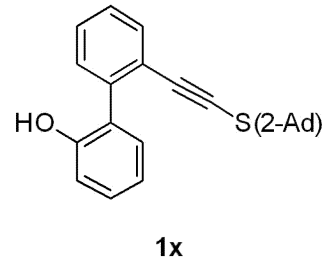

7.515  
7.512  
7.498  
7.493  
7.352  
7.336  
7.312  
7.268  
7.211  
7.207  
7.193  
7.189  
6.984  
6.978  
6.960  
6.941

5.039

3.332

2.008  
1.976  
1.848  
1.817  
1.791  
1.703  
1.674  
1.644  
1.491  
1.458

0.000

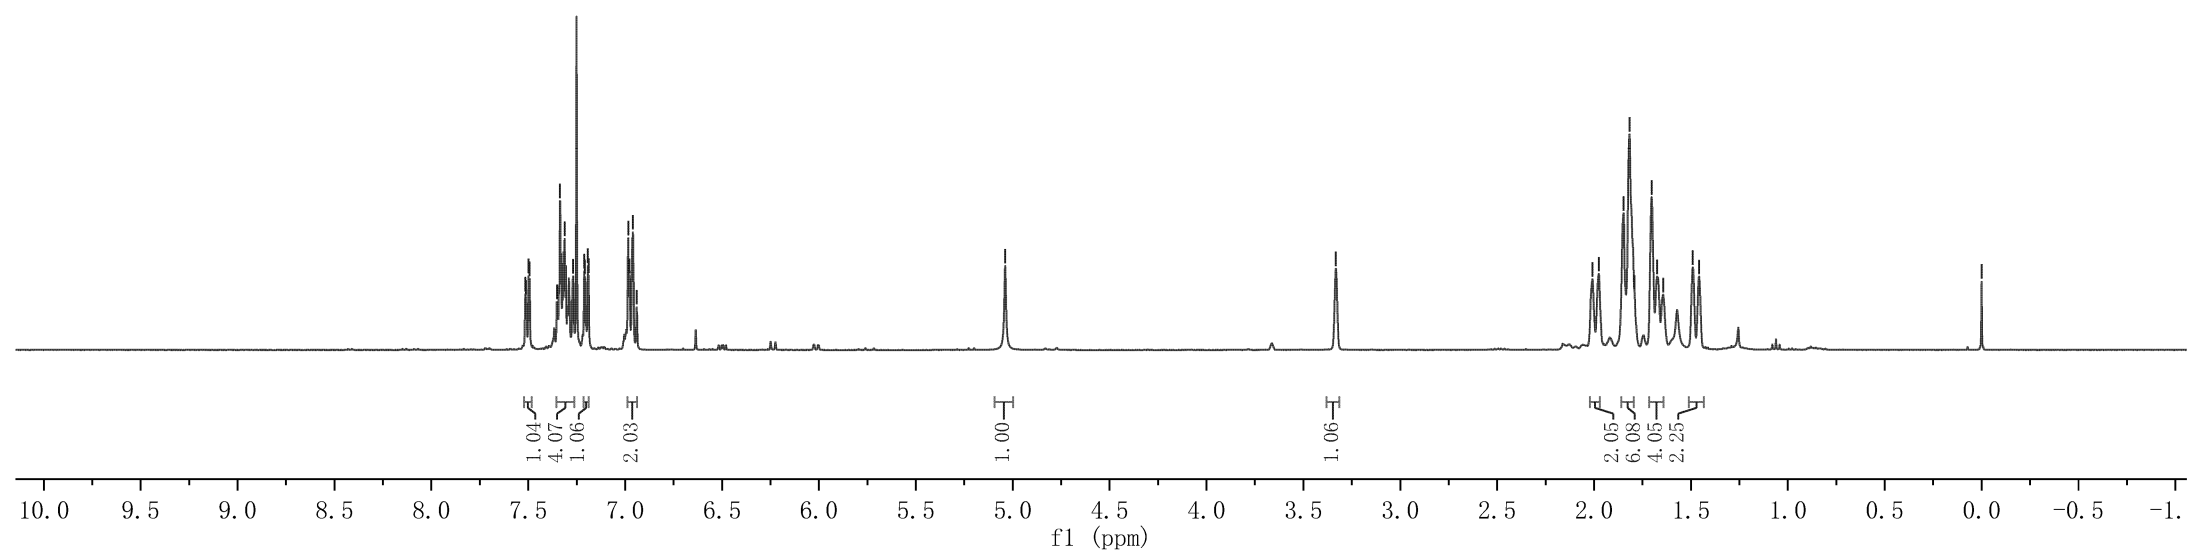

| Parameter                | Value               |
|--------------------------|---------------------|
| 1 Title                  | FXY-8-186           |
| 2 Origin                 |                     |
| 3 Solvent                | CDC13               |
| 4 Temperature            | 299.5               |
| 5 Number of Scans        | 200                 |
| 6 Acquisition Time       | 1.0000              |
| 7 Acquisition Date       | 2022-06-15T23:54:31 |
| 8 Spectrometer Frequency | 100.56              |
| 9 Spectral Width         | 26041.0             |

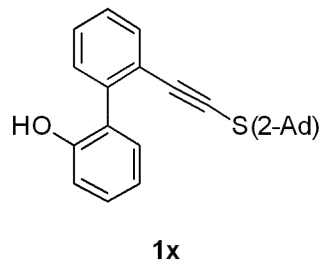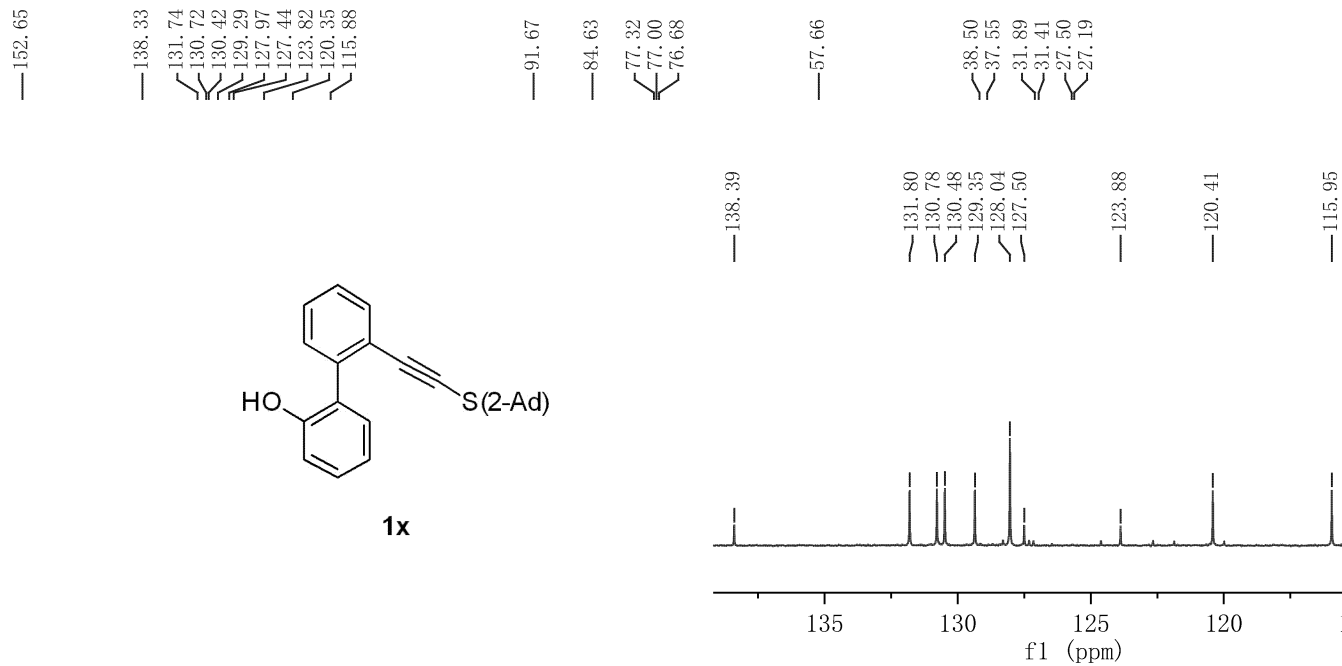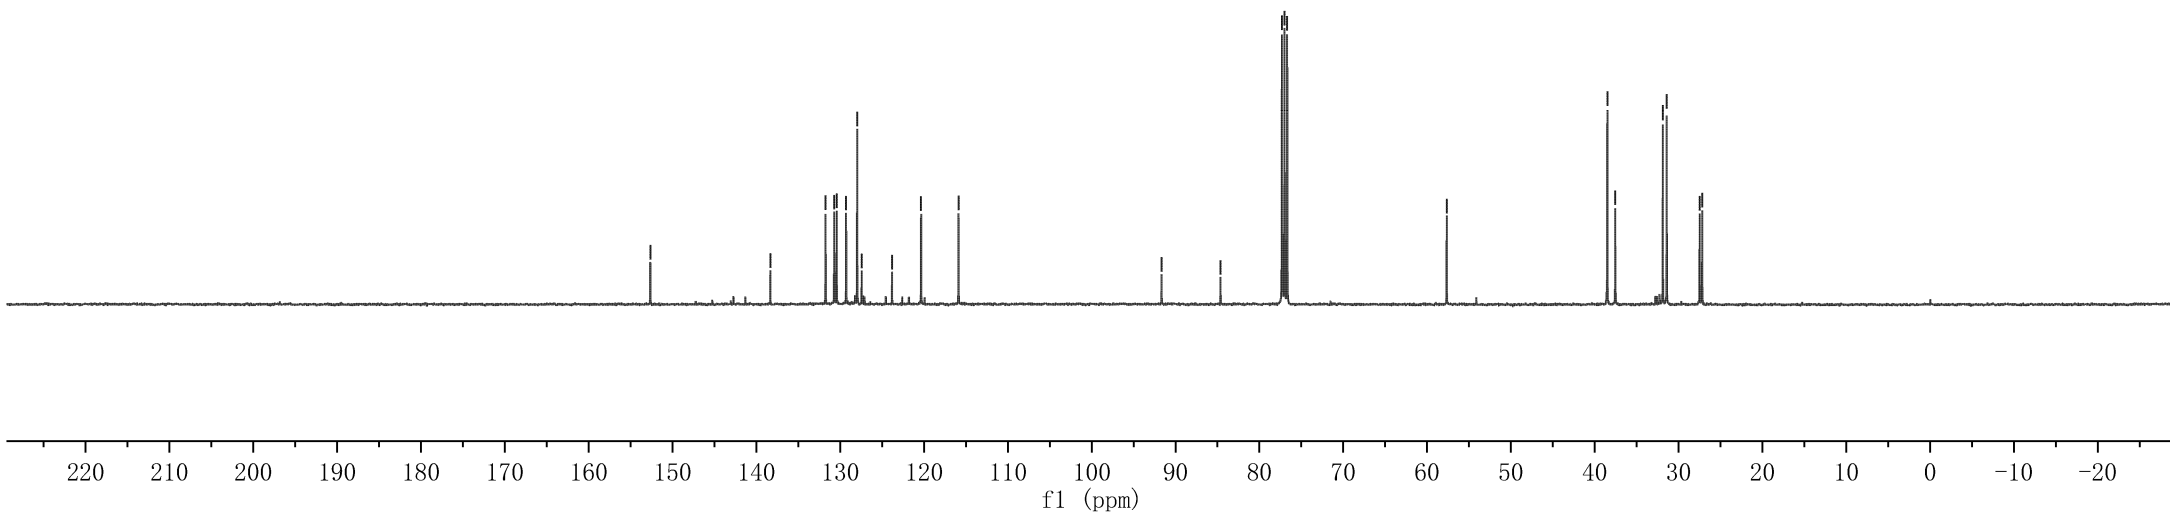

7.538  
7.532  
7.521  
7.516  
7.351  
7.336  
7.314  
7.292  
7.246  
7.232  
7.226  
7.206  
6.972  
6.953  
6.935

5.062

1.198

0.000

| Parameter                | Value               |
|--------------------------|---------------------|
| 1 Title                  | FXY-1y              |
| 2 Origin                 |                     |
| 3 Solvent                | CDC13               |
| 4 Temperature            | 300.3               |
| 5 Number of Scans        | 16                  |
| 6 Acquisition Time       | 4.0002              |
| 7 Acquisition Date       | 2023-08-10T23:01:12 |
| 8 Spectrometer Frequency | 399.90              |
| 9 Spectral Width         | 8012.0              |

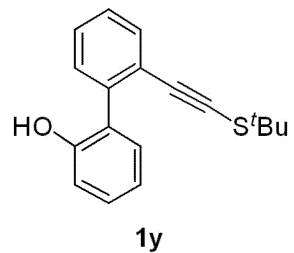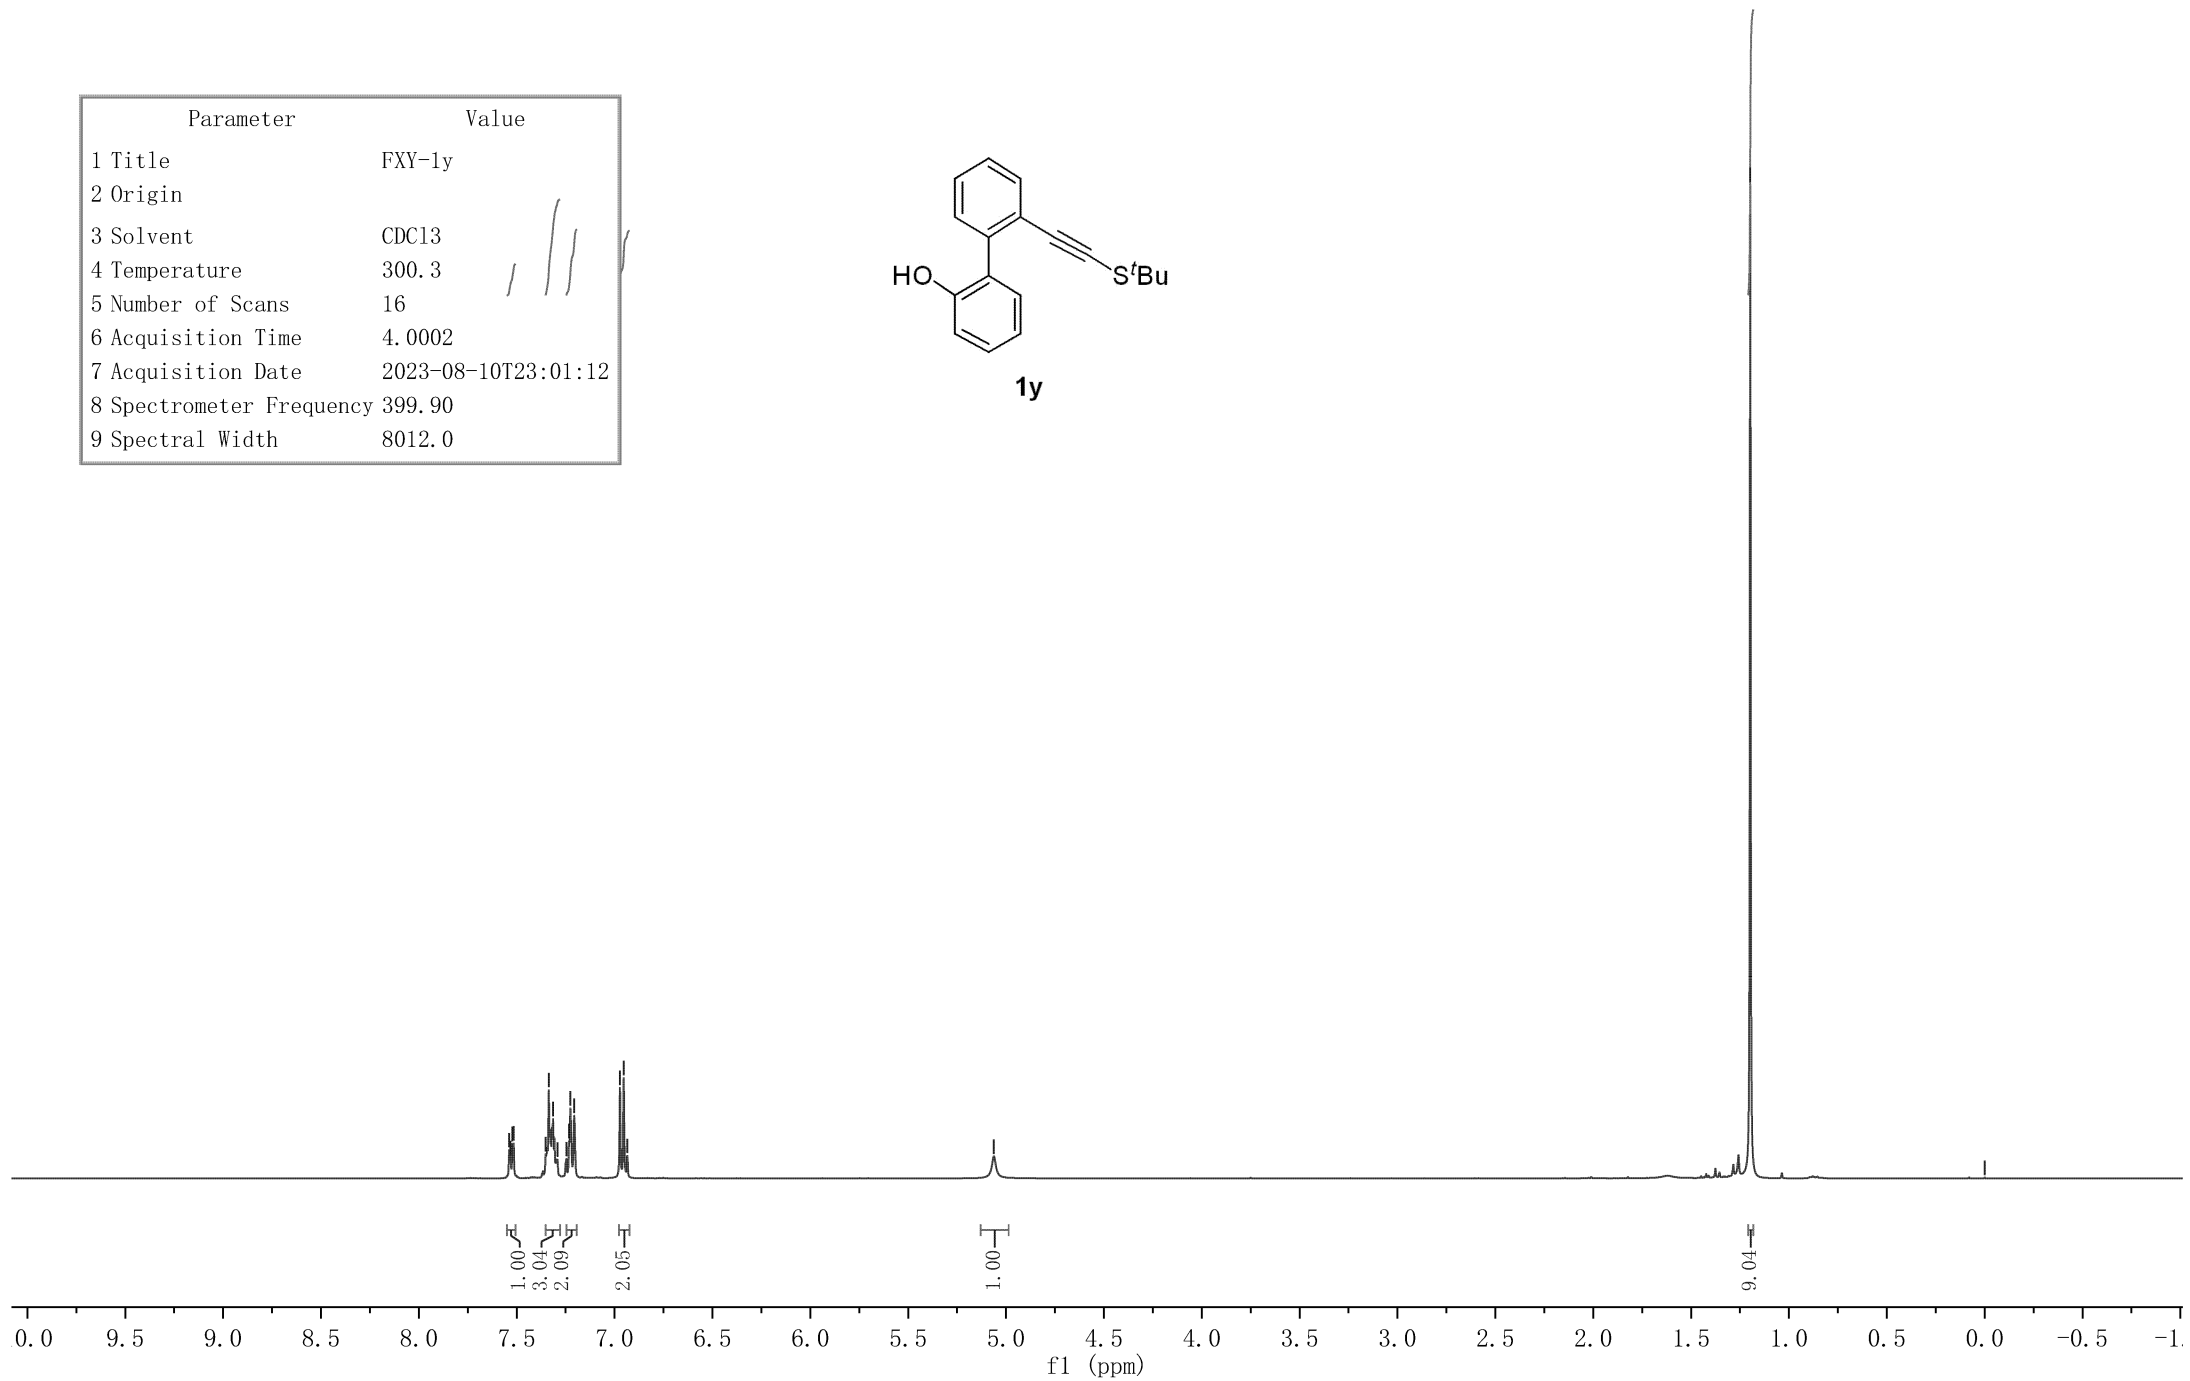

| Parameter                | Value               |
|--------------------------|---------------------|
| 1 Title                  | FXY-1y              |
| 2 Origin                 |                     |
| 3 Solvent                | CDC13               |
| 4 Temperature            | 300.6               |
| 5 Number of Scans        | 200                 |
| 6 Acquisition Time       | 1.0000              |
| 7 Acquisition Date       | 2023-08-10T23:10:37 |
| 8 Spectrometer Frequency | 100.56              |
| 9 Spectral Width         | 26041.0             |

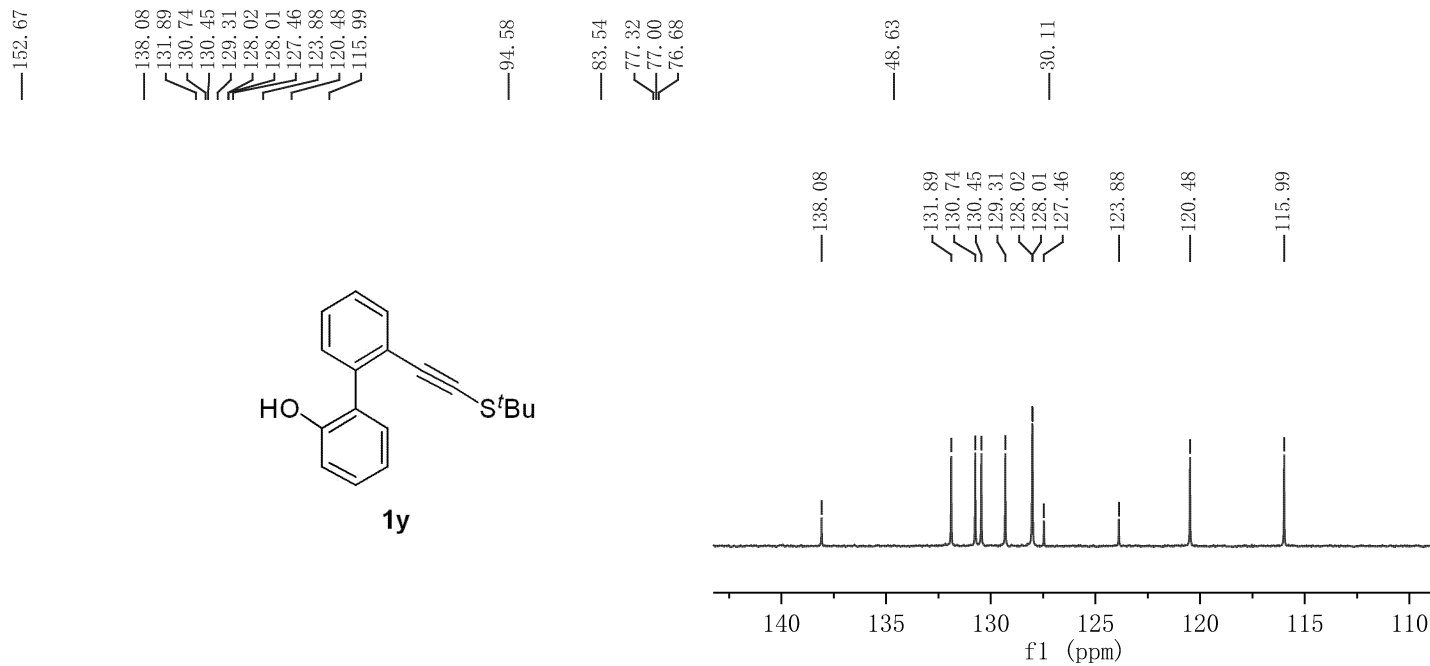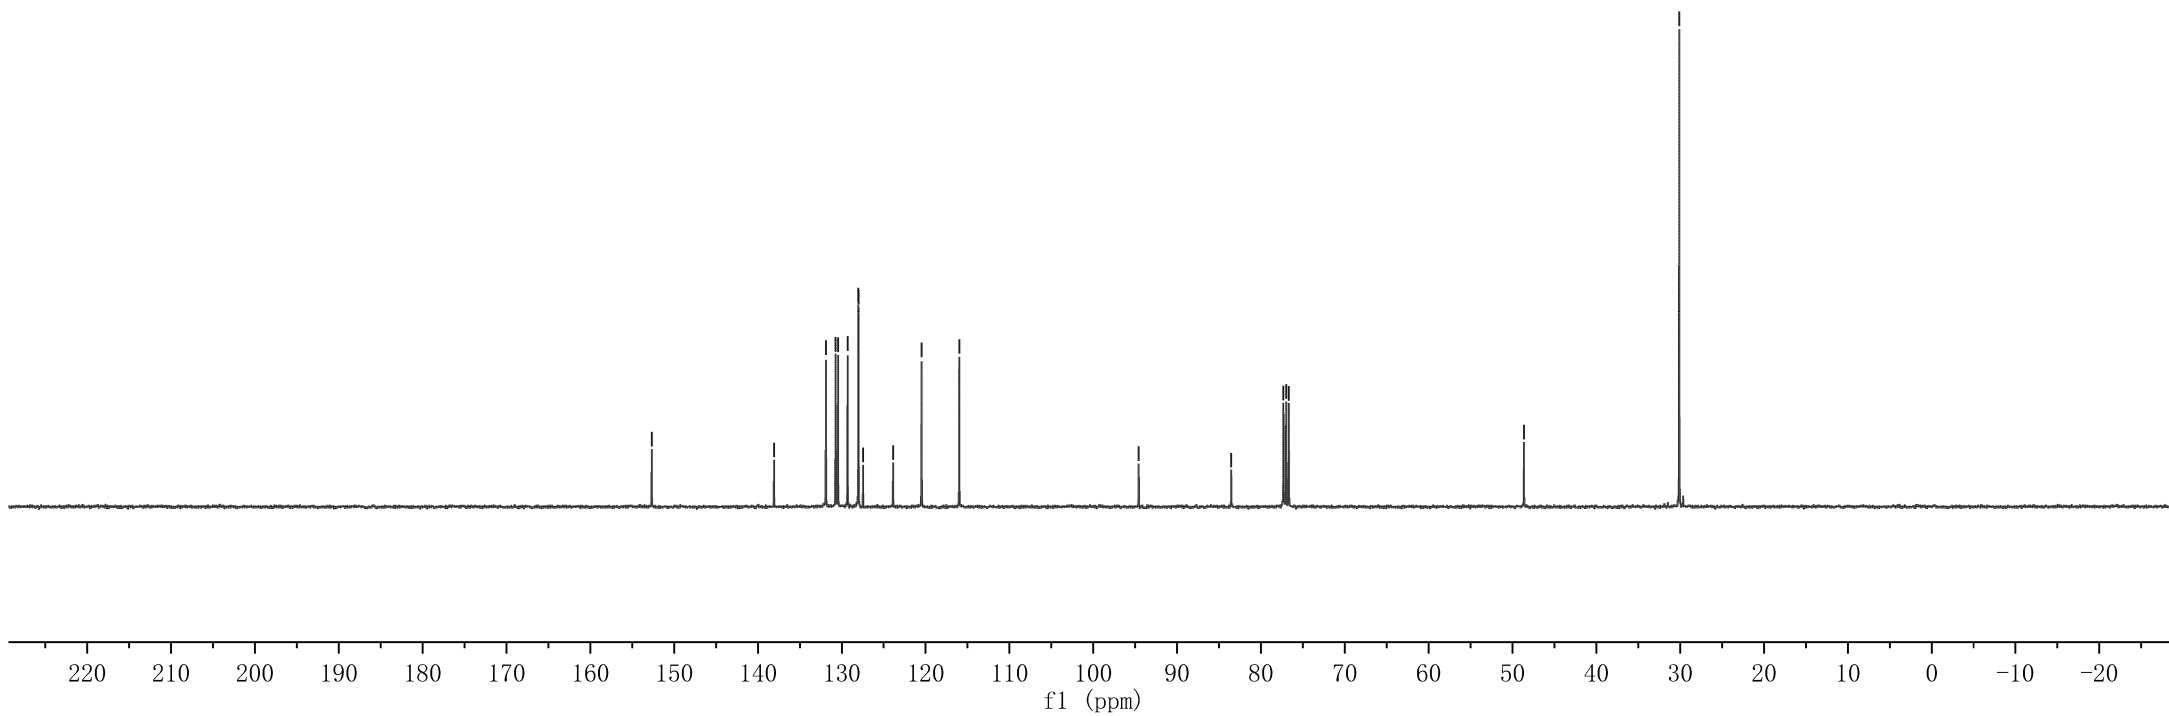

7.572  
7.569  
7.558  
7.552  
7.405  
7.384  
7.370  
7.346  
7.310  
7.286  
7.267  
7.247  
7.023  
7.021  
7.002  
6.981

3.058  
3.024  
2.991  
2.957

1.197  
1.180

| Parameter                | Value               |
|--------------------------|---------------------|
| 1 Title                  | FXY-13-182          |
| 2 Origin                 | Bruker BioSpin GmbH |
| 3 Solvent                | CDC13               |
| 4 Temperature            | 298.0               |
| 5 Number of Scans        | 5                   |
| 6 Acquisition Time       | 4.0894              |
| 7 Acquisition Date       | 2023-08-18T17:50:00 |
| 8 Spectrometer Frequency | 400.13              |
| 9 Spectral Width         | 8012.8              |

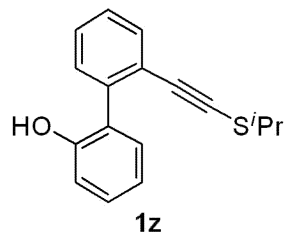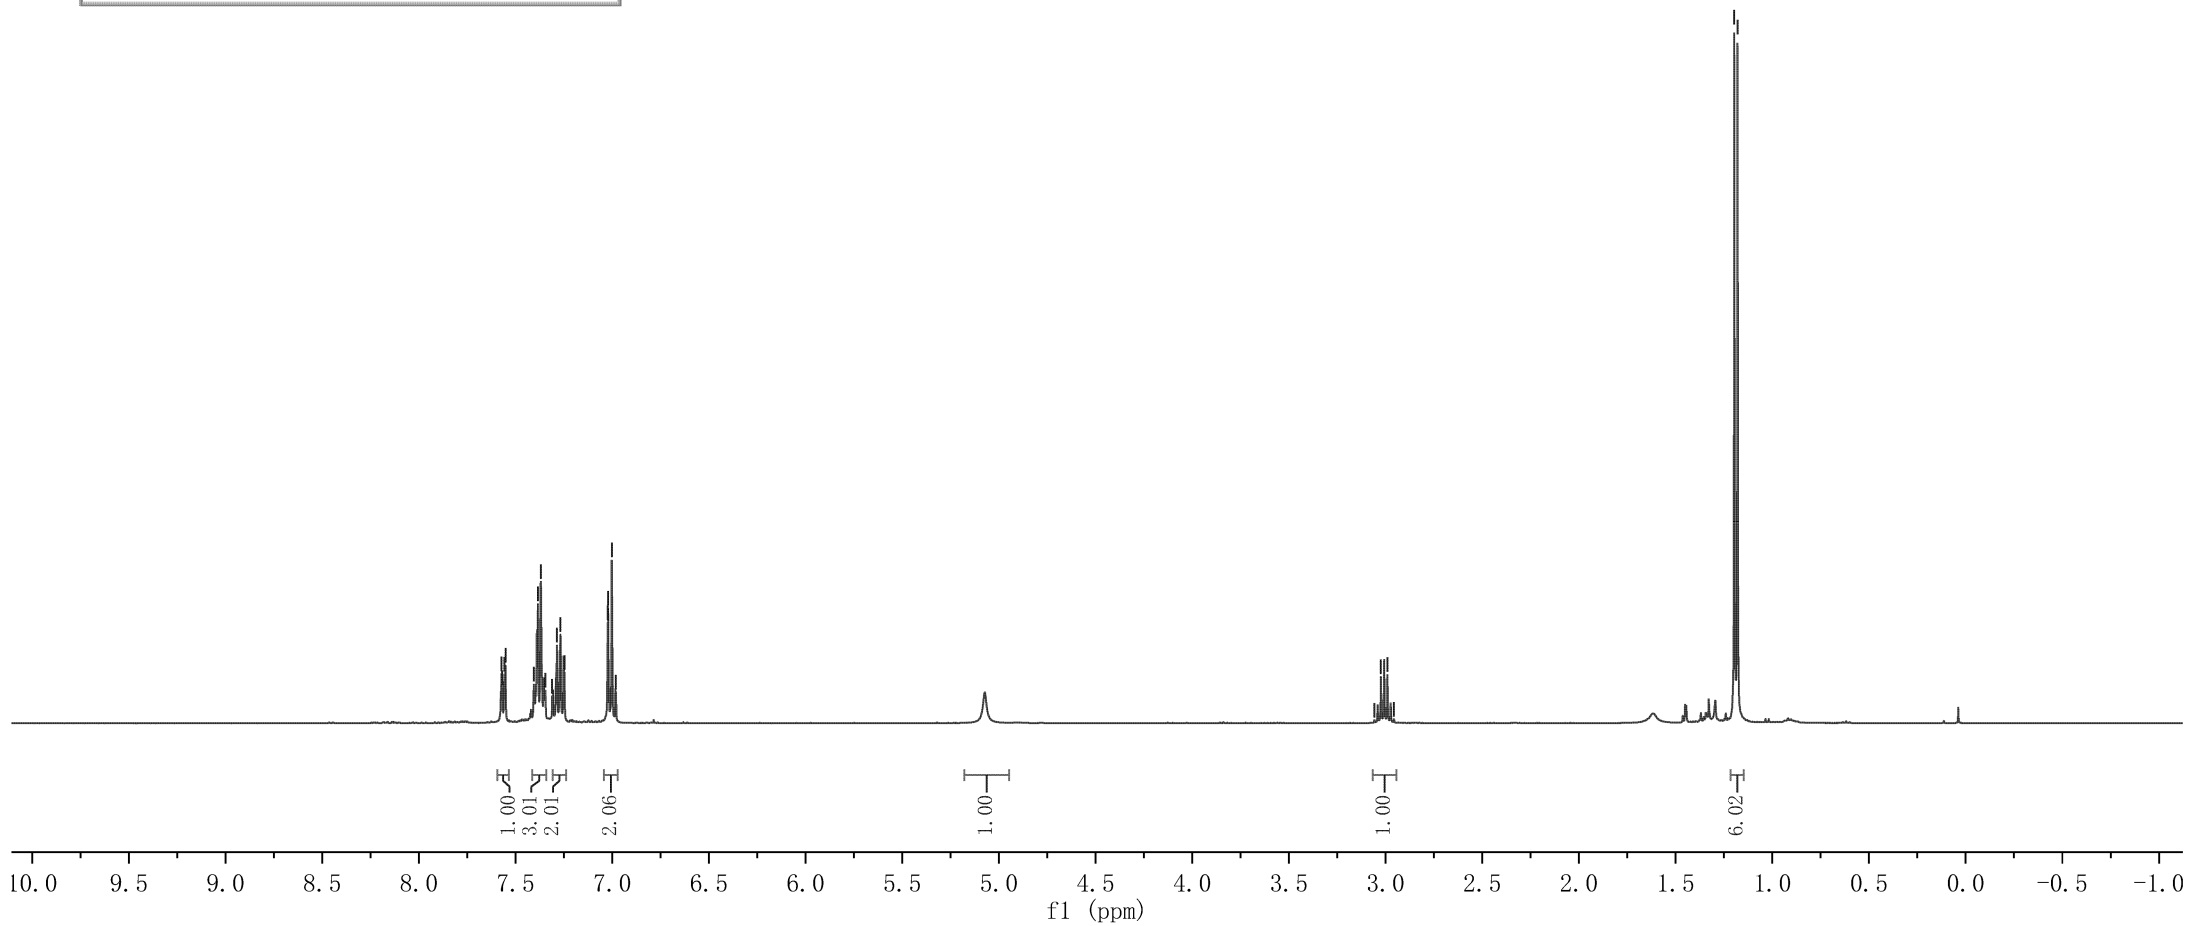



| Parameter                | Value               |
|--------------------------|---------------------|
| 1 Title                  | FXY-13-182-c        |
| 2 Origin                 | Bruker BioSpin GmbH |
| 3 Solvent                | CDC13               |
| 4 Temperature            | 300.0               |
| 5 Number of Scans        | 28                  |
| 6 Acquisition Time       | 1.3631              |
| 7 Acquisition Date       | 2023-08-18T17:51:34 |
| 8 Spectrometer Frequency | 100.61              |
| 9 Spectral Width         | 24038.5             |

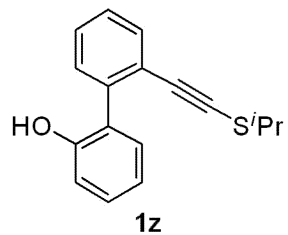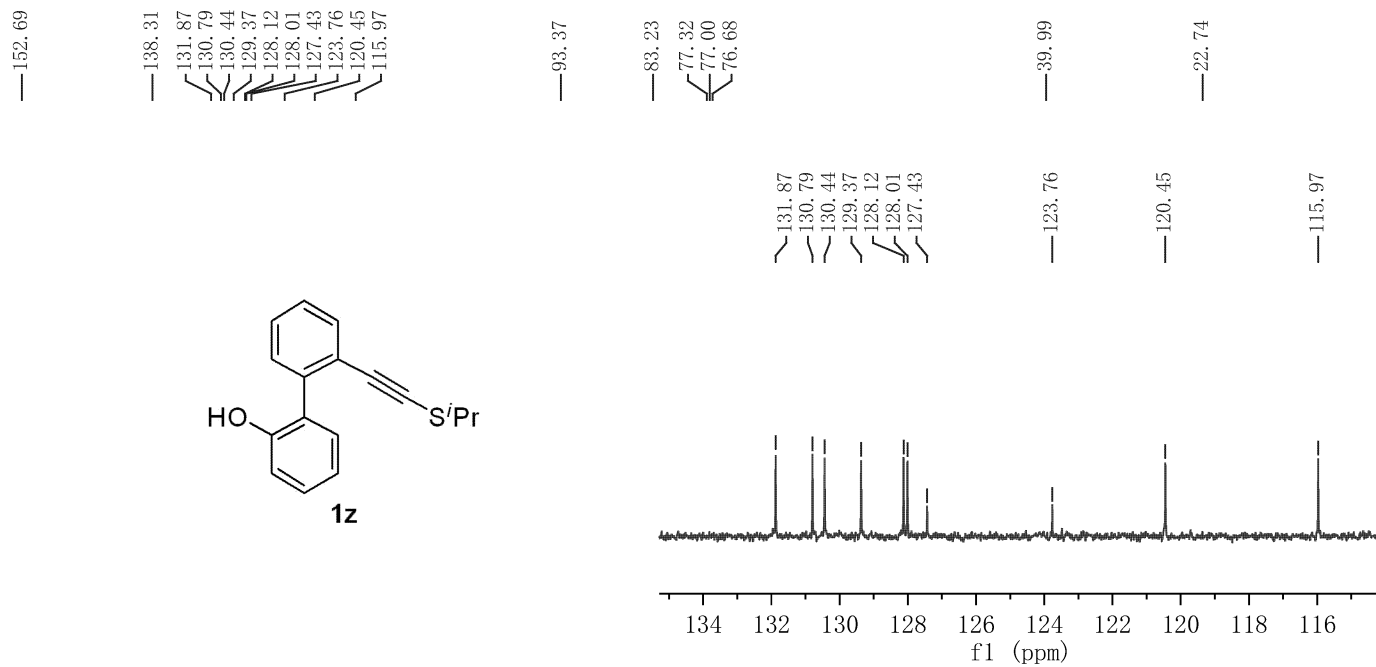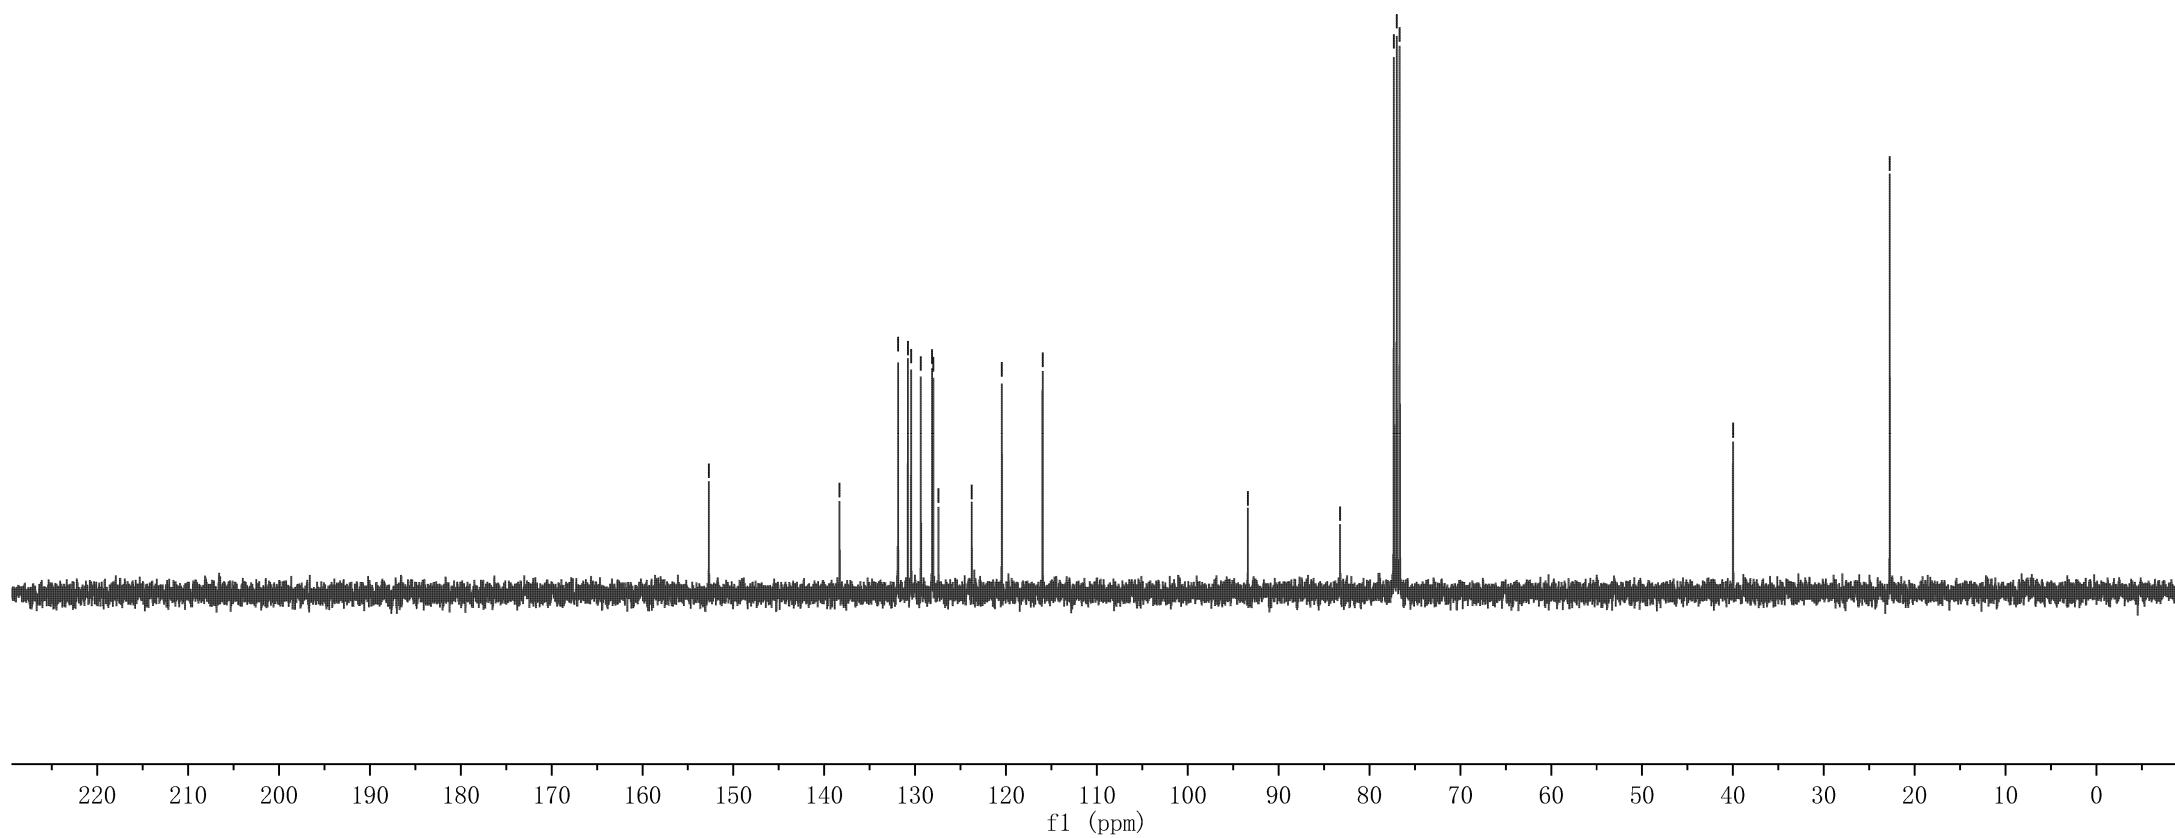

| Parameter                | Value               |
|--------------------------|---------------------|
| 1 Title                  | fxv-SCy-Sub         |
| 2 Origin                 | Bruker BioSpin GmbH |
| 3 Solvent                | CDC13               |
| 4 Temperature            | 298.0               |
| 5 Number of Scans        | 5                   |
| 6 Acquisition Time       | 4.0894              |
| 7 Acquisition Date       | 2023-08-20T12:09:08 |
| 8 Spectrometer Frequency | 400.13              |
| 9 Spectral Width         | 8012.8              |

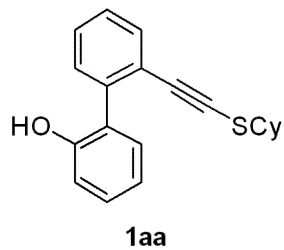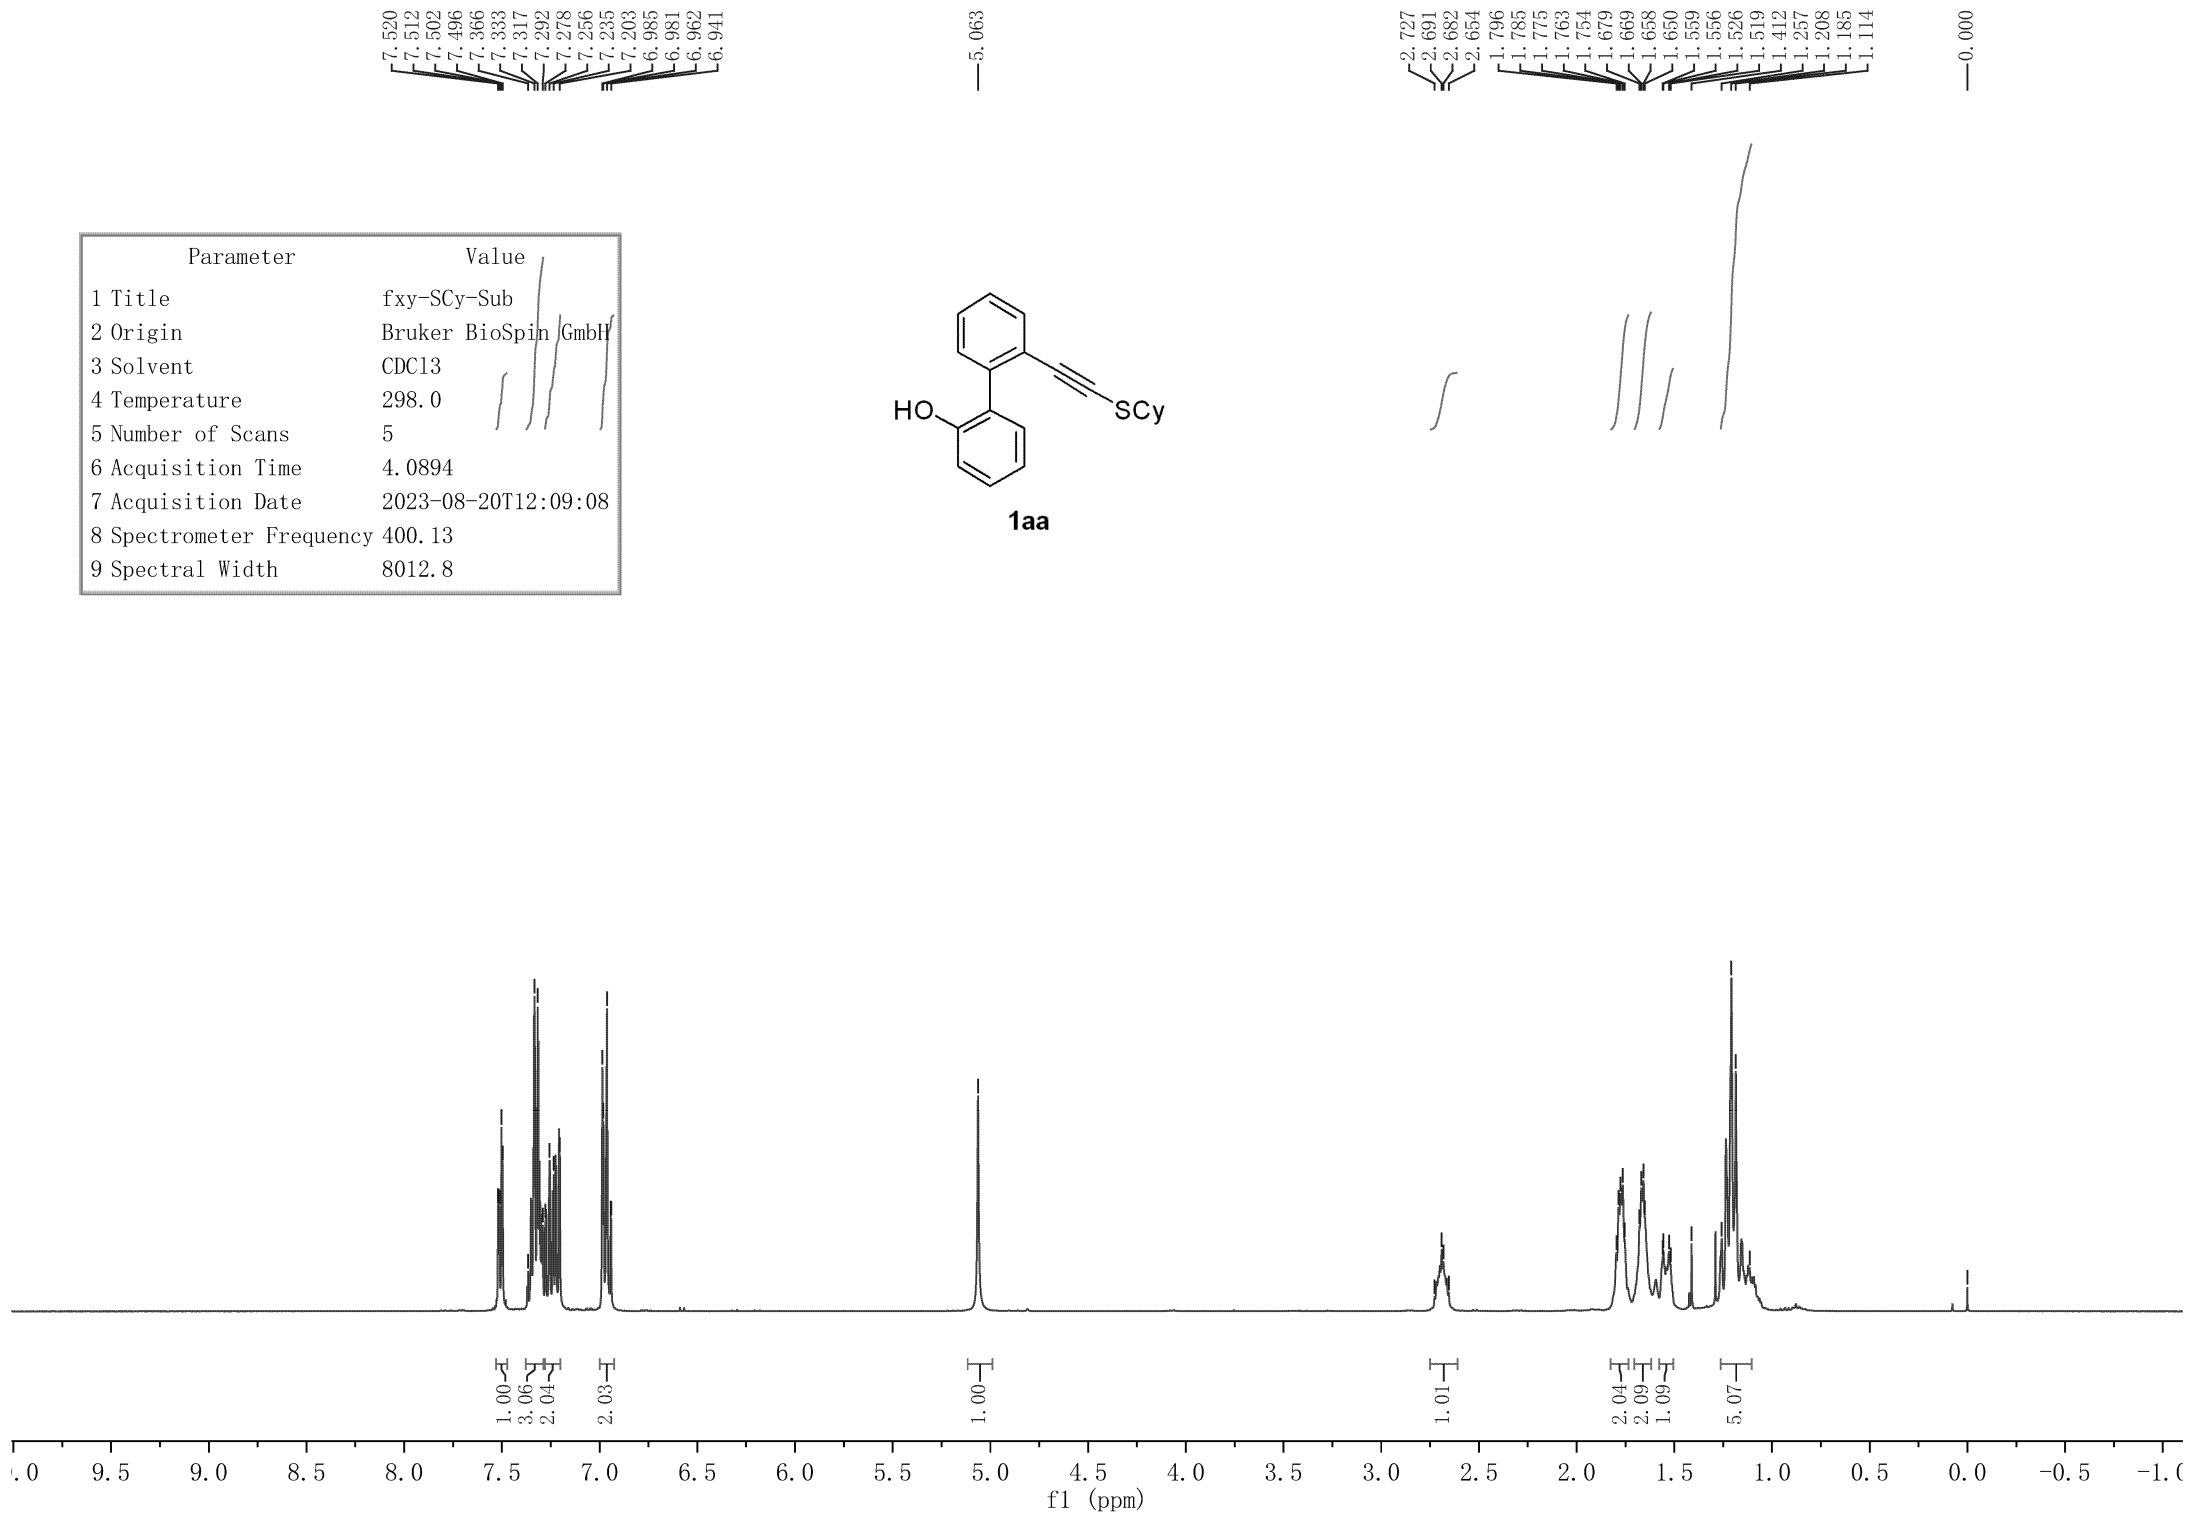

| Parameter                | Value               |
|--------------------------|---------------------|
| 1 Title                  | fxv-SCy-Sub-C       |
| 2 Origin                 | Bruker BioSpin GmbH |
| 3 Solvent                | CDC13               |
| 4 Temperature            | 300.0               |
| 5 Number of Scans        | 21                  |
| 6 Acquisition Time       | 1.3631              |
| 7 Acquisition Date       | 2023-08-20T12:10:03 |
| 8 Spectrometer Frequency | 100.61              |
| 9 Spectral Width         | 24038.5             |

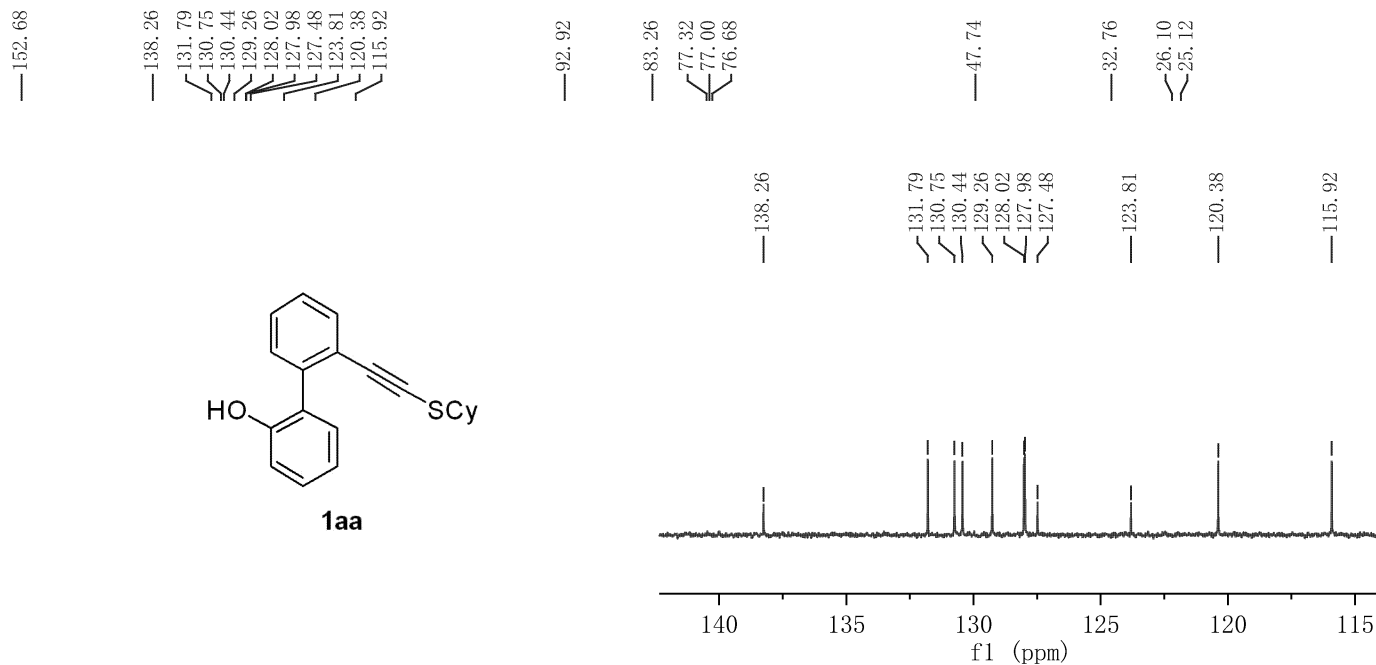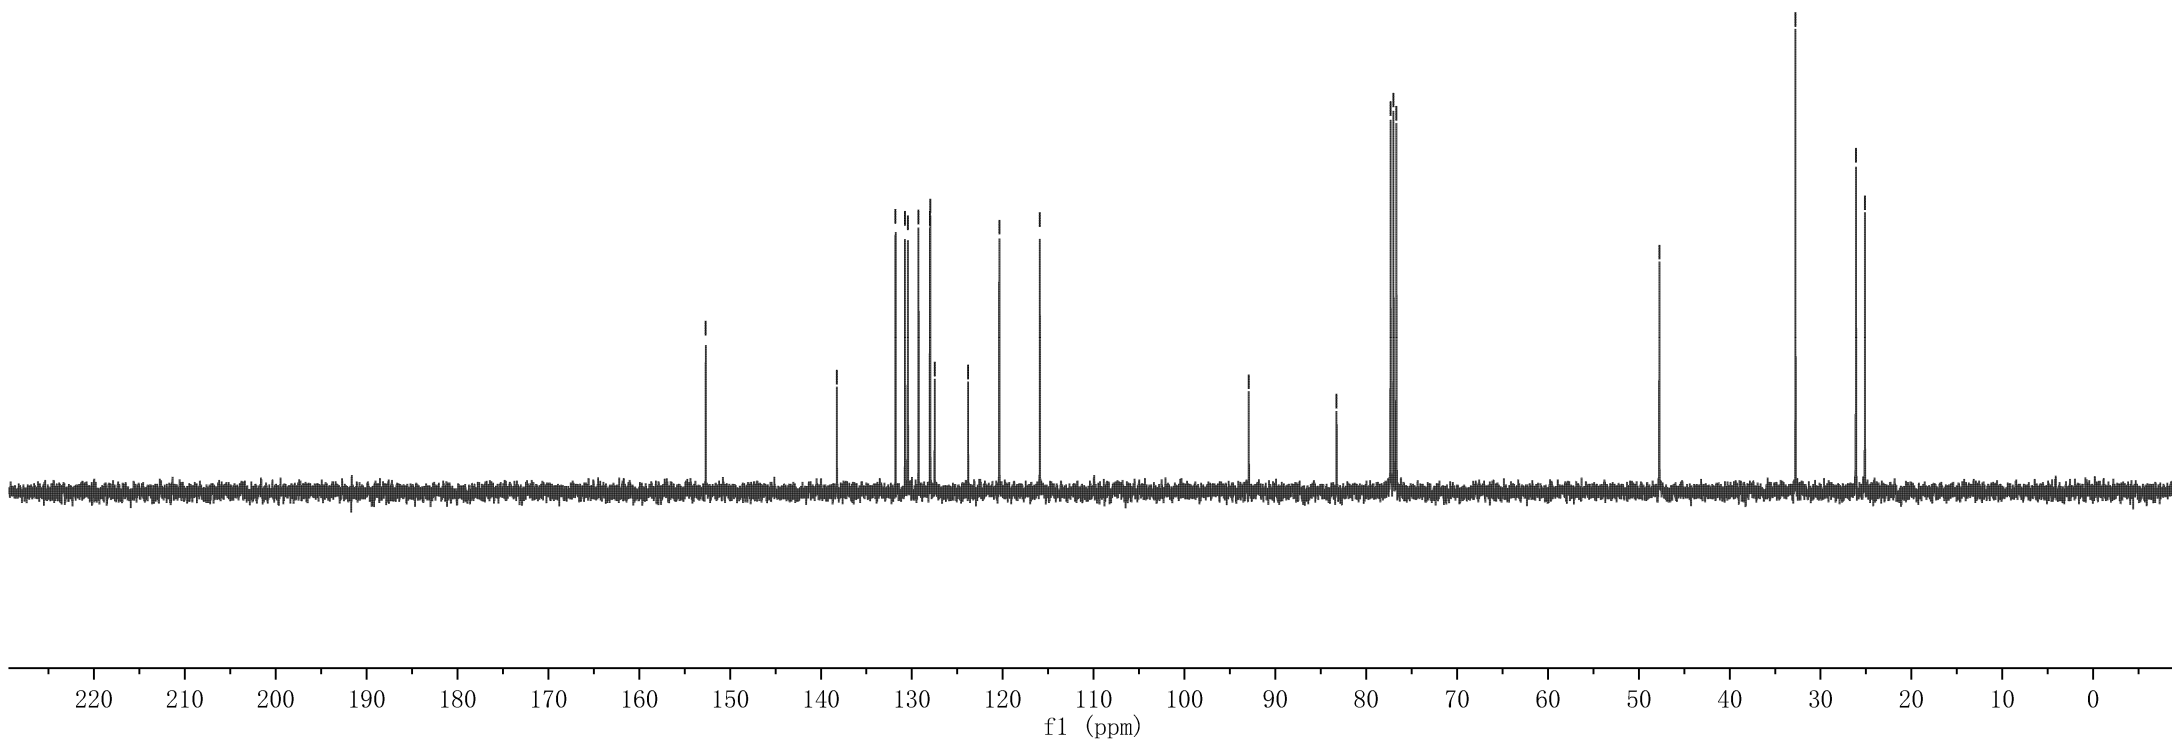

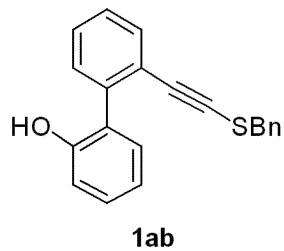

| Parameter                | Value               |
|--------------------------|---------------------|
| 1 Title                  | FXY-1z              |
| 2 Origin                 |                     |
| 3 Solvent                | CDC13               |
| 4 Temperature            | 300.5               |
| 5 Number of Scans        | 100                 |
| 6 Acquisition Time       | 1.0000              |
| 7 Acquisition Date       | 2023-08-10T22:55:38 |
| 8 Spectrometer Frequency | 100.56              |
| 9 Spectral Width         | 26041.0             |

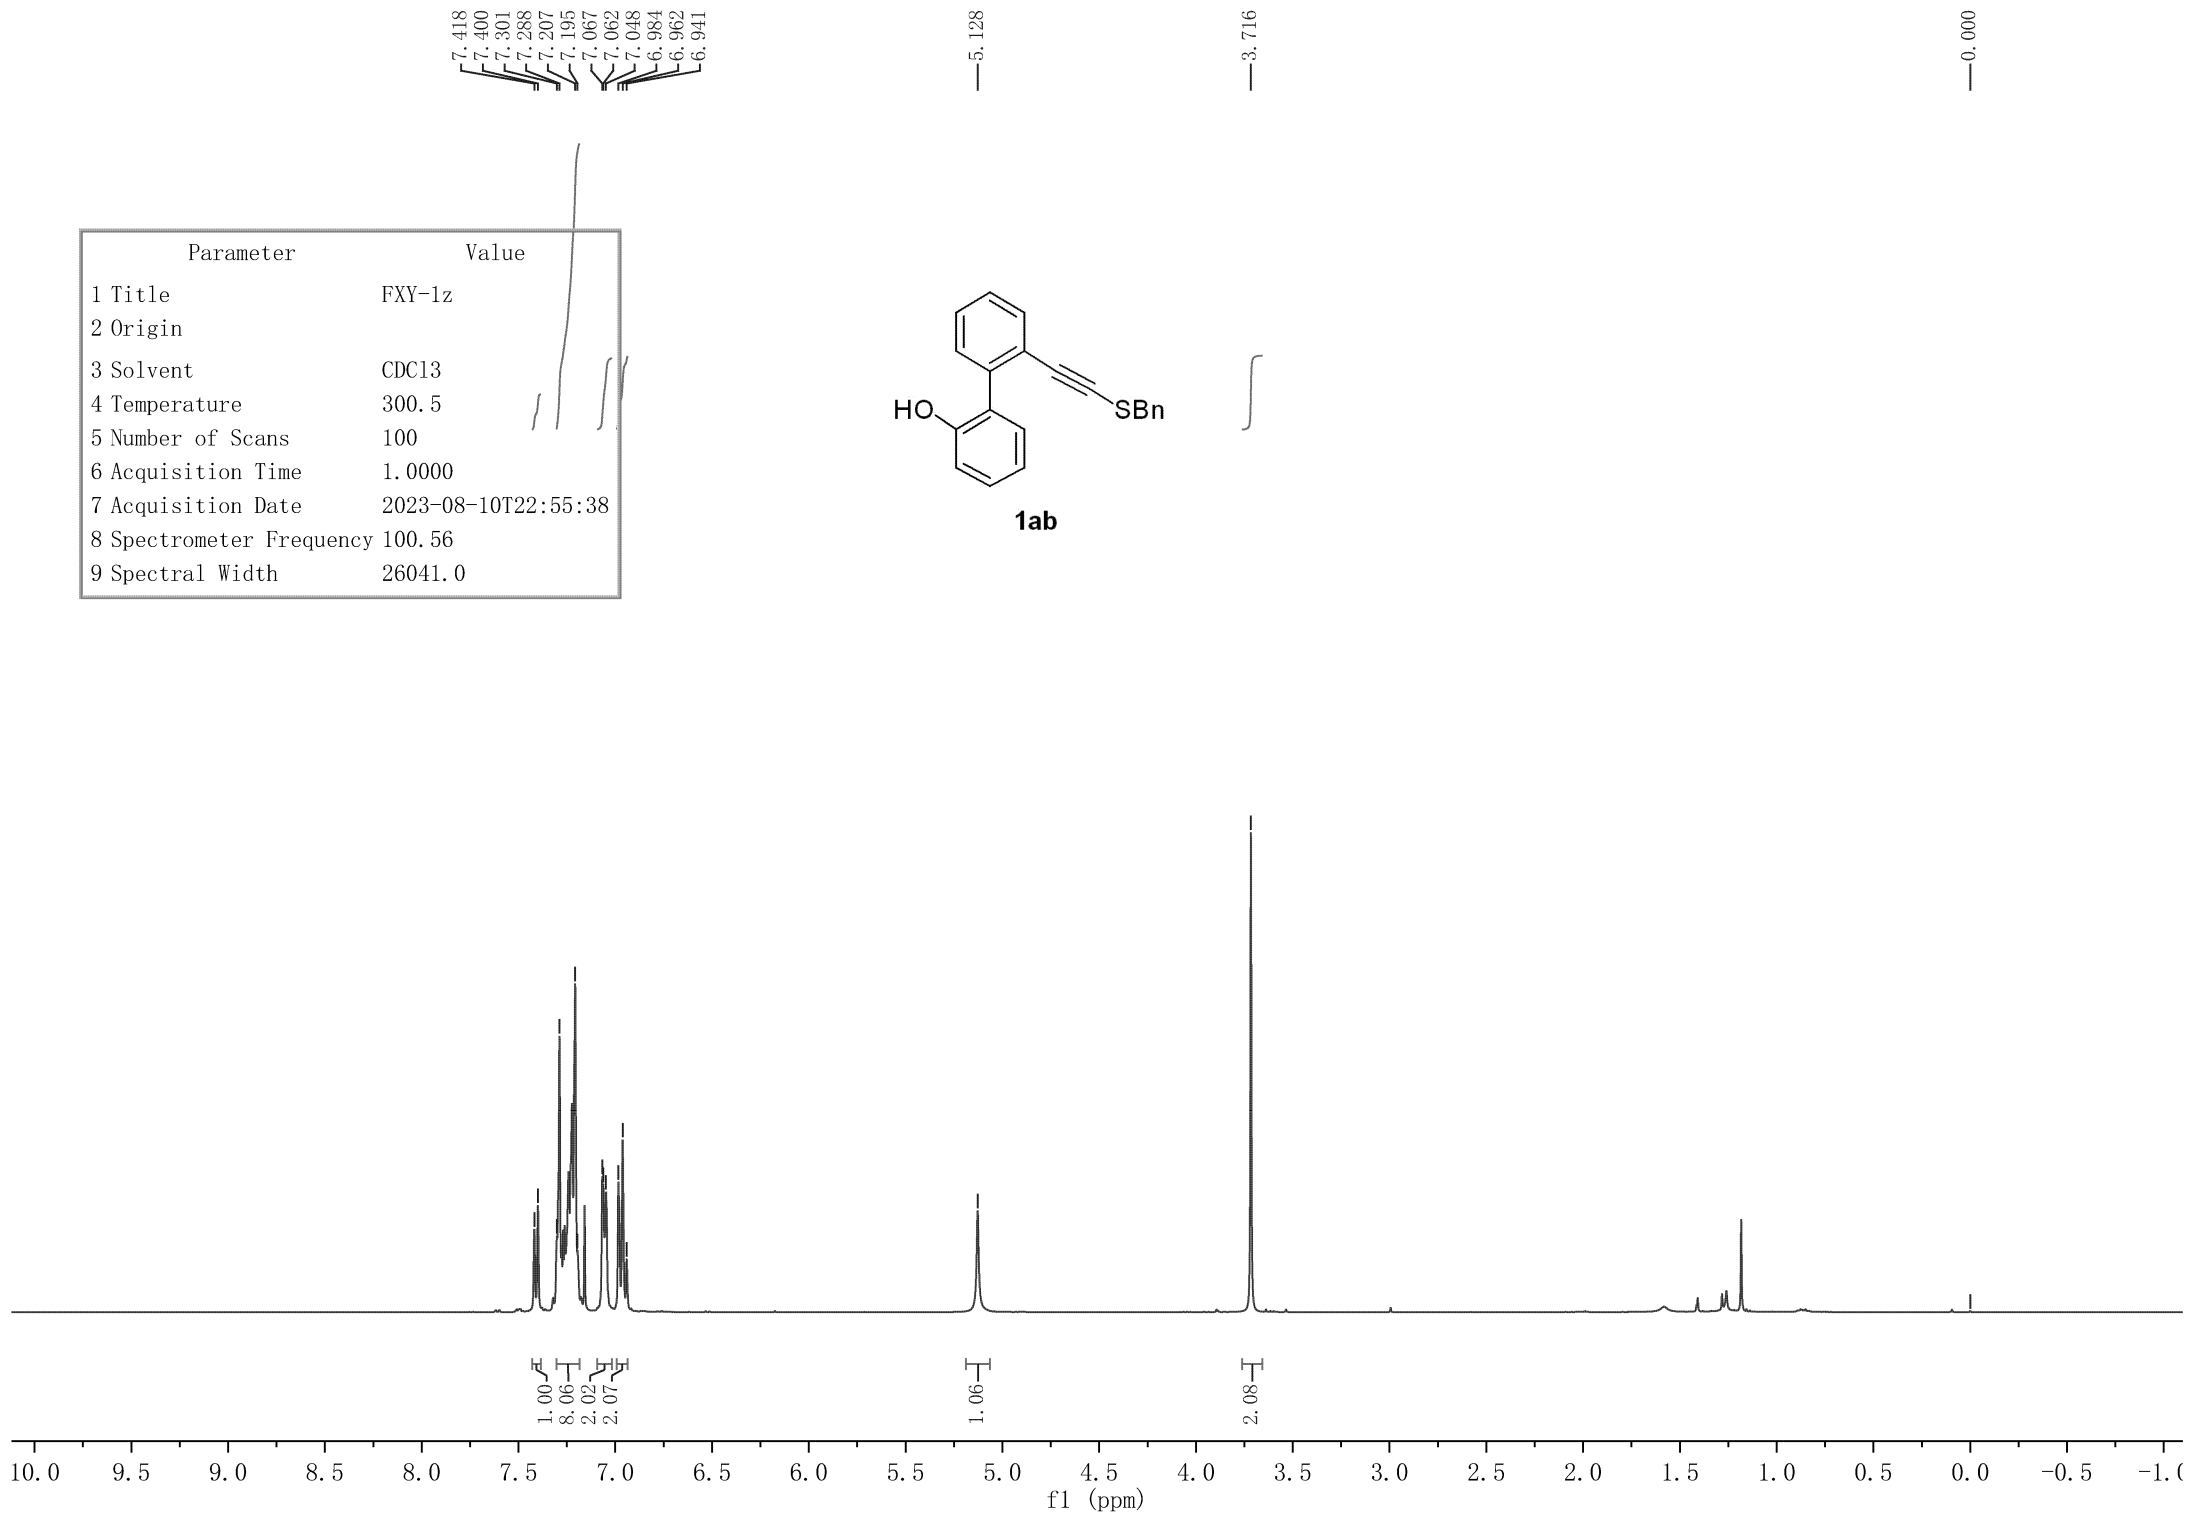

| Parameter                | Value               |
|--------------------------|---------------------|
| 1 Title                  | FXY-1z              |
| 2 Origin                 |                     |
| 3 Solvent                | CDC13               |
| 4 Temperature            | 300.5               |
| 5 Number of Scans        | 100                 |
| 6 Acquisition Time       | 1.0000              |
| 7 Acquisition Date       | 2023-08-10T22:55:38 |
| 8 Spectrometer Frequency | 100.56              |
| 9 Spectral Width         | 26041.0             |



152.61  
138.38  
136.48  
131.88  
130.88  
130.32  
129.46  
128.79  
128.44  
128.19  
127.82  
127.54  
127.25  
123.29  
120.35  
115.97

93.12

83.85

77.32

77.00

76.68

40.34

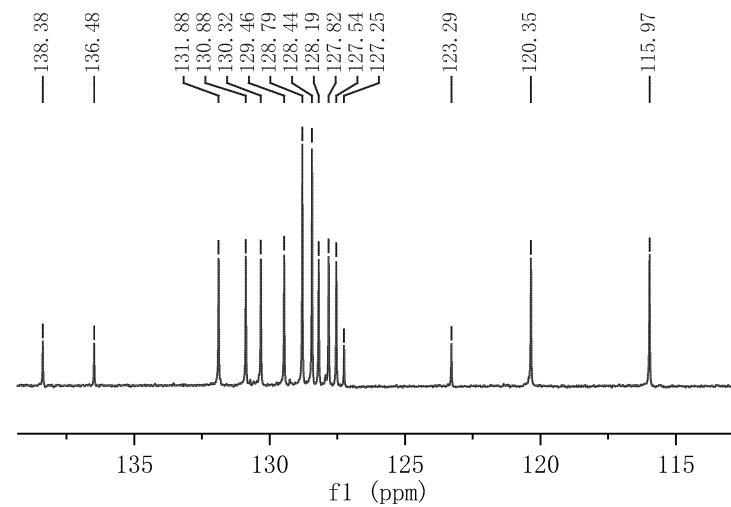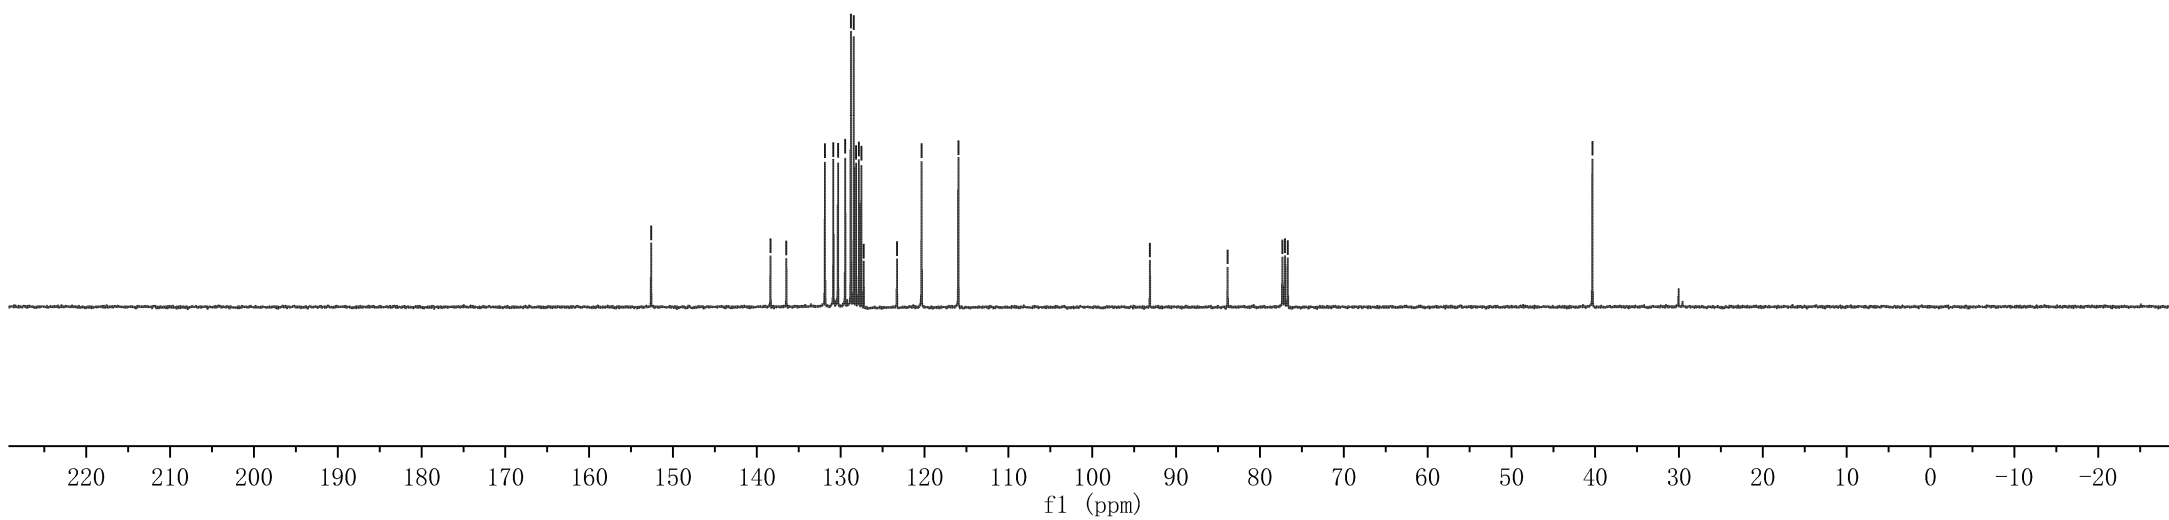

7.604  
7.585  
7.426  
7.411  
7.368  
7.347  
7.329  
7.311  
7.288  
7.266  
7.204  
7.167  
7.154  
7.137  
7.045  
7.026  
7.003  
6.988

5.016

0.000

| Parameter                | Value               |
|--------------------------|---------------------|
| 1 Title                  | FXY-13-206-H        |
| 2 Origin                 |                     |
| 3 Solvent                | CDC13               |
| 4 Temperature            | 299.1               |
| 5 Number of Scans        | 16                  |
| 6 Acquisition Time       | 4.0002              |
| 7 Acquisition Date       | 2023-08-22T18:01:51 |
| 8 Spectrometer Frequency | 399.90              |
| 9 Spectral Width         | 8012.0              |

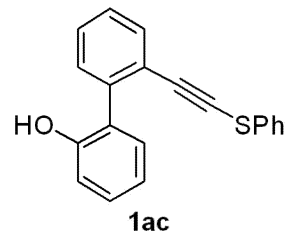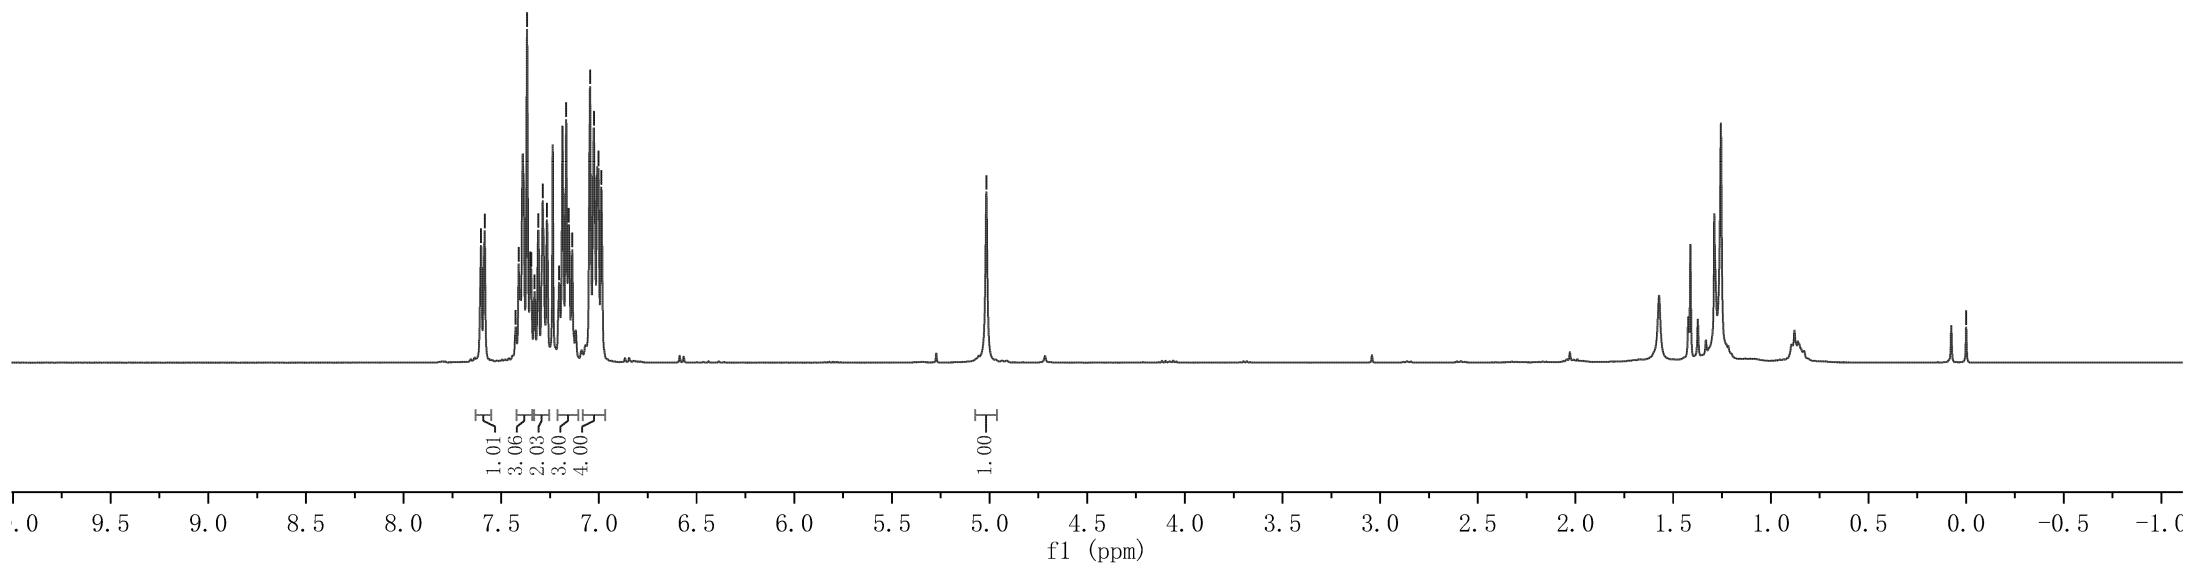

| Parameter                | Value               |
|--------------------------|---------------------|
| 1 Title                  | FXY-13-206-C        |
| 2 Origin                 |                     |
| 3 Solvent                | CDC13               |
| 4 Temperature            | 299.2               |
| 5 Number of Scans        | 1024                |
| 6 Acquisition Time       | 1.0000              |
| 7 Acquisition Date       | 2023-08-22T18:38:36 |
| 8 Spectrometer Frequency | 100.56              |
| 9 Spectral Width         | 26041.0             |

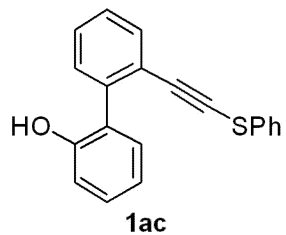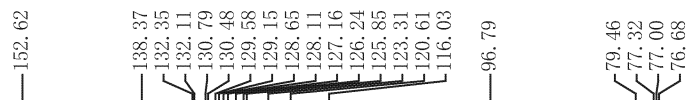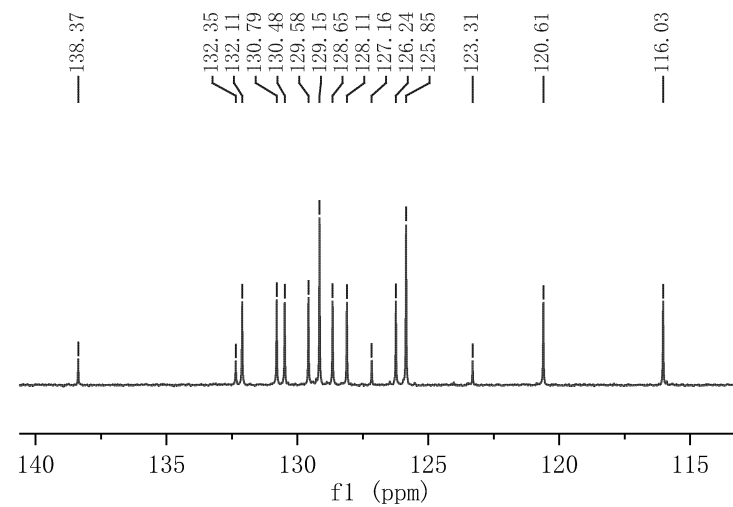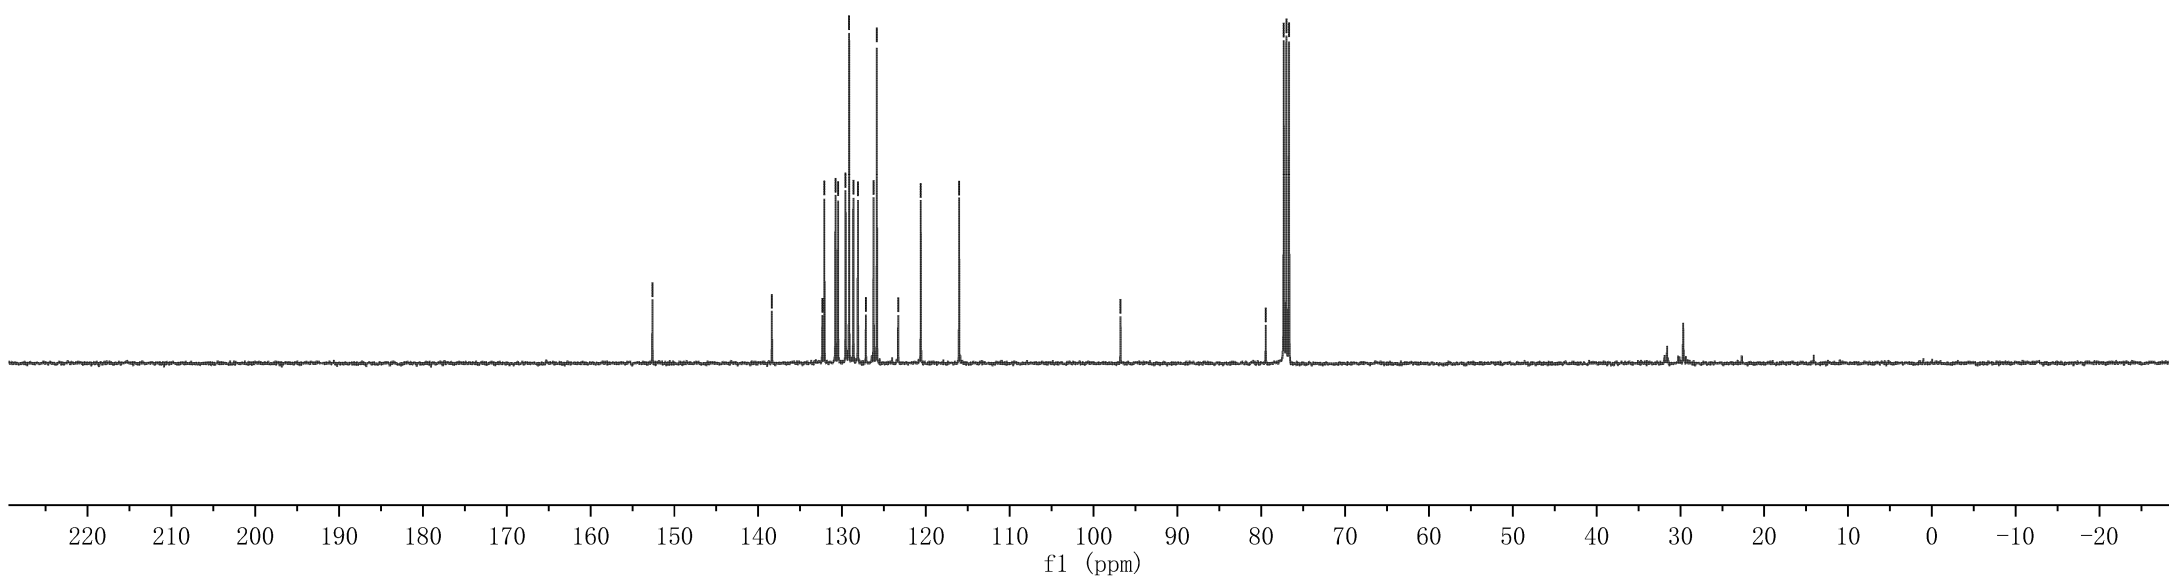

| Parameter                | Value               |
|--------------------------|---------------------|
| 1 Title                  | fxv-13-2a           |
| 2 Origin                 | Bruker BioSpin GmbH |
| 3 Solvent                | CDC13               |
| 4 Temperature            | 298.0               |
| 5 Number of Scans        | 3                   |
| 6 Acquisition Time       | 4.0894              |
| 7 Acquisition Date       | 2023-08-21T10:29:22 |
| 8 Spectrometer Frequency | 400.13              |
| 9 Spectral Width         | 8012.8              |

7.278  
7.241  
7.231  
7.177  
7.076  
7.058  
7.040  
7.036  
7.017  
7.008  
6.990  
6.989  
6.473  
6.472  
6.458  
6.218  
6.193  
5.949  
5.942  
5.926  
5.919

2.063  
2.009  
1.975  
1.692  
1.685  
1.679

0.000

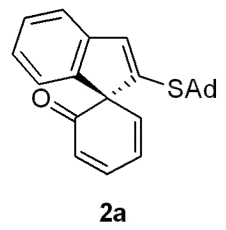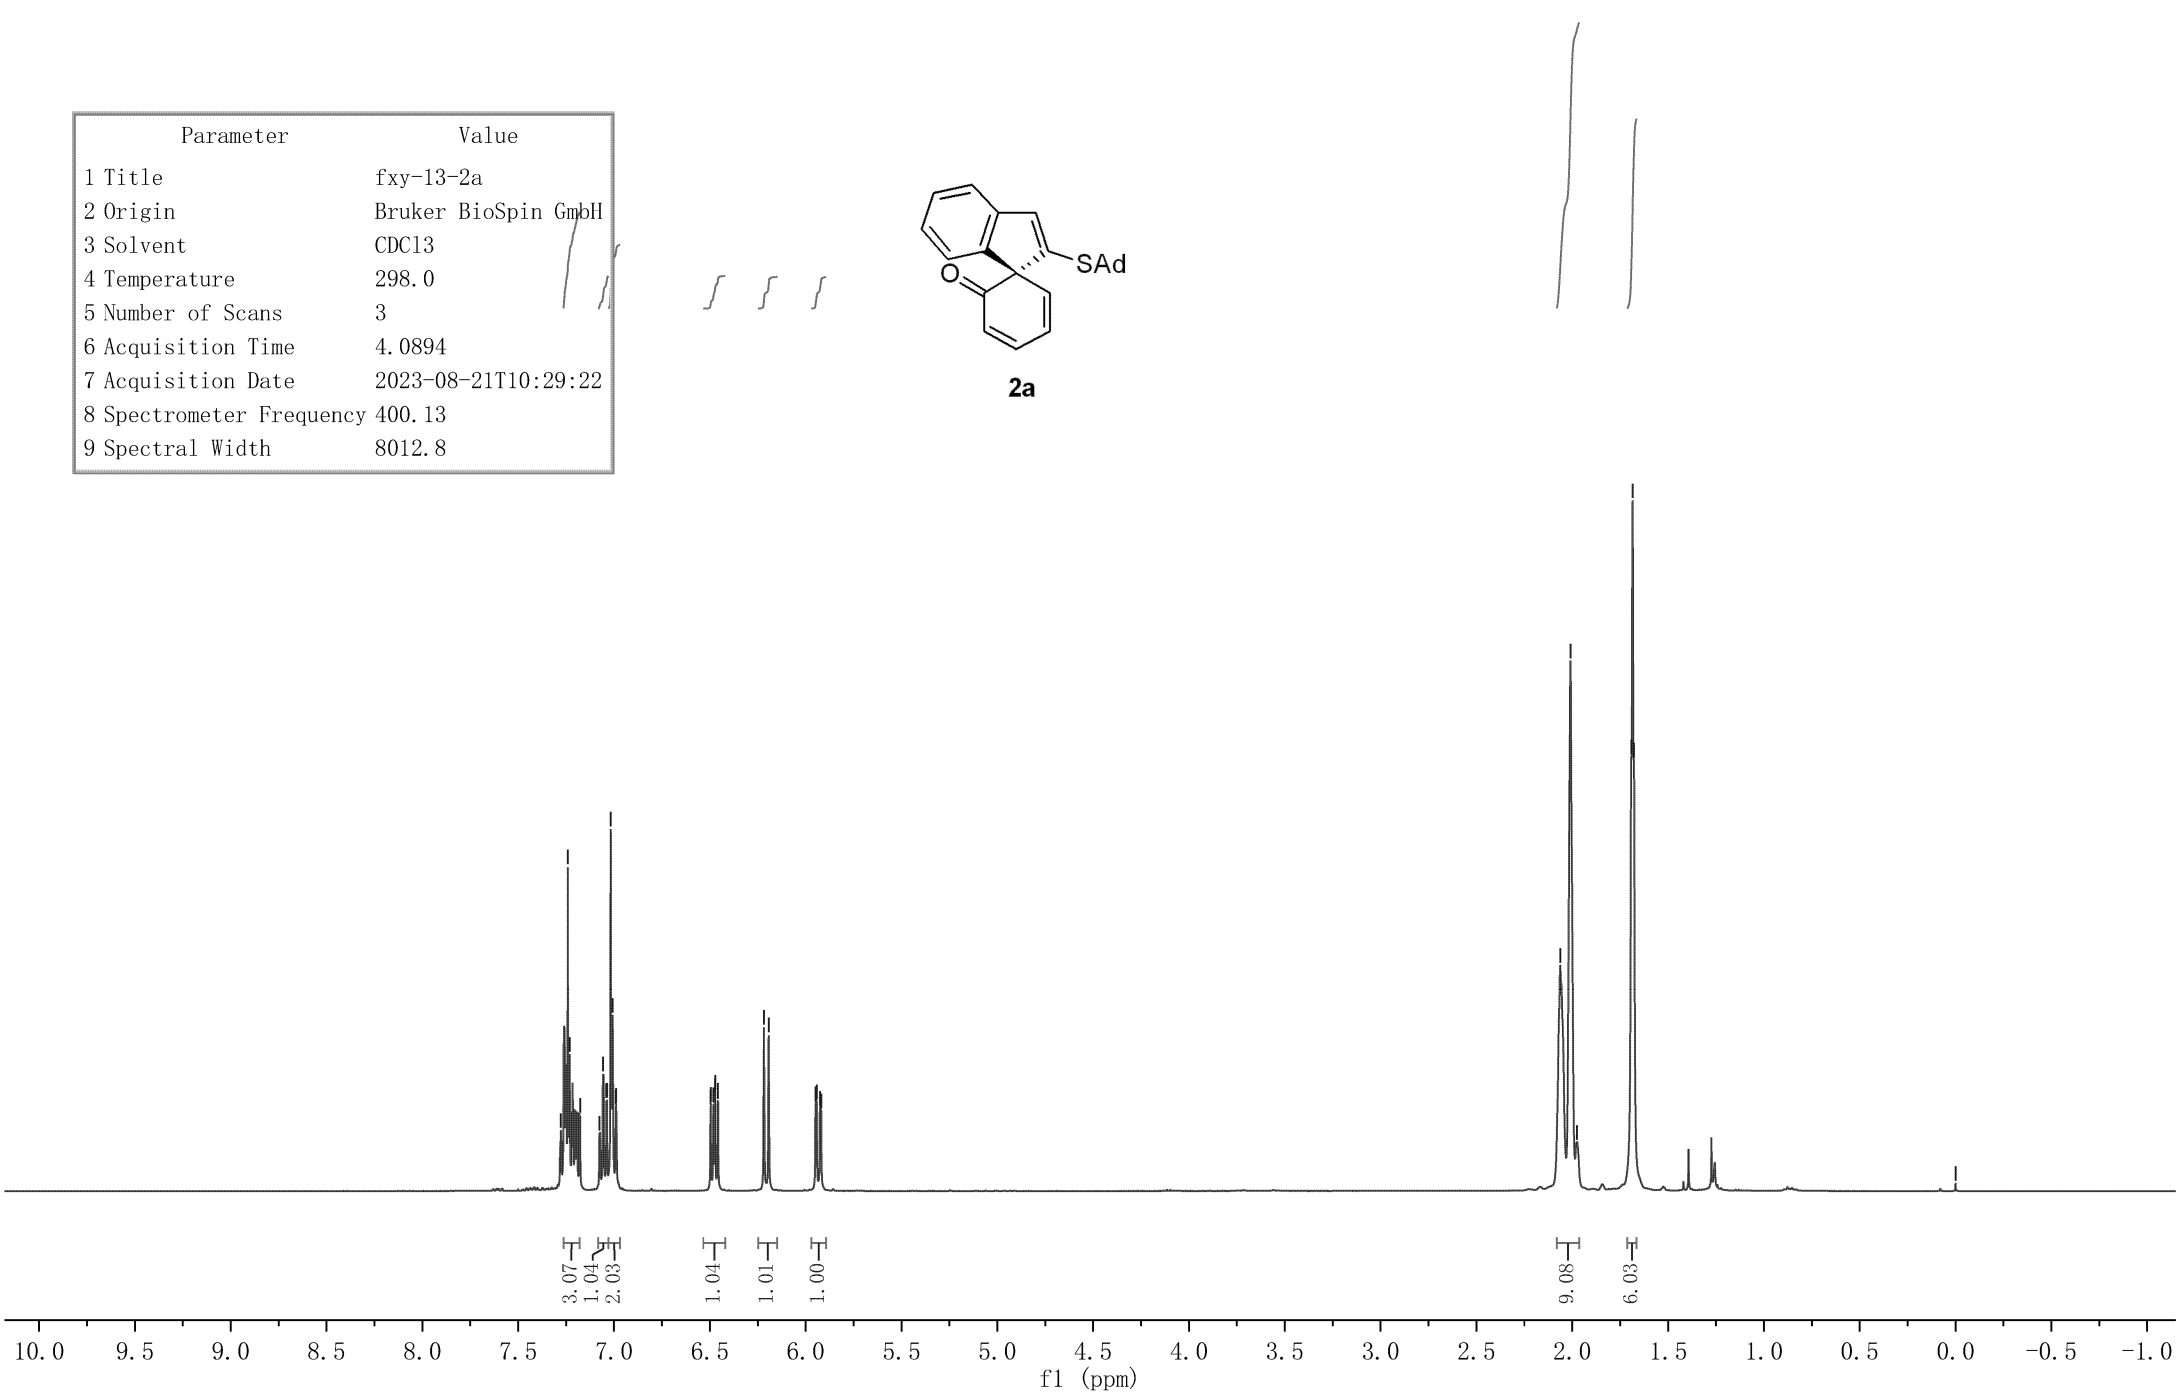



| Parameter                | Value               |
|--------------------------|---------------------|
| 1 Title                  | fxv-13-2a-C         |
| 2 Origin                 | Bruker BioSpin GmbH |
| 3 Solvent                | CDC13               |
| 4 Temperature            | 300.0               |
| 5 Number of Scans        | 6                   |
| 6 Acquisition Time       | 1.3631              |
| 7 Acquisition Date       | 2023-08-21T10:30:23 |
| 8 Spectrometer Frequency | 100.61              |
| 9 Spectral Width         | 24038.5             |

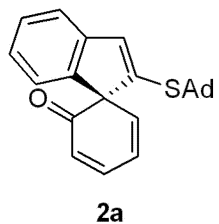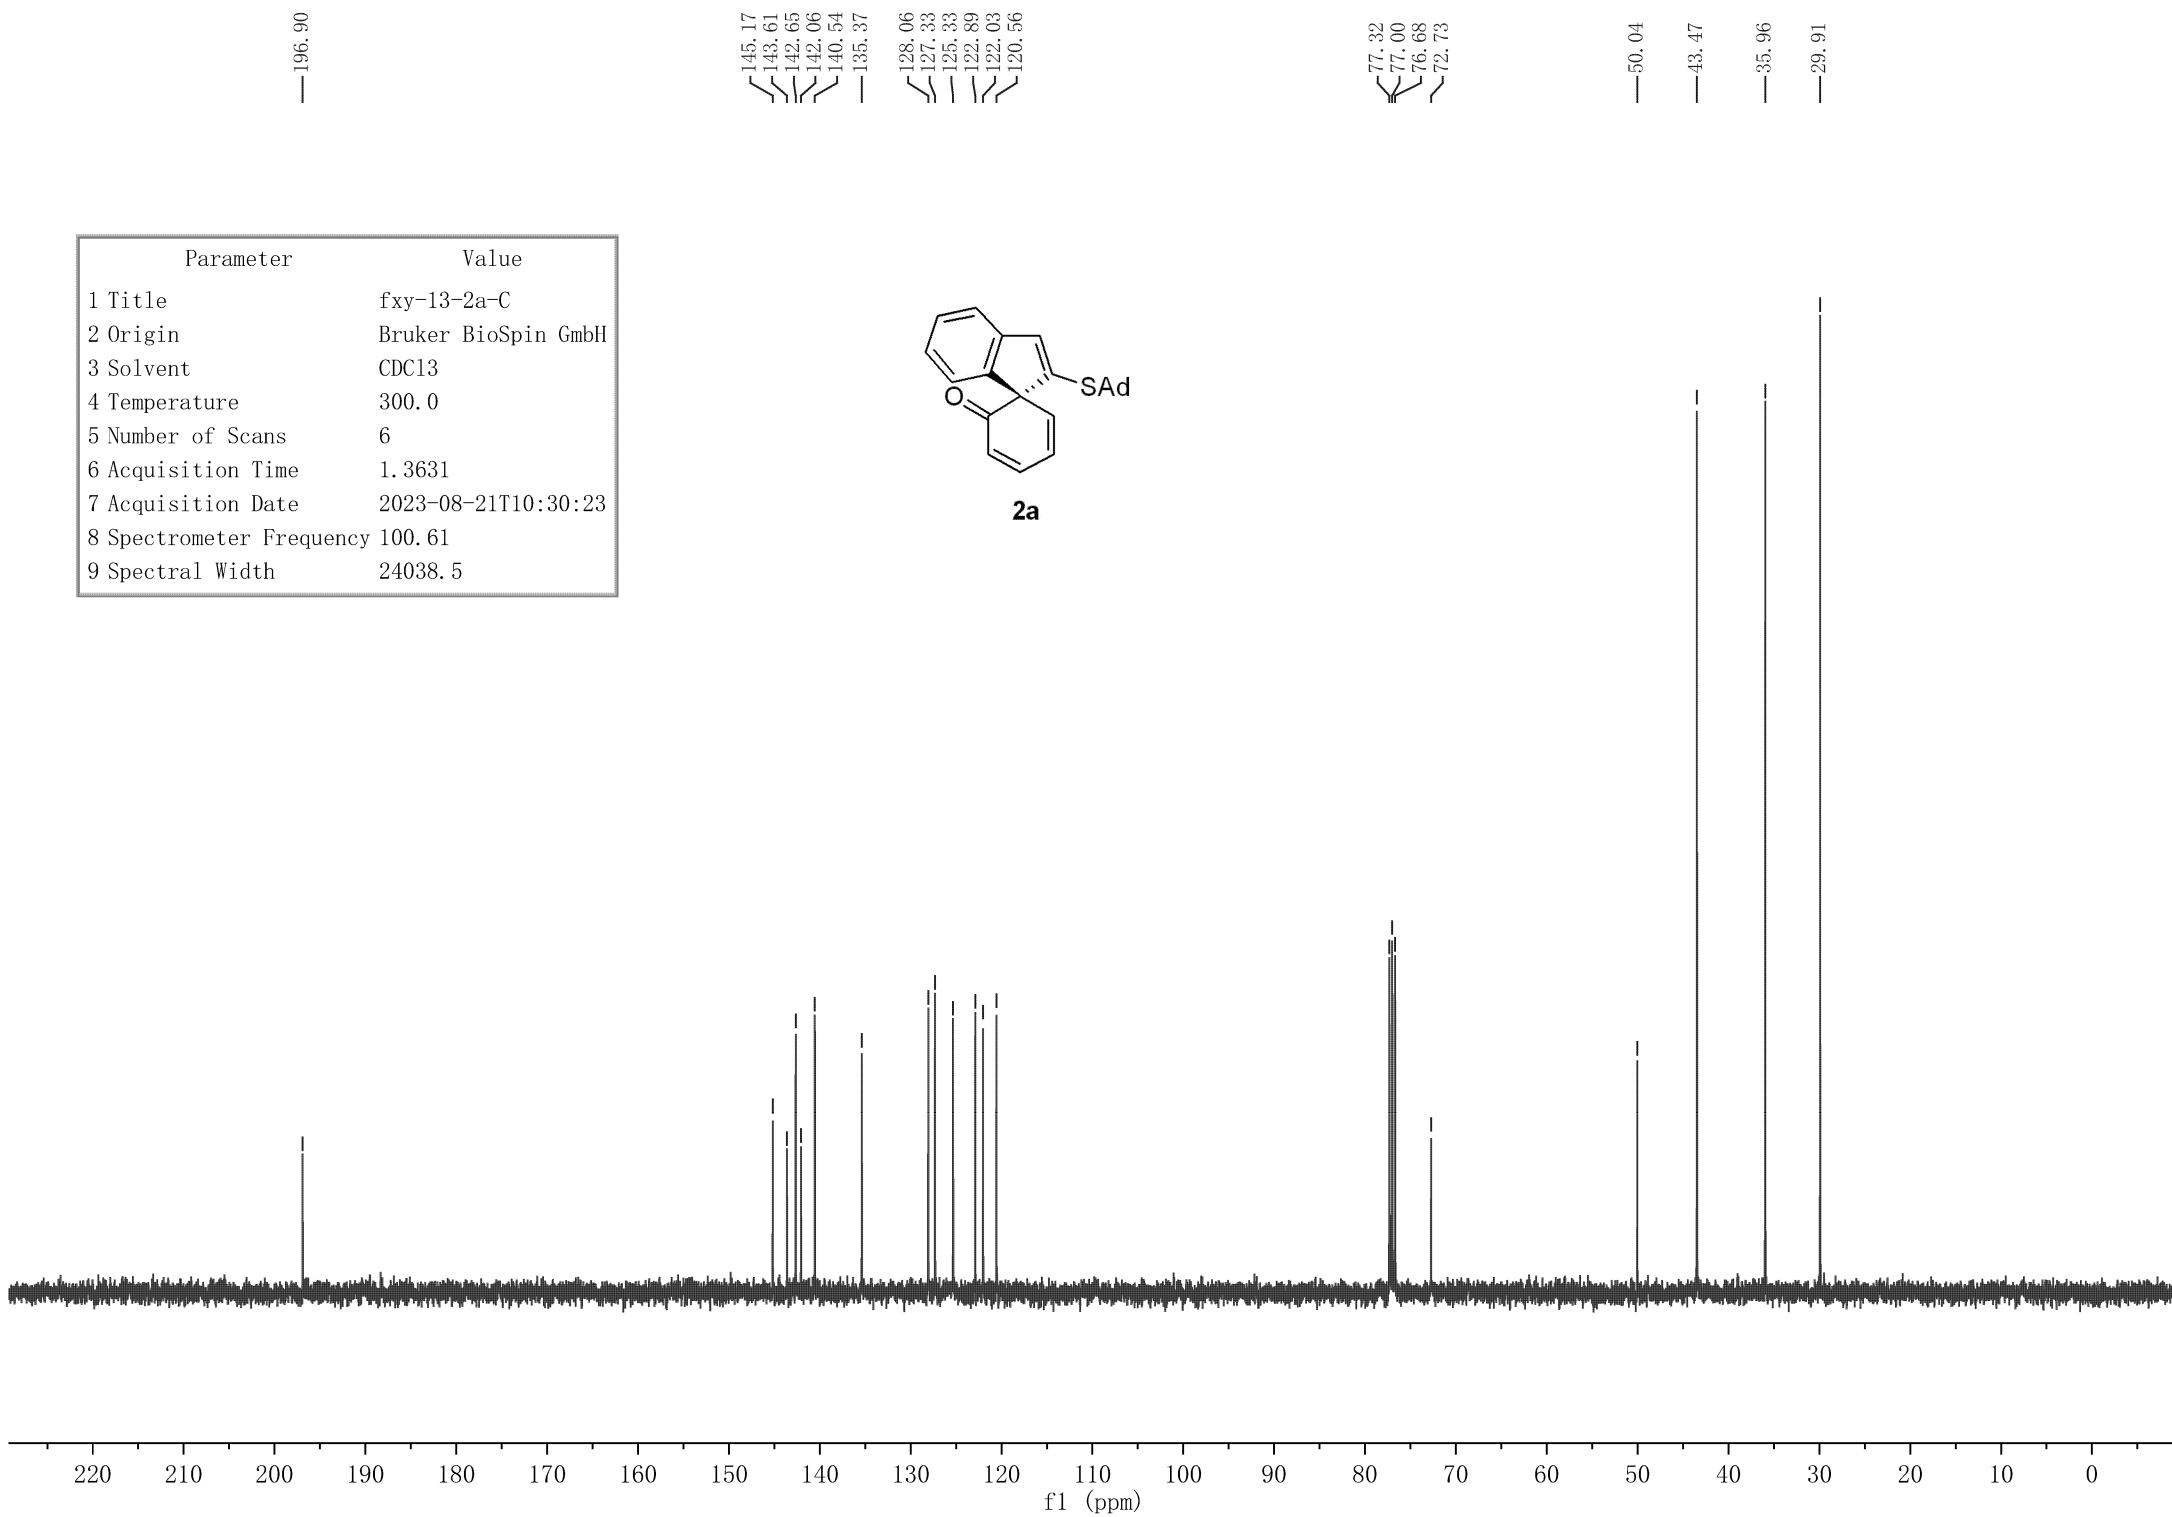

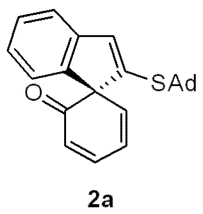

142.64  
140.53  
135.37  
128.05  
127.32  
125.33  
122.88  
122.02  
120.55

43.47  
35.95  
29.91

| Parameter                | Value               |
|--------------------------|---------------------|
| 1 Title                  | fxv-13-2a-dept      |
| 2 Origin                 | Bruker BioSpin GmbH |
| 3 Solvent                | CDC13               |
| 4 Temperature            | 300.0               |
| 5 Number of Scans        | 4                   |
| 6 Acquisition Time       | 1.3631              |
| 7 Acquisition Date       | 2023-08-21T10:31:16 |
| 8 Spectrometer Frequency | 100.61              |
| 9 Spectral Width         | 24038.5             |

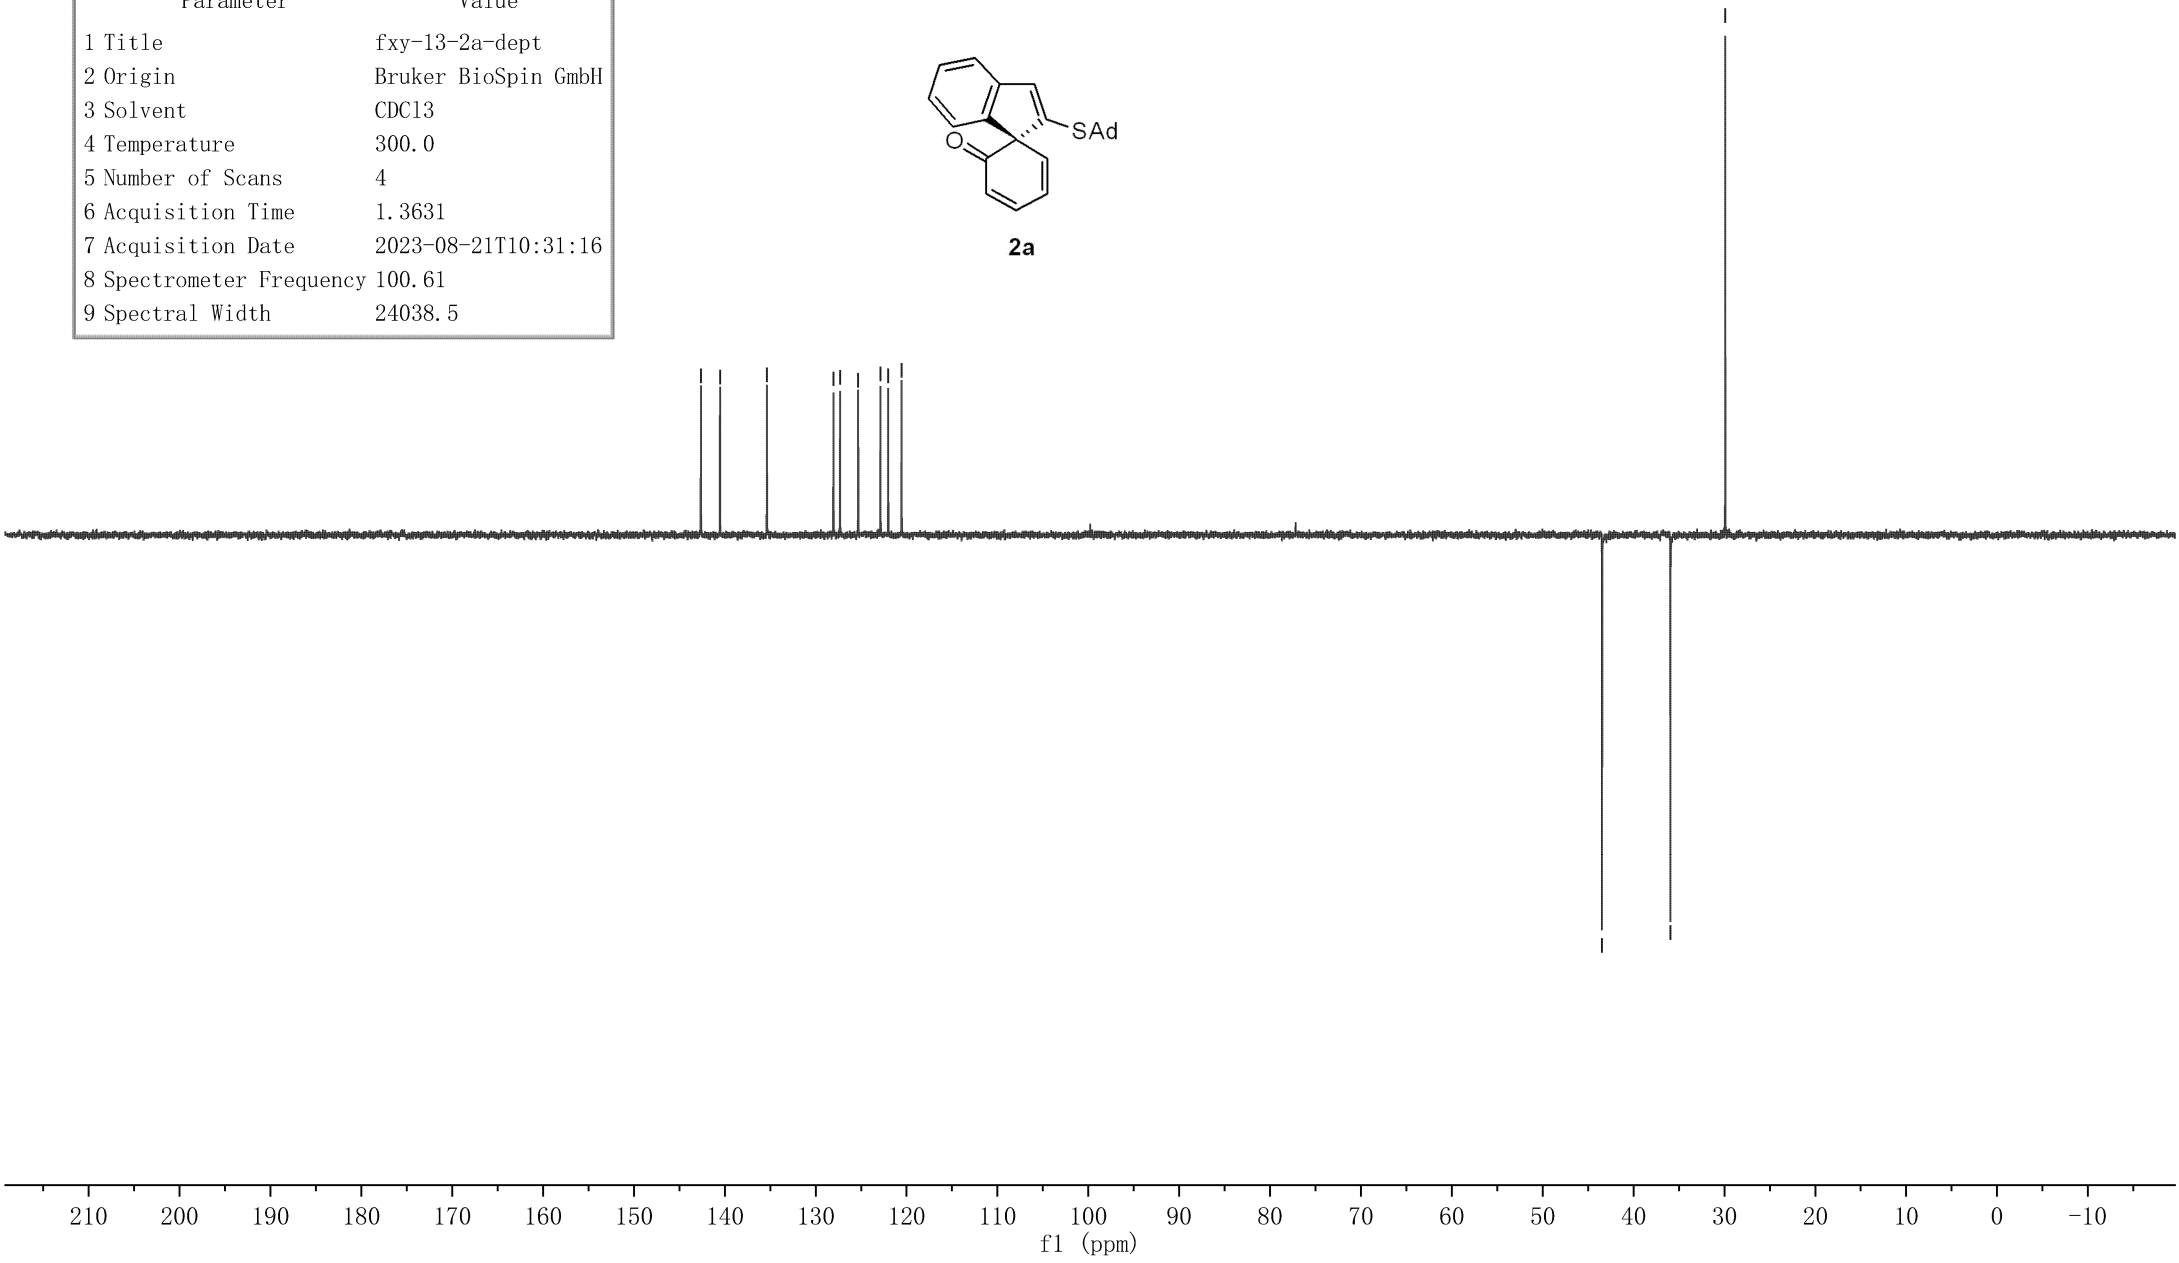

| Parameter                | Value               |
|--------------------------|---------------------|
| 1 Title                  | fxv-7-65            |
| 2 Origin                 | Bruker BioSpin GmbH |
| 3 Solvent                | CDC13               |
| 4 Temperature            | 298.0               |
| 5 Number of Scans        | 5                   |
| 6 Acquisition Time       | 4.0894              |
| 7 Acquisition Date       | 2022-02-11T10:15:41 |
| 8 Spectrometer Frequency | 400.13              |
| 9 Spectral Width         | 8012.8              |

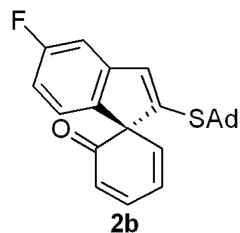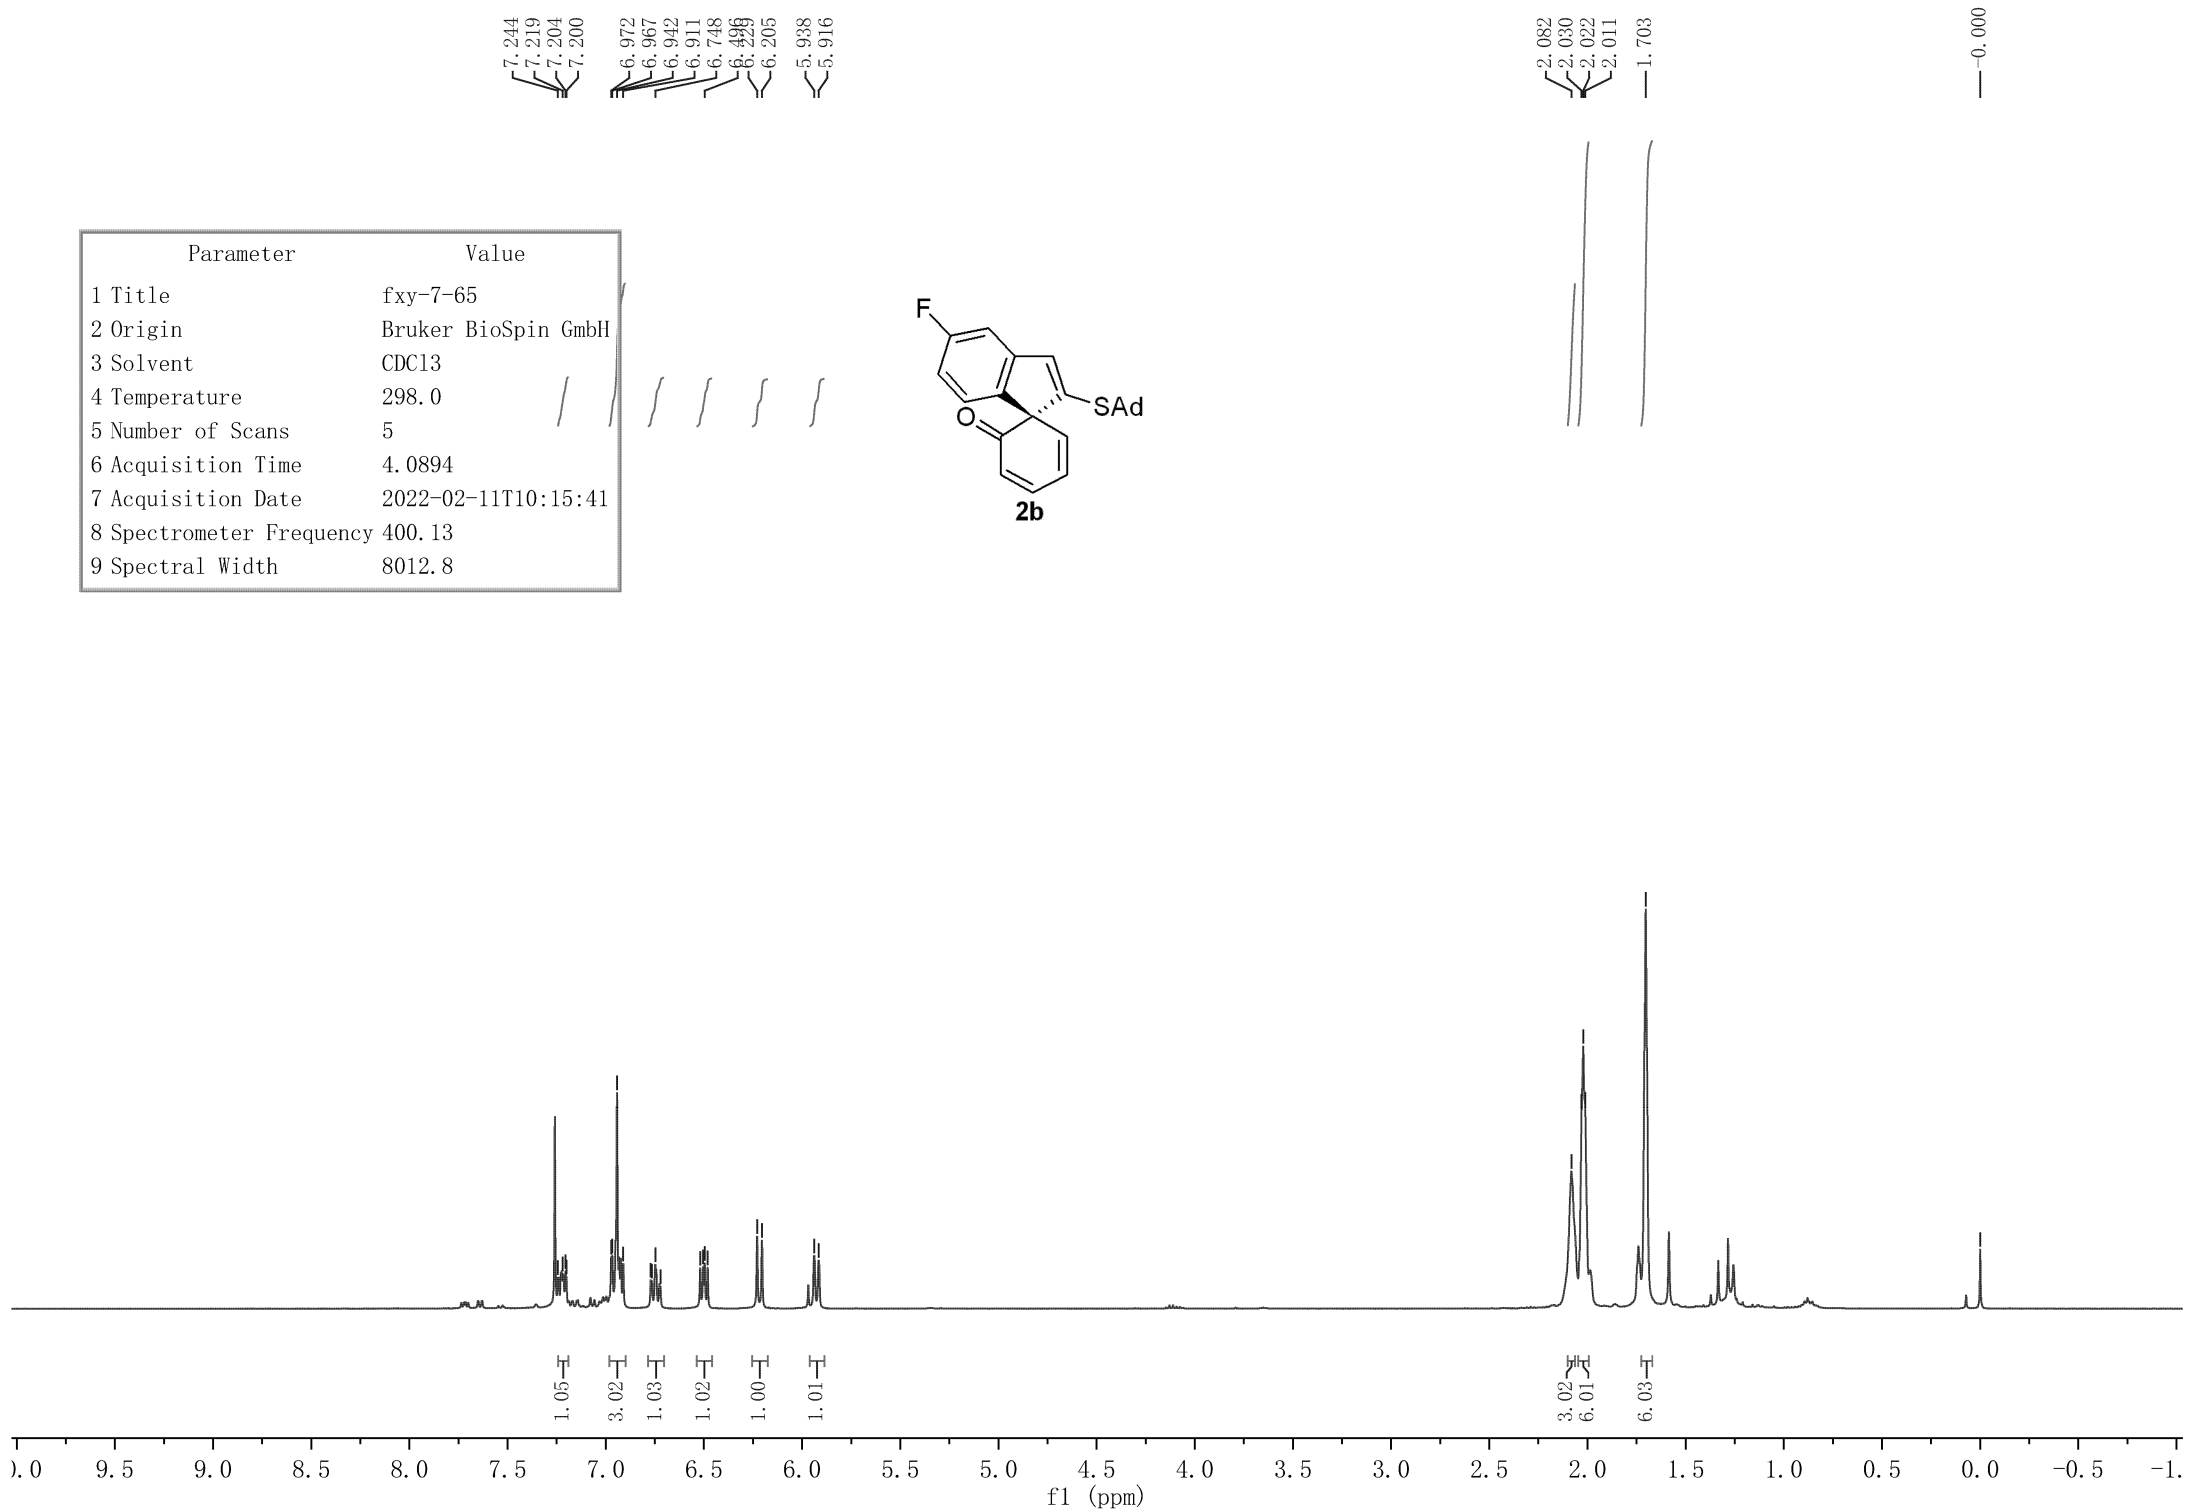

196.66

164.34  
161.90

147.41  
147.31  
145.14  
142.71  
140.25  
138.93  
138.90  
133.38  
133.36

127.42  
123.11  
123.02

111.90  
111.67  
107.91  
107.67

77.32  
77.00  
76.68  
71.94

50.46

43.47

36.07

30.03

| Parameter                | Value               |
|--------------------------|---------------------|
| 1 Title                  | fxv-7-65-C          |
| 2 Origin                 | Bruker BioSpin GmbH |
| 3 Solvent                | CDC13               |
| 4 Temperature            | 300.0               |
| 5 Number of Scans        | 197                 |
| 6 Acquisition Time       | 1.3631              |
| 7 Acquisition Date       | 2022-02-11T10:16:44 |
| 8 Spectrometer Frequency | 100.61              |
| 9 Spectral Width         | 24038.5             |



164.34  
161.90

147.41  
147.31  
145.14  
142.71  
140.25  
138.93  
138.90  
133.38  
133.36

127.42  
123.11  
123.02

111.90  
111.67  
107.91  
107.67

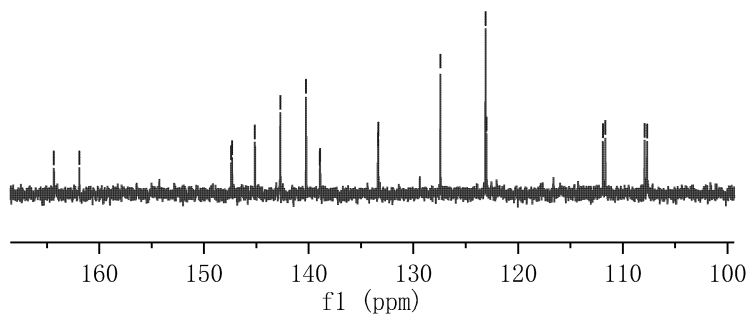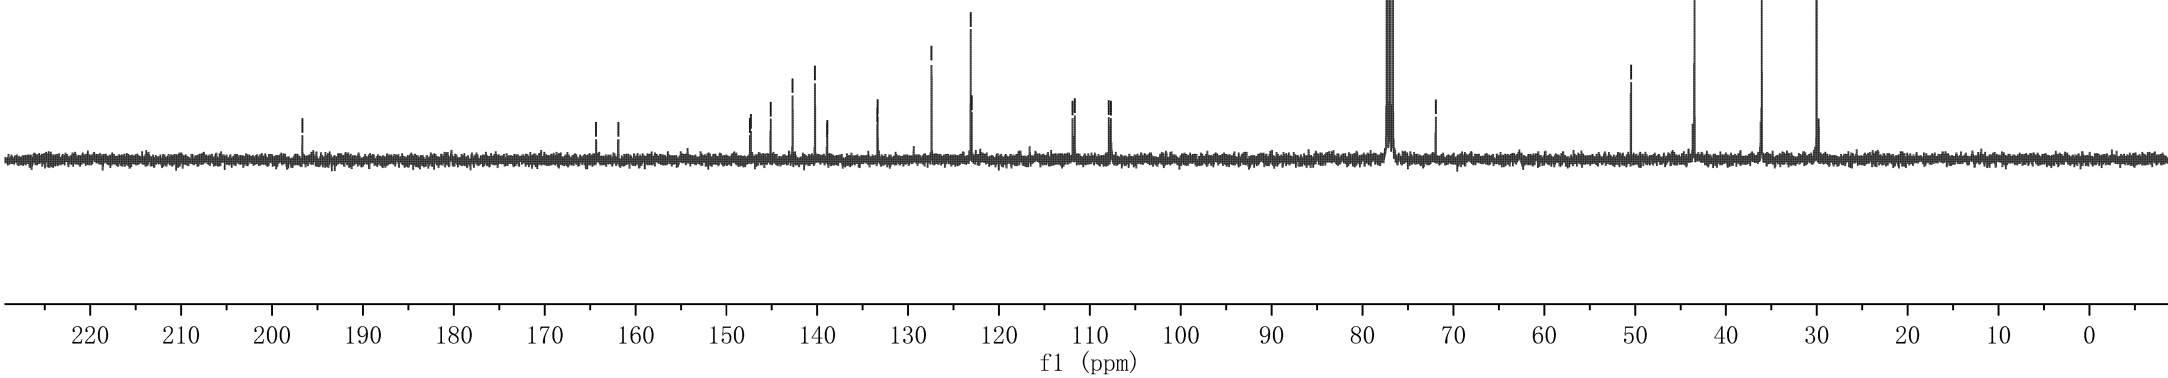

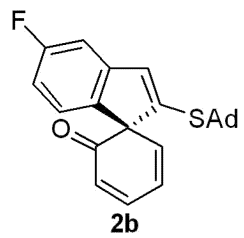

—114.02

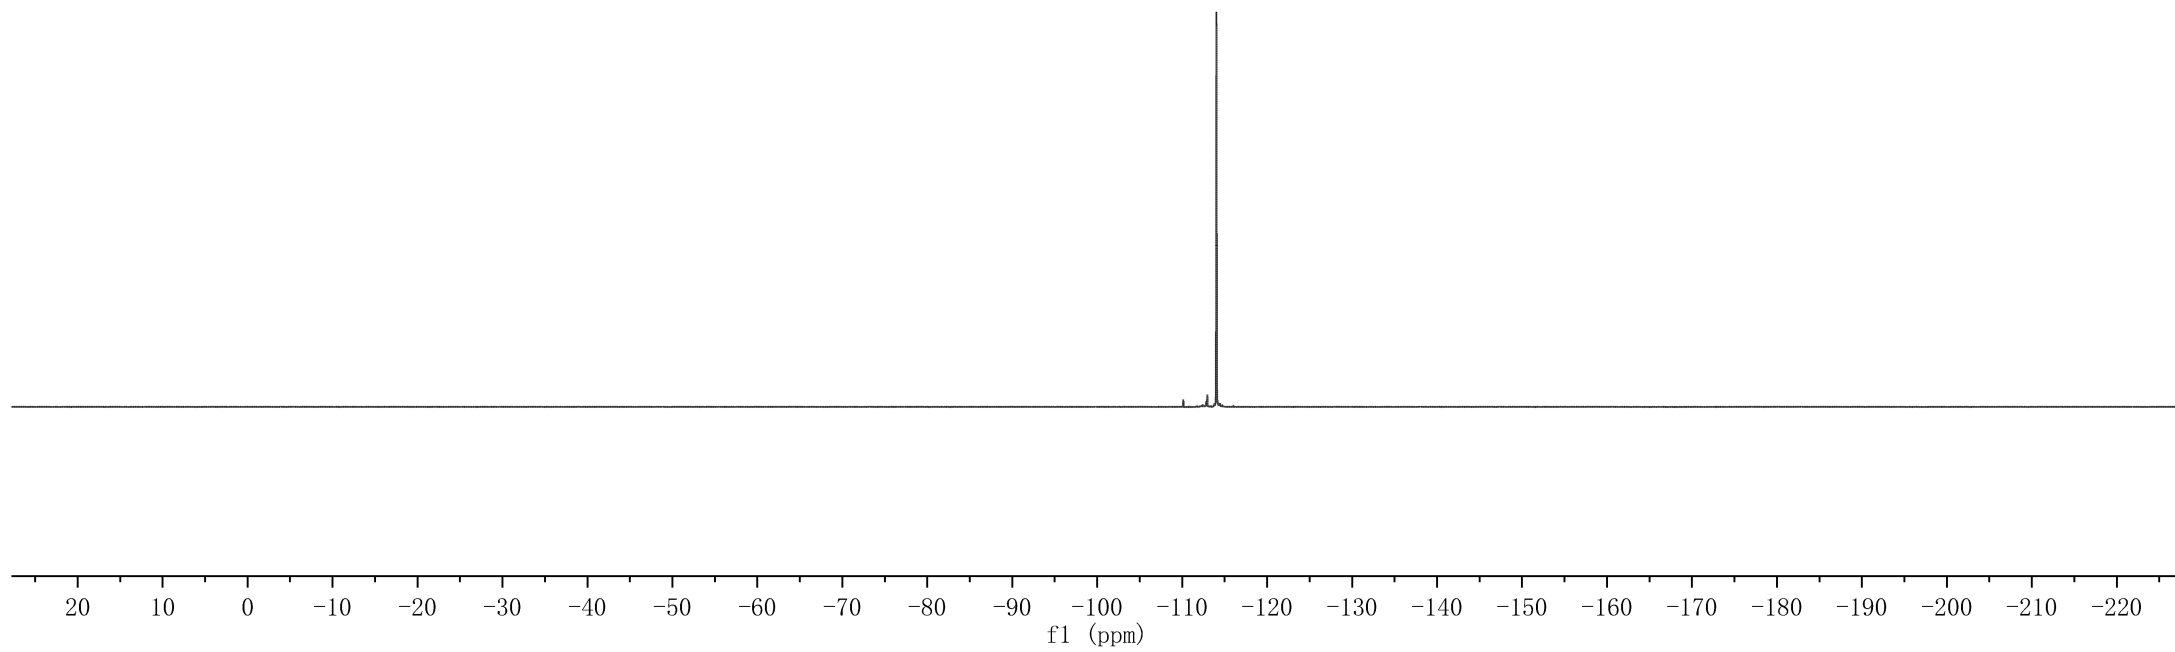

| Parameter                | Value               |
|--------------------------|---------------------|
| 1 Title                  | 2e                  |
| 2 Origin                 | Bruker BioSpin GmbH |
| 3 Solvent                | CDC13               |
| 4 Temperature            | 298.0               |
| 5 Number of Scans        | 3                   |
| 6 Acquisition Time       | 4.0894              |
| 7 Acquisition Date       | 2022-02-26T09:12:42 |
| 8 Spectrometer Frequency | 400.13              |
| 9 Spectral Width         | 8012.8              |

7.242  
7.224  
7.219  
7.203  
7.043  
7.039  
7.023  
7.019  
6.926  
6.921  
6.900  
6.525  
6.510  
6.509  
6.229  
6.204  
5.927  
5.904

2.080  
2.016  
1.981  
1.701

0.000

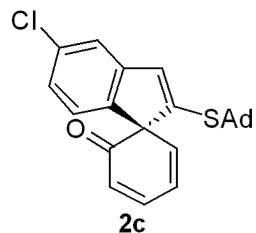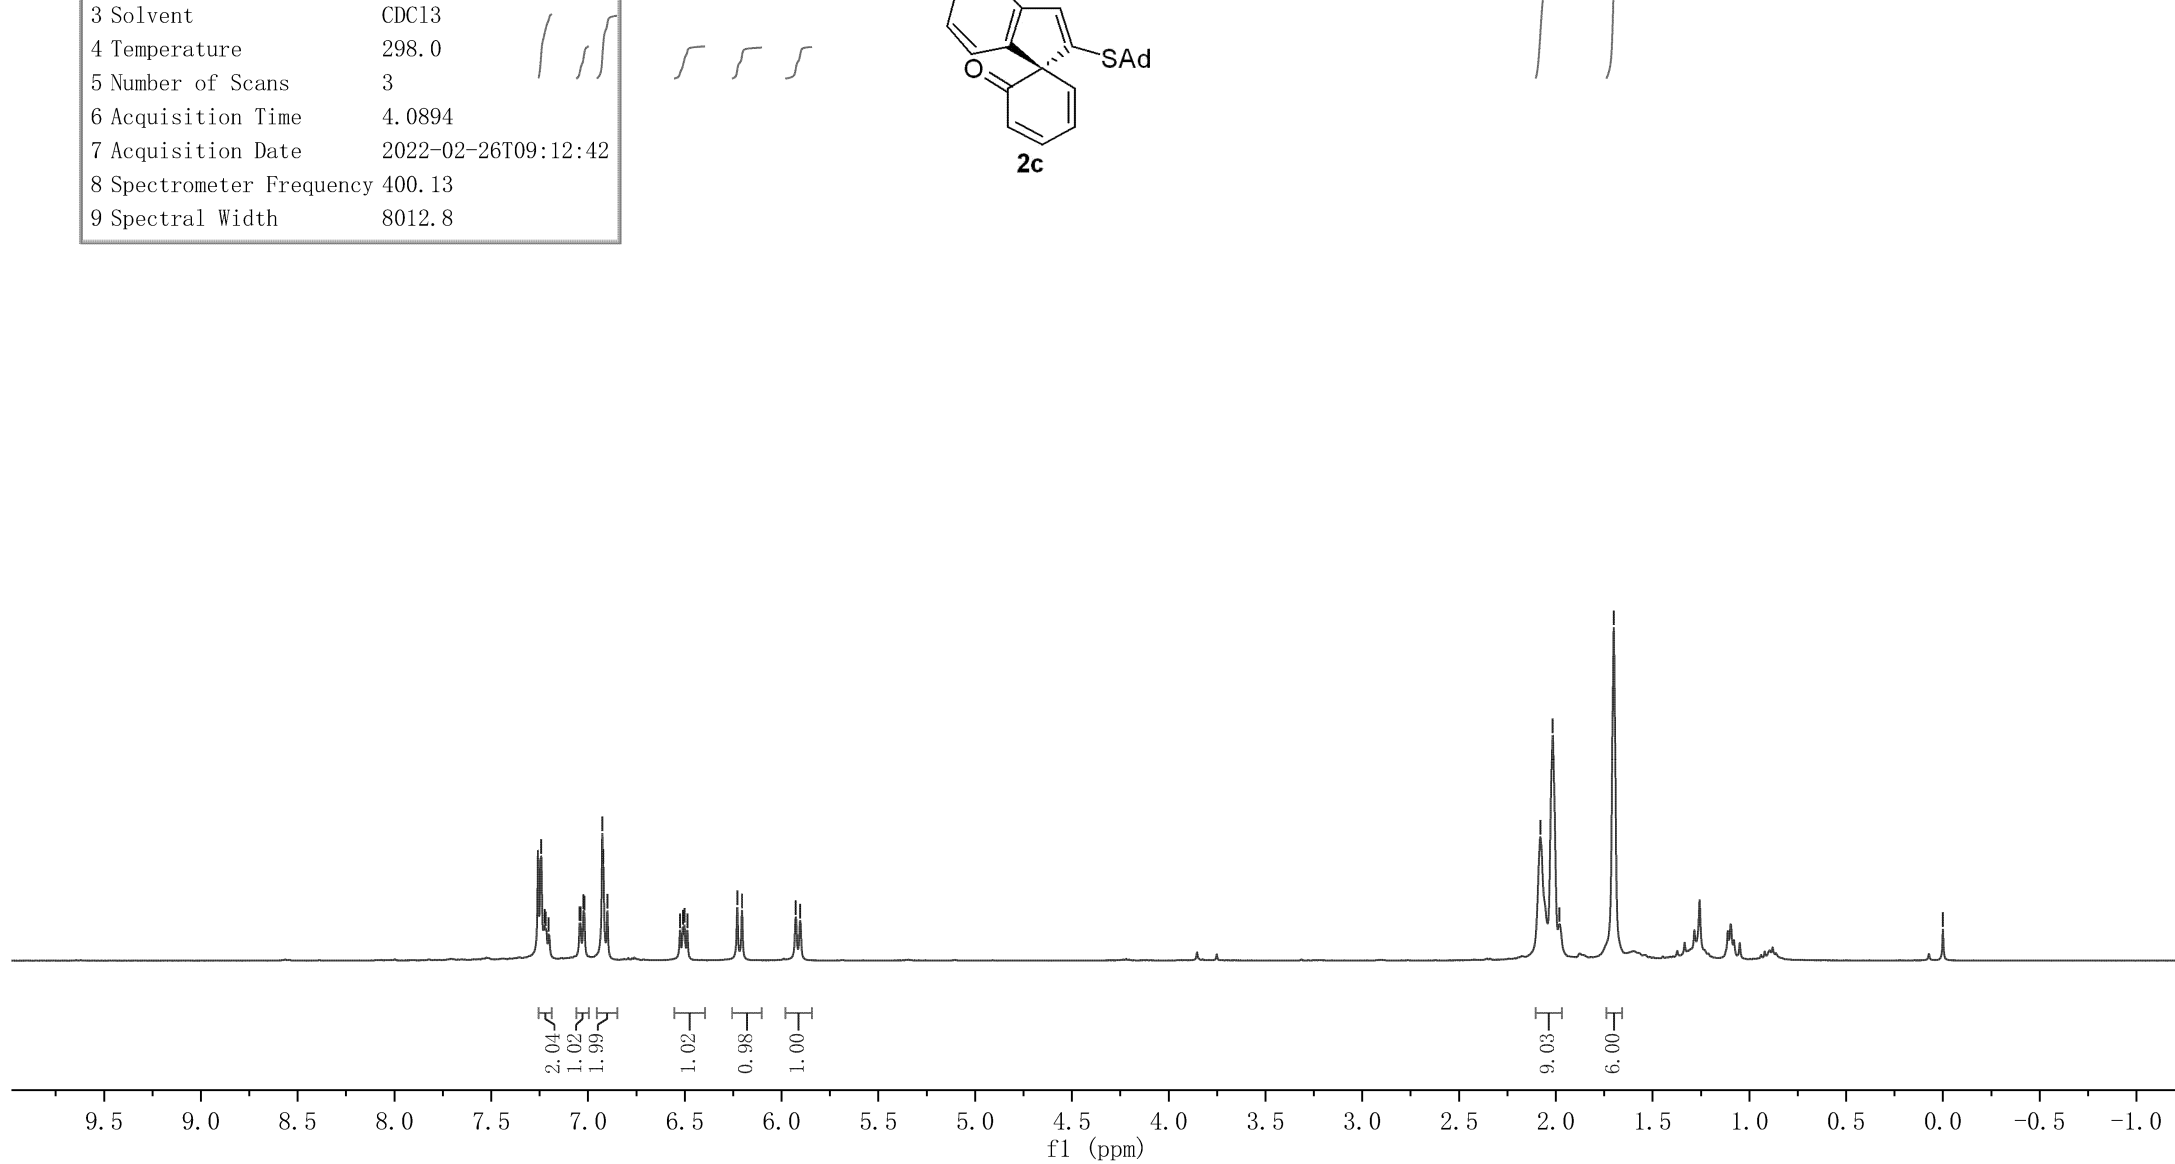

| Parameter                | Value               |
|--------------------------|---------------------|
| 1 Title                  | 2e                  |
| 2 Origin                 |                     |
| 3 Solvent                | CDC13               |
| 4 Temperature            | 296.6               |
| 5 Number of Scans        | 200                 |
| 6 Acquisition Time       | 1.0000              |
| 7 Acquisition Date       | 2022-02-26T04:28:57 |
| 8 Spectrometer Frequency | 100.56              |
| 9 Spectral Width         | 26041.0             |



147.04  
144.86  
142.78  
141.71  
139.86  
134.15  
133.01  
127.40  
125.06  
123.28  
123.01  
120.64

77.32  
77.00  
76.68  
72.11

50.48  
43.42  
36.02  
29.98

147.04  
144.86  
142.78  
141.71  
139.86  
134.15  
133.01  
127.40  
125.06  
123.28  
123.01  
120.64

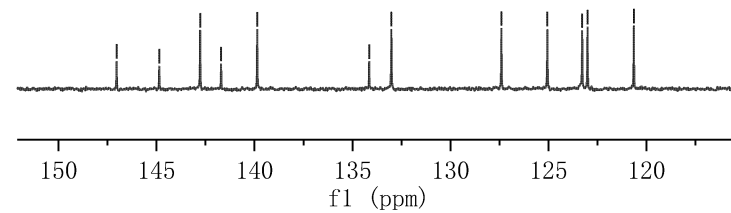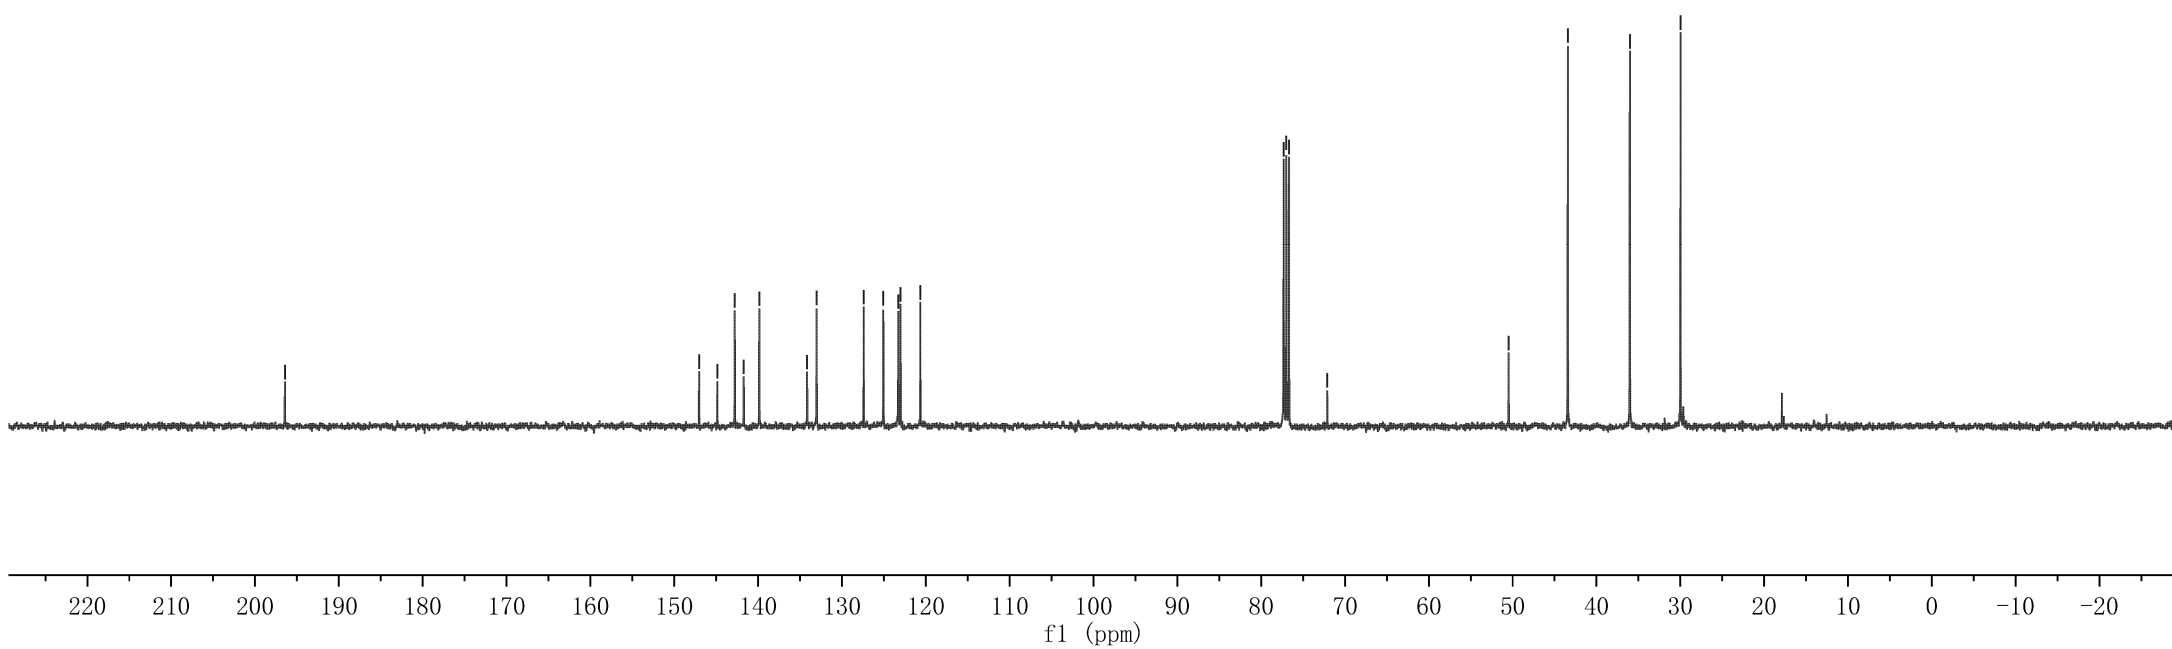

| Parameter                | Value               |
|--------------------------|---------------------|
| 1 Title                  | FXY-7-143           |
| 2 Origin                 |                     |
| 3 Solvent                | CDC13               |
| 4 Temperature            | 299.9               |
| 5 Number of Scans        | 16                  |
| 6 Acquisition Time       | 4.0002              |
| 7 Acquisition Date       | 2023-08-17T21:46:08 |
| 8 Spectrometer Frequency | 399.90              |
| 9 Spectral Width         | 8012.0              |

7.510  
7.335  
7.316  
7.270  
7.258  
7.246  
7.231  
7.102  
7.083  
7.006  
6.565  
6.543  
6.527  
6.256  
6.232  
5.934  
5.911

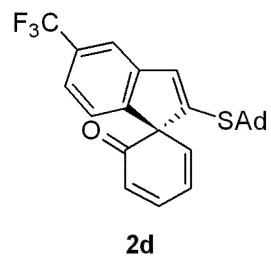

2.089  
2.034  
1.998  
1.711

0.000

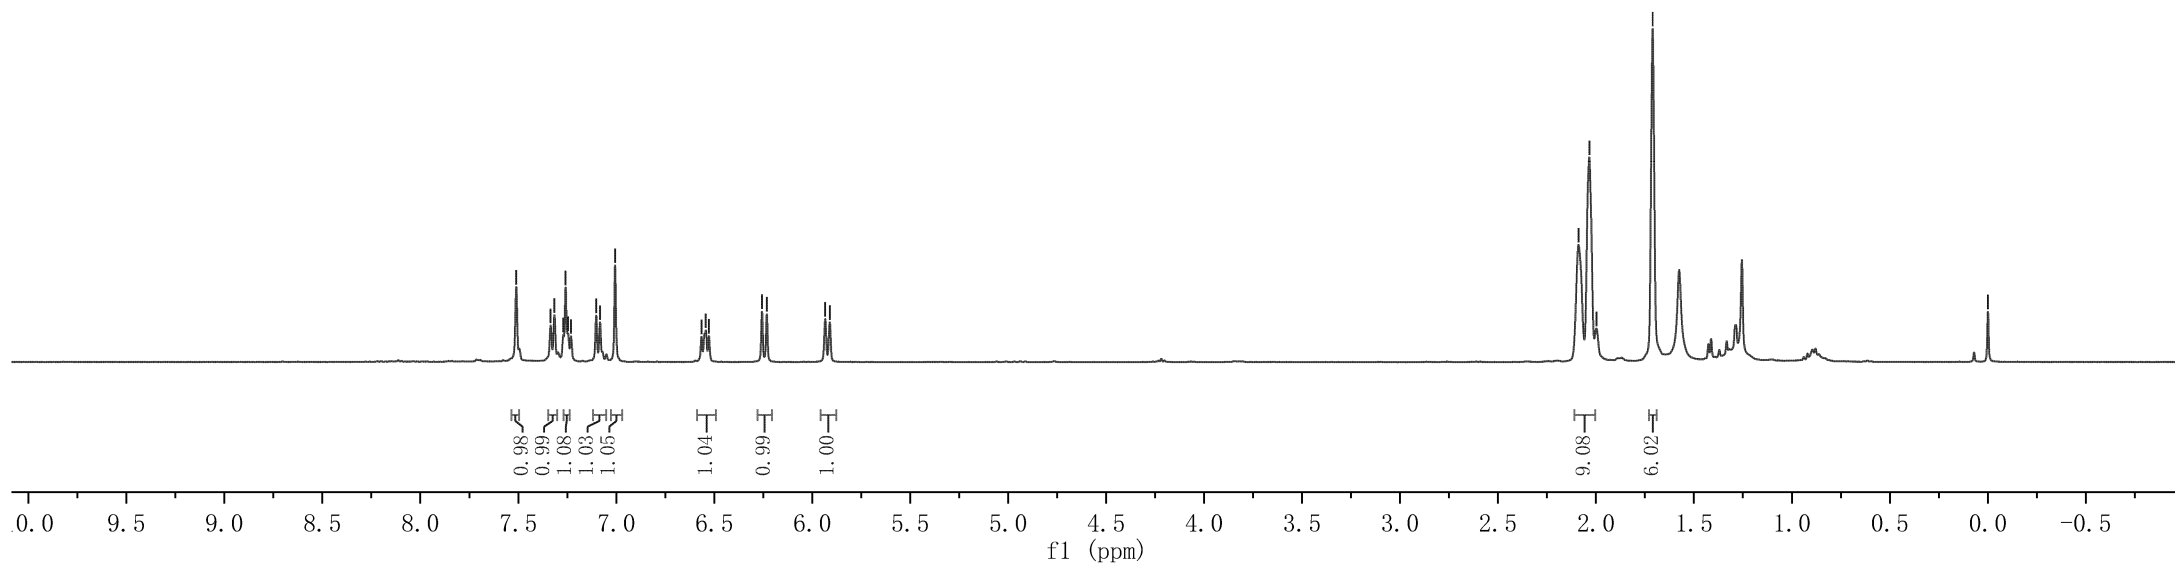



| Parameter                | Value               |
|--------------------------|---------------------|
| 1 Title                  | FXY-7-143           |
| 2 Origin                 |                     |
| 3 Solvent                | CDC13               |
| 4 Temperature            | 299.3               |
| 5 Number of Scans        | 3000                |
| 6 Acquisition Time       | 1.0000              |
| 7 Acquisition Date       | 2023-08-17T23:29:13 |
| 8 Spectrometer Frequency | 100.56              |
| 9 Spectral Width         | 26041.0             |

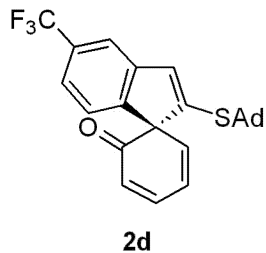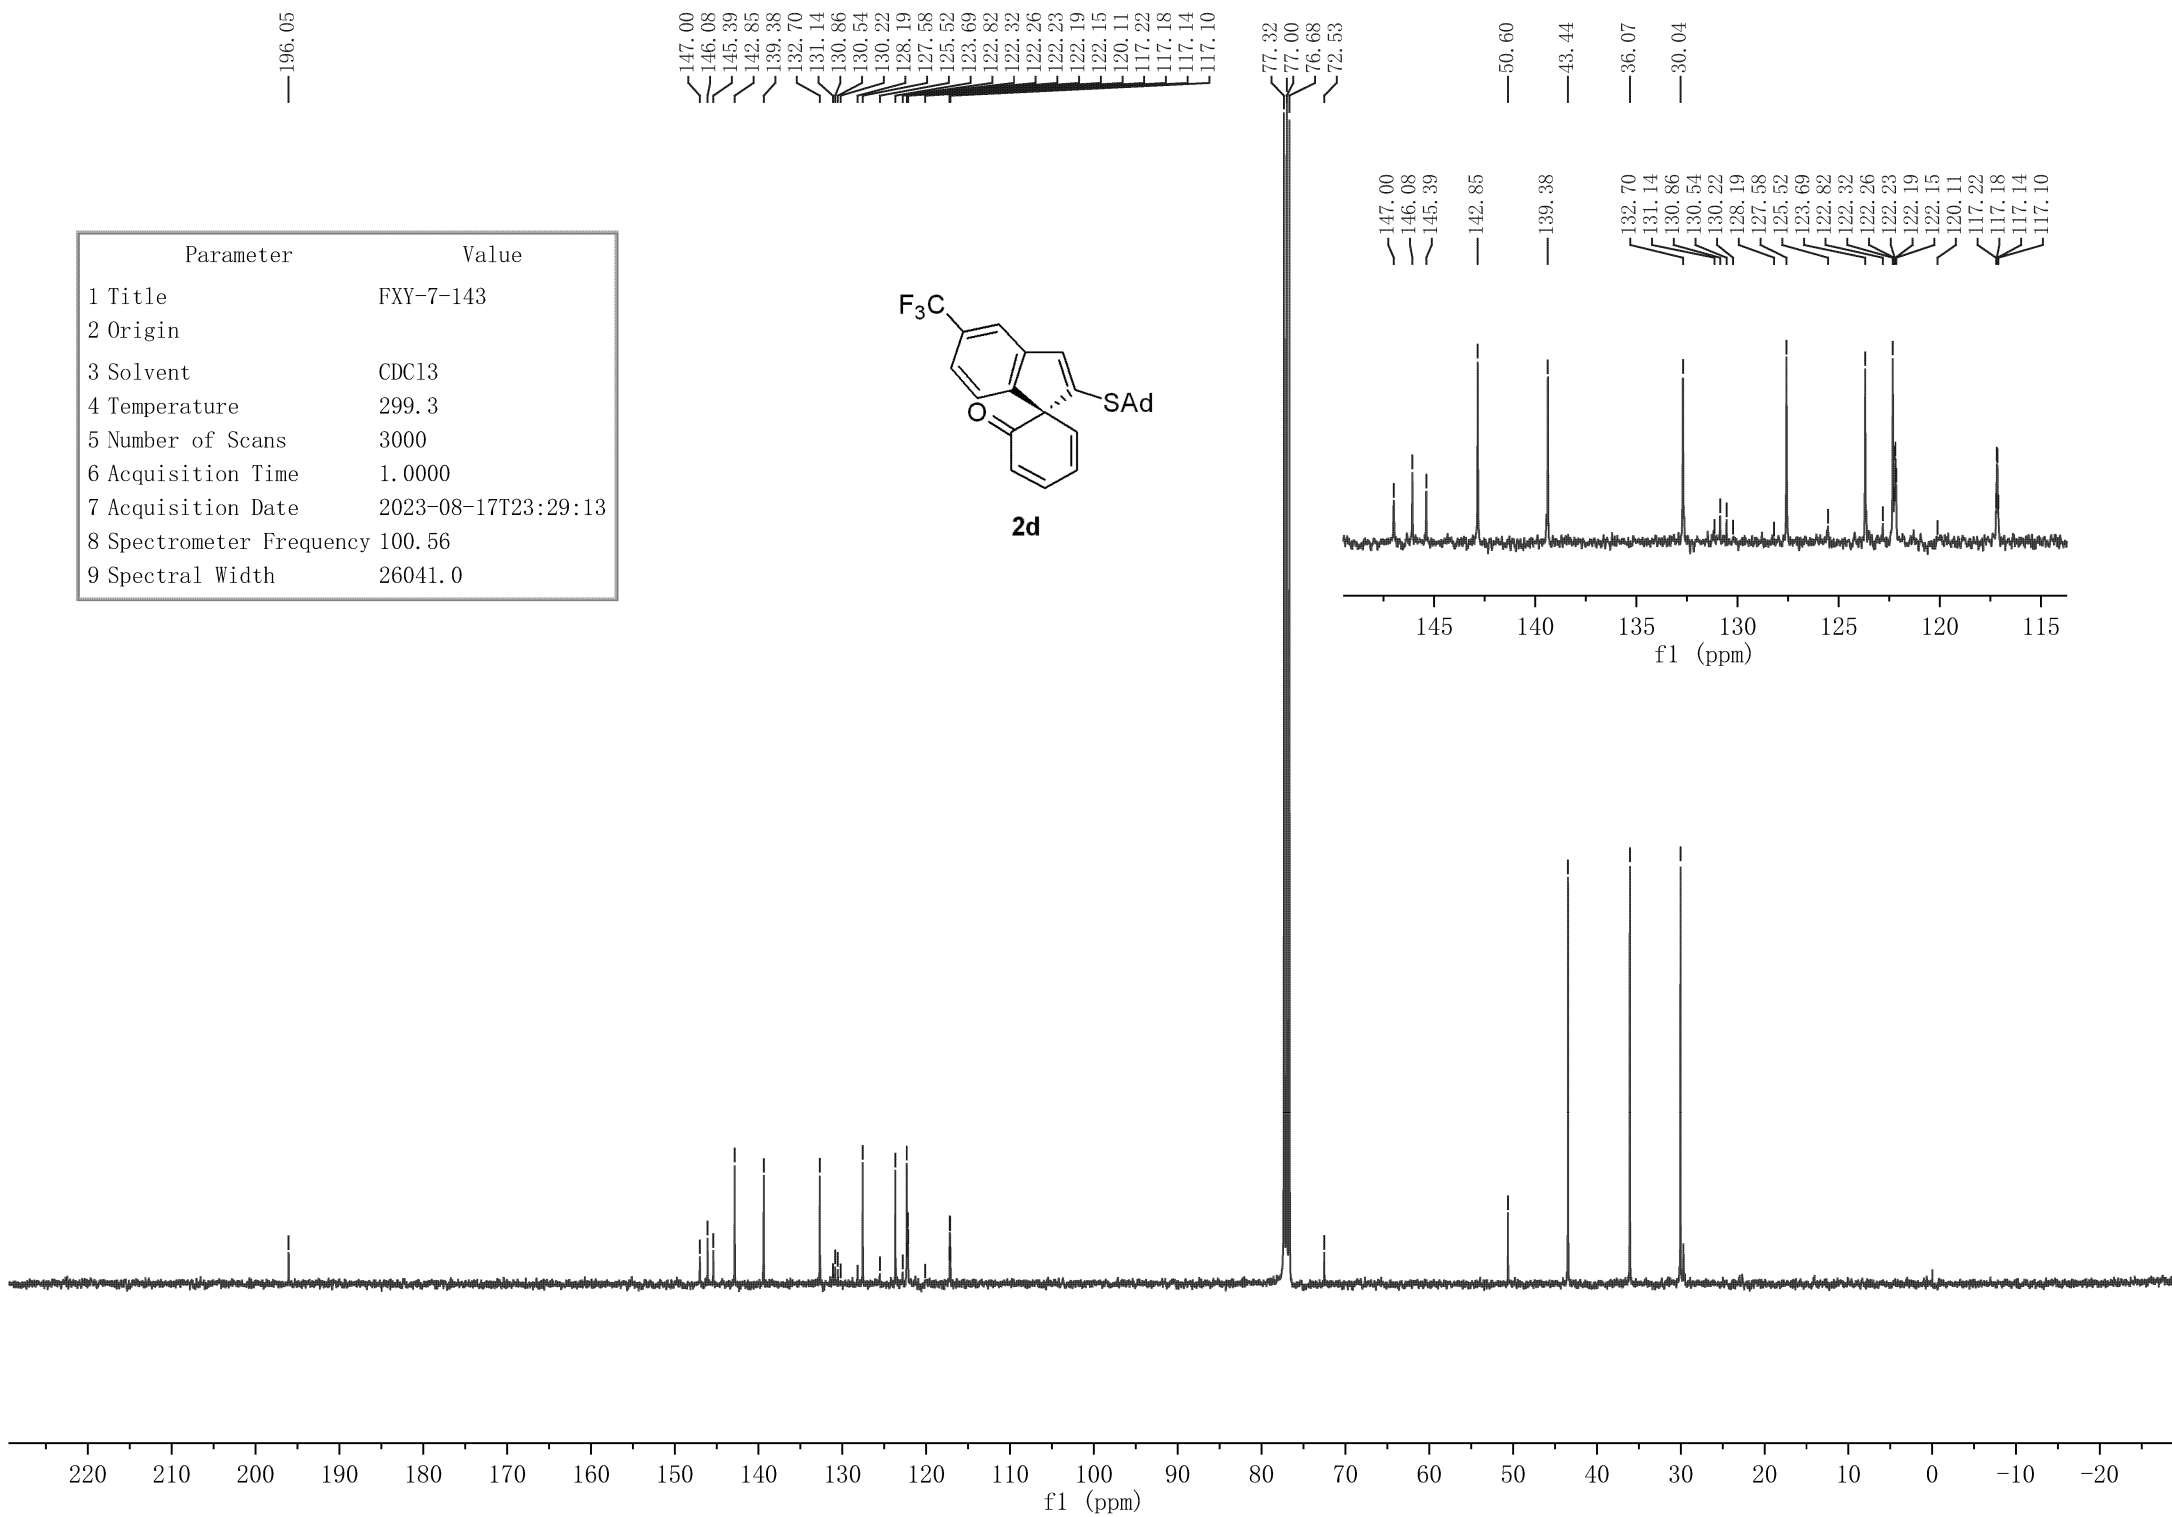

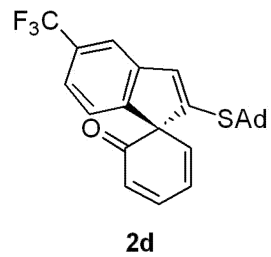

—62.34

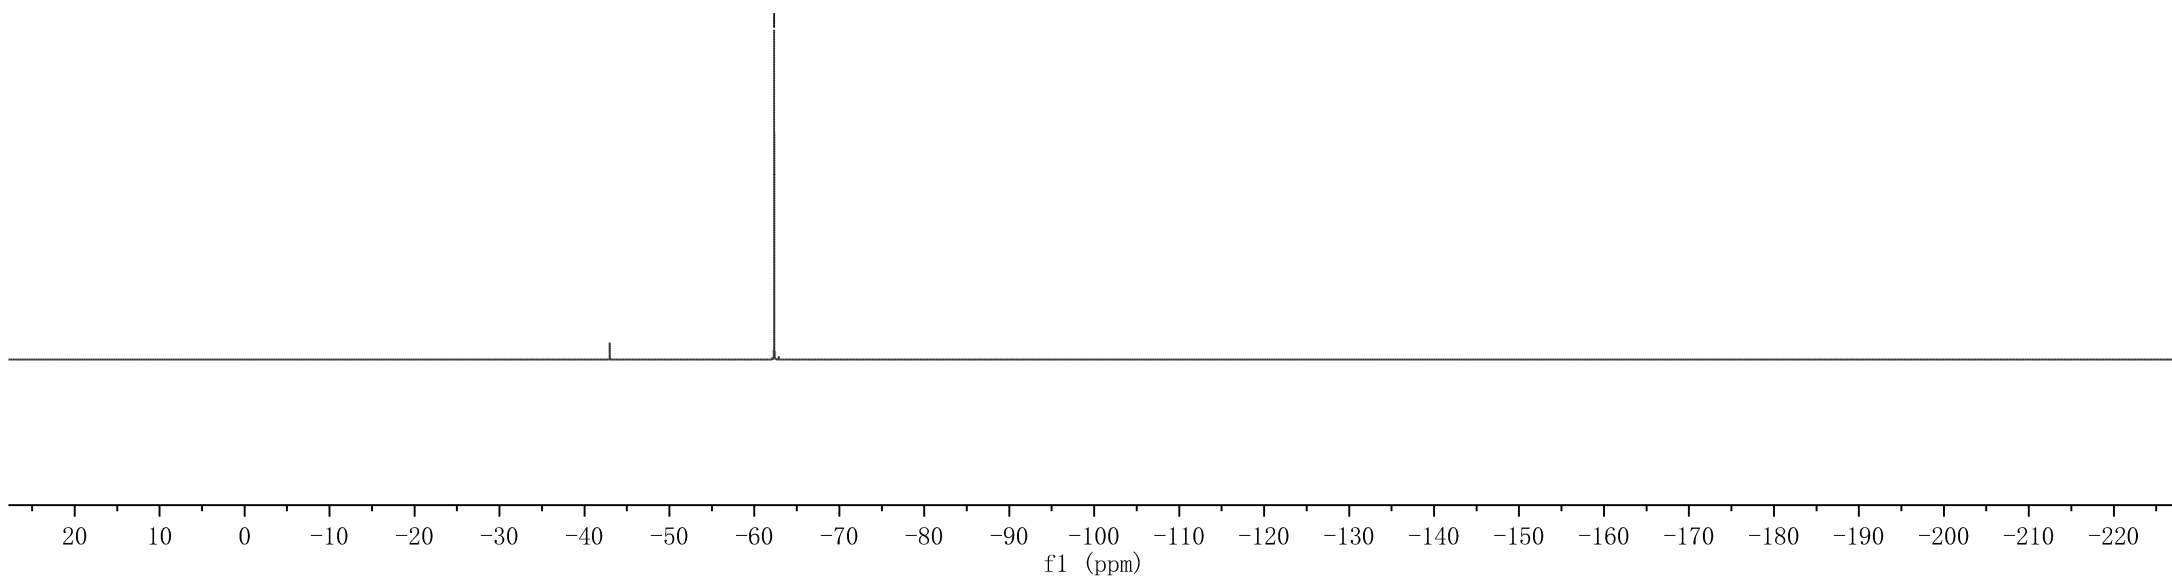

| Parameter                | Value               |
|--------------------------|---------------------|
| 1 Title                  | 2b                  |
| 2 Origin                 |                     |
| 3 Solvent                | CDC13               |
| 4 Temperature            | 299.3               |
| 5 Number of Scans        | 16                  |
| 6 Acquisition Time       | 4.0002              |
| 7 Acquisition Date       | 2023-08-17T00:10:19 |
| 8 Spectrometer Frequency | 399.90              |
| 9 Spectral Width         | 8012.0              |

7.223  
7.209  
7.199  
7.184  
7.104  
6.985  
6.891  
6.478  
6.472  
6.459  
6.417  
6.192  
5.948  
5.925

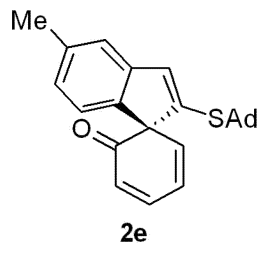

2.334  
2.061  
2.032  
1.995  
1.883

0.000

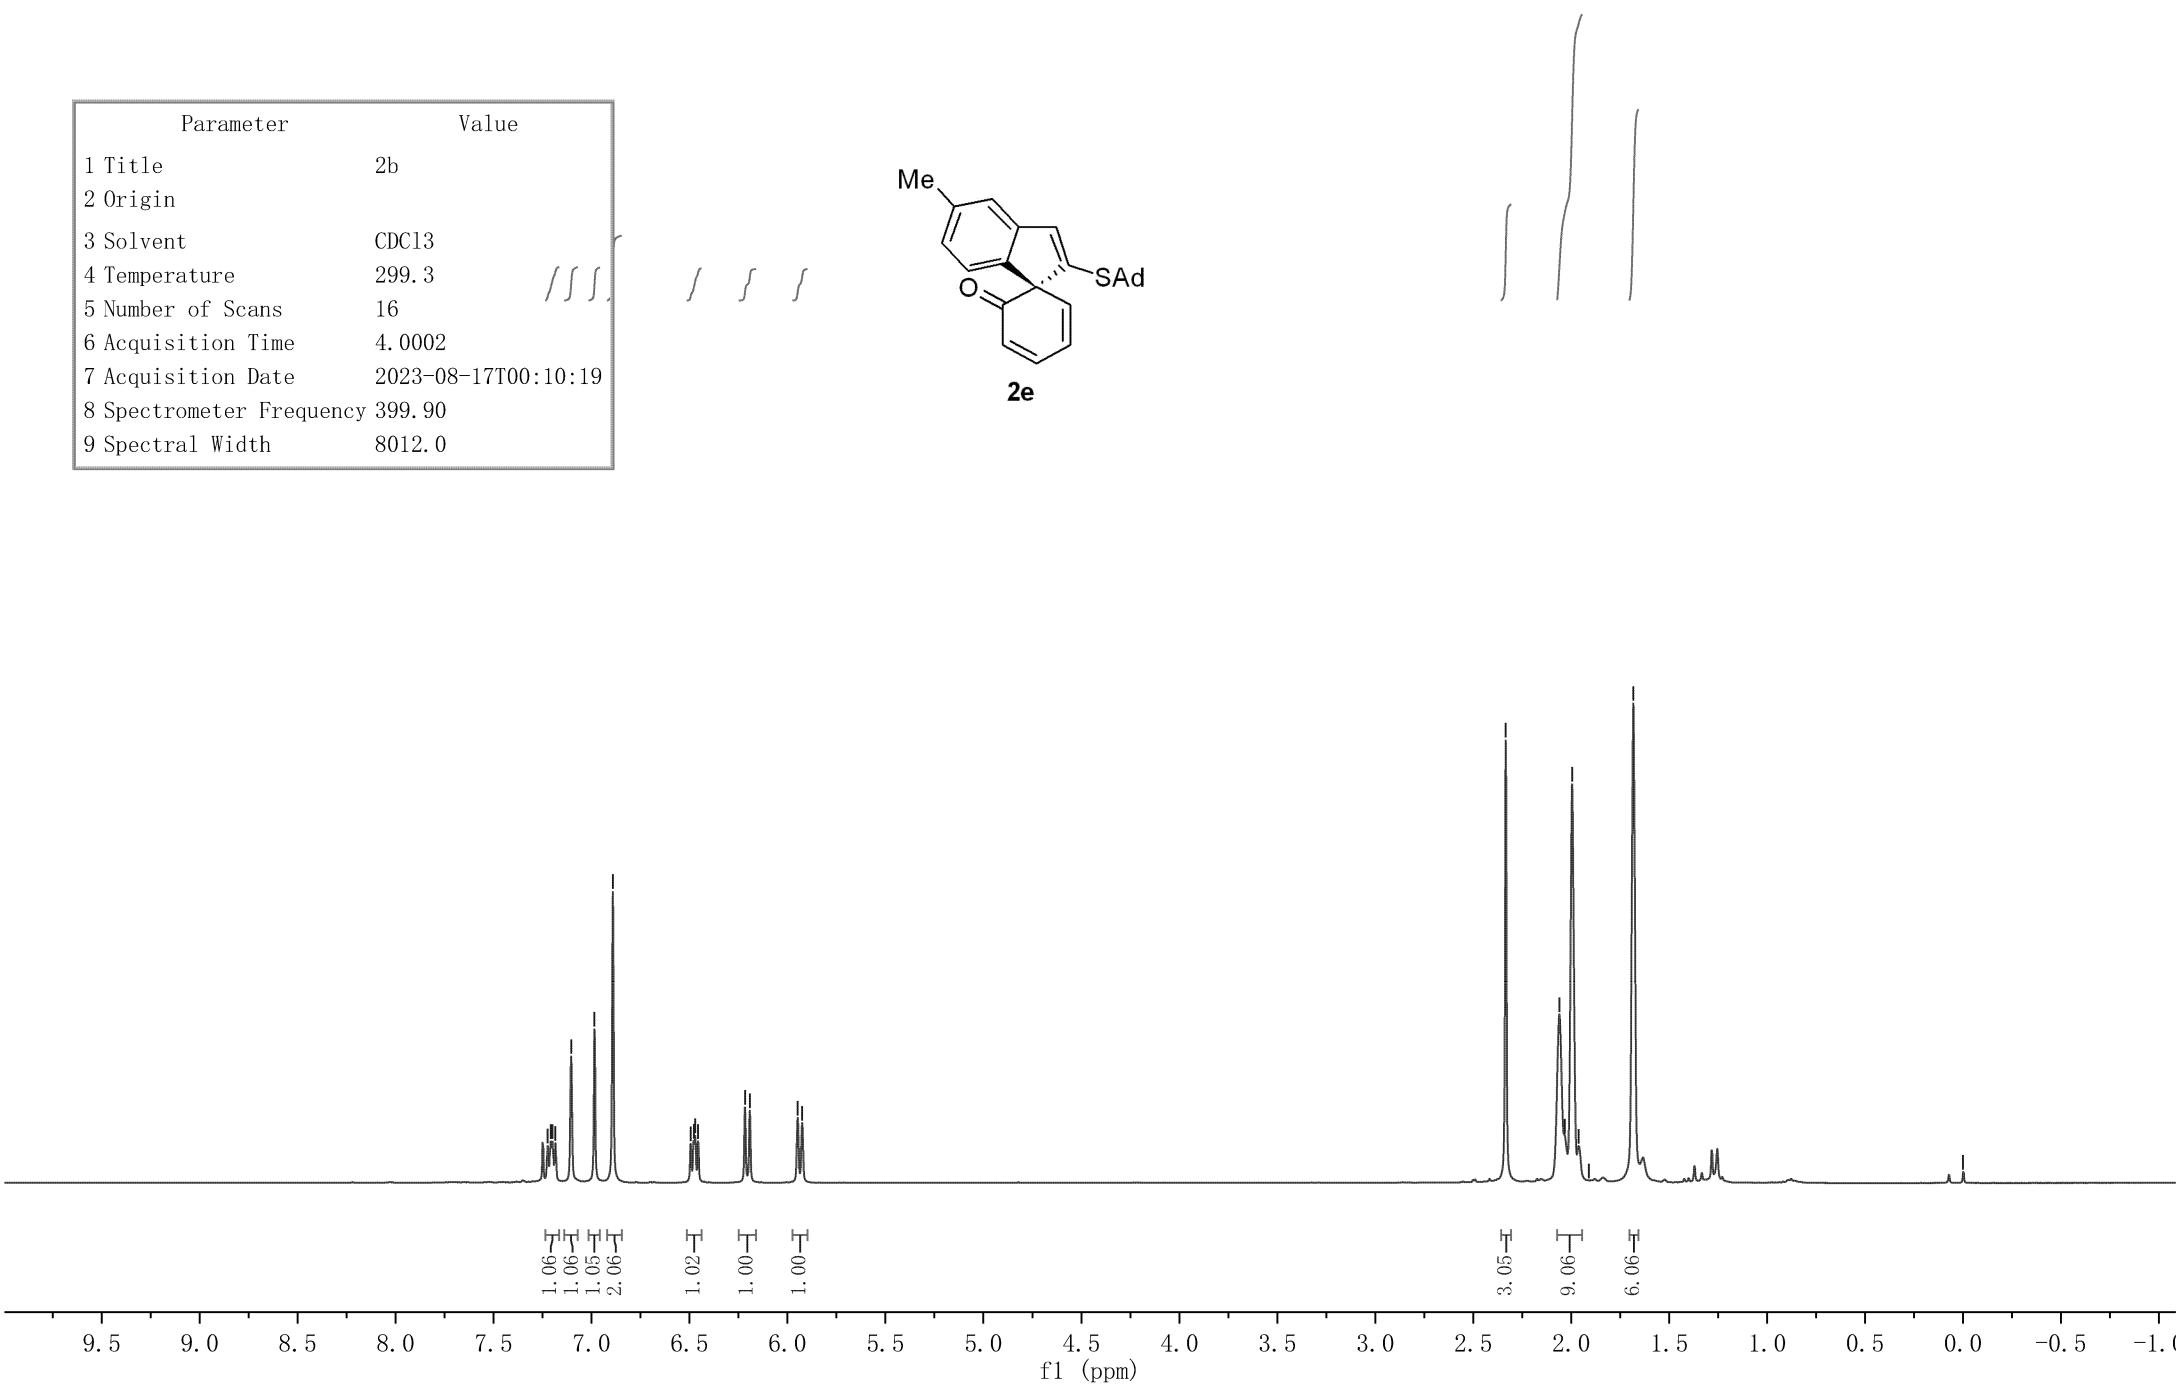

| Parameter                | Value               |
|--------------------------|---------------------|
| 1 Title                  | 2b                  |
| 2 Origin                 |                     |
| 3 Solvent                | CDC13               |
| 4 Temperature            | 299.5               |
| 5 Number of Scans        | 300                 |
| 6 Acquisition Time       | 1.0000              |
| 7 Acquisition Date       | 2023-08-17T00:23:06 |
| 8 Spectrometer Frequency | 100.56              |
| 9 Spectral Width         | 26041.0             |

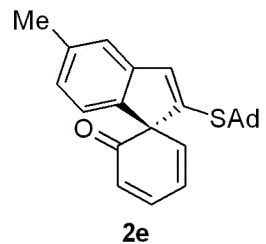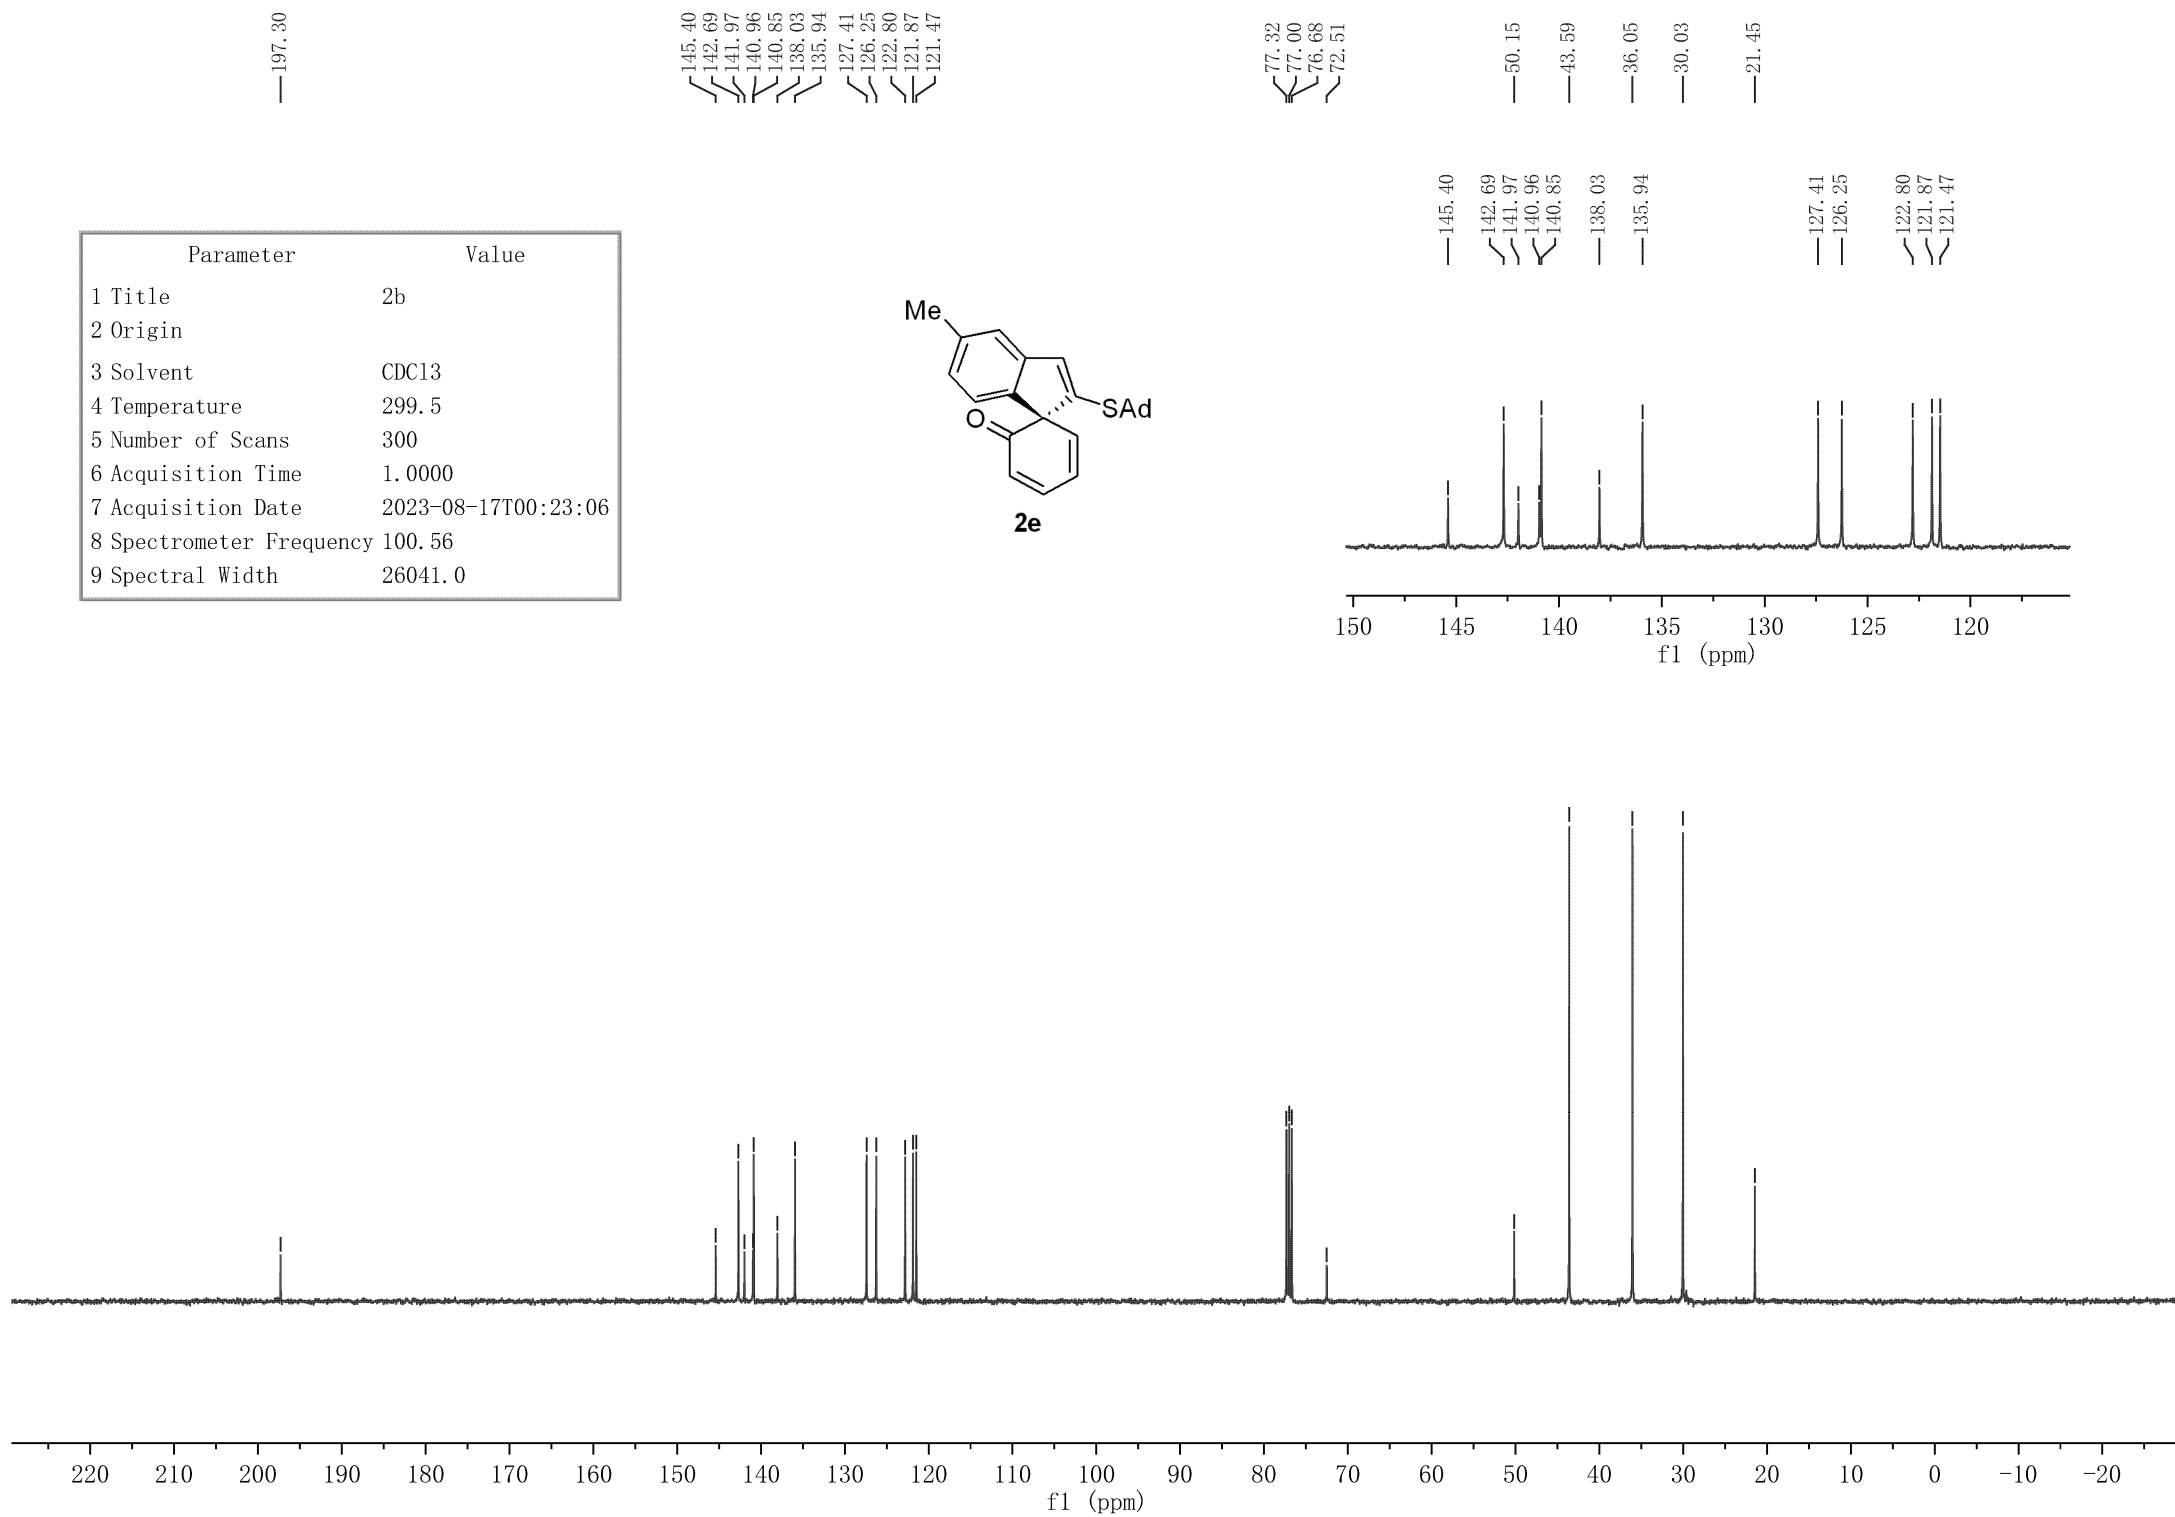

| Parameter                | Value               |
|--------------------------|---------------------|
| 1 Title                  | fxxy-7-95-H         |
| 2 Origin                 |                     |
| 3 Solvent                | CDC13               |
| 4 Temperature            | 299.3               |
| 5 Number of Scans        | 16                  |
| 6 Acquisition Time       | 4.0002              |
| 7 Acquisition Date       | 2023-08-16T23:45:33 |
| 8 Spectrometer Frequency | 399.90              |
| 9 Spectral Width         | 8012.0              |

7.232  
7.217  
7.212  
7.193  
6.975  
6.911  
6.890  
6.848  
6.629  
6.609  
6.496  
6.479  
6.473  
6.458  
6.221  
6.196  
5.962  
5.939

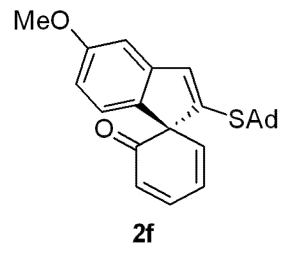

3.798  
2.074  
2.014  
1.979  
1.697  
0.000

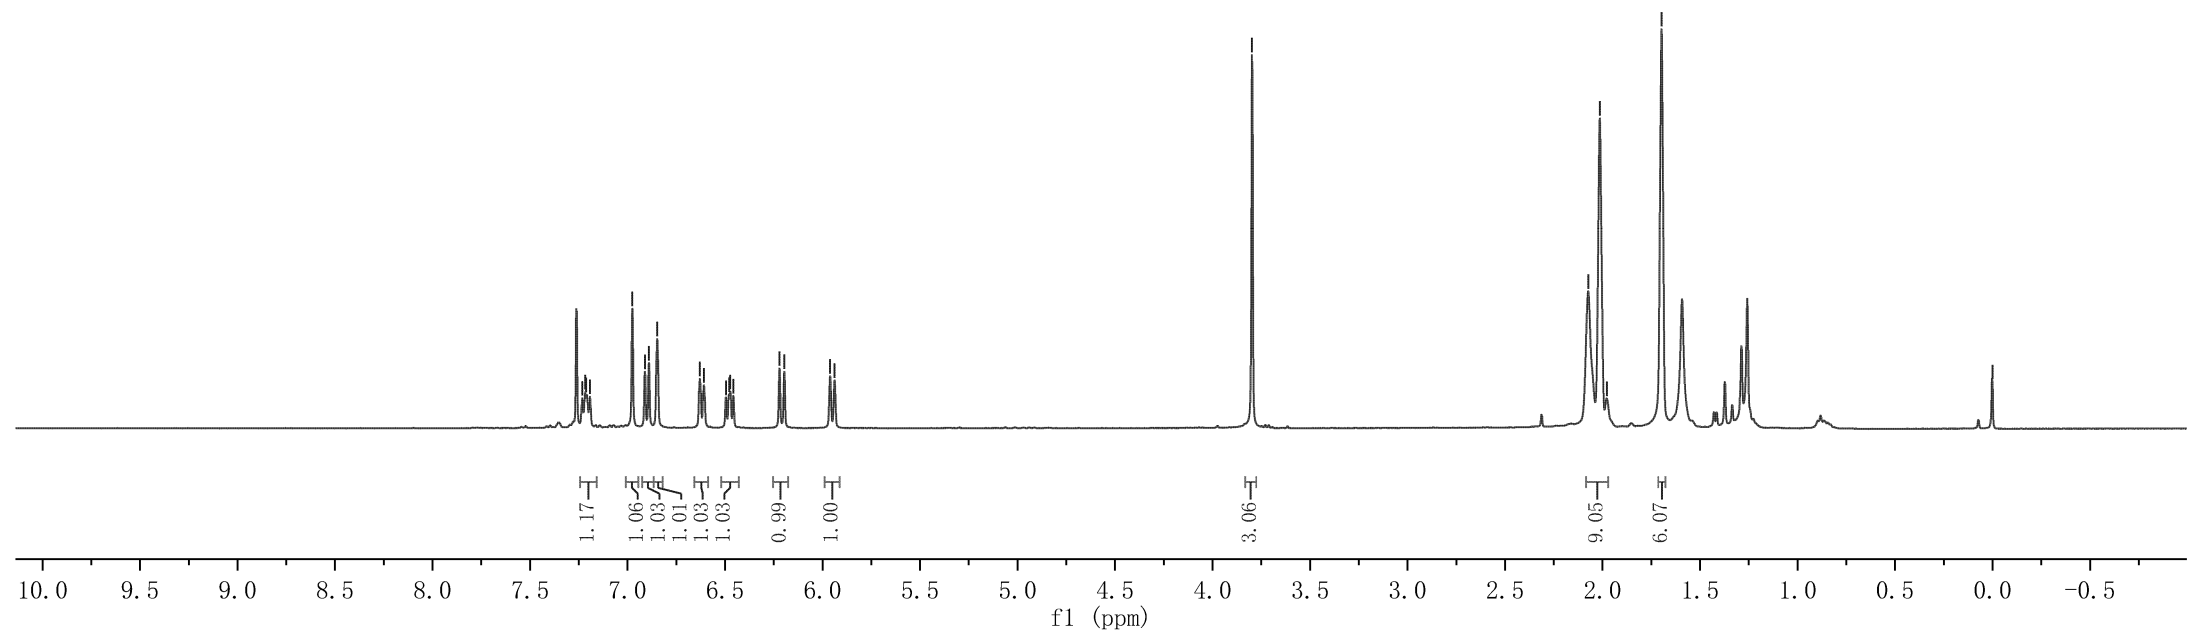

| Parameter                | Value               |
|--------------------------|---------------------|
| 1 Title                  | FXY -7-95-CC        |
| 2 Origin                 |                     |
| 3 Solvent                | CDC13               |
| 4 Temperature            | 299.2               |
| 5 Number of Scans        | 300                 |
| 6 Acquisition Time       | 1.0000              |
| 7 Acquisition Date       | 2023-08-17T09:31:27 |
| 8 Spectrometer Frequency | 100.56              |
| 9 Spectral Width         | 26041.0             |

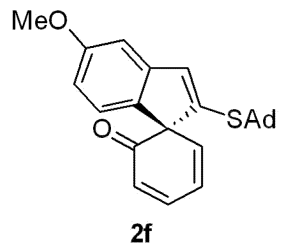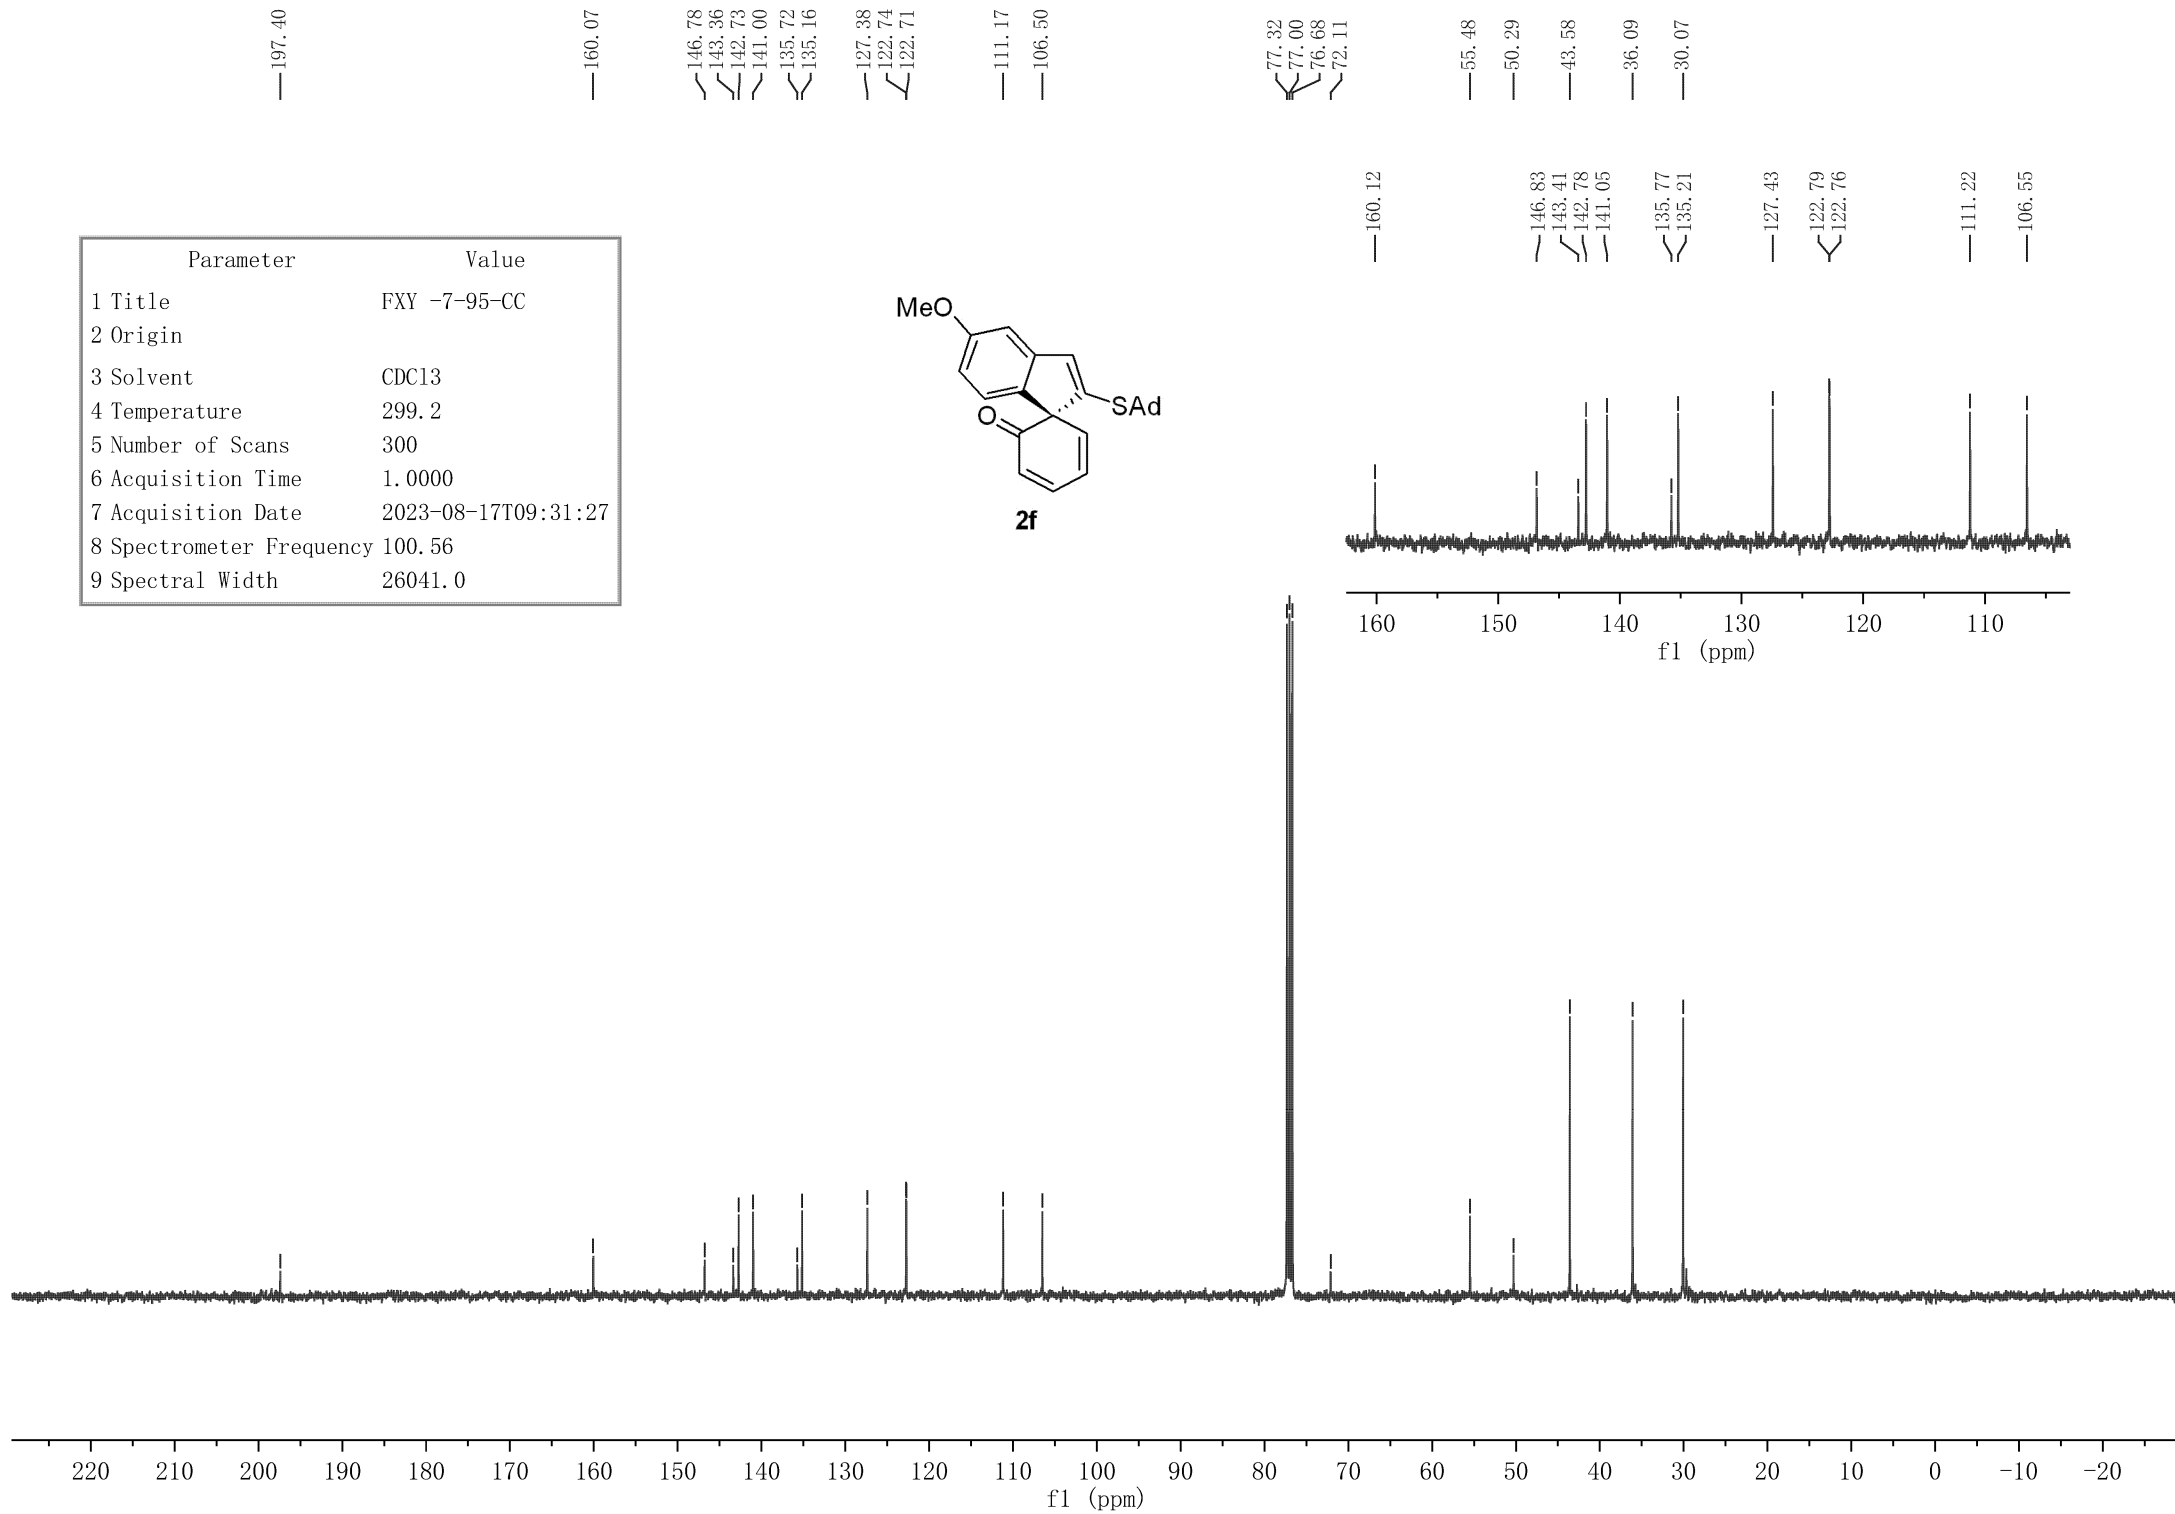

| Parameter                | Value               |
|--------------------------|---------------------|
| 1 Title                  | 2g                  |
| 2 Origin                 |                     |
| 3 Solvent                | CDC13               |
| 4 Temperature            | 297.1               |
| 5 Number of Scans        | 16                  |
| 6 Acquisition Time       | 4.0002              |
| 7 Acquisition Date       | 2022-01-20T17:30:15 |
| 8 Spectrometer Frequency | 399.93              |
| 9 Spectral Width         | 8012.0              |

7.214  
7.210  
7.199  
7.171  
6.816  
6.695  
6.674  
6.471  
6.466  
6.338  
6.171  
6.164  
5.882

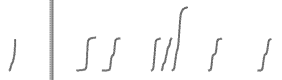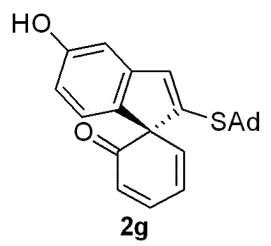

1.997  
1.967  
1.933  
1.901  
1.619

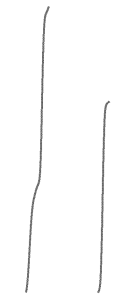

0.000

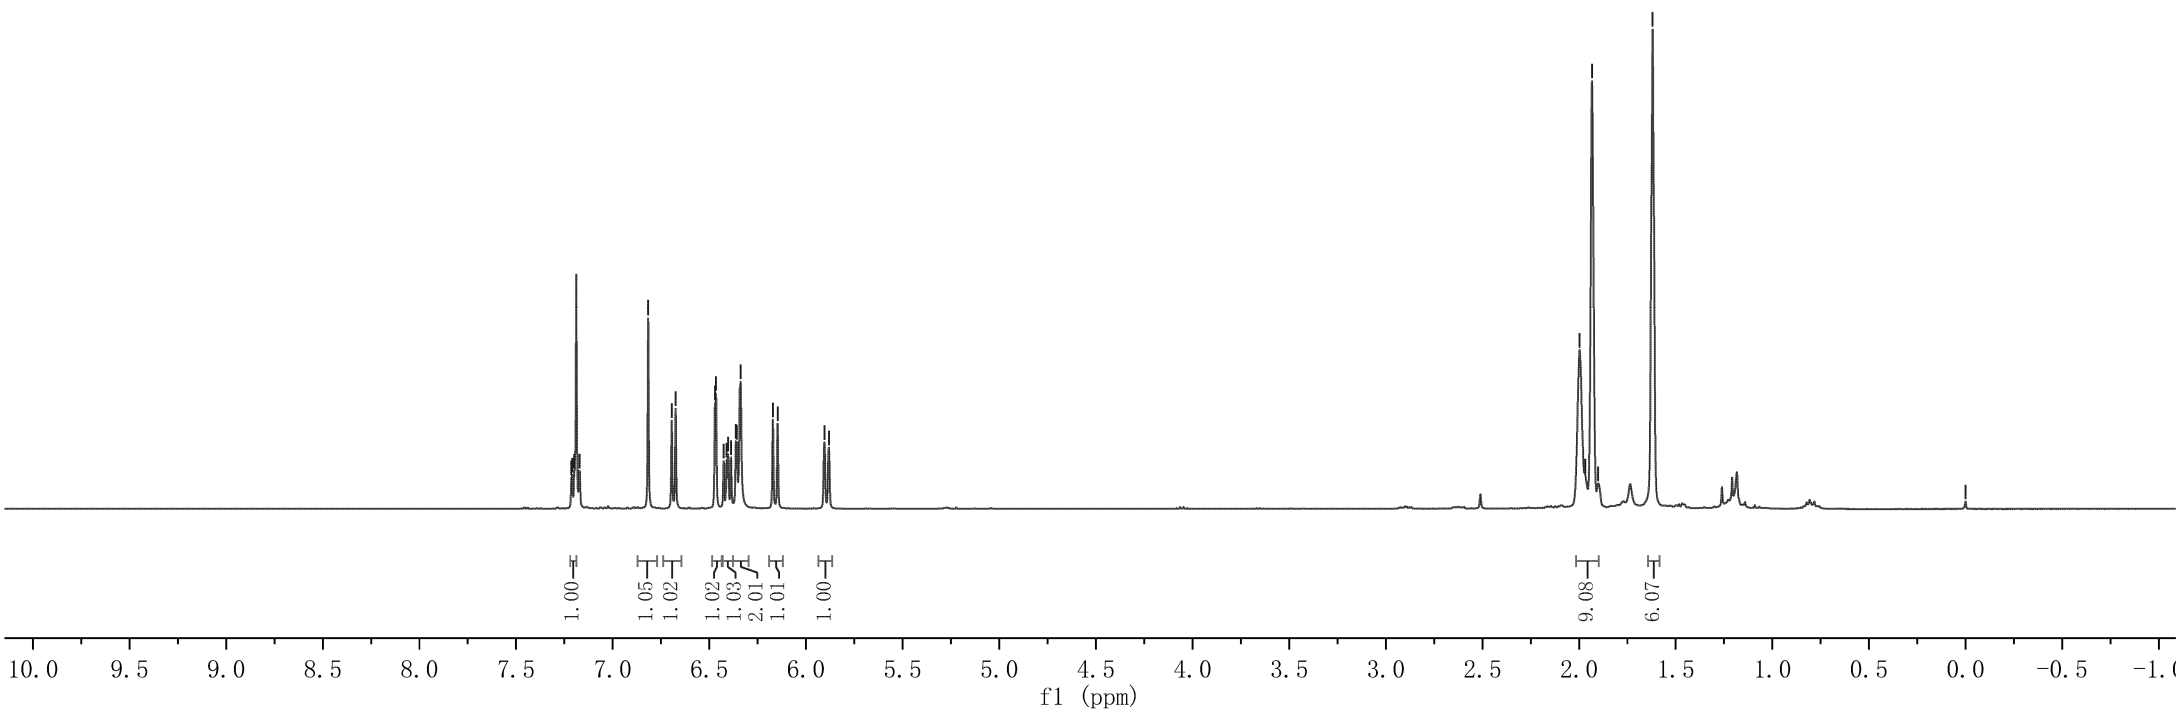

| Parameter                | Value               |
|--------------------------|---------------------|
| 1 Title                  | 2g                  |
| 2 Origin                 |                     |
| 3 Solvent                | CDC13               |
| 4 Temperature            | 297.2               |
| 5 Number of Scans        | 200                 |
| 6 Acquisition Time       | 1.0000              |
| 7 Acquisition Date       | 2022-01-20T17:39:39 |
| 8 Spectrometer Frequency | 100.56              |
| 9 Spectral Width         | 26041.0             |

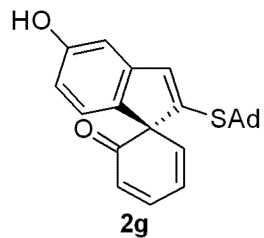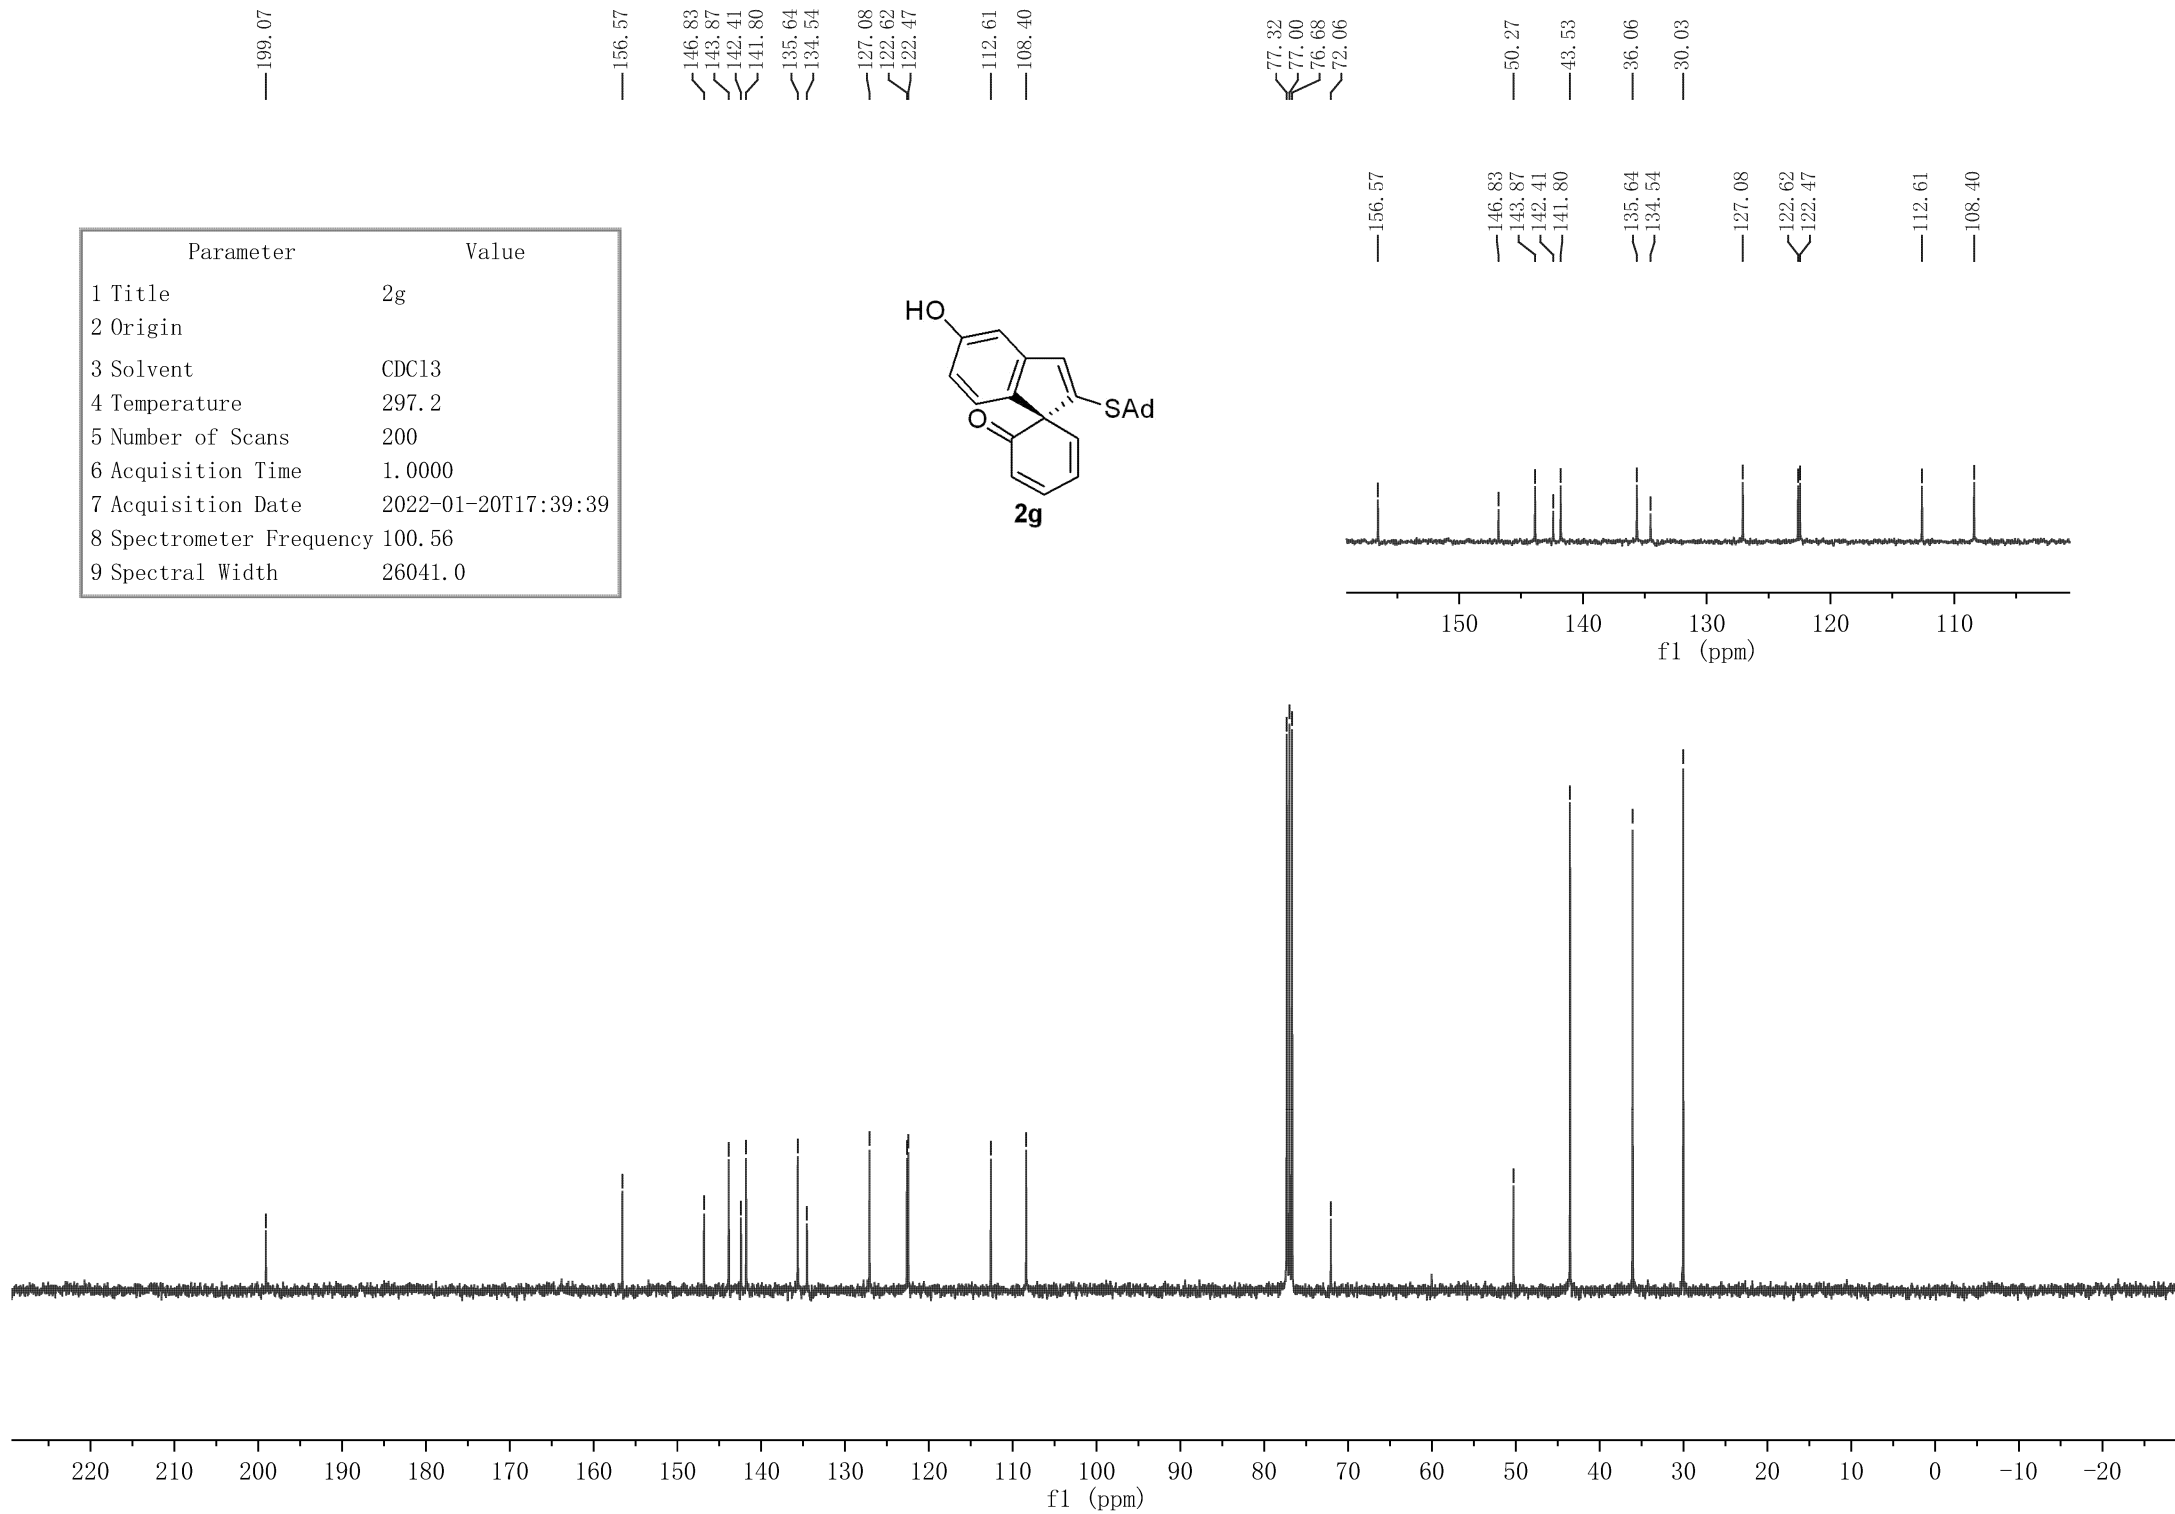



| Parameter                | Value               |
|--------------------------|---------------------|
| 1 Title                  | 2h                  |
| 2 Origin                 |                     |
| 3 Solvent                | CDC13               |
| 4 Temperature            | 297.5               |
| 5 Number of Scans        | 32                  |
| 6 Acquisition Time       | 4.0002              |
| 7 Acquisition Date       | 2022-01-19T01:05:47 |
| 8 Spectrometer Frequency | 399.93              |
| 9 Spectral Width         | 8012.0              |

7.170  
7.146  
7.140  
7.126  
6.911  
6.896  
6.874  
6.869  
6.691  
6.686  
6.670  
6.665  
6.472  
6.457  
6.449  
6.434  
6.174  
6.149  
5.873  
5.850

2.000  
1.953  
1.918  
1.884  
1.620

0.000

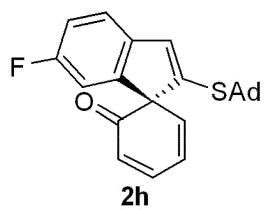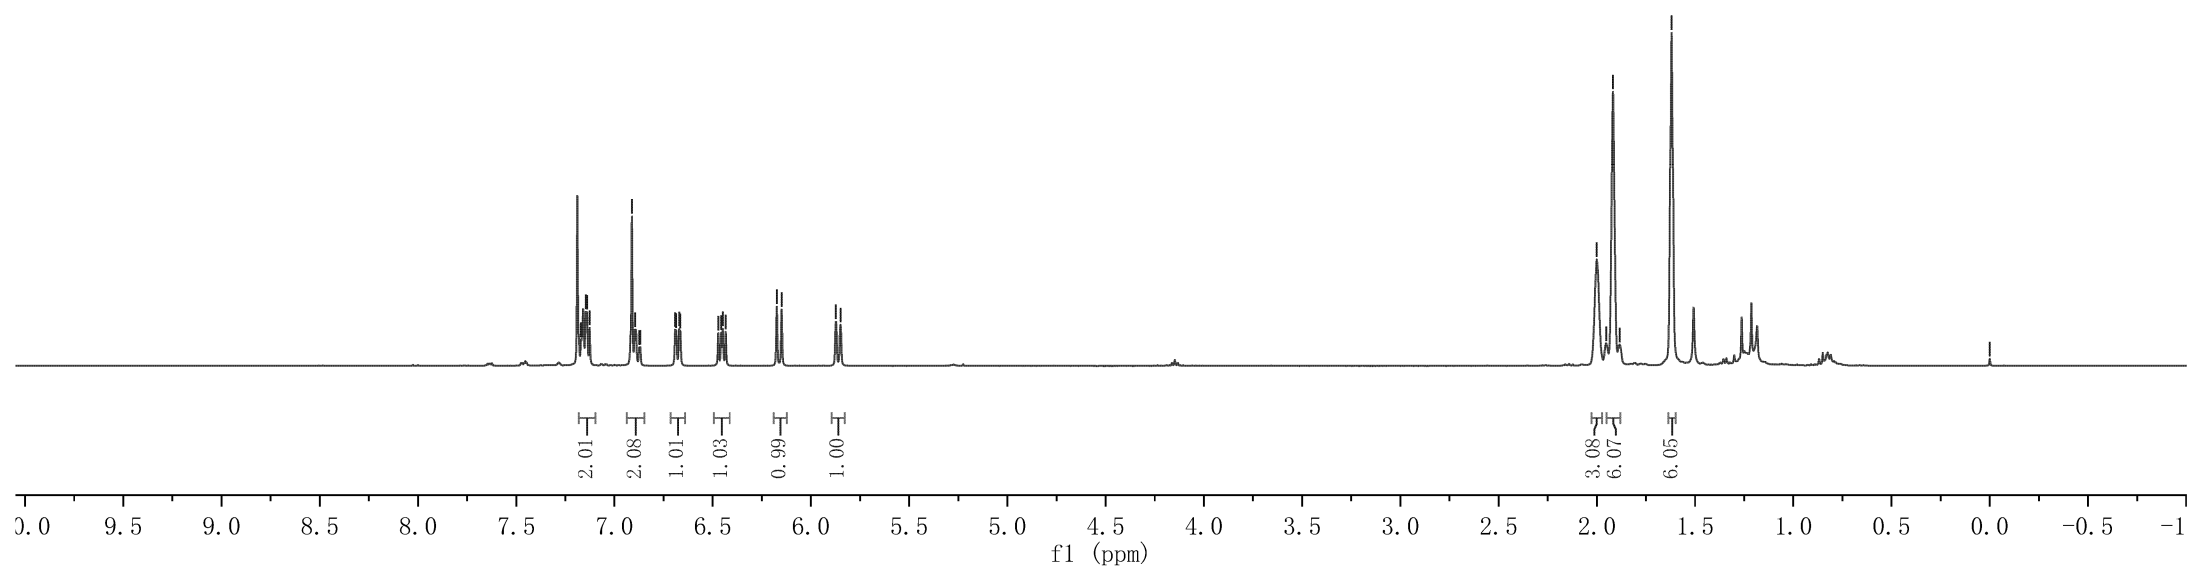

| Parameter                | Value               |
|--------------------------|---------------------|
| 1 Title                  | 2h                  |
| 2 Origin                 |                     |
| 3 Solvent                | CDC13               |
| 4 Temperature            | 297.8               |
| 5 Number of Scans        | 300                 |
| 6 Acquisition Time       | 1.0000              |
| 7 Acquisition Date       | 2022-01-19T01:00:56 |
| 8 Spectrometer Frequency | 100.56              |
| 9 Spectral Width         | 26041.0             |

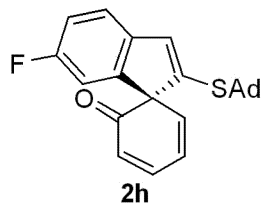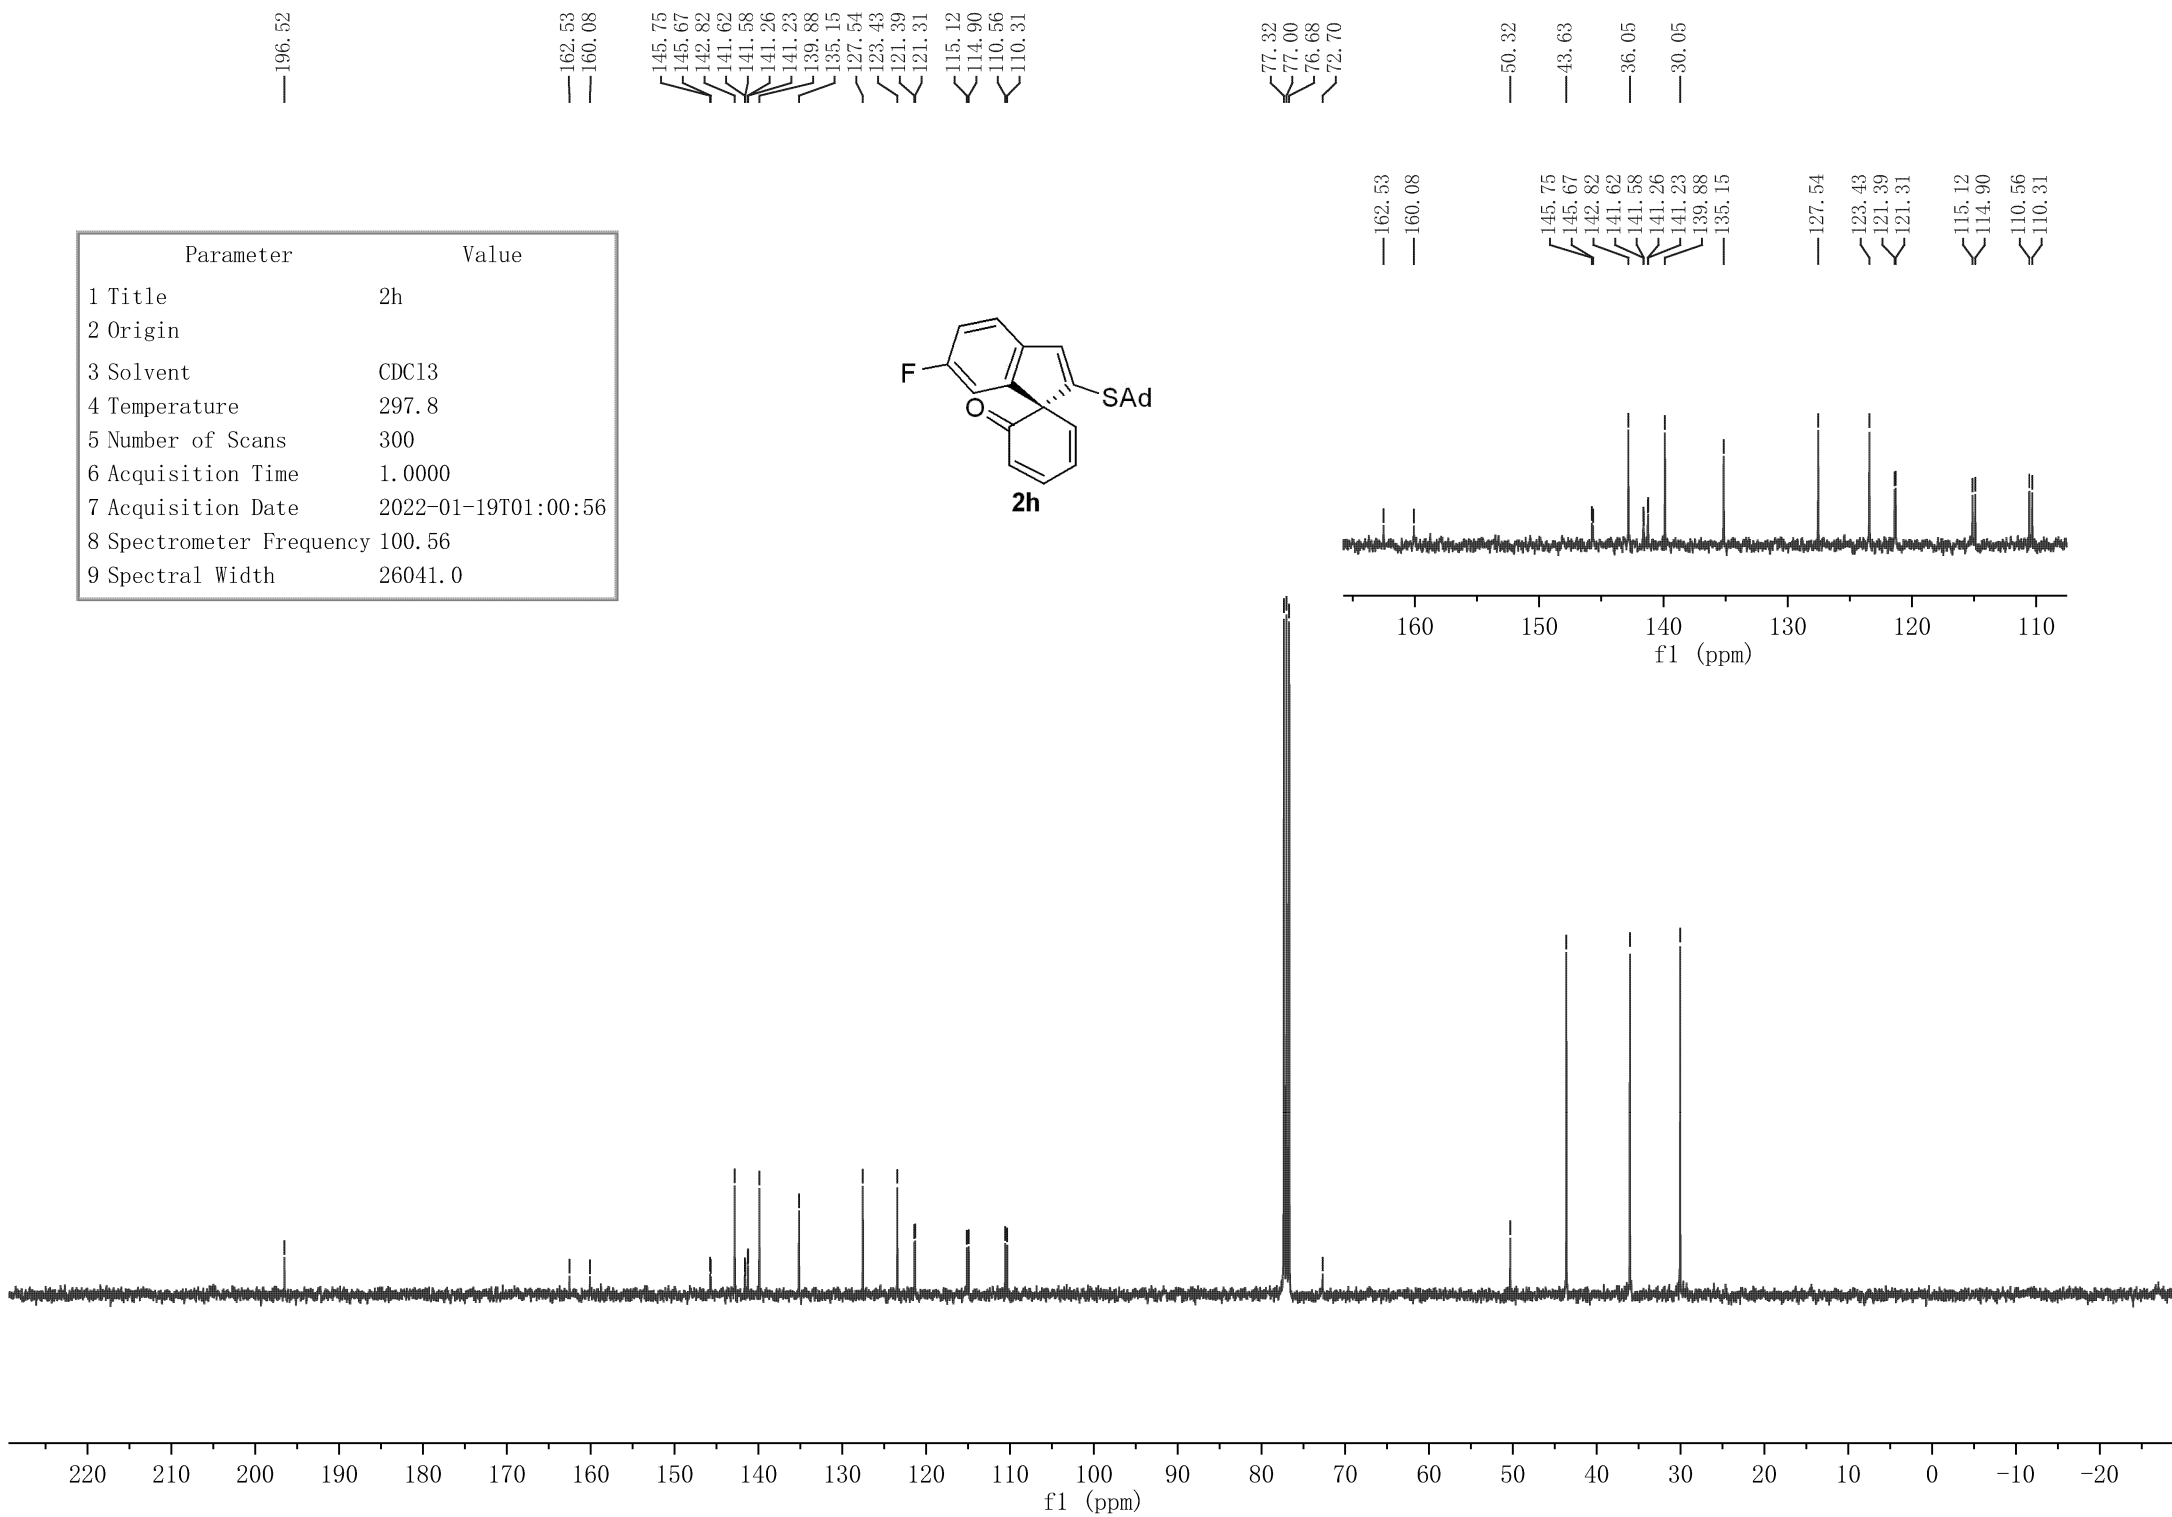

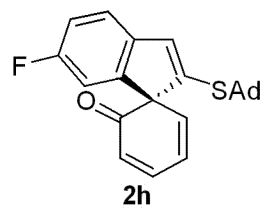

—116.04

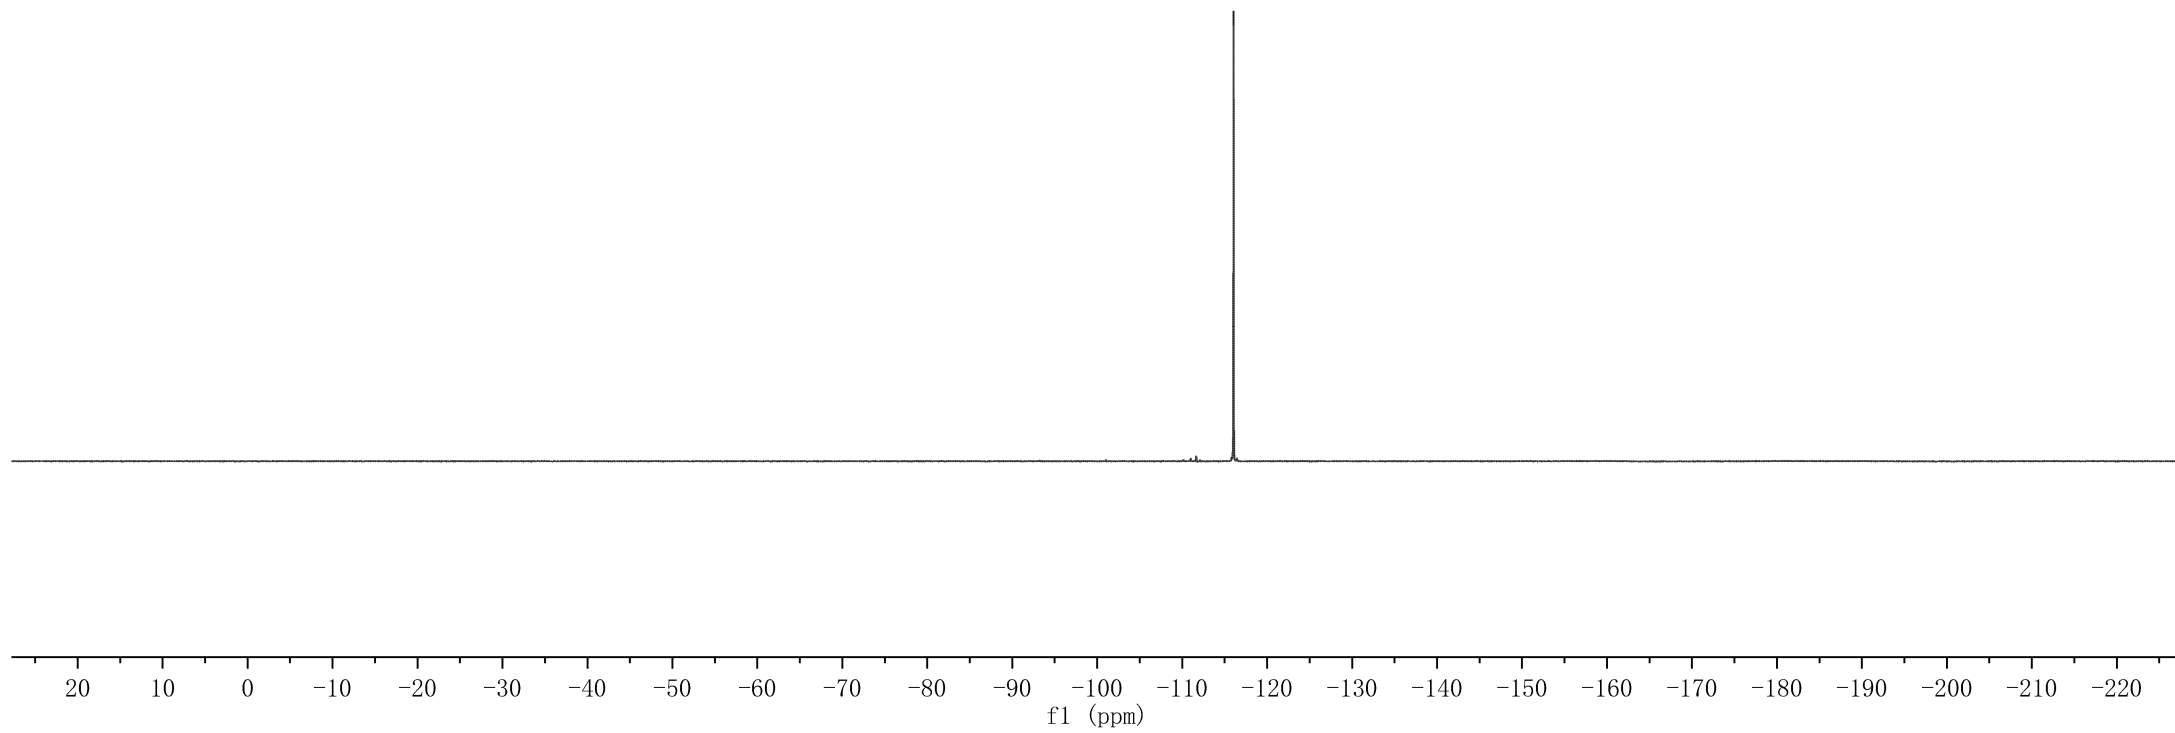

| Parameter                | Value               |
|--------------------------|---------------------|
| 1 Title                  | 2i                  |
| 2 Origin                 |                     |
| 3 Solvent                | CDC13               |
| 4 Temperature            | 299.6               |
| 5 Number of Scans        | 16                  |
| 6 Acquisition Time       | 4.0002              |
| 7 Acquisition Date       | 2023-08-17T21:12:11 |
| 8 Spectrometer Frequency | 399.90              |
| 9 Spectral Width         | 8012.0              |

7.236  
7.218  
7.188  
7.168  
6.985  
6.956  
6.520  
6.513  
6.498  
6.239  
6.215  
5.937  
5.914

2.075  
2.045  
2.006  
1.969  
1.696

0.000

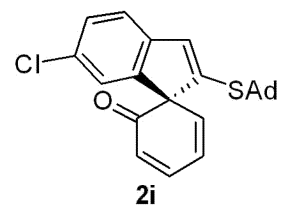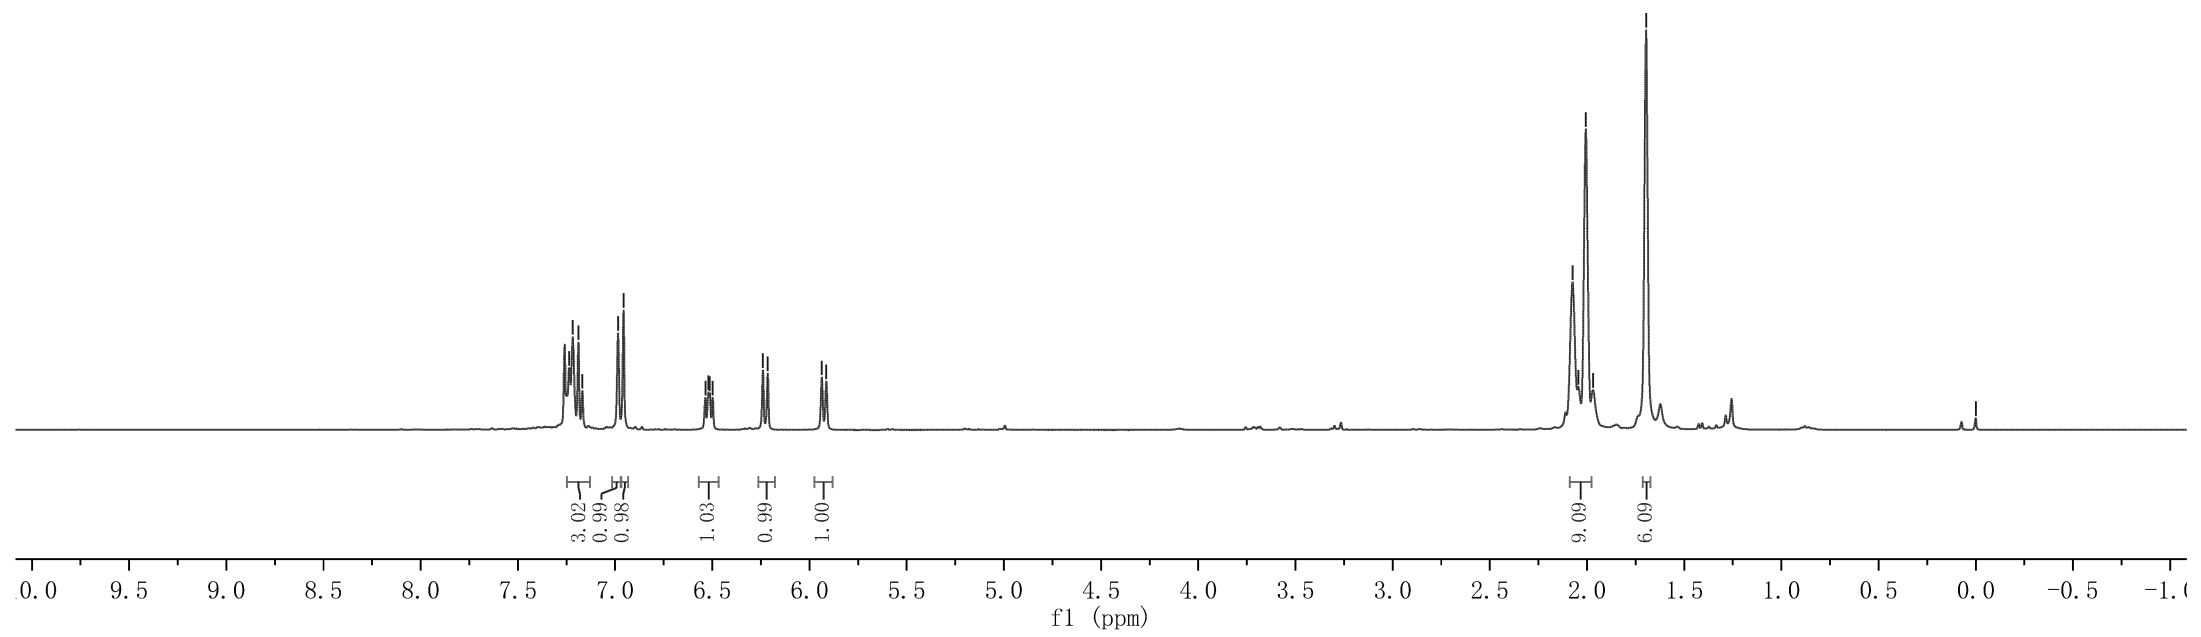

| Parameter                | Value               |
|--------------------------|---------------------|
| 1 Title                  | 2i                  |
| 2 Origin                 |                     |
| 3 Solvent                | CDC13               |
| 4 Temperature            | 299.6               |
| 5 Number of Scans        | 100                 |
| 6 Acquisition Time       | 1.0000              |
| 7 Acquisition Date       | 2023-08-17T21:32:12 |
| 8 Spectrometer Frequency | 100.56              |
| 9 Spectral Width         | 26041.0             |

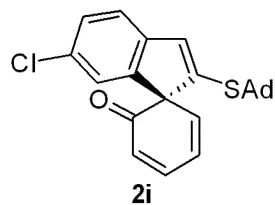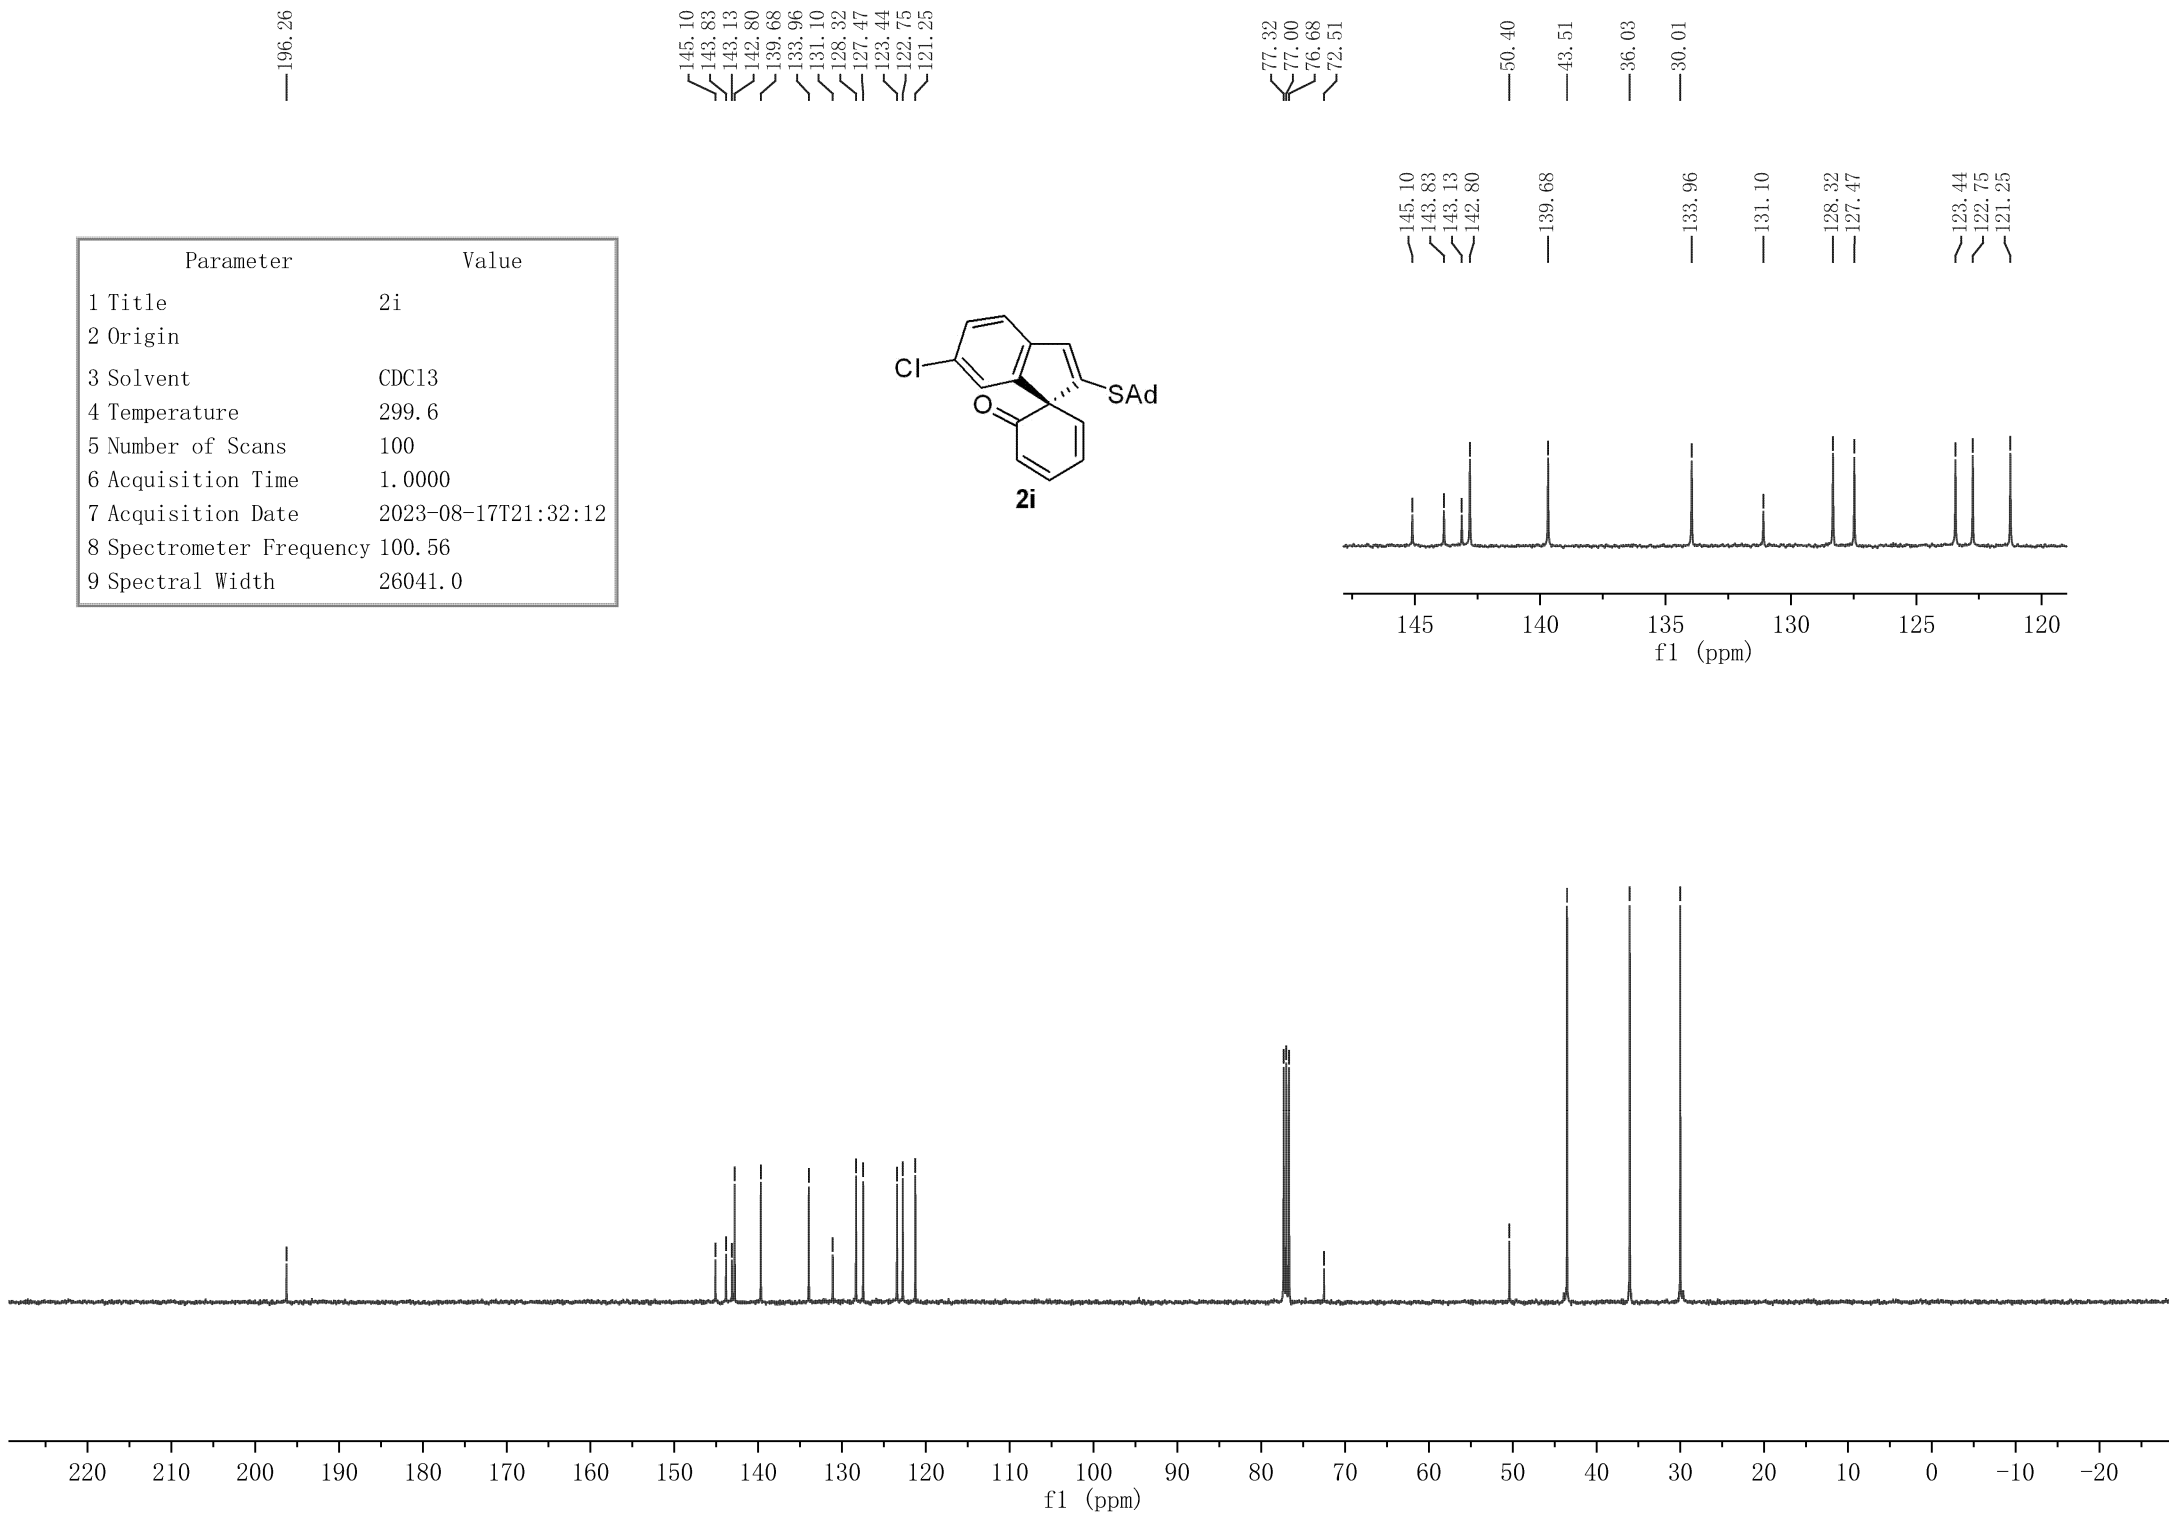

| Parameter                | Value               |
|--------------------------|---------------------|
| 1 Title                  | 2j                  |
| 2 Origin                 |                     |
| 3 Solvent                | CDC13               |
| 4 Temperature            | 299.3               |
| 5 Number of Scans        | 16                  |
| 6 Acquisition Time       | 4.0002              |
| 7 Acquisition Date       | 2023-08-19T01:46:31 |
| 8 Spectrometer Frequency | 399.90              |
| 9 Spectral Width         | 8012.0              |

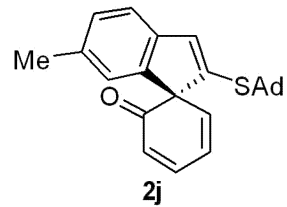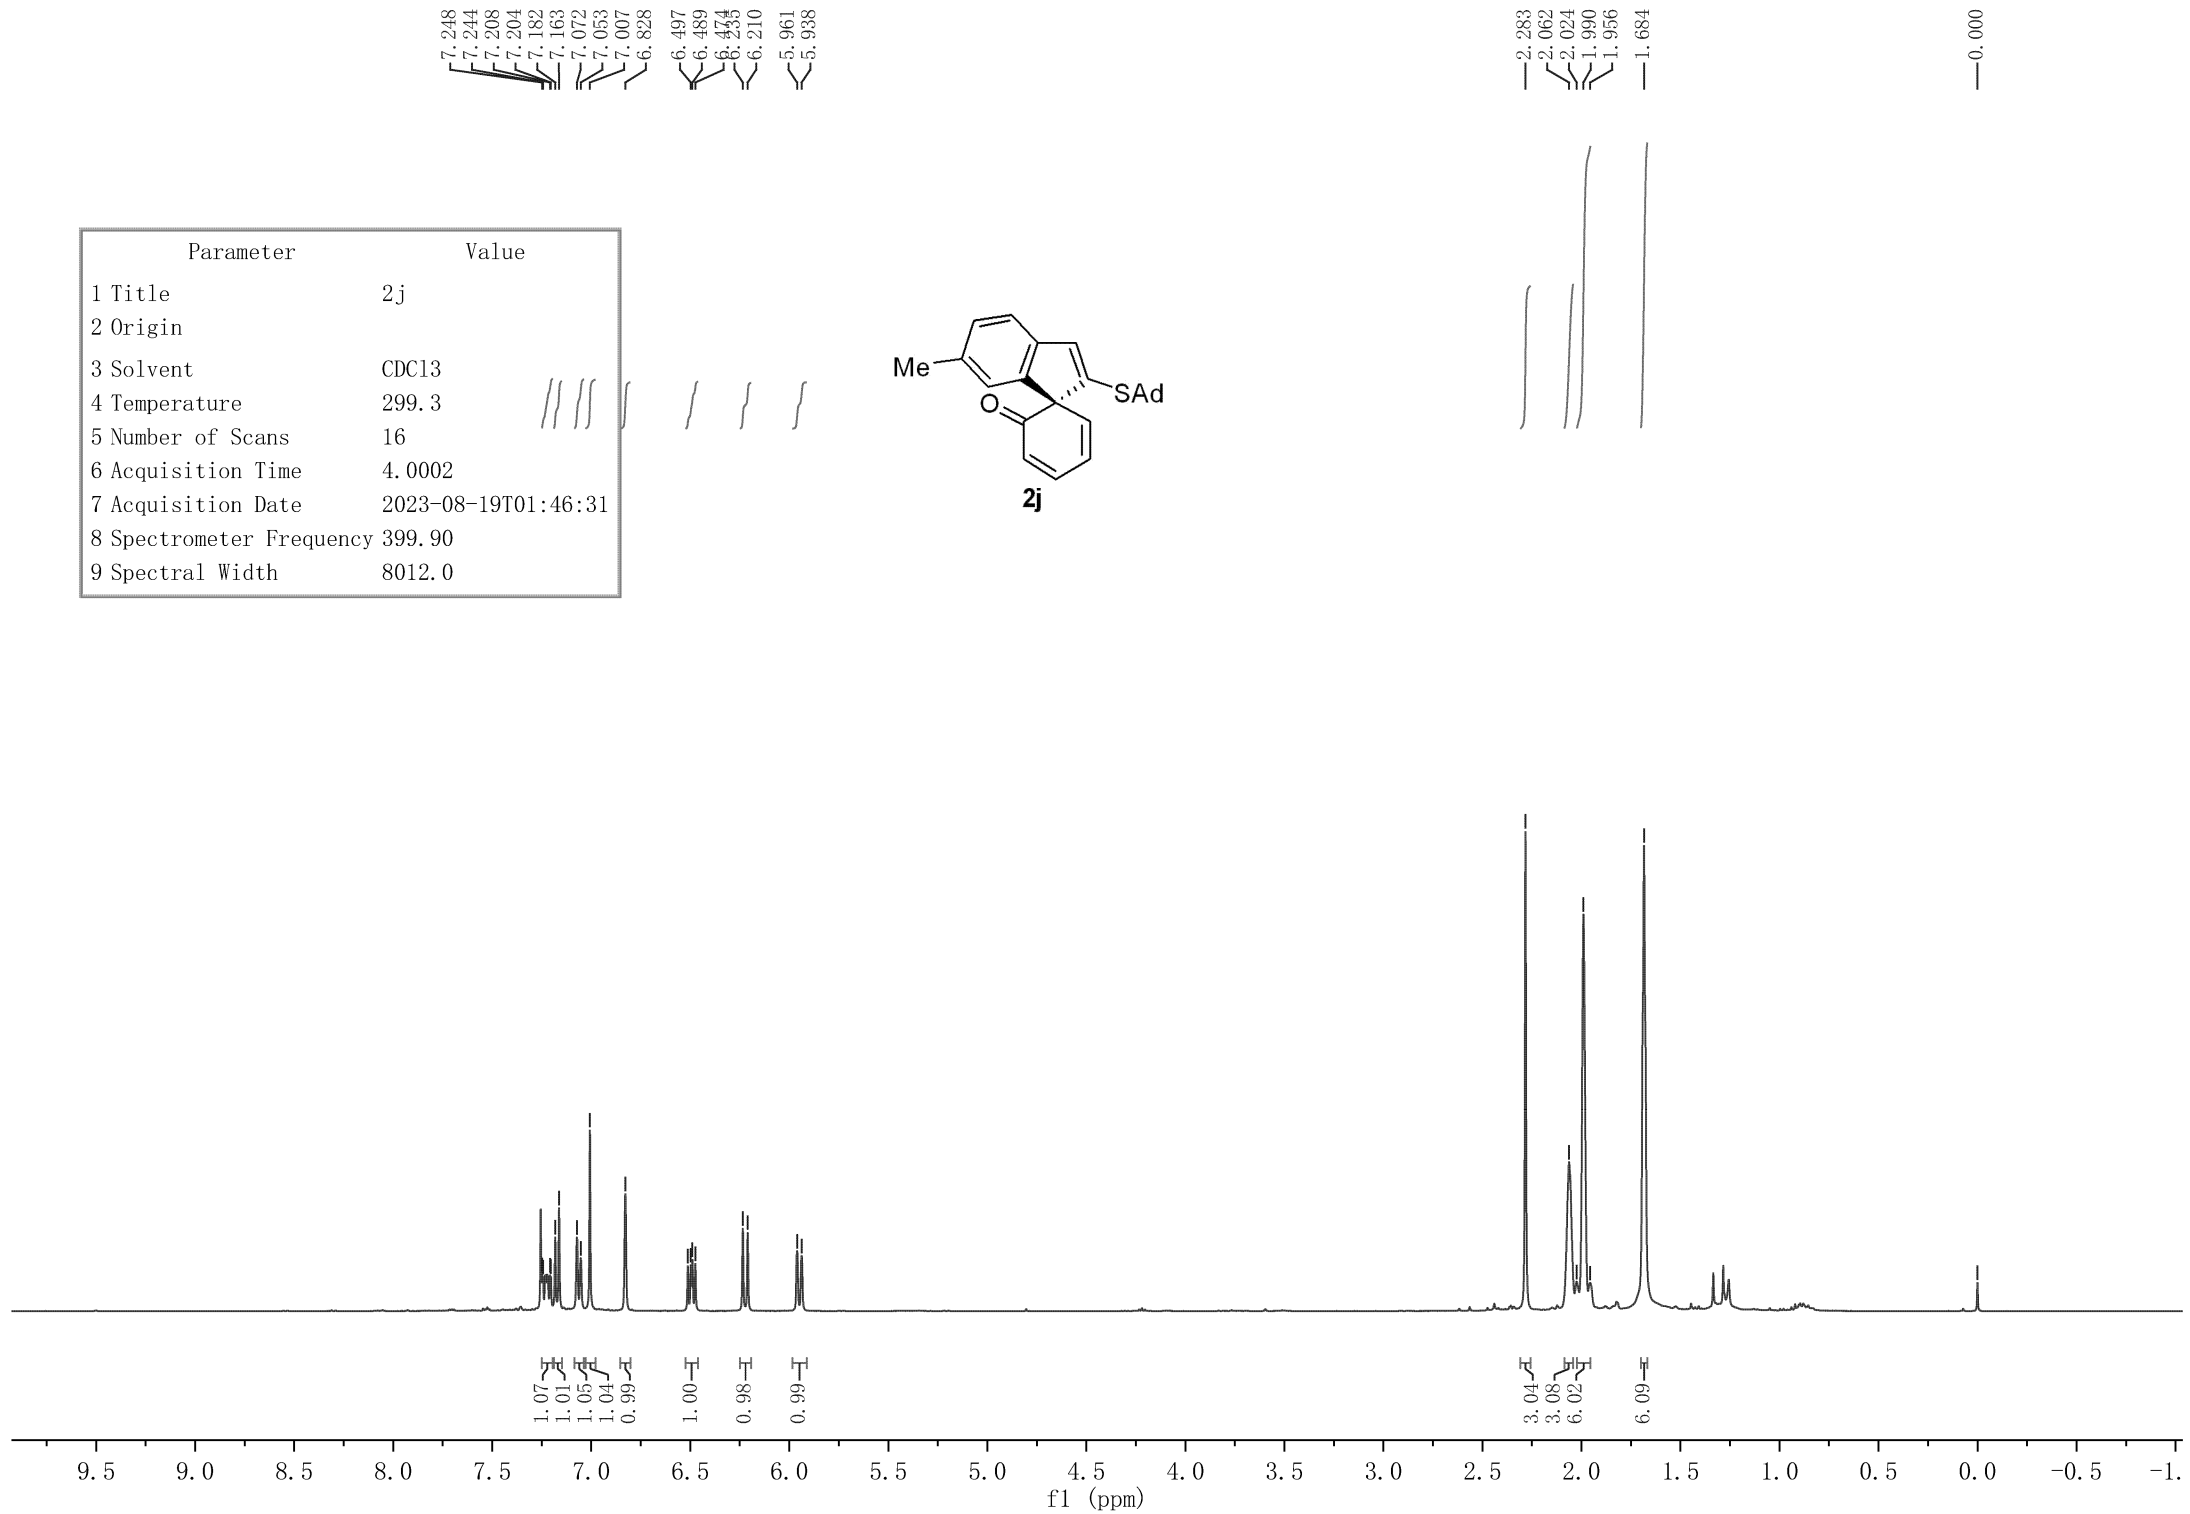

| Parameter                | Value               |
|--------------------------|---------------------|
| 1 Title                  | 2j                  |
| 2 Origin                 |                     |
| 3 Solvent                | CDC13               |
| 4 Temperature            | 299.6               |
| 5 Number of Scans        | 200                 |
| 6 Acquisition Time       | 1.0000              |
| 7 Acquisition Date       | 2023-08-19T02:05:49 |
| 8 Spectrometer Frequency | 100.56              |
| 9 Spectral Width         | 26041.0             |

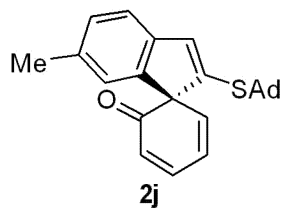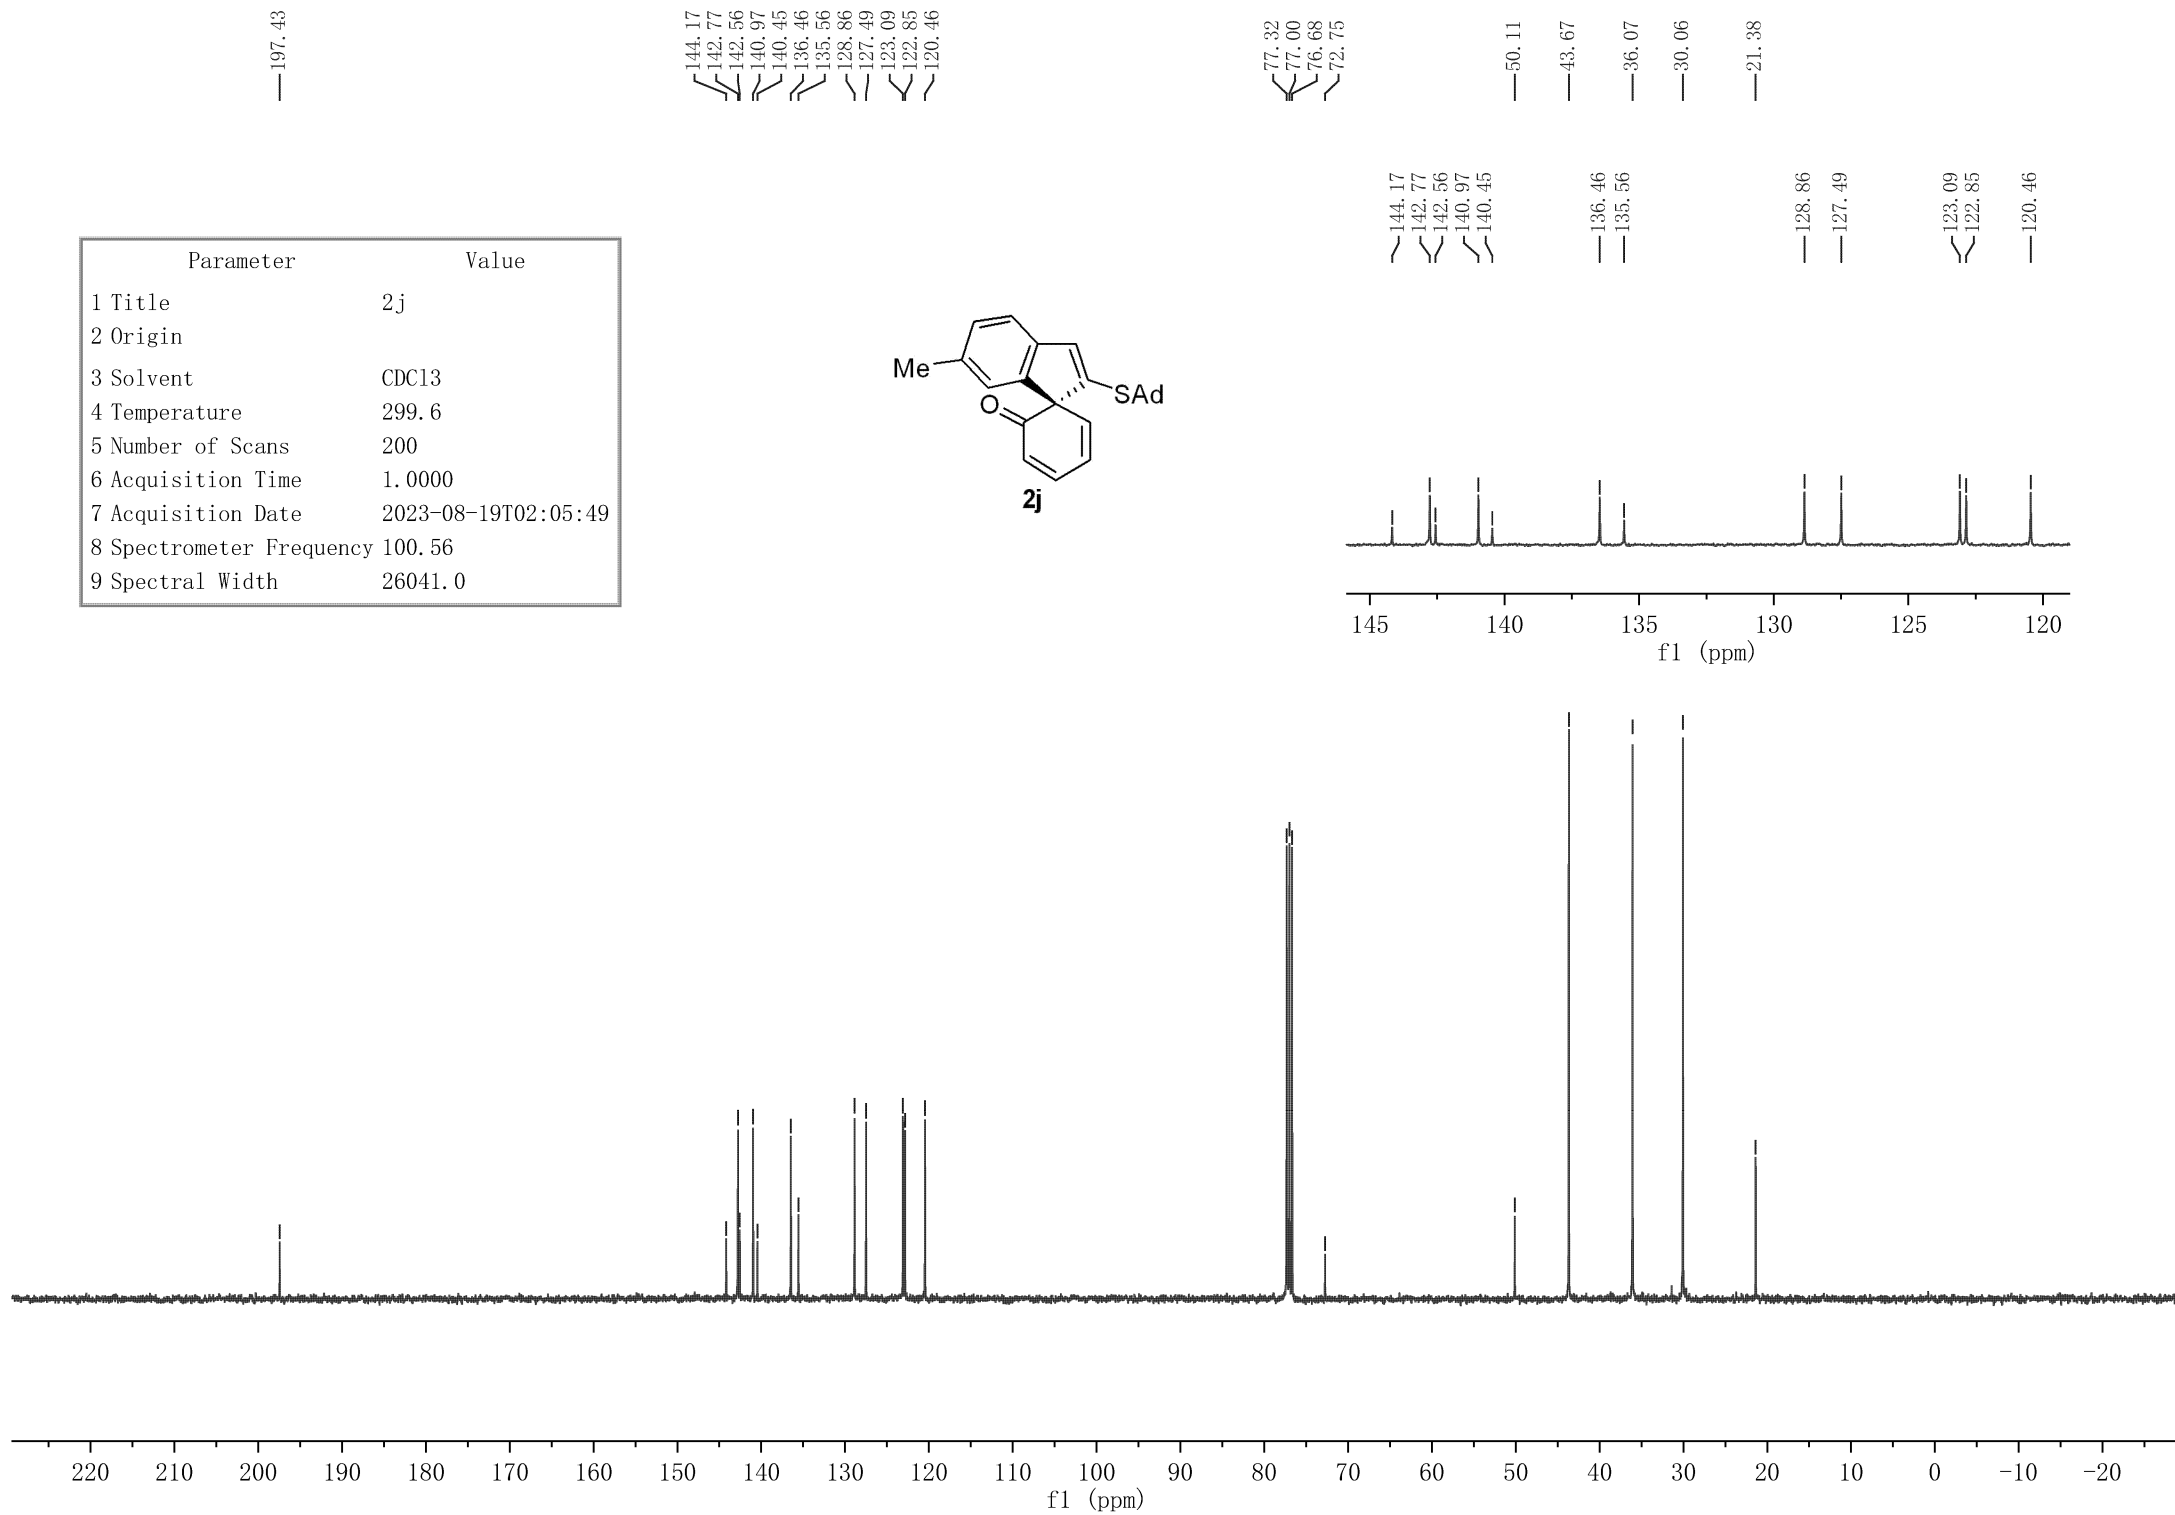

| Parameter                | Value               |
|--------------------------|---------------------|
| 1 Title                  | FXY-2k              |
| 2 Origin                 |                     |
| 3 Solvent                | CDC13               |
| 4 Temperature            | 299.9               |
| 5 Number of Scans        | 16                  |
| 6 Acquisition Time       | 4.0002              |
| 7 Acquisition Date       | 2023-08-09T21:52:09 |
| 8 Spectrometer Frequency | 399.90              |
| 9 Spectral Width         | 8012.0              |

7.240  
7.219  
7.208  
7.187  
7.001  
6.820  
6.814  
6.799  
6.794  
6.597  
6.592  
6.517  
6.502  
6.494  
6.479  
6.231  
6.207  
5.958  
5.935

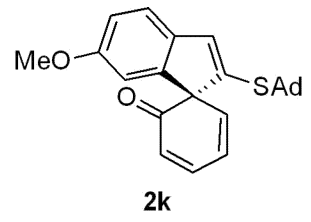

3.740  
2.055  
1.963  
1.675  
-0.000

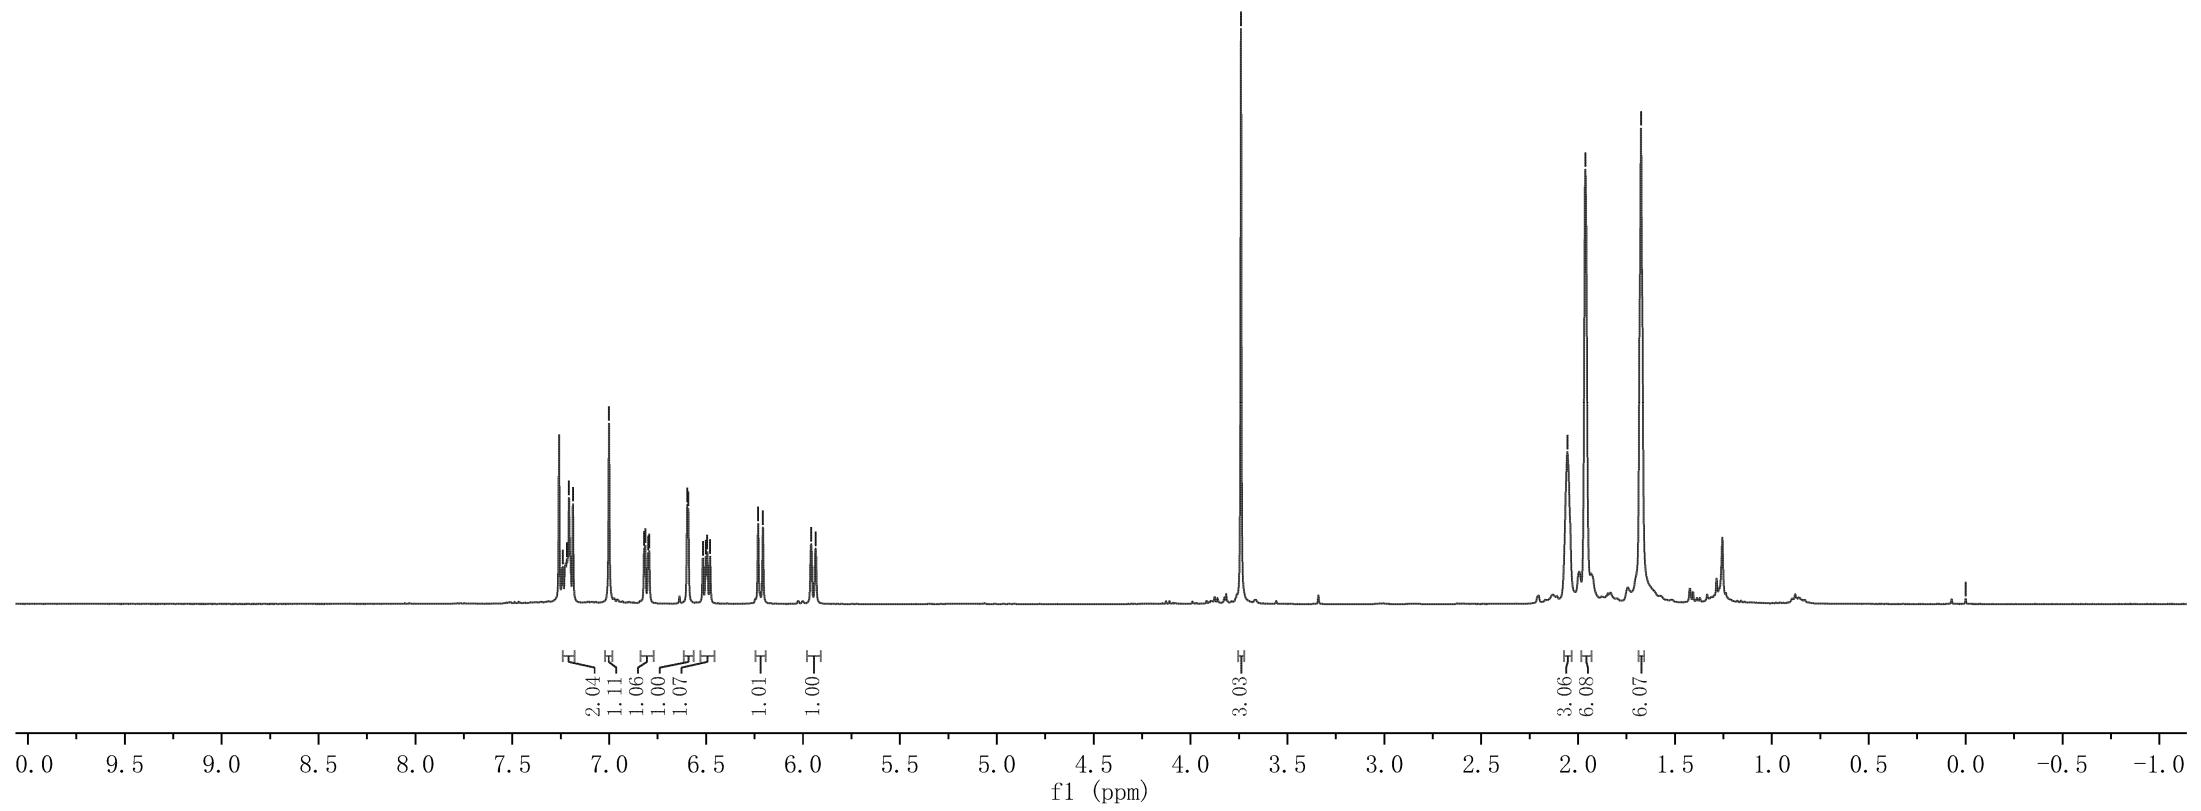



| Parameter                | Value               |
|--------------------------|---------------------|
| 1 Title                  | FXY-2k              |
| 2 Origin                 |                     |
| 3 Solvent                | CDC13               |
| 4 Temperature            | 300.3               |
| 5 Number of Scans        | 300                 |
| 6 Acquisition Time       | 1.0000              |
| 7 Acquisition Date       | 2023-08-09T22:05:01 |
| 8 Spectrometer Frequency | 100.56              |
| 9 Spectral Width         | 26041.0             |

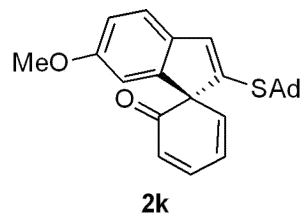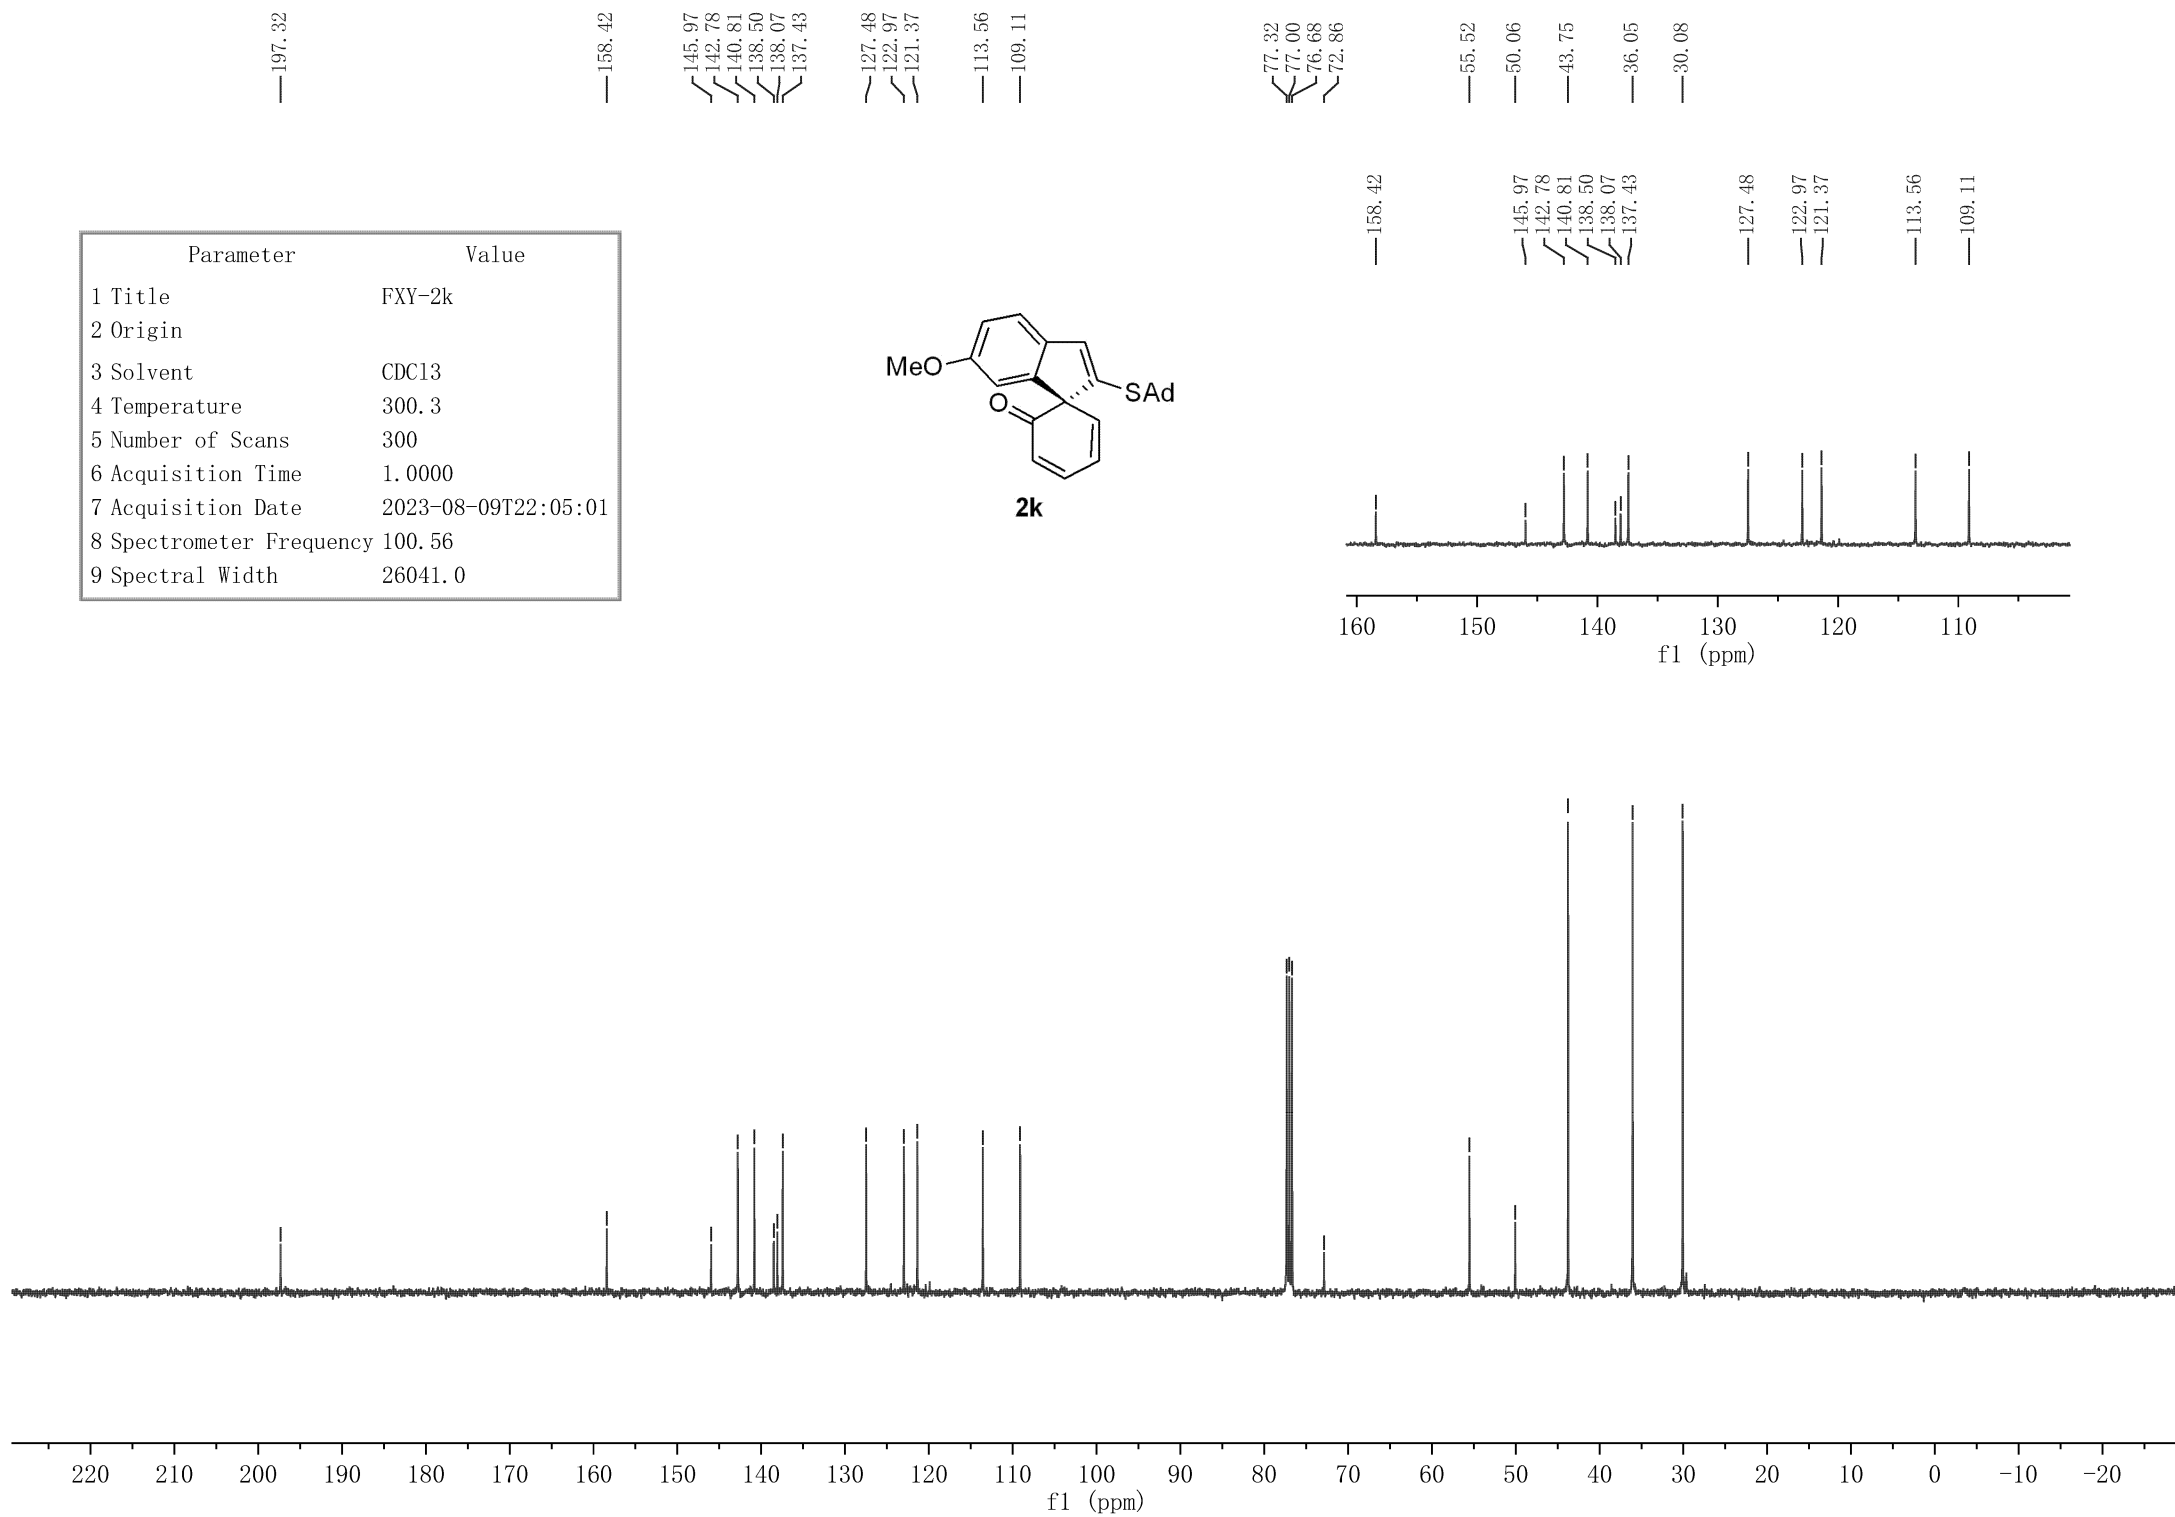

| Parameter                | Value               |
|--------------------------|---------------------|
| 1 Title                  | FXY-7-136-h         |
| 2 Origin                 |                     |
| 3 Solvent                | CDC13               |
| 4 Temperature            | 297.1               |
| 5 Number of Scans        | 16                  |
| 6 Acquisition Time       | 4.0002              |
| 7 Acquisition Date       | 2022-02-26T15:50:52 |
| 8 Spectrometer Frequency | 399.93              |
| 9 Spectral Width         | 8012.0              |

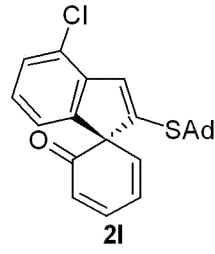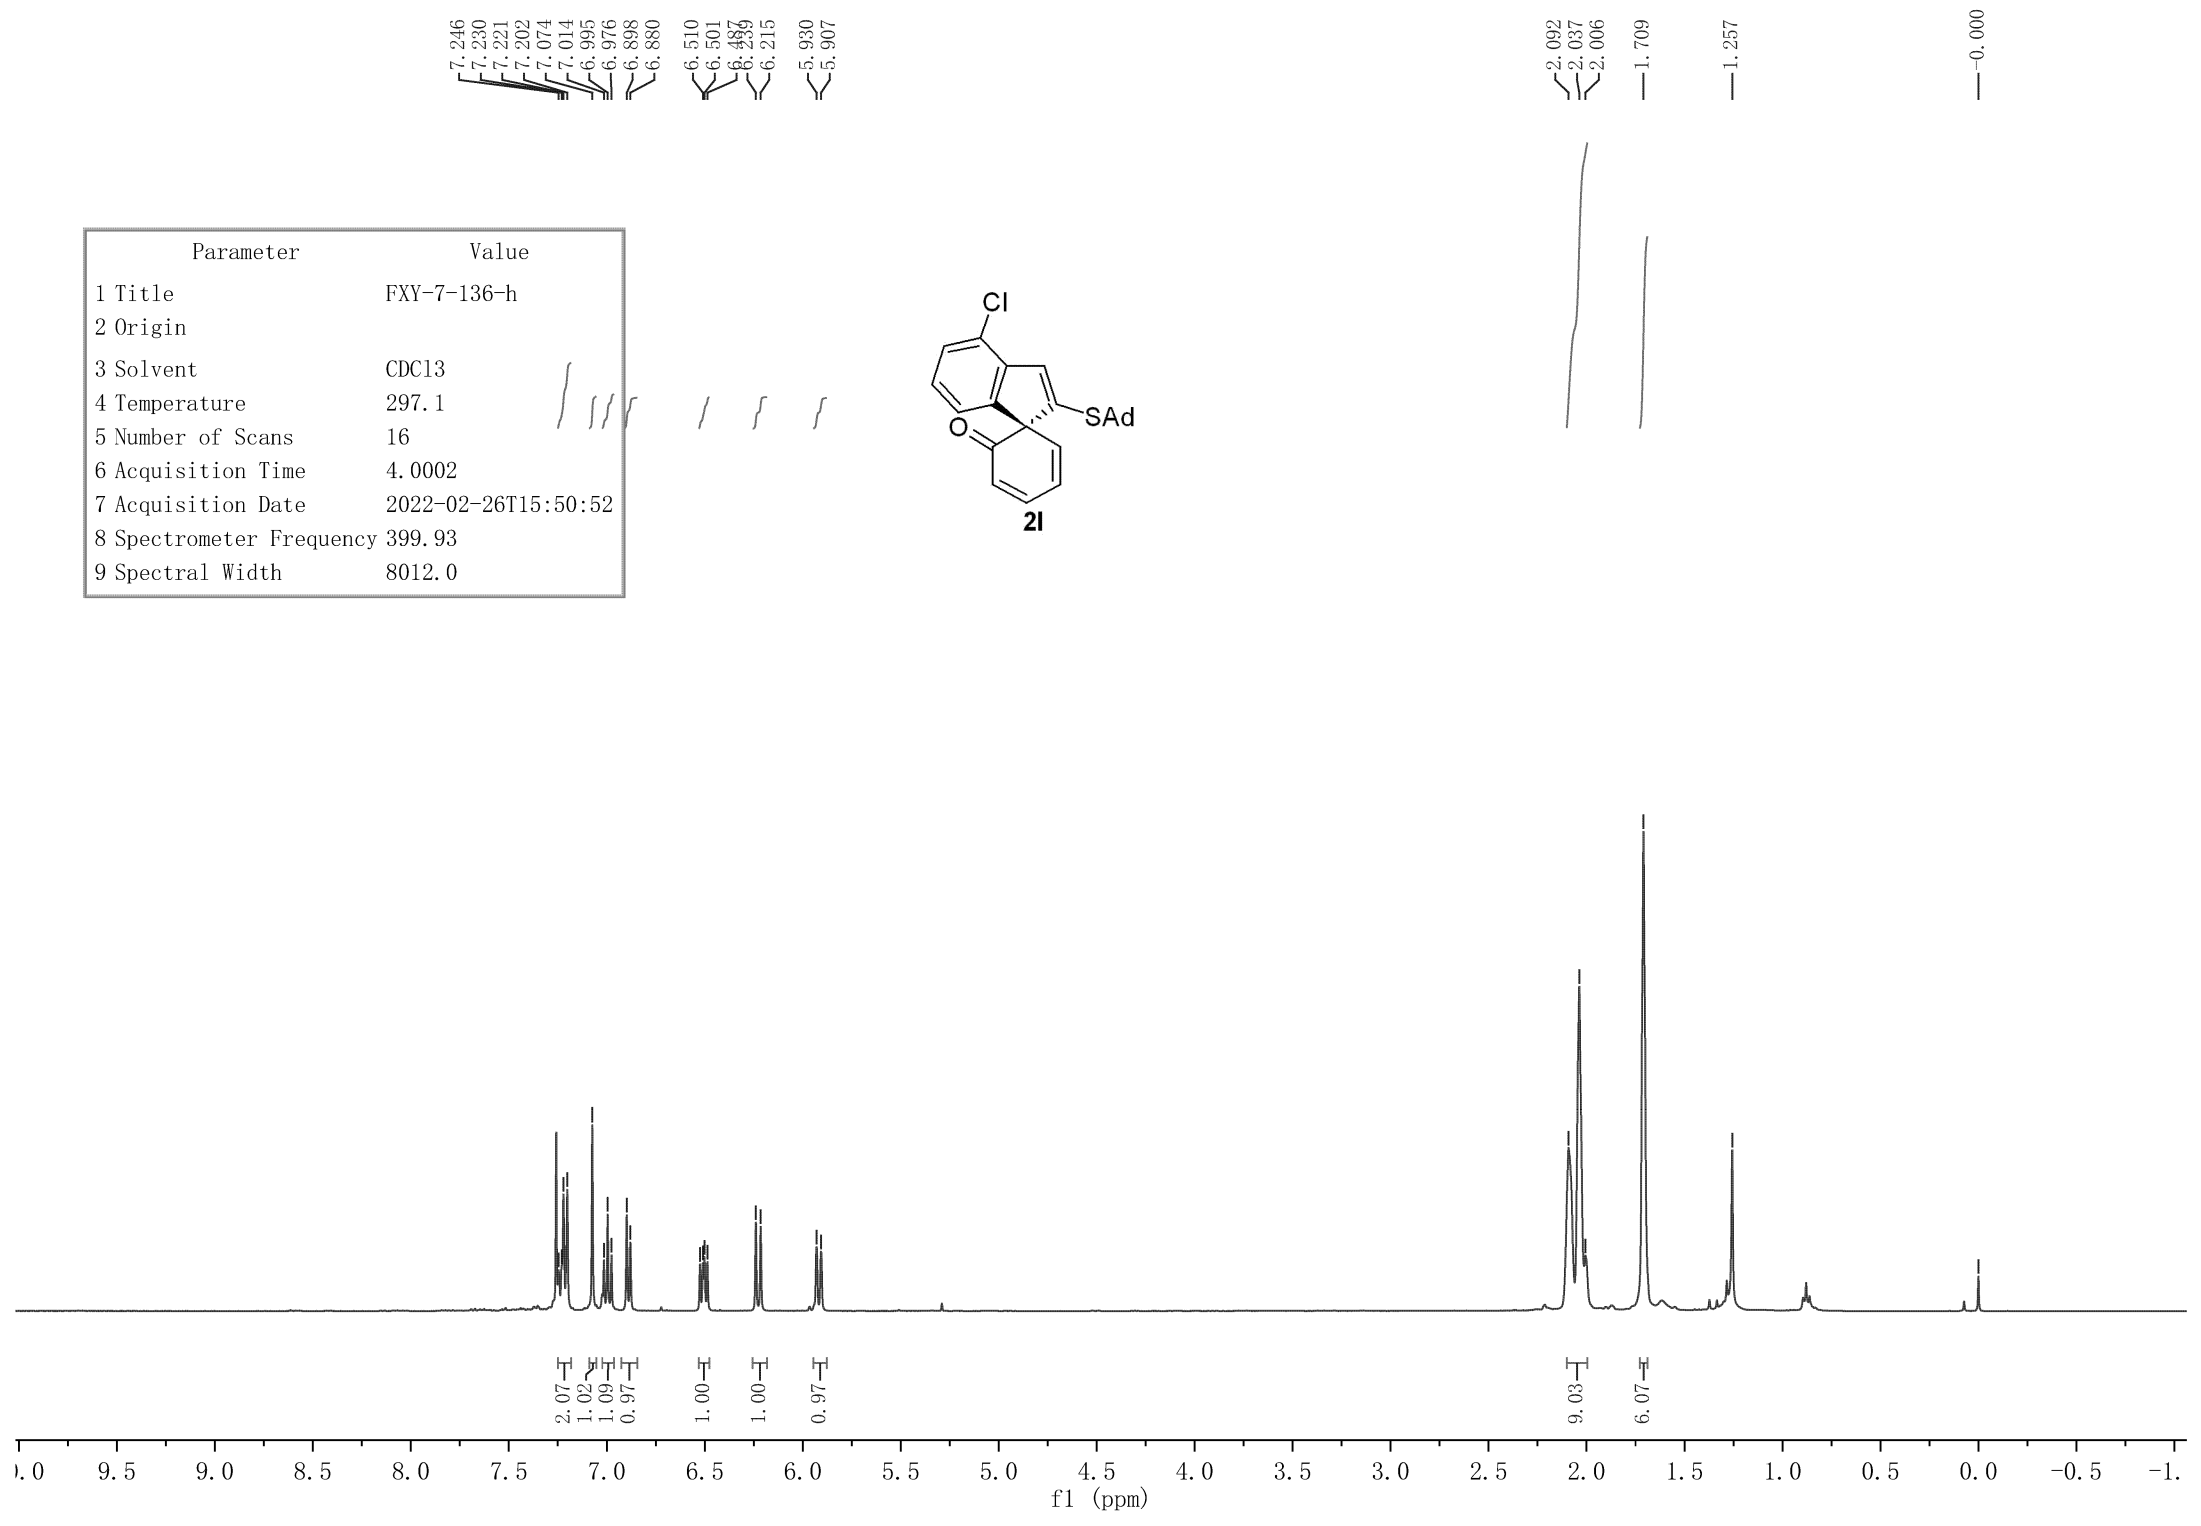

| Parameter                | Value               |
|--------------------------|---------------------|
| 1 Title                  | FXY-7-136-c         |
| 2 Origin                 |                     |
| 3 Solvent                | CDC13               |
| 4 Temperature            | 297.1               |
| 5 Number of Scans        | 300                 |
| 6 Acquisition Time       | 1.0000              |
| 7 Acquisition Date       | 2022-02-26T16:03:10 |
| 8 Spectrometer Frequency | 100.56              |
| 9 Spectral Width         | 26041.0             |

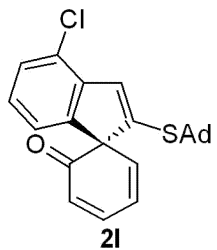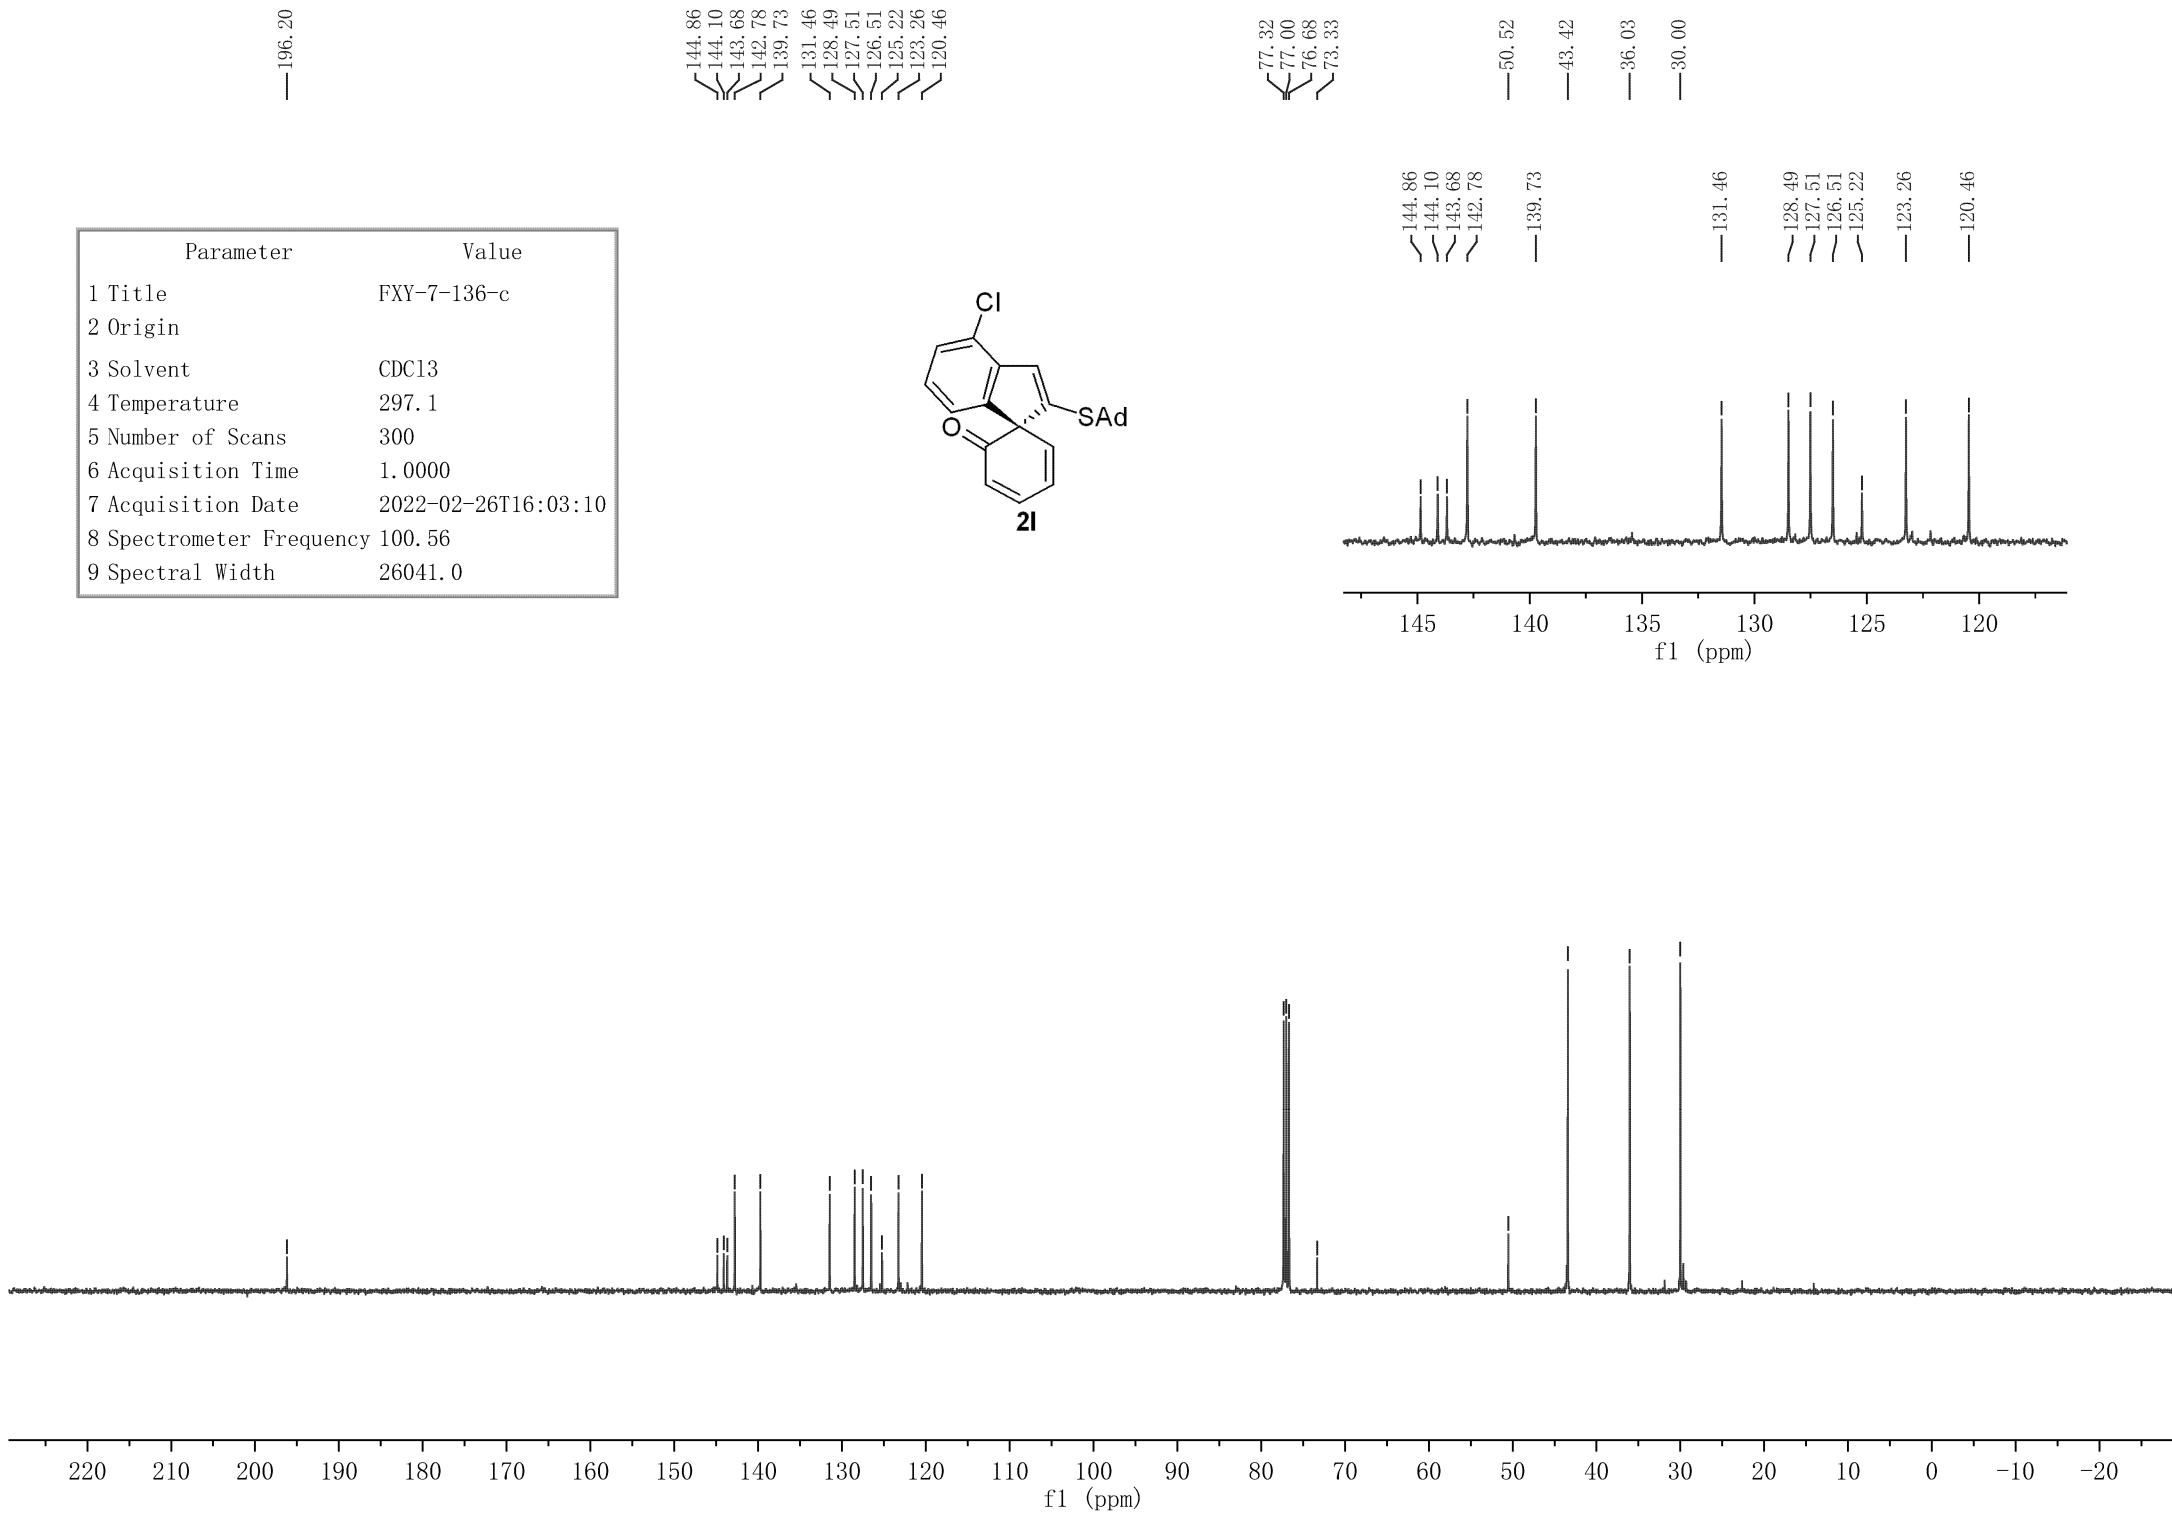

| Parameter                | Value               |
|--------------------------|---------------------|
| 1 Title                  | FXY-8-119-H         |
| 2 Origin                 |                     |
| 3 Solvent                | CDC13               |
| 4 Temperature            | 298.4               |
| 5 Number of Scans        | 16                  |
| 6 Acquisition Time       | 4.0002              |
| 7 Acquisition Date       | 2022-05-18T19:00:38 |
| 8 Spectrometer Frequency | 399.92              |
| 9 Spectral Width         | 8012.0              |

7.295  
7.283  
7.277  
7.269  
7.142  
7.116  
7.090  
7.084  
7.063  
7.044  
6.996  
6.251  
6.240  
6.225  
6.214

5.474  
5.466  
5.450  
5.442

2.079  
2.005  
1.998  
1.990  
1.961  
1.698

0.000

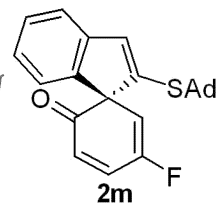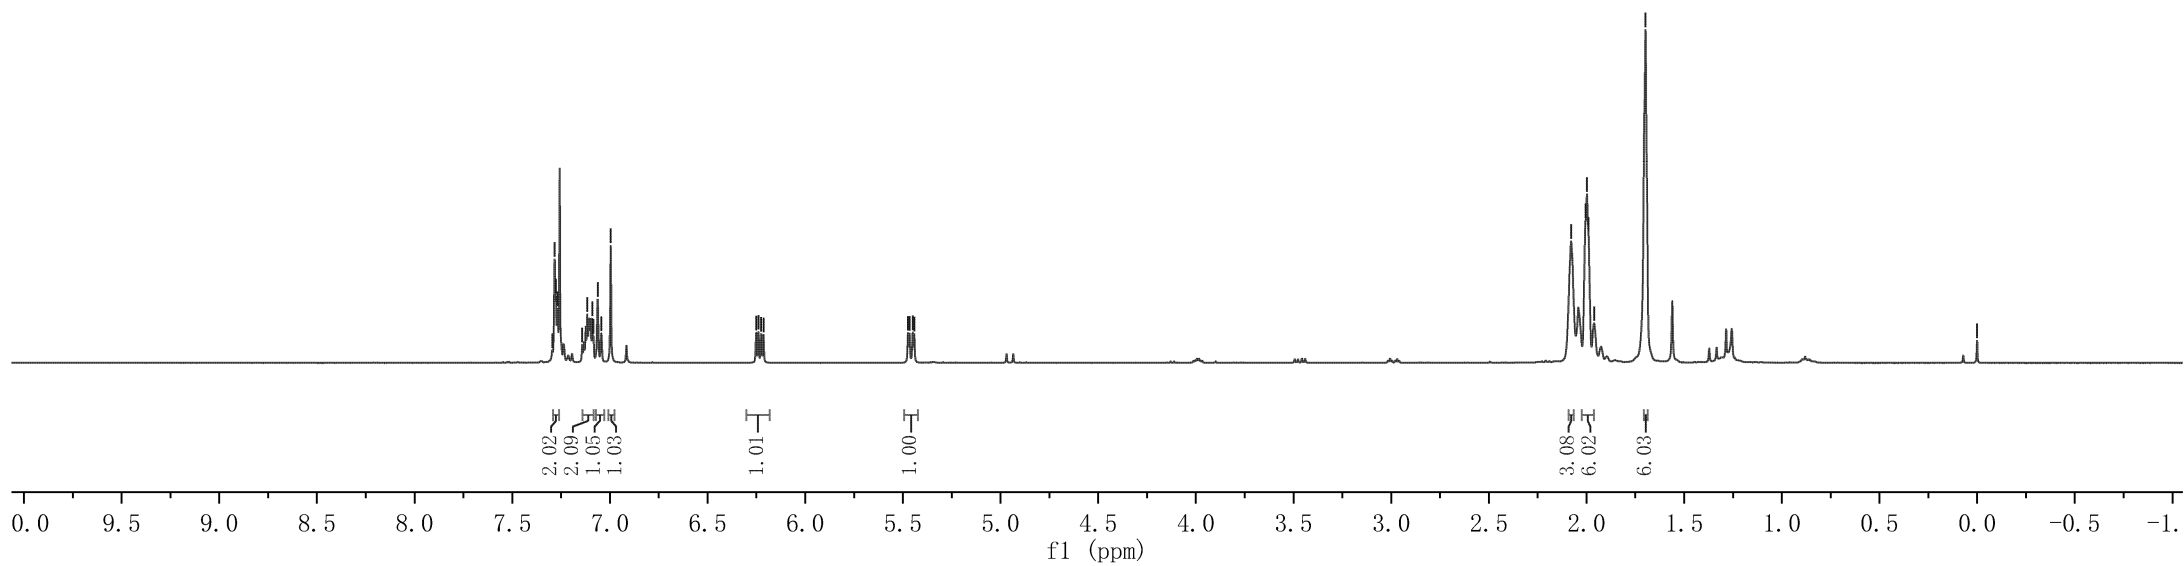

| Parameter                | Value               |
|--------------------------|---------------------|
| 1 Title                  | FXY-8-119-C         |
| 2 Origin                 |                     |
| 3 Solvent                | CDC13               |
| 4 Temperature            | 298.5               |
| 5 Number of Scans        | 500                 |
| 6 Acquisition Time       | 1.0000              |
| 7 Acquisition Date       | 2022-05-18T19:36:52 |
| 8 Spectrometer Frequency | 100.56              |
| 9 Spectral Width         | 26041.0             |

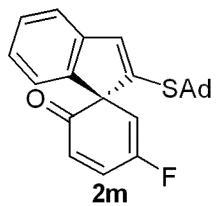

195.60  
195.59

157.19  
154.69  
144.86  
144.20  
144.17  
142.54  
142.51  
138.57  
138.20  
135.61  
129.57  
129.49  
128.47  
125.71  
122.34  
120.87  
114.28  
114.09

77.32  
77.00  
76.68  
70.44  
70.36

50.38

43.64

36.06

30.06

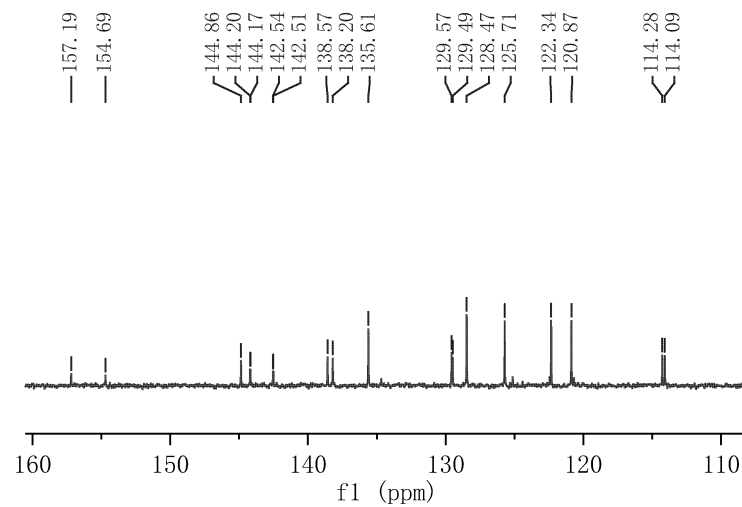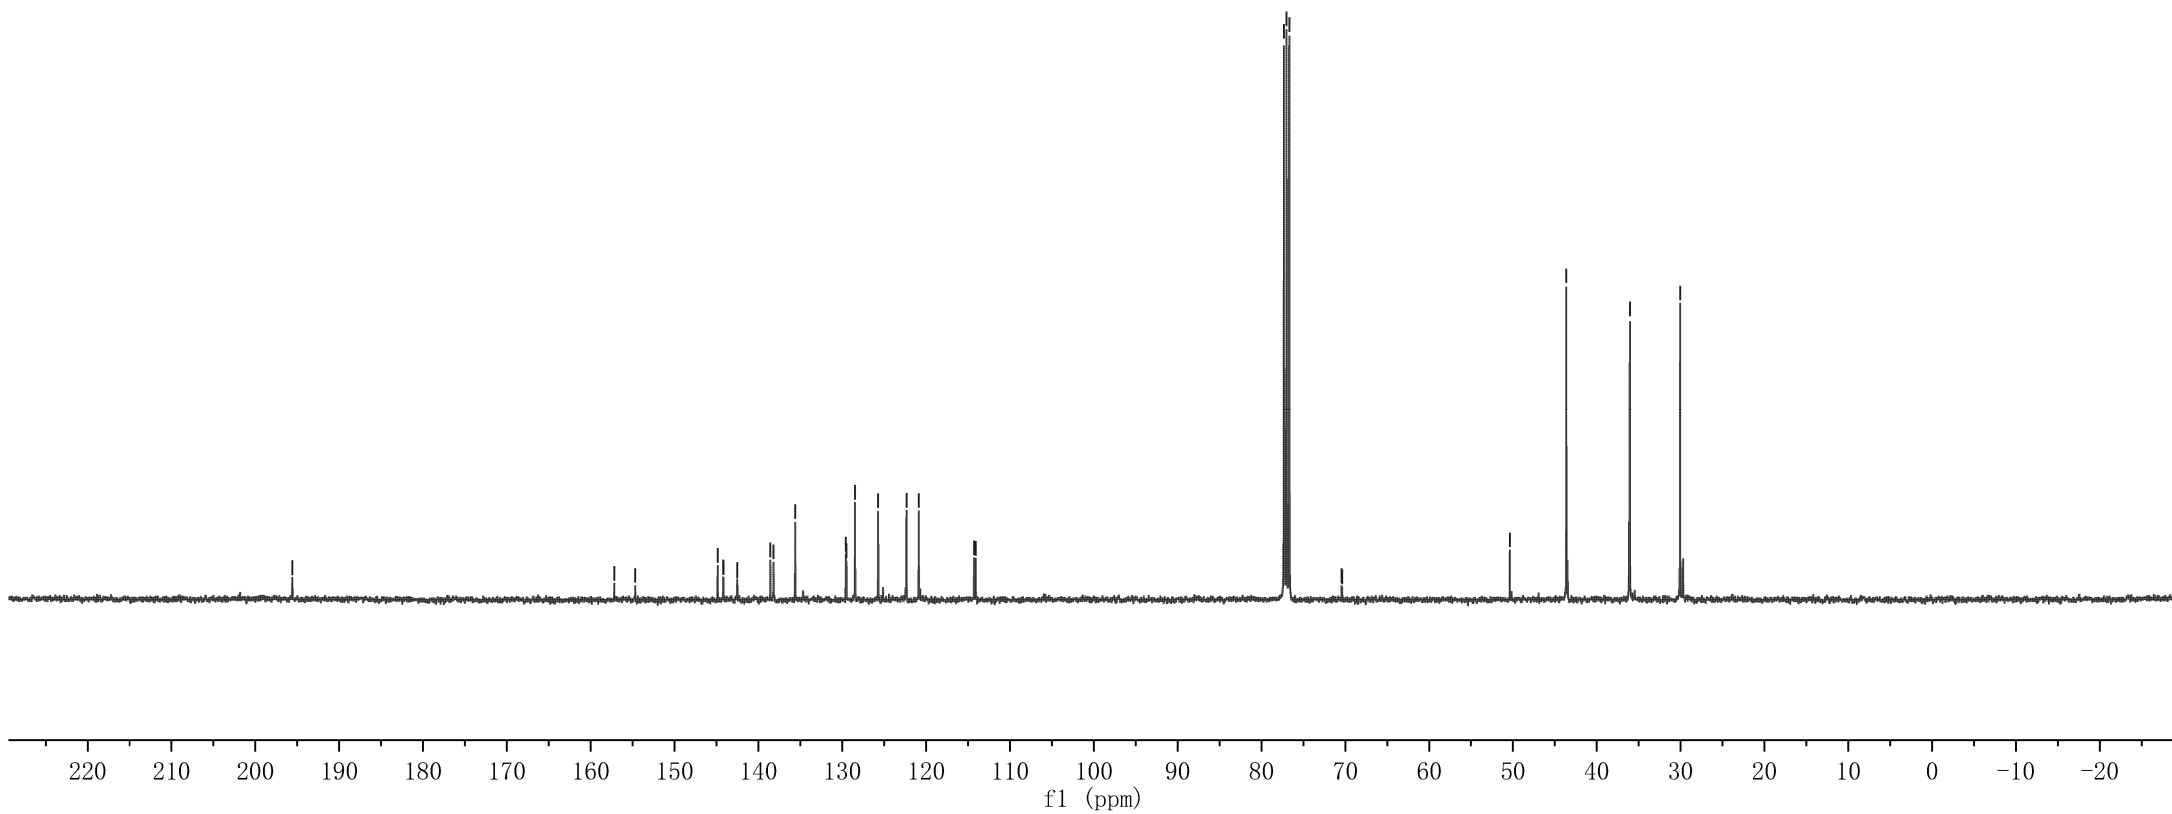

157.19  
154.69

144.86  
144.20  
144.17  
142.54  
142.51  
138.57  
138.20  
135.61

129.57  
129.49  
128.47  
125.71  
122.34  
120.87

114.28  
114.09

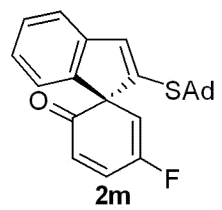

—115.23

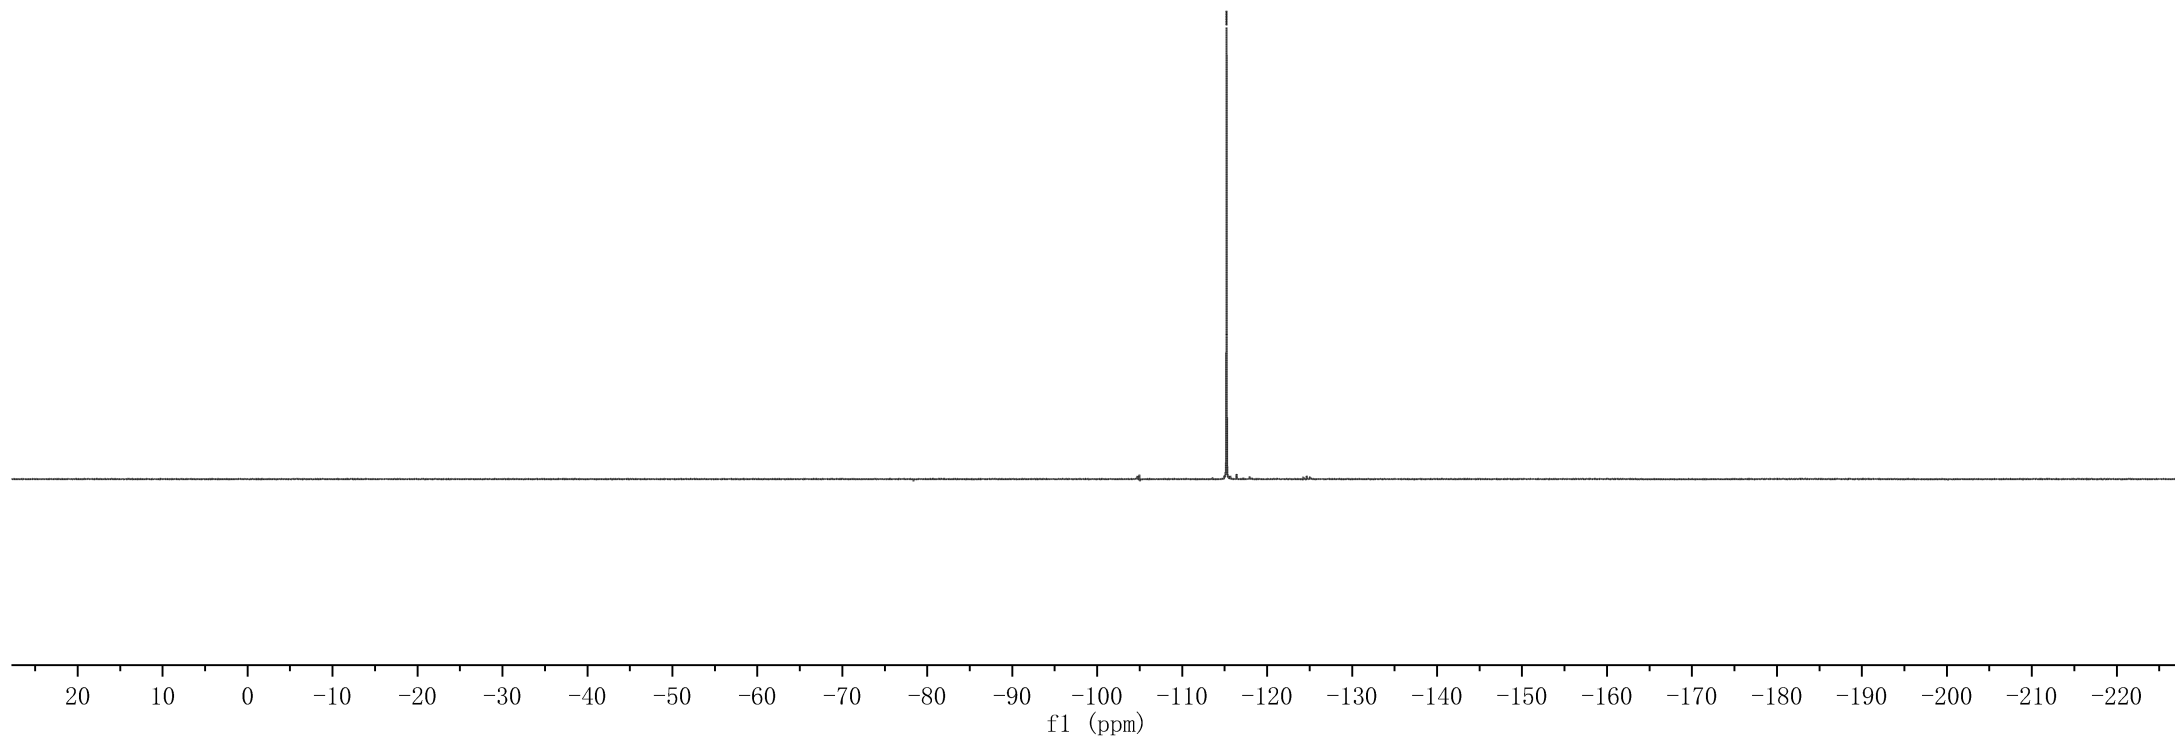

| Parameter                | Value               |
|--------------------------|---------------------|
| 1 Title                  | 2n                  |
| 2 Origin                 |                     |
| 3 Solvent                | CDC13               |
| 4 Temperature            | 297.6               |
| 5 Number of Scans        | 16                  |
| 6 Acquisition Time       | 4.0002              |
| 7 Acquisition Date       | 2022-03-03T21:13:54 |
| 8 Spectrometer Frequency | 399.93              |
| 9 Spectral Width         | 8012.0              |

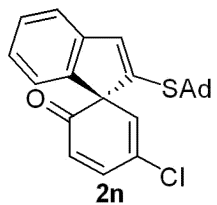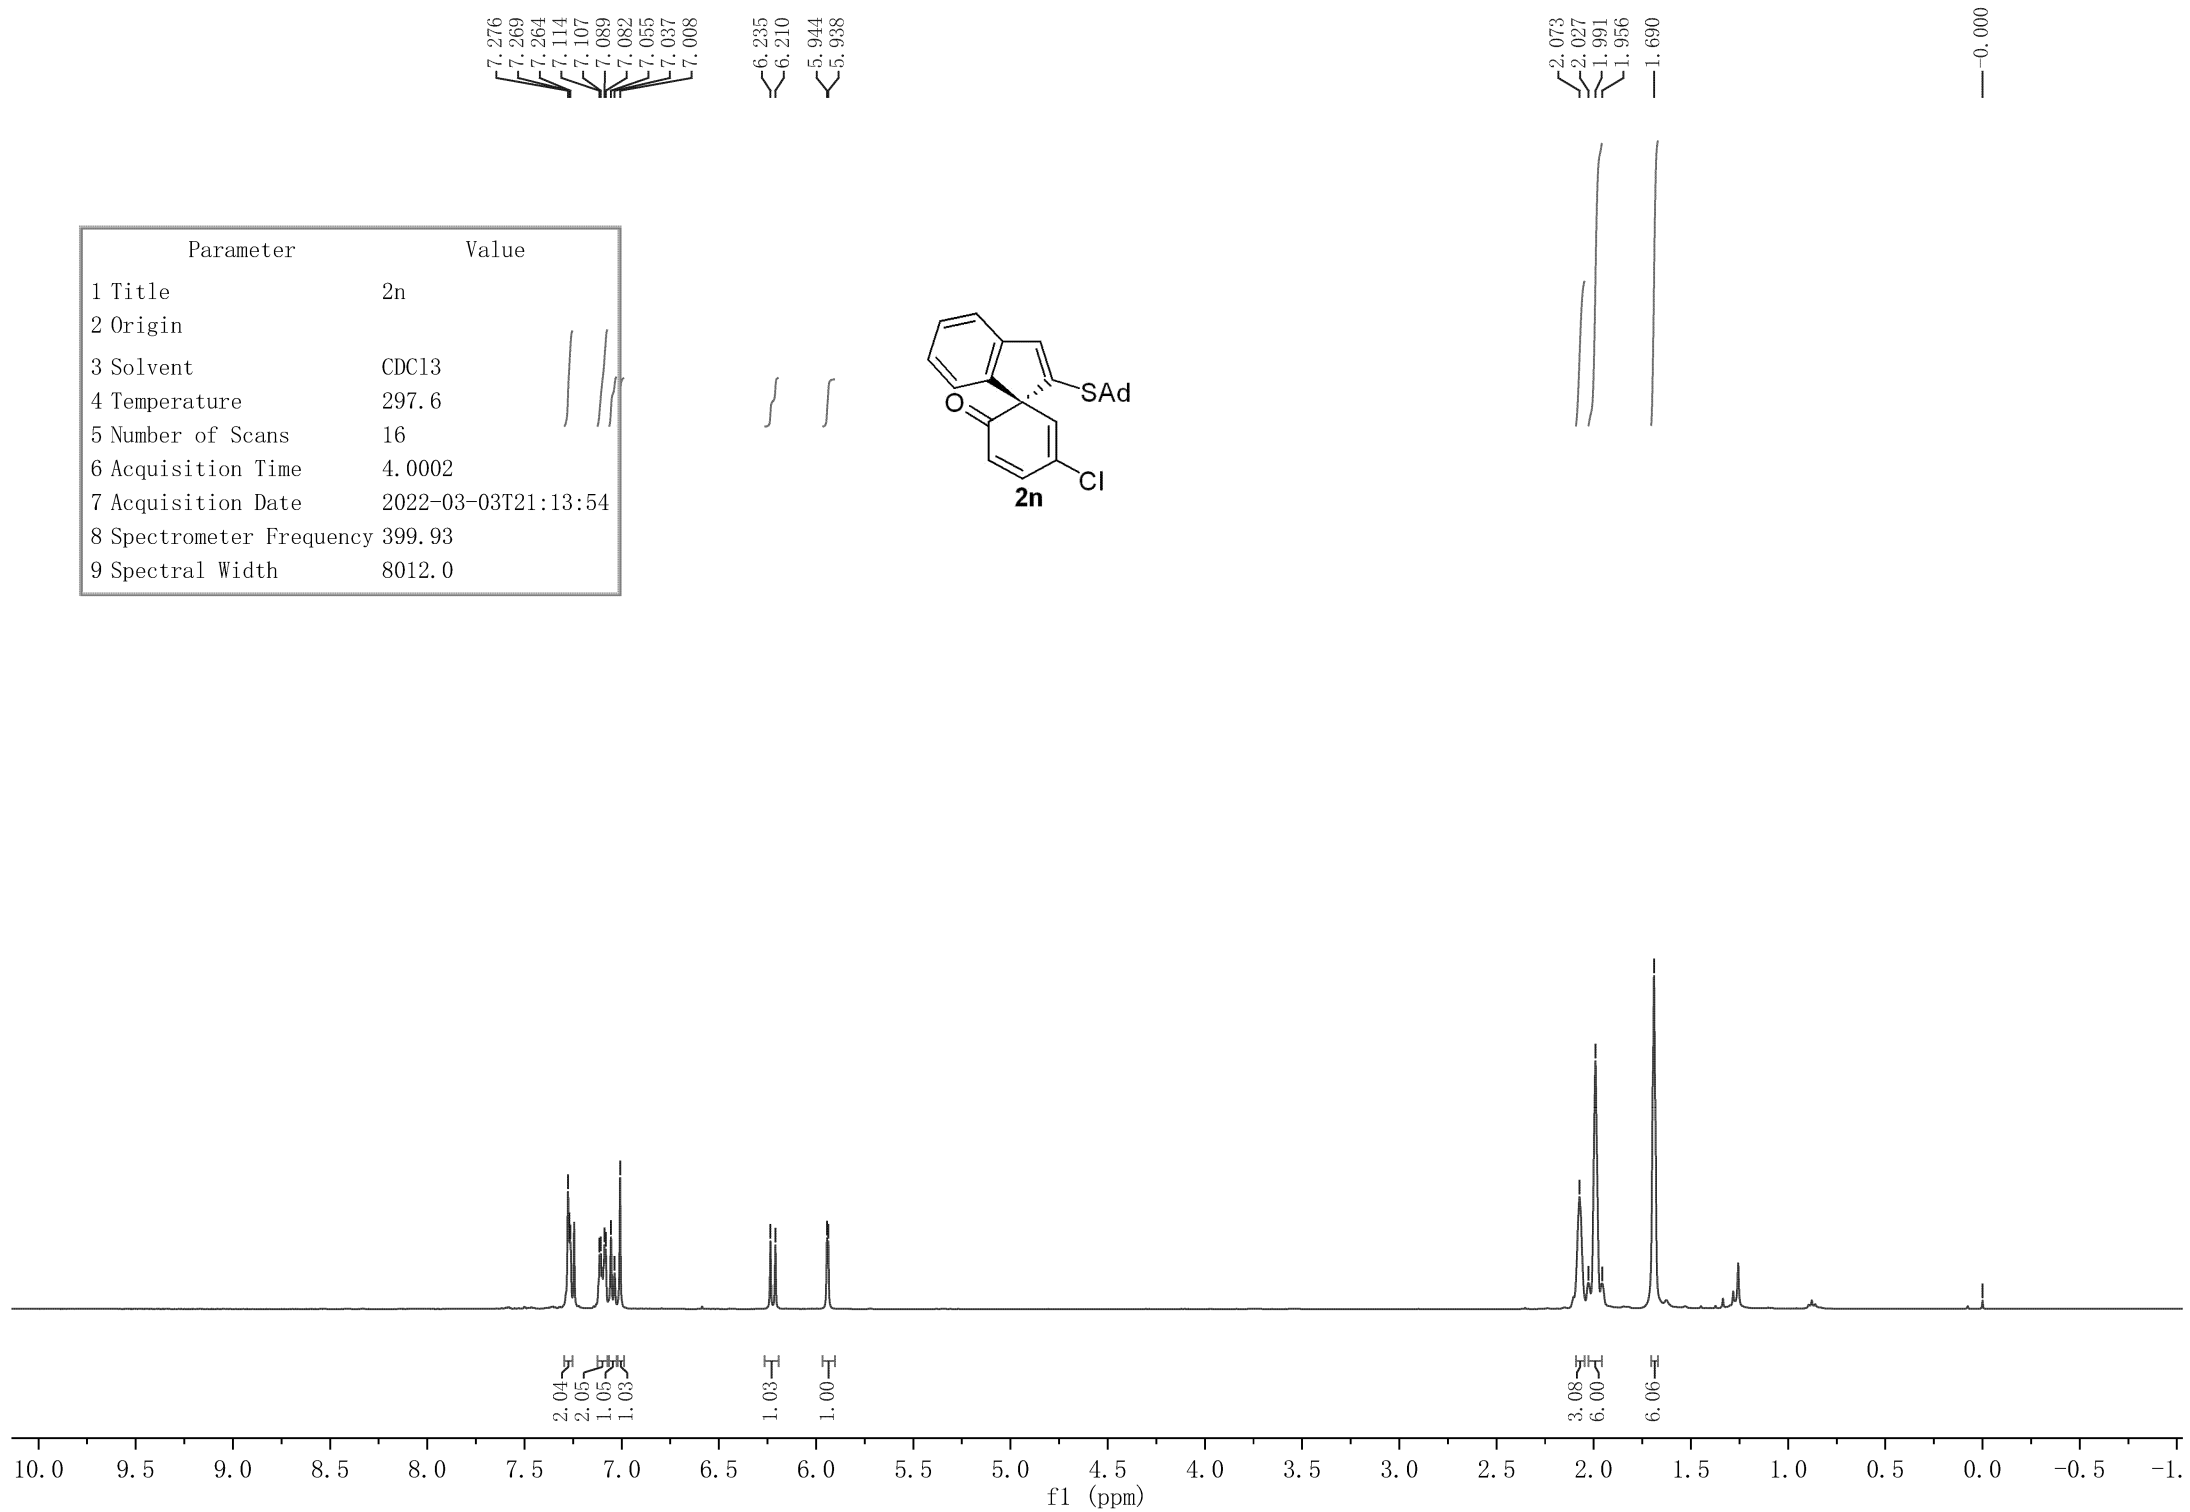

| Parameter                | Value               |
|--------------------------|---------------------|
| 1 Title                  | 2n                  |
| 2 Origin                 |                     |
| 3 Solvent                | CDC13               |
| 4 Temperature            | 297.6               |
| 5 Number of Scans        | 100                 |
| 6 Acquisition Time       | 1.0000              |
| 7 Acquisition Date       | 2022-03-03T21:19:39 |
| 8 Spectrometer Frequency | 100.56              |
| 9 Spectral Width         | 26041.0             |

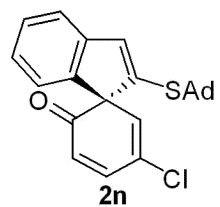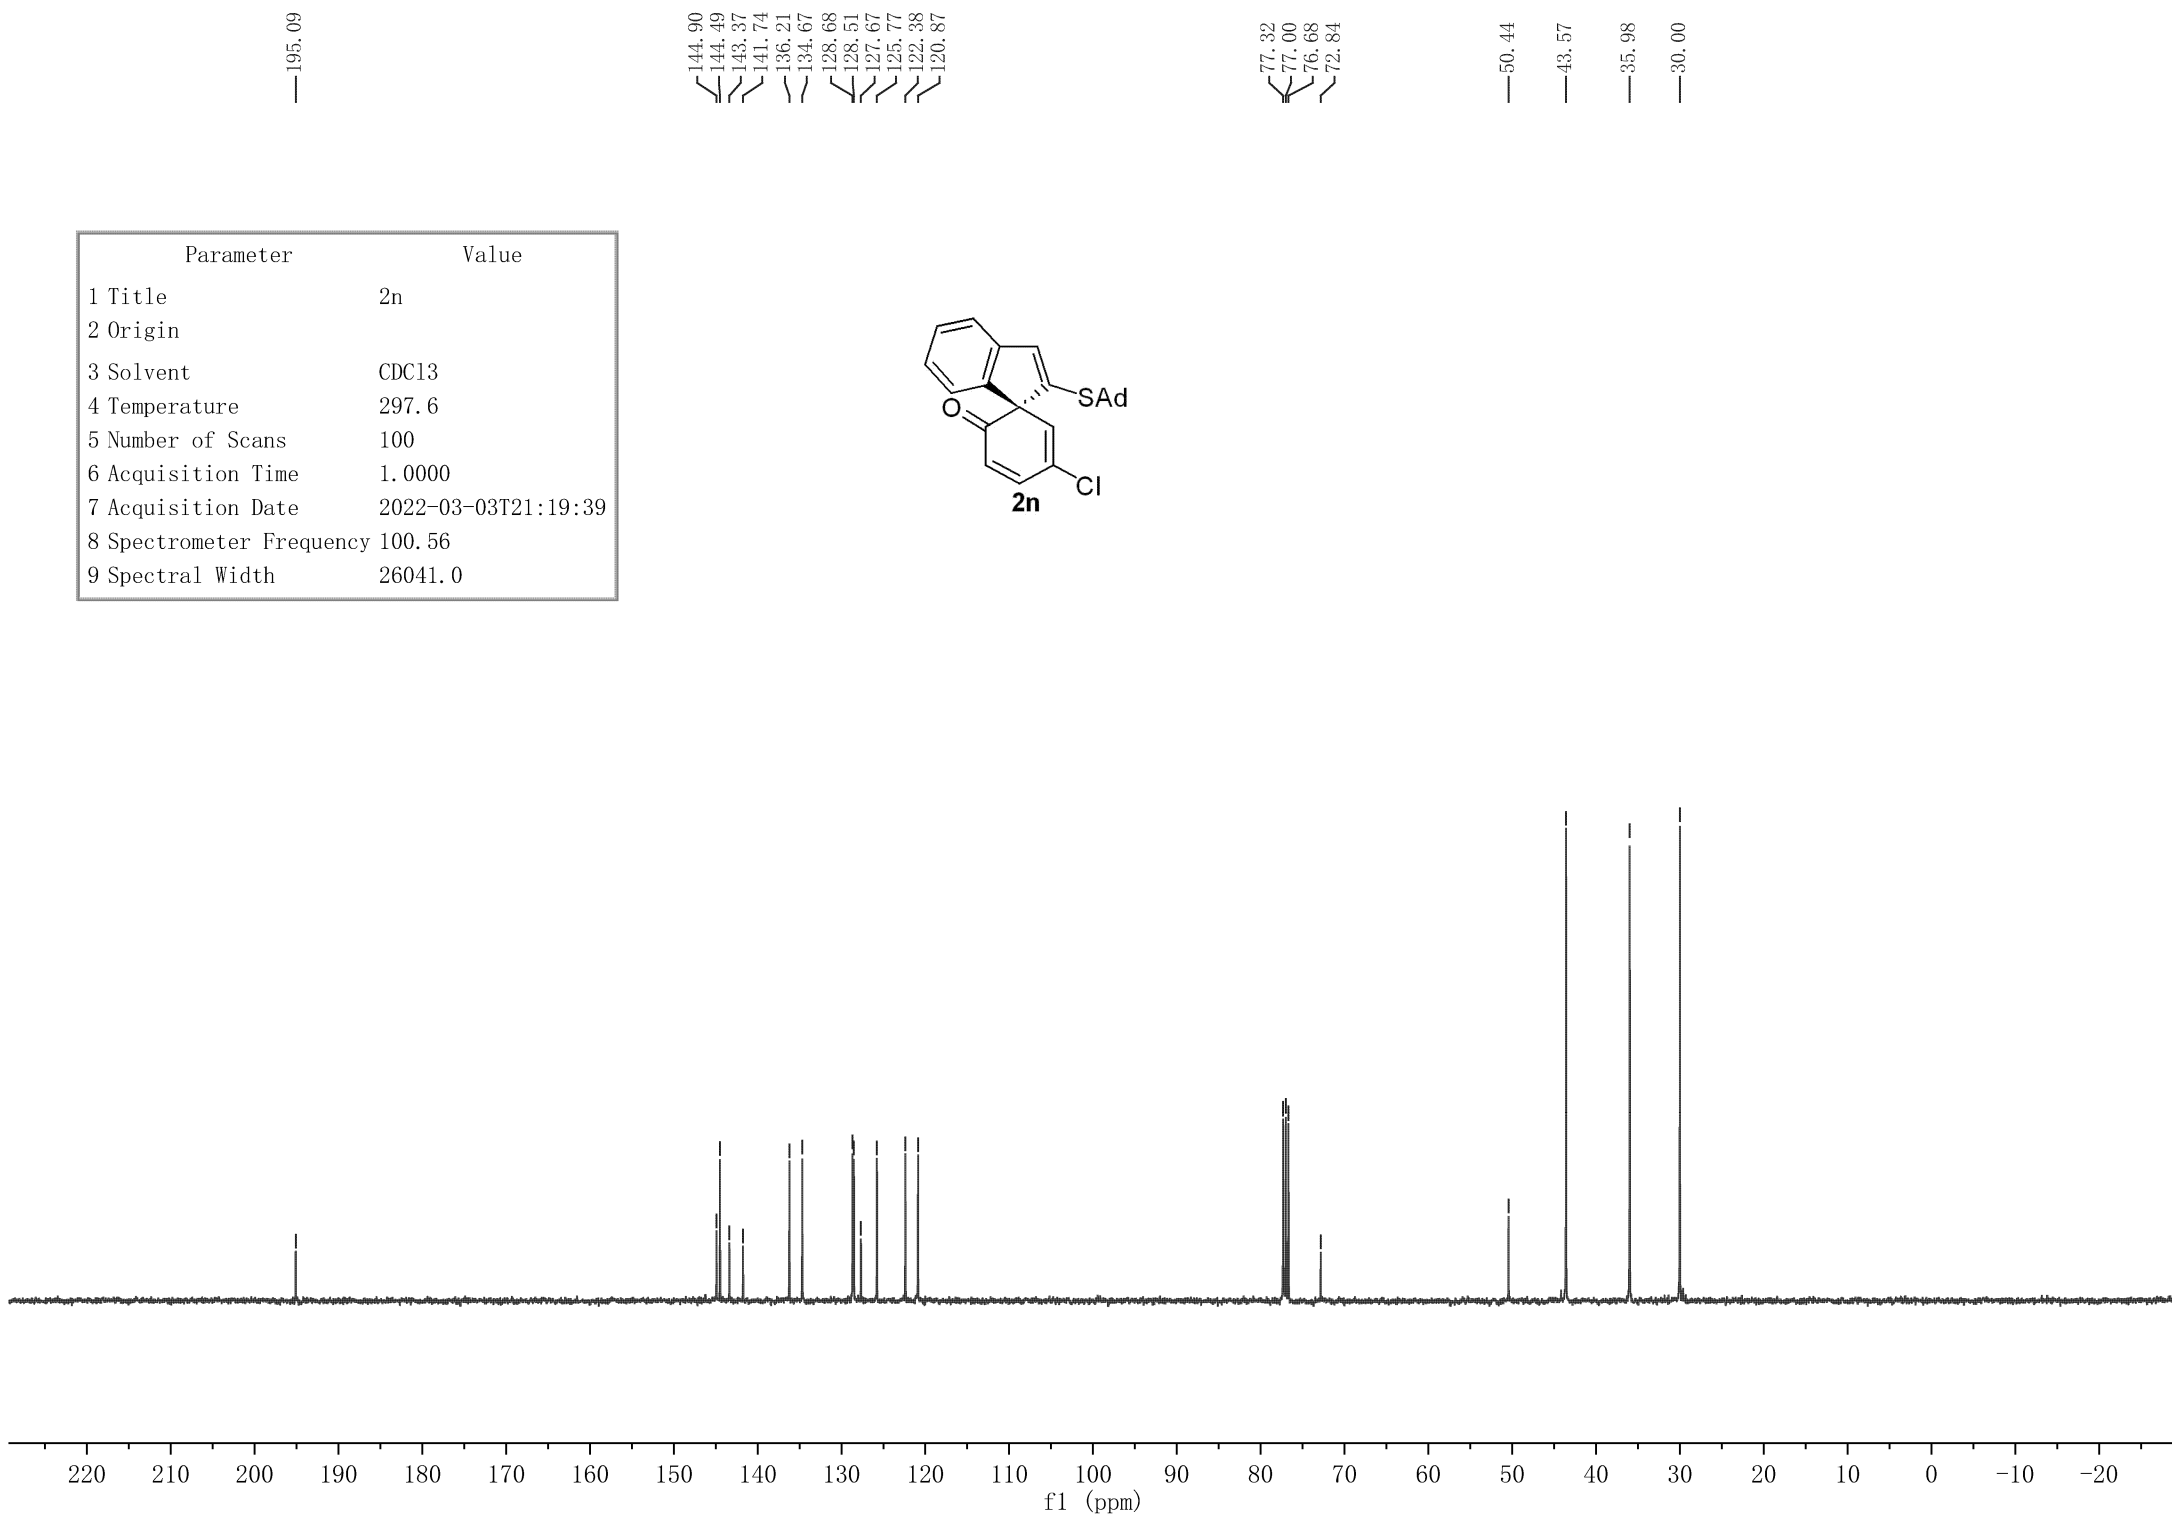



| Parameter                | Value               |
|--------------------------|---------------------|
| 1 Title                  | 2o                  |
| 2 Origin                 |                     |
| 3 Solvent                | CDC13               |
| 4 Temperature            | 297.2               |
| 5 Number of Scans        | 16                  |
| 6 Acquisition Time       | 4.0002              |
| 7 Acquisition Date       | 2022-03-03T21:00:24 |
| 8 Spectrometer Frequency | 399.93              |
| 9 Spectral Width         | 8012.0              |

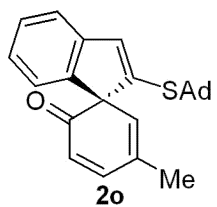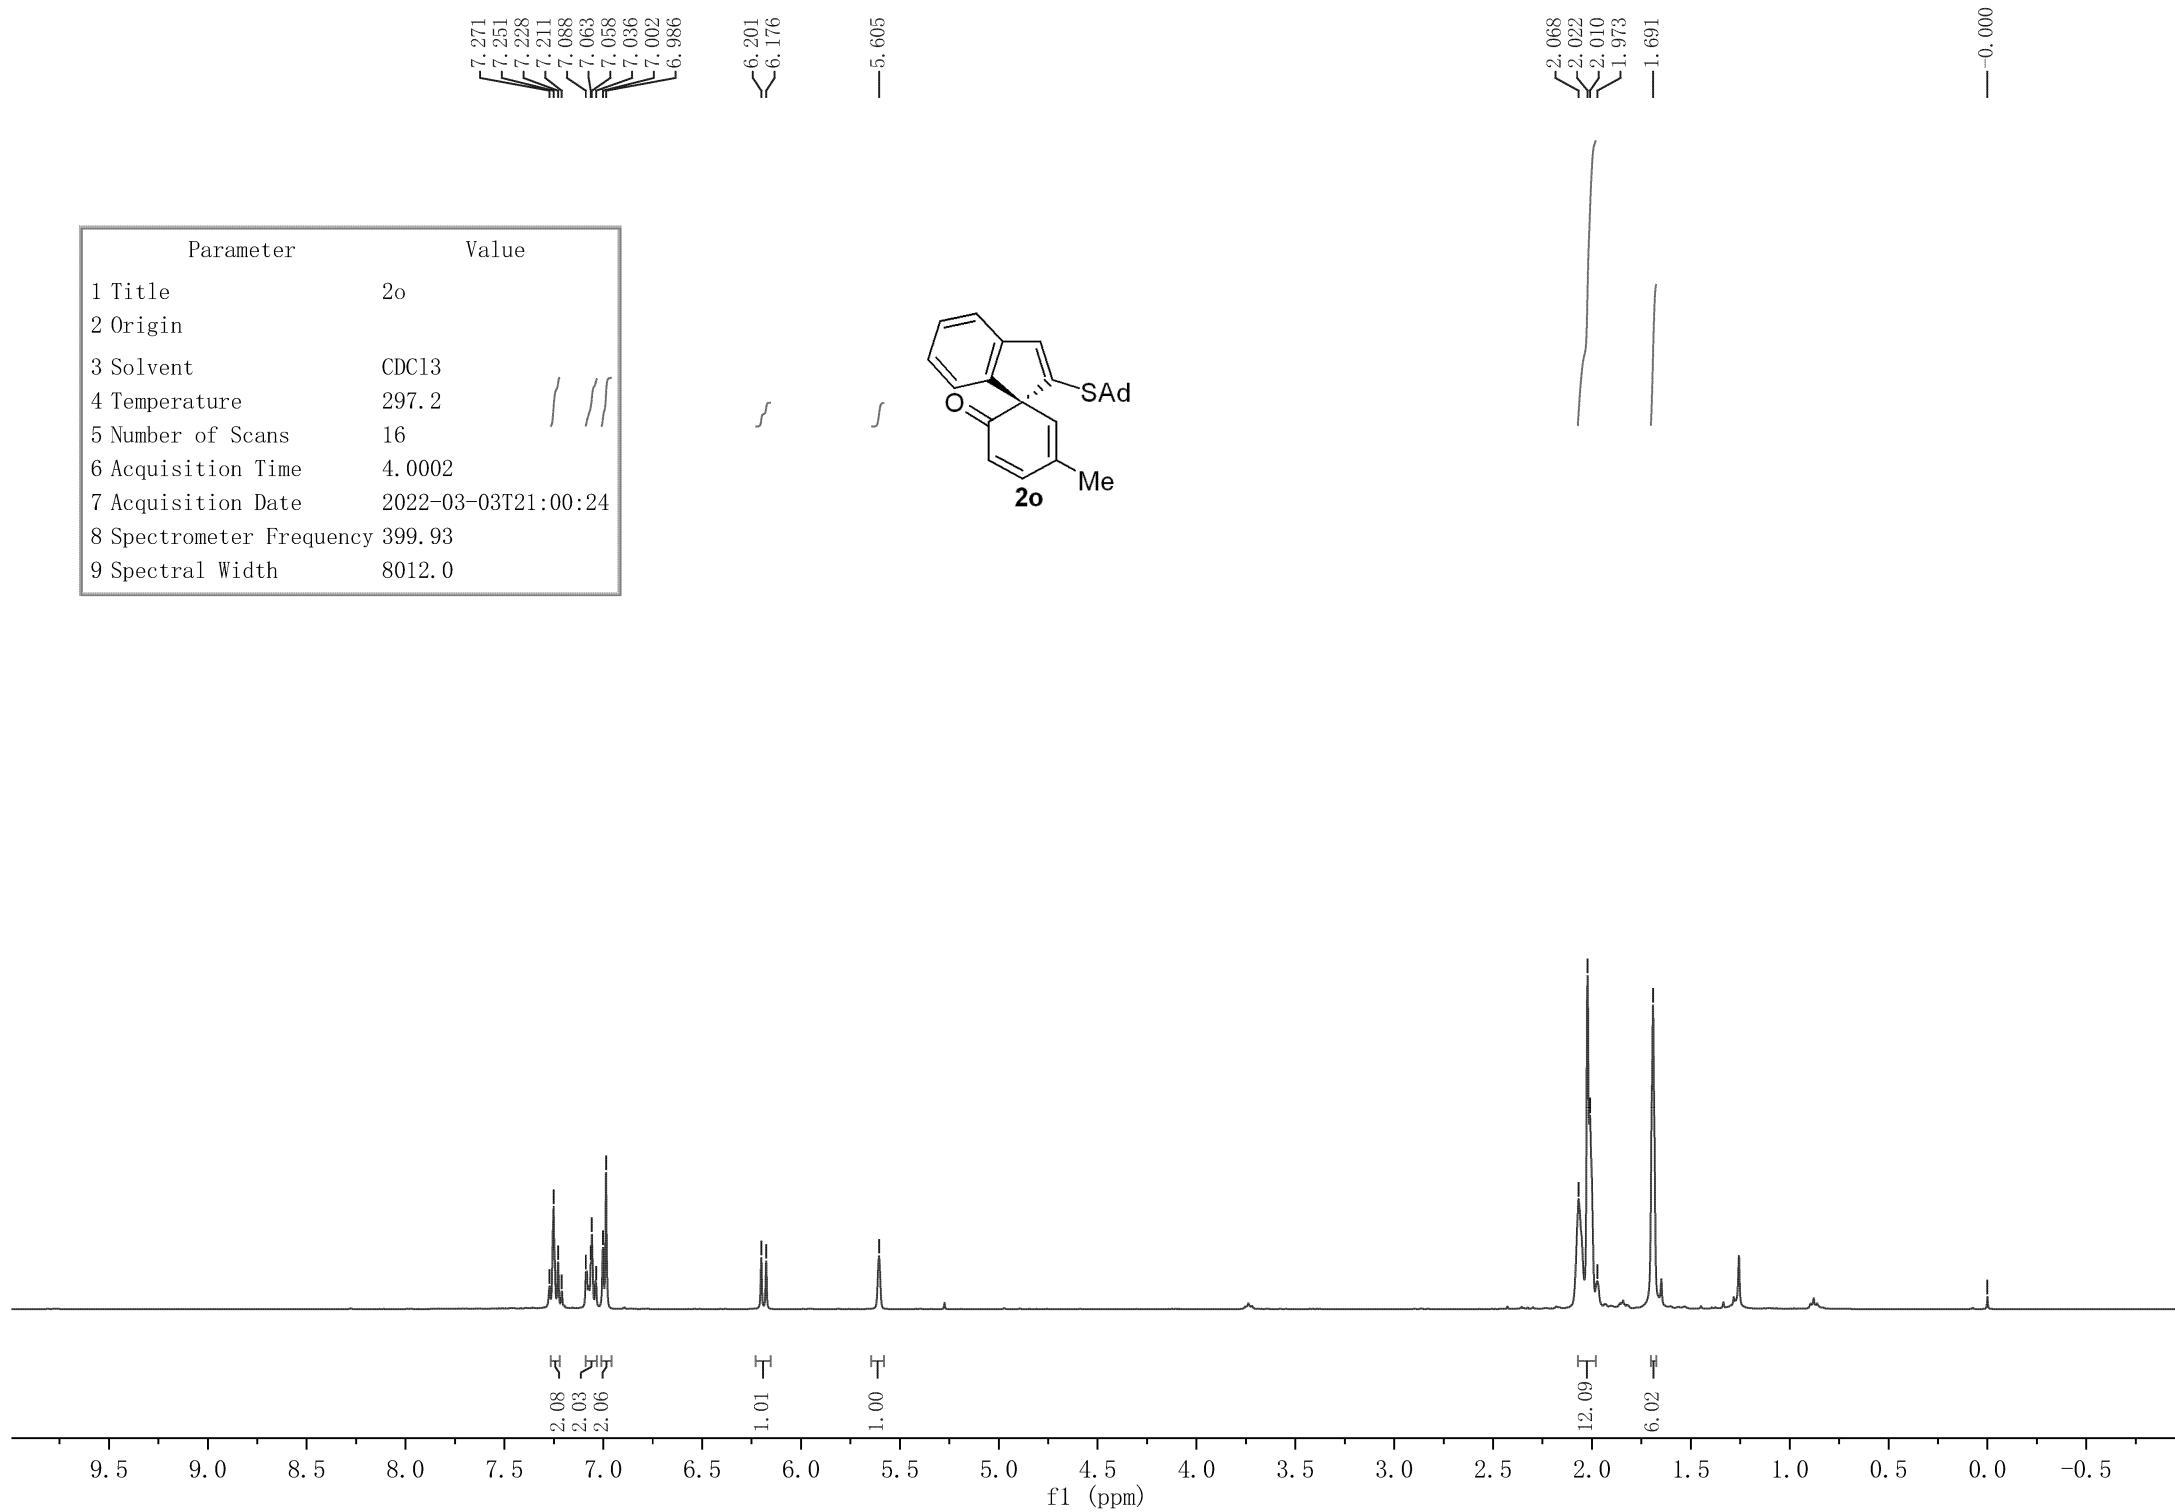

—197.23

| Parameter                | Value               |
|--------------------------|---------------------|
| 1 Title                  | 2o                  |
| 2 Origin                 |                     |
| 3 Solvent                | CDC13               |
| 4 Temperature            | 297.4               |
| 5 Number of Scans        | 200                 |
| 6 Acquisition Time       | 1.0000              |
| 7 Acquisition Date       | 2022-03-03T21:09:19 |
| 8 Spectrometer Frequency | 100.56              |
| 9 Spectral Width         | 26041.0             |

147.11  
145.10  
144.40  
142.77  
134.93  
134.12  
130.74  
127.98  
127.07  
125.29  
122.11  
120.56

77.32  
77.00  
76.68  
72.14

—50.02

—43.54

—36.05

—30.00

—21.22

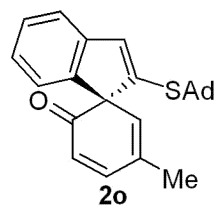

147.11  
145.10  
144.40  
142.77

134.93  
134.12

—130.74

127.98  
127.07  
125.29

—122.11  
—120.56

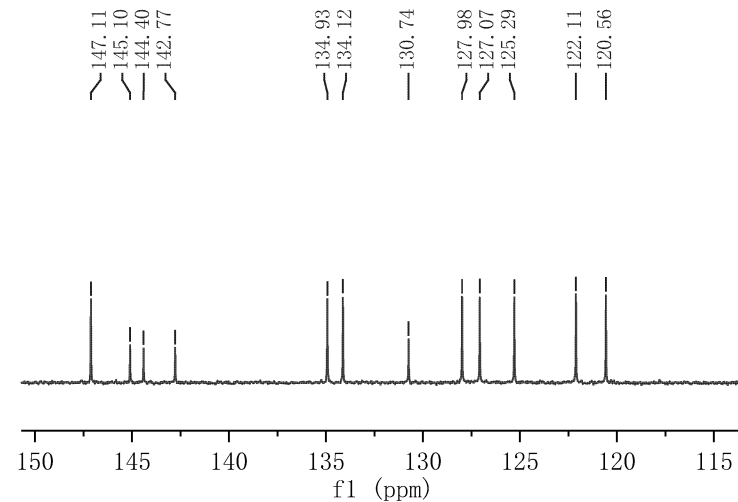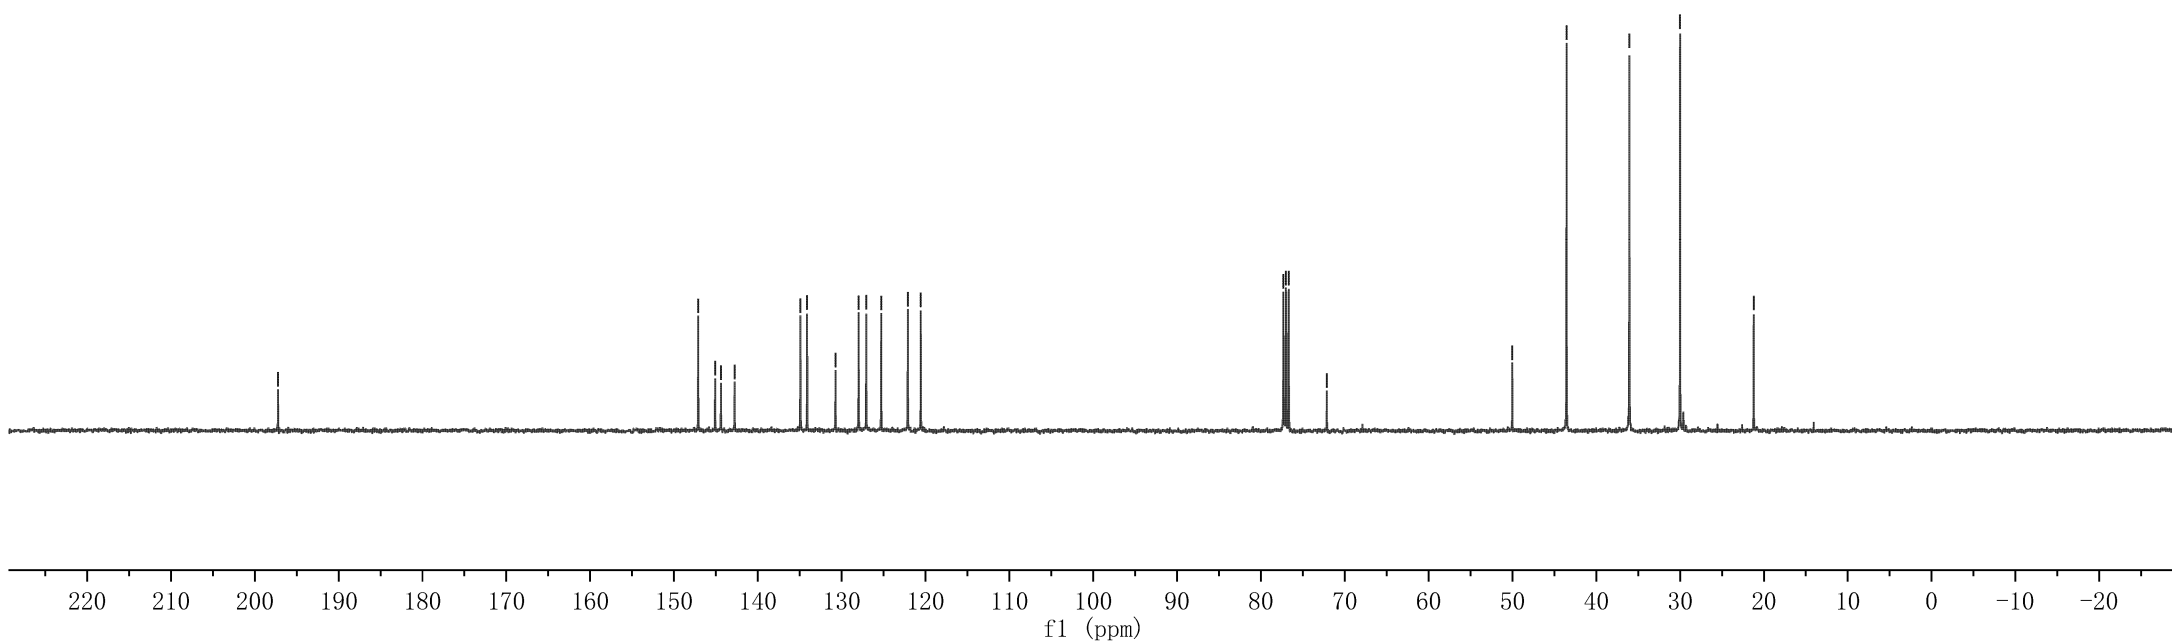

| Parameter                | Value               |
|--------------------------|---------------------|
| 1 Title                  | FXY-8-138-1         |
| 2 Origin                 | Bruker BioSpin GmbH |
| 3 Solvent                | CDC13               |
| 4 Temperature            | 298.0               |
| 5 Number of Scans        | 5                   |
| 6 Acquisition Time       | 4.0894              |
| 7 Acquisition Date       | 2022-06-03T15:42:14 |
| 8 Spectrometer Frequency | 400.13              |
| 9 Spectral Width         | 8012.8              |

7.280  
7.262  
7.234  
7.217  
7.131  
7.125  
7.106  
7.101  
7.081  
7.062  
7.044  
7.041  
6.999  
6.990  
6.971  
6.217  
6.193

5.583

2.354  
2.335  
2.316  
2.300  
2.066  
2.006  
1.971  
1.692

1.154  
1.135  
1.117

0.000

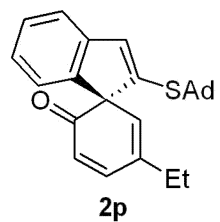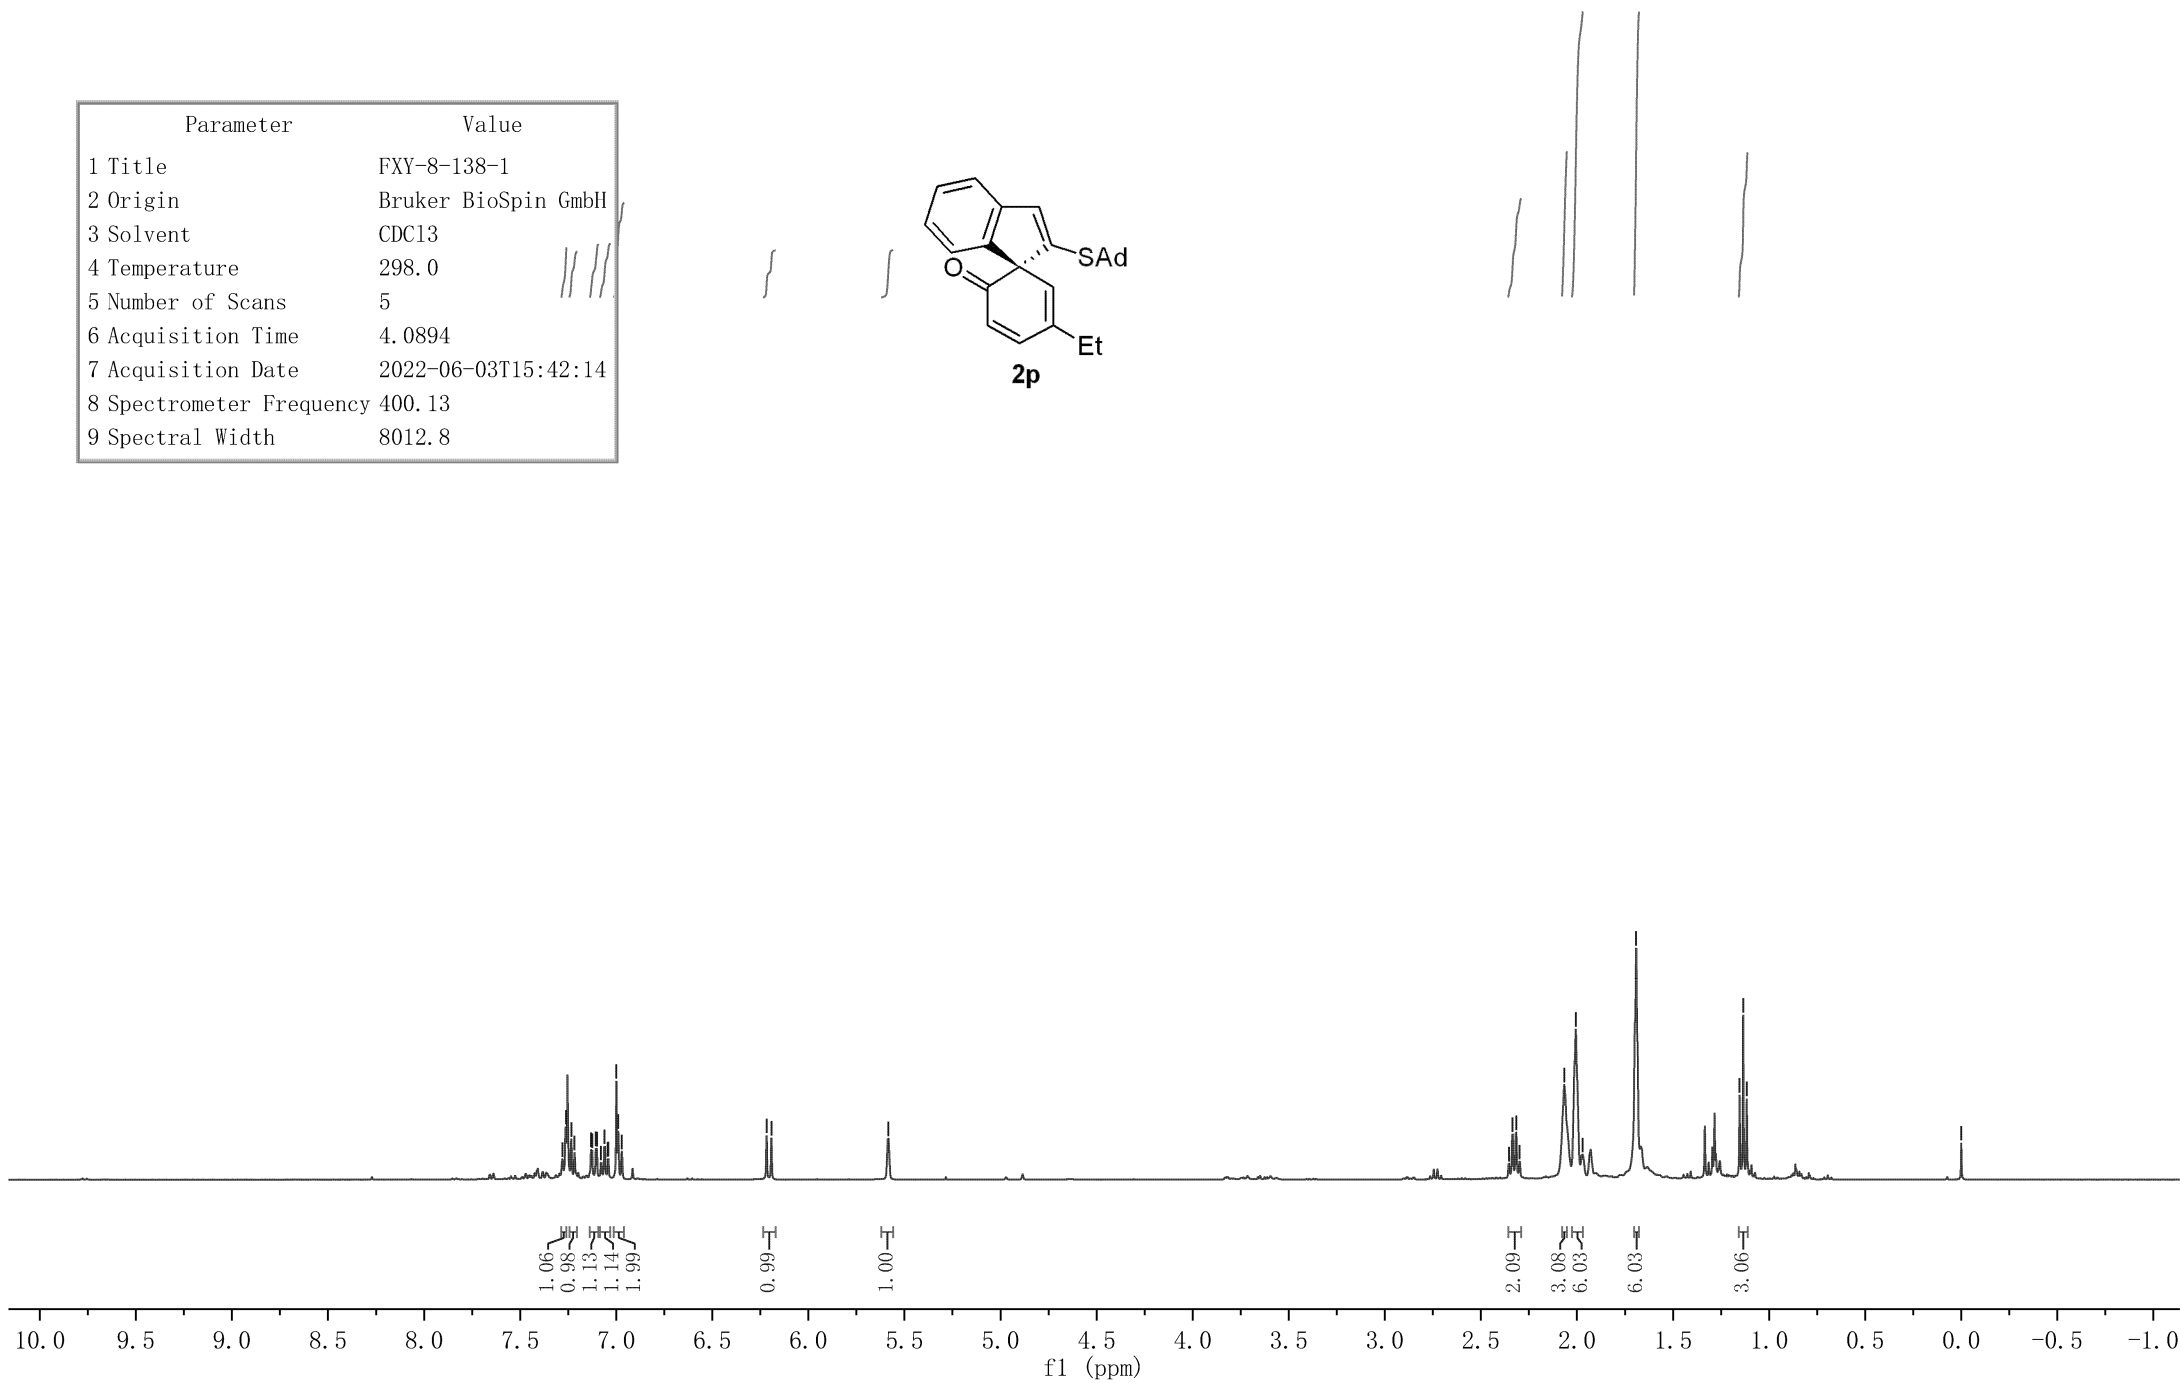

| Parameter                | Value               |
|--------------------------|---------------------|
| 1 Title                  | FXY-8-138-1-c       |
| 2 Origin                 | Bruker BioSpin GmbH |
| 3 Solvent                | CDC13               |
| 4 Temperature            | 300.0               |
| 5 Number of Scans        | 27                  |
| 6 Acquisition Time       | 1.3631              |
| 7 Acquisition Date       | 2022-06-03T15:43:15 |
| 8 Spectrometer Frequency | 100.61              |
| 9 Spectral Width         | 24038.5             |

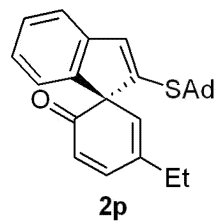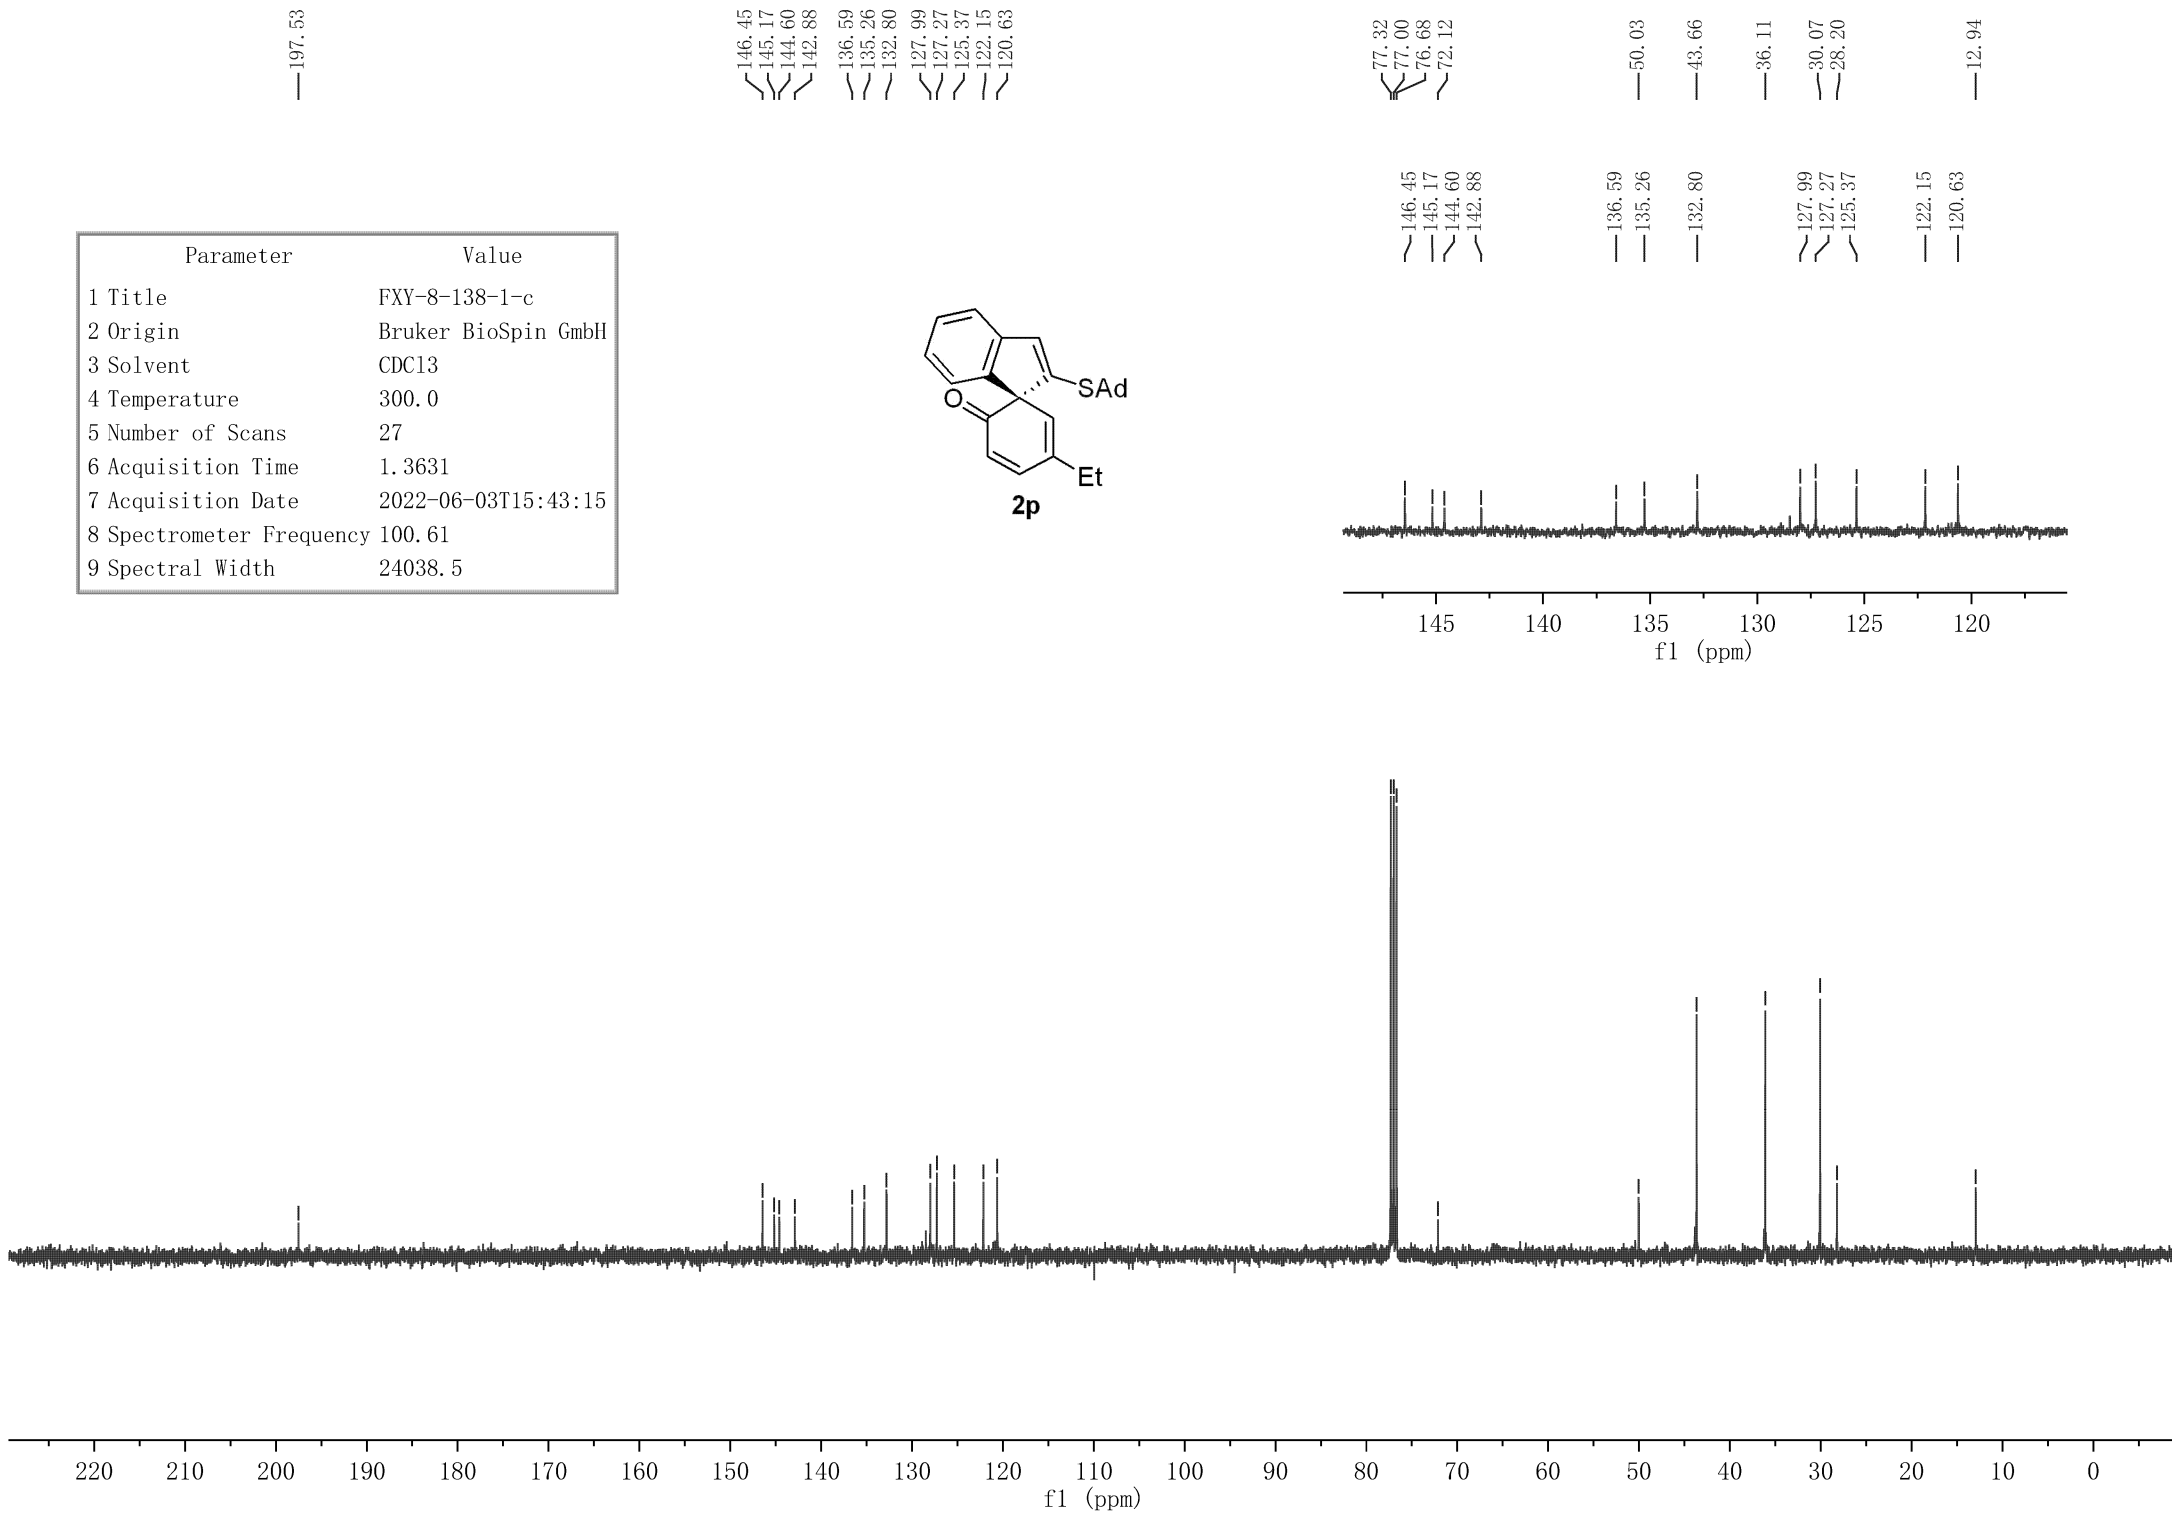

| Parameter                | Value               |
|--------------------------|---------------------|
| 1 Title                  | FXY-2t-rac          |
| 2 Origin                 |                     |
| 3 Solvent                | CDC13               |
| 4 Temperature            | 300.5               |
| 5 Number of Scans        | 16                  |
| 6 Acquisition Time       | 4.0002              |
| 7 Acquisition Date       | 2023-08-08T23:08:19 |
| 8 Spectrometer Frequency | 399.90              |
| 9 Spectral Width         | 8012.0              |

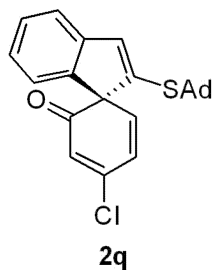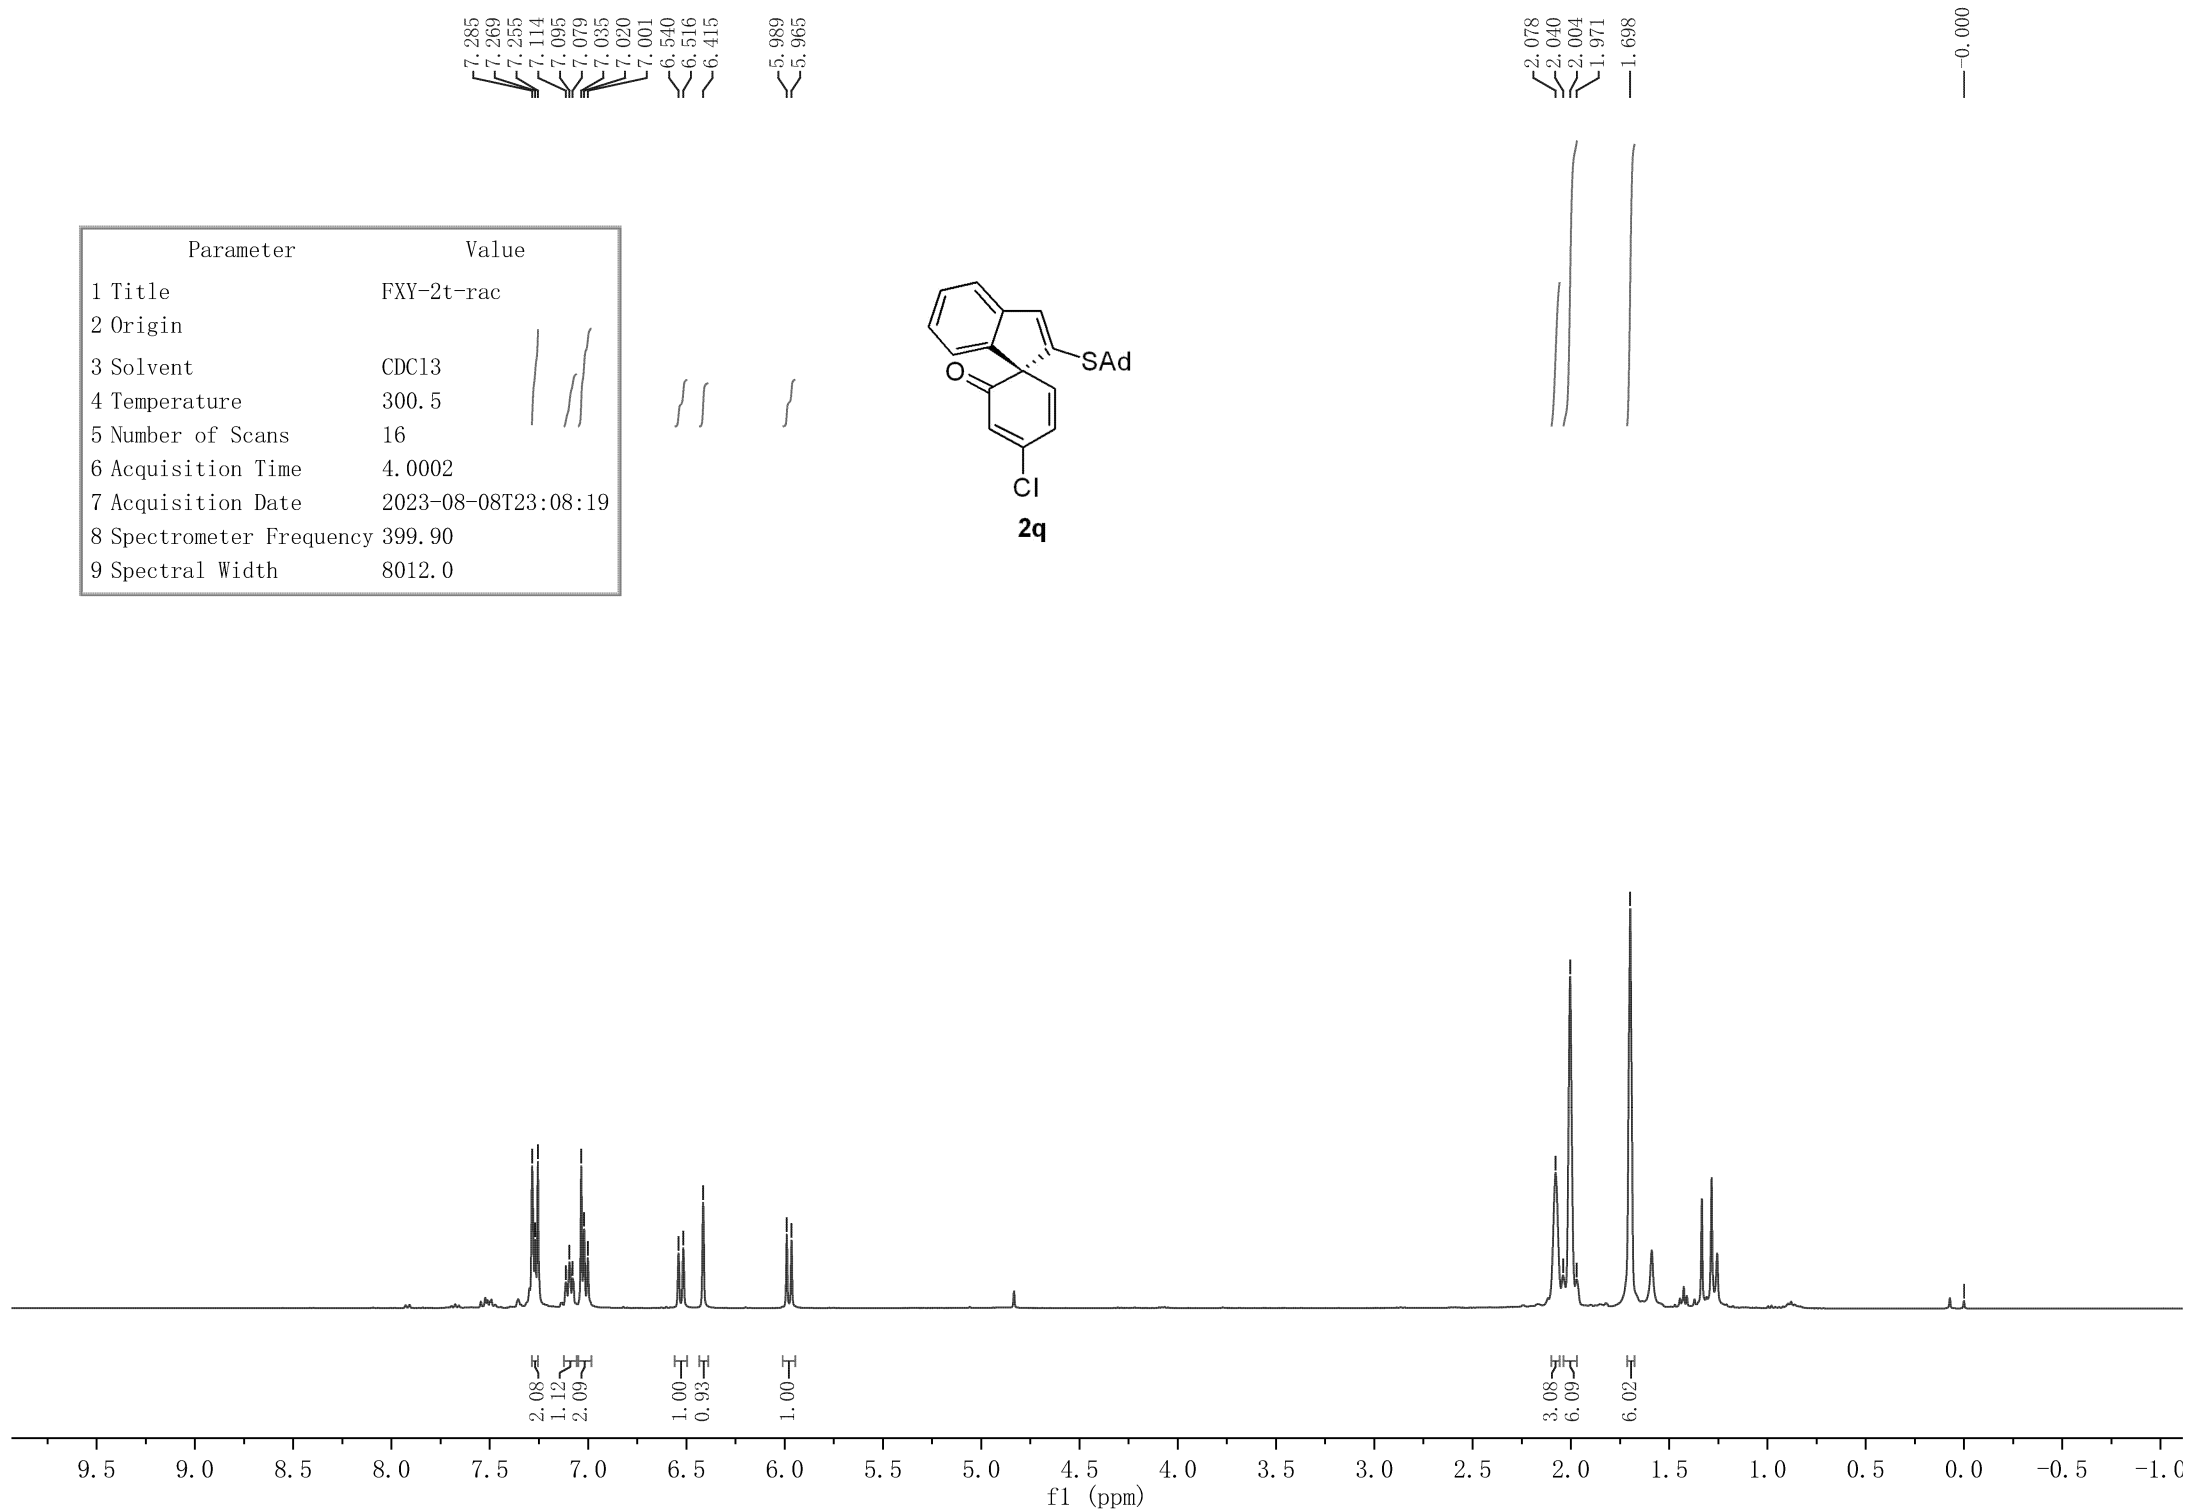

| Parameter                | Value               |
|--------------------------|---------------------|
| 1 Title                  | FXY-2t-rac          |
| 2 Origin                 |                     |
| 3 Solvent                | CDC13               |
| 4 Temperature            | 300.5               |
| 5 Number of Scans        | 16                  |
| 6 Acquisition Time       | 4.0002              |
| 7 Acquisition Date       | 2023-08-08T23:08:19 |
| 8 Spectrometer Frequency | 399.90              |
| 9 Spectral Width         | 8012.0              |

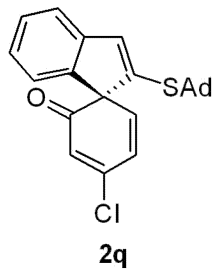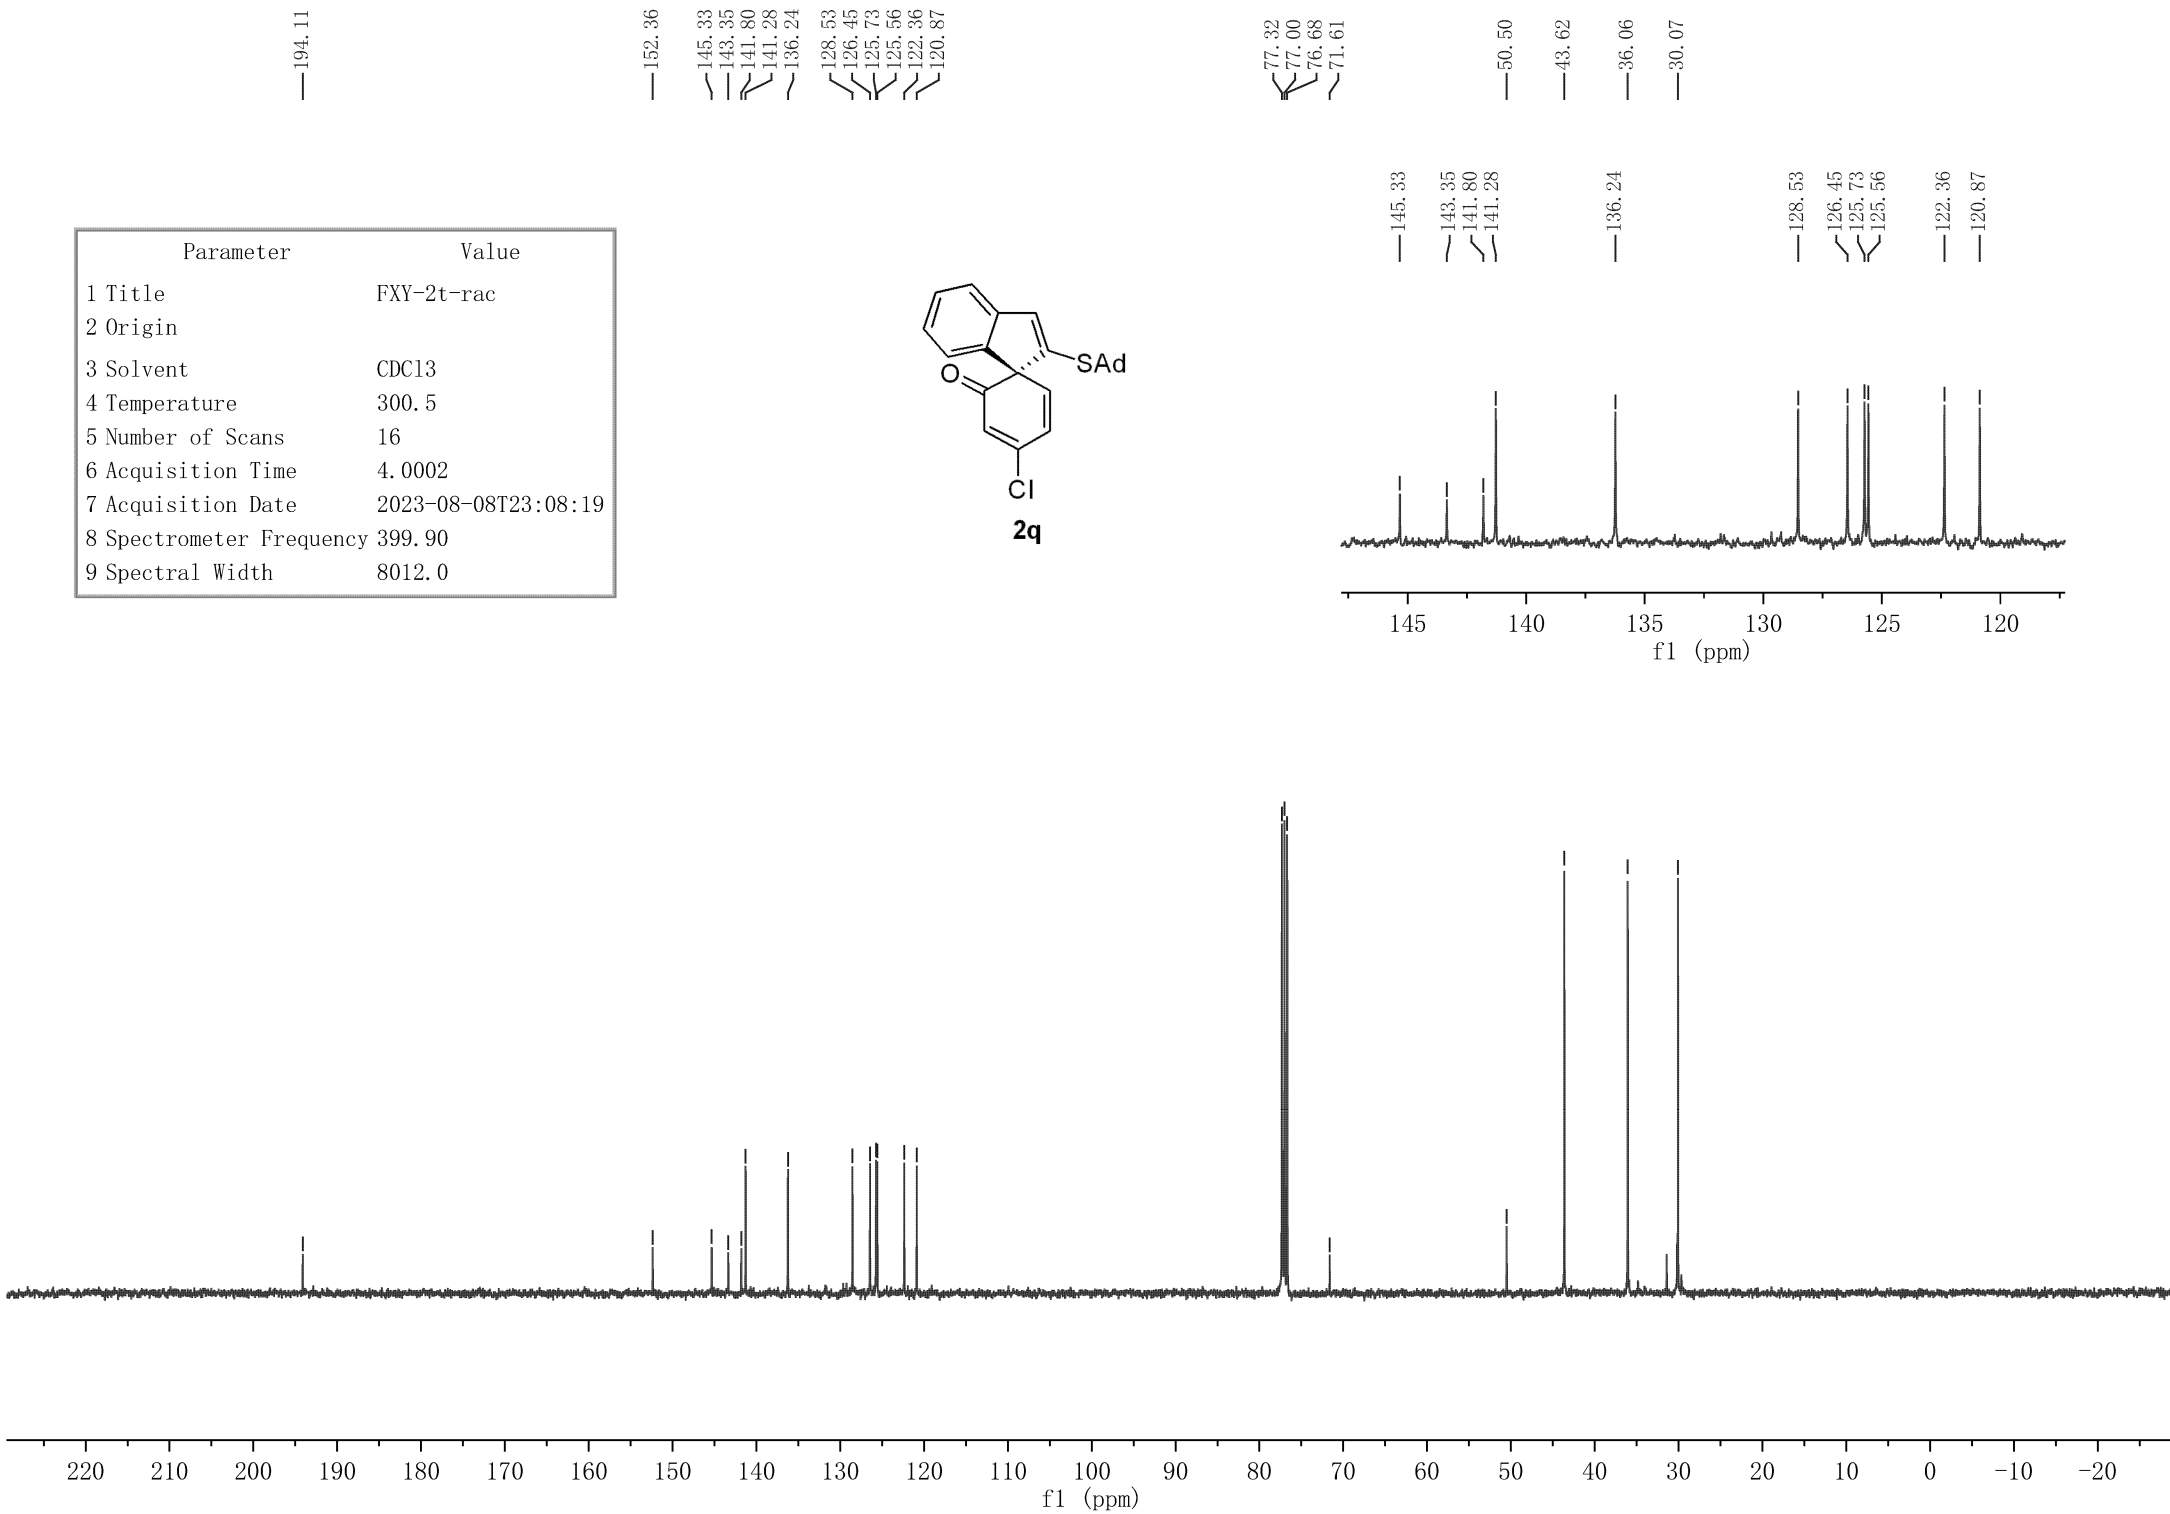

| Parameter                | Value               |
|--------------------------|---------------------|
| 1 Title                  | FXY-2r              |
| 2 Origin                 |                     |
| 3 Solvent                | CDC13               |
| 4 Temperature            | 300.1               |
| 5 Number of Scans        | 300                 |
| 6 Acquisition Time       | 1.0000              |
| 7 Acquisition Date       | 2023-08-09T22:23:38 |
| 8 Spectrometer Frequency | 100.56              |
| 9 Spectral Width         | 26041.0             |

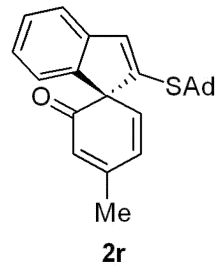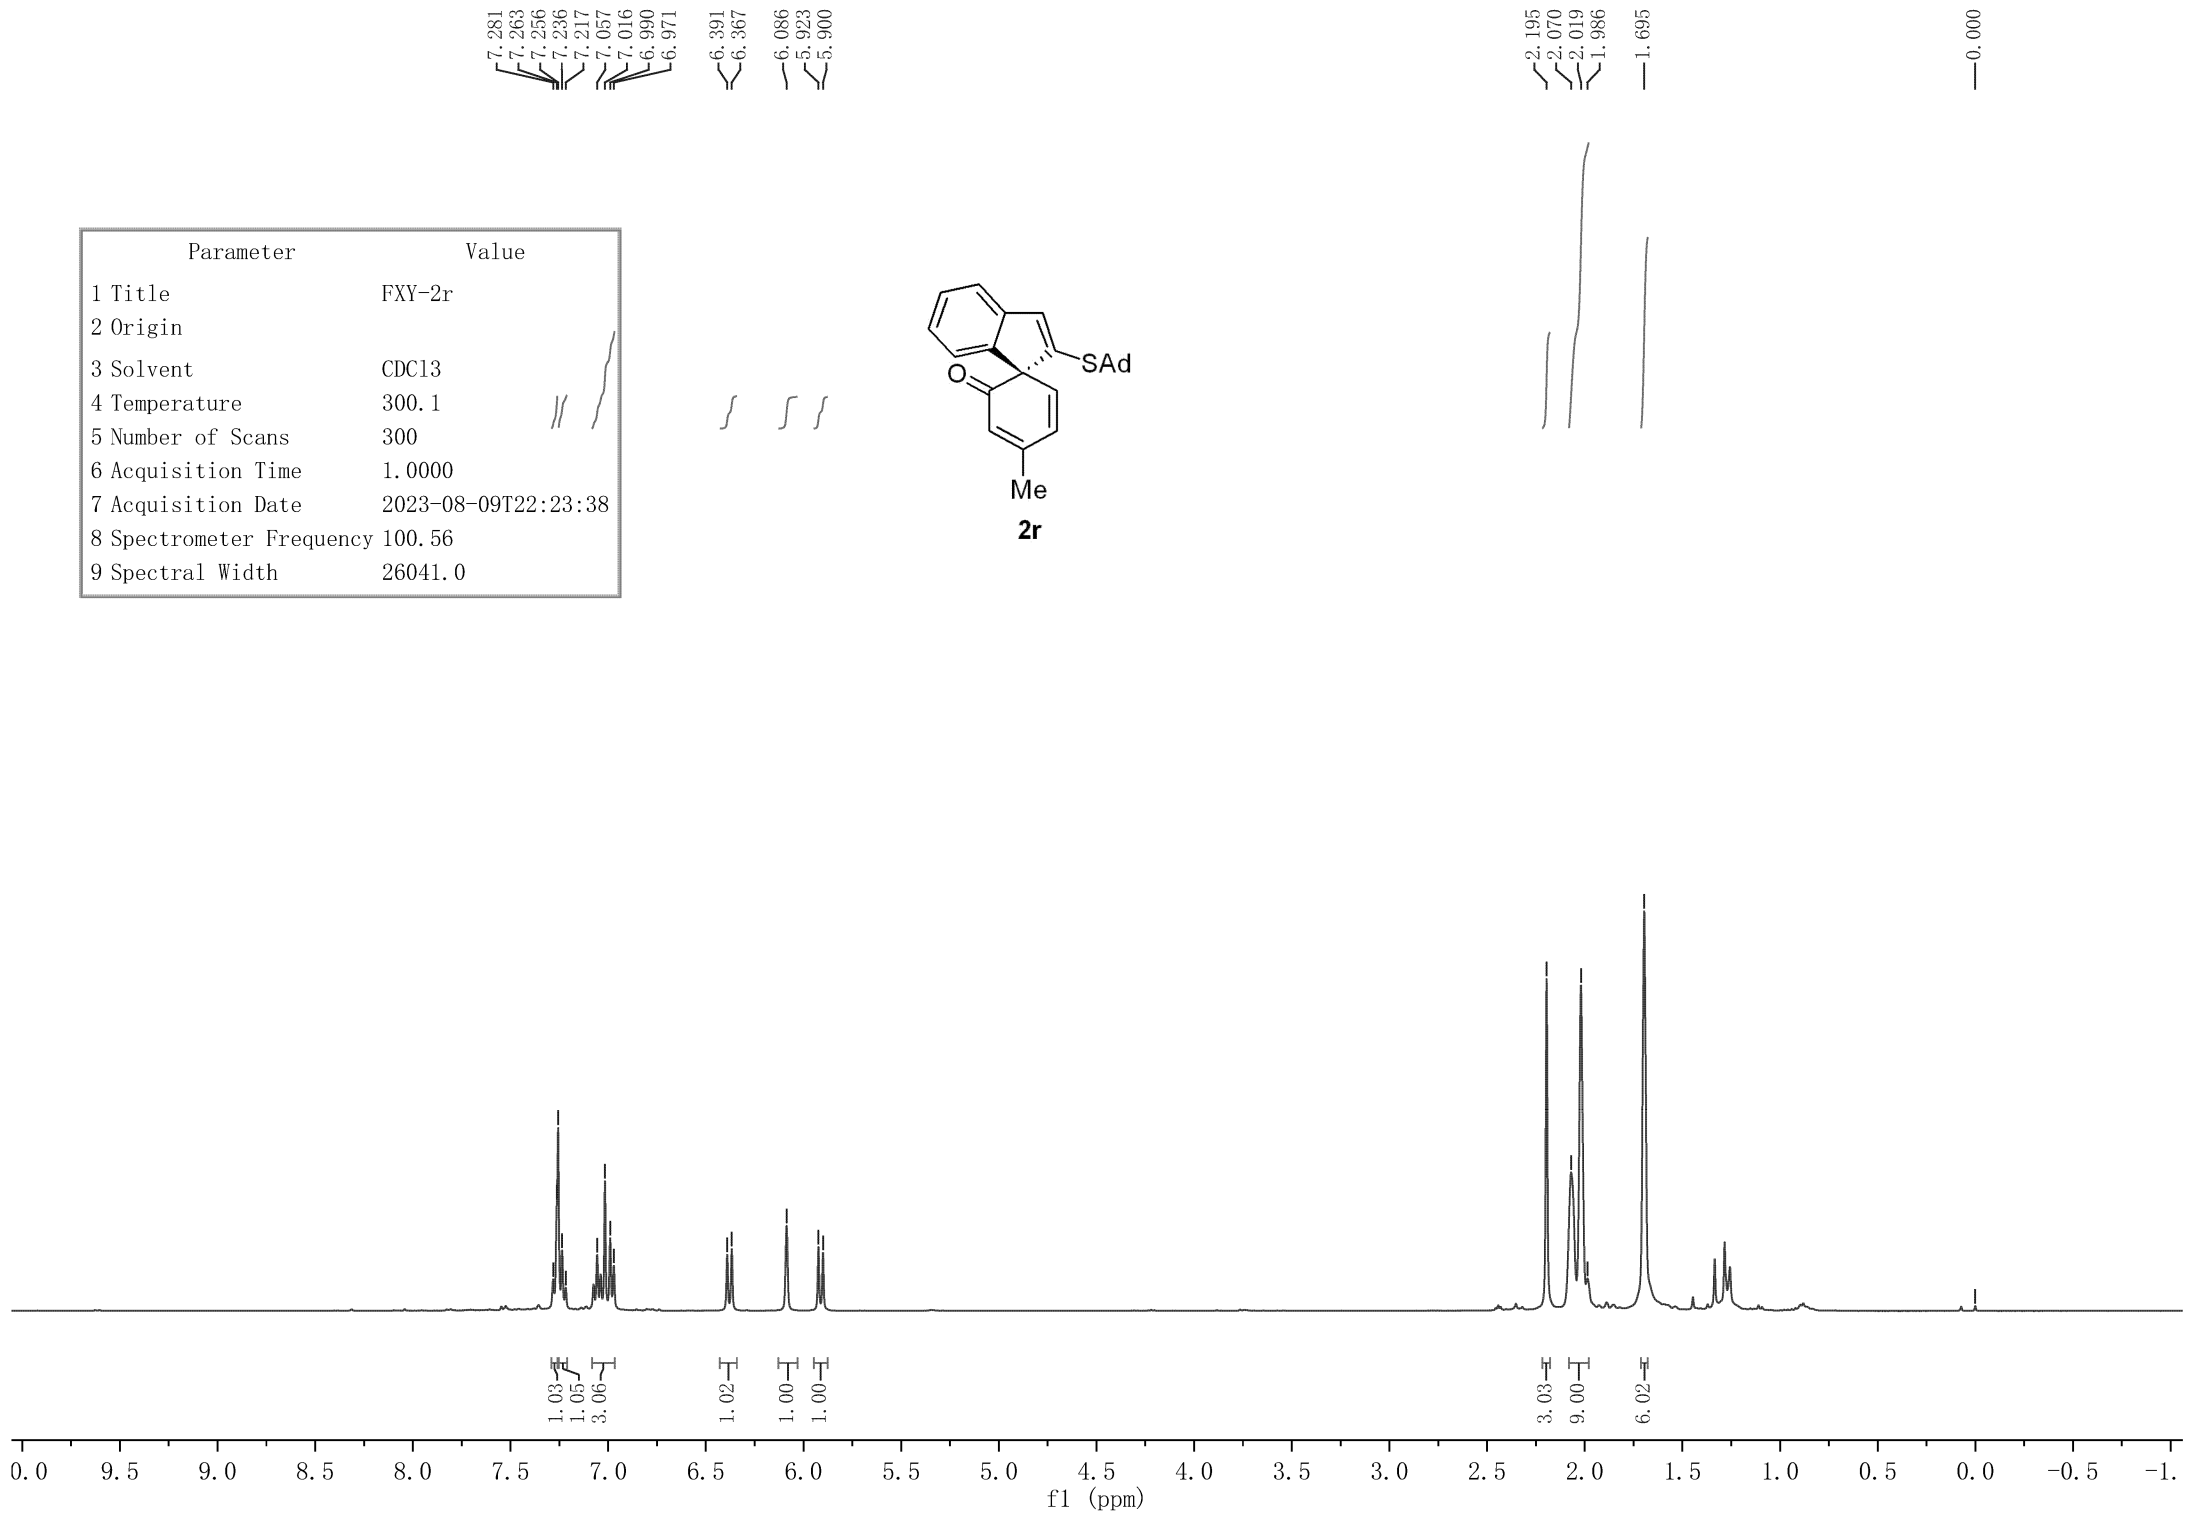

| Parameter                | Value               |
|--------------------------|---------------------|
| 1 Title                  | FXY-2r              |
| 2 Origin                 |                     |
| 3 Solvent                | CDC13               |
| 4 Temperature            | 300.1               |
| 5 Number of Scans        | 300                 |
| 6 Acquisition Time       | 1.0000              |
| 7 Acquisition Date       | 2023-08-09T22:23:38 |
| 8 Spectrometer Frequency | 100.56              |
| 9 Spectral Width         | 26041.0             |

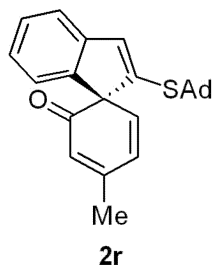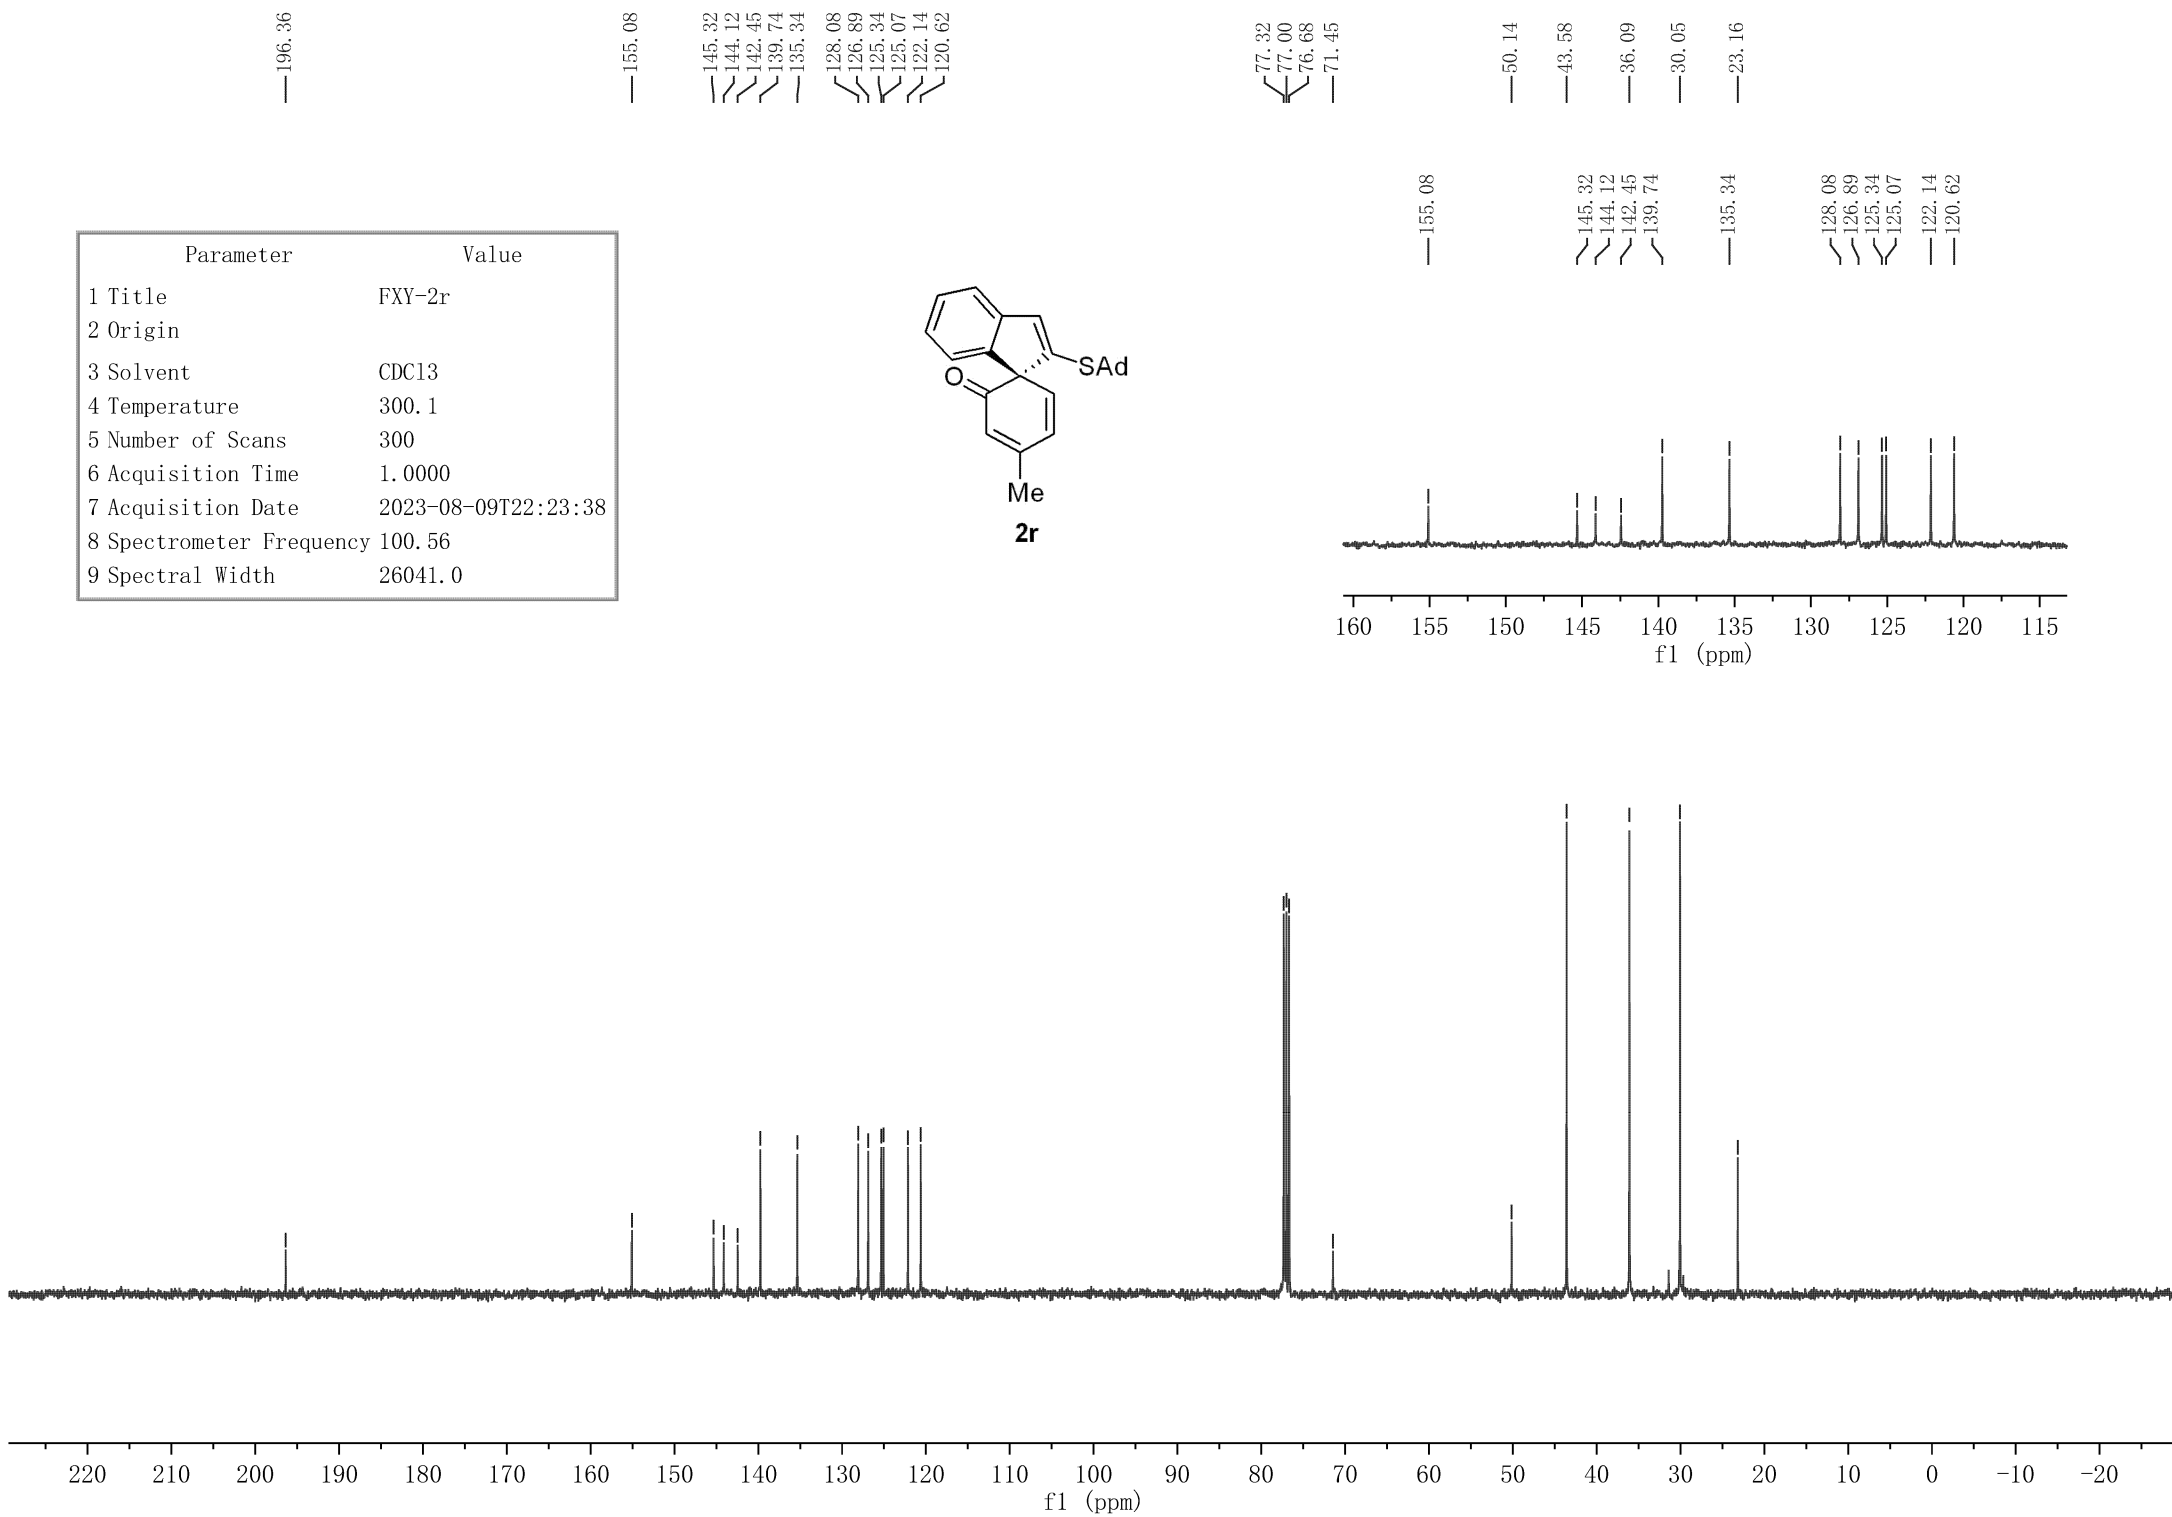



| Parameter                | Value               |
|--------------------------|---------------------|
| 1 Title                  | 2s                  |
| 2 Origin                 |                     |
| 3 Solvent                | CDC13               |
| 4 Temperature            | 298.2               |
| 5 Number of Scans        | 16                  |
| 6 Acquisition Time       | 4.0002              |
| 7 Acquisition Date       | 2022-05-17T13:24:58 |
| 8 Spectrometer Frequency | 399.92              |
| 9 Spectral Width         | 8012.0              |

7.291  
7.273  
7.243  
7.226  
7.224  
7.089  
7.070  
7.067  
7.049  
7.035  
7.017  
6.998  
6.392  
6.387  
6.367  
6.363  
5.964  
5.939  
5.664  
5.660

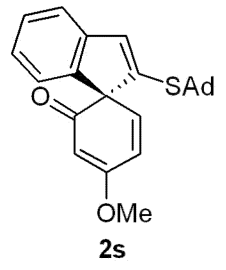

3.843  
2.067  
2.029  
1.996  
1.697  
0.000

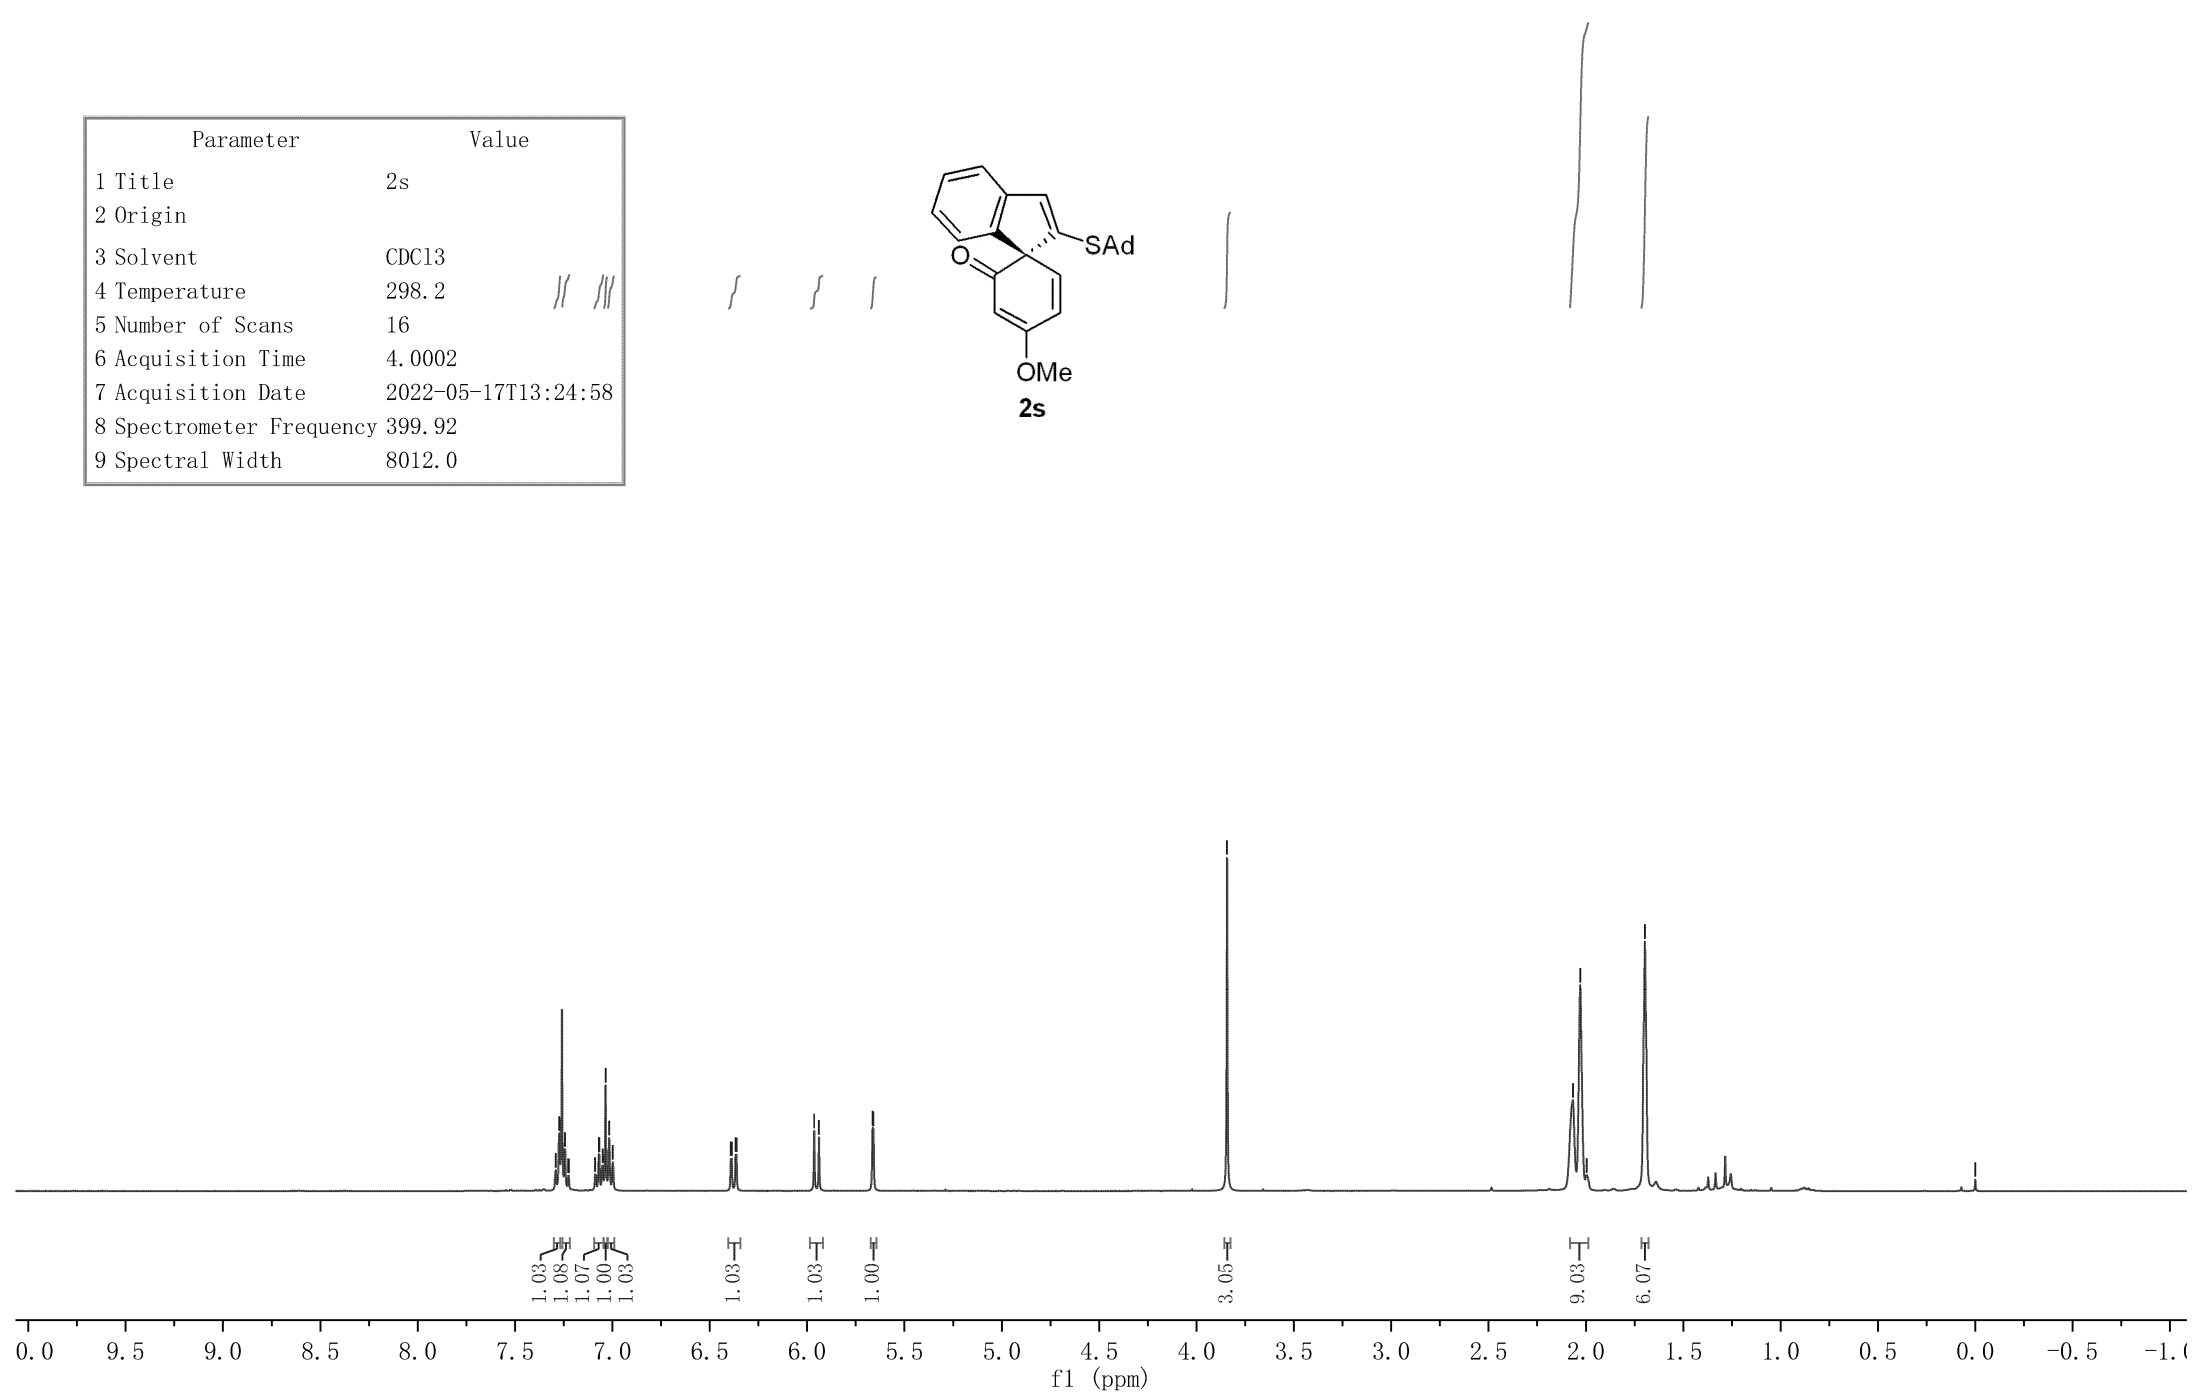

| Parameter                | Value               |
|--------------------------|---------------------|
| 1 Title                  | 2s                  |
| 2 Origin                 |                     |
| 3 Solvent                | CDC13               |
| 4 Temperature            | 298.5               |
| 5 Number of Scans        | 200                 |
| 6 Acquisition Time       | 1.0000              |
| 7 Acquisition Date       | 2022-05-17T13:53:46 |
| 8 Spectrometer Frequency | 100.56              |
| 9 Spectral Width         | 26041.0             |

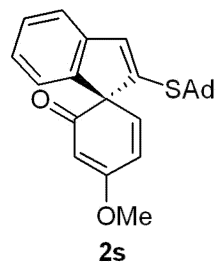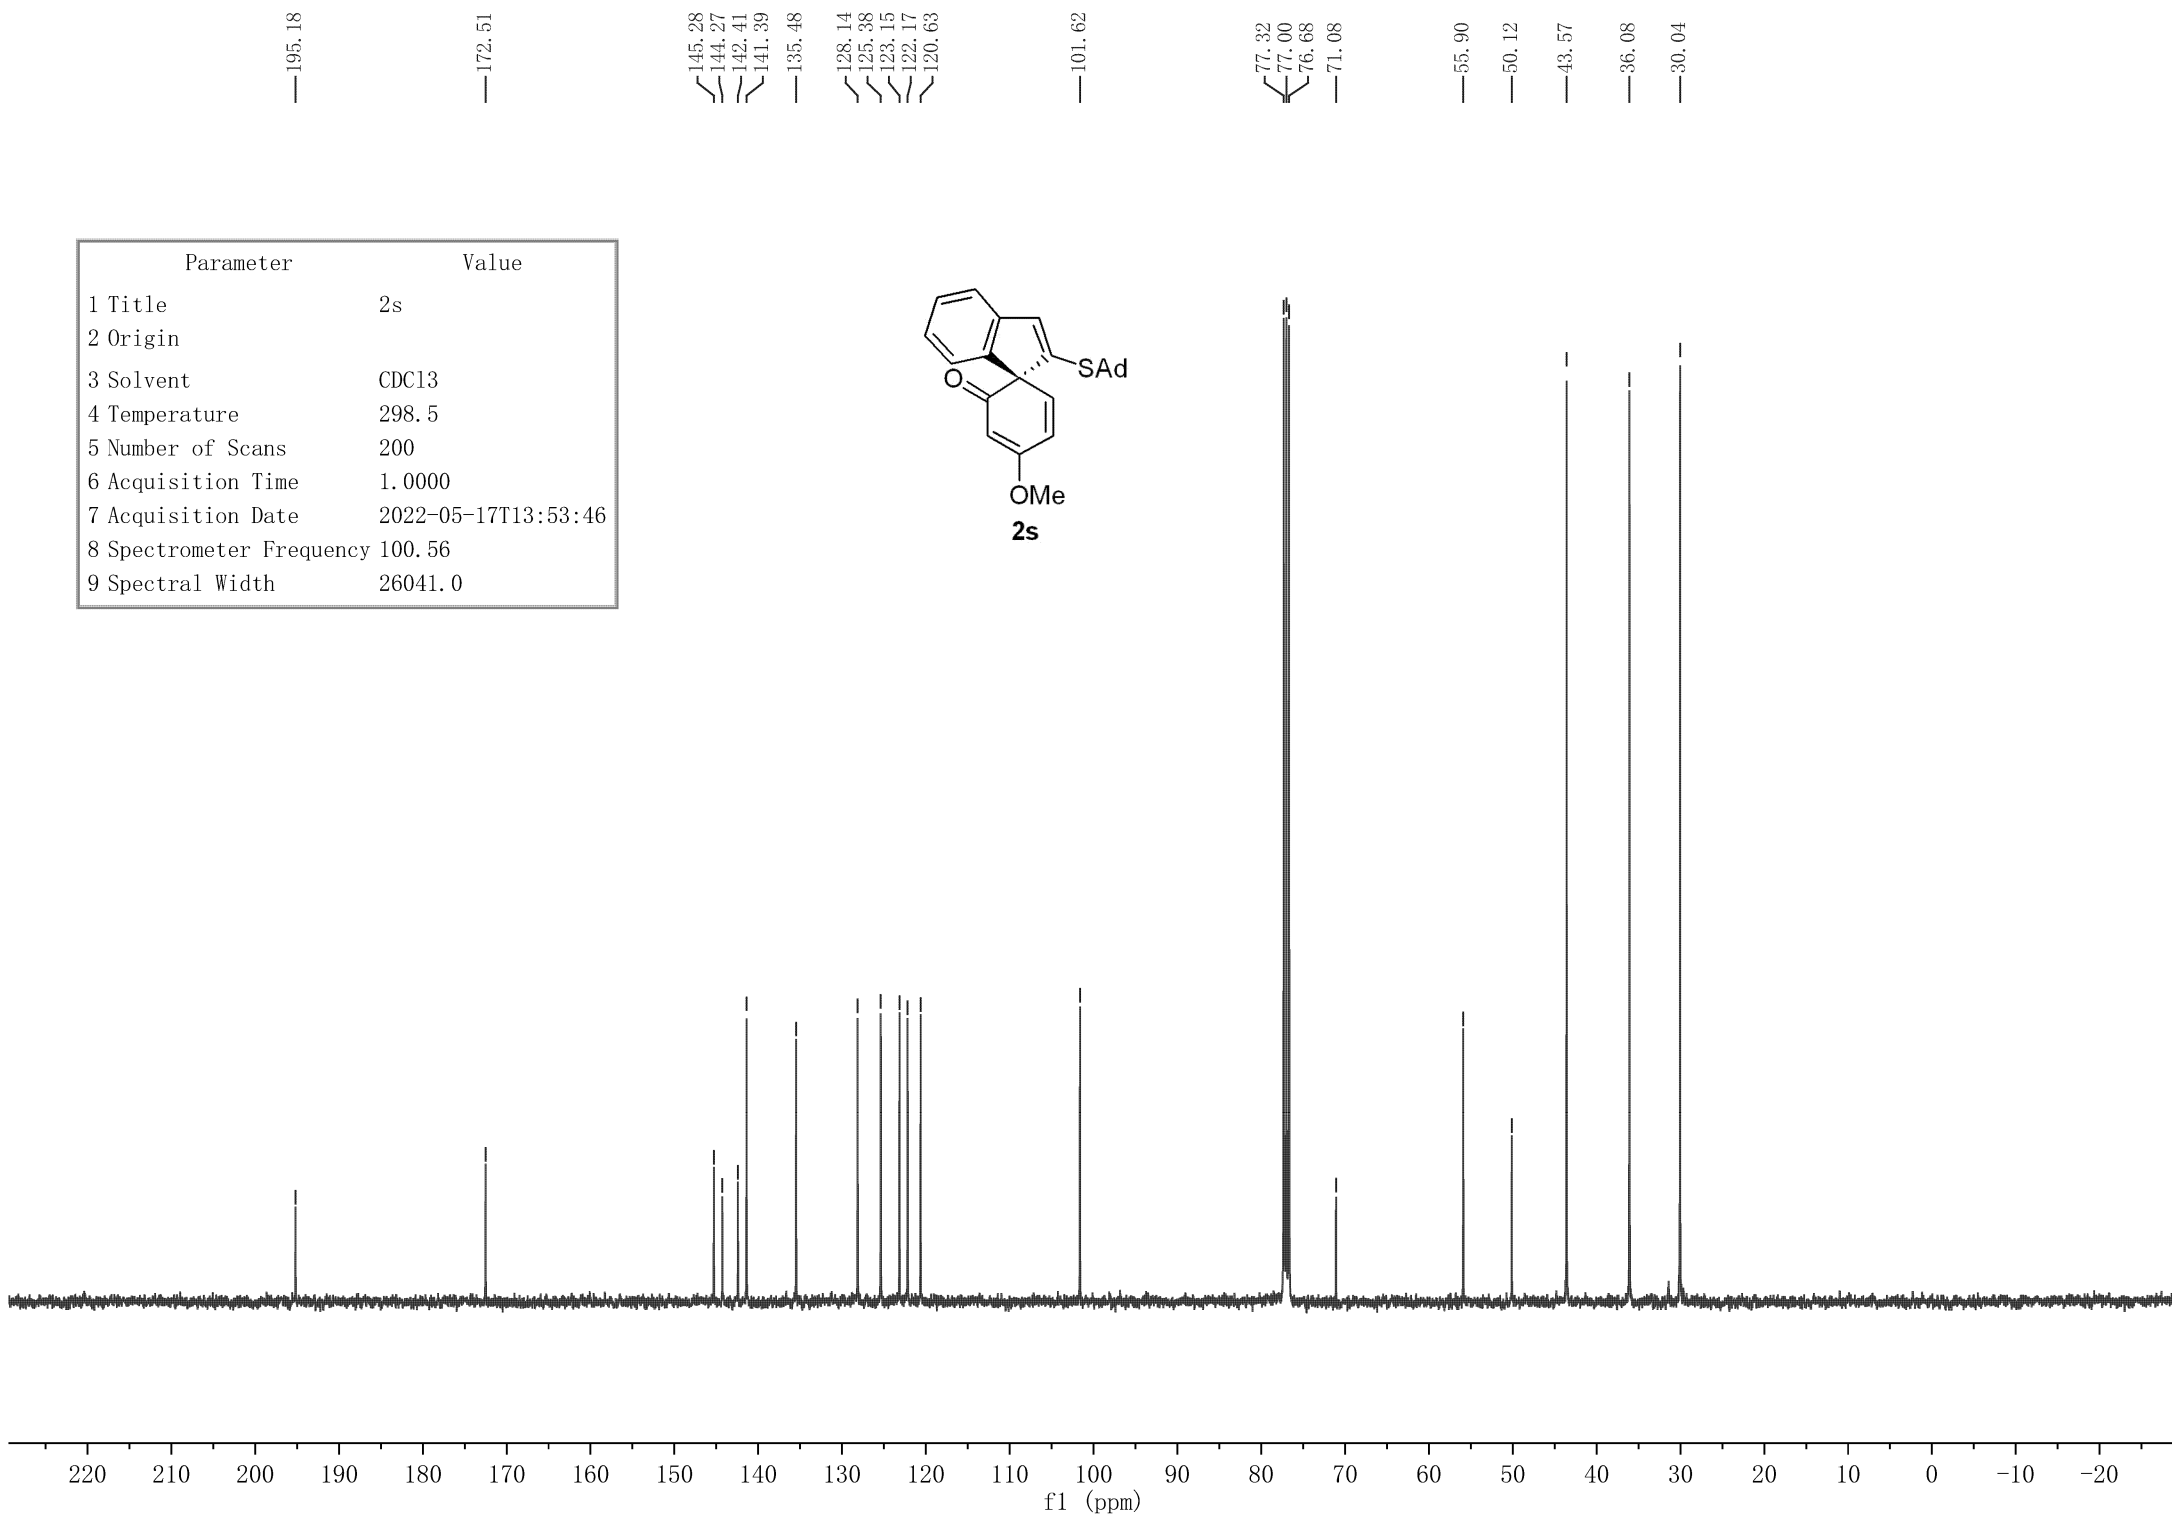

| Parameter                | Value               |
|--------------------------|---------------------|
| 1 Title                  | fxy-13-203          |
| 2 Origin                 |                     |
| 3 Solvent                | CDC13               |
| 4 Temperature            | 299.8               |
| 5 Number of Scans        | 16                  |
| 6 Acquisition Time       | 4.0002              |
| 7 Acquisition Date       | 2023-08-22T07:50:02 |
| 8 Spectrometer Frequency | 399.90              |
| 9 Spectral Width         | 8012.0              |

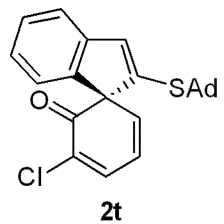

7.378  
7.361  
7.286  
7.269  
7.253  
7.242  
7.100  
7.095  
7.081  
7.060  
7.024  
7.007  
6.988  
6.434  
6.417  
6.411  
6.394  
5.896  
5.873

2.064  
2.018  
1.983  
1.949  
1.682

— 0.000

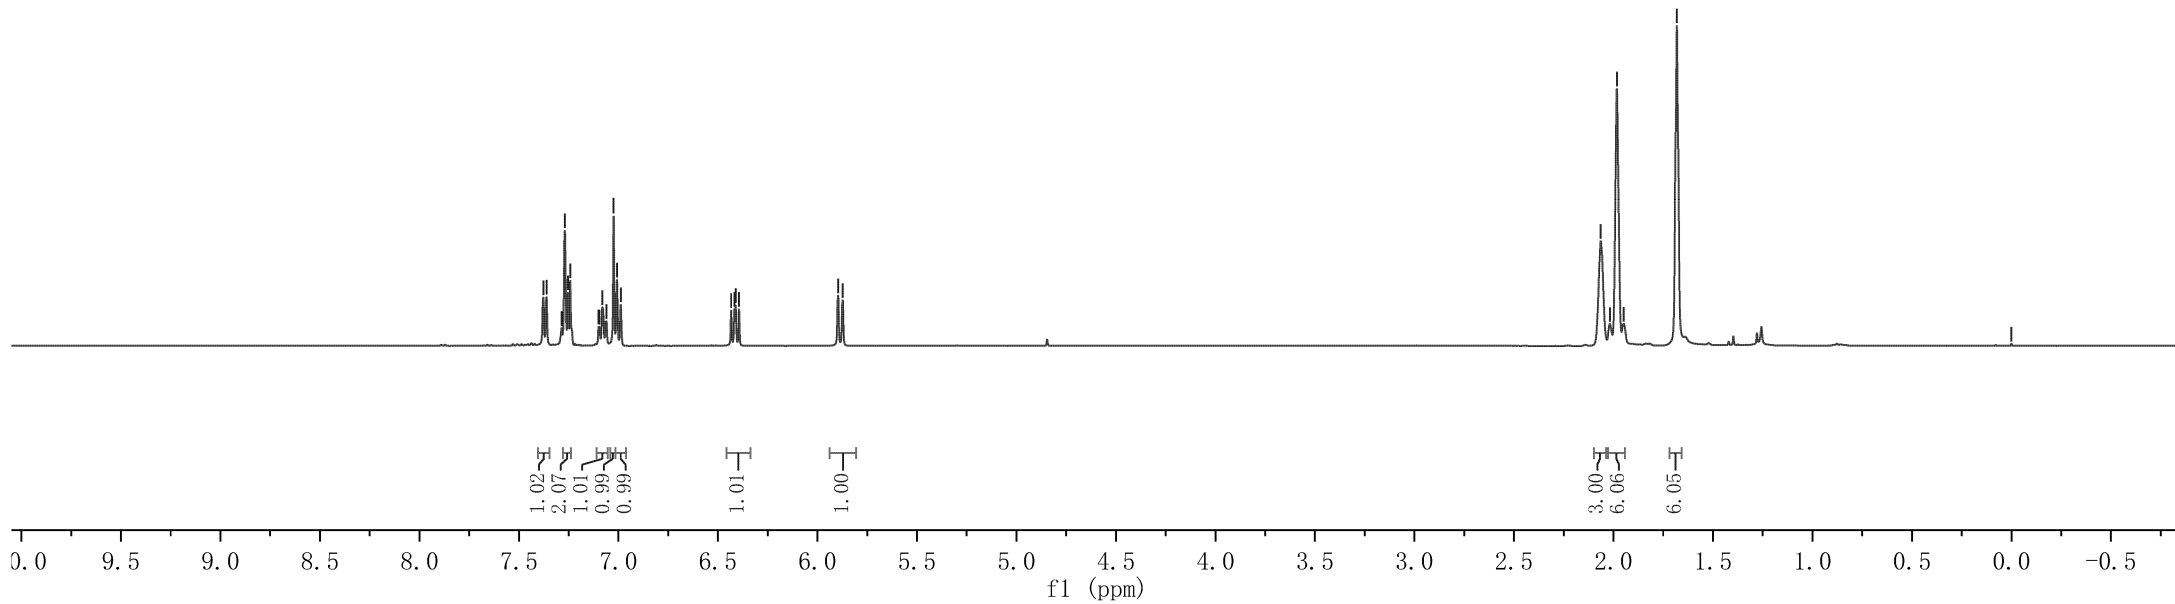

| Parameter                | Value               |
|--------------------------|---------------------|
| 1 Title                  | fxv-13-203          |
| 2 Origin                 |                     |
| 3 Solvent                | CDC13               |
| 4 Temperature            | 299.4               |
| 5 Number of Scans        | 100                 |
| 6 Acquisition Time       | 1.0000              |
| 7 Acquisition Date       | 2023-08-22T07:55:50 |
| 8 Spectrometer Frequency | 100.56              |
| 9 Spectral Width         | 26041.0             |

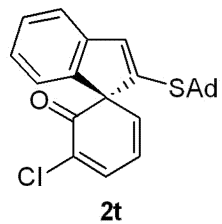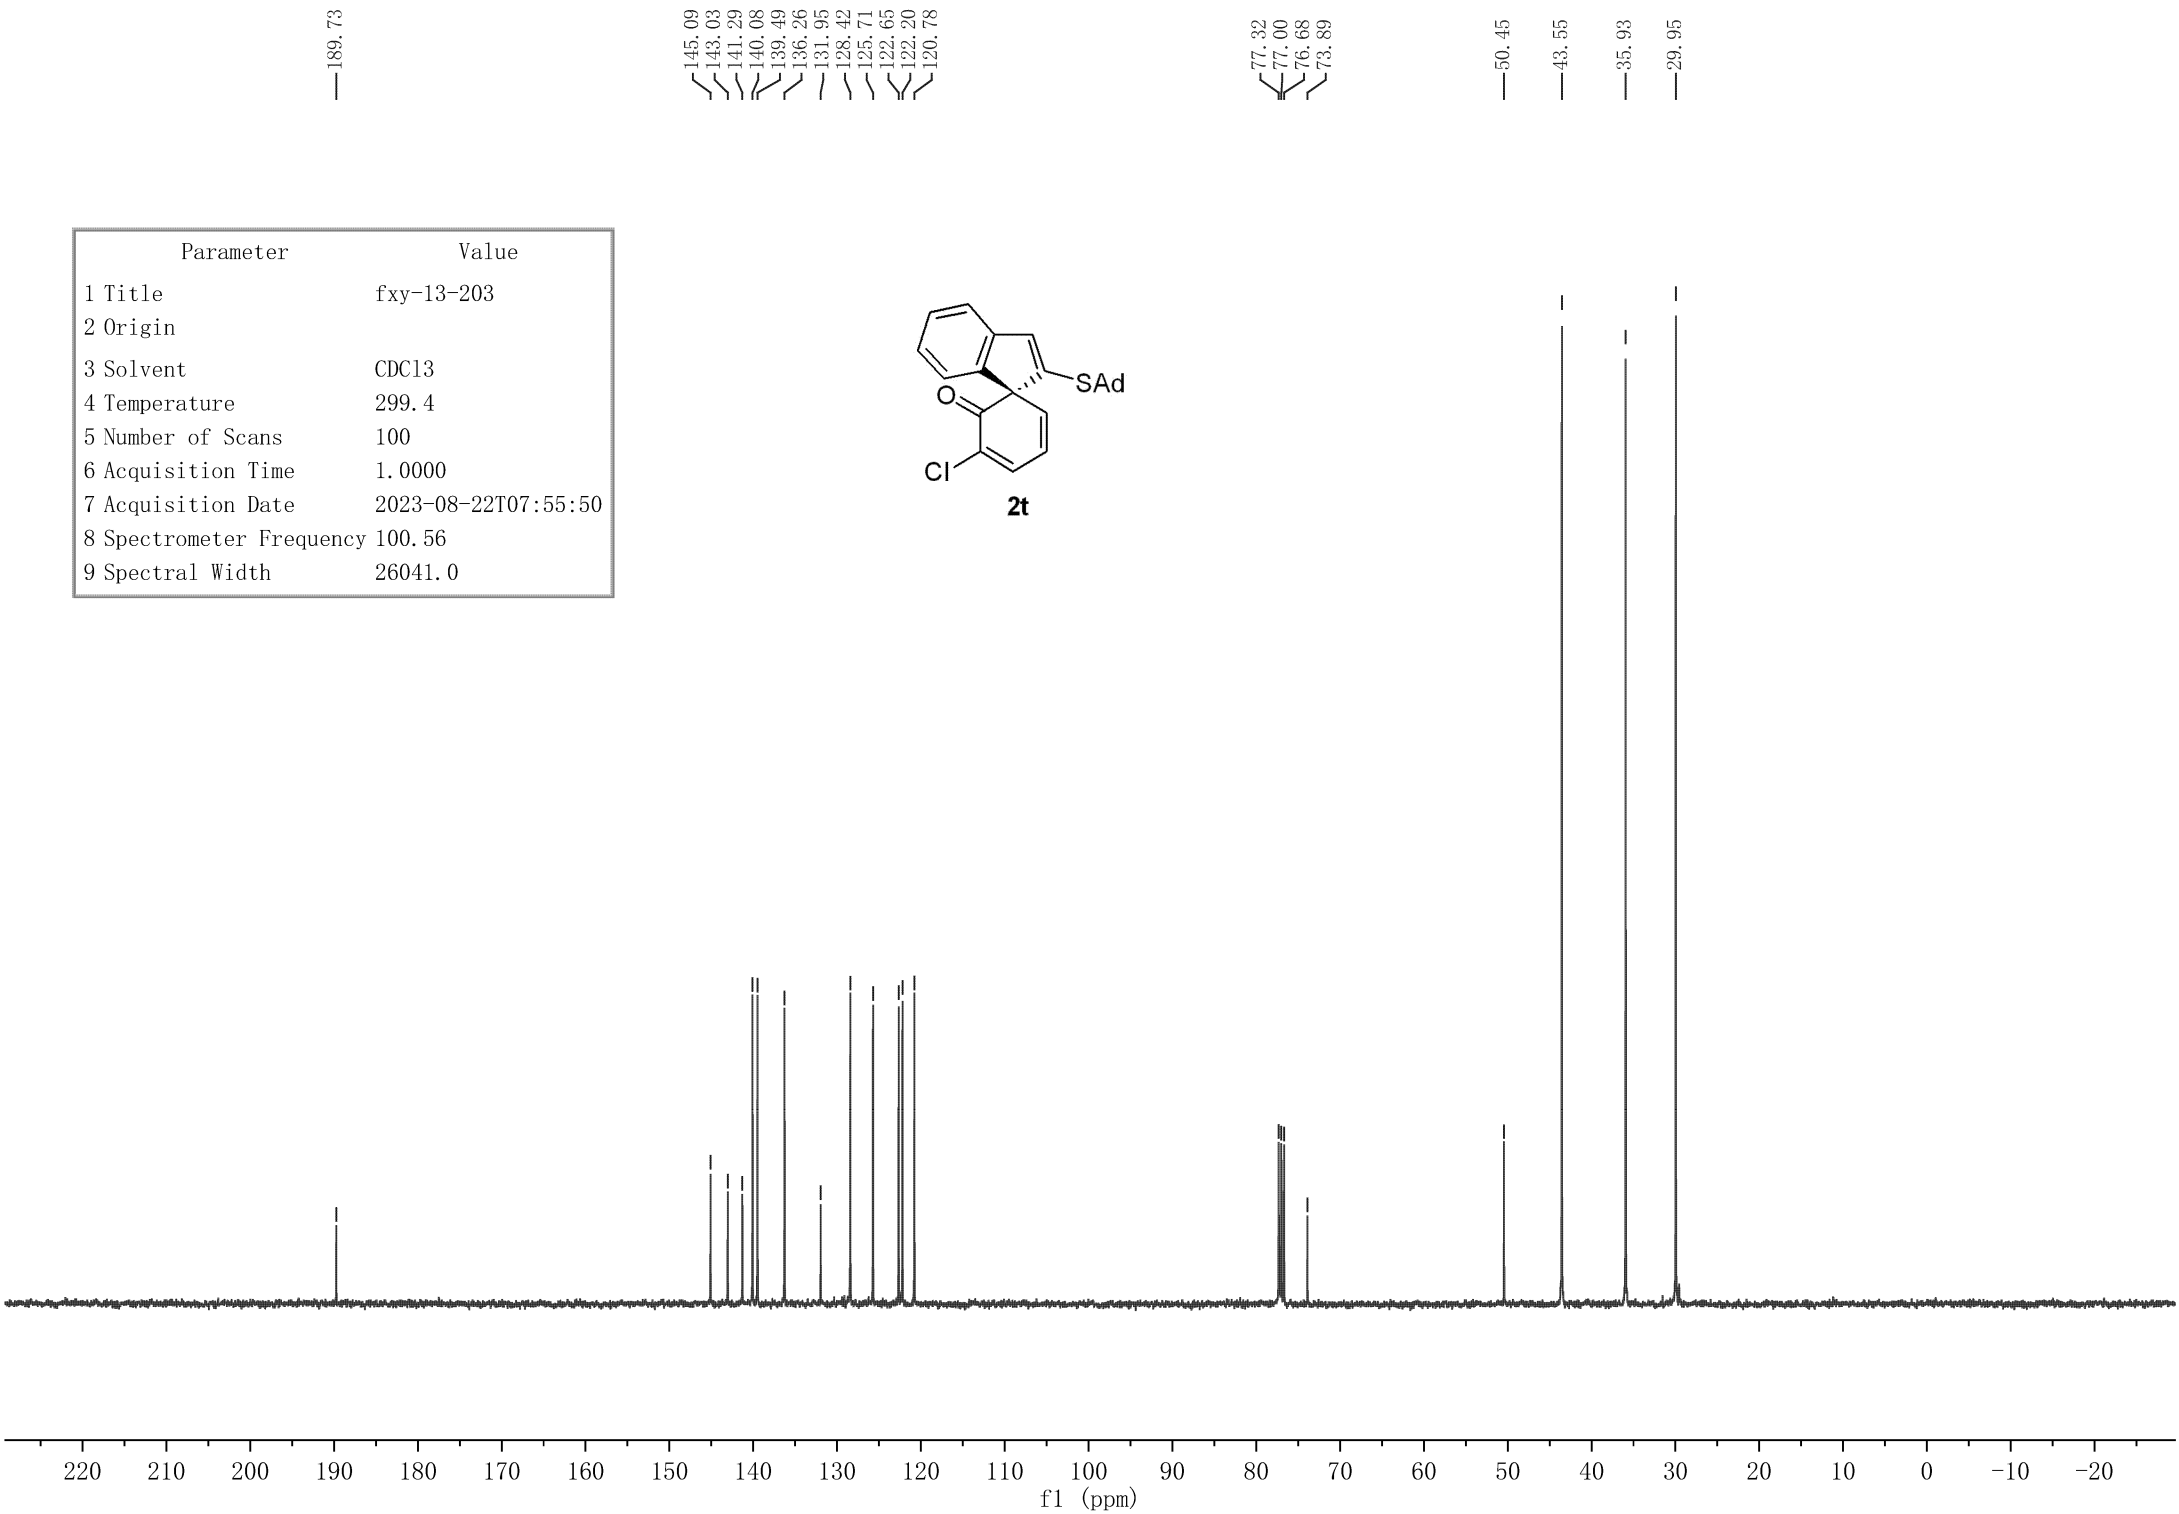

| Parameter                | Value               |
|--------------------------|---------------------|
| 1 Title                  | fxv-2v              |
| 2 Origin                 |                     |
| 3 Solvent                | CDC13               |
| 4 Temperature            | 300.5               |
| 5 Number of Scans        | 16                  |
| 6 Acquisition Time       | 4.0002              |
| 7 Acquisition Date       | 2023-08-09T22:53:26 |
| 8 Spectrometer Frequency | 399.90              |
| 9 Spectral Width         | 8012.0              |

7.276  
7.250  
7.231  
7.213  
7.073  
7.055  
7.038  
7.014  
6.999  
6.979  
6.439  
6.424  
6.416  
6.401  
5.848  
5.825

2.071  
2.009  
1.923  
1.696

0.000

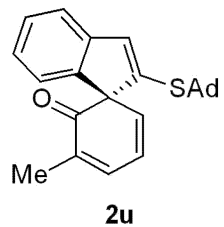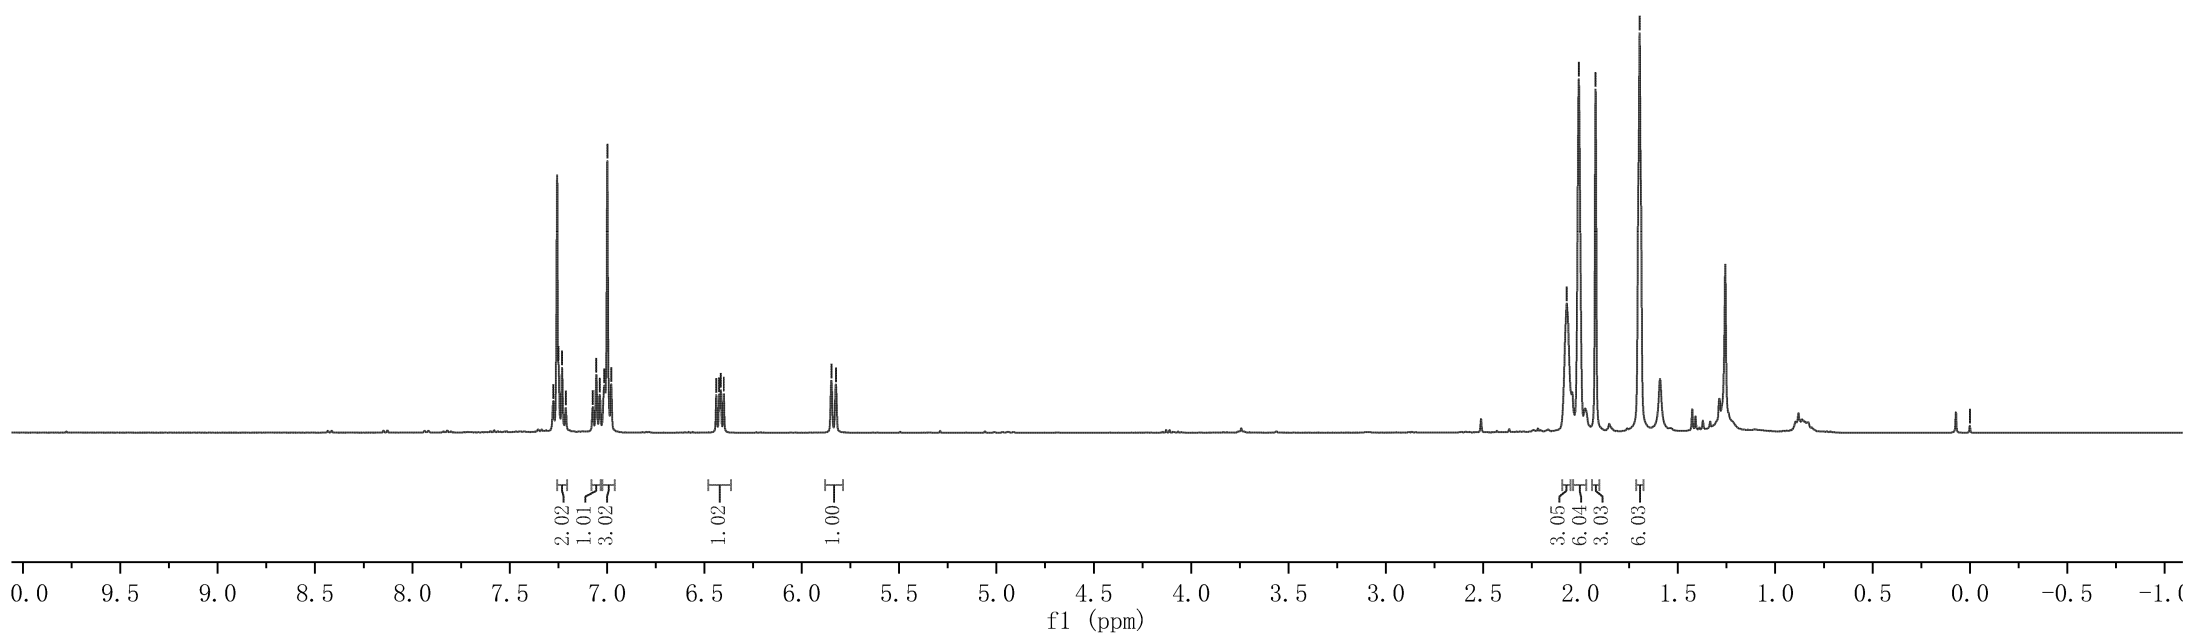

| Parameter                | Value               |
|--------------------------|---------------------|
| 1 Title                  | fxv-2v              |
| 2 Origin                 |                     |
| 3 Solvent                | CDC13               |
| 4 Temperature            | 300.3               |
| 5 Number of Scans        | 500                 |
| 6 Acquisition Time       | 1.0000              |
| 7 Acquisition Date       | 2023-08-09T23:13:16 |
| 8 Spectrometer Frequency | 100.56              |
| 9 Spectral Width         | 26041.0             |

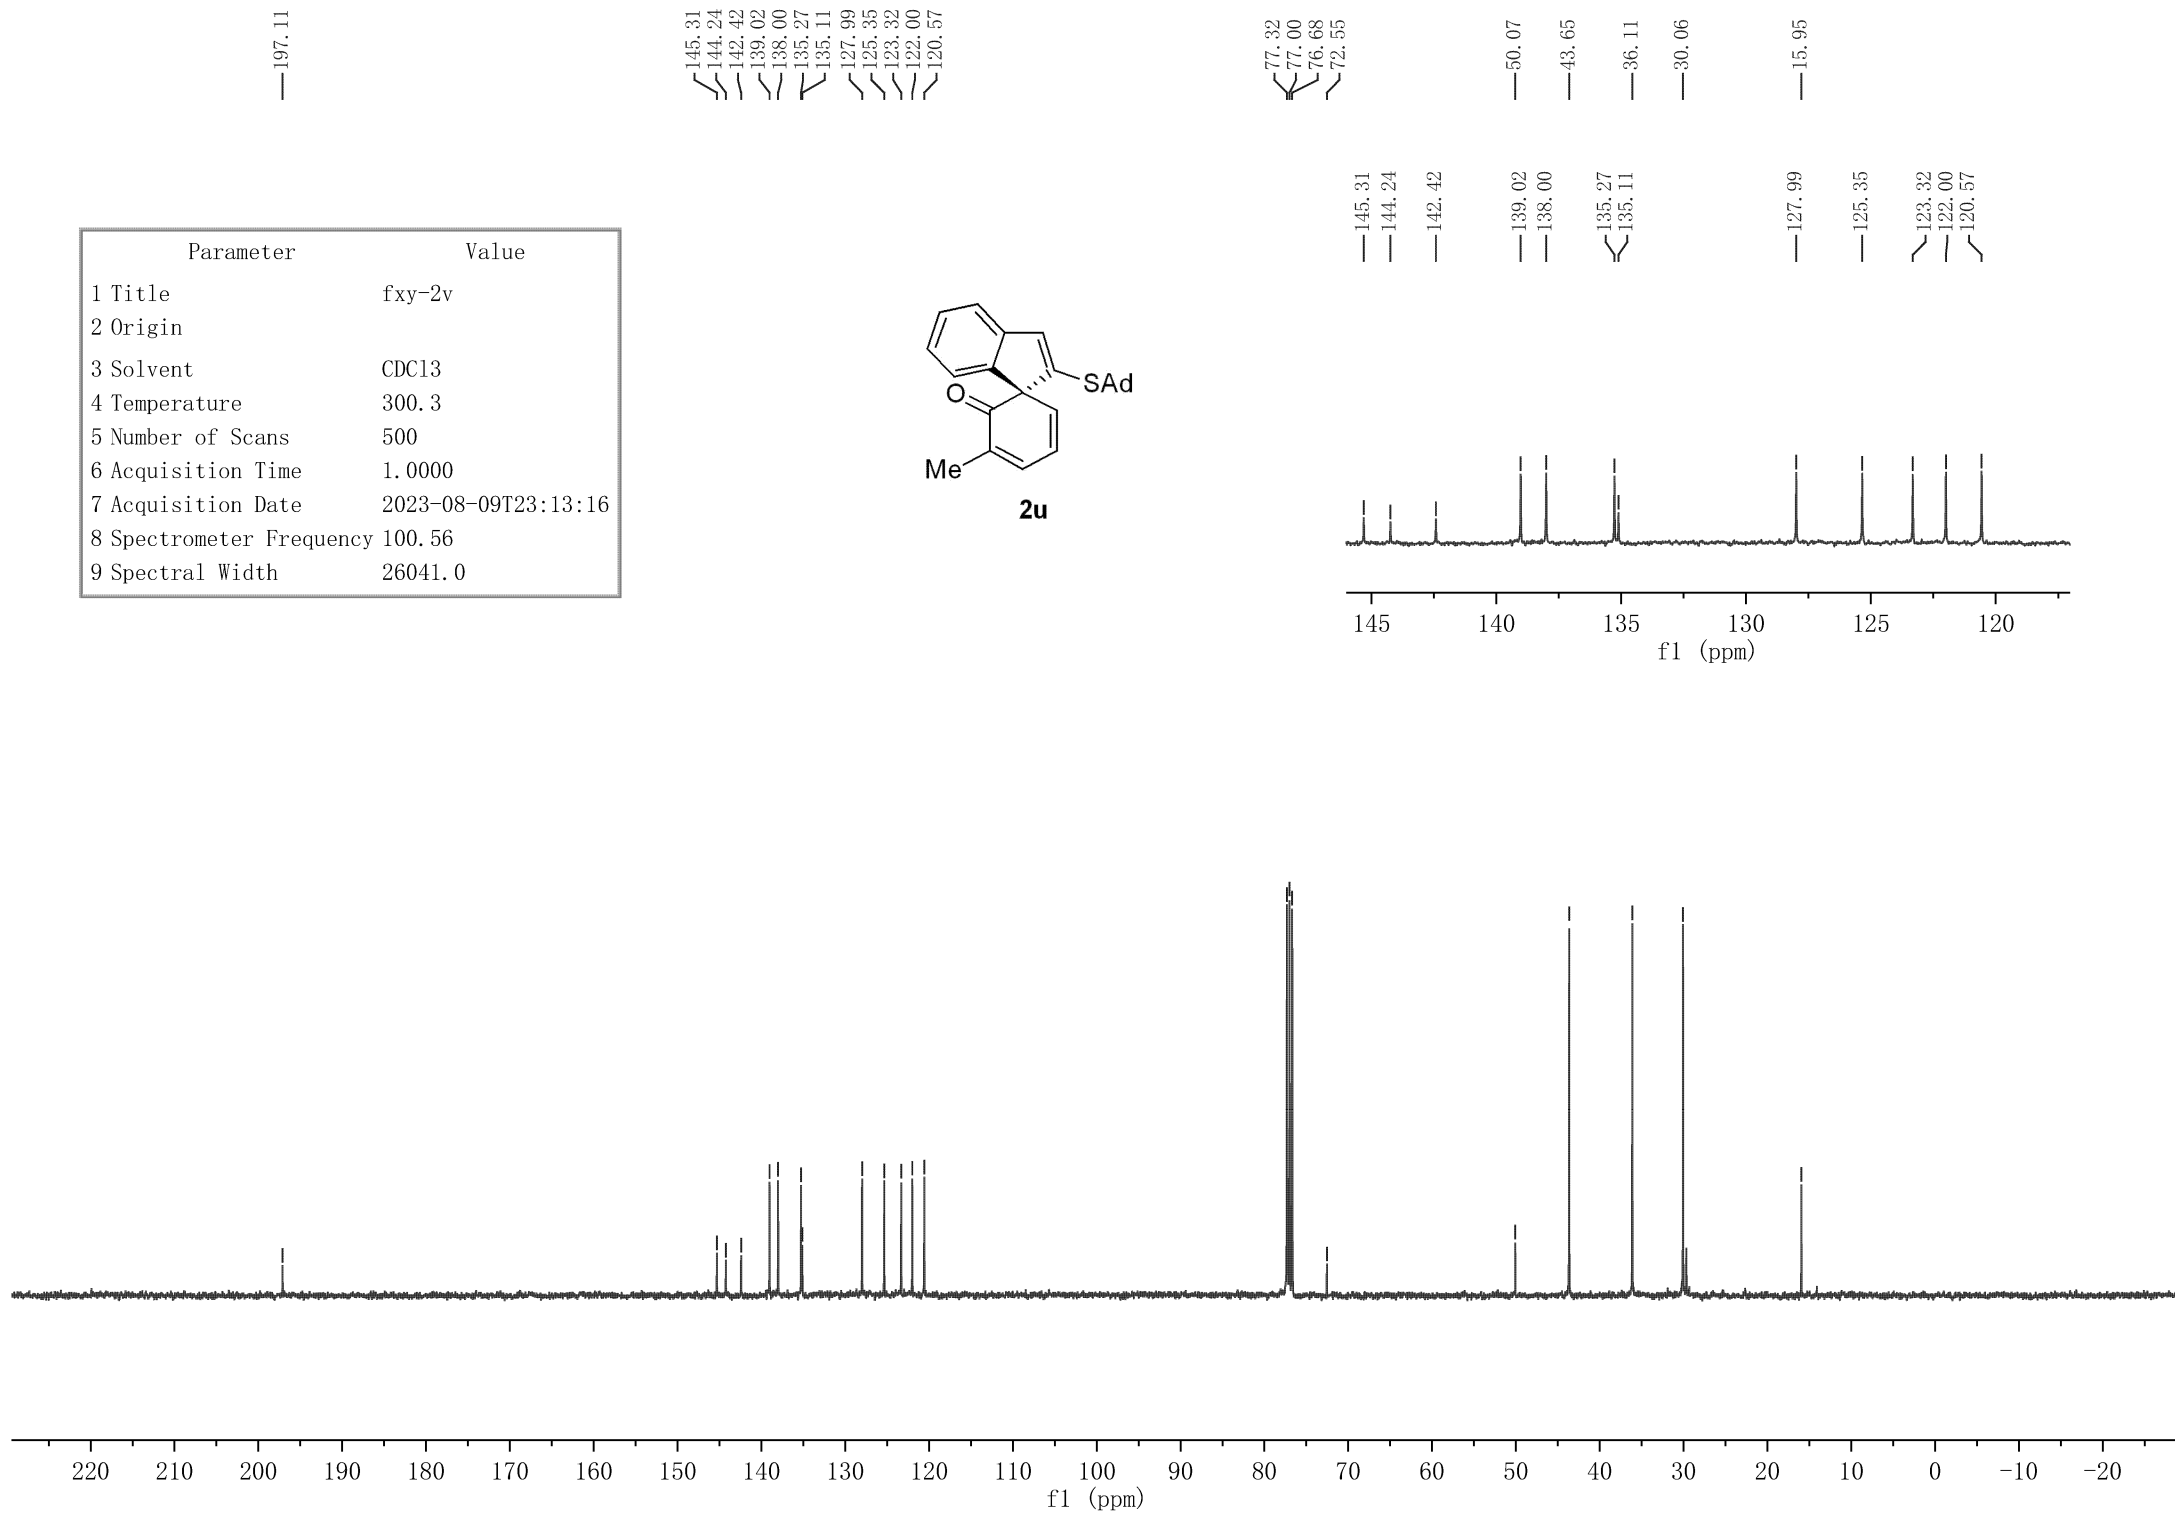

| Parameter                | Value               |
|--------------------------|---------------------|
| 1 Title                  | 2ac                 |
| 2 Origin                 |                     |
| 3 Solvent                | CDC13               |
| 4 Temperature            | 299.5               |
| 5 Number of Scans        | 16                  |
| 6 Acquisition Time       | 4.0002              |
| 7 Acquisition Date       | 2023-08-17T00:28:46 |
| 8 Spectrometer Frequency | 399.90              |
| 9 Spectral Width         | 8012.0              |

7.295  
7.276  
7.265  
7.251  
7.227  
7.213  
7.198  
7.086  
7.067  
7.049  
7.016  
7.006  
6.499  
6.491  
6.476  
6.231  
6.207  
5.960  
5.937

2.110  
1.983  
1.940  
1.880  
1.848  
1.718  
1.647  
1.617  
1.570  
1.539  
1.426  
0.841  
0.000

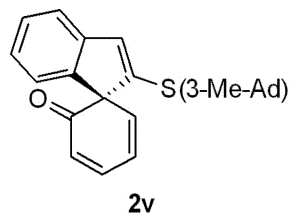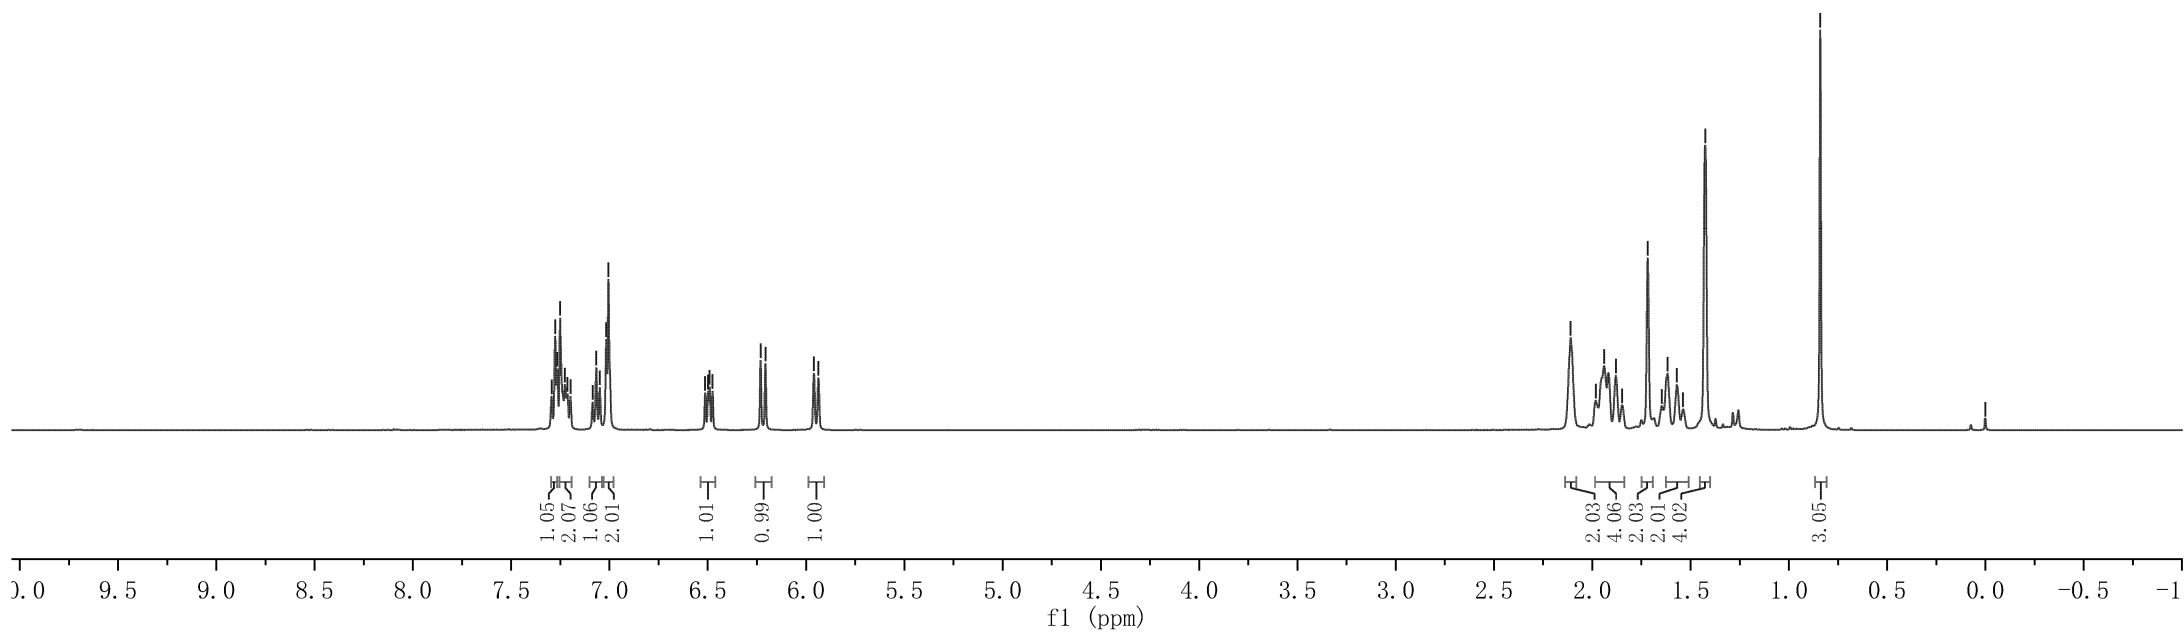

—197.04

| Parameter                | Value               |
|--------------------------|---------------------|
| 1 Title                  | 2ac                 |
| 2 Origin                 |                     |
| 3 Solvent                | CDC13               |
| 4 Temperature            | 299.1               |
| 5 Number of Scans        | 300                 |
| 6 Acquisition Time       | 1.0000              |
| 7 Acquisition Date       | 2023-08-17T00:41:16 |
| 8 Spectrometer Frequency | 100.56              |
| 9 Spectral Width         | 26041.0             |

145.28  
143.67  
142.71  
142.22  
140.69  
135.25  
128.18  
127.45  
125.42  
122.95  
122.14  
120.66

77.32  
77.00  
76.68  
72.79

50.55  
50.23  
43.07  
42.82  
42.73  
35.25  
32.38  
30.56  
30.39  
30.38

145.28  
143.67  
142.71  
142.22  
140.69

135.25

128.18  
127.45

125.42  
122.95  
122.14  
120.66

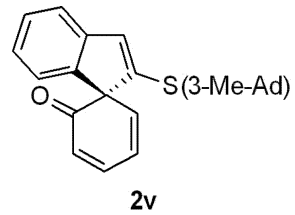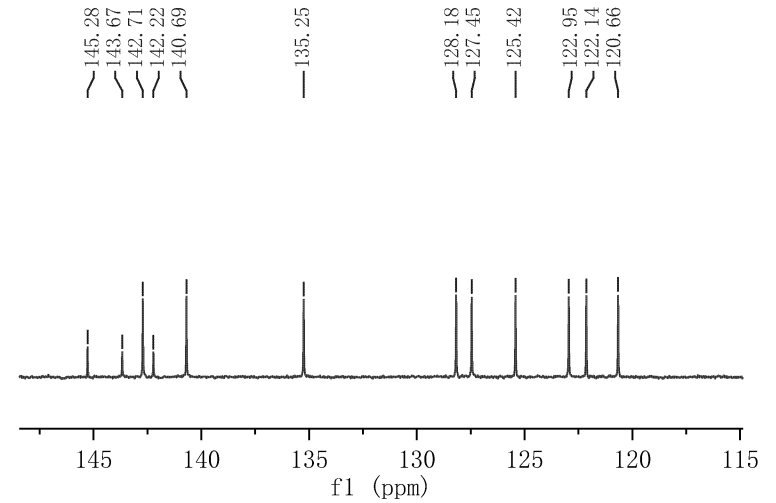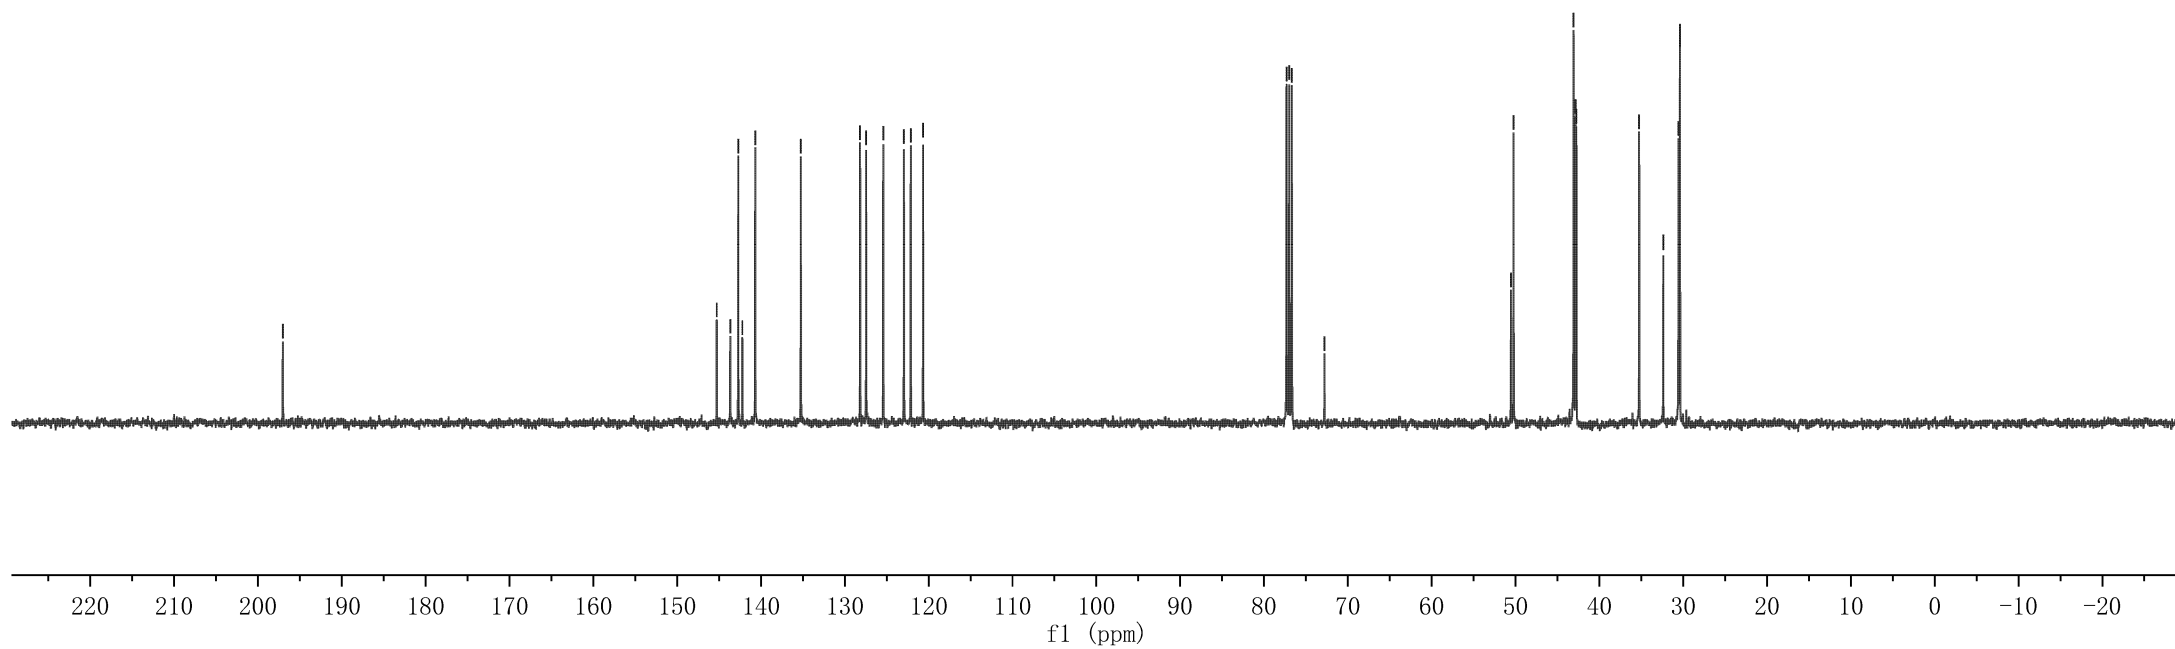



| Parameter                | Value               |
|--------------------------|---------------------|
| 1 Title                  | FXY-2ad-P           |
| 2 Origin                 |                     |
| 3 Solvent                | CDC13               |
| 4 Temperature            | 300.2               |
| 5 Number of Scans        | 16                  |
| 6 Acquisition Time       | 4.0002              |
| 7 Acquisition Date       | 2023-08-09T22:28:45 |
| 8 Spectrometer Frequency | 399.90              |
| 9 Spectral Width         | 8012.0              |

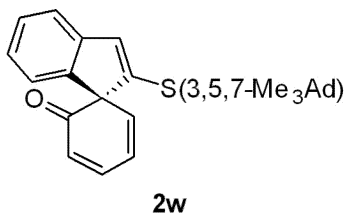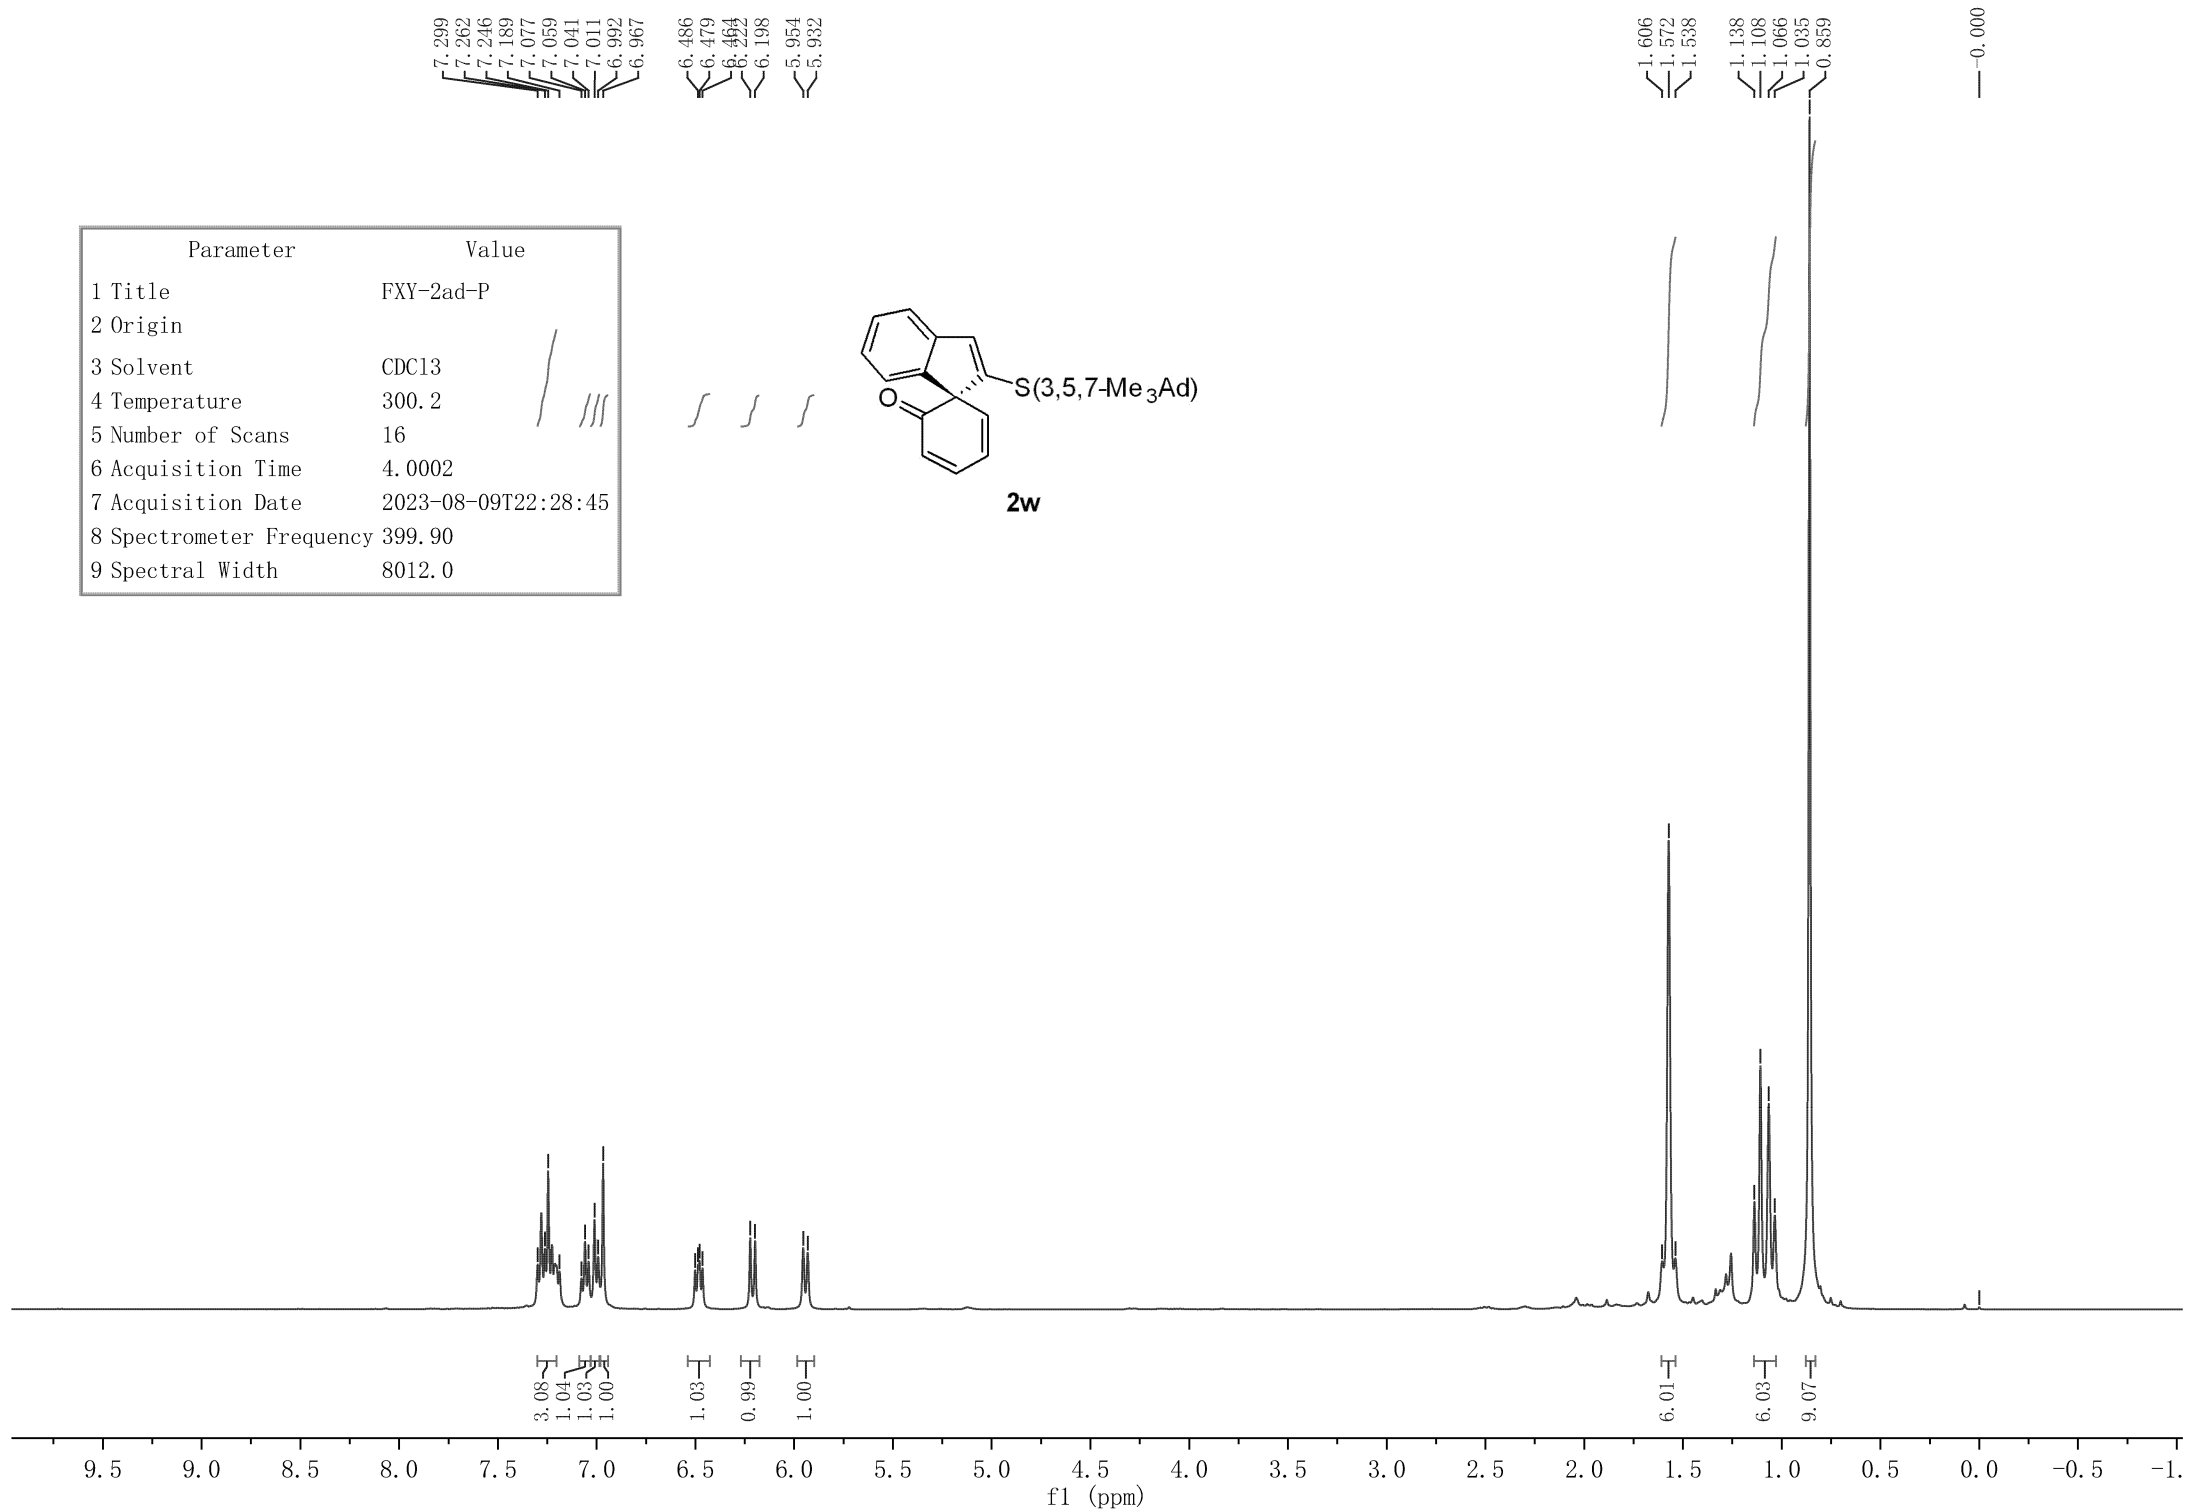

| Parameter                | Value               |
|--------------------------|---------------------|
| 1 Title                  | FXY-2ad-P           |
| 2 Origin                 |                     |
| 3 Solvent                | CDC13               |
| 4 Temperature            | 300.5               |
| 5 Number of Scans        | 500                 |
| 6 Acquisition Time       | 1.0000              |
| 7 Acquisition Date       | 2023-08-09T22:47:53 |
| 8 Spectrometer Frequency | 100.56              |
| 9 Spectral Width         | 26041.0             |

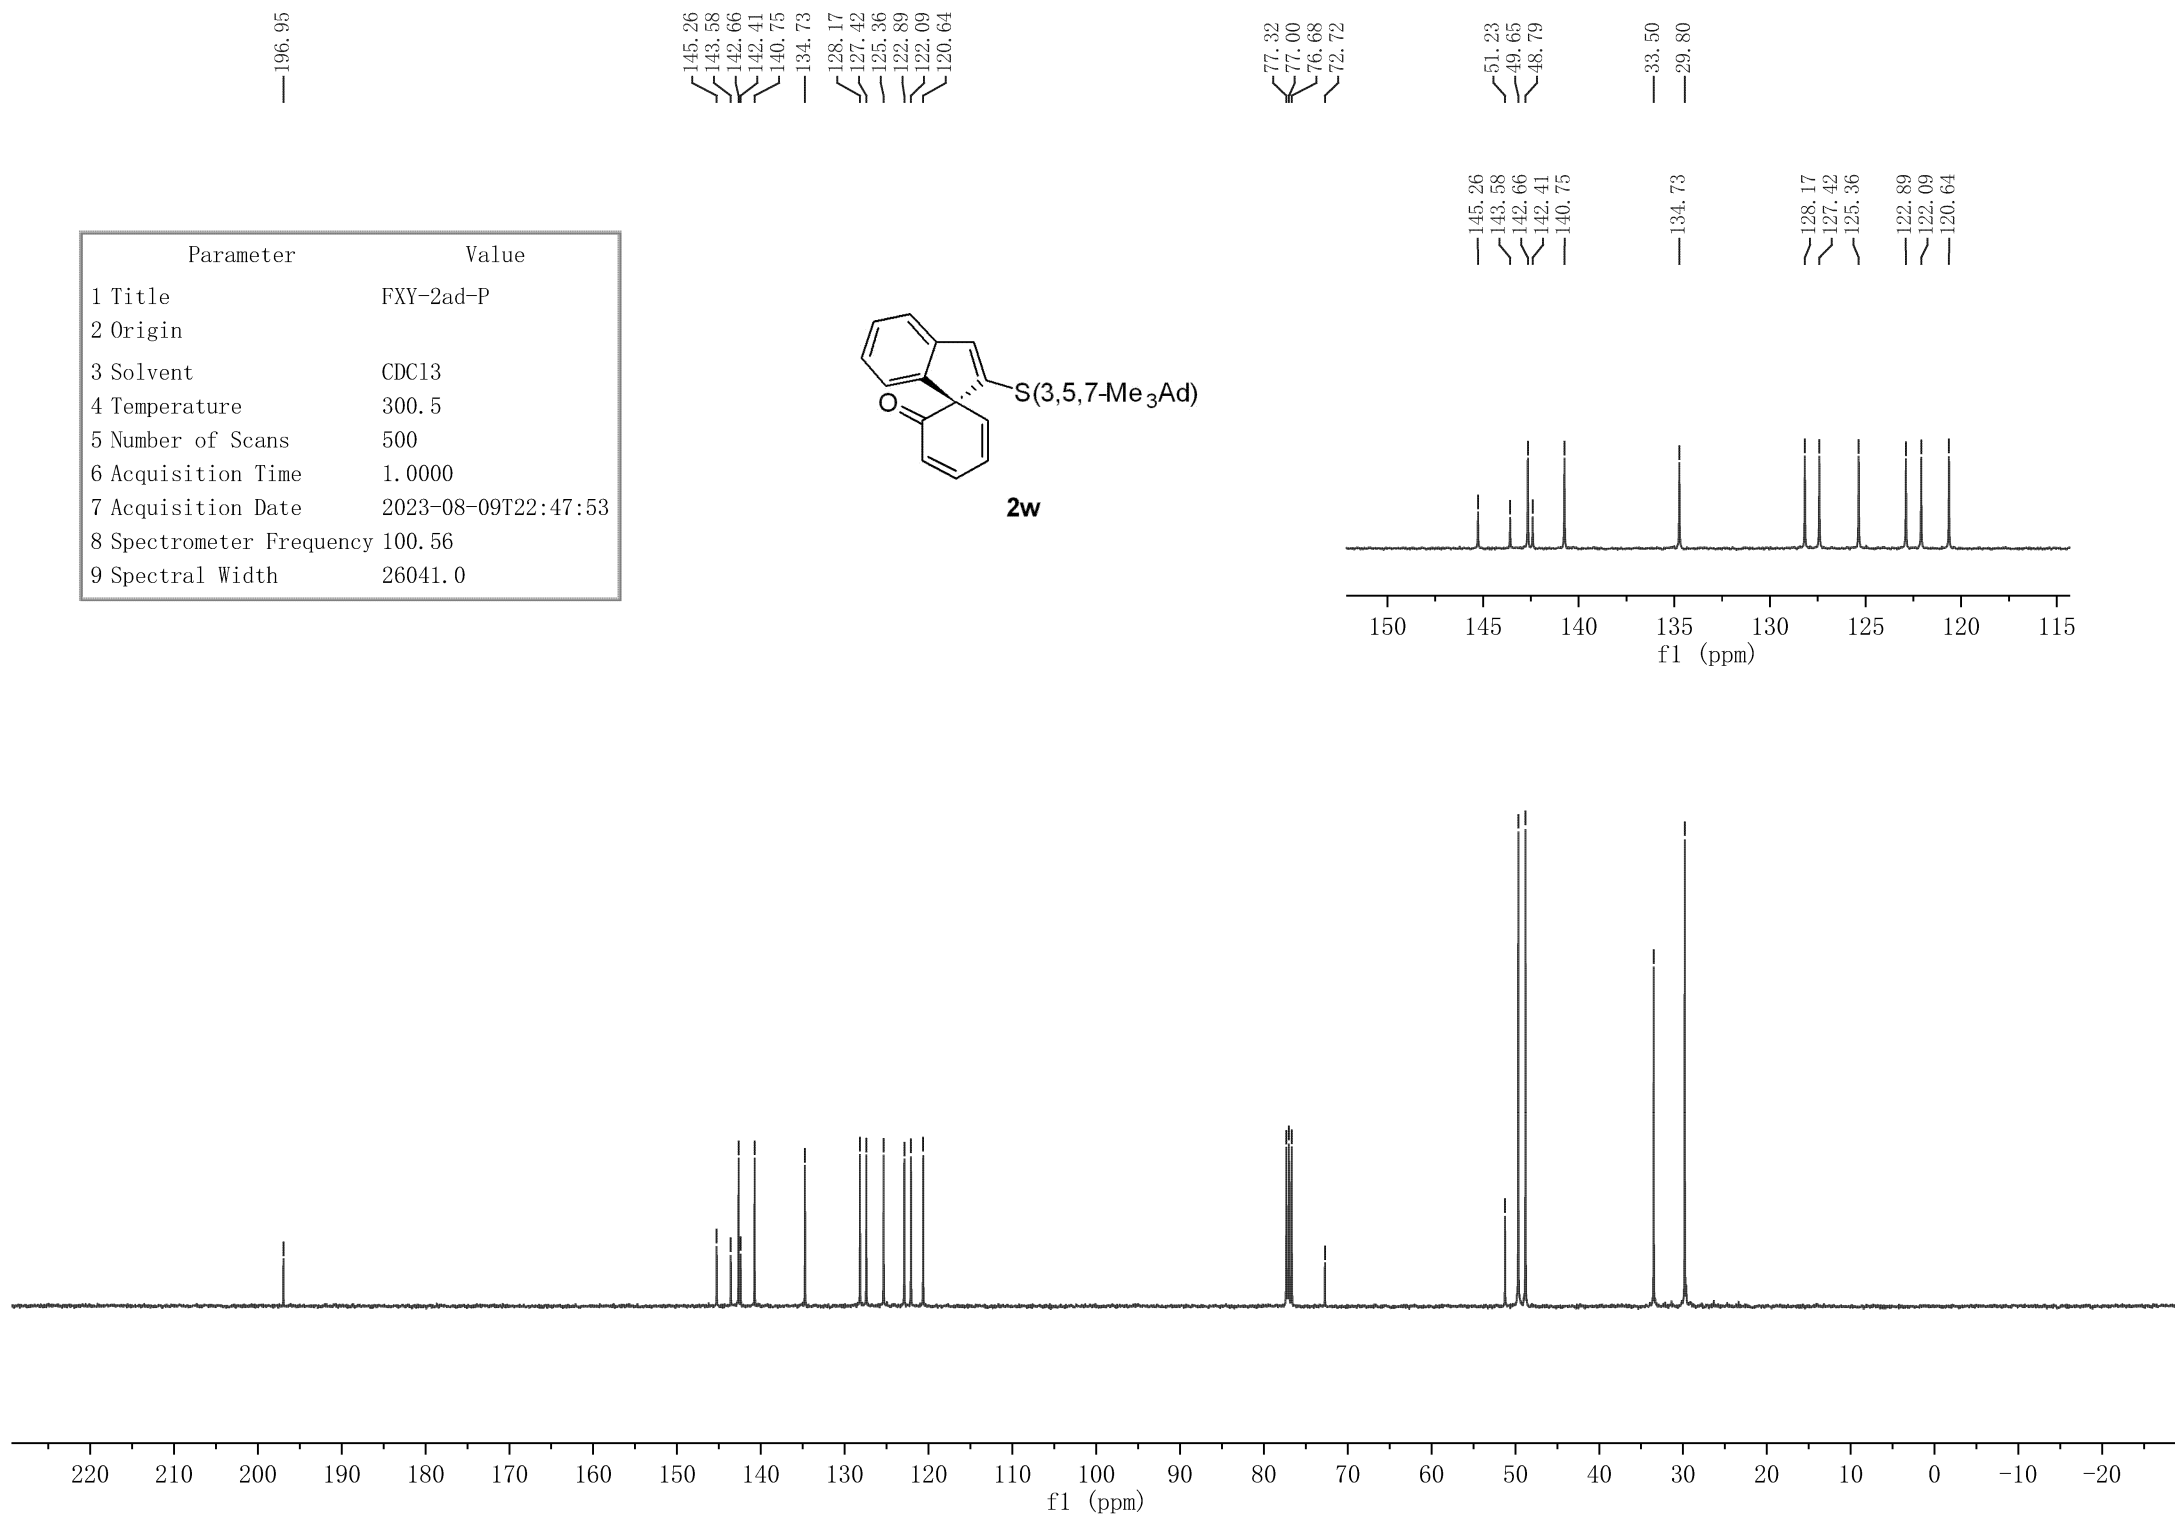

| Parameter                | Value               |
|--------------------------|---------------------|
| 1 Title                  | fxv-8-188           |
| 2 Origin                 | Bruker BioSpin GmbH |
| 3 Solvent                | CDC13               |
| 4 Temperature            | 298.0               |
| 5 Number of Scans        | 6                   |
| 6 Acquisition Time       | 4.0894              |
| 7 Acquisition Date       | 2022-06-22T22:44:53 |
| 8 Spectrometer Frequency | 400.13              |
| 9 Spectral Width         | 8012.8              |

7.259  
7.240  
7.235  
7.231  
7.220  
7.216  
7.210  
7.201  
7.010  
7.005  
6.999  
6.995  
6.637  
6.500  
6.492  
6.477  
6.445  
6.221  
6.025  
6.022  
6.001  
5.999

3.662

2.154  
2.127  
2.098  
2.015  
1.956  
1.920  
1.871  
1.824  
1.745  
1.603  
1.598  
1.570  
1.565

0.000

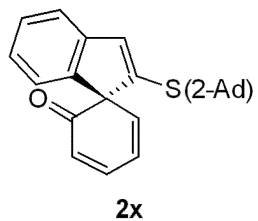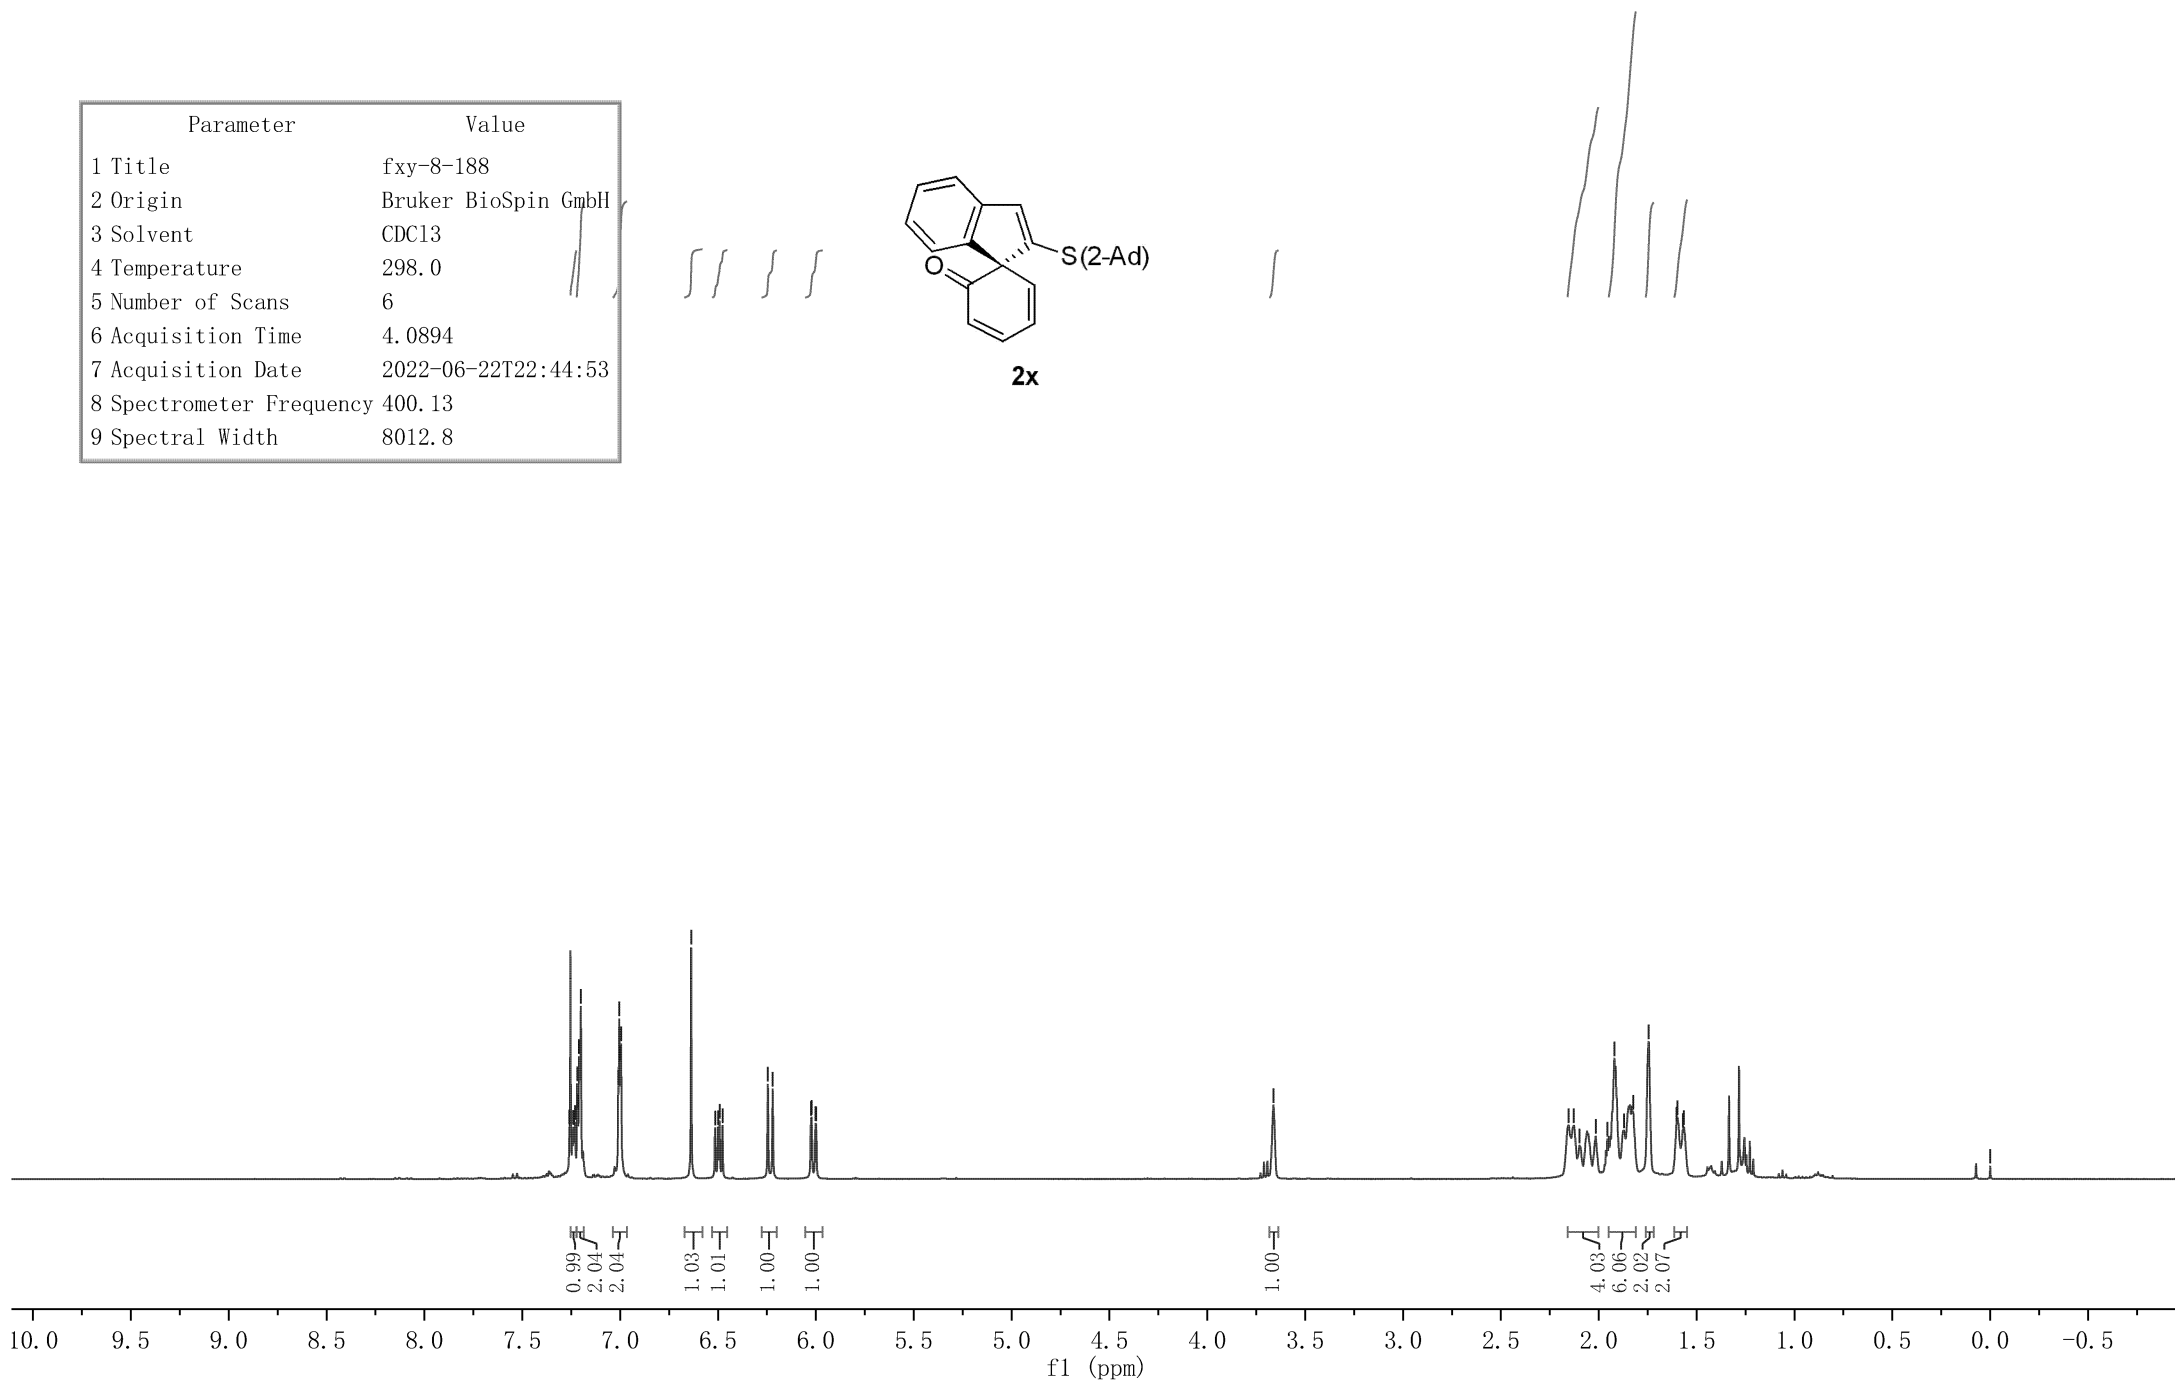

| Parameter                | Value               |
|--------------------------|---------------------|
| 1 Title                  | fxv-8-188-C         |
| 2 Origin                 | Bruker BioSpin GmbH |
| 3 Solvent                | CDC13               |
| 4 Temperature            | 300.0               |
| 5 Number of Scans        | 113                 |
| 6 Acquisition Time       | 1.3631              |
| 7 Acquisition Date       | 2022-06-22T22:45:52 |
| 8 Spectrometer Frequency | 100.61              |
| 9 Spectral Width         | 24038.5             |



— 196.71

147.23  
145.23  
143.08  
142.63  
141.28

128.20  
127.25  
127.16  
124.54  
122.59  
121.79  
119.91

77.32  
77.00  
76.68  
— 71.52

— 54.13

38.58  
38.53  
37.48  
32.77  
32.57  
32.27  
32.24  
27.46  
27.25

— 147.23  
— 145.23  
143.08  
142.63  
141.28

128.20  
127.25  
127.16  
— 124.54  
122.59  
121.79  
119.91

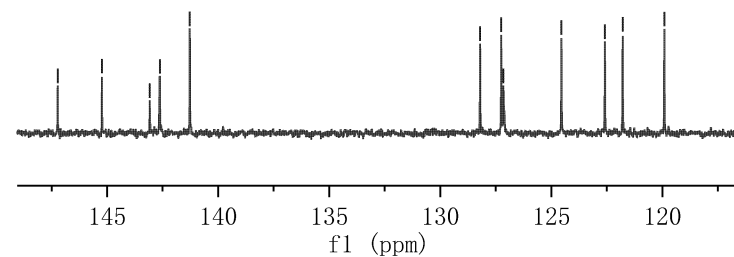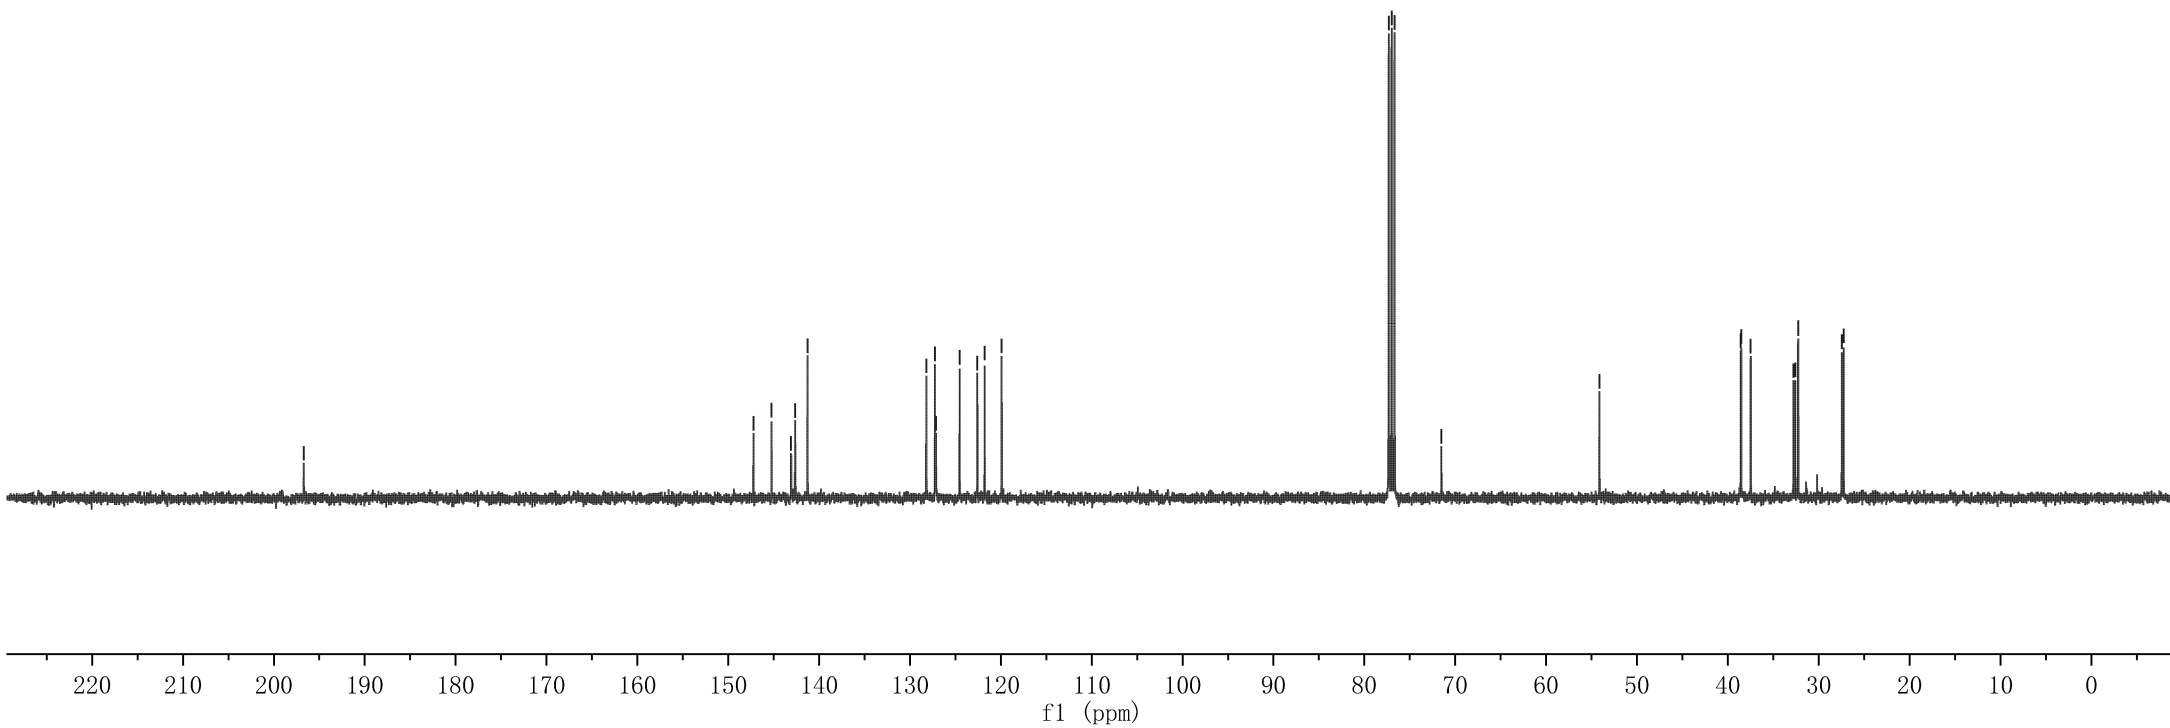

| Parameter                | Value               |
|--------------------------|---------------------|
| 1 Title                  | fxv-StBu-P          |
| 2 Origin                 |                     |
| 3 Solvent                | CDC13               |
| 4 Temperature            | 299.2               |
| 5 Number of Scans        | 16                  |
| 6 Acquisition Time       | 4.0002              |
| 7 Acquisition Date       | 2023-08-14T10:39:05 |
| 8 Spectrometer Frequency | 399.90              |
| 9 Spectral Width         | 8012.0              |

7.208  
7.174  
7.156  
7.134  
7.005  
6.987  
6.947  
6.929  
6.888  
6.427  
6.419  
6.404  
6.161  
6.136  
5.912  
5.889

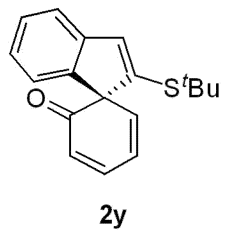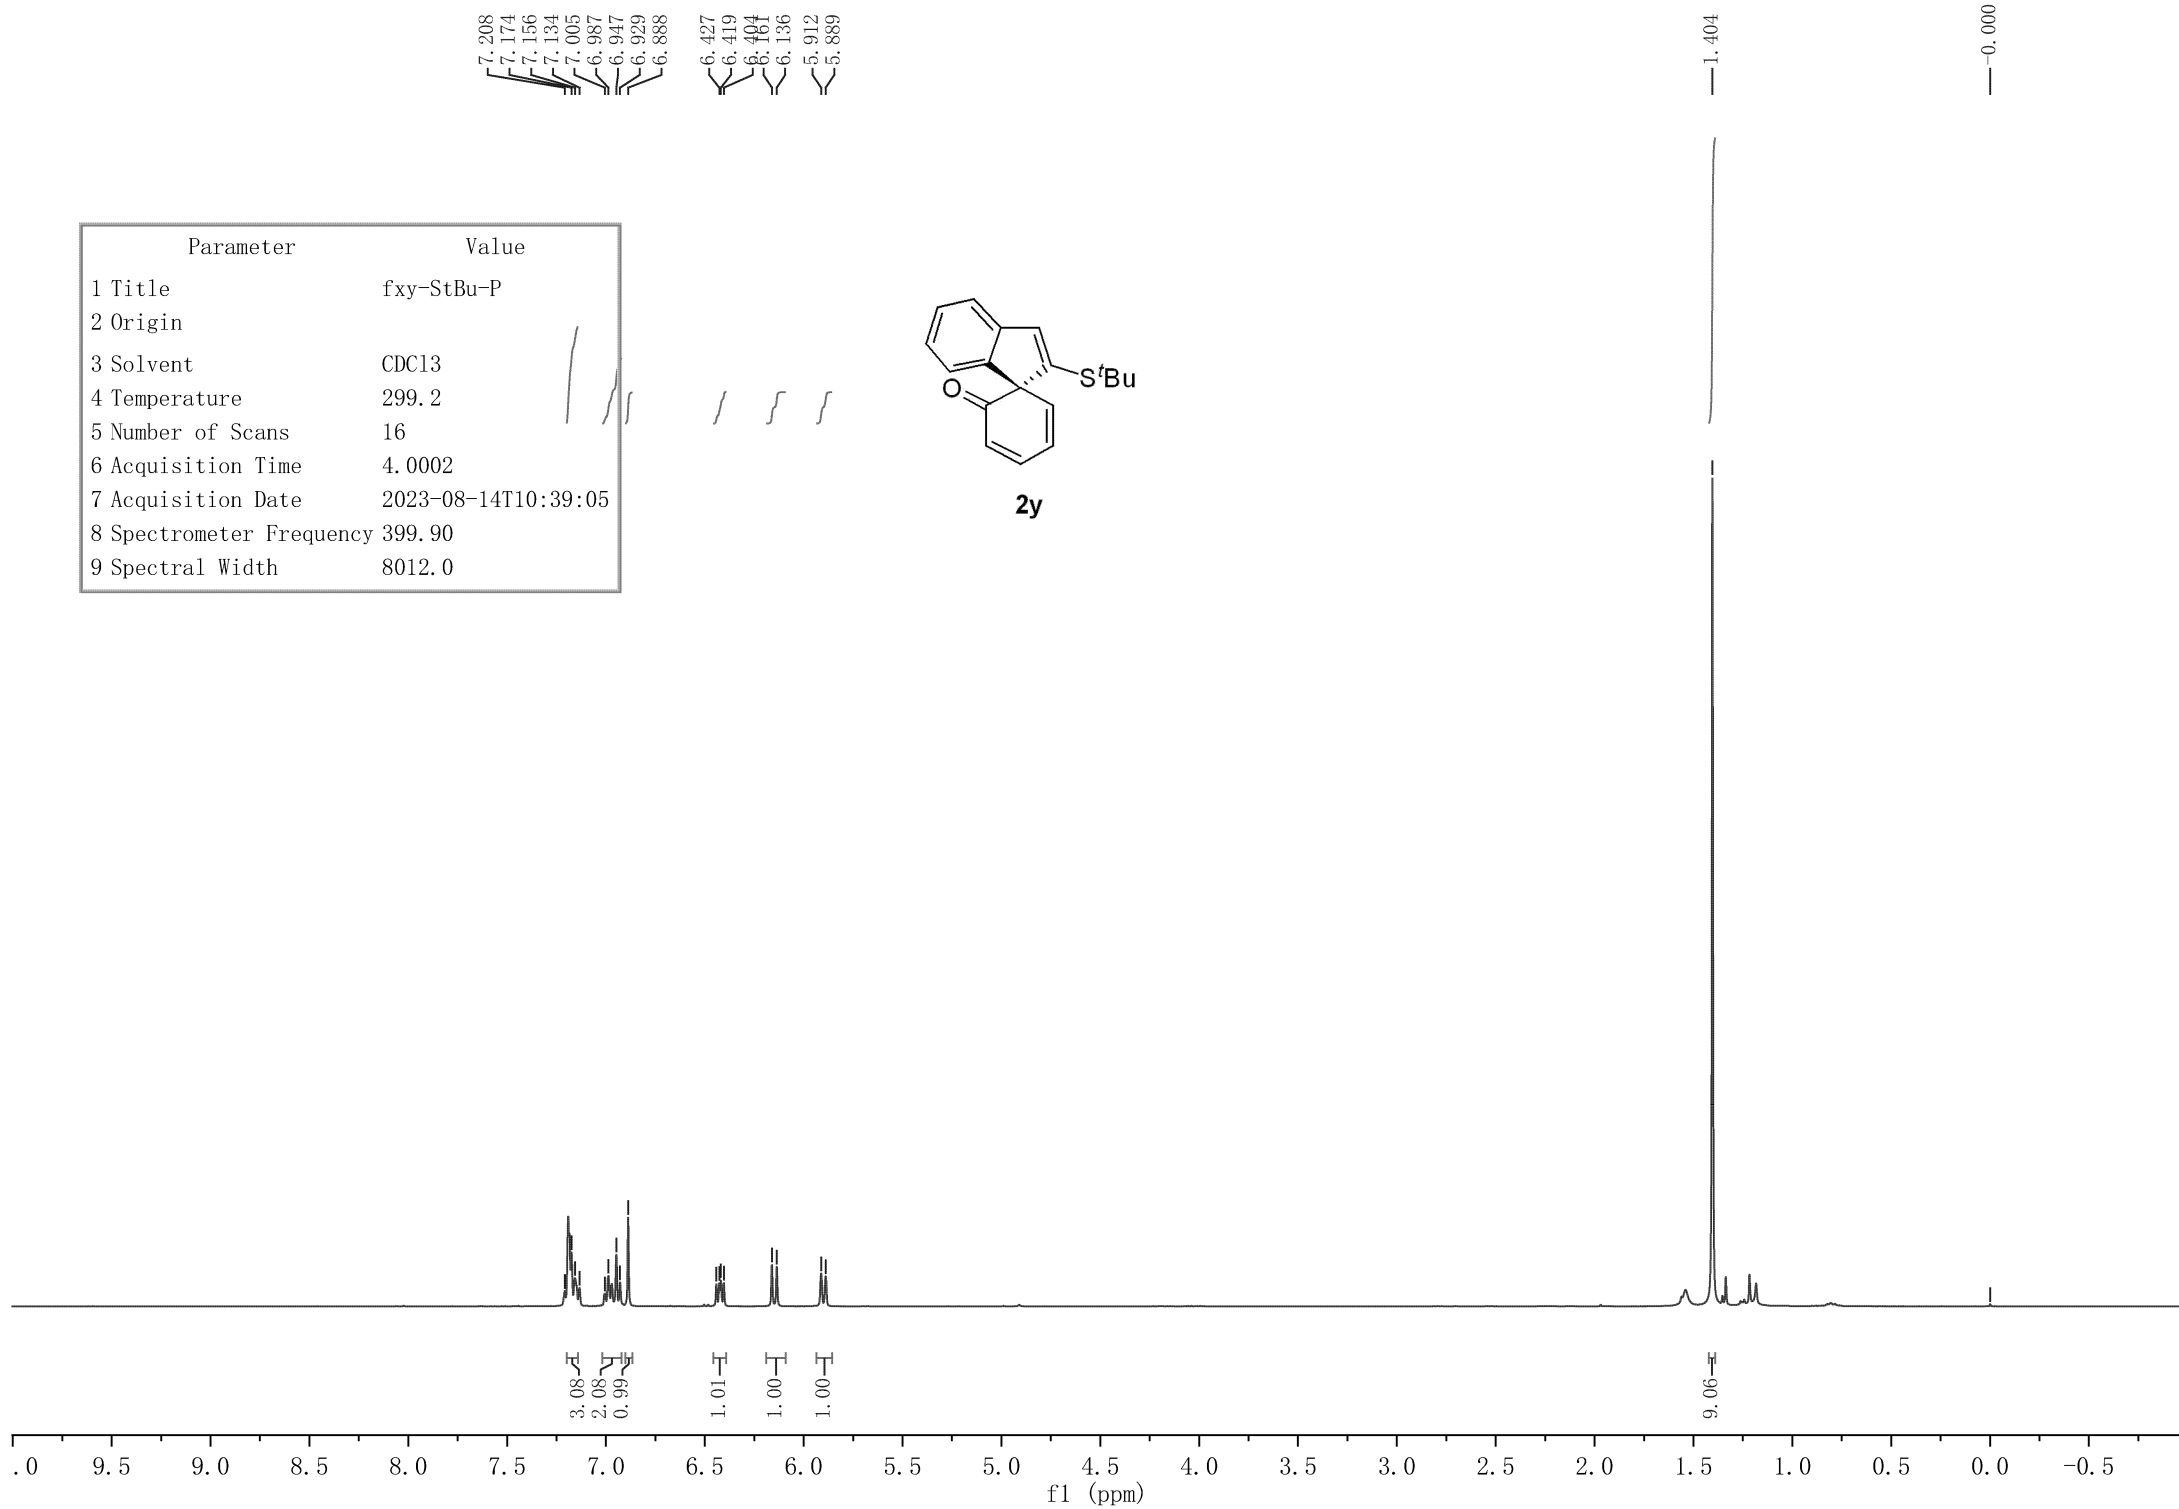

| Parameter                | Value               |
|--------------------------|---------------------|
| 1 Title                  | fxv-StBu-P          |
| 2 Origin                 |                     |
| 3 Solvent                | CDC13               |
| 4 Temperature            | 298.8               |
| 5 Number of Scans        | 200                 |
| 6 Acquisition Time       | 1.0000              |
| 7 Acquisition Date       | 2023-08-14T11:05:16 |
| 8 Spectrometer Frequency | 100.56              |
| 9 Spectral Width         | 26041.0             |

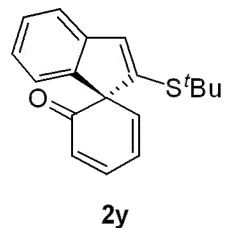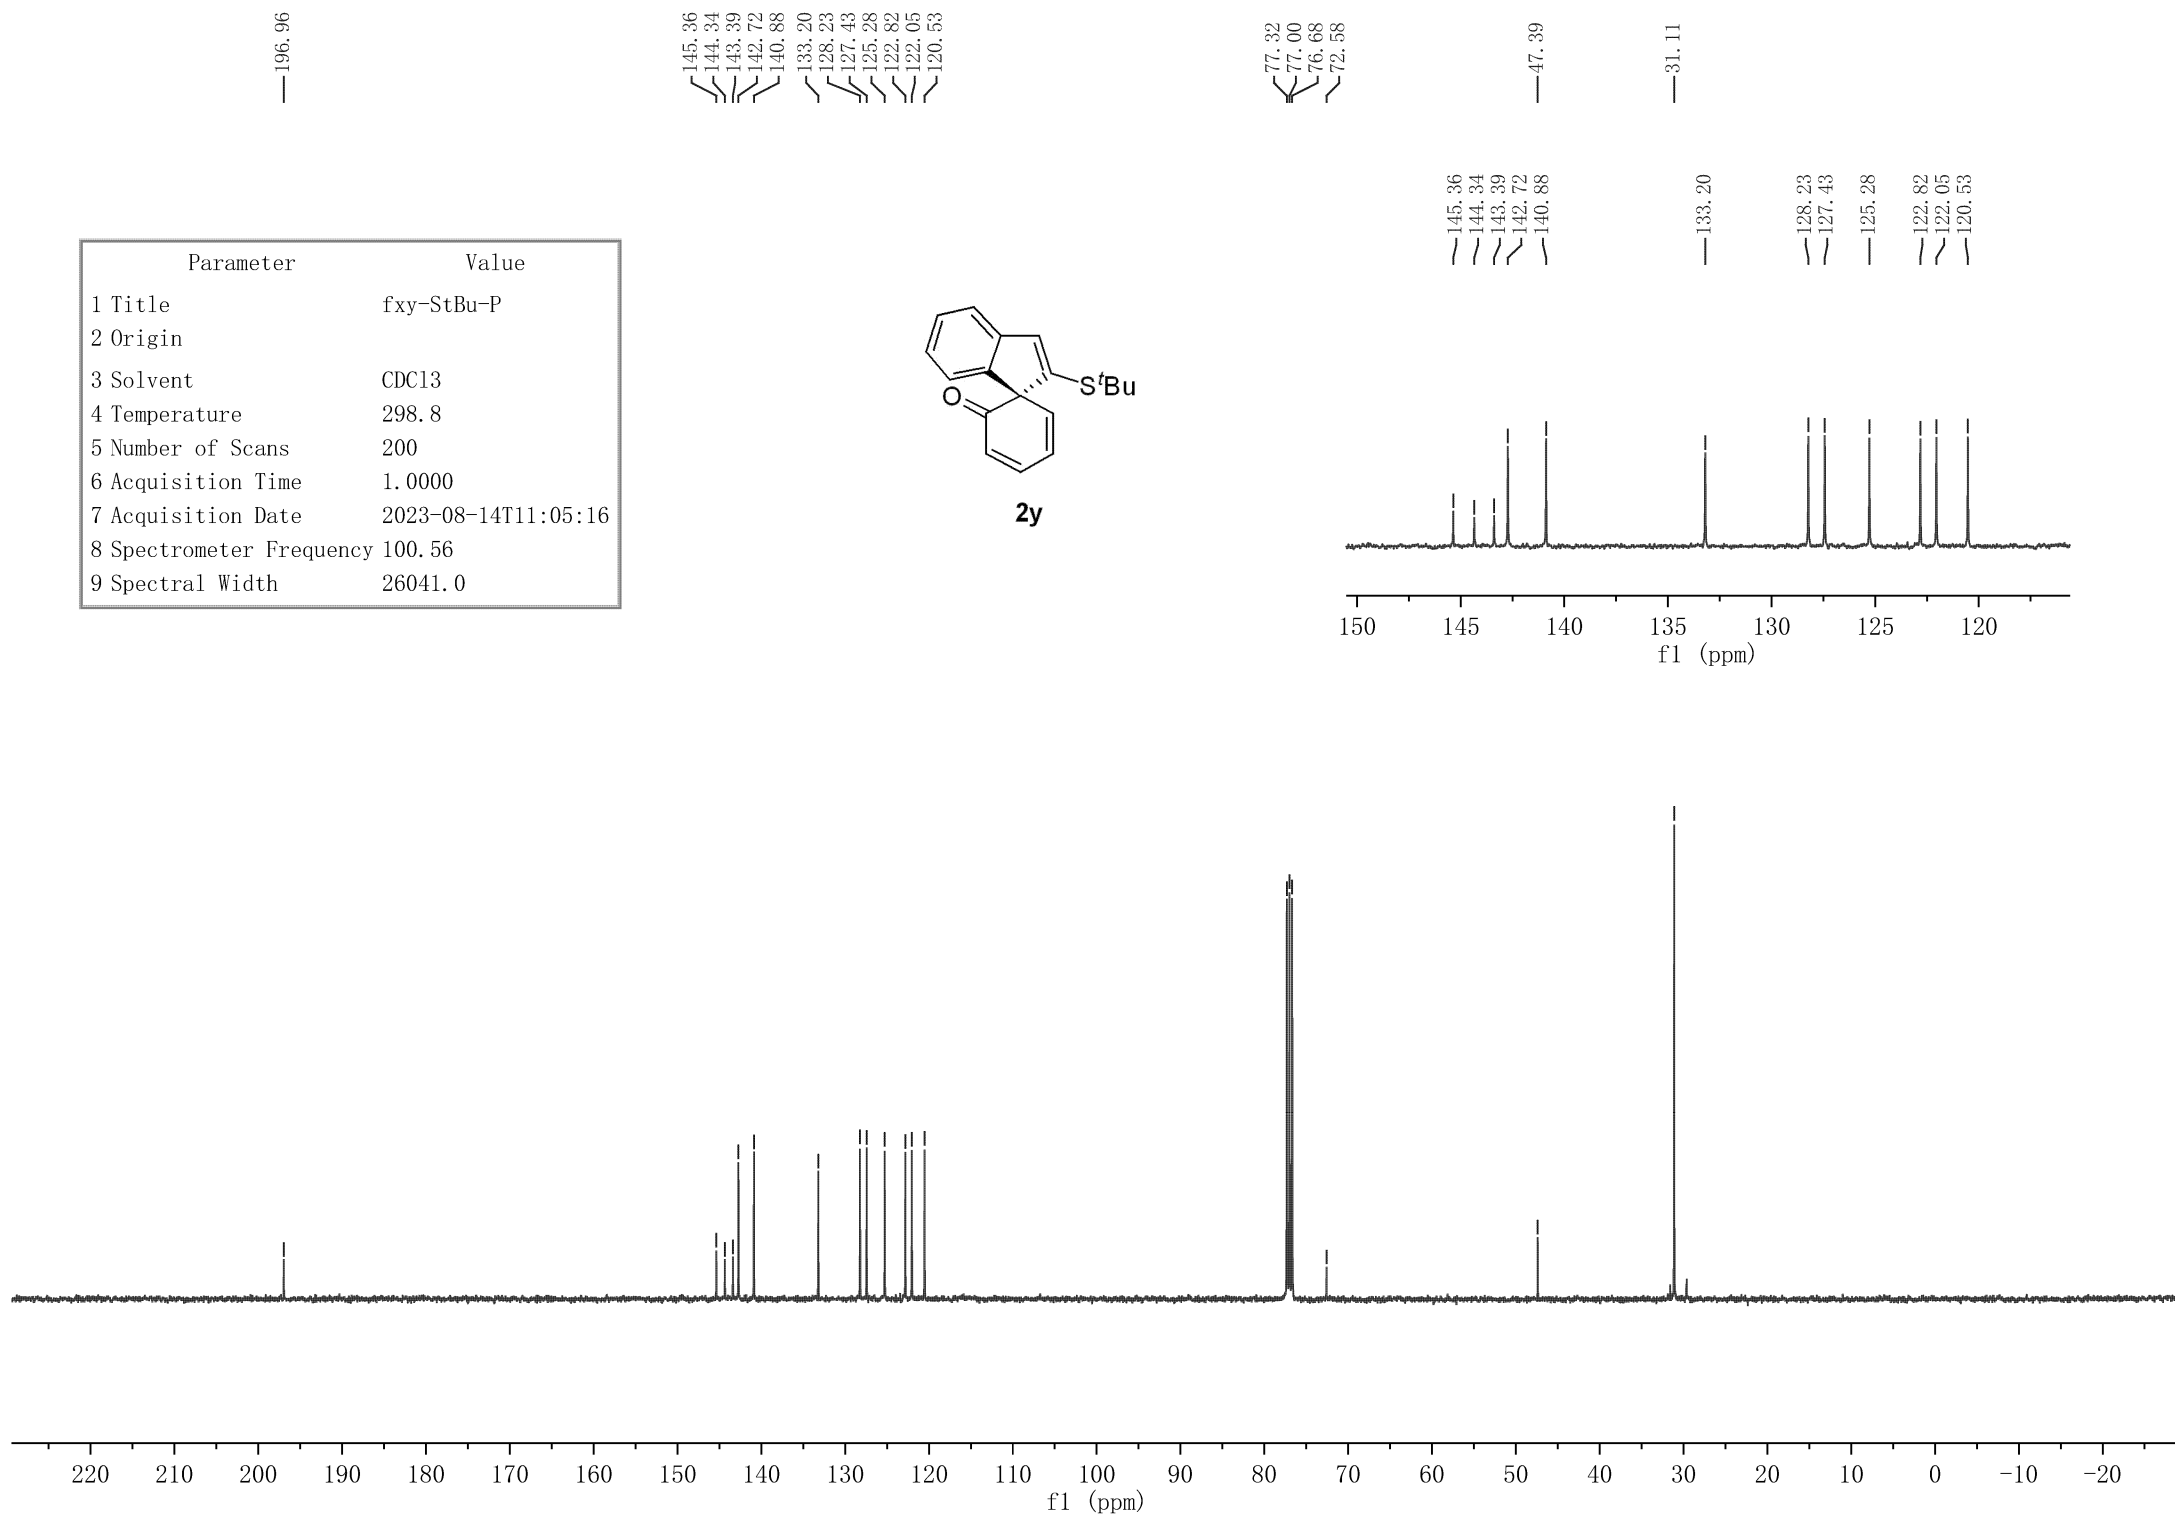

| Parameter                | Value               |
|--------------------------|---------------------|
| 1 Title                  | iPr                 |
| 2 Origin                 |                     |
| 3 Solvent                | CDC13               |
| 4 Temperature            | 299.6               |
| 5 Number of Scans        | 16                  |
| 6 Acquisition Time       | 4.0002              |
| 7 Acquisition Date       | 2023-08-19T02:11:19 |
| 8 Spectrometer Frequency | 399.90              |
| 9 Spectral Width         | 8012.0              |

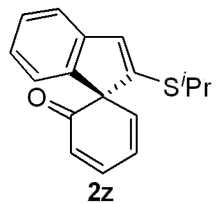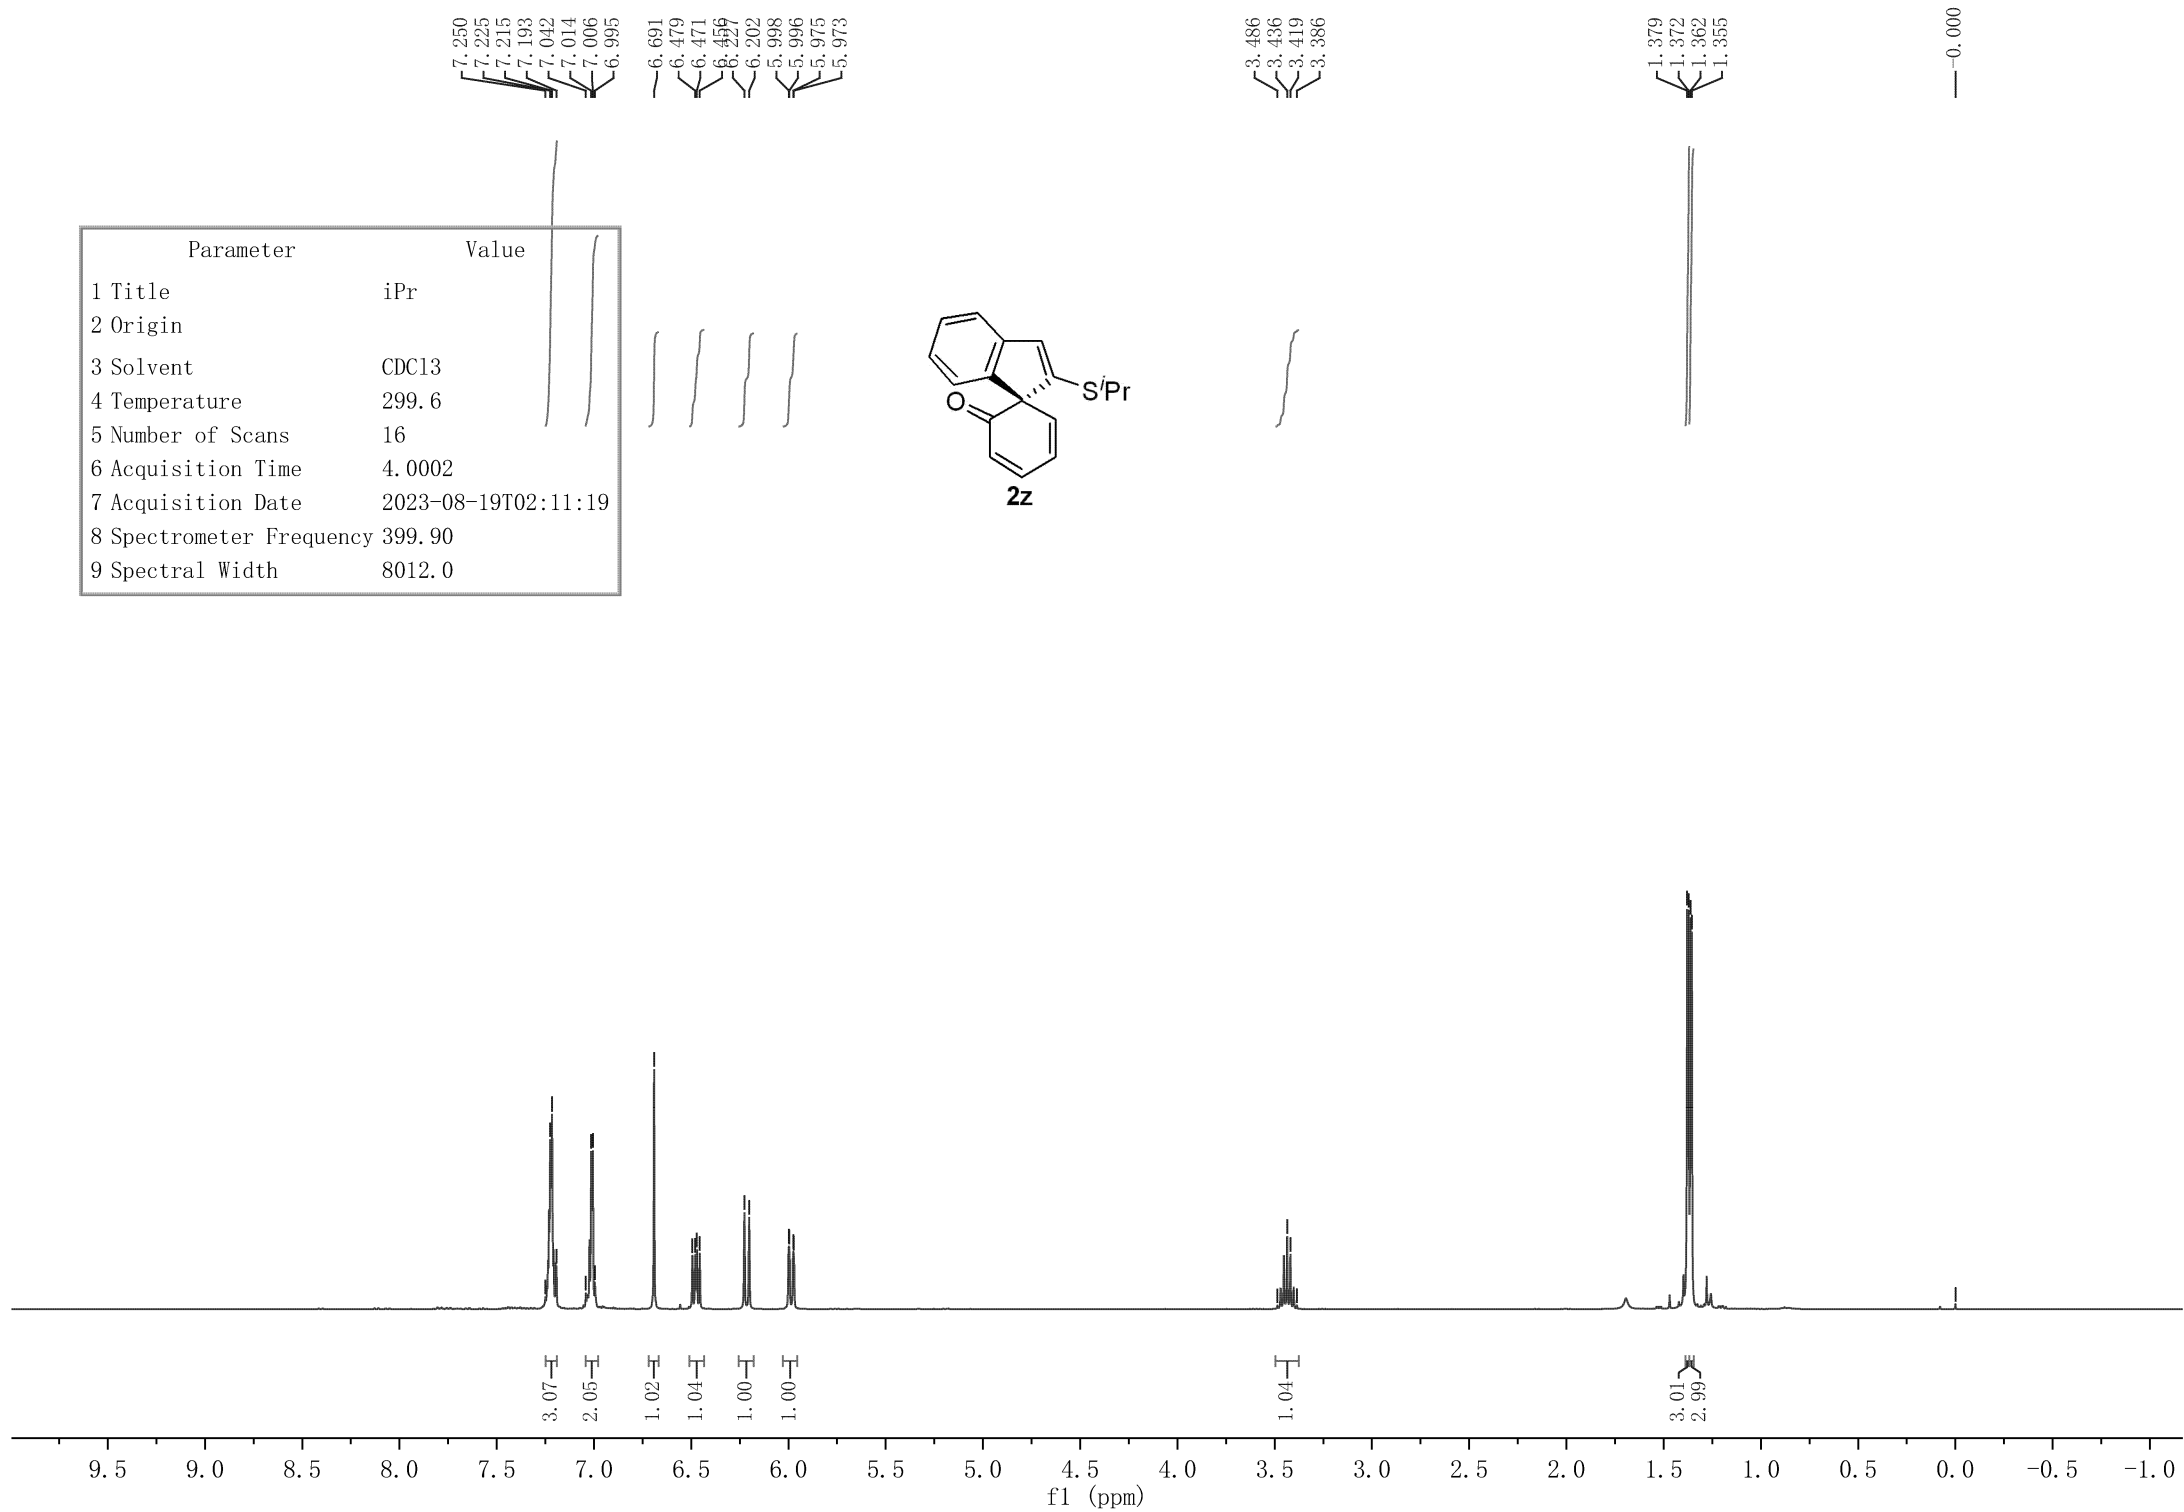

| Parameter                | Value               |
|--------------------------|---------------------|
| 1 Title                  | iPr                 |
| 2 Origin                 |                     |
| 3 Solvent                | CDC13               |
| 4 Temperature            | 299.5               |
| 5 Number of Scans        | 100                 |
| 6 Acquisition Time       | 1.0000              |
| 7 Acquisition Date       | 2023-08-19T02:17:11 |
| 8 Spectrometer Frequency | 100.56              |
| 9 Spectral Width         | 26041.0             |

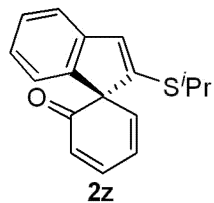

—196.67

146.28  
145.07  
143.22  
142.69  
141.00

128.26  
128.17  
127.15  
124.69  
122.61  
121.81  
120.00

77.32  
77.00  
76.68  
71.33

—36.85

22.80  
22.60

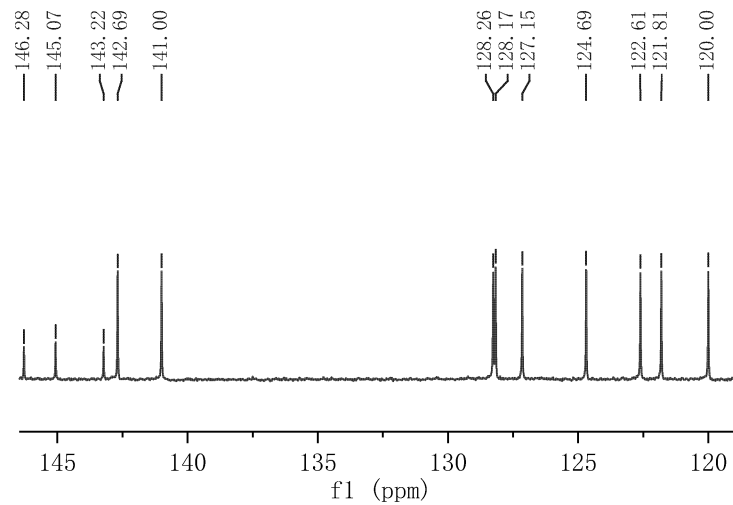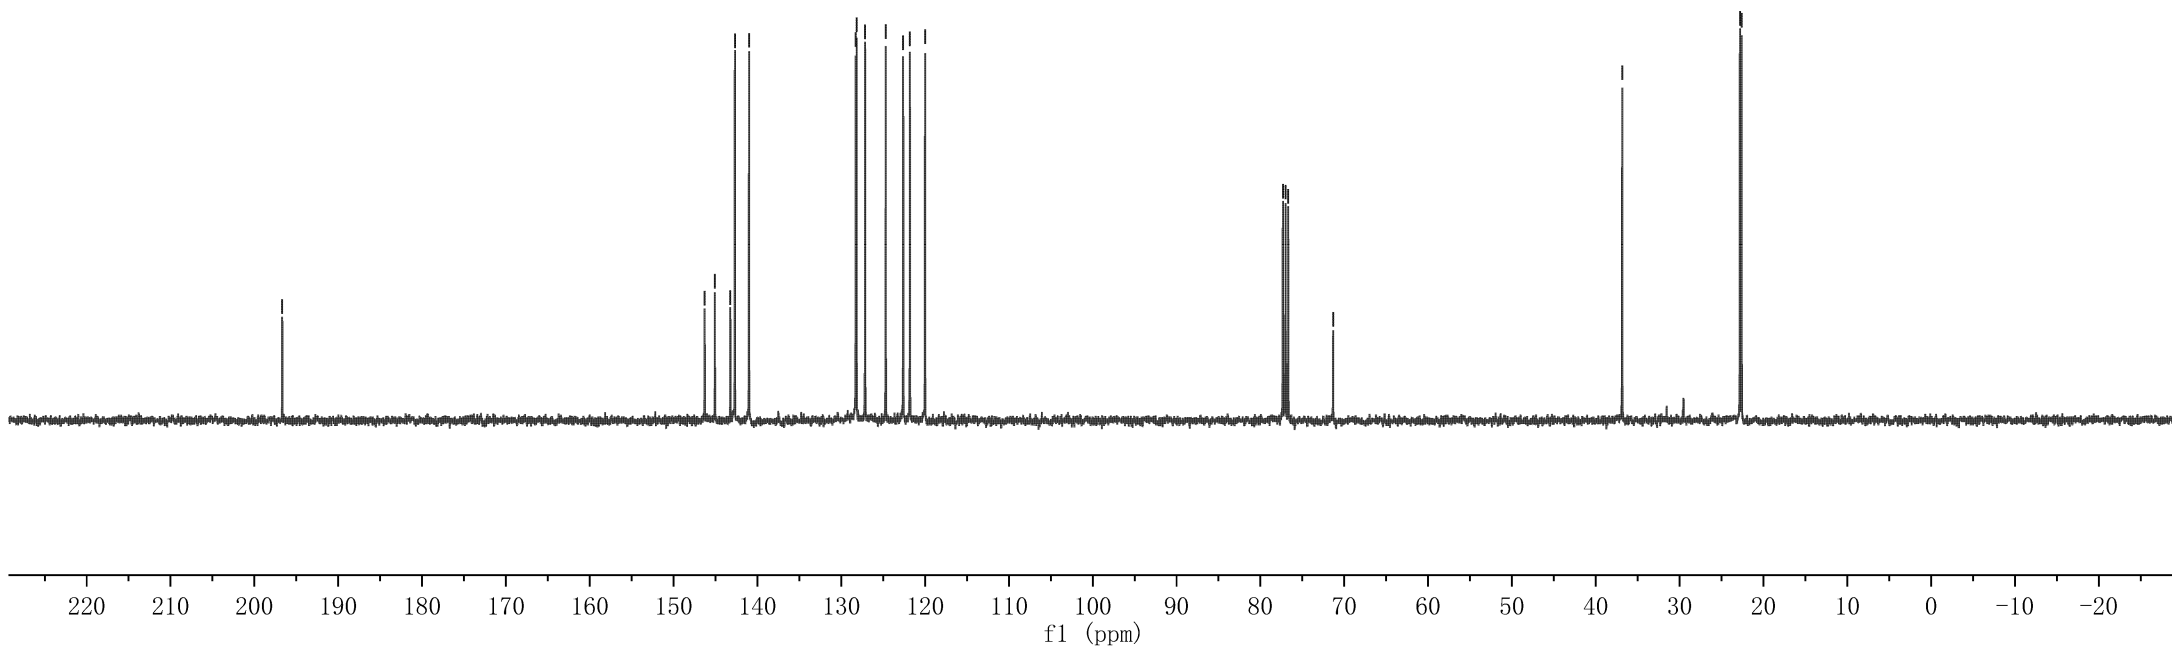



| Parameter                | Value               |
|--------------------------|---------------------|
| 1 Title                  | fxv-2x-SCy          |
| 2 Origin                 |                     |
| 3 Solvent                | CDC13               |
| 4 Temperature            | 300.6               |
| 5 Number of Scans        | 16                  |
| 6 Acquisition Time       | 4.0002              |
| 7 Acquisition Date       | 2023-08-08T23:32:47 |
| 8 Spectrometer Frequency | 399.90              |
| 9 Spectral Width         | 8012.0              |

7.228  
7.219  
7.213  
7.204  
7.019  
7.009  
7.003  
6.992  
6.692  
6.490  
6.482  
6.464  
6.234  
6.210  
6.004  
5.981

3.250  
3.225  
3.217  
3.200

2.110  
2.079  
1.779  
1.768  
1.758  
1.632  
1.446  
1.388  
1.314

— 0.000

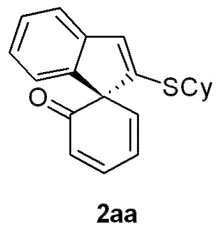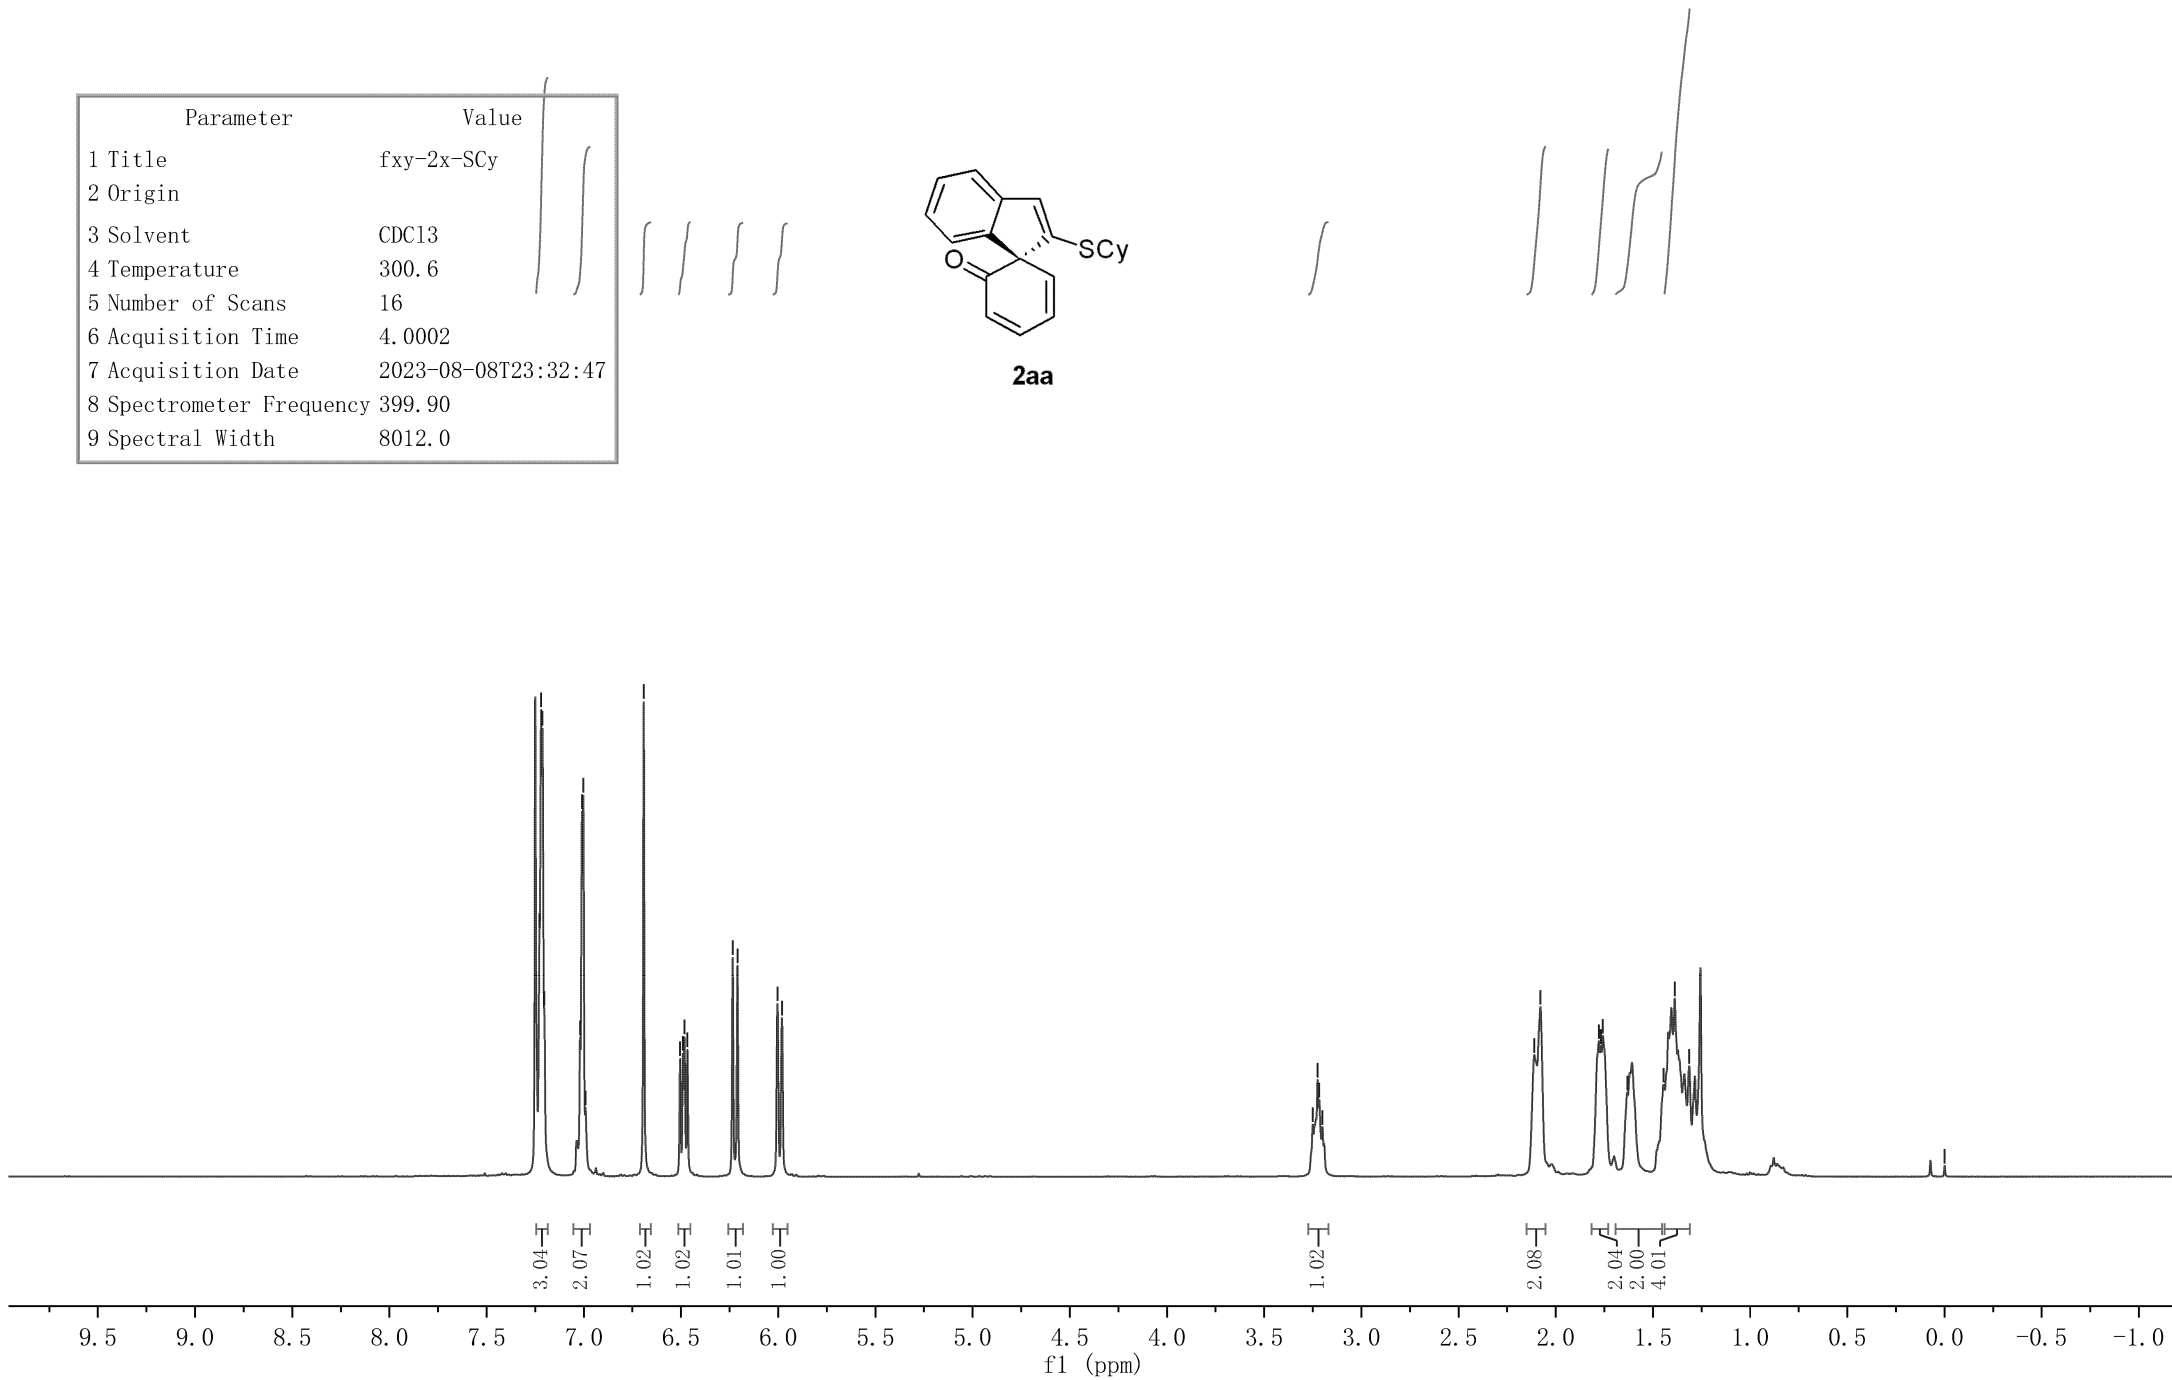

| Parameter                | Value               |
|--------------------------|---------------------|
| 1 Title                  | fxy-2x-SCy          |
| 2 Origin                 |                     |
| 3 Solvent                | CDC13               |
| 4 Temperature            | 300.8               |
| 5 Number of Scans        | 200                 |
| 6 Acquisition Time       | 1.0000              |
| 7 Acquisition Date       | 2023-08-08T23:51:58 |
| 8 Spectrometer Frequency | 100.56              |
| 9 Spectral Width         | 26041.0             |



196.71

146.09  
145.17  
143.26  
142.65  
141.11

128.21  
128.09  
127.26  
124.68  
122.65  
121.85  
119.99

77.32  
77.00  
76.68  
71.46

45.30

32.99  
32.72  
25.84  
25.69

146.09  
145.17  
143.26  
142.65  
141.11

128.21  
128.09  
127.26  
124.68  
122.65  
121.85  
119.99

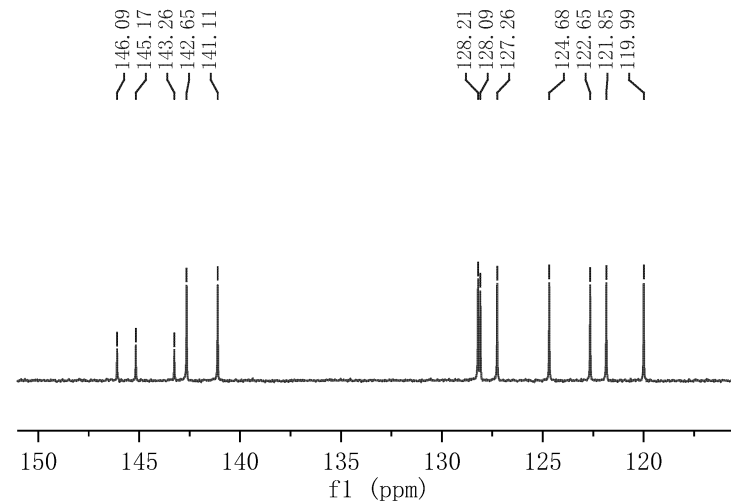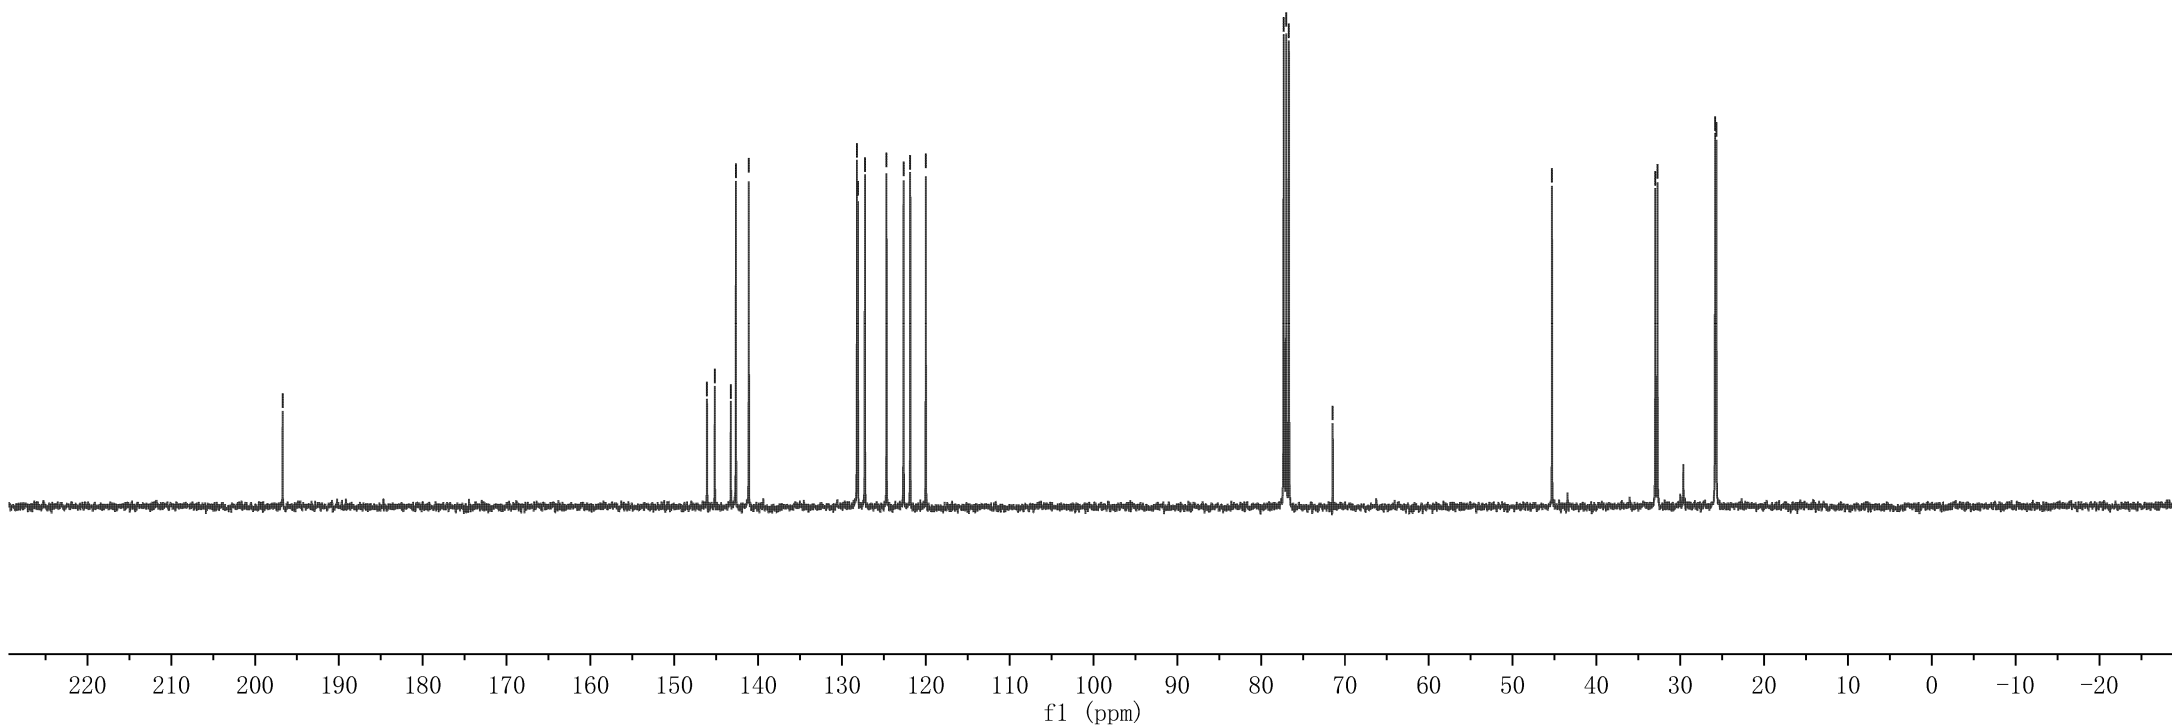

7.305  
7.286  
7.253  
7.235  
7.216  
7.195  
7.174  
7.136  
7.118  
6.978  
6.959  
6.946  
6.933  
6.601  
6.429  
6.414  
6.406  
6.391  
6.174  
6.150  
5.936  
5.913

4.096  
4.064  
4.054  
4.023

0.000

| Parameter                | Value               |
|--------------------------|---------------------|
| 1 Title                  | fxv-SBn-P           |
| 2 Origin                 |                     |
| 3 Solvent                | CDC13               |
| 4 Temperature            | 299.0               |
| 5 Number of Scans        | 16                  |
| 6 Acquisition Time       | 4.0002              |
| 7 Acquisition Date       | 2023-08-14T11:10:41 |
| 8 Spectrometer Frequency | 399.90              |
| 9 Spectral Width         | 8012.0              |

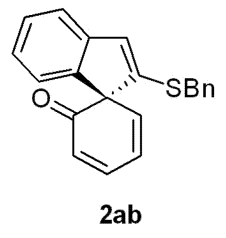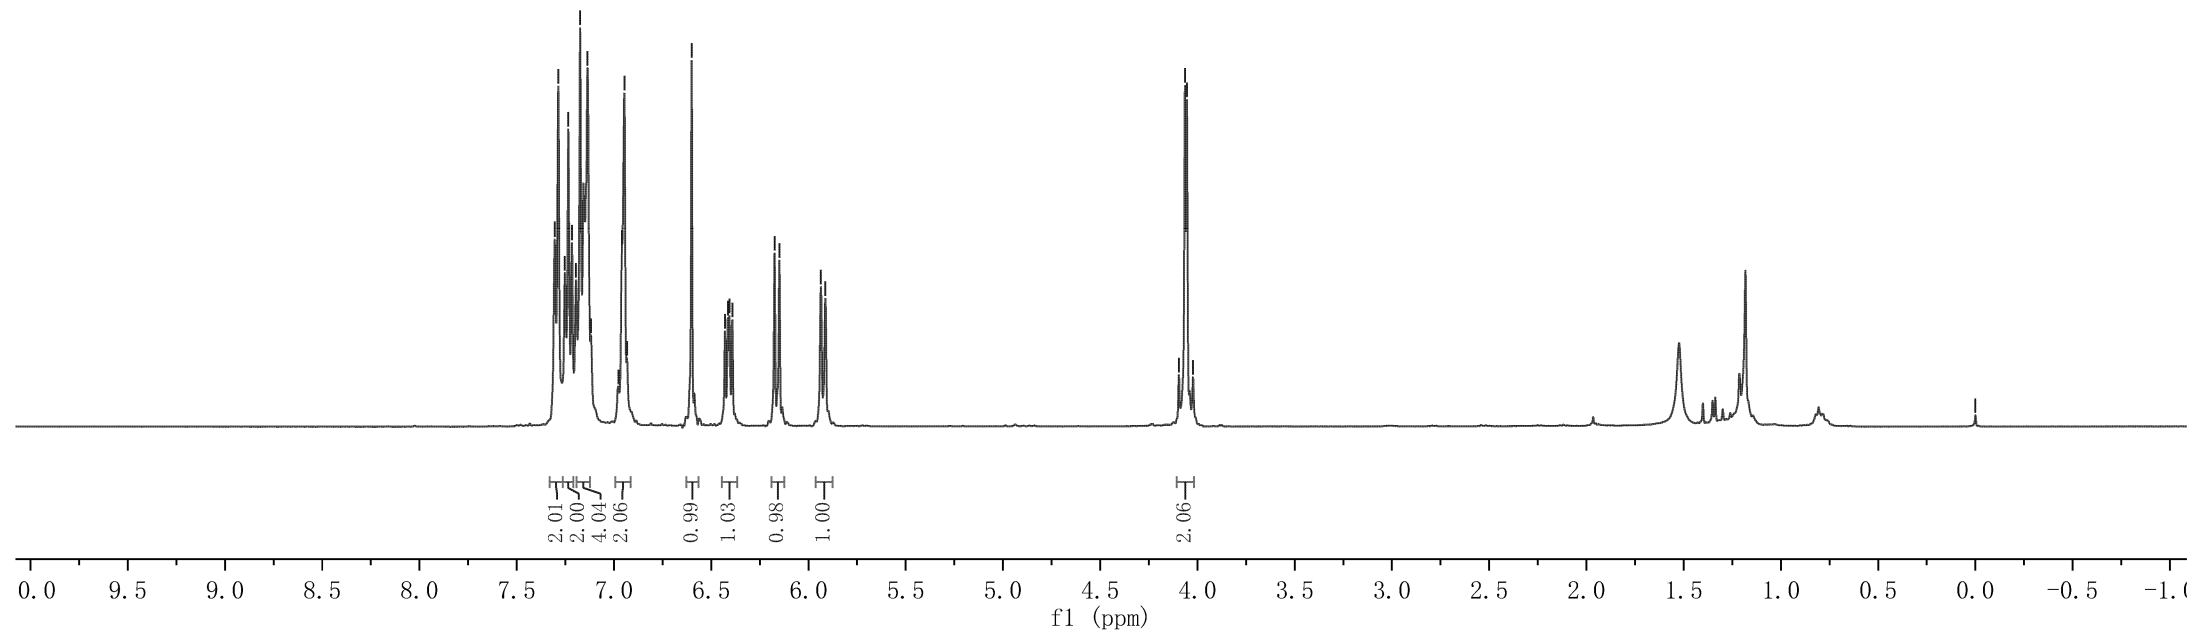

| Parameter                | Value               |
|--------------------------|---------------------|
| 1 Title                  | fxv-SBn-P           |
| 2 Origin                 |                     |
| 3 Solvent                | CDC13               |
| 4 Temperature            | 299.0               |
| 5 Number of Scans        | 16                  |
| 6 Acquisition Time       | 4.0002              |
| 7 Acquisition Date       | 2023-08-14T11:10:41 |
| 8 Spectrometer Frequency | 399.90              |
| 9 Spectral Width         | 8012.0              |

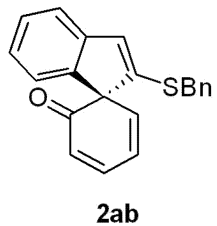

146.64  
144.91  
143.22  
142.78  
140.97  
135.87  
128.86  
128.61  
128.29  
128.04  
127.51  
127.24  
124.92  
122.77  
121.87  
120.23

77.32  
77.00  
76.68  
71.28

37.47

146.64  
144.91  
143.22  
142.78  
140.97

135.87

128.86  
128.61  
128.29  
128.04  
127.51  
127.24  
124.92  
122.77  
121.87  
120.23

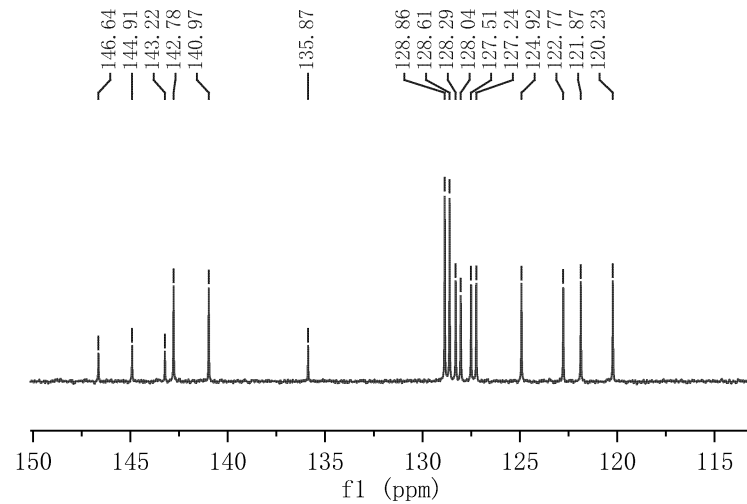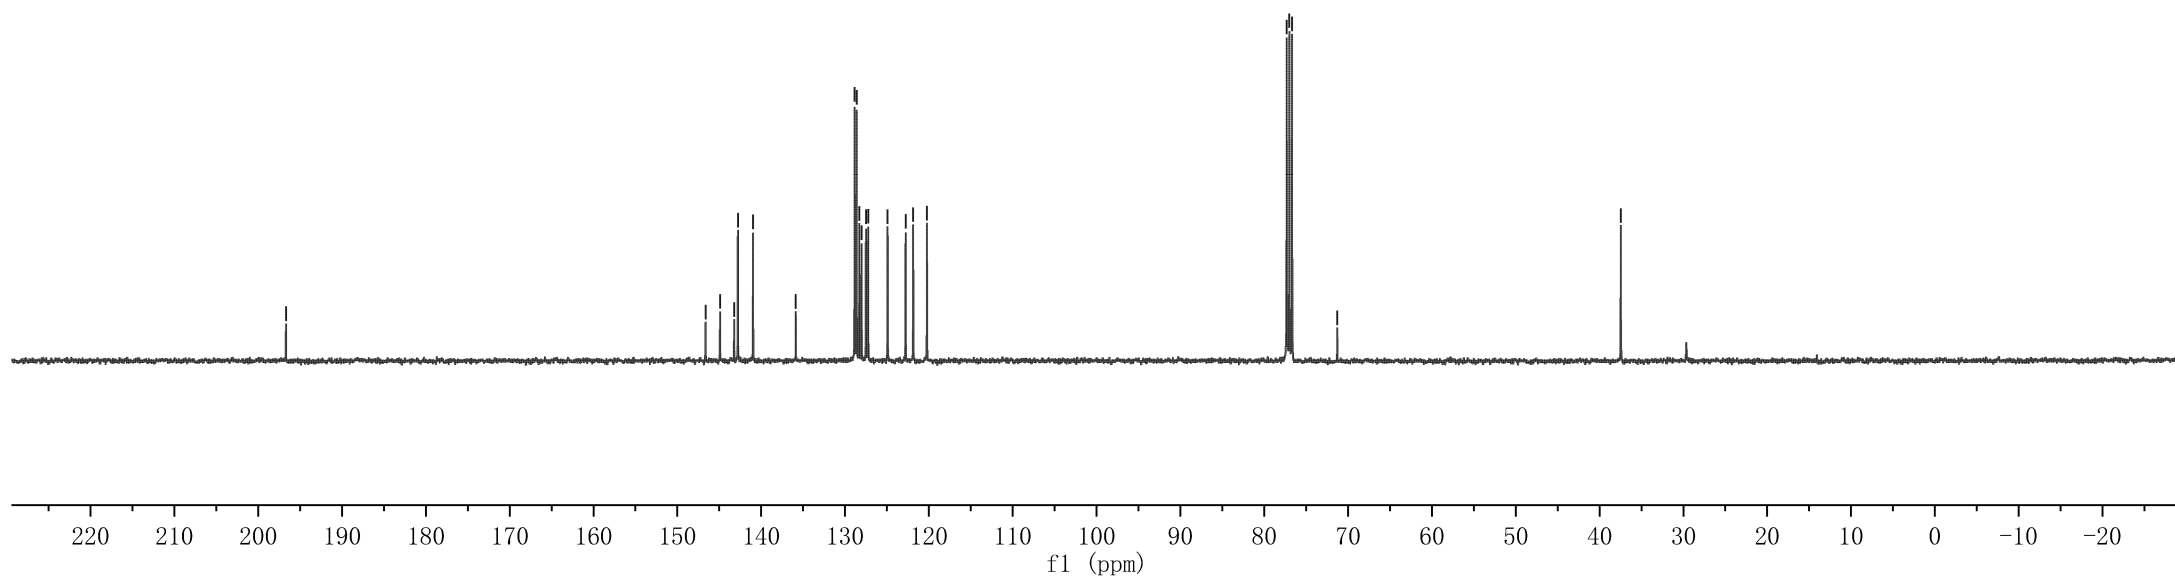

| Parameter                | Value               |
|--------------------------|---------------------|
| 1 Title                  | fxv-2aa-SPh         |
| 2 Origin                 |                     |
| 3 Solvent                | CDC13               |
| 4 Temperature            | 300.8               |
| 5 Number of Scans        | 16                  |
| 6 Acquisition Time       | 4.0002              |
| 7 Acquisition Date       | 2023-08-08T23:57:18 |
| 8 Spectrometer Frequency | 399.90              |
| 9 Spectral Width         | 8012.0              |

7.561  
7.557  
7.548  
7.540  
7.344  
7.338  
7.330  
7.229  
7.210  
7.163  
7.145  
7.058  
7.039  
7.019  
6.999  
6.569  
6.444  
6.429  
6.421  
6.406  
6.210  
6.185  
6.007  
5.984

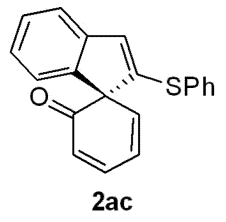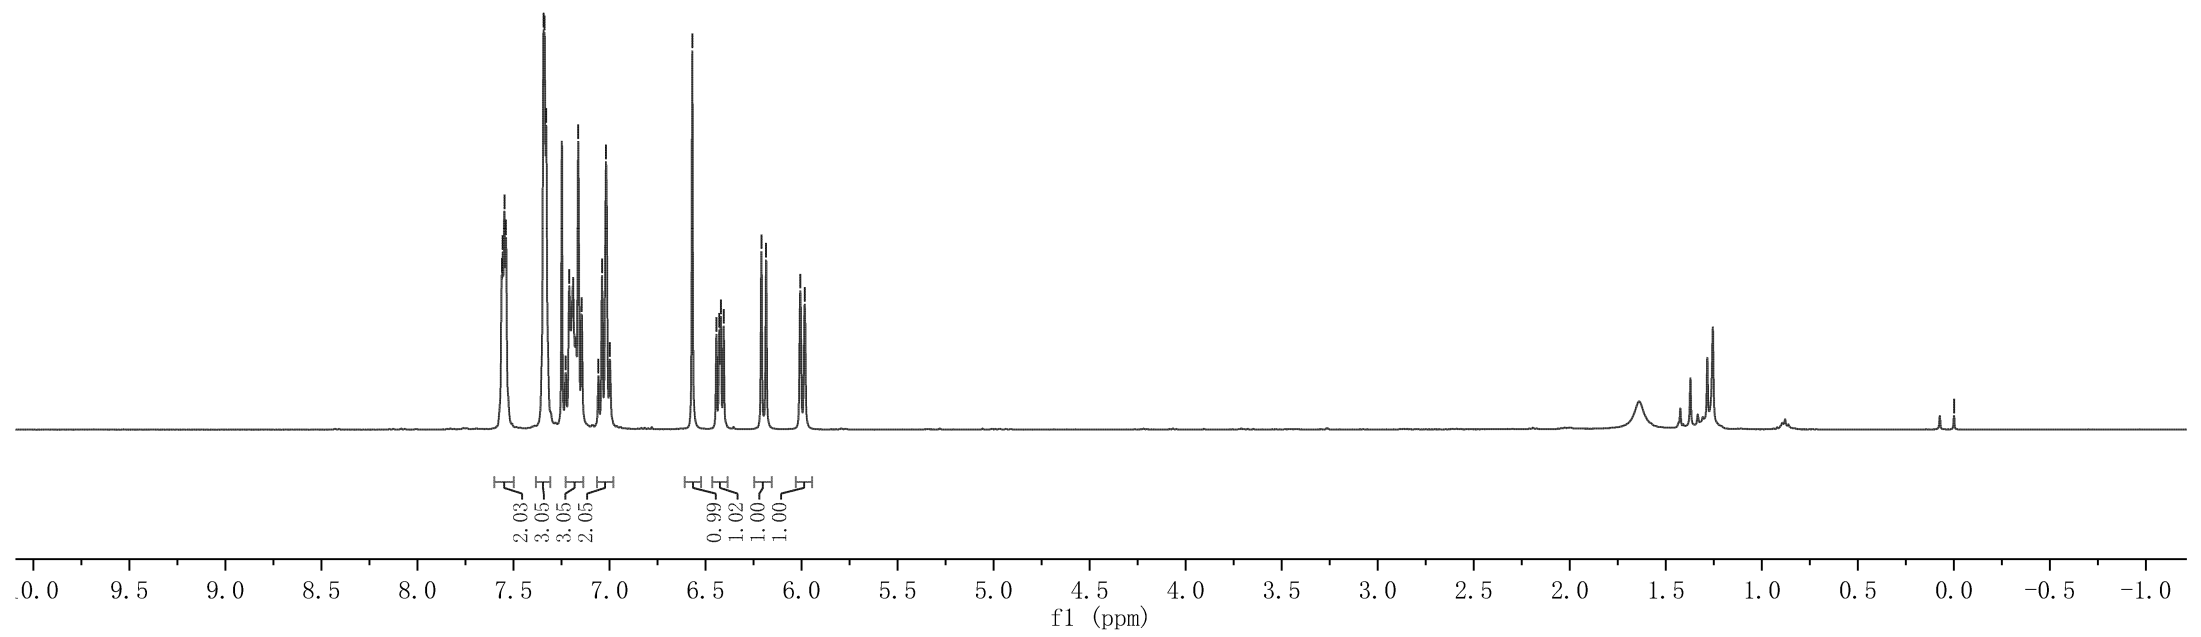

— 0.000

| Parameter                | Value               |
|--------------------------|---------------------|
| 1 Title                  | fxy-2aa-SPh         |
| 2 Origin                 |                     |
| 3 Solvent                | CDC13               |
| 4 Temperature            | 300.8               |
| 5 Number of Scans        | 1024                |
| 6 Acquisition Time       | 1.0000              |
| 7 Acquisition Date       | 2023-08-09T00:34:04 |
| 8 Spectrometer Frequency | 100.56              |
| 9 Spectral Width         | 26041.0             |

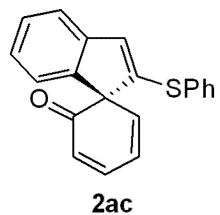

196.42

146.85  
144.54  
143.90  
142.60  
140.47  
134.07  
131.71  
131.47  
129.22  
128.71  
128.26  
127.36  
125.23  
122.71  
121.96  
120.66

77.32  
77.00  
76.68  
71.16

146.85  
144.54  
143.90  
142.60  
140.47  
134.07  
131.71  
131.47  
129.22  
128.71  
128.26  
127.36  
125.23  
122.71  
121.96  
120.66

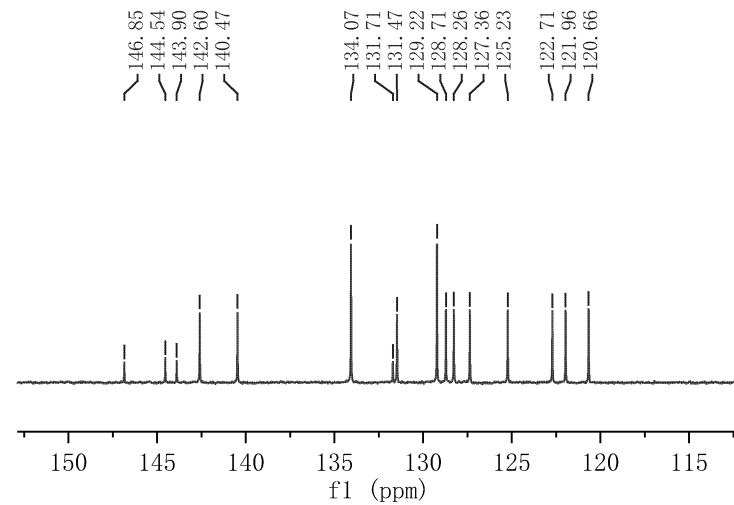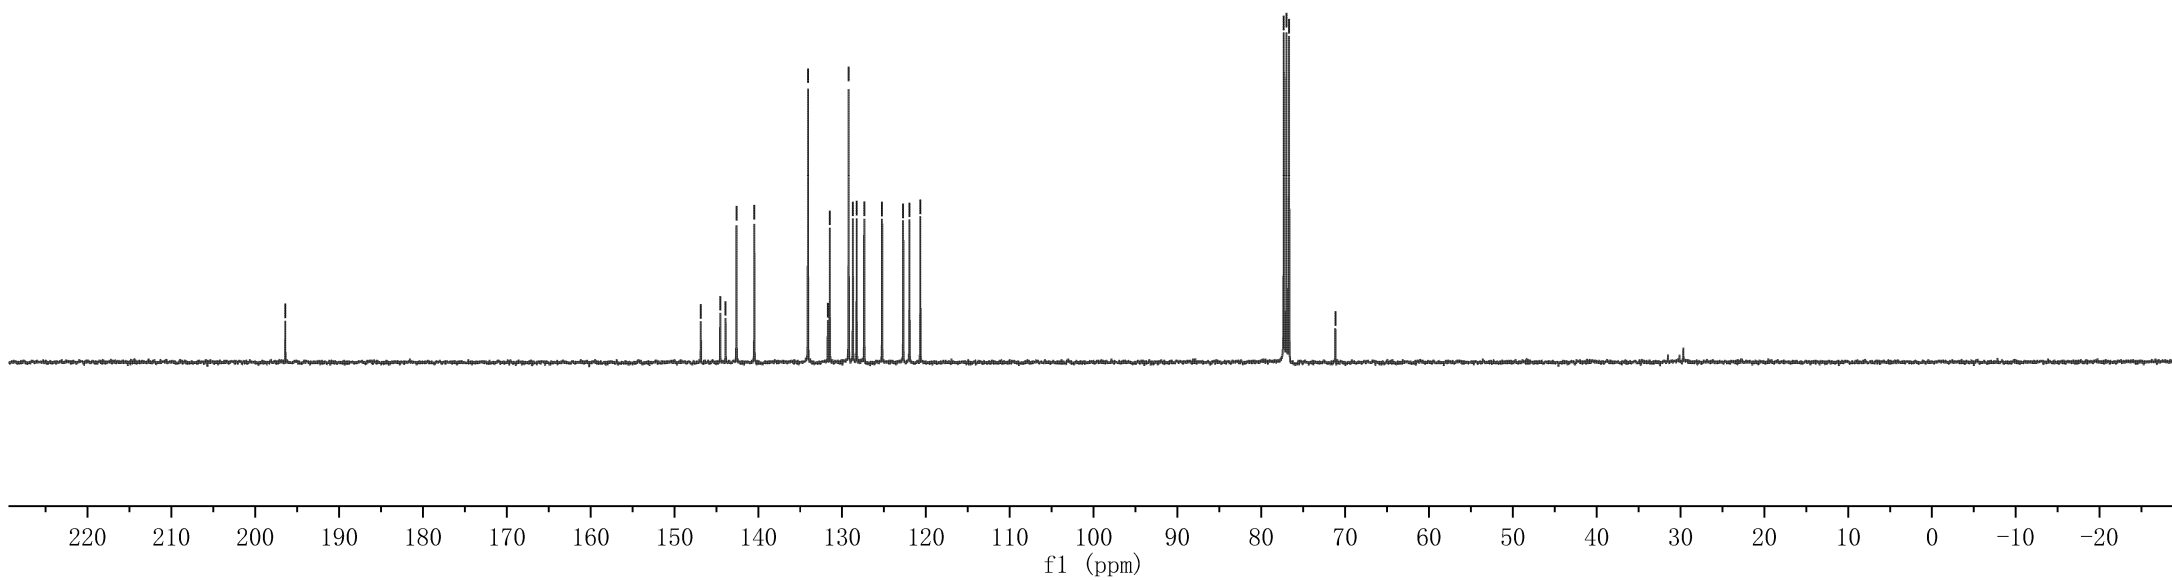

| Parameter                | Value               |
|--------------------------|---------------------|
| 1 Title                  | FXY-13-36           |
| 2 Origin                 |                     |
| 3 Solvent                | CDC13               |
| 4 Temperature            | 299.9               |
| 5 Number of Scans        | 16                  |
| 6 Acquisition Time       | 4.0002              |
| 7 Acquisition Date       | 2023-07-01T11:38:47 |
| 8 Spectrometer Frequency | 399.90              |
| 9 Spectral Width         | 8012.0              |

7.345  
7.326  
7.221  
7.204  
7.188  
7.117  
7.113  
7.099  
6.768  
6.220  
6.207  
6.197  
6.184  
6.071  
6.047  
6.034  
5.986  
5.978  
5.961  
5.954  
5.954  
5.327

4.714

2.116  
2.082

1.719

0.000

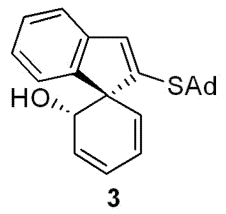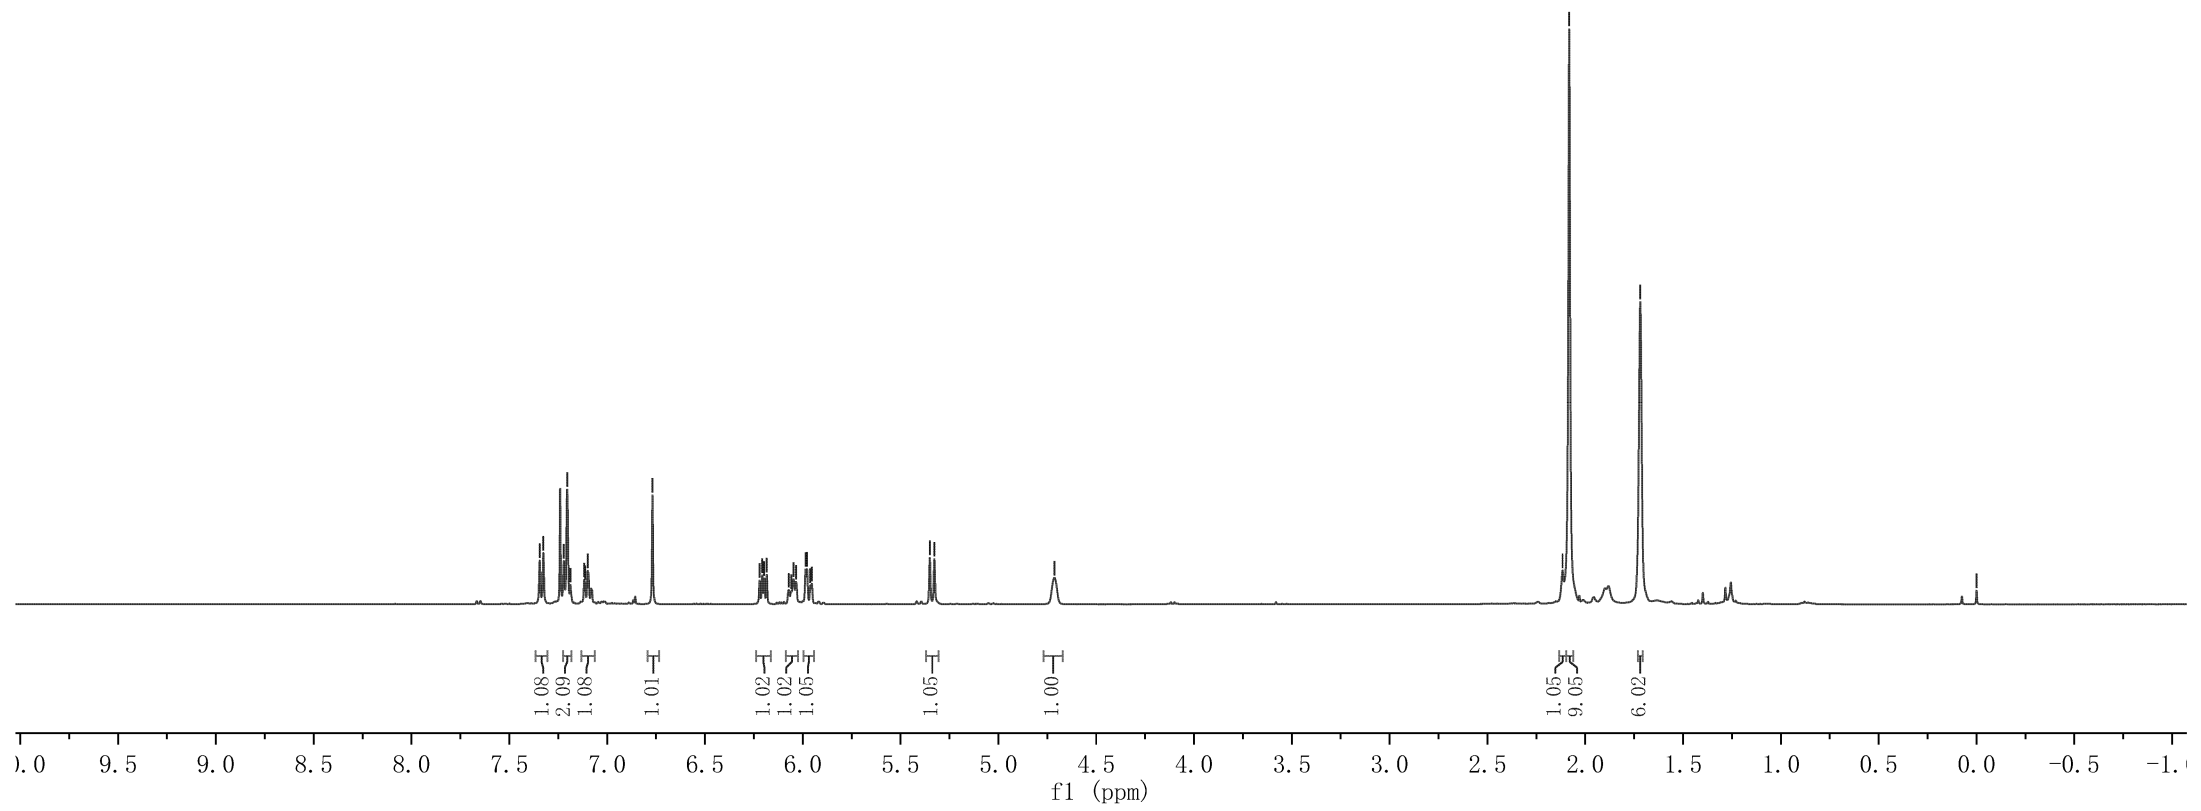

| Parameter                | Value               |
|--------------------------|---------------------|
| 1 Title                  | fxv-13-28-c         |
| 2 Origin                 | Bruker BioSpin GmbH |
| 3 Solvent                | CDC13               |
| 4 Temperature            | 300.0               |
| 5 Number of Scans        | 28                  |
| 6 Acquisition Time       | 1.3631              |
| 7 Acquisition Date       | 2023-06-29T17:08:48 |
| 8 Spectrometer Frequency | 100.61              |
| 9 Spectral Width         | 24038.5             |

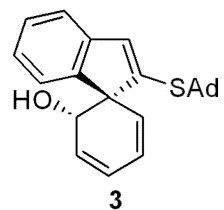

149.21  
143.80  
143.77  
131.00  
129.81  
129.33  
127.56  
125.01  
124.79  
124.12  
122.48  
119.62

77.32  
77.00  
76.68  
72.30  
63.04  
49.55  
43.34  
36.24  
29.98

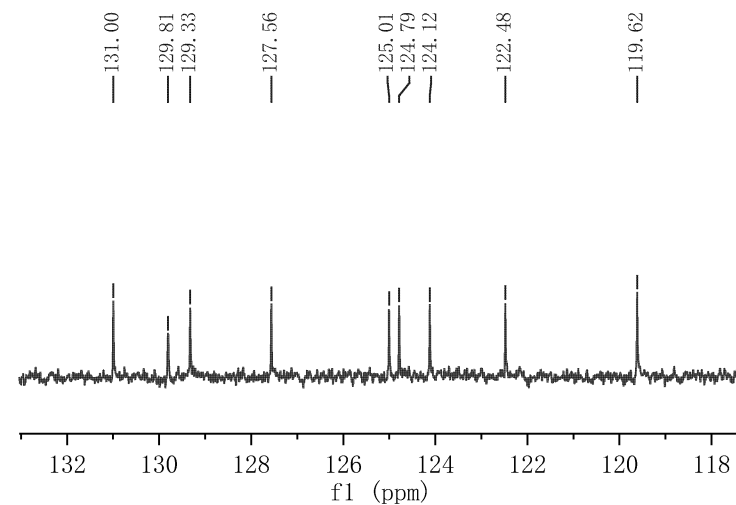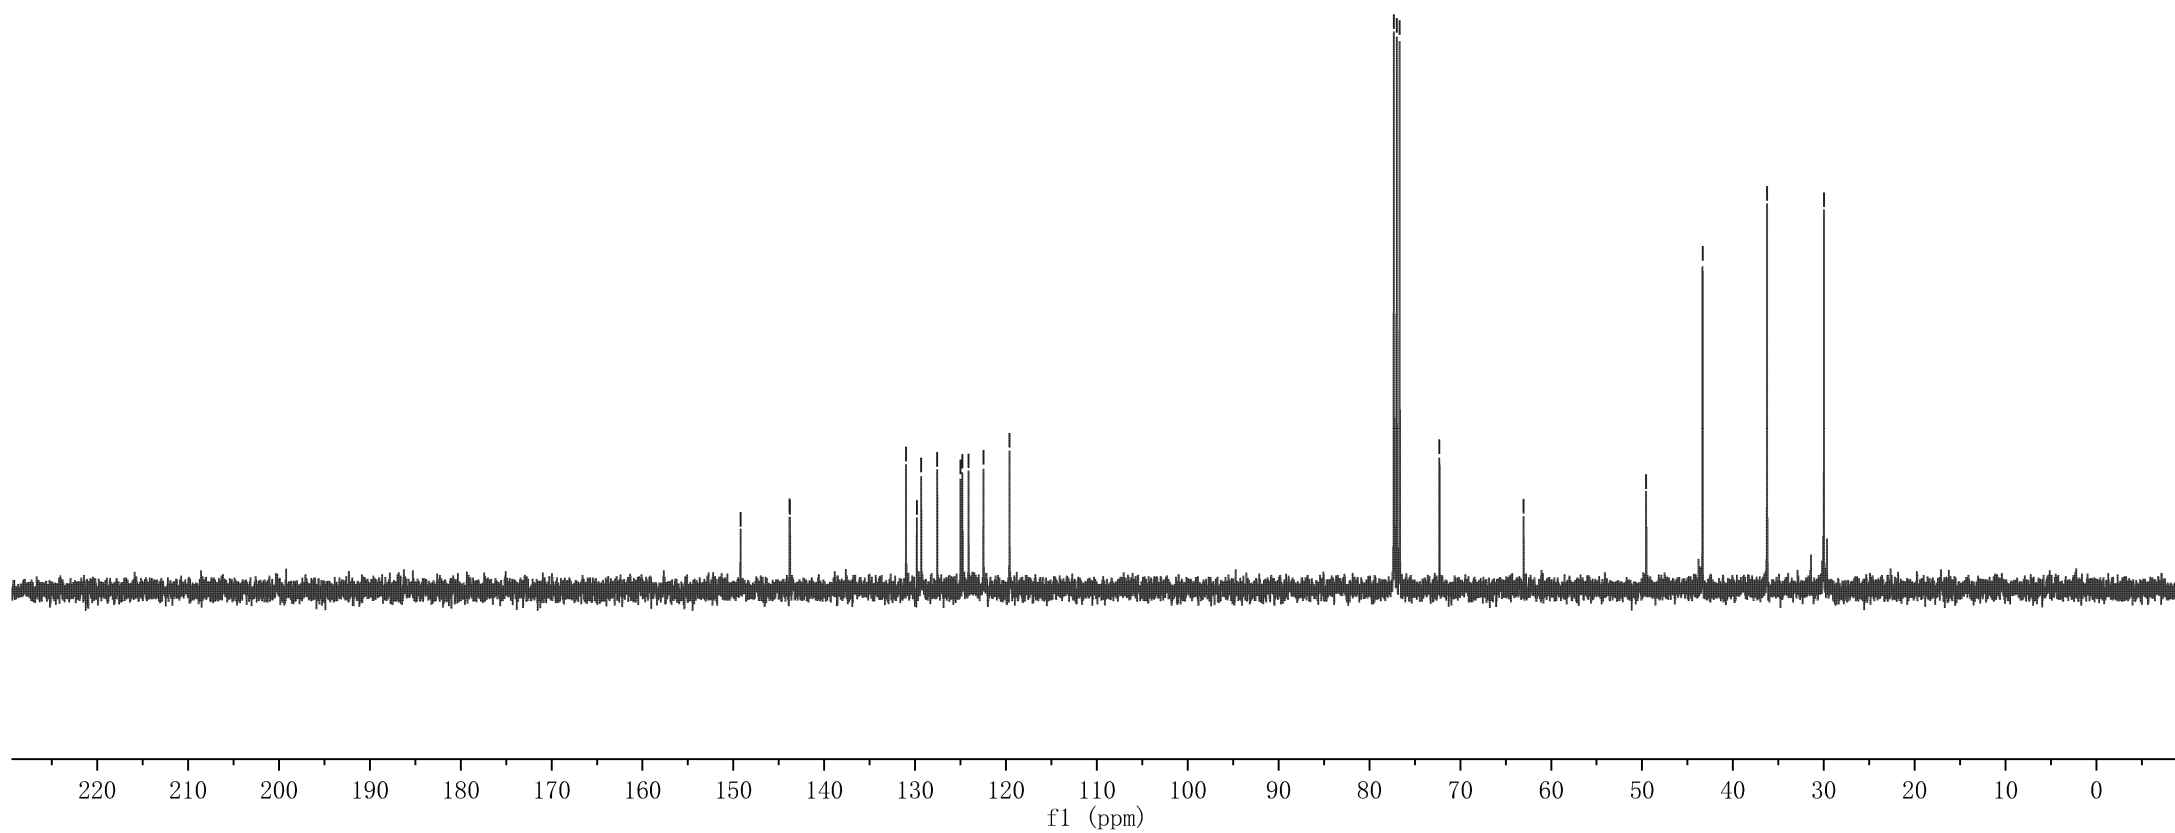



| Parameter                | Value               |
|--------------------------|---------------------|
| 1 Title                  | fxv-13-28-dept      |
| 2 Origin                 | Bruker BioSpin GmbH |
| 3 Solvent                | CDC13               |
| 4 Temperature            | 300.0               |
| 5 Number of Scans        | 6                   |
| 6 Acquisition Time       | 1.3631              |
| 7 Acquisition Date       | 2023-06-29T17:10:58 |
| 8 Spectrometer Frequency | 100.61              |
| 9 Spectral Width         | 24038.5             |

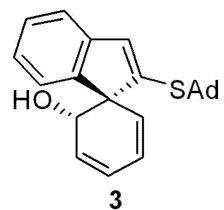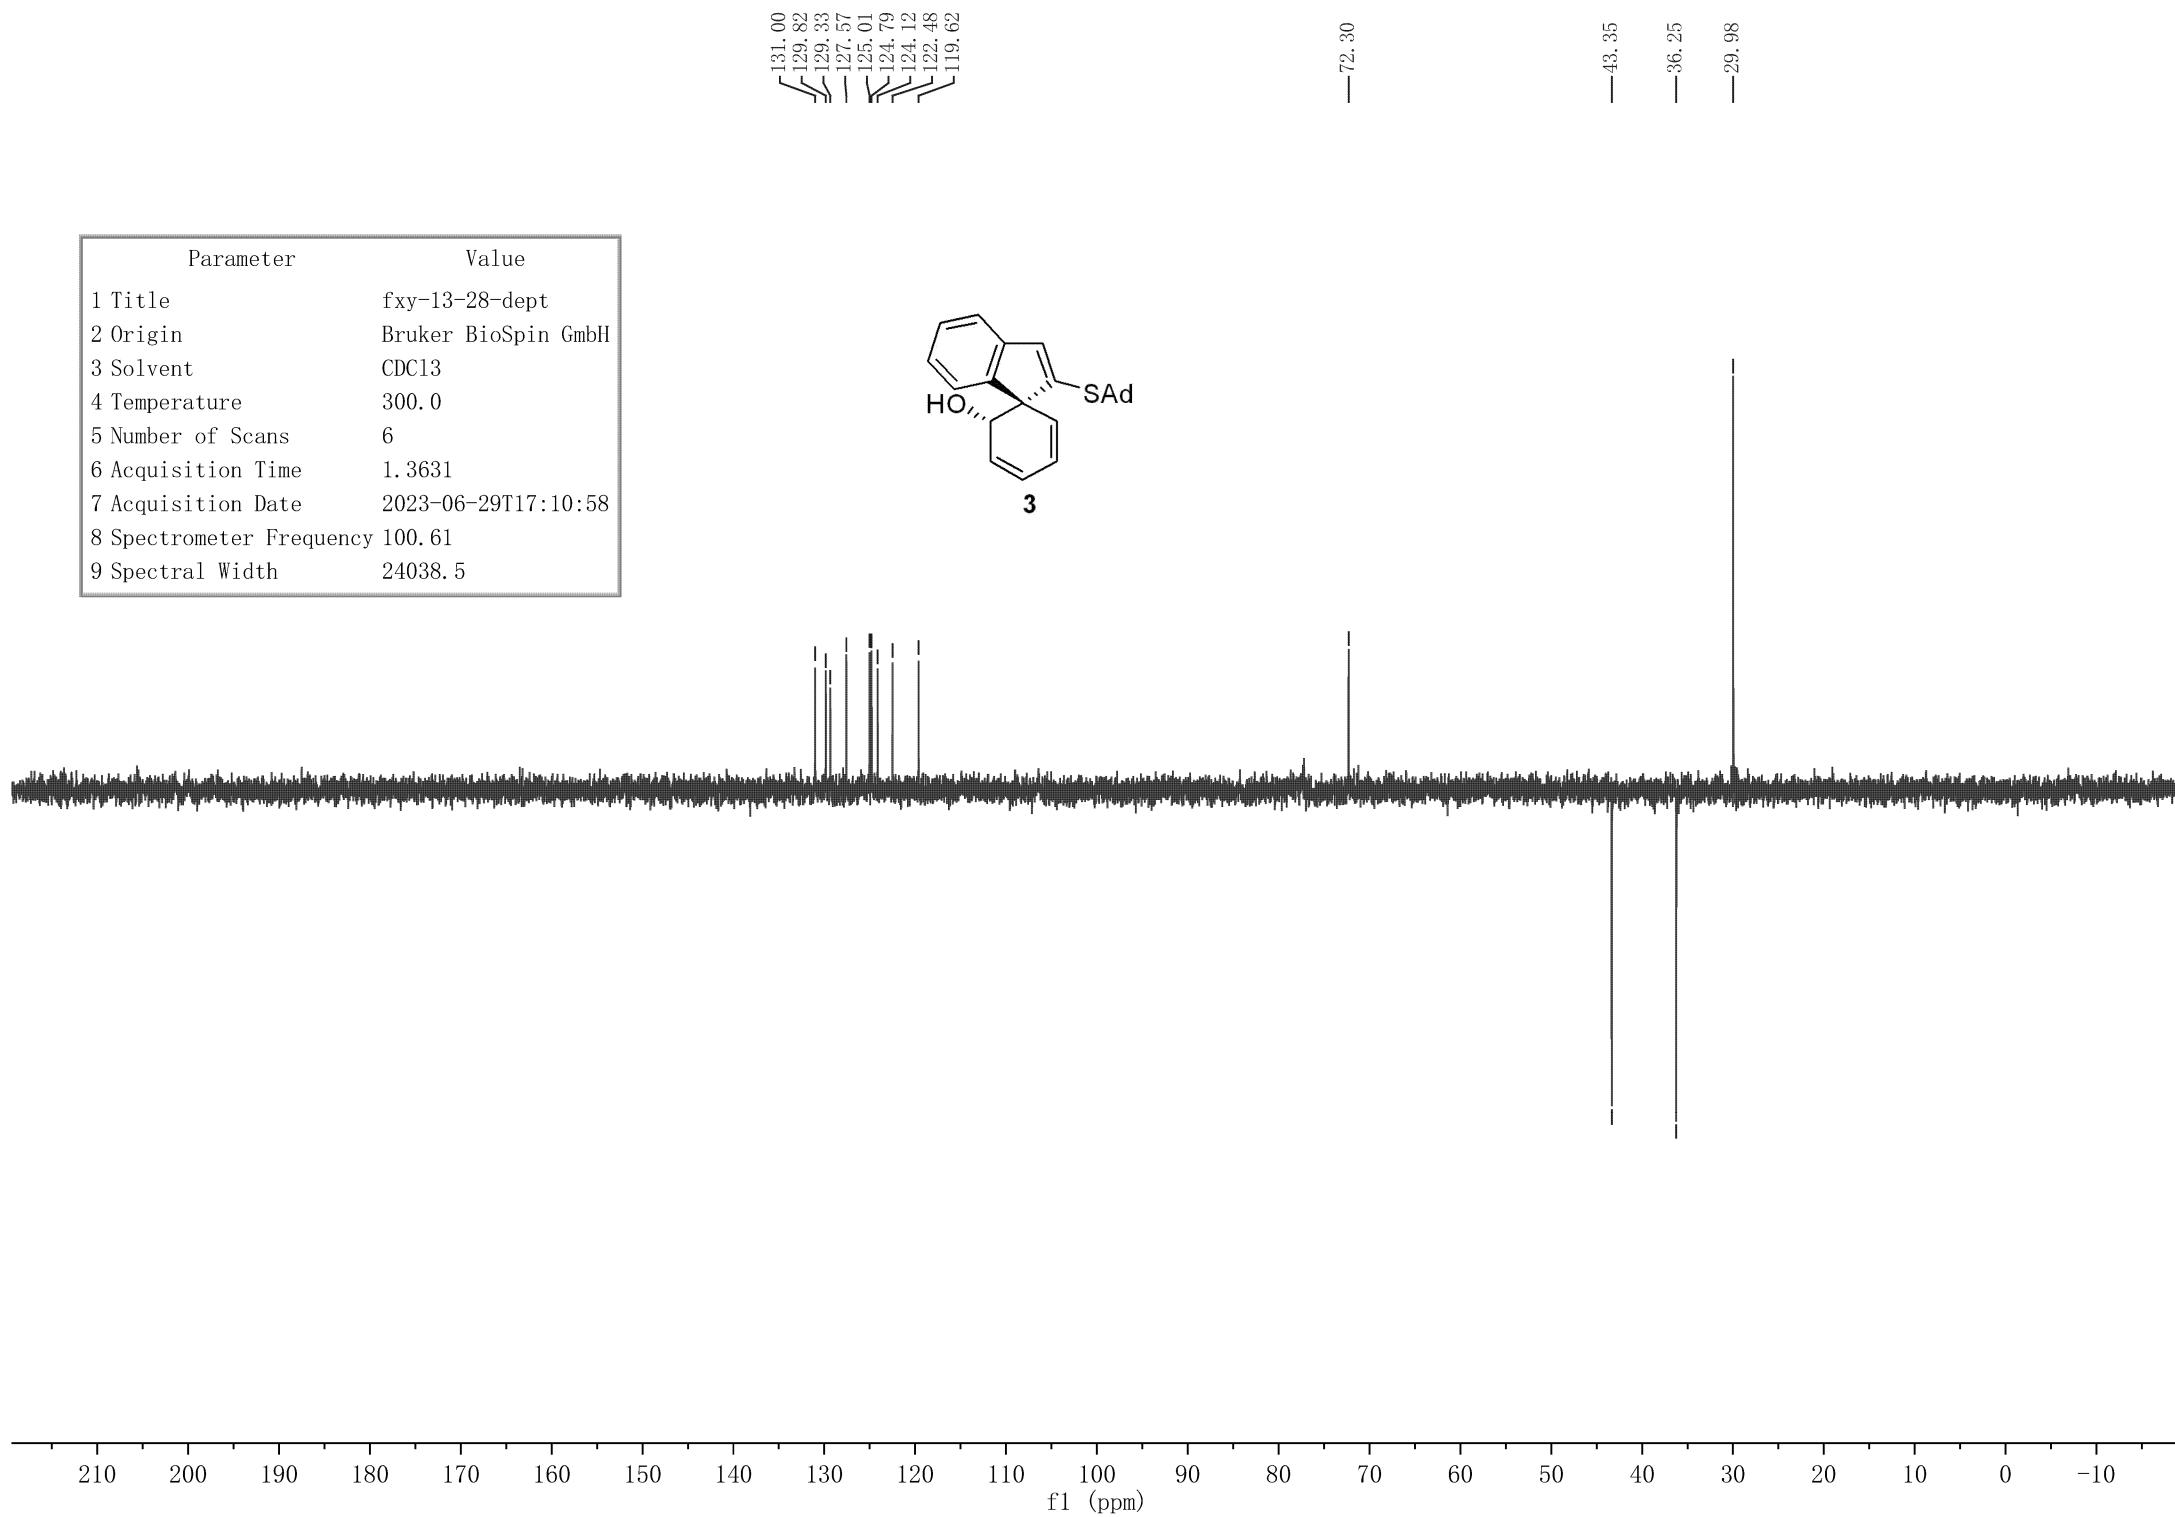

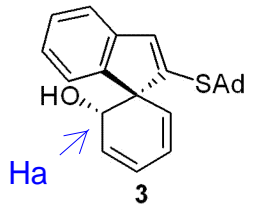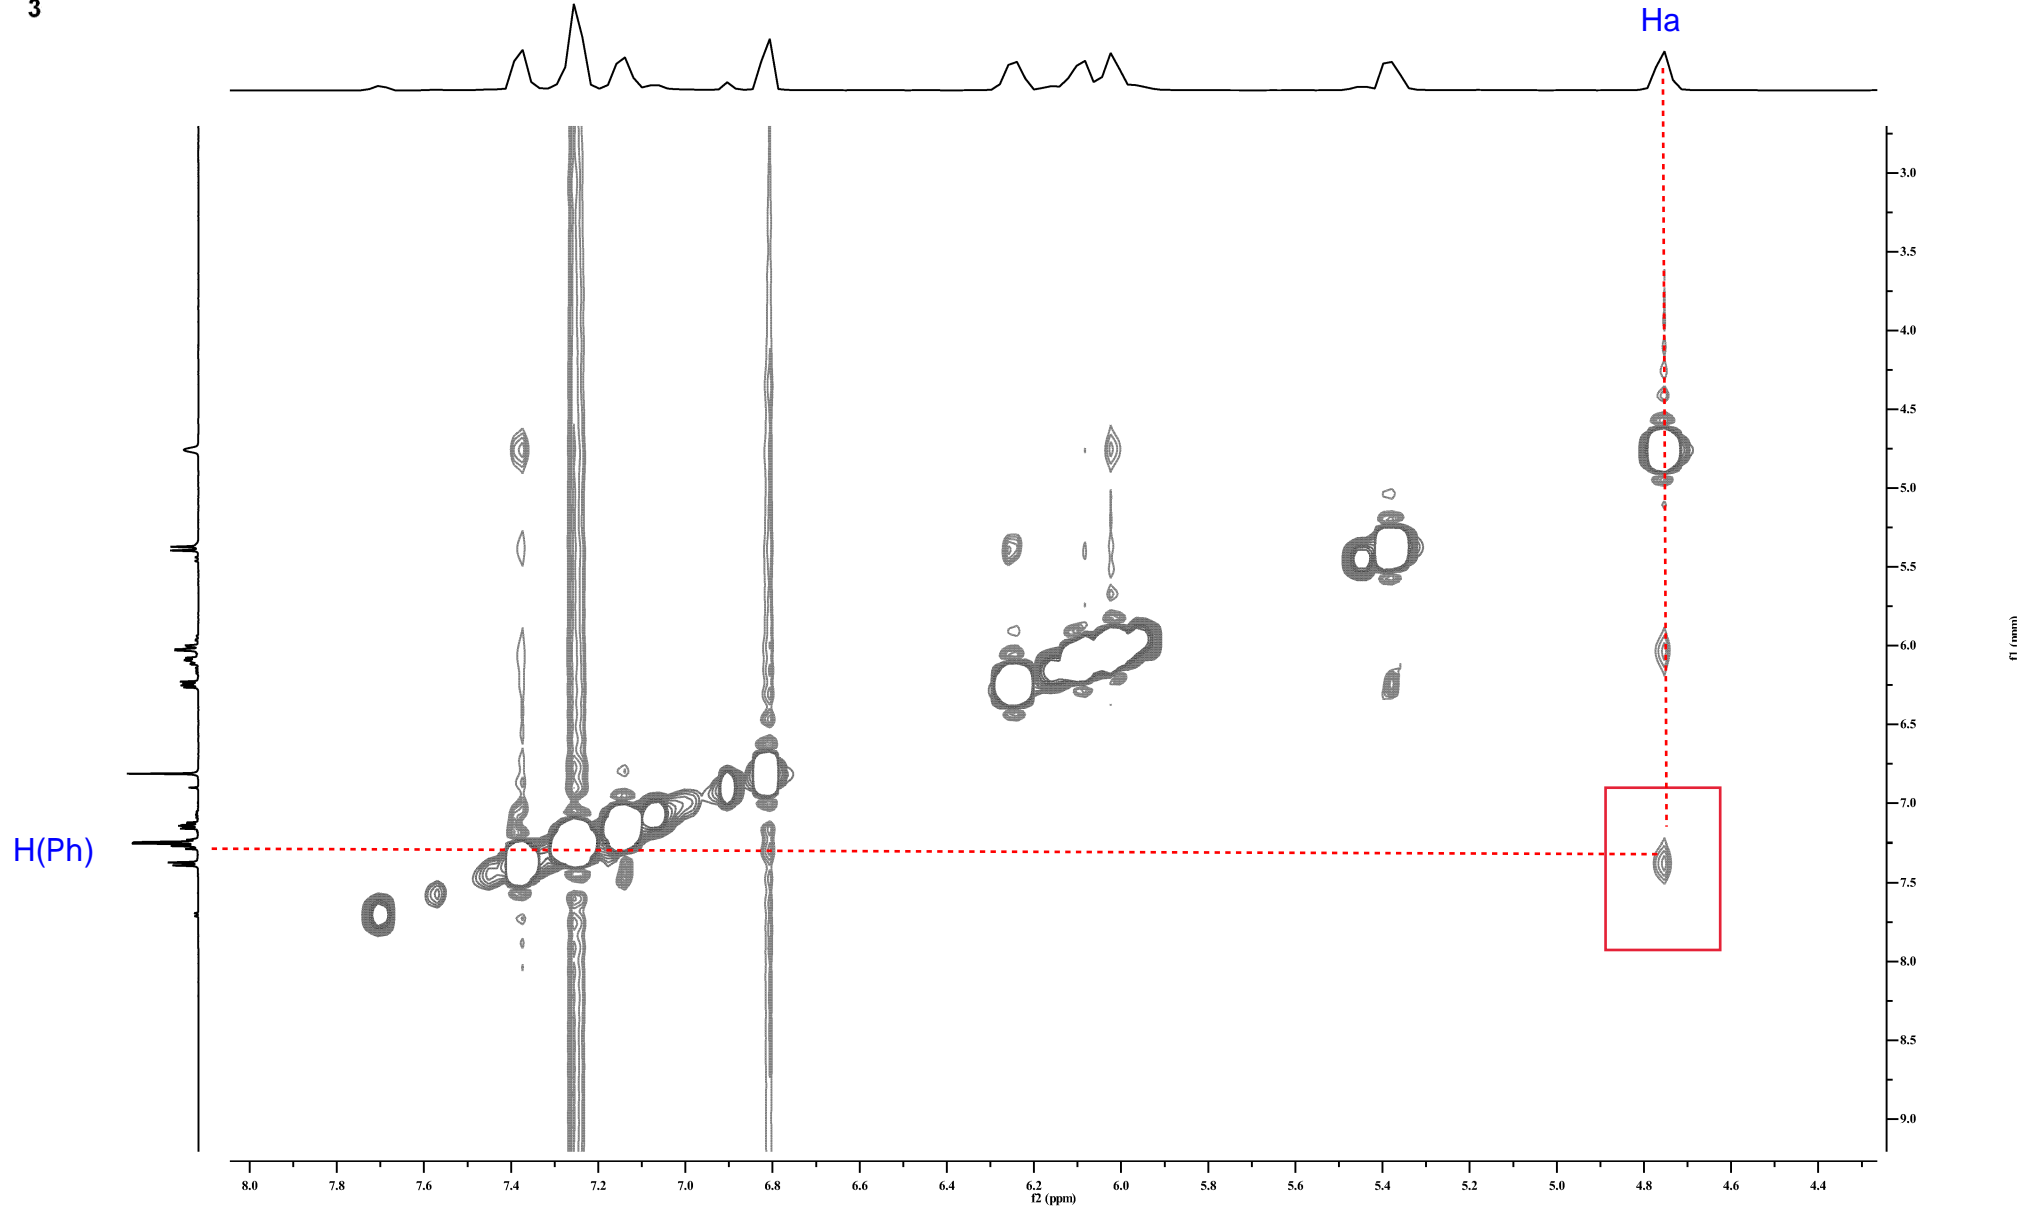

| Parameter                | Value               |
|--------------------------|---------------------|
| 1 Title                  | FXY-13-73           |
| 2 Origin                 |                     |
| 3 Solvent                | CDC13               |
| 4 Temperature            | 302.1               |
| 5 Number of Scans        | 16                  |
| 6 Acquisition Time       | 4.0002              |
| 7 Acquisition Date       | 2023-07-11T23:50:58 |
| 8 Spectrometer Frequency | 399.90              |
| 9 Spectral Width         | 8012.0              |

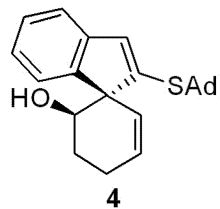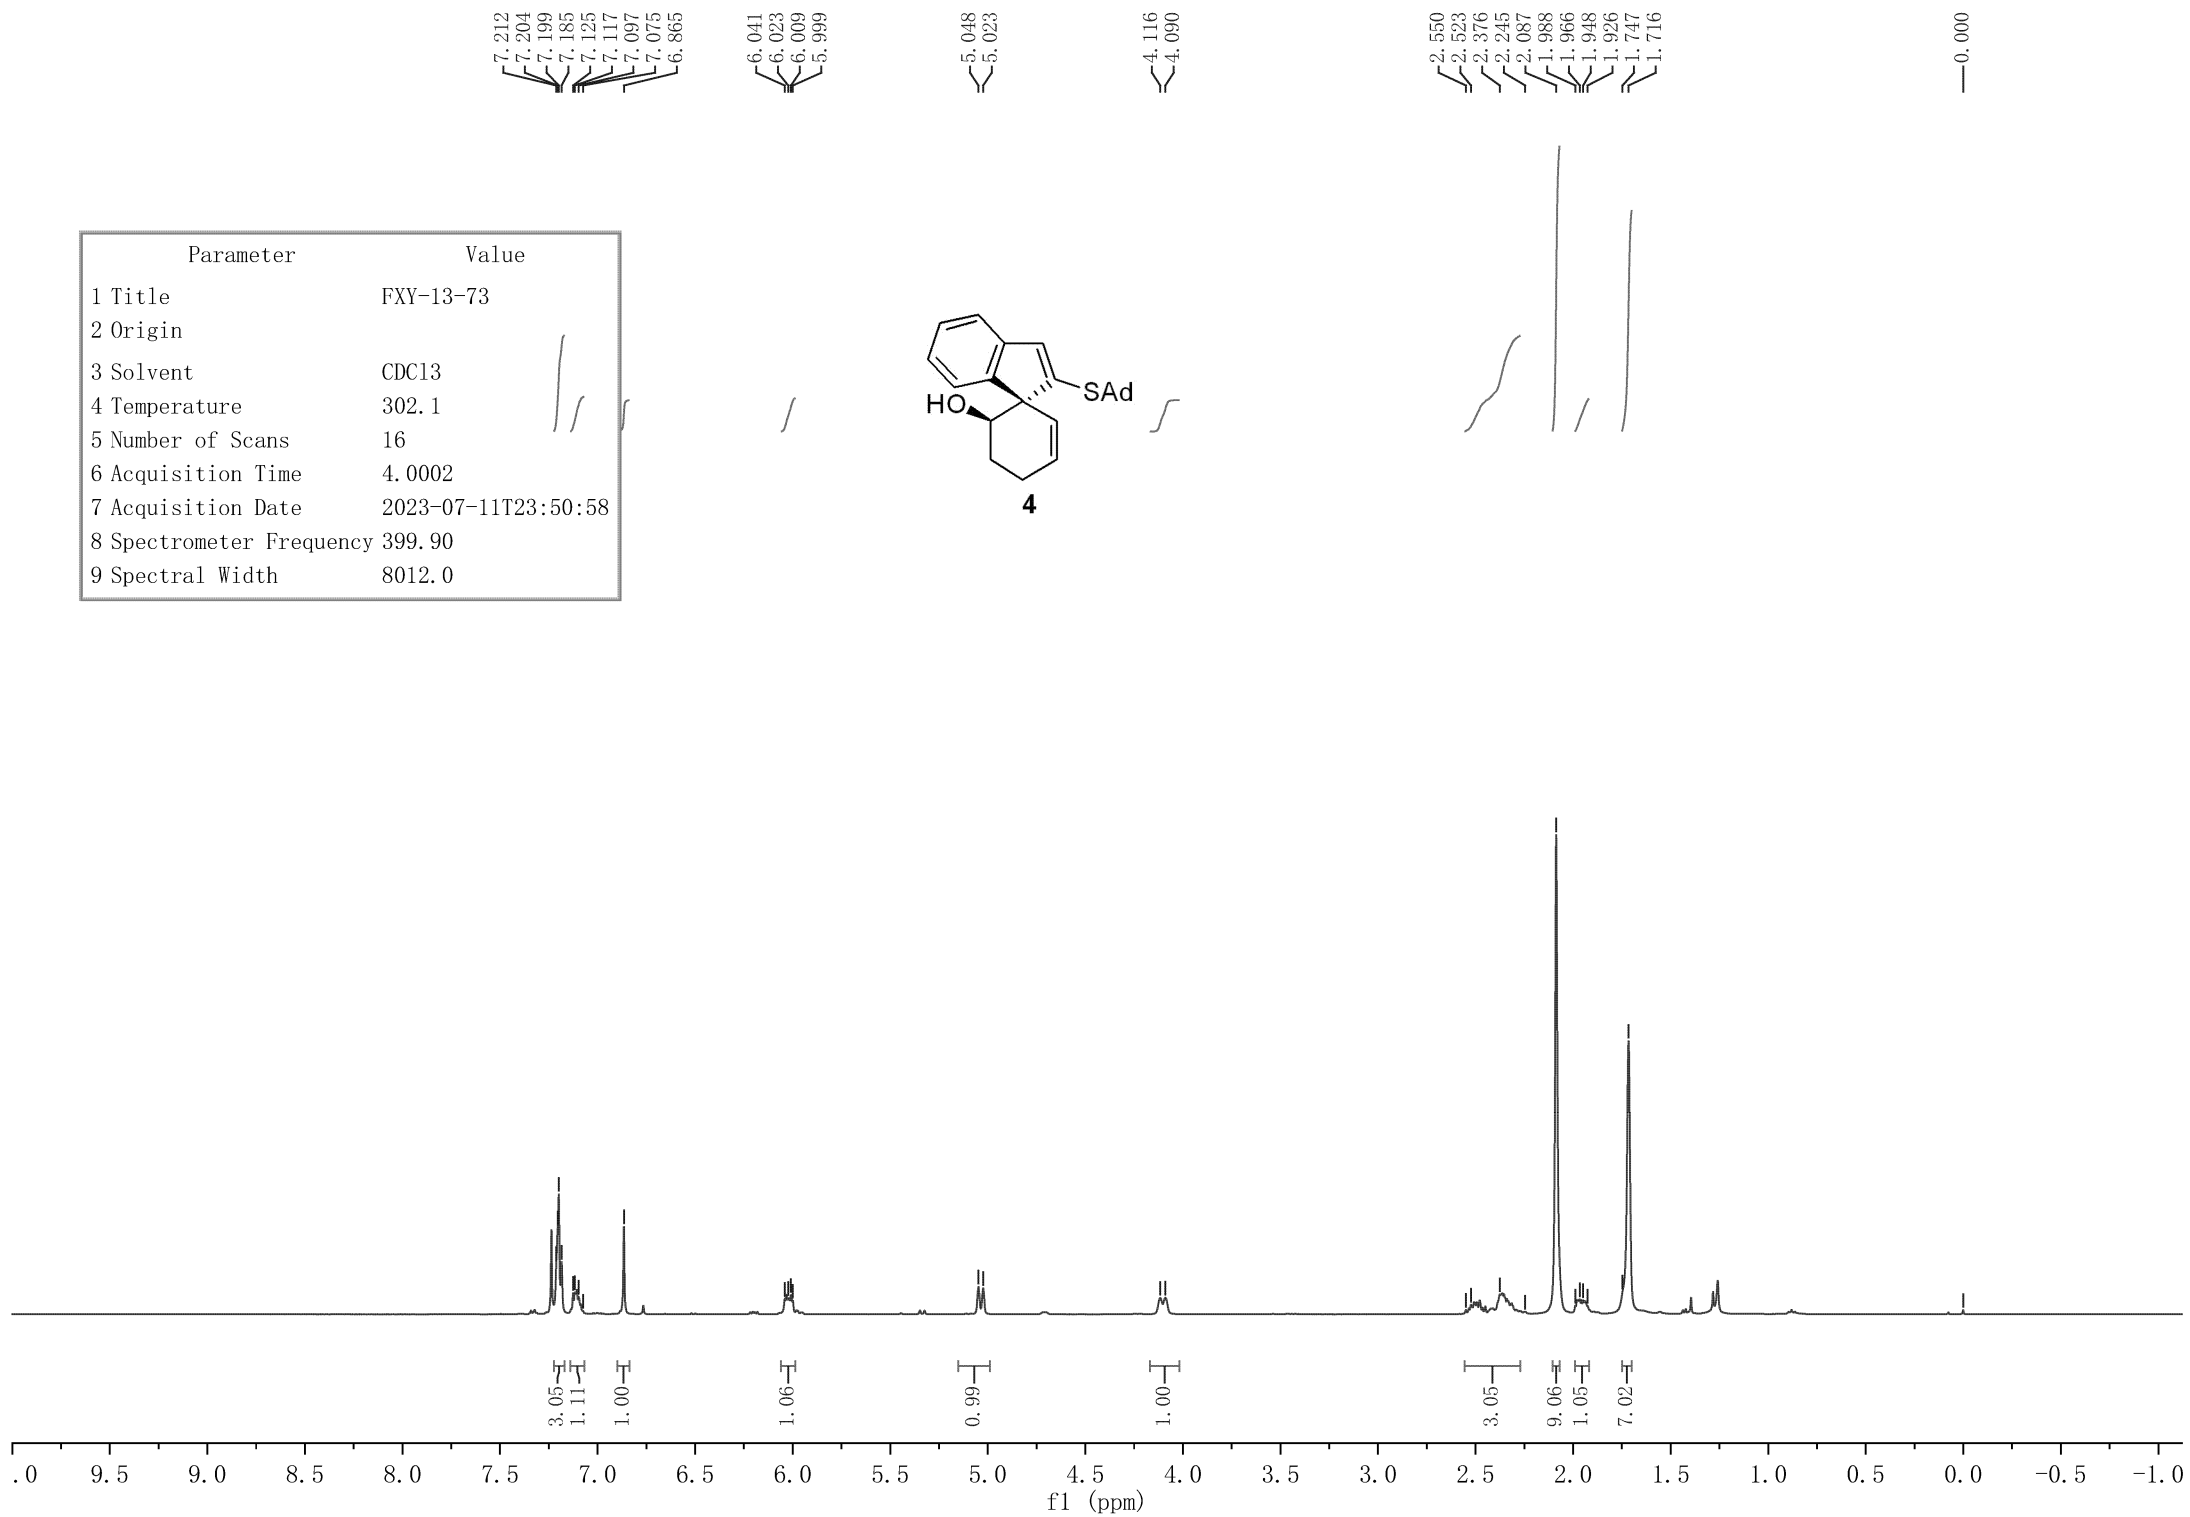

| Parameter                | Value               |
|--------------------------|---------------------|
| 1 Title                  | fxv-13-73-C         |
| 2 Origin                 | Bruker BioSpin GmbH |
| 3 Solvent                | CDC13               |
| 4 Temperature            | 300.0               |
| 5 Number of Scans        | 4                   |
| 6 Acquisition Time       | 1.3631              |
| 7 Acquisition Date       | 2023-07-12T08:45:52 |
| 8 Spectrometer Frequency | 100.61              |
| 9 Spectral Width         | 24038.5             |

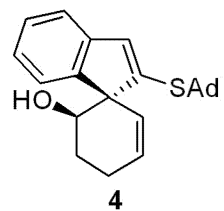

149.84  
 144.41  
 143.53  
 131.69  
 129.51  
 127.34  
 127.21  
 124.70  
 122.20  
 119.55

77.32  
 77.00  
 76.68  
 73.46  
 63.70  
 50.19  
 43.49  
 36.17  
 29.99  
 27.21  
 24.21

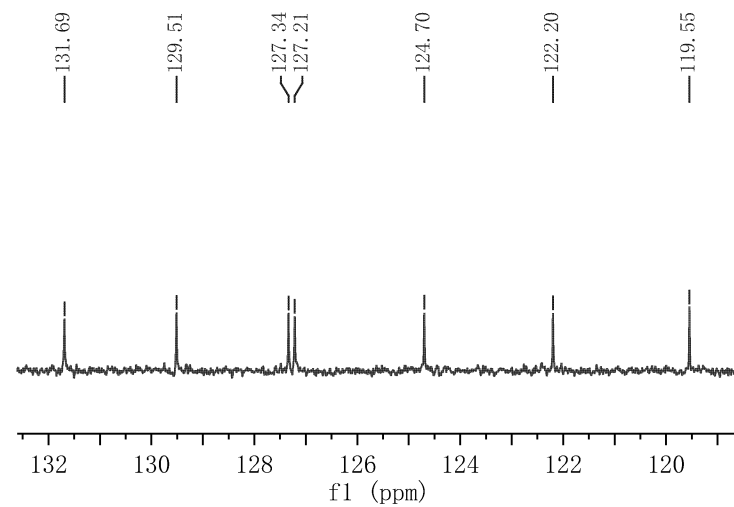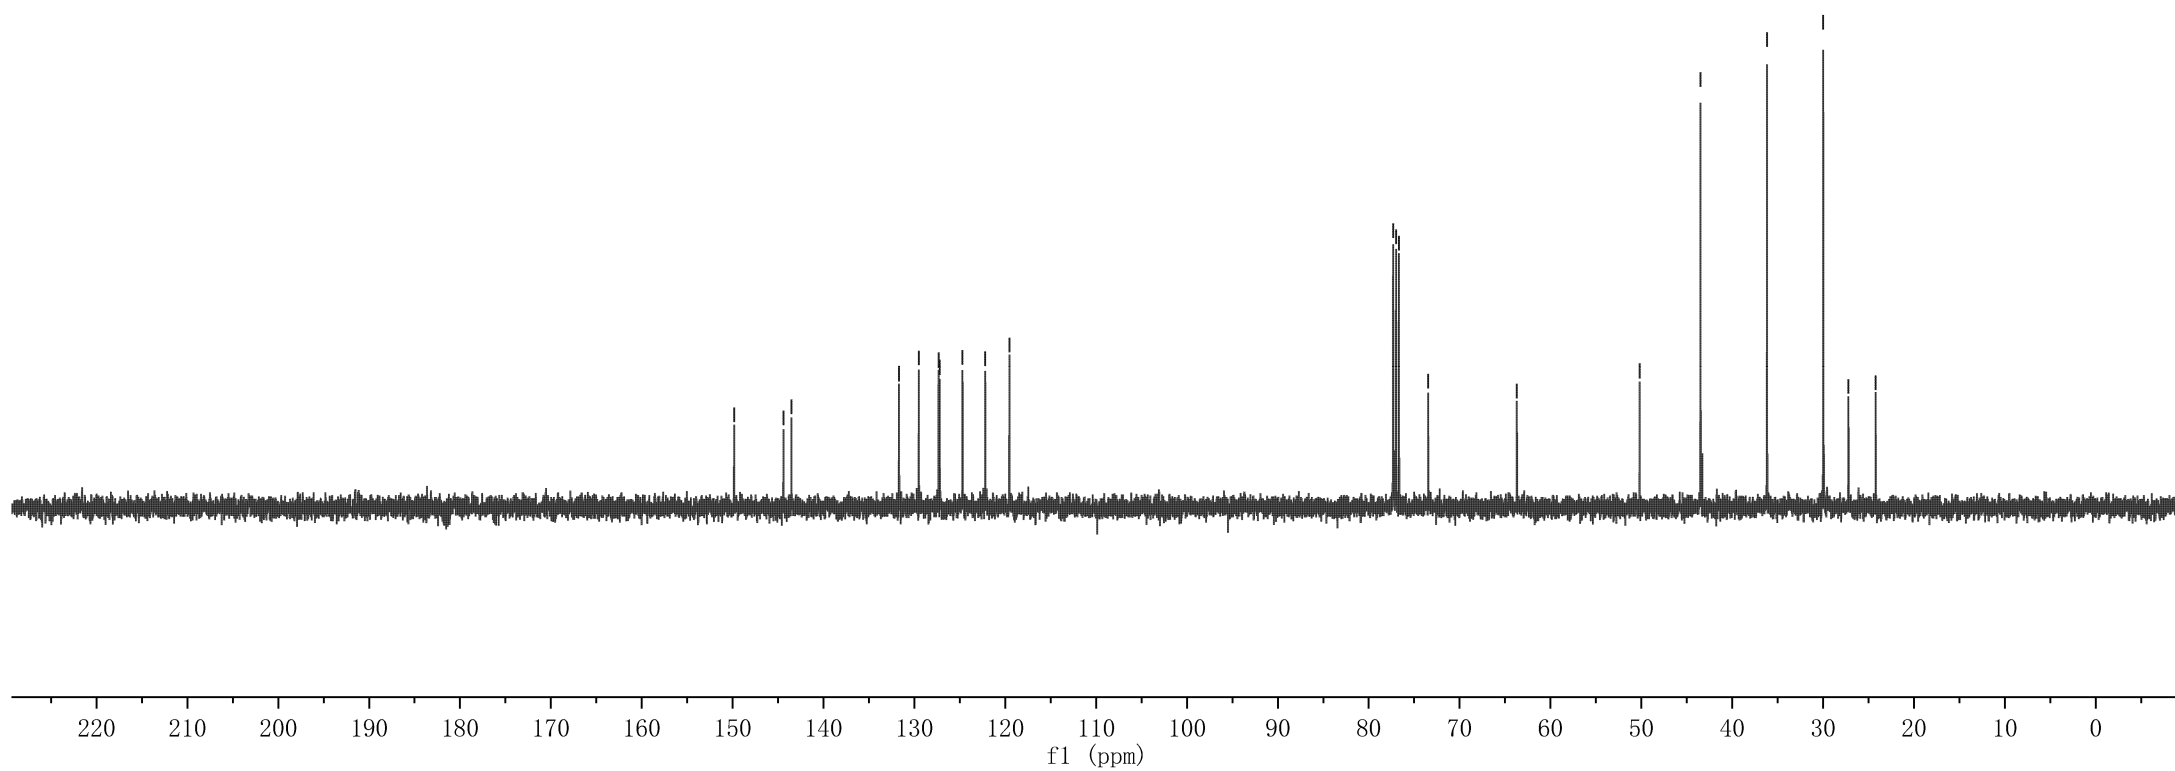

| Parameter                | Value               |
|--------------------------|---------------------|
| 1 Title                  | fxv-13-73-dept      |
| 2 Origin                 | Bruker BioSpin GmbH |
| 3 Solvent                | CDC13               |
| 4 Temperature            | 300.0               |
| 5 Number of Scans        | 8                   |
| 6 Acquisition Time       | 1.3631              |
| 7 Acquisition Date       | 2023-07-12T08:47:00 |
| 8 Spectrometer Frequency | 100.61              |
| 9 Spectral Width         | 24038.5             |

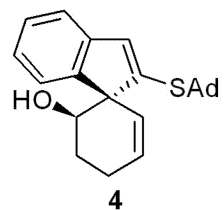

131.70  
129.51  
127.33  
127.21  
124.70  
122.20  
119.54

73.45

43.49

36.17

29.98  
27.20  
24.21

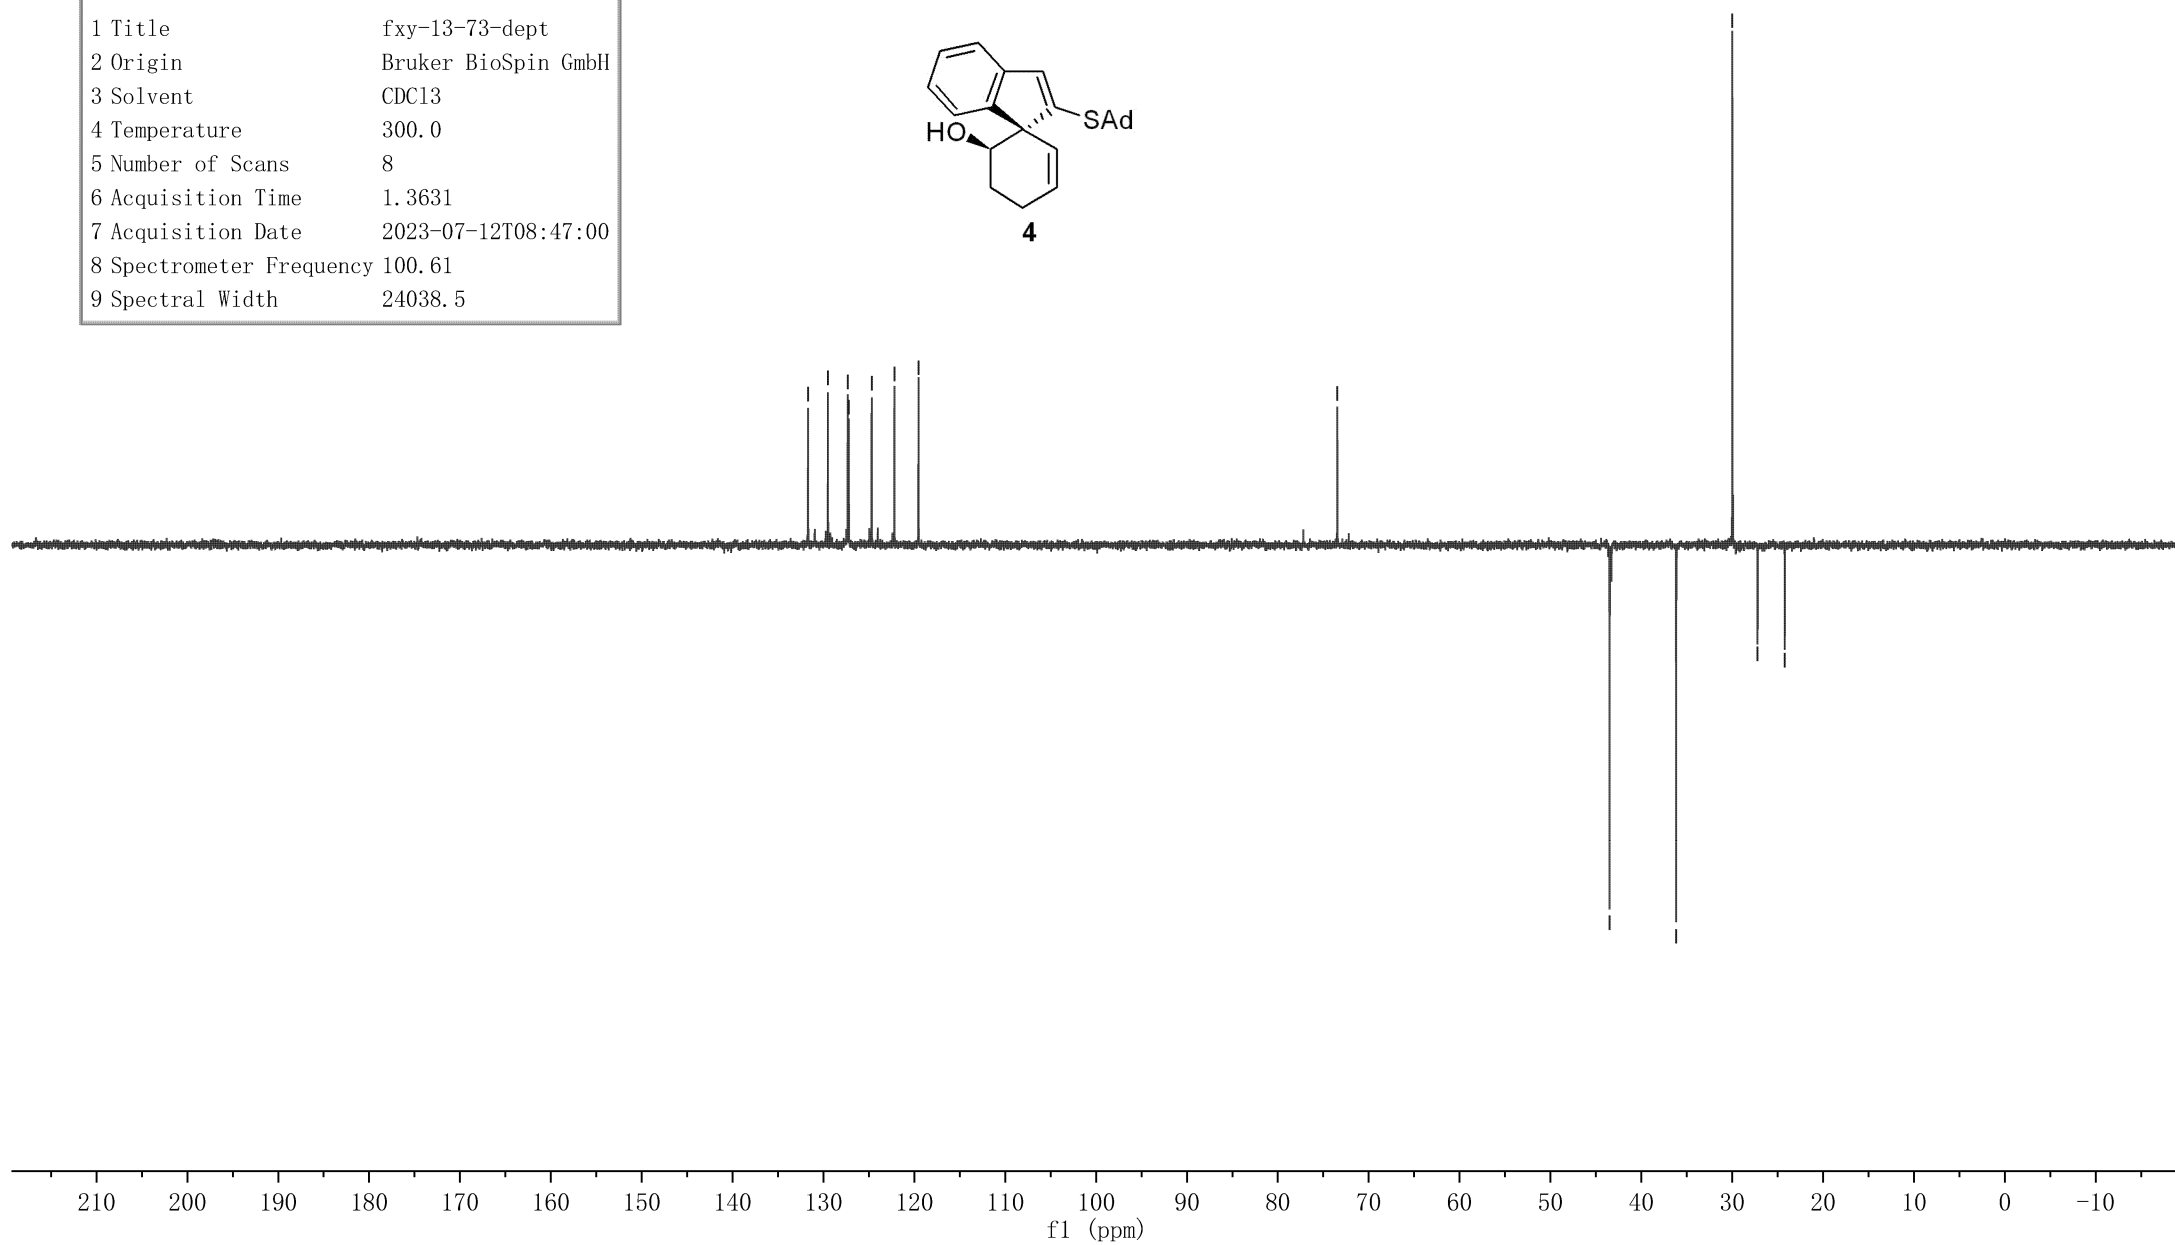

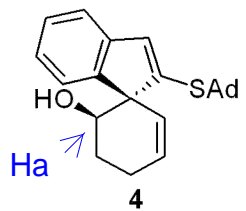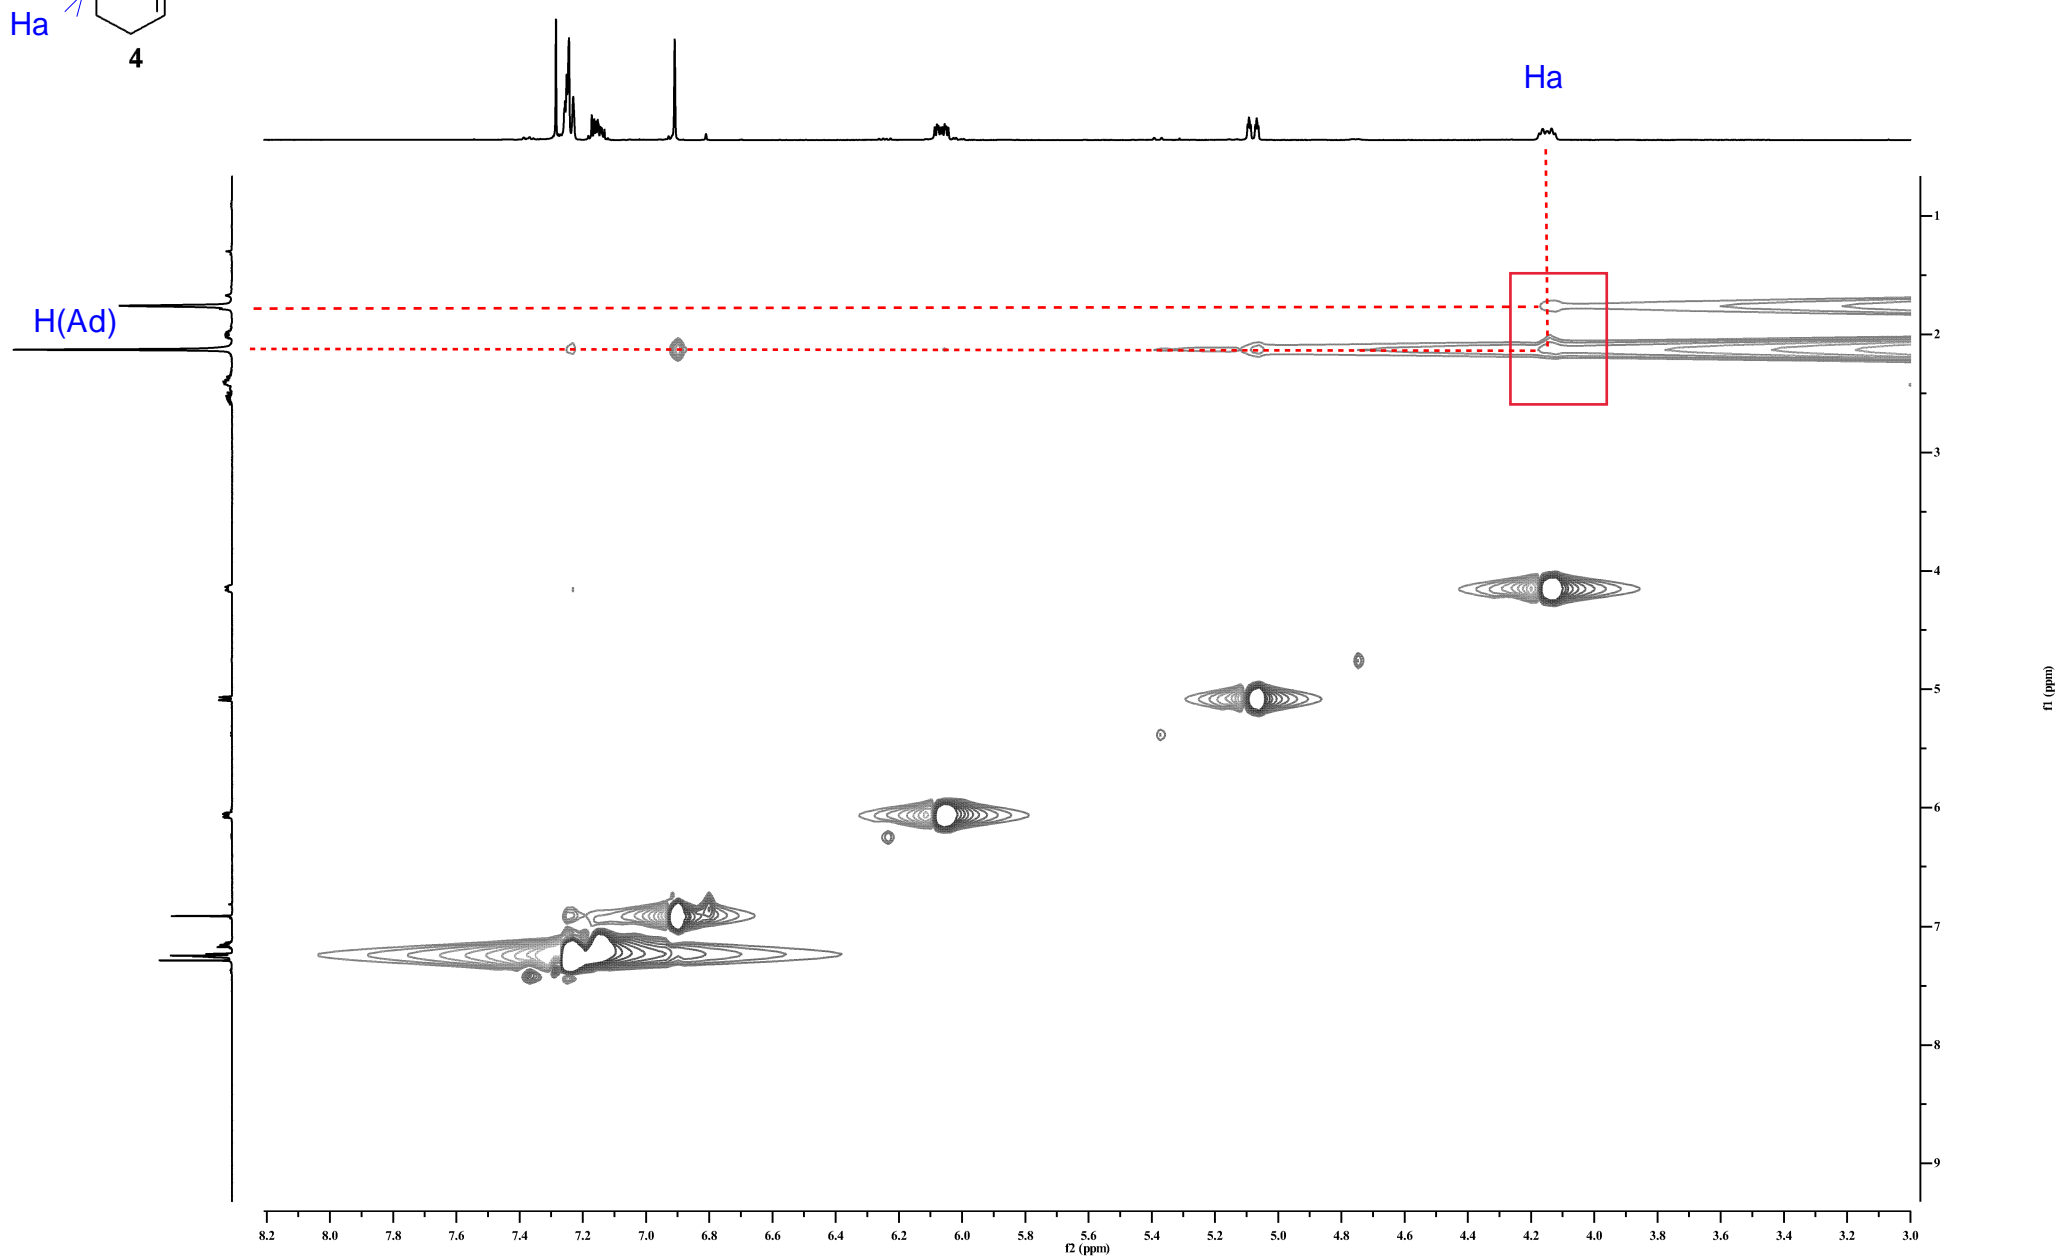

| Parameter                | Value               |
|--------------------------|---------------------|
| 1 Title                  | fxy-5-H             |
| 2 Origin                 | Bruker BioSpin GmbH |
| 3 Solvent                | CDC13               |
| 4 Temperature            | 298.0               |
| 5 Number of Scans        | 5                   |
| 6 Acquisition Time       | 4.0894              |
| 7 Acquisition Date       | 2023-07-12T21:30:45 |
| 8 Spectrometer Frequency | 400.13              |
| 9 Spectral Width         | 8012.8              |

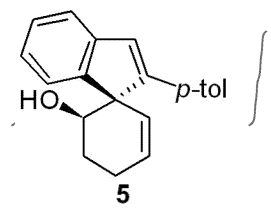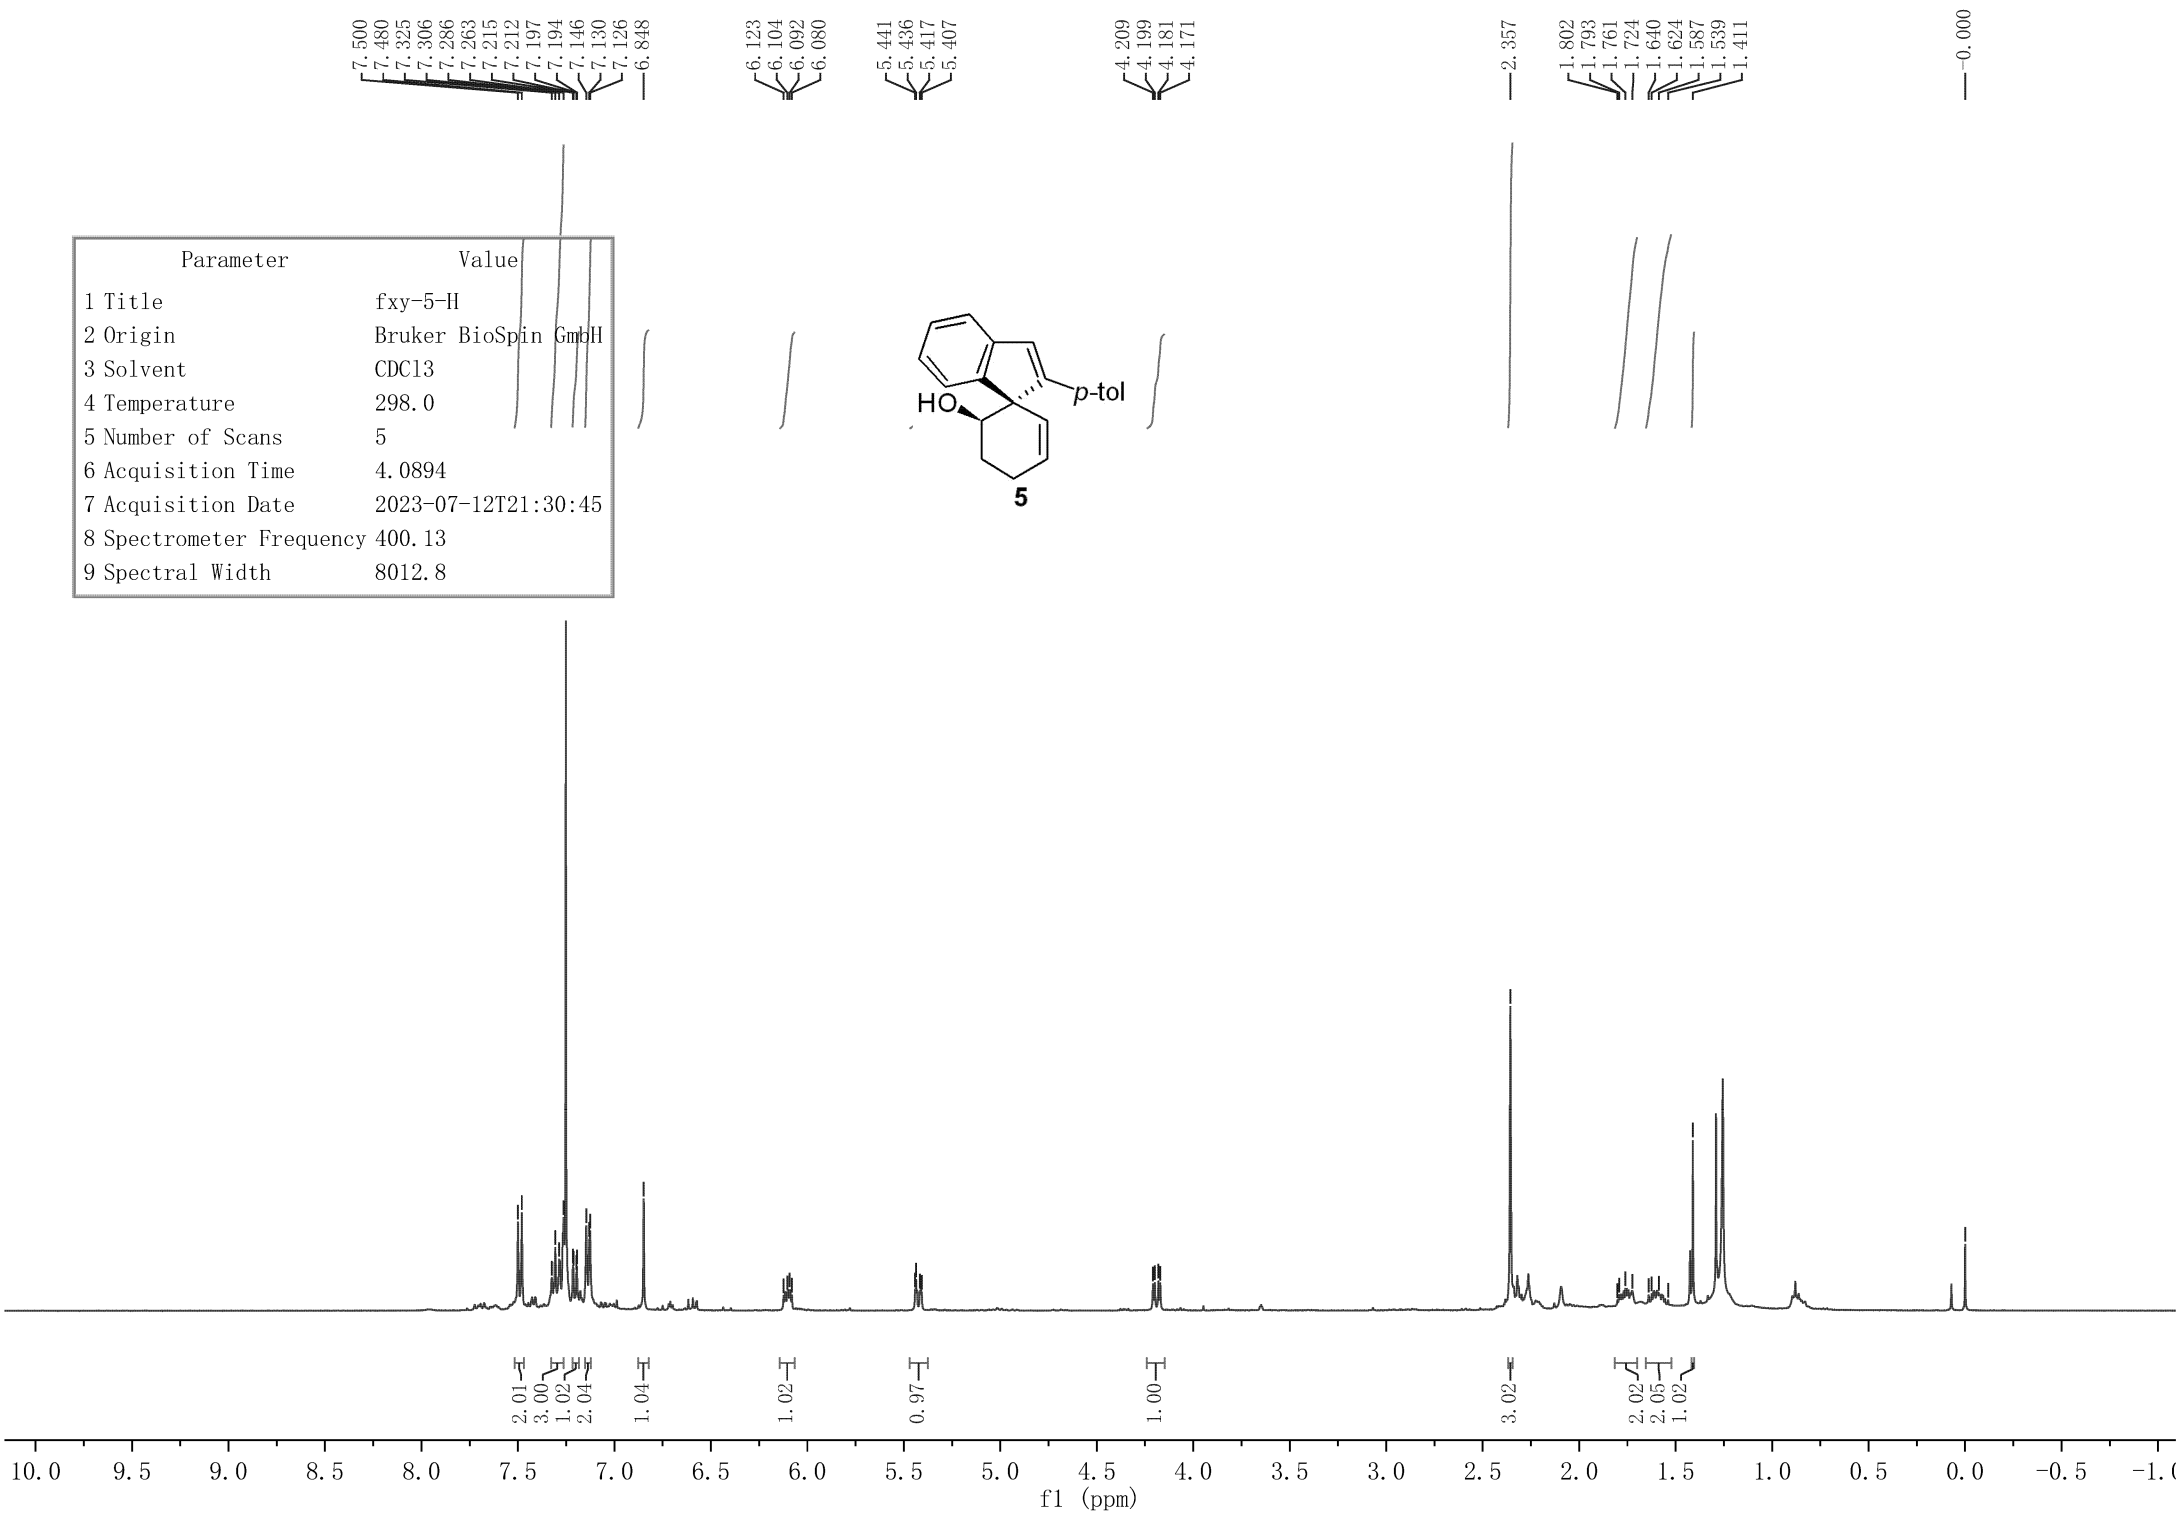

| Parameter                | Value               |
|--------------------------|---------------------|
| 1 Title                  | FXY-13-KUMADA       |
| 2 Origin                 |                     |
| 3 Solvent                | CDC13               |
| 4 Temperature            | 299.2               |
| 5 Number of Scans        | 800                 |
| 6 Acquisition Time       | 1.0000              |
| 7 Acquisition Date       | 2023-08-22T06:53:25 |
| 8 Spectrometer Frequency | 100.56              |
| 9 Spectral Width         | 26041.0             |

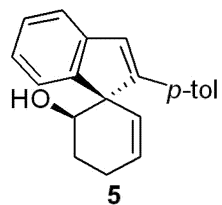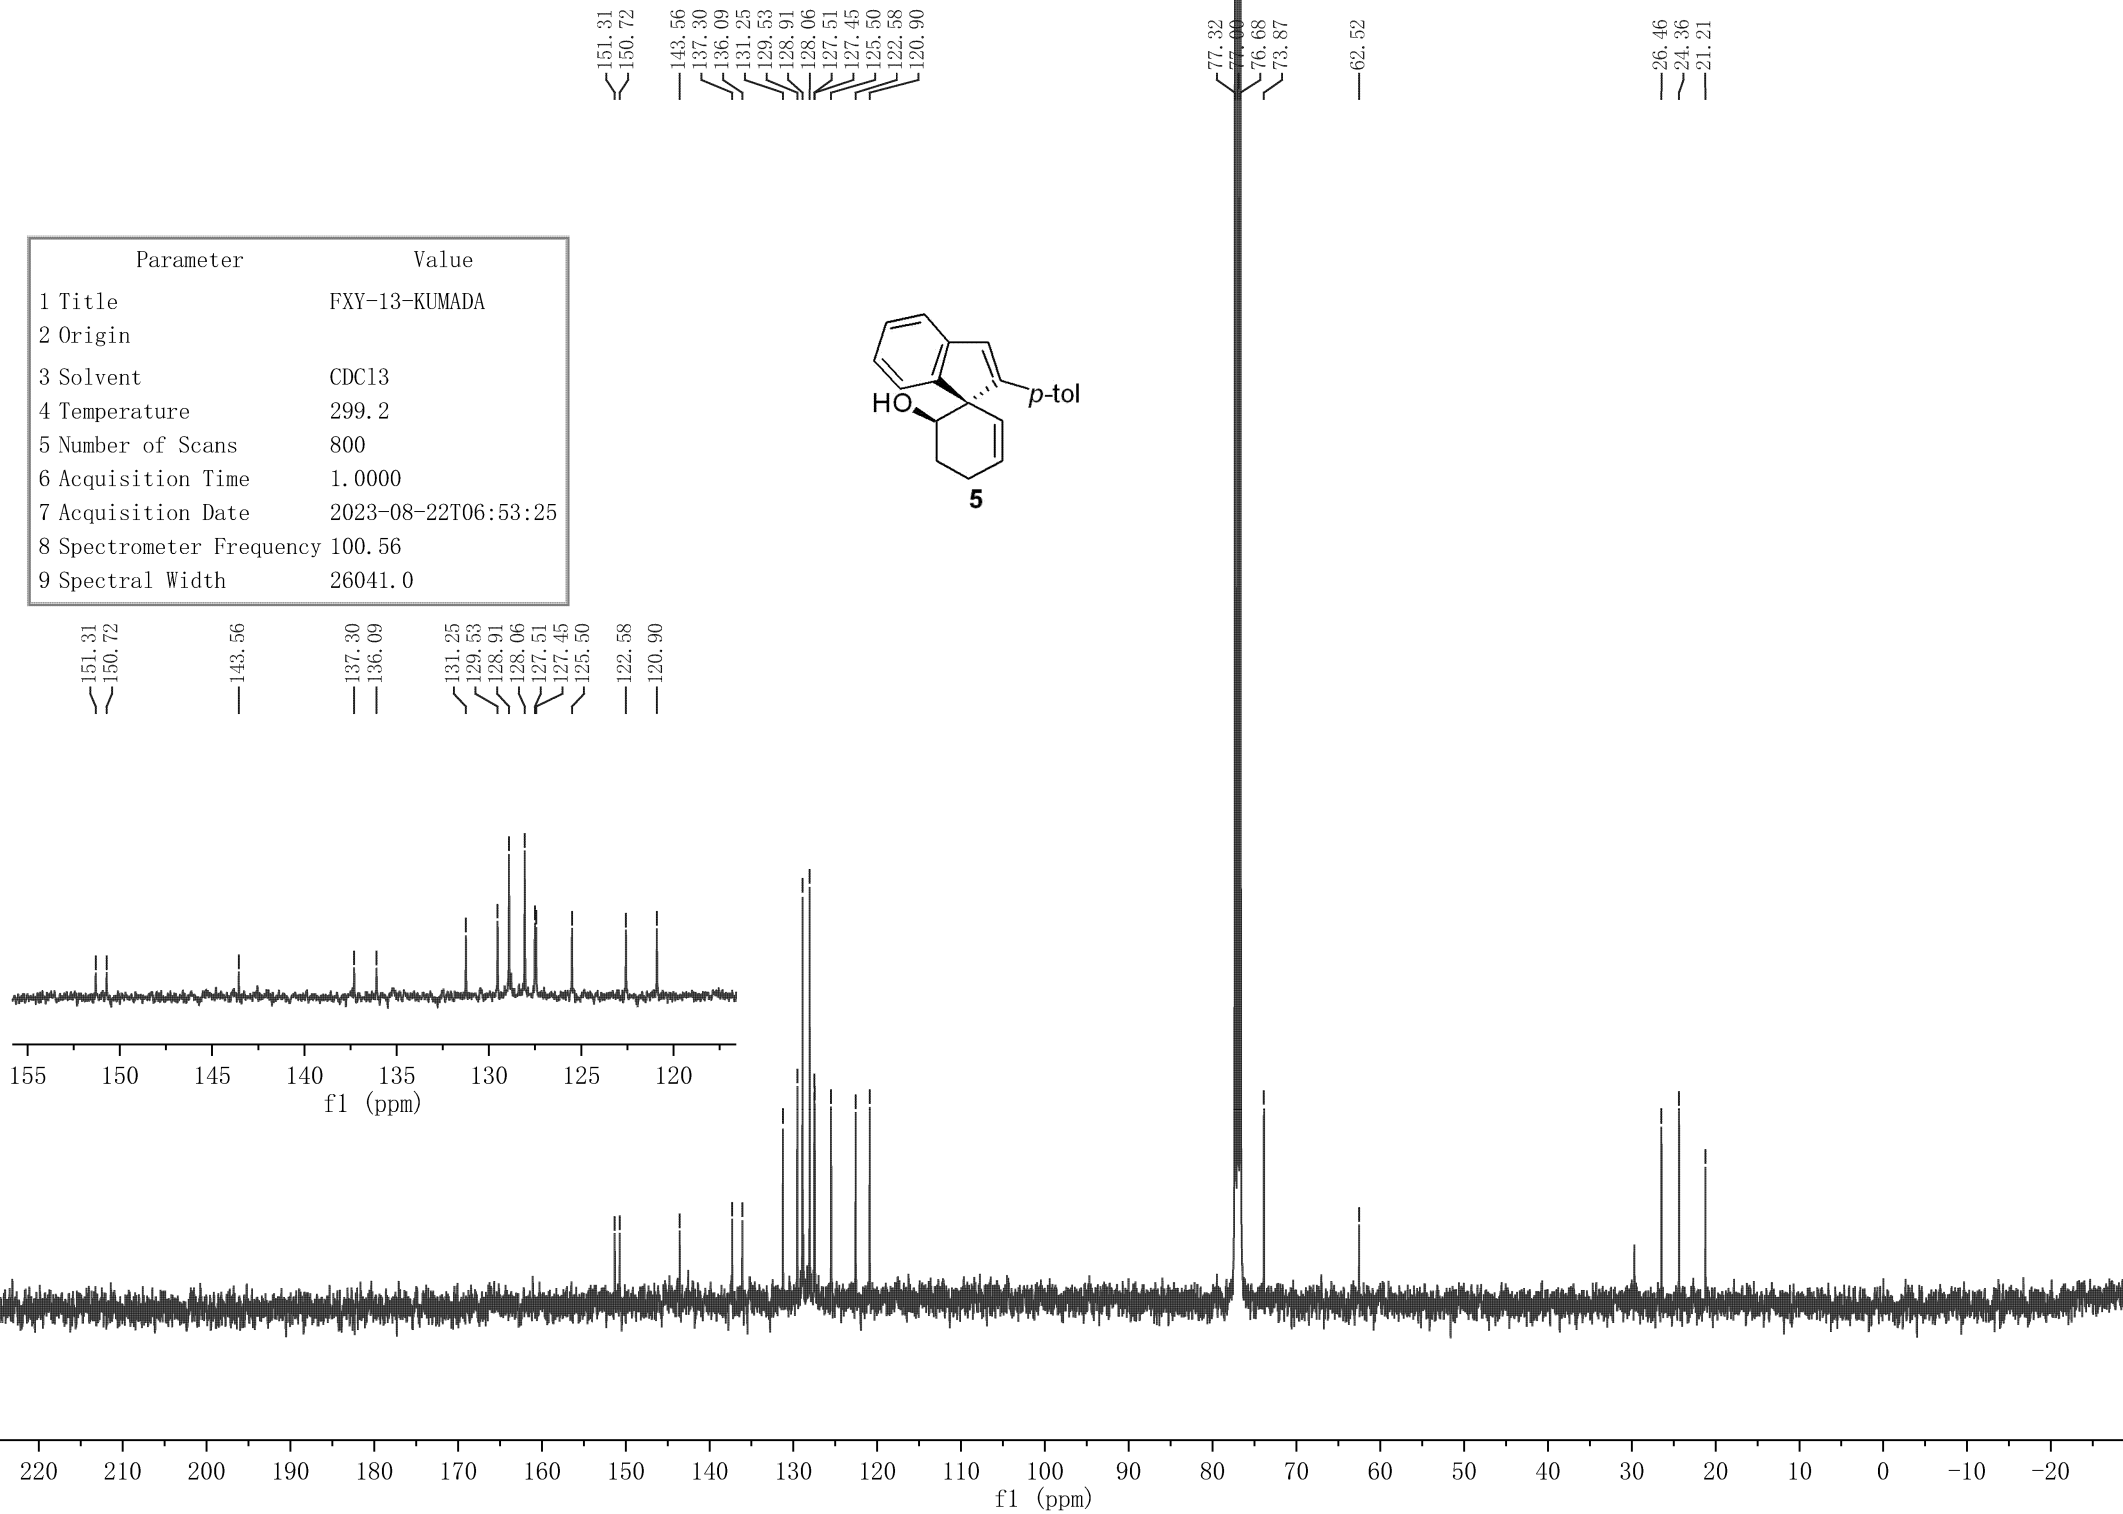



| Parameter                | Value               |
|--------------------------|---------------------|
| 1 Title                  | fxv-5-dept          |
| 2 Origin                 | Bruker BioSpin GmbH |
| 3 Solvent                | CDC13               |
| 4 Temperature            | 300.0               |
| 5 Number of Scans        | 48                  |
| 6 Acquisition Time       | 1.3631              |
| 7 Acquisition Date       | 2023-07-12T21:33:39 |
| 8 Spectrometer Frequency | 100.61              |
| 9 Spectral Width         | 24038.5             |



131.26  
129.53  
128.92  
128.08  
127.52  
127.49  
125.51  
122.59  
120.91

73.89

26.49  
24.37  
21.21

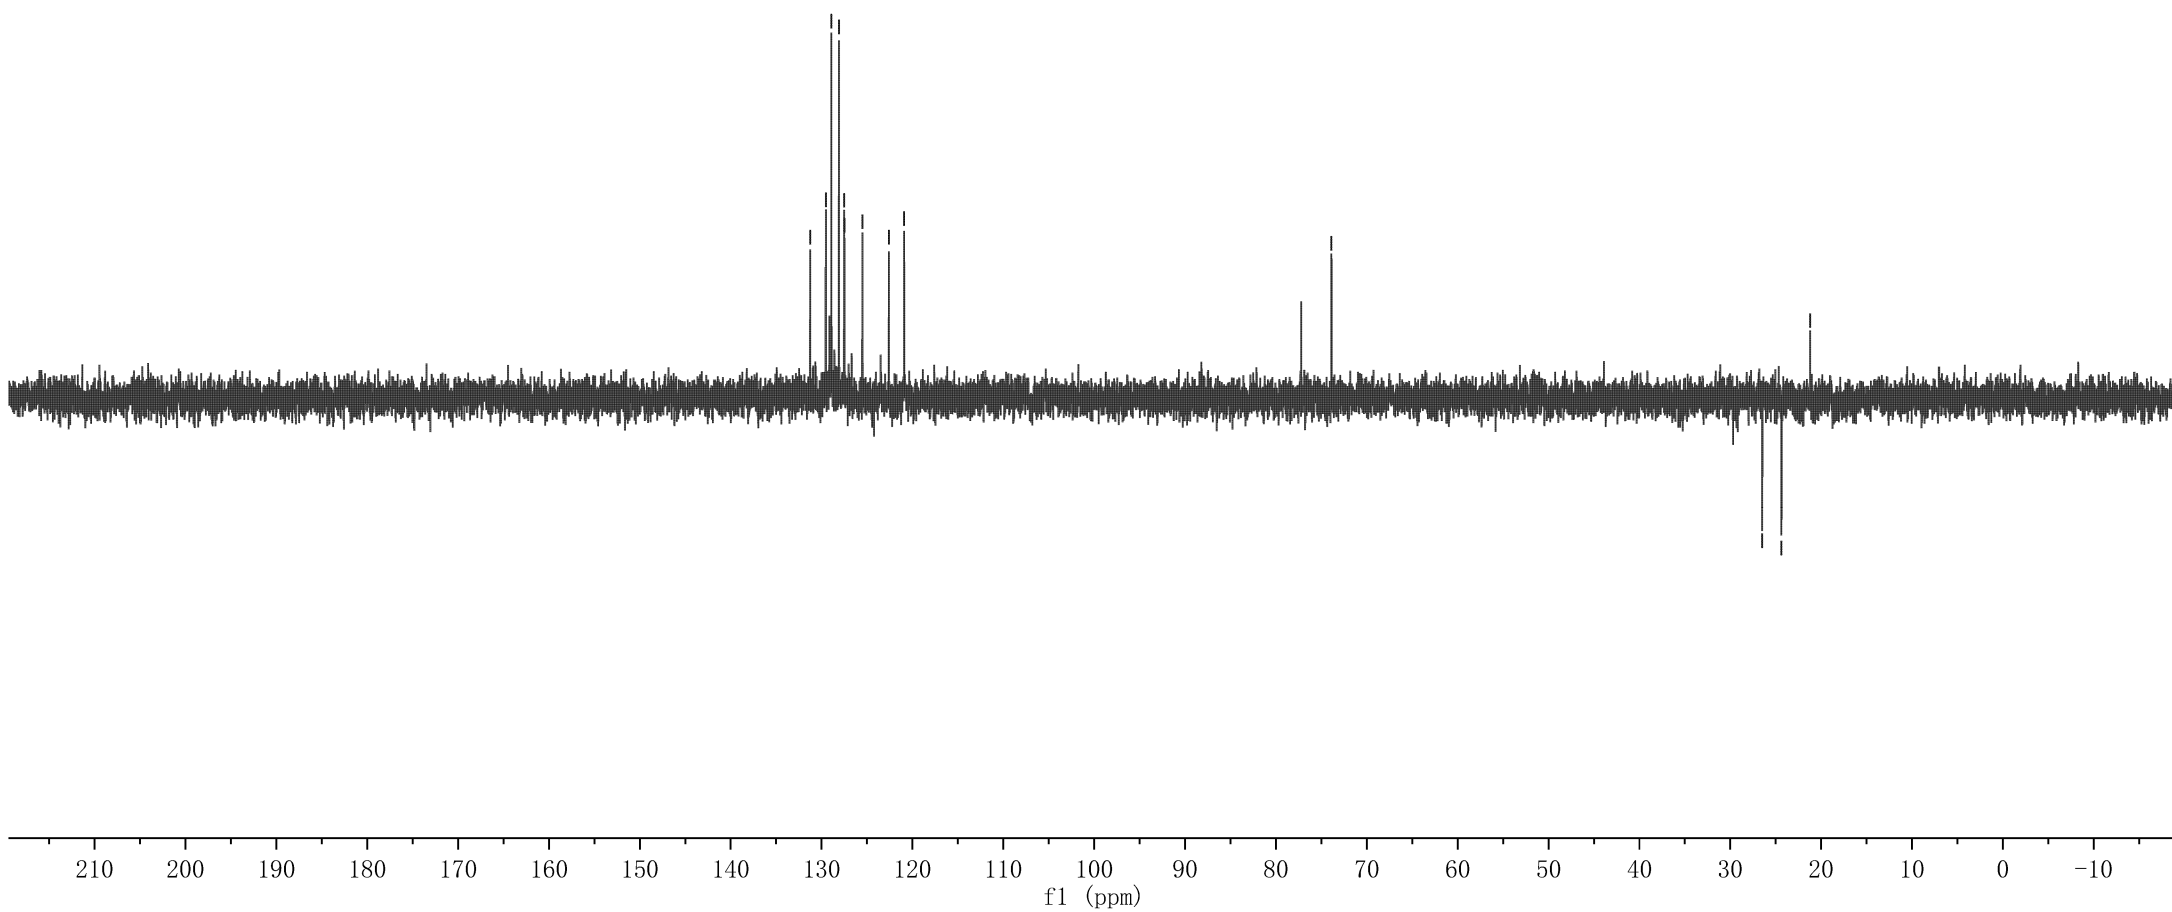

7.610  
7.591  
7.266  
7.253  
7.209  
7.200  
7.145  
7.126  
7.117  
7.104  
6.901

2.848  
2.833  
2.778  
2.764  
2.700  
2.690  
2.681  
2.651  
2.581  
2.550  
2.517  
2.506  
2.216  
2.183  
2.070  
2.050  
2.013  
0.000

| Parameter                | Value               |
|--------------------------|---------------------|
| 1 Title                  | fxv-13-78_H         |
| 2 Origin                 | Bruker BioSpin GmbH |
| 3 Solvent                | CDC13               |
| 4 Temperature            | 298.0               |
| 5 Number of Scans        | 4                   |
| 6 Acquisition Time       | 4.0894              |
| 7 Acquisition Date       | 2023-07-13T20:50:04 |
| 8 Spectrometer Frequency | 400.13              |
| 9 Spectral Width         | 8012.8              |

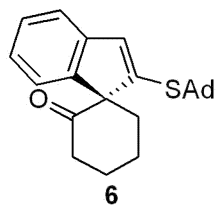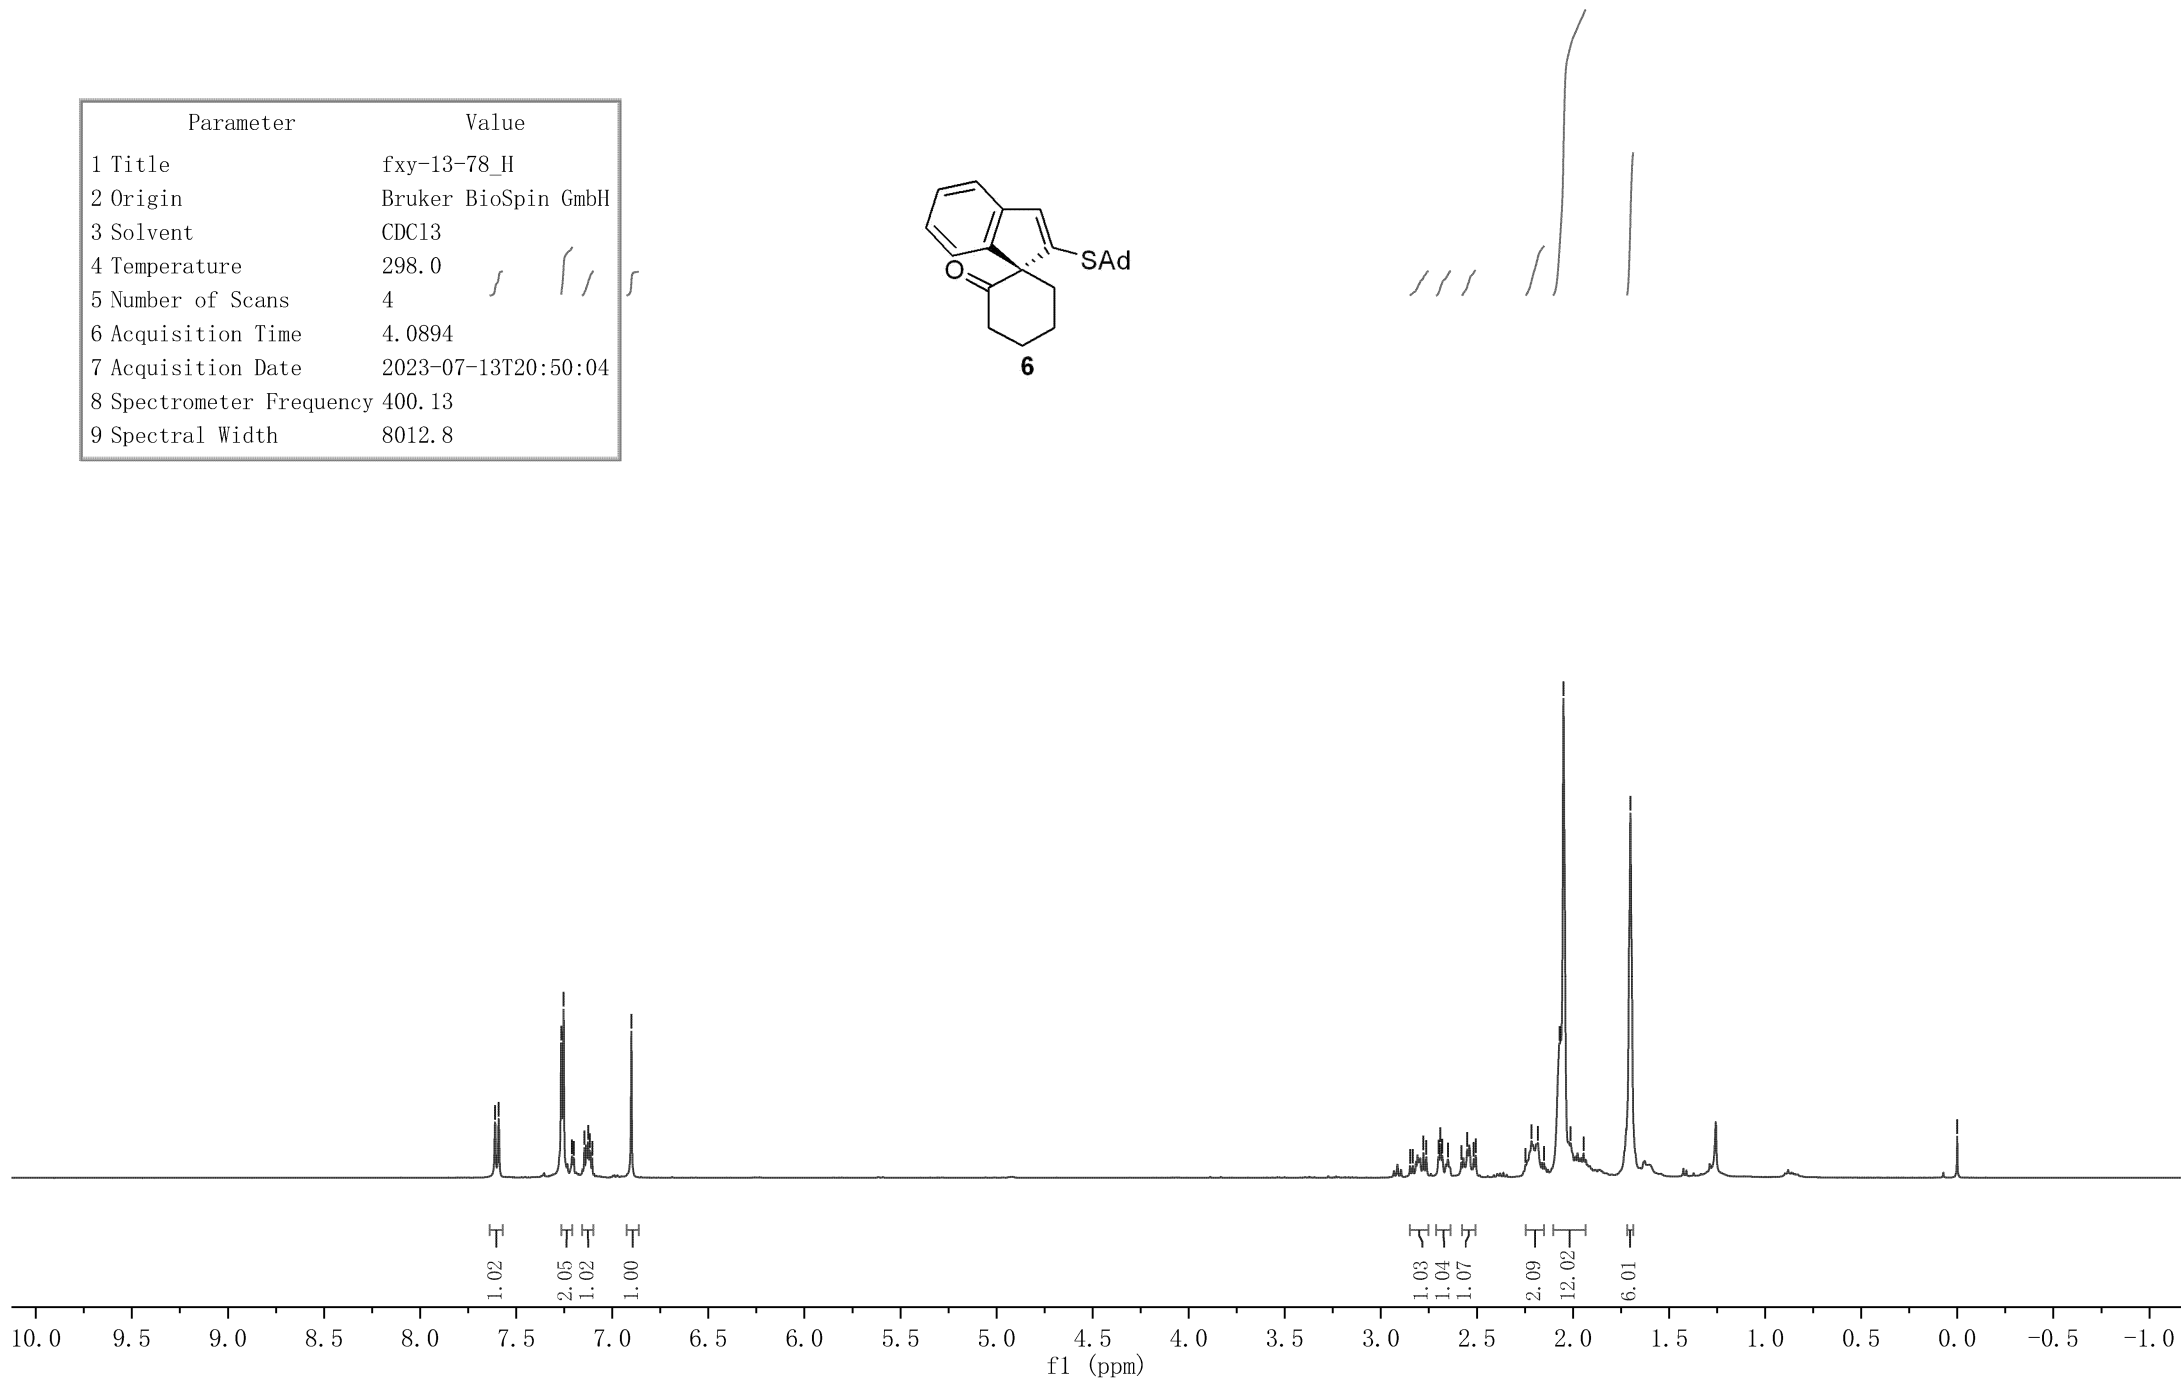

| Parameter                | Value               |
|--------------------------|---------------------|
| 1 Title                  | fxv-13-78_C         |
| 2 Origin                 | Bruker BioSpin GmbH |
| 3 Solvent                | CDC13               |
| 4 Temperature            | 300.0               |
| 5 Number of Scans        | 21                  |
| 6 Acquisition Time       | 1.3631              |
| 7 Acquisition Date       | 2023-07-13T20:52:17 |
| 8 Spectrometer Frequency | 100.61              |
| 9 Spectral Width         | 24038.5             |

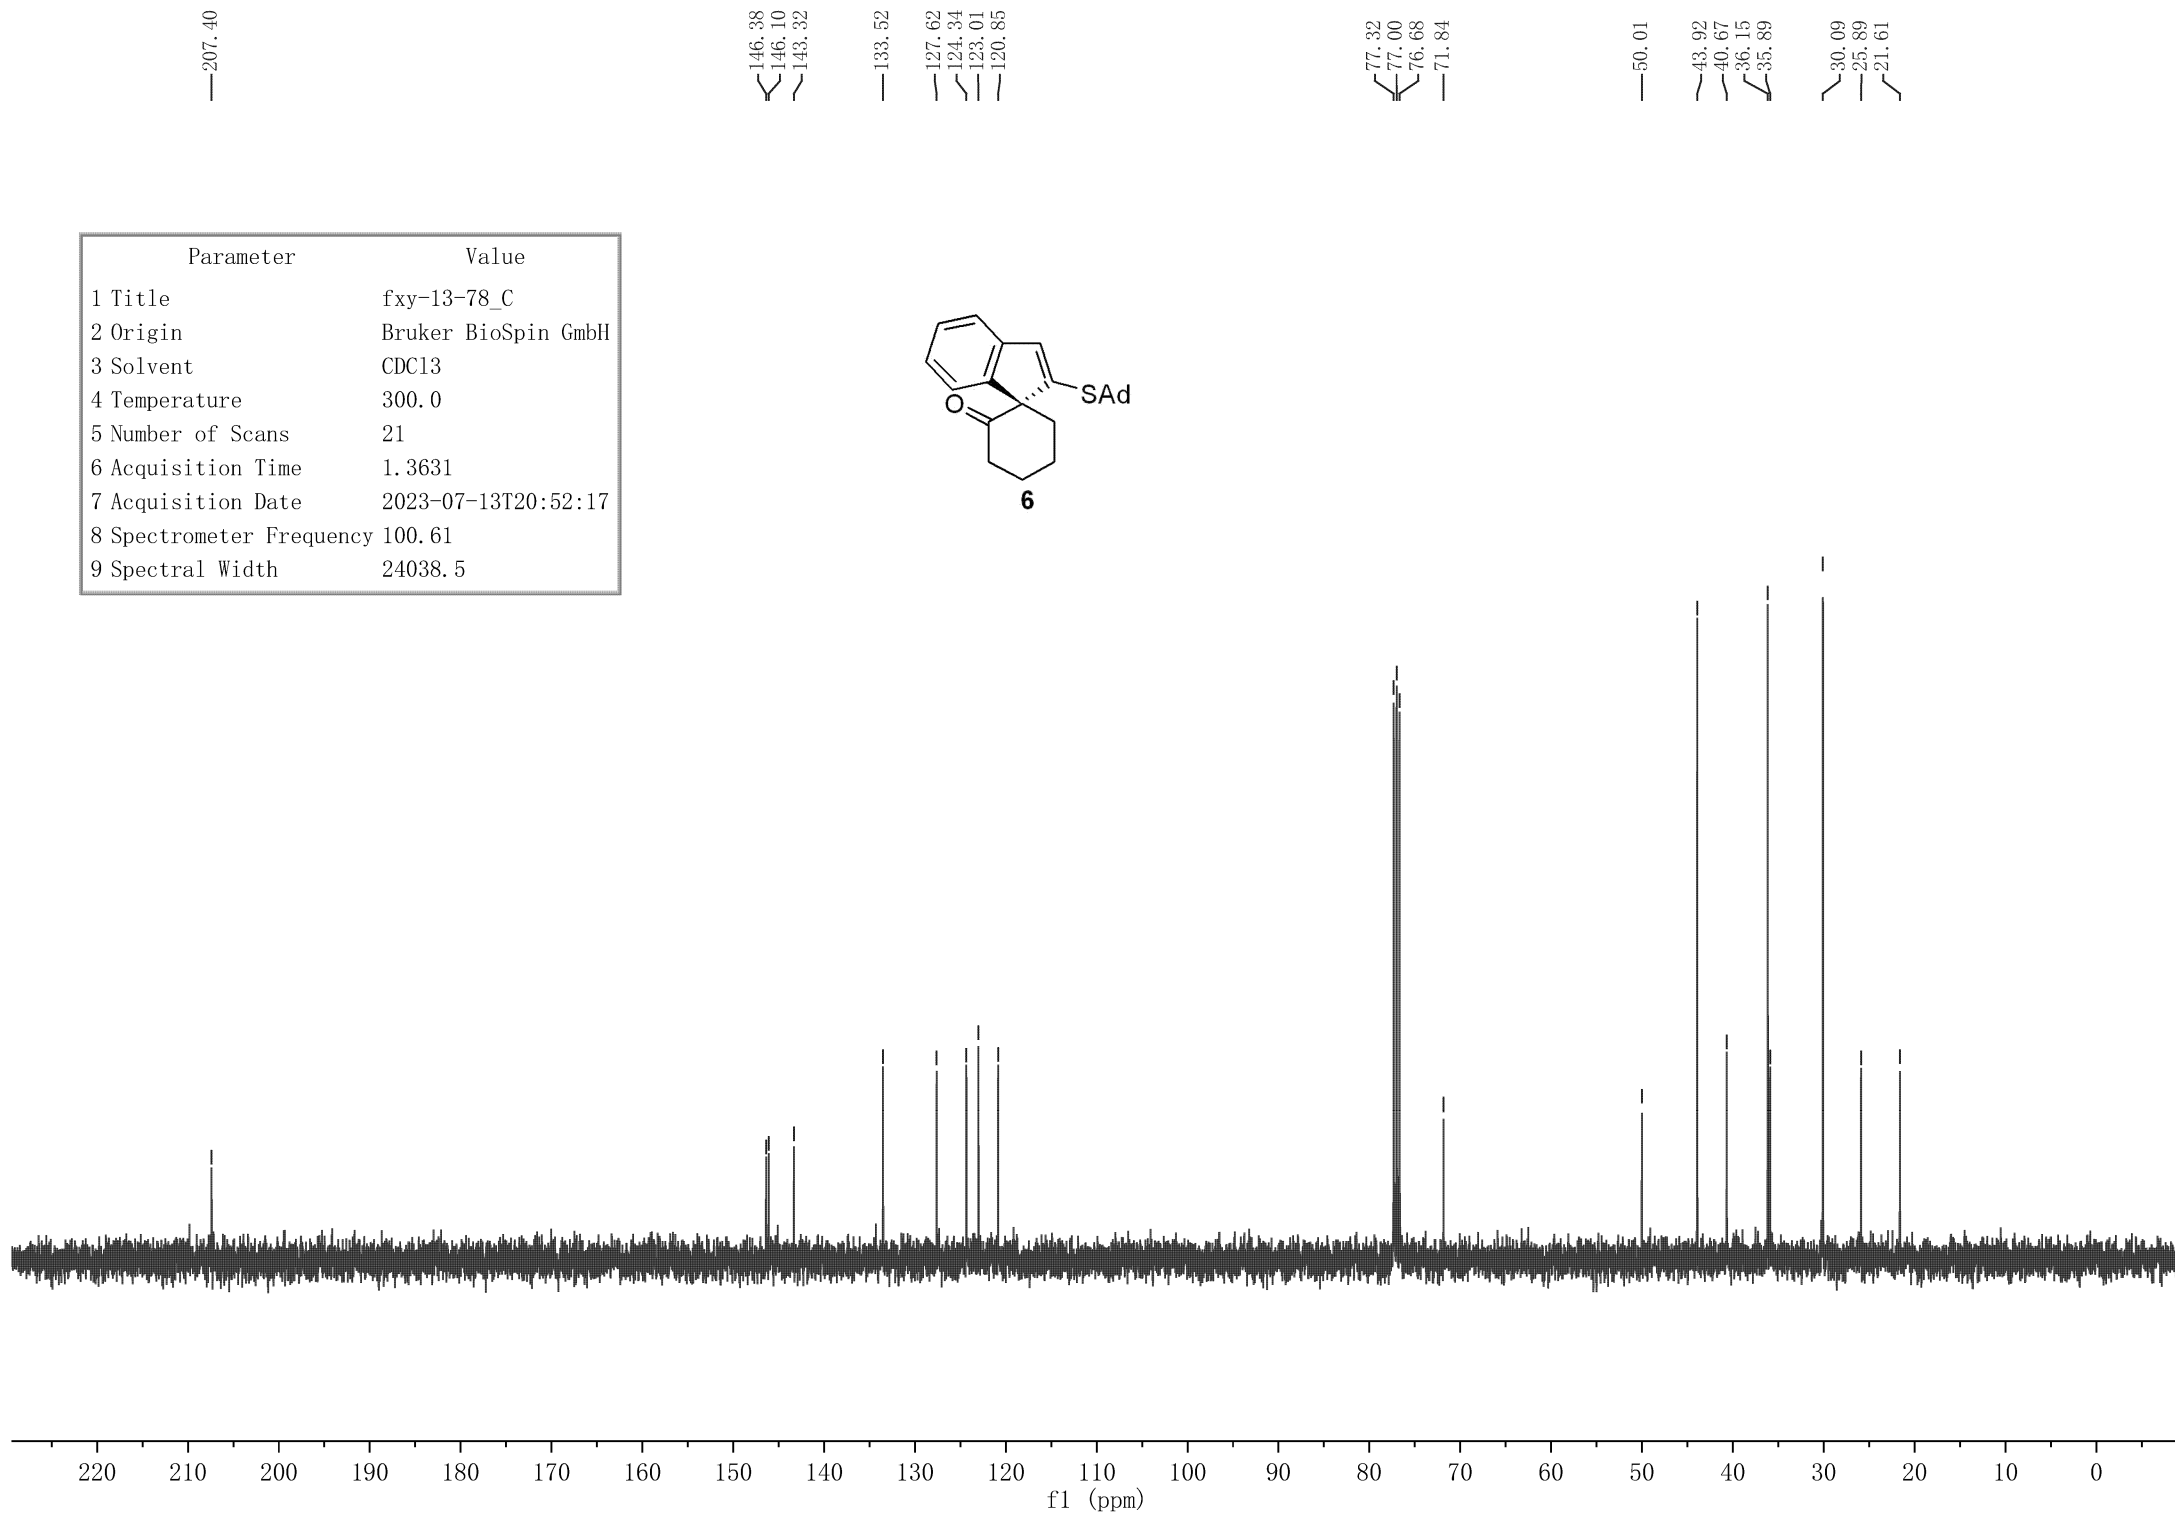

| Parameter                | Value               |
|--------------------------|---------------------|
| 1 Title                  | fxv-13-78_dept      |
| 2 Origin                 | Bruker BioSpin GmbH |
| 3 Solvent                | CDC13               |
| 4 Temperature            | 300.0               |
| 5 Number of Scans        | 13                  |
| 6 Acquisition Time       | 1.3631              |
| 7 Acquisition Date       | 2023-07-13T20:50:52 |
| 8 Spectrometer Frequency | 100.61              |
| 9 Spectral Width         | 24038.5             |

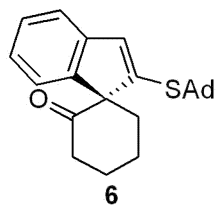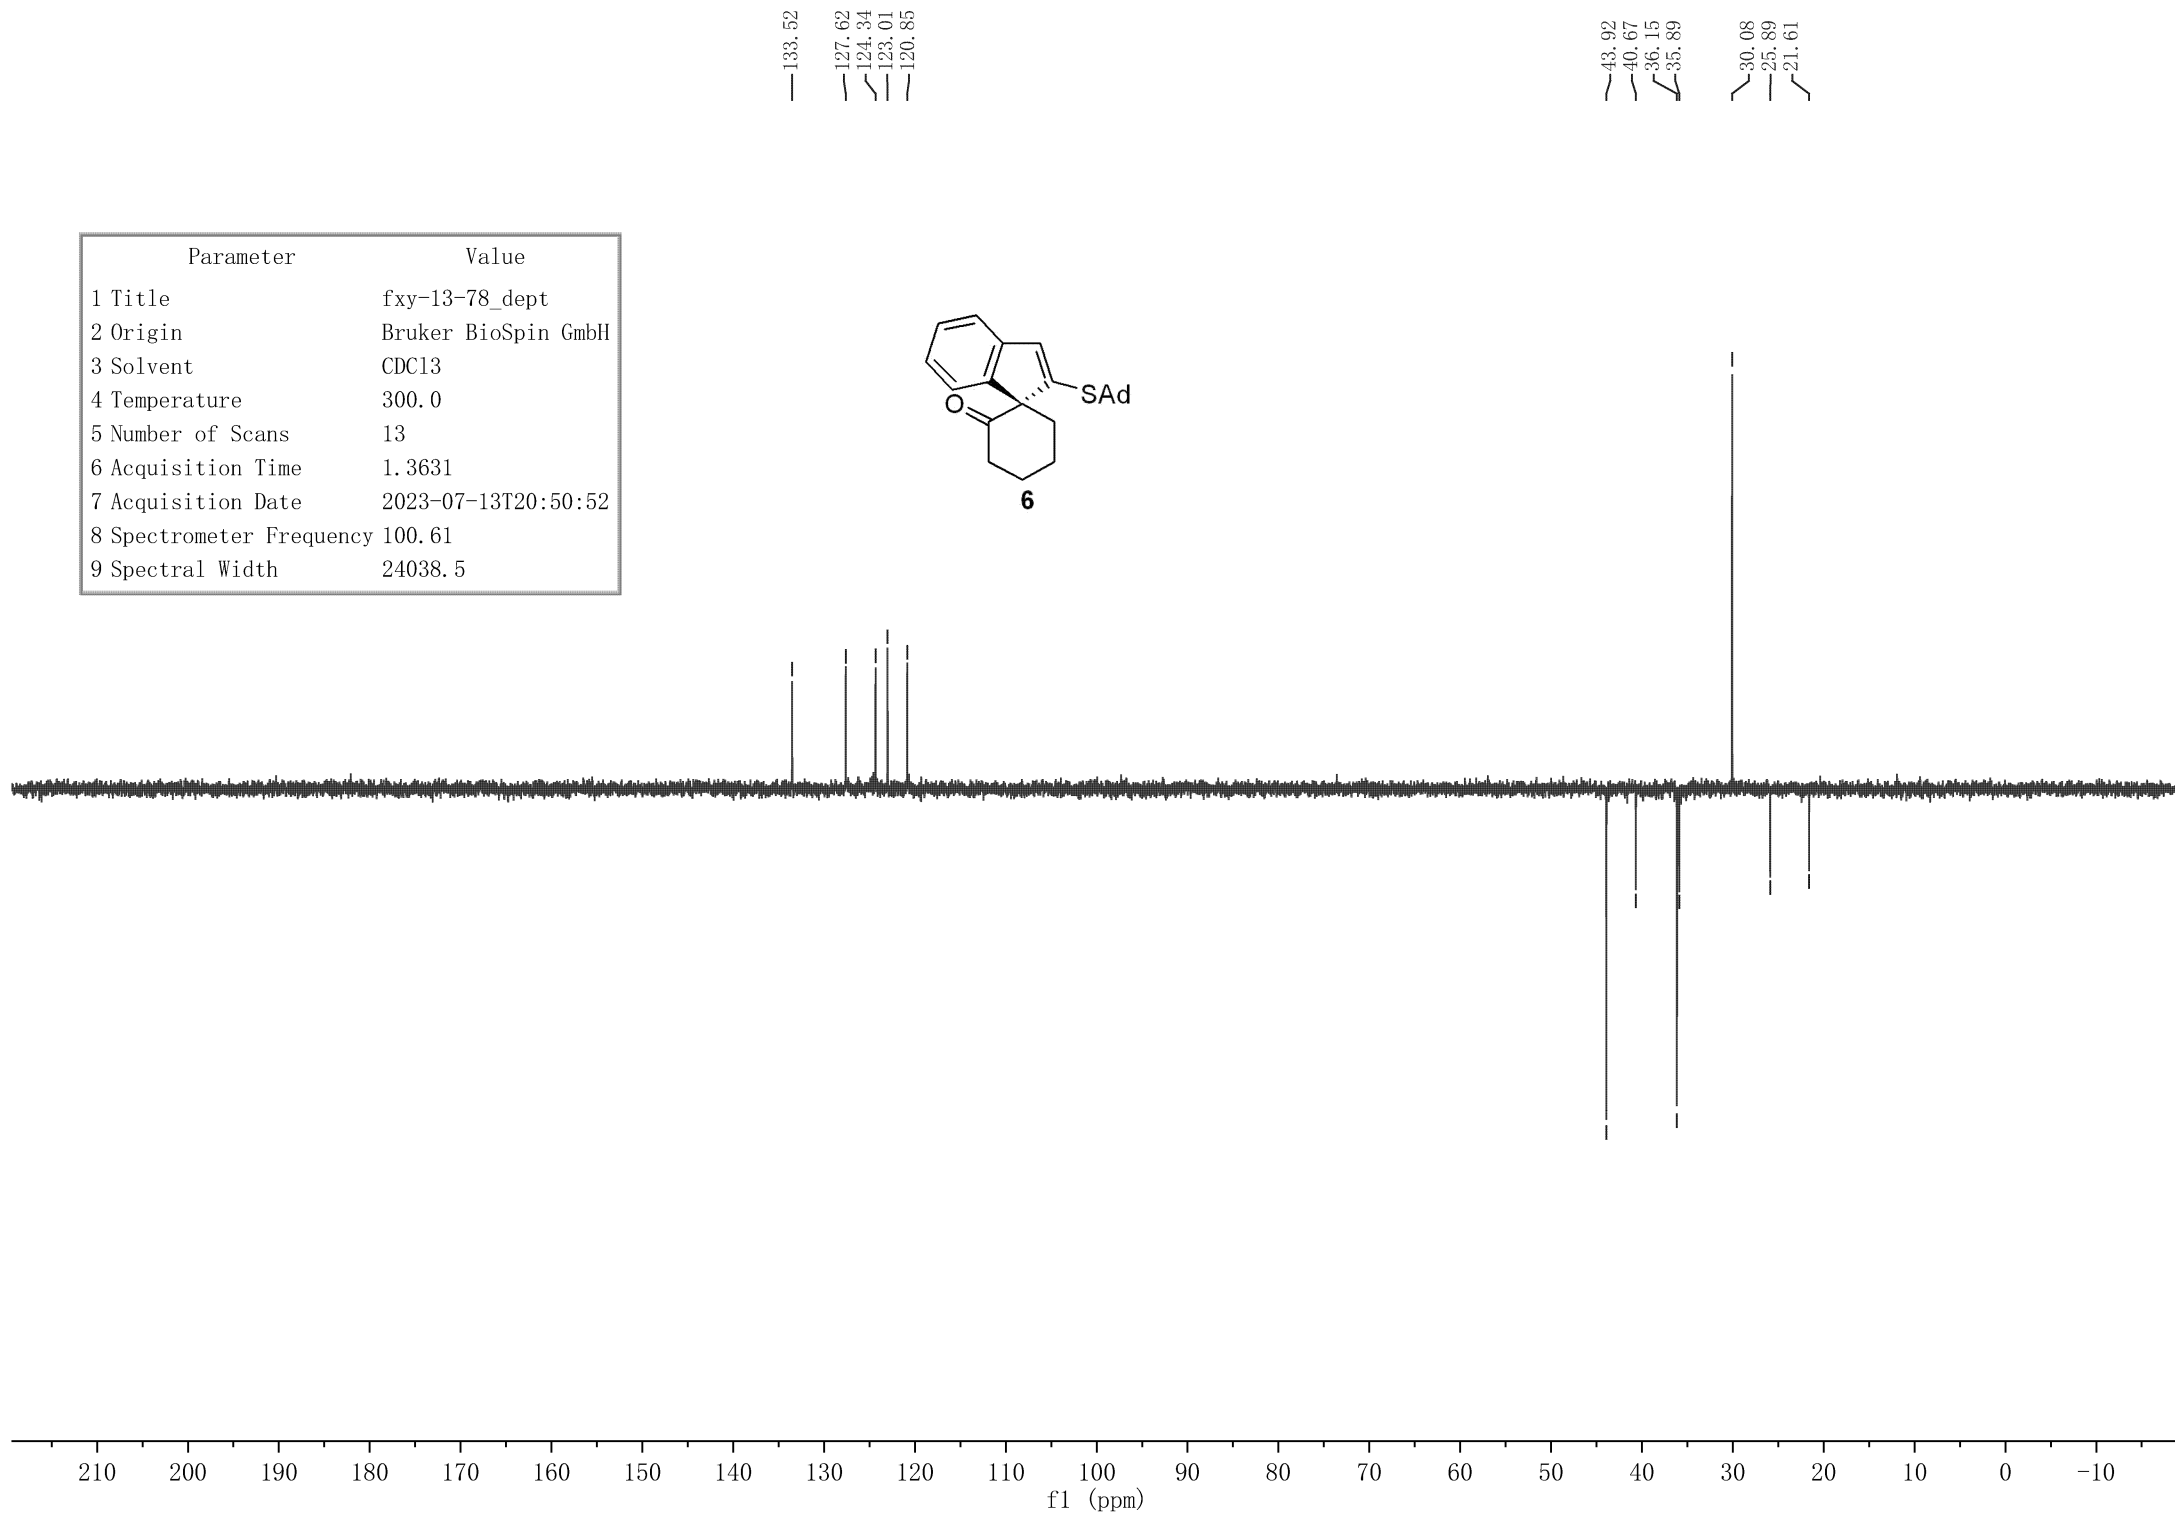

| Parameter                | Value               |
|--------------------------|---------------------|
| 1 Title                  | 7                   |
| 2 Origin                 |                     |
| 3 Solvent                | CDC13               |
| 4 Temperature            | 299.8               |
| 5 Number of Scans        | 16                  |
| 6 Acquisition Time       | 4.0002              |
| 7 Acquisition Date       | 2022-07-05T21:31:42 |
| 8 Spectrometer Frequency | 399.92              |
| 9 Spectral Width         | 8012.0              |

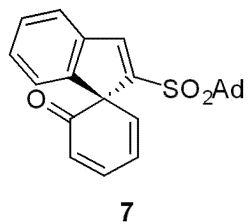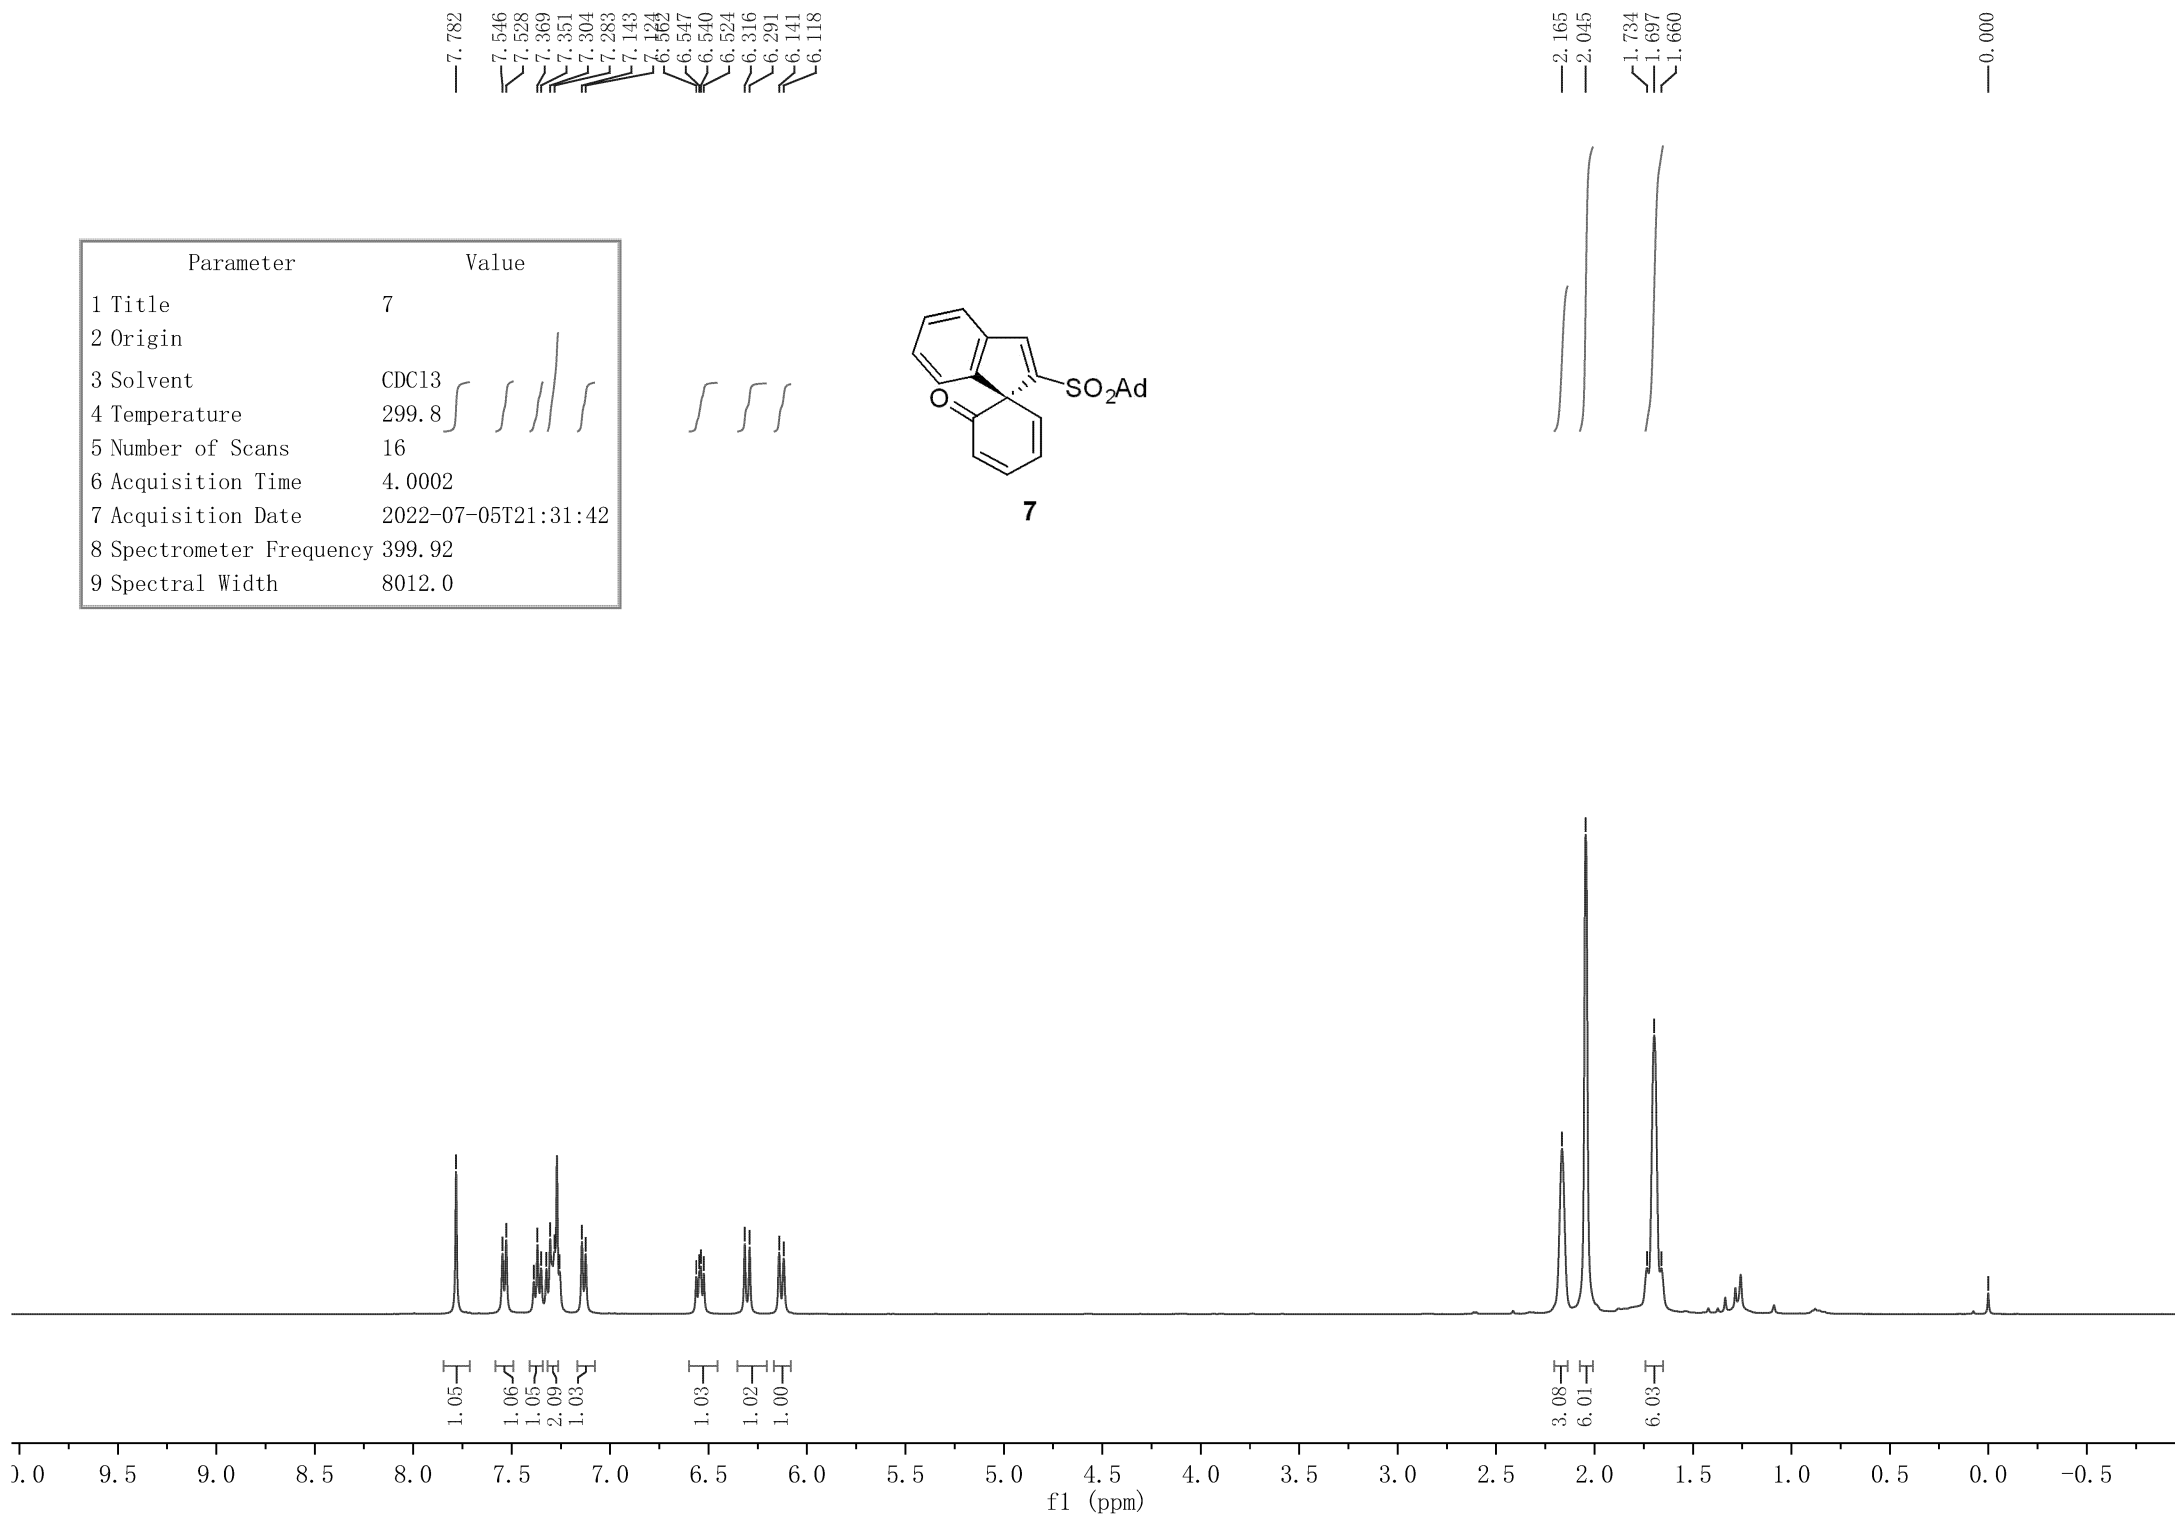

— 193.67

147.96  
145.39  
145.28  
142.89  
141.06  
138.90  
129.43  
128.74  
127.41  
124.81  
122.44  
122.23

77.32  
77.00  
76.68  
69.66  
62.70

35.66  
34.68  
28.26

| Parameter                | Value               |
|--------------------------|---------------------|
| 1 Title                  | 7                   |
| 2 Origin                 |                     |
| 3 Solvent                | CDC13               |
| 4 Temperature            | 299.8               |
| 5 Number of Scans        | 600                 |
| 6 Acquisition Time       | 1.0000              |
| 7 Acquisition Date       | 2022-07-05T21:54:07 |
| 8 Spectrometer Frequency | 100.56              |
| 9 Spectral Width         | 26041.0             |

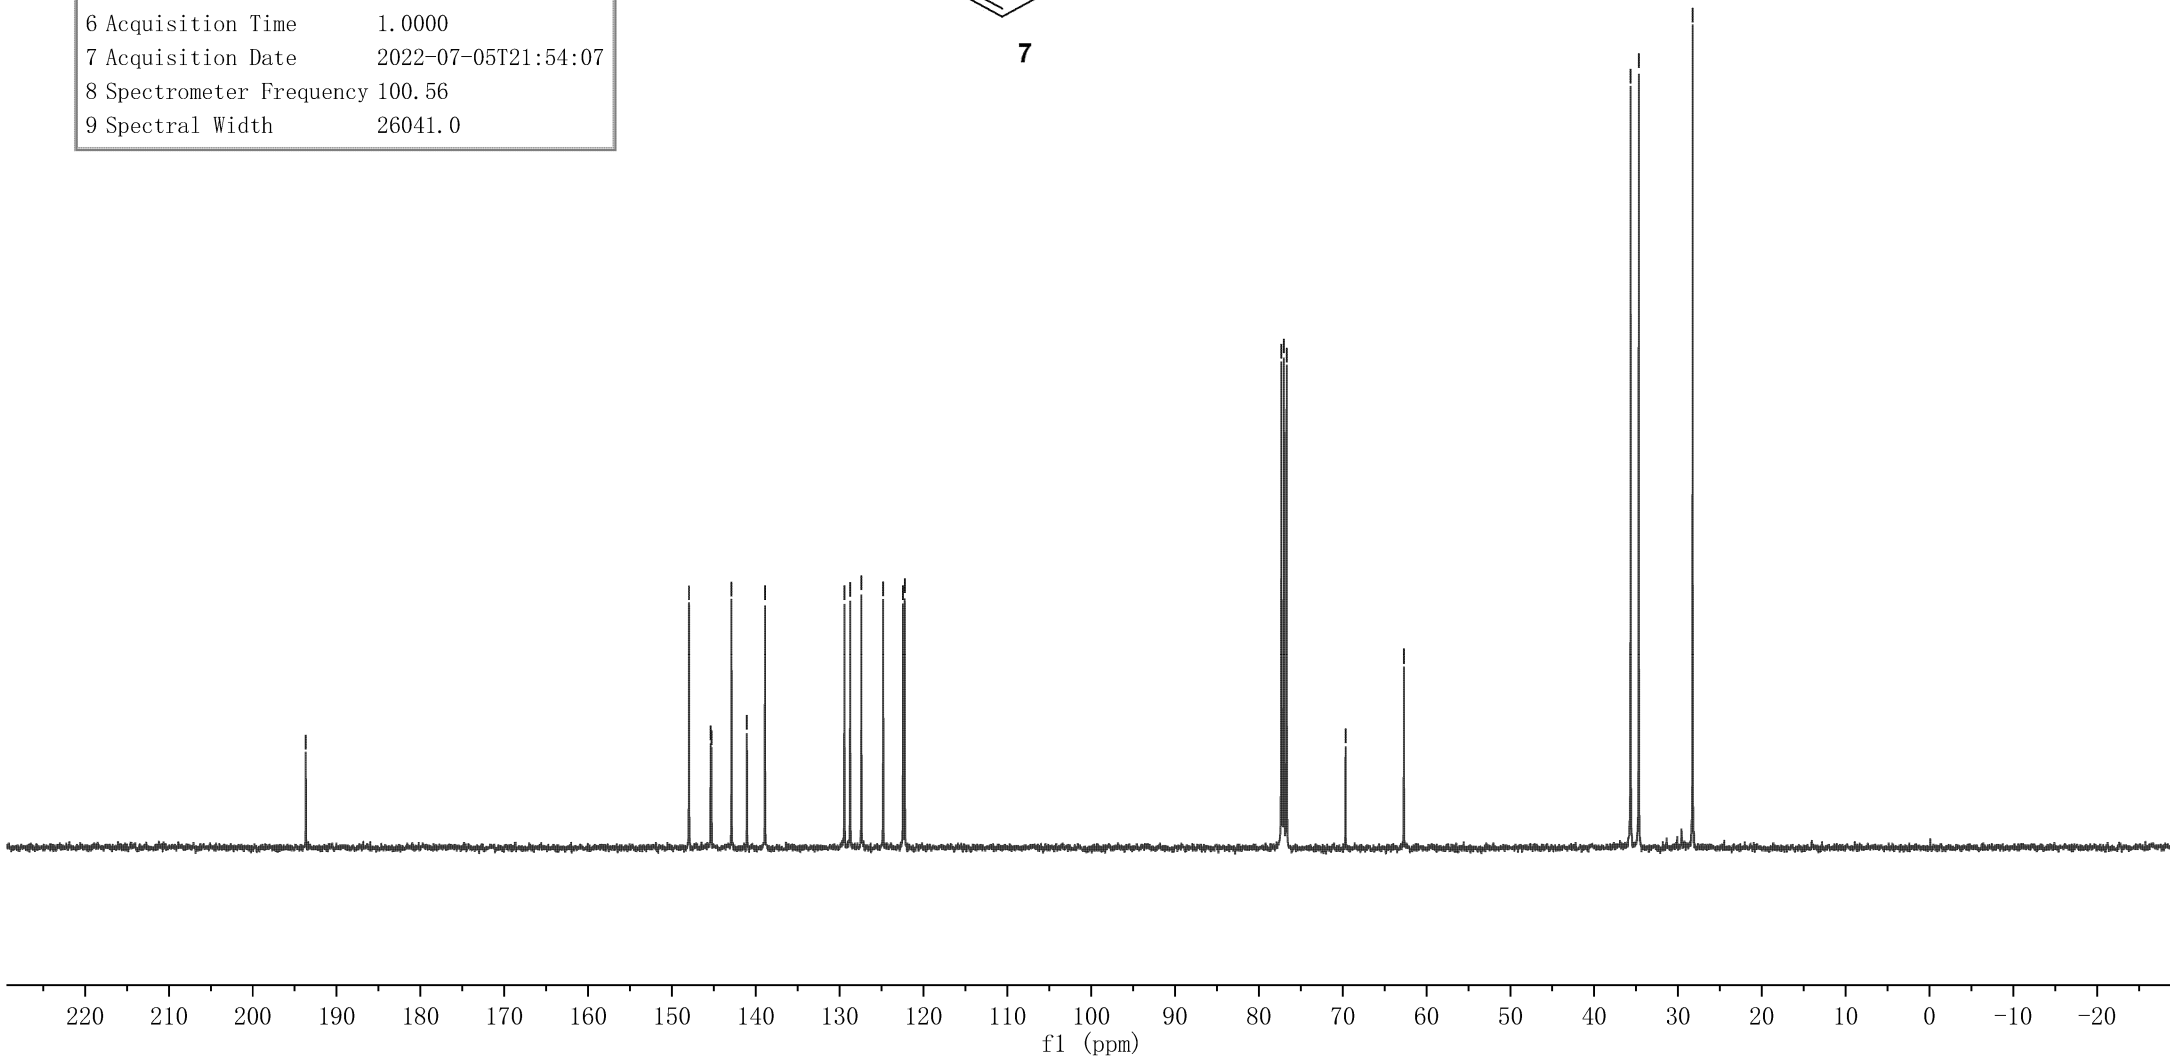

— 147.95  
— 142.87  
— 138.90  
129.42  
128.73  
127.40  
124.79  
122.42  
122.22

35.66  
34.68  
— 28.26

| Parameter                | Value               |
|--------------------------|---------------------|
| 1 Title                  | 7                   |
| 2 Origin                 |                     |
| 3 Solvent                | CDC13               |
| 4 Temperature            | 299.6               |
| 5 Number of Scans        | 256                 |
| 6 Acquisition Time       | 1.0001              |
| 7 Acquisition Date       | 2022-07-05T22:09:43 |
| 8 Spectrometer Frequency | 100.56              |
| 9 Spectral Width         | 18028.0             |

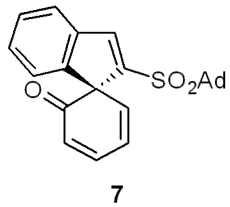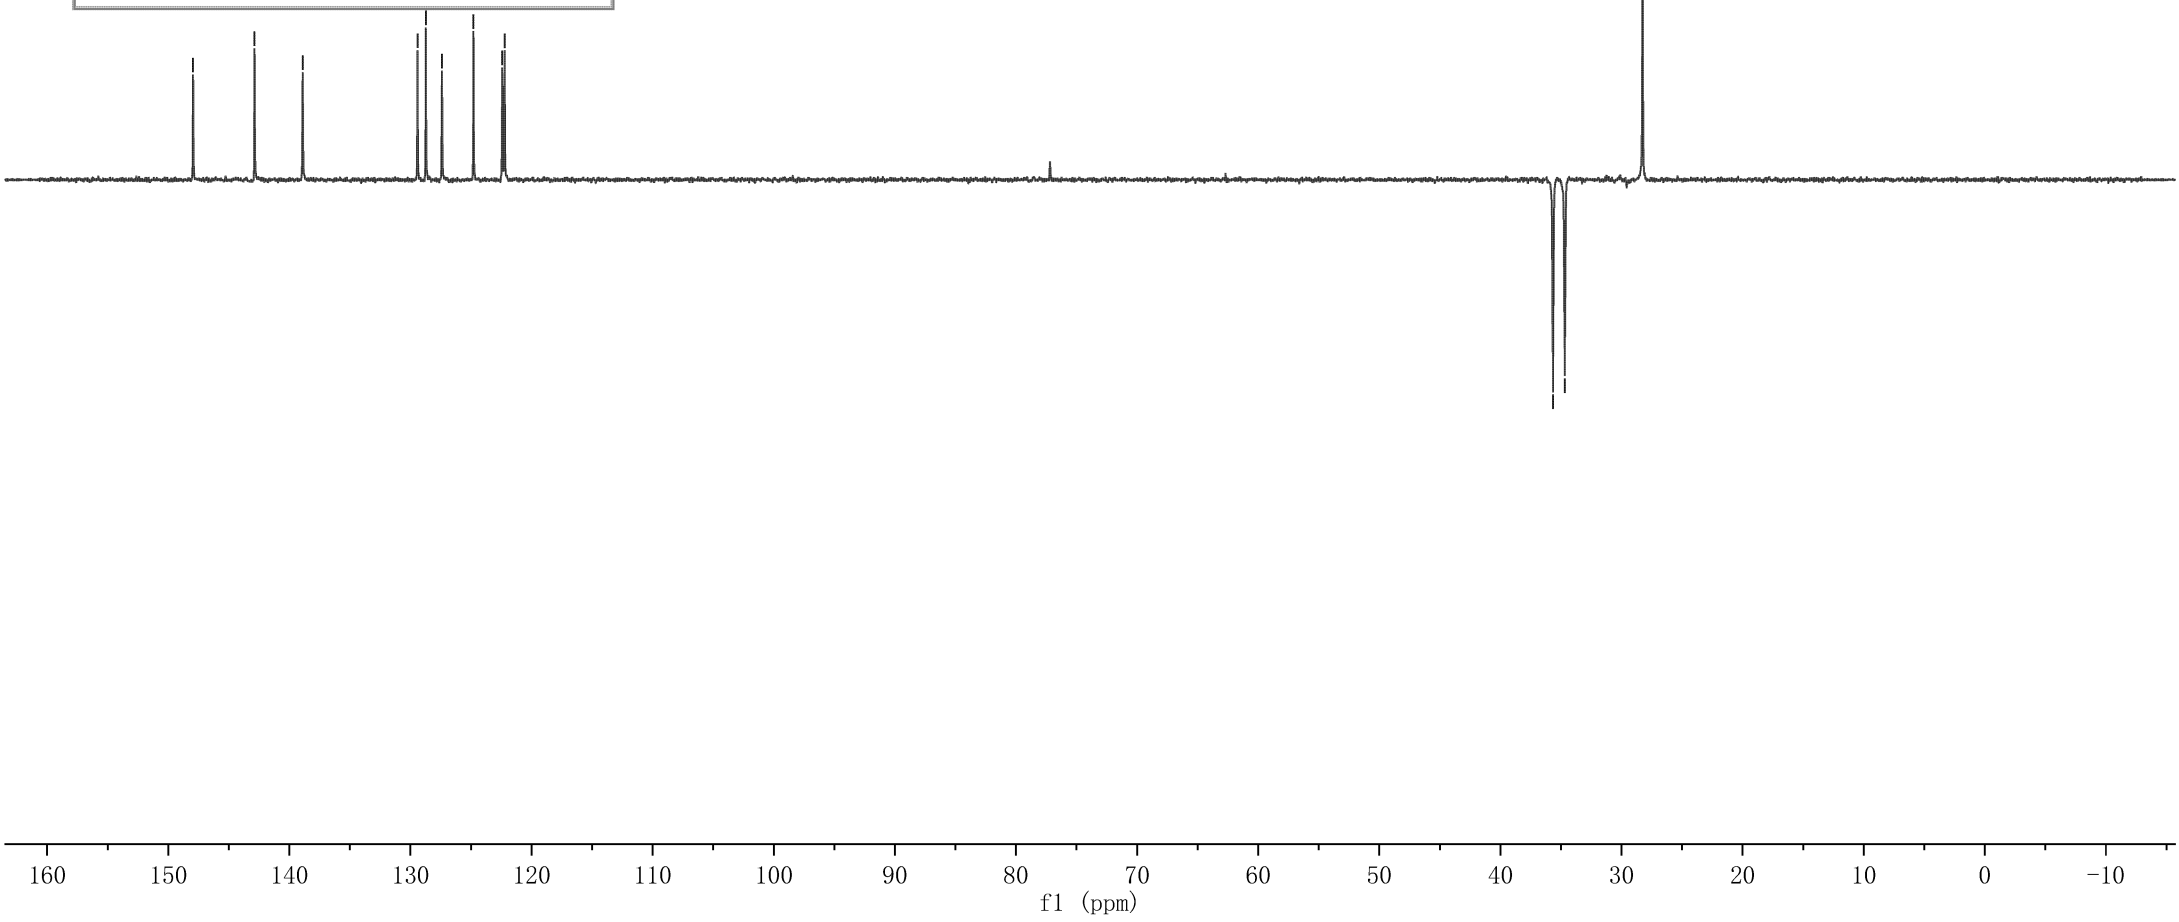

| Parameter                | Value               |
|--------------------------|---------------------|
| 1 Title                  | NBS                 |
| 2 Origin                 |                     |
| 3 Solvent                | CDC13               |
| 4 Temperature            | 299.6               |
| 5 Number of Scans        | 50                  |
| 6 Acquisition Time       | 4.0002              |
| 7 Acquisition Date       | 2022-08-17T13:02:31 |
| 8 Spectrometer Frequency | 399.92              |
| 9 Spectral Width         | 8012.0              |

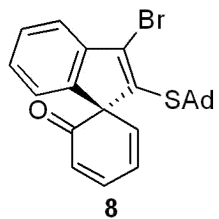

7.466  
7.447  
7.403  
7.384  
7.365  
7.272  
7.245  
7.233  
7.226  
7.050  
7.031  
6.552  
6.544  
6.529  
6.262  
6.240  
5.934  
5.911

2.020  
1.984  
1.949  
1.638

0.000

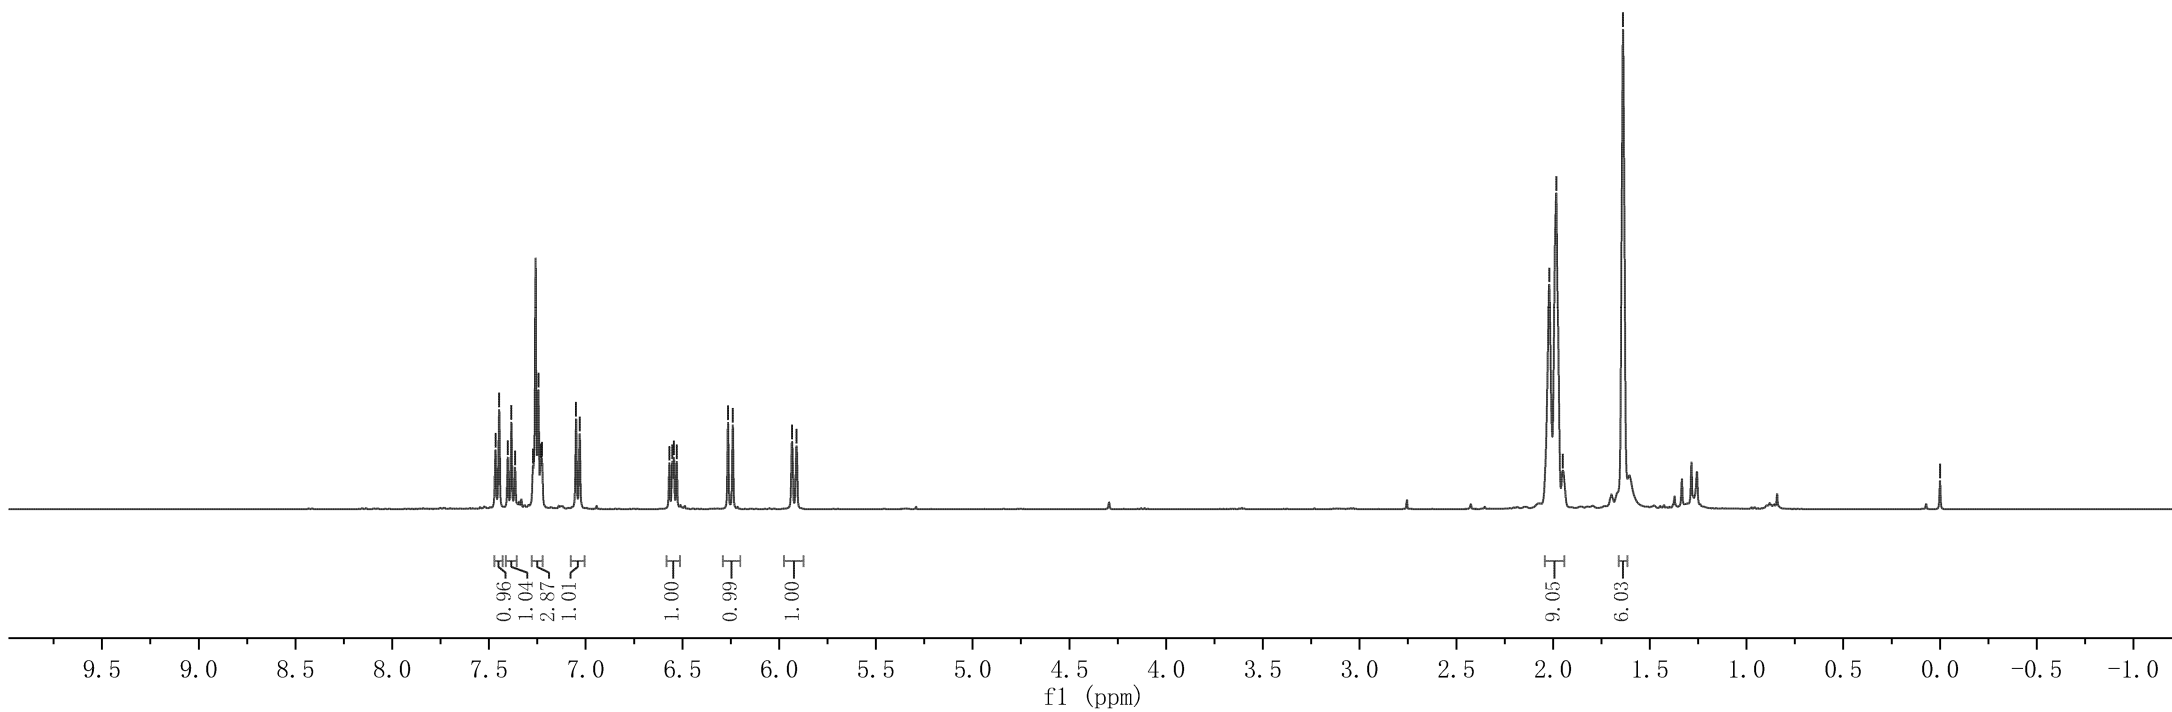



| Parameter                | Value               |
|--------------------------|---------------------|
| 1 Title                  | NBS                 |
| 2 Origin                 |                     |
| 3 Solvent                | CDC13               |
| 4 Temperature            | 299.9               |
| 5 Number of Scans        | 1024                |
| 6 Acquisition Time       | 1.0000              |
| 7 Acquisition Date       | 2022-08-17T13:39:18 |
| 8 Spectrometer Frequency | 100.56              |
| 9 Spectral Width         | 26041.0             |

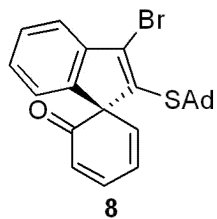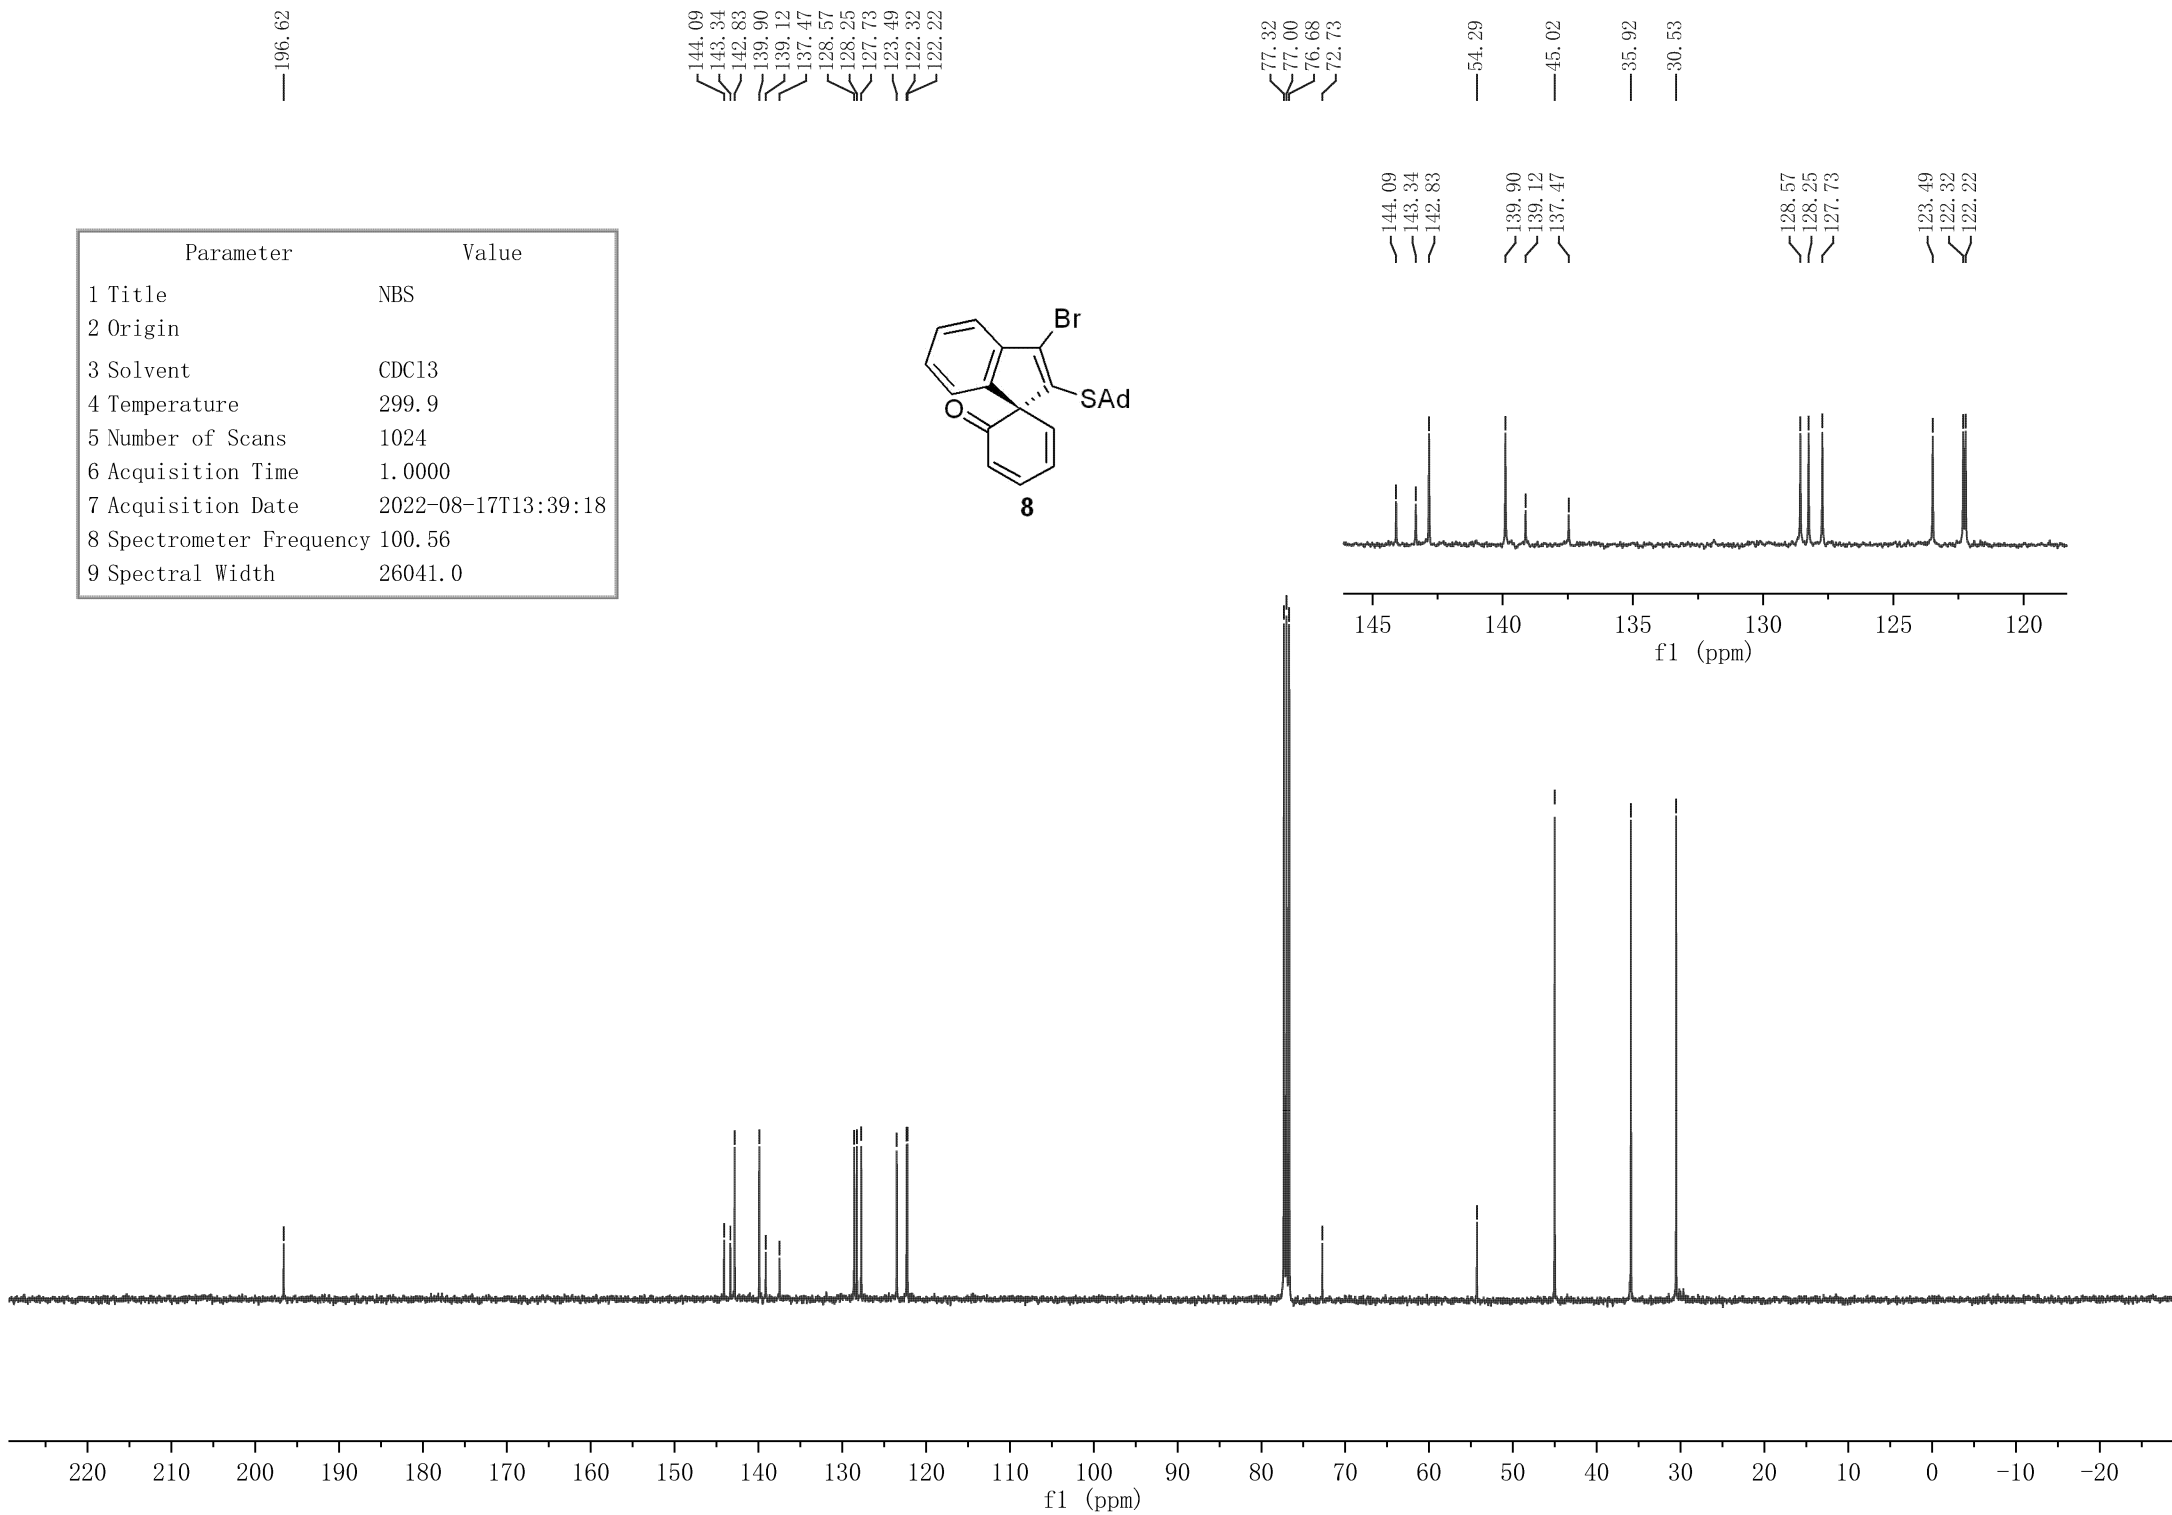

142.81  
139.90

128.56  
128.25  
127.73  
123.48  
122.31  
122.22

45.02

35.92

30.53

| Parameter                | Value               |
|--------------------------|---------------------|
| 1 Title                  | NBS                 |
| 2 Origin                 |                     |
| 3 Solvent                | CDC13               |
| 4 Temperature            | 299.8               |
| 5 Number of Scans        | 25                  |
| 6 Acquisition Time       | 1.0001              |
| 7 Acquisition Date       | 2022-08-17T13:55:12 |
| 8 Spectrometer Frequency | 100.56              |
| 9 Spectral Width         | 18028.0             |

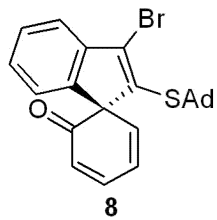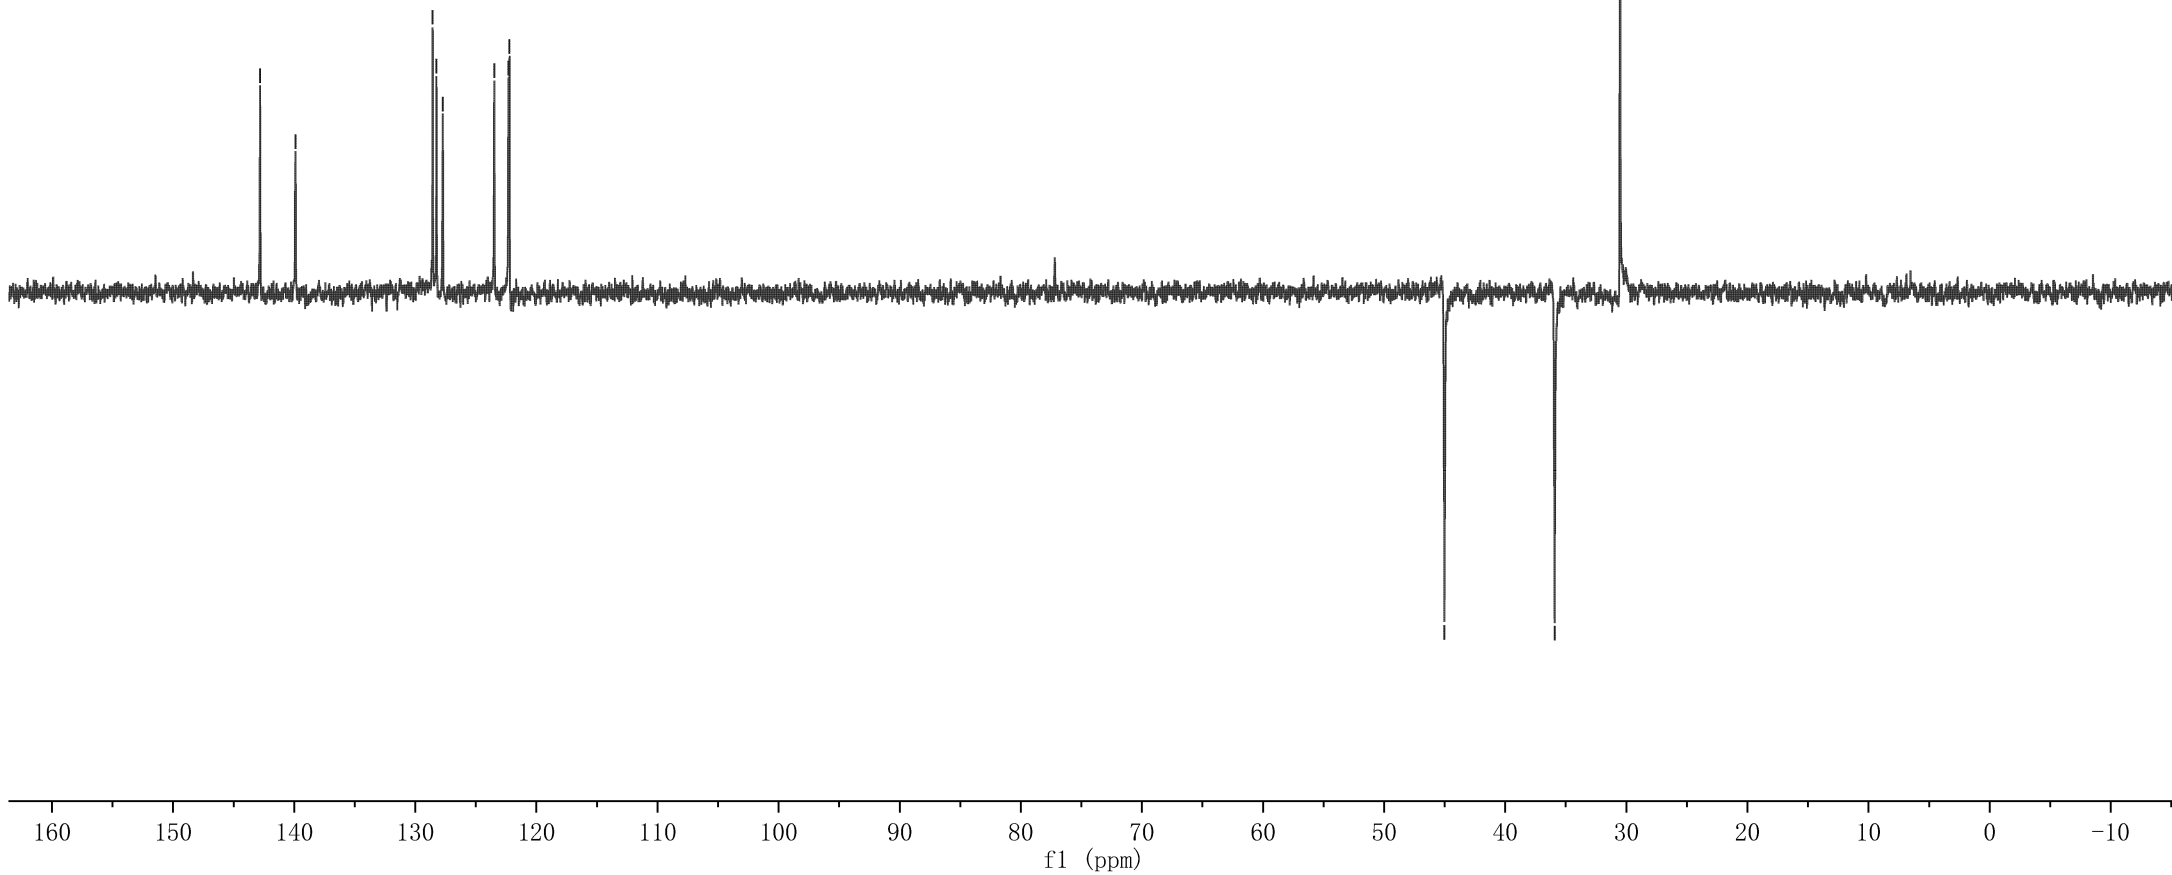

Supplement: d3gc03222a1.pdf [file d3gc03222a1.pdf]
